# Supplementary material for: Identification of Protein Complexes by Integrating Protein Abundance and Interaction Features Using a Deep Learning Strategy
Source: Int J Mol Sci. 2023 Apr 26;24(9):7884. doi: 10.3390/ijms24097884 (PMC10178578; doi:10.3390/ijms24097884)
Supplement: Supplementary file 1 [file ijms-24-07884-s001.zip]

Archive with 11 entries (11 files):
- Figure_S1.tif
- Figure_S2.jpg
- Figure_S3.jpg
- Figure_S4.jpg
- Figure_S5.jpg
- Figure_S6.jpg
- Supplementary.pdf
- Table S1.xlsx
- Table S2.xlsx
- Table S3.xlsx
- Table S4.txt
