# Supplementary material for: Identification of Protein Complexes by Integrating Protein Abundance and Interaction Features Using a Deep Learning Strategy
Source: Int J Mol Sci. 2023 Apr 26;24(9):7884. doi: 10.3390/ijms24097884 (PMC10178578; doi:10.3390/ijms24097884)
Supplement: Supplementary file 1 [file ijms-24-07884-s001.zip › Table S1.xlsx]

## Sheet: Table S1A Projects Information
	Table S1A. List of Projects Information
	Listed are the whole projects that obtained from PRIDE, with information of project accession, title, project description, publication date, et.al..
	Project Accession	Title	Project Description	Publication Date	Submission Type	Species	Tissues	PTM Names	Instrument Names	Project Tags
	PXD008047	Ovarian high grade serous carcinoma ascites cell secretome	The secretomes of tumor cells, and macrophages from high grade s	2017-11-17	PARTIAL	Homo sapiens (Human)	ascites	monohydroxylated residue|acetylated residue	Q Exactive	Biomedical
	PXD006138	Ovarian high grade serous carcinoma ascites cell proteoms	Tumor cells, macrophages and T cells from high grade serous ovar	2017-11-17	PARTIAL	Homo sapiens (Human)	ascites	monohydroxylated residue|acetylated residue	Q Exactive	Biomedical
	PXD001194	PROMIS-Quan: a novel proteomic method for plasma biomarker quantification	Unbiased proteomic analysis of plasma samples holds the promise	2015-01-28	PARTIAL	Homo sapiens (Human)	blood plasma	No PTMs are included in the dataset	Q Exactive	Technical|Biomedical
	PXD001066	Reference proteome of highly purified human Th1 cells reveals strong effects on metabolism and protein ubiquitination upon differentiation	The differentiation of human CD4+ T cells into different subtype	2015-10-13	PARTIAL	Homo sapiens (Human)	blood	No PTMs are included in the dataset	LTQ Orbitrap Velos	Biomedical
	PXD004678	Proteomics of human dendritic cell subsets	We exploited label-free quantitative mass spectrometry to compar	2016-09-27	PARTIAL	Homo sapiens (Human)	blood	No PTMs are included in the dataset	LTQ FT	Biological|Biomedical
	PXD003935	Profiling of Human Circulating Plasma Microparticle Associated Proteins by DDA and DIA	Cells of the vascular system release spherical vesicles, called	2016-10-18	PARTIAL	Homo sapiens (Human)	blood plasma	iodoacetamide derivatized residue|phosphorylated residue|monohydroxylated residue|carbamoylated residue|acetylated residue	Q Exactive	Biomedical
	PXD004637	Label-free analysis of CD8+ T cell subset proteomes supports a progressive differentiation model of virus-specific T cells in humans	Different pathogens trigger naÌøve T cells to express distinct se	2017-05-02	PARTIAL	Homo sapiens (Human)	blood	iodoacetamide derivatized residue|monohydroxylated residue|acetylated residue	Orbitrap Fusion ETD	Biological|Biomedical
	PXD003931	miR-125a Confers Multi-Lineage Long-Term Repopulating Stem Cell Activity to Murine and Human Hematopoietic Progenitors	Umbilical cord blood (CB) is a non-invasive, convenient and broa	2017-01-11	PARTIAL	Homo sapiens (Human)	blood	monohydroxylated residue|acetylated residue	Orbitrap Fusion ETD	Biomedical
	PXD004816	Protein abundance of AKT and ERK pathway components governs cell-type-specific regulation of proliferation	Signaling through the AKT and ERK pathways controls cell prolife	2017-01-30	PARTIAL	Homo sapiens (Human)	blood	No PTMs are included in the dataset	Q Exactive	Biological|Biomedical
	PXD001170	AML_profiling	LC-MS/MS was used to profile total phosphotyrosine phosphatase i	2017-02-16	PARTIAL	Homo sapiens (Human)	blood	L-cysteine sulfenic acid|phosphorylated residue	LTQ Orbitrap Elite	Biomedical
	PXD005214	Phosphoproteins in extracellular vehicles as candidate markers for breast cancer	The state of protein phosphorylation can be a key determinant of	2017-03-23	PARTIAL	Homo sapiens (Human)	blood plasma|cell culture	phosphorylated residue	LTQ Orbitrap Velos|Q Exactive	Biomedical
	PXD004352	Social Network Architecture of Human Immune Cells Unveiled by Quantitative Proteomics	The immune system is unique in its dynamic interplay between num	2017-03-15	PARTIAL	Homo sapiens (Human)	blood	iodoacetamide derivatized residue|monohydroxylated residue|deamidated residue|acetylated residue	Q Exactive	Biological|Biomedical
	PXD005610	Label free quantitative mass spectrometry identifies platelet degranulation as an early event during platelet storage	Shelf life of platelet concentrates (PCs) is limited to up to 7	2017-09-11	PARTIAL	Homo sapiens (Human)	blood platelet	iodoacetamide derivatized residue|monohydroxylated residue|acetylated residue	Orbitrap Fusion ETD	Biomedical
	PXD006354	Proteomic signature of environmental oxygen tension modulation of human macrophage polarization and functions	Macrophages are innate immune cells characterized by their plast	2017-09-11	PARTIAL	Homo sapiens (Human)	blood	iodoacetamide derivatized residue|monohydroxylated residue|acetylated residue	impact II	Biological
	PXD008119	A Comprehensive Proteomics Study on Platelet Concentrates: Platelet Proteome, Storage Time and Mirasol Pathogen Reduction Technology	Platelet concentrates (PCs) represent a blood transfusion produc	2018-03-23	PARTIAL	Homo sapiens (Human)	blood platelet	iodoacetamide derivatized residue|monohydroxylated residue|acetylated residue	Orbitrap Fusion	Technical|Biological
	PXD008163	Depleted Prefractionated Human Plasma for Data Independent Acquisition Spectral Library	We established a spectral library for data-independent analysis	2018-04-20	PARTIAL	Homo sapiens (Human)	blood plasma	iodoacetamide derivatized residue	Q Exactive	Biological|Biomedical
	PXD007572	A pipeline for discovery and verification of glycoproteins from plasma-derived extracellular vesicles as breast cancer biomarkers	Glycoproteins comprise more than half of current FDA-approved pr	2018-04-26	PARTIAL	Homo sapiens (Human)	blood plasma	deamidated residue	LTQ Orbitrap Velos	Biomedical
	PXD005477	Quantitative Proteomics Reveals Specialized Wiring of Signaling Pathways that Protects Human Regulatory T Cell Identity - 5 populations ex vivo	Regulatory CD4+ T cells (Tregs) are functionally distinct from c	2018-05-18	PARTIAL	Homo sapiens (Human)	blood	iodoacetamide derivatized residue|monohydroxylated residue|acetylated residue	Orbitrap Fusion ETD	Biomedical
	PXD007745	Quantitative Proteomics Reveals Specialized Wiring of Signaling Pathways that Protects Human Regulatory T Cell Identity - 2 populations in vitro	Regulatory CD4+ T cells (Tregs) are functionally distinct from c	2018-05-18	PARTIAL	Homo sapiens (Human)	blood	iodoacetamide derivatized residue|acetylated residue	Orbitrap Fusion ETD	Biological
	PXD007744	Quantitative Proteomics Reveals Specialized Wiring of Signaling Pathways that Protects Human Regulatory T Cell Identity - 6 populations ex vivo	Regulatory CD4+ T cells (Tregs) are functionally distinct from c	2018-05-18	PARTIAL	Homo sapiens (Human)	blood	iodoacetamide derivatized residue|acetylated residue	Orbitrap Fusion ETD	Biological
	PXD005426	Concert between cytokines and costimulatory domains to optimize chimeric antigen receptor immunotherapy in neuroblastoma model	Adoptive T cell therapy with gene-modified T cells expressing ch	2018-06-27	PARTIAL	Homo sapiens (Human)	blood	iodoacetamide derivatized residue|phosphorylated residue|monohydroxylated residue|deamidated residue|acetylated residue	LTQ Orbitrap Velos	Biomedical
	PXD006201	Characterisation of protein ubiquitination using UbiSite technology	We present a novel immune-affinity-based method UbiSite for capt	2018-07-03	PARTIAL	Homo sapiens (Human)	blood|larynx squamous cell carcinoma cell line	ubiquitinylated lysine|ubiquitination signature dipeptidyl lysine	Q Exactive HF	Technical|Biological
	PXD006176	Syntaxin-3 is a Weibel-Palade body localized SNARE protein that regulates Von Willebrand factor secretion from endothelial cells	Endothelial cells store von Willebrand factor (VWF) in rod-shape	2018-07-04	PARTIAL	Homo sapiens (Human)	blood	iodoacetamide derivatized residue|monohydroxylated residue|acetylated residue	Orbitrap Fusion ETD	Biological
	PXD001736	System-wide analysis of SUMOylation dynamics in response to replication stress reveals novel SUMO target proteins and acceptor lysines relevant for genome stability	Genotoxic agents can cause replication fork stalling in dividing	2015-03-12	PARTIAL	Homo sapiens (Human)	bone marrow	sumoylated lysine|iodoacetamide derivatized residue|monohydroxylated residue	Q Exactive	Biological
	PXD006361	Proteomics Reveal Global Regulation of Protein SUMOylation by ATM and ATR Kinases during Replication Stress	The mechanisms that protect eukaryotic DNA duringdepend on sever	2017-10-09	PARTIAL	Homo sapiens (Human)	bone marrow	sumoylated lysine|iodoacetamide derivatized residue|phosphorylated residue|6x(13)C labeled residue	Q Exactive	Biological
	PXD003596	Inhibitory effect of miR-183 on MCM family members	MYCN and HDAC2 jointly repress the transcription of tumor suppre	2016-06-01	PARTIAL	Homo sapiens (Human)	cell culture|brain	iodoacetamide derivatized residue|monohydroxylated residue|acetylated residue	LTQ Orbitrap Velos	Biological
	PXD002516	Human Brain LC-MS/MS	Brian Protein Deamidation Associated with Amyloidosis Revealed b	2016-08-24	PARTIAL	Homo sapiens (Human)	brain	deamidated residue	Q Exactive	Biomedical
	PXD003790	HLA peptides (LC-MSMS) induced by Decitabine in Glioblastoma cell lines	Treatment of cancer cells with anti-cancer drugs often fails to	2016-07-18	PARTIAL	Homo sapiens (Human)	cell culture|brain	monohydroxylated residue|acetylated residue	Q Exactive	Human Immuno-Peptidome Project (HUPO-HIPP)|Biology/Disease-Driven Human Proteome Project (B/D-HPP)|Human Proteome Project|Biomedical
	PXD004437	Evaluation of Non-Supervised MALDI Mass Spectrometry Imaging Combined to MicroProteomics for Glioma Grade III Classification	An integrated diagnosis using molecular features is recommended	2016-12-13	PARTIAL	Homo sapiens (Human)	brain	No PTMs are included in the dataset	Q Exactive	Technical|Biomedical
	PXD007235	Extensive and systematic rewiring of histone post-translational modifications in cancer model systems	Histone post-translational modifications (PTMs) generate a compl	2018-04-06	PARTIAL	Homo sapiens (Human)	brain	monomethylated residue|acetylated residue	Q Exactive	Biological|Biomedical
	PXD005445	CEGS Proteomics	Here we exploit label-free quantitative tandem mass-spectrometry	2018-01-09	PARTIAL	Homo sapiens (Human)	brain	iodoacetamide derivatized residue|monohydroxylated residue|acetylated residue	Q Exactive	Biological
	PXD008127	Identification of tumor antigens among the HLA peptidomes of Glioblastoma tumors and plasma	Glioblastoma multiforme (GBM) is the most aggressive brain tumor	2018-08-06	PARTIAL	Homo sapiens (Human)	brain	iodoacetamide derivatized residue|monohydroxylated residue|acetylated residue	Q Exactive	Biomedical
	PXD002381	Comparison between matched microdissected and whole tissue breast cancer specimen	A total of 38 flash-frozen breast cancer tissues were collected	2016-03-31	PARTIAL	Homo sapiens (Human)	breast cancer cell	iodoacetamide derivatized residue	LTQ Orbitrap	Biomedical
	PXD007595	Unravelling the Mechanism of DFO/DpT44mt-Induced Cell Death in breast cancer cells	Iron is required as a cofactor for many critical cellular enzyme	2018-04-09	PARTIAL	Homo sapiens (Human)	breast cancer cell line	L-methionine sulfoxide|iodoacetamide derivatized residue|deamidated residue	LTQ Orbitrap Velos	Biomedical
	PXD008642	Human breast cancer cell line and tissue, ISE-affinity proteogenomics	Introducing a clinical-practical, alternative splicing activity-	2018-03-20	PARTIAL	Homo sapiens (Human)	breast cancer cell line|cell culture	iodoacetamide derivatized residue|6x(13)C,2x(15)N labeled L-lysine|monohydroxylated residue|6x(13)C labeled L-lysine|6x(13)C,4x(15)N labeled L-arginine|6x(13)C labeled L-arginine	LTQ Orbitrap Velos|Q Exactive	Biomedical
	PXD008012	In vivo phosphoproteomics reveals kinase activity profiles that predict treatment outcome in triple-negative breast cancer	Triple-negative breast cancer (TNBC) lacks prognostic and	2018-07-22	PARTIAL	Homo sapiens (Human)	cell culture|breast	phosphorylated residue	LTQ Orbitrap Elite	PRIME-XS Project|Biomedical
	PXD002802	Uncovering hidden layers of cell cycle regulation through integrative multi-omic analysis	Studying the complex relationship between transcription, transla	2015-09-30	PARTIAL	Homo sapiens (Human)	cell culture	No PTMs are included in the dataset	Q Exactive	Biomedical
	PXD001428	Multiple protease based human phosphopeptide atlas	Site-specific phospho-antibodies are commonly used to study thes	2015-05-27	COMPLETE	Homo sapiens (Human)	cell culture	Carbamidomethyl|Phospho|Acetyl|Oxidation	Orbitrap Fusion|LTQ Orbitrap Elite	Technical|Highlighted
	PXD000708	Irradiation	The project is aimed at measuring DNA-repair enzymes and their c	2016-01-13	PARTIAL	Homo sapiens (Human)	cell culture	phosphorylated residue	LTQ Orbitrap
	PXD002039	Expression dynamics in mammalian cells responding to protein misfolding stress	The relative importance of gene expression regulation at the mRN	2016-03-14	PARTIAL	Homo sapiens (Human)	cell culture	iodoacetamide derivatized residue	LTQ Orbitrap Velos
	PXD001994	miR-126 Governs Human Leukemia Stem Cell Quiescence and Therapeutic Resistance	In acute myeloid leukemia (AML), leukemia stem cells (LSC) play	2016-03-31	PARTIAL	Homo sapiens (Human)	cell suspension culture	iodoacetamide derivatized residue|acetylated residue	Orbitrap Fusion ETD	Biomedical
	PXD001274	Comparison of ribosomes between control and dyskerin-depleted human cells	Dyskerin is a pseudouridine synthase involved in fundamental cel	2015-05-07	PARTIAL	Homo sapiens (Human)	cell culture|mammary gland tumor cell line	iodoacetamide derivatized residue|monohydroxylated residue|acetylated residue	LTQ Orbitrap Velos	Biomedical
	PXD003664	Serial interactome capture of the human cell nucleus	Novel RNA-guided cellular functions are paralleled by an increas	2016-03-31	PARTIAL	Homo sapiens (Human)	cell suspension culture	iodoacetamide derivatized residue|monohydroxylated residue	Q Exactive	Biological
	PXD001673	26S proteasome is conserved, therapeutically relevant mediator of mutant p53 gain-of-function in cancer	Mutant p53 proteins, resulting form frequent TP53 tumor suppress	2016-05-03	PARTIAL	Homo sapiens (Human)	cell culture	No PTMs are included in the dataset	LTQ Orbitrap	Biomedical
	PXD001018	Divergent Cysteines in FOXO3 and FOXO4 Mediate Paralog-Specific Redox Signaling	Reduction-oxidation (redox) signaling, the translation of an oxi	2014-08-26	PARTIAL	Homo sapiens (Human)	cell culture	N-ethylmaleimide derivatized cysteine|iodoacetamide derivatized residue|deaminated residue|monohydroxylated residue|acetylated residue	LTQ Orbitrap Velos	Biomedical
	PXD001041	Divergent Cysteines in FOXO3 and FOXO4 Mediate Paralog-Specific Redox Signaling	Reduction-oxidation (redox) signaling, the translation of an oxi	2014-08-26	PARTIAL	Homo sapiens (Human)	cell culture	N-ethylmaleimide derivatized cysteine|iodoacetamide derivatized residue|monohydroxylated residue|deamidated residue	LTQ Orbitrap Velos	Biomedical
	PXD000612	Ultra-deep human phosphoproteome reveals different regulatory nature of Tyr and Ser/Thr-based signaling	Regulatory protein phosphorylation controls nearly every normal	2014-08-06	PARTIAL	Homo sapiens (Human)	cell culture	phosphorylated residue	Q Exactive	Biological
	PXD001113	LysargiNase and tryptic digest of MDA-MB 231 cell lysates	Comparison of peptide properties in proteomes digested with Lysa	2014-12-16	PARTIAL	Homo sapiens (Human)	cell culture	iodoacetamide derivatized residue|monomethylated residue|acetylated residue	LTQ Orbitrap	Technical
	PXD001040	Divergent Cysteines in FOXO3 and FOXO4 Mediate Paralog-Specific Redox Signaling	Reduction-oxidation (redox) signaling, the translation of an oxi	2014-08-26	PARTIAL	Homo sapiens (Human)	cell culture	N-ethylmaleimide derivatized cysteine|iodoacetamide derivatized residue|monohydroxylated residue|deamidated residue	LTQ Orbitrap Velos	Biomedical
	PXD000695	In-depth proteomic analyses of ovarian cancer cell line exosomes reveals differential enrichment of functional categories compared to the NCI 60 proteome.	Molecular communication between cancer cells and its stromal mic	2014-01-22	PARTIAL	Homo sapiens (Human)	cell suspension culture	iodoacetamide derivatized residue	Q Exactive	Biomedical
	PXD001553	Proteomic profiling of cathepsin specificity by FPPS	Identification of protease substrates and determination of their	2015-02-10	PARTIAL	Homo sapiens (Human)	cell culture	iodoacetamide derivatized residue|3x(2)H residue methyl ester|monohydroxylated residue	LTQ Orbitrap Velos	Biological
	PXD001550	Human CRC cell line baseline phosphoproteomics	There is a need for robust phosphopeptide enrichment methods to	2015-04-15	PARTIAL	Homo sapiens (Human)	cell culture	iodoacetamide derivatized residue|phosphorylated residue|monohydroxylated residue|acetylated residue	Q Exactive	Technical|Biomedical
	PXD001546	Reproducibility of label-free single-shot phosphoproteomics applied to CRC cell lines	There is a need for robust phosphopeptide enrichment methods to	2015-04-15	PARTIAL	Homo sapiens (Human)	cell culture	iodoacetamide derivatized residue|phosphorylated residue|monohydroxylated residue|acetylated residue	Q Exactive	Technical|Biomedical
	PXD003700	Human Arginine Methylome	Identification of arginine methylation sites in human HEK293 cel	2016-09-30	PARTIAL	Homo sapiens (Human)	cell culture	monomethylated residue	Q Exactive	Biomedical
	PXD003668	Integrative proteomic profiling of ovarian cancer cell lines reveals precursor-cell associated proteins and functional status	A cell line representative of human high-grade serous ovarian ca	2016-08-24	PARTIAL	Homo sapiens (Human)	cell culture	No PTMs are included in the dataset	Q Exactive	Biomedical
	PXD004912	SCAI promotes DNA double-strand break repair in distinct chromosomal contexts	DNA double-strand breaks (DSBs) are highly cytotoxic DNA lesions	2016-12-12	PARTIAL	Homo sapiens (Human)	cell culture	No PTMs are included in the dataset	LTQ Orbitrap	Biological|Biomedical
	PXD003961	Sec62 regulates ER-phagy during recovery from ER stress	Perturbing ER homeostasis activates stress programs collectively	2016-10-11	PARTIAL	Homo sapiens (Human)	cell culture	monohydroxylated residue|acetylated residue	Q Exactive	Biological
	PXD005479	Proteomic profiling of NCI-60 extracellular vesicles uncovers common protein cargo and cancer type-specific biomarkers	Packed with biological information, extracellular vesicles (EVs)	2017-01-31	PARTIAL	Homo sapiens (Human)	cell culture	iodoacetamide derivatized residue|monohydroxylated residue|acetylated residue	LTQ Orbitrap Velos	Biomedical
	PXD004304	Analysis of mixed-oxysterol treatment on the THP-1 macrophage	THP-1 monocytes were differentiated, via PMA treatment, to macro	2017-03-15	PARTIAL	Homo sapiens (Human)	cell culture	No PTMs are included in the dataset	LTQ Orbitrap Velos|Voyager-DE PRO	Biological
	PXD004927	Site-specific mapping of the human SUMO proteome reveals co-modification with phosphorylation (part 1)	Small ubiquitin-like modifiers (SUMOs) are post-translational mo	2017-01-24	PARTIAL	Homo sapiens (Human)	cell culture	sumoylated lysine	Q Exactive HF	Biological
	PXD005296	Site-specific mapping of the human SUMO proteome reveals co-modification with phosphorylation (part 2)	Small ubiquitin-like modifiers (SUMOs) are post-translational mo	2017-01-24	PARTIAL	Homo sapiens (Human)	cell culture	sumoylated lysine	Q Exactive HF	Biological
	PXD003509	Complexome profiling of membrane fraction from Nox4 overexpressing HEK293 cells	Within the family of NADPH oxidases, Nox4 is unique as it is pre	2017-04-07	PARTIAL	Homo sapiens (Human)	cell culture	iodoacetamide derivatized residue	LTQ Orbitrap	Biological
	PXD005349	Combining Affinity Enrichment, Cross-Linking with Photo-Amino Acids, and Mass Spectrometry for Probing Protein Kinase D2 Interactions	We present an approach that relies on the affinity enrichment of	2017-04-10	PARTIAL	Homo sapiens (Human)	cell culture	iodoacetamide derivatized residue|monohydroxylated residue	Orbitrap Fusion	Technical
	PXD005141	Loss-less nano-fractionator for high sensitivity, high coverage proteomics	Recent advances in mass spectrometry (MS)-based proteomics now a	2017-04-10	PARTIAL	Homo sapiens (Human)	cell culture	No PTMs are included in the dataset	Q Exactive
	PXD005758	A method for spatially and temporally resolved protein network interrogation in living cells	Cells operate through protein interaction networks organized in	2017-03-03	PARTIAL	Homo sapiens (Human)	cell culture	iodoacetamide derivatized residue|monohydroxylated residue	Orbitrap Fusion|LTQ Orbitrap Elite	Technical|Biological
	PXD005083	Proteomic and bioinformatic characterization of proteins secreted conventionally and unconventionally from human primary macrophages upon LPS transfection	The non-canonical caspase-4/5 inflammasome has been only very re	2017-03-07	PARTIAL	Homo sapiens (Human)	cell culture	monohydroxylated residue|acetylated residue	Q Exactive	Biological|Biomedical
	PXD004419	Proteomic analysis uncovers common effects of IFN-ë? and IL-27 on antigen presentation machinery components in human cancer cells	IL-27, a member of the IL-12- family of cytokines, has shown ant	2017-05-19	PARTIAL	Homo sapiens (Human)	cell culture	iodoacetamide derivatized residue|monohydroxylated residue|deamidated residue|acetylated residue	LTQ Orbitrap Velos	Biomedical
	PXD006217	Hydrophobic interaction chromatography for bottom-up proteomics	Hydrophobic interaction chromatography as a first dimension to r	2017-05-16	PARTIAL	Homo sapiens (Human)	cell culture	No PTMs are included in the dataset	LTQ Orbitrap	Technical
	PXD006106	Aldehyde exposure unmasks genome instability in cells heterozygous for clinically relevant BRCA2 mutations	Abnormalities provoked in human cells heterozygous for clinicall	2017-06-02	PARTIAL	Homo sapiens (Human)	cell culture	iodoacetamide derivatized residue|monohydroxylated residue	TripleTOF 5600	Biomedical
	PXD000293	Ti4+-IMAC label-free quantification	We combine high-resolution mass spectrometry with Ti4+-IMAC phos	2014-05-21	PARTIAL	Homo sapiens (Human)	cell culture|cell suspension culture	iodoacetamide derivatized residue|phosphorylated residue|monohydroxylated residue|acetylated residue	LTQ Orbitrap Elite	PRIME-XS Project|Biological
	PXD001828	NUP98-HOXA9 acute myeloid leukemia	Mass Spectrometry analysis of the interactome of the oncoprotein	2017-07-10	PARTIAL	Homo sapiens (Human)	cell culture	No PTMs are included in the dataset	LTQ Orbitrap Velos	Biomedical
	PXD006024	AGK human LC-MSMS project part II (immunoprecipitation)	Mutations in the mitochondrial acylglycerol kinase AGK cause Sen	2017-08-14	PARTIAL	Homo sapiens (Human)	cell culture	No PTMs are included in the dataset	Q Exactive	Biomedical
	PXD006583	Human Angiogenin Cytoplasmic Interactomics	Human Angiogenin (hAng) is a member of the ribonuclease A superf	2017-08-11	PARTIAL	Homo sapiens (Human)	cell culture	iodoacetamide derivatized residue|monohydroxylated residue|deamidated residue	LTQ Orbitrap	Biological
	PXD006584	Human Angiogenin Nuclear Interactions	Human Angiogenin (hAng) is a member of the ribonuclease A superf	2017-08-11	PARTIAL	Homo sapiens (Human)	cell culture	iodoacetamide derivatized residue|deaminated residue|monohydroxylated residue	LTQ Orbitrap	Biological
	PXD004075	Spatiotemporal proteomic profiling of cerebral development	iPS cell based neuronal differentiation was used to generate pur	2017-07-14	PARTIAL	Homo sapiens (Human)	cell culture	No PTMs are included in the dataset	Q Exactive	Biological
	PXD006023	AGK human LC-MSMS project part I (proteome)	Mutations in the mitochondrial acylglycerol kinase AGK cause Sen	2017-08-14	PARTIAL	Homo sapiens (Human)	cell culture	No PTMs are included in the dataset	Q Exactive	Biomedical
	PXD004445	Large scale ubiquitination in doxorubicin treated cells	Protein post-translational modification (PTM) plays a central ro	2018-02-23	PARTIAL	Homo sapiens (Human)	cell culture	ubiquitination signature dipeptidyl lysine|iodoacetamide derivatized residue|monohydroxylated residue	LTQ Orbitrap Velos	Biomedical
	PXD008522	Proteomic analysis of triple negative breast cancer cell lines	We analysed aquired chemotherapeutic resistance of two different	2018-02-23	PARTIAL	Homo sapiens (Human)	cell culture	iodoacetamide derivatized residue|monohydroxylated residue	Q Exactive	Biomedical
	PXD008082	Optimized NHS-amine labeling for multiplexed phosphoproteome study.	In this project, we report the detrimental effect of hydroxylami	2018-02-27	PARTIAL	Homo sapiens (Human)	cell culture	phosphorylated residue	LTQ Orbitrap|Q Exactive	Technical
	PXD008160	Multi-laboratory analysis of sample stability for proteomics following non-cooled international transport	As international collaborative research grows there is increasin	2018-03-02	PARTIAL	Homo sapiens (Human)	cell culture	iodoacetamide derivatized residue	Q Exactive	Biomedical
	PXD008212	Picky ‰ÛÒ a simple online method designer for targeted proteomics	The accuracy of the retention time prediction build into picky w	2017-12-13	PARTIAL	Homo sapiens (Human)|Escherichia coli	cell culture	iodoacetamide derivatized residue|monohydroxylated residue|acetylated residue	Q Exactive	Technical
	PXD008287	The HDAC inhibitor SAHA regulates CBX2 stability via a SUMO-triggered ubiquitin-mediated pathway in leukemia	Leukemias are characterized by bone marrow failure due to oncoge	2018-02-27	PARTIAL	Homo sapiens (Human)	cell culture	iodoacetamide derivatized residue	Q Exactive
	PXD008204	Proteomic Identification of Interferon-induced Proteins with Tetratricopeptide Repeats (IFITs) as Markers of M1 Macrophage Polarization	Proteomic studies of macrophage polarization to pro-inflammatory	2018-03-15	PARTIAL	Homo sapiens (Human)	cell culture	iodoacetamide derivatized residue|monohydroxylated residue|acetylated residue	Q Exactive	Biomedical
	PXD003704	Thermal proteome profiling of MCF-7 breast cancer cell line	Palbociclib (Ibrance, Pfizer) is a recent drug approved by the F	2018-04-18	PARTIAL	Homo sapiens (Human)	cell culture	iodoacetamide derivatized residue|hydroxylated proline|monohydroxylated residue|deamidated residue	Orbitrap Fusion ETD	Biomedical
	PXD008500	Ranking the contribution of ankylosing spondylitis-associated ERAP1 polymorphisms to shaping the HLA-B*27 peptidome	The Endoplasmic reticulum aminopeptidase I (ERAP1) trims peptide	2018-04-10	PARTIAL	Homo sapiens (Human)	cell culture	iodoacetamide derivatized residue|monohydroxylated residue|acetylated residue	Q Exactive	Biomedical
	PXD006831	Phosphoproteomics of DIA1-overexpressing HEK cells and protemics of probable DIA1 interactors	Many kinases are still ‰ÛÏorphans‰Û, i.e. knowledge about their sub	2018-03-26	PARTIAL	Homo sapiens (Human)	cell culture	phosphorylated residue|monohydroxylated residue	LTQ Orbitrap Elite	Biological
	PXD005957	Screening for micropeptides in HUVEC with tryptic digestion, part 2	Long non-coding RNAs (lncRNA) are transcribed but not translated	2017-03-27	PARTIAL	Homo sapiens (Human)	cell culture	iodoacetamide derivatized residue	Q Exactive	Biological
	PXD008529	Chemical stresses fail to mimic the unfolded protein response resulting from luminal load with unfolded polypeptides	The stress sensors ATF6, IRE1 and PERK monitor deviations from h	2018-02-16	PARTIAL	Homo sapiens (Human)	cell culture	monohydroxylated residue|acetylated residue	Q Exactive	Biological
	PXD008382	Linking FOXO3, NCOA3, and TCF7L2 to Ras pathway phenotypes through a genome-wide forward genetic screen in human colorectal cancer cellsLinking FOXO3, NCOA3, and TCF7L2 to Ras pathway phenotypes through a genome-wide forward genetic screen in human colorectal cancer cells	Background: The Ras pathway genes KRAS, BRAF or ERBBs have somat	2018-02-20	PARTIAL	Homo sapiens (Human)	cell culture	No PTMs are included in the dataset	Q Exactive	Biomedical
	PXD004288	Monitoring of the spatial and temporal dynamics of BER/SSBR pathway proteins, including MYH, UNG2, MPG, NTH1 and NEIL1-3, during DNA replication, Batch 1	Base lesions in DNA can stall the replication machinery or induc	2017-11-23	PARTIAL	Homo sapiens (Human)	cell culture	iodoacetamide derivatized residue|monomethylated residue|monohydroxylated residue|deamidated residue|acetylated residue	LTQ Orbitrap Elite	Biological
	PXD004555	An optimized version of the Secretome protein enrichment with click sugars (SPECS) method leads to enhanced coverage of the secretome	The secretome, the entirety of all soluble proteins either being	2017-11-24	PARTIAL	Homo sapiens (Human)	cell culture	iodoacetic acid derivatized residue|monohydroxylated residue|acetylated residue	LTQ Orbitrap Velos	Technical|Biological
	PXD006418	Molecular basis of USP7 inhibition by selective small molecule inhibitors	Modification by ubiquitin controls the stability of most cellula	2018-04-05	PARTIAL	Homo sapiens (Human)	cell culture	iodoacetamide derivatized residue|monohydroxylated residue|deamidated residue	Q Exactive HF	Biomedical
	PXD008748	Nucleolar-nucleoplasmic shuttling of the RNA-binding macrodomain-containing TARG1 is controlled by DNA damage-induced poly-ADP-ribose and implies functions in ribosome biogenesis	In this project we employed affinity purification mass spectrome	2018-04-23	PARTIAL	Homo sapiens (Human)	cell culture	iodoacetamide derivatized residue|monohydroxylated residue	LTQ Orbitrap Elite|Q Exactive	Biomedical
	PXD004494	Monitoring of the spatial and temporal dynamics of BER/SSBR pathway proteins, including MYH, UNG2, MPG, NTH1 and NEIL1-3, during DNA replication, Batch 2	Base lesions in DNA can stall the replication machinery or induc	2017-11-23	PARTIAL	Homo sapiens (Human)	cell culture	iodoacetamide derivatized residue|monomethylated residue|deamidated residue|acetylated residue	LTQ Orbitrap Elite	Biological
	PXD005414	Landscape of the Regulatory Elements for Lysine 2-Hydroxyisobutyrylation Pathway	This project reported a comprehensive global lysine 2-hydroxyiso	2017-12-06	PARTIAL	Homo sapiens (Human)	cell culture	iodoacetamide derivatized residue|acetylated residue	Q Exactive	Biological
	PXD006561	CDK4/6 inhibitor resistance in prostate cancer	CDK4/6 kinase inhibitors have shown great promise in clinical tr	2018-05-15	PARTIAL	Homo sapiens (Human)	cell culture	phosphorylated residue	Q Exactive HF	Biomedical
	PXD007695	Lipid droplet-targeted APEX proteome	Lipid droplet (LD) function is regulated by a complement of inte	2017-12-22	PARTIAL	Homo sapiens (Human)	cell culture	biotinylated residue	6410 Triple Quadrupole LC/MS	Technical|Biological
	PXD005913	Nuclear poly(A)-binding protein 1 is an ATM target and essential for DNA double-strand break rep	The DNA damage response (DDR) is an extensive signaling network	2017-11-30	PARTIAL	Homo sapiens (Human)	cell culture	No PTMs are included in the dataset	Q Exactive	Biological
	PXD009302	Proximity labeling by a recombinant APEX2-FGF1 fusion protein reveals interaction of FGF1 with the proteoglycans CD44 and CSPG4	Fibroblast growth factor 1 (FGF1) binds to specific FGF receptor	2018-06-06	PARTIAL	Homo sapiens (Human)	cell culture	monohydroxylated residue|acetylated residue	Q Exactive	Biological
	PXD005739	RNA-binding protein regions in human cells	Idenfication of RNA-binding regions in human proteins using pCLA	2018-06-18	PARTIAL	Homo sapiens (Human)	cell culture	No PTMs are included in the dataset	Q Exactive	Biological
	PXD008554	Quantitative secretomics during cardiomyogenic differentiation of human pluripotent stem cells	Cardiovascular diseases are a major cause of life-threatening bu	2018-06-20	PARTIAL	Homo sapiens (Human)	cell culture	iodoacetamide derivatized residue|deaminated residue|monohydroxylated residue	LTQ Orbitrap Velos	Biological
	PXD007038	SEC-SWATH-MS HEK293	Increasingly, biochemical co-fractionation-based approaches are	2018-06-26	PARTIAL	Homo sapiens (Human)	cell culture	No PTMs are included in the dataset	TripleTOF 5600	Technical|Biological
	PXD008115	eEF1A peptide pull-down LC-MS/MS	Peptide pull-down using synthetic peptides corresponding to unmo	2018-07-04	PARTIAL	Homo sapiens (Human)	cell culture	methylated residue	Q Exactive HF	Biological
	PXD005045	Comparative proteome of the BeWo and HTR8/SVneo trophoblastic cell lines	Here, we have undertaken comparative label-free quantitative (LF	2018-07-05	PARTIAL	Homo sapiens (Human)	cell culture	No PTMs are included in the dataset	Q Exactive	Biological
	PXD005864	Proteomic analysis of neuroblastoma-derived exosomes LC-MS	Neuroblastoma (NB) is the most common extracranial pediatric sol	2018-07-05	PARTIAL	Homo sapiens (Human)	cell culture	iodoacetamide derivatized residue|deamidated residue|acetylated residue	LTQ Orbitrap Velos	Biomedical
	PXD007898	Fibroblast activation	The tumour secretome contains proteinaceous factors that could p	2018-07-23	PARTIAL	Homo sapiens (Human)	cell culture	phosphorylated residue|iodoacetamide derivatized residue|monohydroxylated residue	Q Exactive	Biomedical
	PXD009819	TRPS1 shapes YAP/TEAD-dependent transcription in breast cancer cells	Yes-associated protein (YAP), the downstream transducer of the H	2018-08-09	PARTIAL	Homo sapiens (Human)	cell culture	biotinylated residue|monohydroxylated residue	Orbitrap Fusion Lumos	Biomedical
	PXD008715	Membrane protein interactome	we have developed a new catalytic tagging system and have used i	2018-06-04	PARTIAL	Homo sapiens (Human)	cell culture	iodoacetamide derivatized residue|monohydroxylated residue|deamidated residue|acetylated residue	Q Exactive	Technical|Biological
	PXD001863	Identification of myristoylated proteins in Human cell lines (HEK293, HeLa, MCF7)	Multi-functional capture reagents reported here enable robust id	2015-03-30	PARTIAL	Homo sapiens (Human)	cell culture	myristoylated residue	Q Exactive	Biomedical
	PXD004914	HELA cells PARL Immunoprecipitation	The SPFH (Stomatin, Prohibitin, Flotillin, HflC/K) superfamily i	2016-10-18	PARTIAL	Homo sapiens (Human)	cell culture	No PTMs are included in the dataset	Q Exactive	Biological
	PXD005712	HELA cells PARL Immunoprecipitation part II	Mitochondria drive apoptosis by releasing pro-apoptotic proteins	2017-03-01	PARTIAL	Homo sapiens (Human)	cell culture	No PTMs are included in the dataset	Q Exactive	Biological
	PXD008398	S-acylated and S-palmitoylated proteins in HeLa	S-fatty-acylation is the covalent attachment of long chain fatty	2018-03-28	PARTIAL	Homo sapiens (Human)	HeLa cell	N-ethylmaleimide derivatized cysteine|iodoacetamide derivatized residue|monohydroxylated residue|acetylated residue	LTQ Orbitrap	Biological
	PXD004452	HeLa proteome of 12,250 protein-coding genes	We developed an optimized multi-shot proteomics workflow based o	2017-06-12	PARTIAL	Homo sapiens (Human)	liver|colon	iodoacetamide derivatized residue|phosphorylated residue|monomethylated residue|acetylated residue	Q Exactive	Technical|Biological
	PXD001200	Hela-S3 ATPome	ATP binding proteins (ATPome) dataset and ATPome-wide selectivit	2014-10-20	PARTIAL	Homo sapiens (Human)		No PTMs are included in the dataset	Q Exactive	Biomedical
	PXD003530	Sites of aspirin-mediated lysine acetylation in HeLa cells	Aspirin, or acetylsalicylic acid is widely used to control pain,	2017-01-10	PARTIAL	Homo sapiens (Human)		iodoacetamide derivatized residue|acetylated residue	Q Exactive
	PXD001565	Evaluation of phospho-tyrosine antibodies for label-free phosphoproteomics	In the past decade multiple tyrosine kinase inhibitors (TKIs) ha	2015-12-09	PARTIAL	Homo sapiens (Human)	colon|brain	iodoacetamide derivatized residue|phosphorylated residue|monohydroxylated residue|acetylated residue	Q Exactive	Technical
	PXD002029	Comparative proteome stability analysis of snap frozen, RNAlater preserved, and formalin-fixed paraffin-embedded human colon mucosal biopsies	Clinical proteomics research is in part limited by the availabil	2015-11-23	PARTIAL	Homo sapiens (Human)	colonic mucosa|colon sigmoideum	iodoacetamide derivatized residue	Q Exactive	Biomedical
	PXD002137	Proteome Landscapes of the Human Colorectal Mucosa, and its Adenoma and Cancer	Adenomatous polyps in the colorectal tract are benign tumors wit	2015-08-10	PARTIAL	Homo sapiens (Human)	colon	No PTMs are included in the dataset	Q Exactive	Biomedical
	PXD000987	Membrane proteomis profile along human colon	The colonic epithelium is a highly dynamic system important for	2014-07-31	PARTIAL	Homo sapiens (Human)	colon	iodoacetamide derivatized residue|monohydroxylated residue	LTQ Orbitrap	Biomedical
	PXD001608	Human colon biopsies (healthy and Ulcerative Colitis) LC-MS/MS	The etiology of the inflammatory bowel diseases, including ulcer	2015-05-26	PARTIAL	Homo sapiens (Human)	colonic mucosa|colon sigmoideum	iodoacetamide derivatized residue	Q Exactive
	PXD004435	Transcription factor-SNP interactome for colorectal cancer risk loci	A core task to understand the consequences of non-coding single	2017-02-23	PARTIAL	Homo sapiens (Human)	colon	iodoacetamide derivatized residue|2x(13)C|monohydroxylated residue|acetylated residue	Q Exactive	Biological|Biomedical
	PXD003082	A proteome analysis by LC-MS/MS of human colon mucosal biopsies from gastrointestinal healthy rheumatoid arthritis patients	The joint disease rheumatoid arthritis (RA) is characterized by	2016-09-26	PARTIAL	Homo sapiens (Human)	colonic mucosa|colon sigmoideum	iodoacetamide derivatized residue	Q Exactive	Biomedical
	PXD006486	Identification of differentially expressed splice variants by the proteogenomic pipeline SPLICIFY	Proteogenomics, i.e. comprehensive integration of genomics and p	2017-07-28	PARTIAL	Homo sapiens (Human)	colon	iodoacetamide derivatized residue|monohydroxylated residue|acetylated residue	Q Exactive	Technical|Biomedical
	PXD005354	Pharmacoproteomic characterisation of human colon and rectal cancer - CRC65 Full Proteomes	Most molecular cancer therapies act on protein targets but data	2017-12-12	PARTIAL	Homo sapiens (Human)	colonic cancer cell line|rectal cancer cell line	iodoacetamide derivatized residue|monohydroxylated residue|acetylated residue	LTQ Orbitrap Velos	Biomedical
	PXD005353	Pharmacoproteomic characterisation of human colon and rectal cancer - CPTAC Full Proteomes	Most molecular cancer therapies act on protein targets but data	2017-12-13	PARTIAL	Homo sapiens (Human)	rectal cancer cell|colonic cancer cell	iodoacetamide derivatized residue|monohydroxylated residue|acetylated residue	LTQ Orbitrap Velos	Biomedical
	PXD006575	Specific labeling of stem cell activity in human colorectal organoids_x000D_ using an ASCL2-responsive minigene	Organoid technology provides the possibility to culture human co	2018-01-29	PARTIAL	Homo sapiens (Human)	colon	dimethylated residue|iodoacetamide derivatized amino-terminal residue	Orbitrap Fusion	Biological|Biomedical
	PXD009450	Functional Proteomic Profiling of Secreted Serine Proteases in Health and Inflammatory Bowel Disease	Dysregulated proteolysis plays a pivotal role in the pathophysio	2018-05-18	PARTIAL	Homo sapiens (Human)	colon	iodoacetamide derivatized residue|monohydroxylated residue|acetylated residue	LTQ Orbitrap Velos	Biomedical
	PXD007740	A system-wide approach to monitor responses to synergistic BRAF and EGFR inhibition in colorectal cancer cells	Molecular heterogeneity of tumors, epigenetic changes and a dive	2018-07-16	PARTIAL	Homo sapiens (Human)	colon	phosphorylated residue	Q Exactive	Biomedical
	PXD007271	Co-immumnoprecipitation experiments to identify protein bindining partners of CSDE1	While the transcriptional network of human embryonic stem cells	2018-05-15	PARTIAL	Homo sapiens (Human)	embryo	No PTMs are included in the dataset	Q Exactive	Biological
	PXD007270	A post-transcriptional program coordinated by CSDE1 prevents intrinsic neural differentiation of human embryonic stem cells	While the transcriptional network of human embryonic stem cells	2018-05-16	PARTIAL	Homo sapiens (Human)	embryo	No PTMs are included in the dataset	Q Exactive	Biological
	PXD006675	Region and cell-type resolved quantitative proteomic map of the human heart and its application to atrial fibrillation	The heart is a central human organ and its diseases are the lead	2017-11-14	PARTIAL	Homo sapiens (Human)	heart	No PTMs are included in the dataset	Q Exactive	Biological|Biomedical
	PXD005736	Proteomic Analysis of Human Cardiac Organoids	The mammalian heart undergoes major transitions during postnatal	2017-11-21	PARTIAL	Homo sapiens (Human)	heart	iodoacetamide derivatized residue|monohydroxylated residue	Q Exactive	Biological
	PXD008934	Characterization of proteomic changes in human heart failure	The microtubule (MT) cytoskeleton can provide a mechanical resis	2018-06-06	PARTIAL	Homo sapiens (Human)	heart	No PTMs are included in the dataset	Q Exactive	Biomedical
	PXD001769	A Circular RNA Controls Ribosomal RNA Maturation and Atherosclerosis in Humans	Circular RNAs (circRNAs) are broadly expressed in eukaryotic cel	2016-06-10	PARTIAL	Homo sapiens (Human)	smooth muscle cell|heart	No PTMs are included in the dataset	Q Exactive	Biomedical
	PXD001061	Uncovering Global SUMOylation Signaling Networks in a Site-Specific Manner	SUMOylation is a reversible post-translational modification esse	2014-09-04	PARTIAL	Homo sapiens (Human)	HeLa cell	sumoylated lysine	Q Exactive	Biological
	PXD004273	LFQ comparison of total cell lysate, lysosomal and plasma membrane fraction of WT and NPC1 KO cells	Superparamagnetic iron oxide nanoparticles (SPIONs) have so far	2017-02-01	PARTIAL	Homo sapiens (Human)	HeLa cell	No PTMs are included in the dataset	Q Exactive HF	Biology/Disease-Driven Human Proteome Project (B/D-HPP)|Biological|Human Proteome Project
	PXD006390	EGF-dependent ubiquitinome, phosphorylation and interactome analysis in control and CYLD-deficient cells	Cylindromatosis tumor suppressor protein (CYLD) is deubiquitinas	2017-06-05	PARTIAL	Homo sapiens (Human)	HeLa cell	phosphorylated residue	Q Exactive HF	Biological
	PXD005005	Split-BioID	Split-BioID: a conditional proteomics approach for high resoluti	2017-06-01	PARTIAL	Homo sapiens (Human)	HeLa cell	biotinylated residue	LTQ Orbitrap Velos	Technical
	PXD001660	Histone deacetylase inhibitors cause the selective depletion of bromodomain containing proteins	Histone deacetylases (HDACs) and acetyltransferases control the	2015-03-18	PARTIAL	Homo sapiens (Human)	HeLa cell	iodoacetamide derivatized residue	LTQ Orbitrap Velos	Biological|Biomedical
	PXD008399	Direct identification of protein S-palmitoylation sites	S-fatty-acylation is the covalent attachment of long chain fatty	2018-03-28	PARTIAL	Homo sapiens (Human)	HeLa cell	palmitoylated residue	Q Exactive	Biological
	PXD009339	Short-term remodeling of the host epithelial cell proteome by the listeriolysin O pore-forming toxin	Bacterial pathogens use various strategies to interfere with hos	2018-05-17	PARTIAL	Homo sapiens (Human)	HeLa cell	iodoacetamide derivatized residue|monohydroxylated residue|acetylated residue	LTQ Orbitrap Velos|Q Exactive HF	Biomedical
	PXD002103	FIH regulates cellular metabolism through hydroxylation of the deubiquitinase OTUB1.	The asparagine hydroxylase, factor inhibiting HIF (FIH) confers	2016-01-11	PARTIAL	Homo sapiens (Human)	kidney	monohydroxylated residue	Q Exactive	Biological|Biomedical
	PXD003134	HEK293 Quality Control example dataset - contamination test	A simple HEK293 lysate, with two files containing a putative myc	2015-11-04	PARTIAL	Homo sapiens (Human)	kidney	iodoacetamide derivatized residue|monohydroxylated residue	LTQ Orbitrap Velos	Technical
	PXD003133	HEK293 Quality Control example dataset	A simple HEK293 lysate, which can be used to benchmark the perfo	2015-11-02	PARTIAL	Homo sapiens (Human)	kidney	iodoacetamide derivatized residue|monohydroxylated residue	LTQ Orbitrap Velos	Technical
	PXD001224	A High-resolution Systems-wide Screen for Substrates of the SCFë?TrCP Ubiquitin Ligase - reproducibility evaluation	This project demonstrates a combined bioinformatics and affinity	2015-01-06	PARTIAL	Homo sapiens (Human)	kidney	iodoacetamide derivatized residue|monohydroxylated residue|acetylated residue	LTQ Orbitrap	PRIME-XS Project|Biological
	PXD001088	A High-resolution Systems-wide Screen for Substrates of the SCFë?TrCP Ubiquitin Ligase	This project demonstrates a combined bioinformatics and affinity	2015-01-06	PARTIAL	Homo sapiens (Human)	kidney	iodoacetamide derivatized residue|monohydroxylated residue|acetylated residue	LTQ Orbitrap Elite	PRIME-XS Project|Biological
	PXD003872	Response of podocytes to PAN	Podocytes are terminally differentiated cells at the kidney filt	2017-04-19	PARTIAL	Homo sapiens (Human)	kidney	No PTMs are included in the dataset	Q Exactive	Biological
	PXD007075	Deep proteomic mapping of the human podocyte proteome	We subjected differentiated and undifferentiated podocytes to de	2018-05-01	PARTIAL	Homo sapiens (Human)	kidney	No PTMs are included in the dataset	Q Exactive	Biological
	PXD008171	Polylysine interactome in human cells	Polylysine chains are synthesized by ribosomes when a stop codon	2018-04-26	PARTIAL	Homo sapiens (Human)	kidney	No PTMs are included in the dataset	Q Exactive	Biological
	PXD006522	Analysis of single human glomeruli of a patient with NPHS1 mutation - part 2	We analyzed the proteome of single human glomeruli obtained by s	2018-06-28	PARTIAL	Homo sapiens (Human)	kidney	No PTMs are included in the dataset	Q Exactive	Biological
	PXD006517	Analysis of human glomeruli of a patient with NPHS1 mutation - part 1	We analyzed the proteome of glomeruli obtained by sieving.	2018-06-28	PARTIAL	Homo sapiens (Human)	kidney	No PTMs are included in the dataset	Q Exactive	Biological
	PXD001874	Human Hepatocyte Proteome	Here we report a comprehensive proteomic analysis of purified hu	2016-01-26	PARTIAL	Homo sapiens (Human)	liver	No PTMs are included in the dataset	Q Exactive	Biological
	PXD002235	Comparative proteomic analysis of human liver tissue and isolated hepatocytes with a focus on proteins determining drug exposure	Freshly isolated human hepatocytes are considered the gold stand	2015-07-16	PARTIAL	Homo sapiens (Human)	liver	No PTMs are included in the dataset	LTQ Orbitrap Velos	Biomedical
	PXD001352	Absolute protein quantification allows differentiation of cell specific metabolic routes and functions	Total protein approach (TPA) is a proteomic method which allows	2014-12-15	PARTIAL	Homo sapiens (Human)|Mus musculus (Mouse)	liver|brain|small intestine mucosa|erythrocyte	phosphorylated residue|acetylated residue	Q Exactive	Biological
	PXD001889	Global proteome changes in liver tissue 6 weeks after FOLFOX treatment of colorectal cancer liver metastases.	Study: Oxaliplatin-based chemotherapy for colorectal liver metas	2016-12-14	PARTIAL	Homo sapiens (Human)	liver	No PTMs are included in the dataset	Q Exactive	Biological
	PXD008190	Comparison of Protein Expressions of Drug-Metabolizing Enzymes between Human Liver and the Hepatic Cell Lines HepG2, Hep3B and Huh7 using SWATH and MRM-HR Proteomics	Human hepatic cell lines have been widely used as an in vitro mo	2018-04-18	PARTIAL	Homo sapiens (Human)	cell culture|liver	iodoacetamide derivatized residue|monohydroxylated residue	TripleTOF 5600	Biomedical
	PXD003458	Quantitative Analysis of of Human Liver	Large scale proteomic analysis of human liver from 10 donors	2018-04-23	PARTIAL	Homo sapiens (Human)	liver	No PTMs are included in the dataset	Q Exactive	Biological
	PXD003646	Inflammatory signaling in human Tuberculosis granulomas is spatially organized	Granulomas are the pathological hallmark of tuberculosis (TB). H	2016-02-26	PARTIAL	Homo sapiens (Human)	lung	No PTMs are included in the dataset	Q Exactive	Biomedical
	PXD000853	Profiling of human lung tissues on 11 normal control, 11 patient and 11 corresponding mouse xenograft tumours	The total protein expression level of 11 paired human normal, h	2014-12-04	PARTIAL	Homo sapiens (Human)	lung	No PTMs are included in the dataset	LTQ Orbitrap Elite	Biomedical
	PXD009444	A chemical probe to monitor parkinsonism-associated protein DJ-1 in live cells	Oxidative stress is a contingent trigger of Parkinson`s disease	2018-07-17	PARTIAL	Homo sapiens (Human)	lung|HeLa cell|brain	iodoacetamide derivatized residue|6x(13)C labeled residue	LTQ Orbitrap XL|Orbitrap Fusion|Q Exactive	Biomedical
	PXD001533	Integrative analysis of genomics and proteomics data on clinical breast cancer tissue specimens extracted with acid guanidinium thiocyanate-phenol-chloroform	Acid guanidinium thiocyanate, phenol and chloroform extraction (	2016-06-24	PARTIAL	Homo sapiens (Human)	mammary gland	No PTMs are included in the dataset	LTQ Orbitrap|Q Exactive	Technical|Biomedical
	PXD003632	Proteomic characterization of microdissected epithelium, tumor cells, and stroma from breast tissues	Tissue of the breast is heterogeneous, consisting of a variety o	2017-01-11	PARTIAL	Homo sapiens (Human)	mammary gland	No PTMs are included in the dataset	LTQ Orbitrap	Biomedical
	PXD002899	CRM1 Exportome and nucleocytoplasmic partition	CRM1 mediates one of the major nuclear export pathways with the	2016-01-04	PARTIAL	Homo sapiens (Human)|Xenopus laevis (African clawed frog)|Saccharomyces cerevisiae (Baker's yeast)		iodoacetamide derivatized residue|monohydroxylated residue|acetylated residue	Q Exactive	Biological
	PXD002635	Evaluation of of kinase acitivity profiling using chemical proteomics	Evaluation of kinase binding to immobilized inhibitors upon kin	2016-01-04	PARTIAL	Homo sapiens (Human)		phosphorylated residue	LTQ Orbitrap Elite|Q Exactive	Technical|Biological
	PXD000895	Human hnRNP H1 knockdown proteomics	HNRNP1 was characterized in a multi-dimensional study involving	2016-01-25	PARTIAL	Homo sapiens (Human)		iodoacetamide derivatized residue	LTQ Orbitrap Velos	Biological
	PXD001085	PHD3 and FIH substrates cluster in distinct signalling pathways	Amino acid hydroxylation is a common post-translational modifica	2016-03-30	PARTIAL	Homo sapiens (Human)		monohydroxylated residue|carbamoylated residue|acetylated residue	Q Exactive	Biomedical
	PXD002408	Quantitative K-GG site analysis	Post-translational modification of proteins by ubiquitin (UQ) an	2016-01-13	PARTIAL	Homo sapiens (Human)		ubiquitinylated lysine	LTQ Orbitrap Velos	Biological
	PXD001610	Proteomic Analysis of the Response to Cell Cycle Arrests in Human Myeloid Leukemia Cells	Previously (Ly et al. 2014), we analyzed protein abundance chang	2015-07-23	PARTIAL	Homo sapiens (Human)		iodoacetamide derivatized residue	Q Exactive	Biomedical
	PXD001192	Regulation of microtubules by DIAPH3 loss influences amoeboid tumor cell sensitivity to taxanes	Diaphanous-related formin-3 (DIAPH3), a cytoskeletal regulator o	2015-07-27	PARTIAL	Homo sapiens (Human)		iodoacetamide derivatized residue|deamidated residue|acetylated residue	LTQ Orbitrap Elite	Biomedical
	PXD000485	Validation dataset on tamoxifen treated Estrogen Receptor (ER) positive breast cancer patients	56 Estrogen Receptor Positive Breast cancer tissues coming from	2015-08-21	PARTIAL	Homo sapiens (Human)		iodoacetamide derivatized residue	LTQ Orbitrap
	PXD000484	Discovery dataset on tamoxifen treated Estrogen Receptor (ER) positive breast cancer patients	56 estrogen receptor positive breast cancer tissues from patient	2015-08-21	PARTIAL	Homo sapiens (Human)		iodoacetamide derivatized residue	LTQ Orbitrap
	PXD000260	Human triple negative breast cancer tissues	Tissue samples were cut into 8-åµm frozen sections and then micro	2014-01-13	PARTIAL	Homo sapiens (Human)		iodoacetamide derivatized residue|monohydroxylated residue|acetylated residue	LTQ Orbitrap
	PXD003550	Proteome analysis of adipose-derived stem cells cultured under clinically relevant conditions in a wound healing perspective	There is a large body of evidence supporting the beneficial role	2016-04-18	PARTIAL	Homo sapiens (Human)		iodoacetamide derivatized residue	Q Exactive	Biomedical
	PXD002839	Nuclear phosphoproteomics analysis of resting and IL-2-stimulated T lymphocytes	The aim of the present project was to study in detail the site-s	2016-04-18	PARTIAL	Homo sapiens (Human)		phosphorylated residue	Q Exactive	Biological
	PXD003554	Nuclear nucleolin interactome analysis	Nucleolin (NCL) is a major component of the cell nucleolus, whic	2016-04-11	PARTIAL	Homo sapiens (Human)		iodoacetamide derivatized residue|monohydroxylated residue|acetylated residue	LTQ Orbitrap Velos	Biological
	PXD003279	Analysis of the MAGED2 interactome	The MAGED2 interactome was analyzed in HEK293T cells using three	2016-05-02	PARTIAL	Homo sapiens (Human)		No PTMs are included in the dataset	Q Exactive	Biological
	PXD000448	E-cadherin interactome complexity and robustness resolved by quantitative proteomics	E-cadherin-mediated cell-cell adhesion and signaling plays an es	2016-07-06	PARTIAL	Homo sapiens (Human)		iodoacetamide derivatized residue	LTQ Orbitrap Elite
	PXD000496	Proteomics of TGF beta signaling	HaCaT cells were treated with TGF beta1 for different time point	2014-07-01	PARTIAL	Homo sapiens (Human)		phosphorylated residue	Q Exactive	Biomedical
	PXD001220	Characterization of native protein complexes and protein isoform variation using size-fractionation-based quantitative proteomics.	Proteins form a diverse array of complexes that mediate cellular	2014-08-14	PARTIAL	Homo sapiens (Human)		oxidized residue|N-acylated residue|2-pyrrolidone-5-carboxylic acid (Gln)	LTQ Orbitrap Velos	Biomedical
	PXD000386	Extracellular Matrix Proteome	A major obstacle in defining the exact role of extracellular mat	2013-09-11	PARTIAL	Homo sapiens (Human)		iodoacetamide derivatized residue|deaminated residue|monohydroxylated residue|acetylated residue	LTQ Orbitrap
	PXD000194	Proteomics analysis of human pericardial fluid	Pericardial fluid (PF) is considered as biochemical window of he	2013-07-08	PARTIAL	Homo sapiens (Human)		iodoacetamide derivatized residue|monohydroxylated residue|N-acetylated residue	LTQ Orbitrap Velos	Cardiovascular
	PXD000608	Proteomics of cerebrospinal fluid microvesicles	Comprehensive proteomic dataset of cerebrospinal fluid (CSF) mic	2014-05-06	PARTIAL	Homo sapiens (Human)		iodoacetamide derivatized residue|monohydroxylated residue|acetylated residue	Q Exactive
	PXD002286	Phospo-proteomic profiling of Castration Resistant Prostate Cancer	The integration of diverse ‰Û÷omic‰Ûª datasets will increase our und	2016-08-19	PARTIAL	Homo sapiens (Human)		phosphorylated residue	Q Exactive	Biomedical
	PXD003606	Proteomics characterization of VPCs	hESCs were differentiated into vascular progenitor cells, using	2016-09-28	PARTIAL	Homo sapiens (Human)		iodoacetamide derivatized residue|monohydroxylated residue|acetylated residue	Q Exactive	Biological|Biomedical
	PXD003822	Human AML patient samples, Method Optimization, LC-MSMS	We evaluated different in-solution and filter-aided sample prepa	2016-04-26	PARTIAL	Homo sapiens (Human)		iodoacetamide derivatized residue|phosphorylated residue|6x(13)C,2x(15)N labeled L-lysine|monohydroxylated residue|acetylated residue|6x(13)C labeled L-arginine	LTQ Orbitrap Elite	Technical|Biomedical
	PXD002269	ER stress response in hepatocytes upon Plasmodium infection	Upon infection of a mammalian host, Plasmodium parasites first r	2016-04-20	PARTIAL	Homo sapiens (Human)		No PTMs are included in the dataset	LTQ Orbitrap	Biomedical
	PXD000278	Quantitative proteomic analysis of breast cancer tissues	We compared label-free and SILAC based quantative methods in com	2013-08-22	PARTIAL	Homo sapiens (Human)		iodoacetamide derivatized residue|monohydroxylated residue|acetylated residue	LTQ Orbitrap
	PXD000661	A ‰Û÷proteomic ruler‰Ûª for protein copy number and concentration estimation without spike-in standards	Absolute protein quantification using mass spectrometry (MS)-bas	2014-09-16	PARTIAL	Homo sapiens (Human)|Mus musculus (Mouse)		iodoacetamide derivatized residue|monohydroxylated residue|acetylated residue	LTQ Orbitrap|LTQ Orbitrap Velos|Q Exactive	Technical|Highlighted
	PXD000394	Mass spectrometry of HLA-I peptidomes reveals strong effects of protein abundance and turnover on antigen presentation	HLA class I molecules reflect the health state of cells to cytot	2015-01-12	PARTIAL	Homo sapiens (Human)		No PTMs are included in the dataset	Q Exactive	Human Immuno-Peptidome Project (HUPO-HIPP)|Biology/Disease-Driven Human Proteome Project (B/D-HPP)|Biological|Human Proteome Project|Biomedical
	PXD005402	Use of a modified Multiplexed Inhibitor Bead assay to study kinome responses to cytostatic treatment in human cancer cell lines Triplicate Test: pilot study	In order to improve elution of proteins from the column, to redu	2017-02-13	PARTIAL	Homo sapiens (Human)		No PTMs are included in the dataset	Q Exactive	Biomedical
	PXD006112	Improved reversed phase chromatography of hydrophilic peptides from spatial and temporal changes in column temperature	Reversed phase chromatography is an established method for pepti	2017-04-10	PARTIAL	Homo sapiens (Human)|Bos taurus (Bovine)		modified L-aspartic acid residue|iodoacetamide derivatized residue|monohydroxylated residue|acetylated residue	Q Exactive	Technical
	PXD006074	ZBTB48 is both a vertebrate telomere-binding protein and a transcriptional activator	Telomeres constitute the ends of linear chromosomes and together	2017-05-11	PARTIAL	Homo sapiens (Human)		No PTMs are included in the dataset	Q Exactive	Biological
	PXD001205	Different Binding Motifs of the Celiac Disease Associated HLA Molecules DQ2.5, DQ2.2 and DQ7.5 Revealed by Relative Quantitative Proteomics of Endogenous Peptide Repertoires	In this study relative quantitative analysis of endogenous pepti	2014-12-04	PARTIAL	Homo sapiens (Human)		No PTMs are included in the dataset	Q Exactive	Biology/Disease-Driven Human Proteome Project (B/D-HPP)|Human Proteome Project|Biomedical
	PXD003903	HipSci project pilot submission for 18 IPS cell lines	The Human Induced Pluripotent Stem Cells Initiative (HipSci) is	2016-06-06	PARTIAL	Homo sapiens (Human)		methylated lysine|oxidized residue|phosphorylated residue|Acetyl|N-acylated residue|deamidated residue|S-carboxamidomethyl-L-cysteine	Q Exactive	Biological|Biomedical
	PXD005191	DDX54 regulates transcriptome dynamics during DNA damage response, DDX54 BioID	The cellular response to genotoxic stress is a well-characterize	2017-06-12	PARTIAL	Homo sapiens (Human)		iodoacetamide derivatized residue|monohydroxylated residue	Q Exactive	Biological|Biomedical
	PXD007733	Converging SUMO and ubiquitin signaling: improved methodology identifies co-modified target proteins	Post translational protein modifications (PTMs) including small	2017-09-29	PARTIAL	Homo sapiens (Human)		monohydroxylated residue|acetylated residue	Q Exactive	Technical|Biological
	PXD004363	Non-pregnant CVF protome and peptidome	Cervical-vaginal fluid (CVF) covers the lower part of the female	2017-09-27	PARTIAL	Homo sapiens (Human)		iodoacetamide derivatized residue	Q Exactive	Biological|Biomedical
	PXD005903	Integrated lysine acetylation stoichiometry and proteomics analysis in human cells	Lysine acetylation is a widespread posttranslational modificatio	2017-09-12	PARTIAL	Homo sapiens (Human)		iodoacetamide derivatized residue|acetylated residue	Q Exactive
	PXD001186	A role for CPT1A to prevent blood vessel permeability revealed by in depth proteomics	Endothelial cells (ECs) line the inner wall of blood vessels and	2015-01-28	PARTIAL	Homo sapiens (Human)		phosphorylated residue	LTQ Orbitrap Elite	Biomedical
	PXD006280	The nuclear receptor ERbeta engages AGO2 in regulation of gene transcription, RNA splicing and RISC loading	Background: The RNA-binding protein Argonaute 2 (AGO2) is a key	2017-09-20	PARTIAL	Homo sapiens (Human)		No PTMs are included in the dataset	Q Exactive	Biomedical
	PXD008686	The MYO6 interactome using BioID	The intracellular function of myosin motors requires a number of	2018-02-27	PARTIAL	Homo sapiens (Human)		iodoacetamide derivatized residue|acetylated residue	Q Exactive	Biological
	PXD008606	BCL11B_AP-MS	This study investigates whether the N-terminal CCHC zinc finger	2018-01-12	PARTIAL	Homo sapiens (Human)		iodoacetamide derivatized residue|monohydroxylated residue	TSQ Vantage|Q Exactive	Cancer (B/D-HPP)|Biology/Disease-Driven Human Proteome Project (B/D-HPP)|Human Proteome Project|Biological
	PXD007686	Comparative proteomics of dying and surviving cancer cells improves the identification of drug targets and sheds light on cell life/death decisions	Chemotherapeutics cause the detachment and death of adherent can	2018-03-28	PARTIAL	Homo sapiens (Human)		No PTMs are included in the dataset	Q Exactive	Biological|Biomedical
	PXD006720	Unliganded Estrogen Receptor beta (ERë?) interactome before and after RNAse treatment in human breast cancer cells nuclei.	The Estrogen Receptor beta (ERë?), is a member of the nuclear rec	2017-12-19	PARTIAL	Homo sapiens (Human)		No PTMs are included in the dataset	Q Exactive	Biomedical
	PXD007244	Effect of rRNA methylation defect on protein composition of human ribosomes	Ribosomal RNAs (rRNAs) are main effectors of mRNA decoding, pept	2018-04-09	PARTIAL	Homo sapiens (Human)		iodoacetamide derivatized residue|monohydroxylated residue|acetylated residue	LTQ Orbitrap Velos	Biological
	PXD006892	Aurora A kinase phosphorylates Hec1 to regulate metaphase kinetochore-microtubule dynamics.	Precise regulation of kinetochore-microtubules is essential for	2017-11-28	PARTIAL	Homo sapiens (Human)		iodoacetamide derivatized residue|monohydroxylated residue	LTQ Orbitrap Velos	Biological
	PXD007596	MHC peptides presentation is limited by availability of empty HLA molecules rather than the supply of peptides ligands	Whether the presentation levels of the major histocompatibility	2018-05-10	PARTIAL	Homo sapiens (Human)		iodoacetamide derivatized residue|monohydroxylated residue|acetylated residue	LTQ Orbitrap|Q Exactive	Biological|Biomedical
	PXD006939	High-throughput MS-based immunopeptidomics	Comprehensive knowledge of the HLA class-I and class-II peptides	2017-12-15	PARTIAL	Homo sapiens (Human)		No PTMs are included in the dataset	Q Exactive
	PXD007679	Allele-specific alterations in the peptidome underlie the joint association of HLA-A*29:02 and Endoplasmic Reticulum Aminopeptidase 2 (ERAP2) with Birdshot Chorioretinopathy	Birdshot chorioretinopathy (BSCR) is a rare inflammatory eye dis	2018-05-17	PARTIAL	Homo sapiens (Human)		monohydroxylated residue|acetylated residue	Q Exactive	Biomedical
	PXD009142	Generation and Proteome Profiling of PBMC-originated, iPSCs-derived Corneal Endothelial Cells	Corneal endothelial cells (CECs) are critical to maintaining cla	2018-06-06	PARTIAL	Homo sapiens (Human)		iodoacetamide derivatized residue|acetylated residue	LTQ Orbitrap Elite	Biomedical
	PXD008713	Rapid proteomic workflow for solid tumors reveals LSD1 as a drug target in an end stage cancer patient	Recent advances in mass spectrometry (MS)-based technologies are	2018-06-15	PARTIAL	Homo sapiens (Human)		No PTMs are included in the dataset	LTQ Orbitrap	Biomedical
	PXD008260	A U1-70K Protein Interaction Network Reveals a Functional Class of RNA Binding Proteins with Mixed Charge Domains	U1 small nuclear ribonucleoprotein 70 kDa (U1-70K) and other pro	2018-06-21	PARTIAL	Homo sapiens (Human)		iodoacetamide derivatized residue|monohydroxylated residue	Q Exactive	Biological
	PXD008918	Proteomics analysis of monocyte-derived hepatocyte-like cells identifies integrin beta 3 as a specific biomarker for drug-induced liver injury by diclofenac	Idiosyncratic drug-induced liver injury (iDILI) is a major cause	2018-07-23	PARTIAL	Homo sapiens (Human)		No PTMs are included in the dataset	Q Exactive	Biomedical
	PXD009895	METTL13 modulates mRNA translation through methylation of eEF1A at Lys55 and the N-terminus	The experiment aimed at identifying lysine methylation dependent	2018-07-04	PARTIAL	Homo sapiens (Human)		No PTMs are included in the dataset	Q Exactive HF-X	Biological
	PXD007569	Human islet of Langerhans grown on nanosubstrates LC-MSMS	Intensive efforts are focused on identifying regulators of human	2018-07-11	PARTIAL	Homo sapiens (Human)		iodoacetic acid derivatized residue|L-methionine sulfoxide|phosphorylated residue	LTQ Orbitrap Velos	Biological
	PXD010393	A novel LC system embeds analytes in pre-formed gradients for rapid, ultra-robust proteomics	To further integrate mass spectrometry (MS)-based proteomics int	2018-08-16	PARTIAL	Homo sapiens (Human)		No PTMs are included in the dataset	Q Exactive	Technical
	PXD006891	Human adipose insulin resistance	Adipocytes play a major role in whole body fuel homeostasis. Int	2018-02-09	PARTIAL	Homo sapiens (Human)	adipose tissue	No PTMs are included in the dataset	Q Exactive	Biomedical
	PXD004859	Anal Canal Cancer : subclassification	Etiologically linked to HPV infection, malignancies of the anal	2016-12-20	PARTIAL	Homo sapiens (Human)	anal canal	iodoacetamide derivatized residue|monohydroxylated residue|deamidated residue	Q Exactive	Biological|Biomedical
	PXD004420	Proteome profiling of blood plasma-derived exosomes in chronic lymphocytic leukemia	In order to analyze differences in the proteome composition of b	2017-08-09	PARTIAL	Homo sapiens (Human)	B-lymphoma cell line	No PTMs are included in the dataset	LTQ Orbitrap XL	Biomedical
	PXD008302	Quantitative Proteomic Analysis of Pancreatic Cyst Fluid Proteins Associated with Malignancy in Intraductal Papillary Mucinous Neoplasms	Intraductal papillary mucinous neoplasm (IPMN) is a benign tumor	2018-05-01	PARTIAL	Homo sapiens (Human)	cyst	iodoacetamide derivatized residue|monohydroxylated residue|acetylated residue	Q Exactive	Biomedical
	PXD005200	Comprehensive and at copy number resolution analysis of the red blood cells proteome unravels unexpected membrane transporters	Red blood cells (RBC) are the most abundant cell type in human b	2017-08-11	PARTIAL	Homo sapiens (Human)	erythrocyte	phosphorylated residue	Q Exactive	Biological
	PXD001025	Basement Membranes from Human Retinal Blood Vessels, Inner Limiting Membranes, and Lens Capsules	Three types of BMs from adult human eyes, the inner limiting mem	2014-07-16	PARTIAL	Homo sapiens (Human)	eye	iodoacetamide derivatized residue|monohydroxylated residue	LTQ Orbitrap Velos	Biomedical
	PXD005833	The Proteomic Fingerprint of Prostate Cancer in Primary Tumors and Recurrent Lymph Node Metastases	We performed a quantitative proteome comparison on formalin-fixe	2017-12-19	PARTIAL	Homo sapiens (Human)	lymph node|prostate gland	iodoacetamide derivatized residue	Q Exactive	Biomedical
	PXD007048	Cell-specific proteome analyses of human bone marrow upon aging.	Diminishing potential to replace damaged tissues is a hallmark f	2018-07-20	PARTIAL	Homo sapiens (Human)	mesenchymal stem cell|haematopoietic stem cells|bone marrow stromal stem cell	No PTMs are included in the dataset	LTQ Orbitrap Velos	Biological
	PXD009393	Proteome analysis of microvessels from CADASIL patients	CADASIL, the most frequent and intensely studied monogenic SVD,	2018-08-03	PARTIAL	Homo sapiens (Human)	microvessel	iodoacetamide derivatized residue|monohydroxylated residue|acetylated residue	Q Exactive	Biological
	PXD006332	HIV-Tat treatment of human neurons in vitro over time: towards a model for the molecular pathology of HIV-associated neurocognitive disorders (~70% cell culture confluence dataset)	We have used LC-MSMS discovery proteomics to identify the quanti	2017-05-19	PARTIAL	Homo sapiens (Human)	cell culture|neural stem cell line	No PTMs are included in the dataset	Q Exactive	Biomedical
	PXD004142	Human oocyte proteome and secretome	The proteome and secretome of human oocytes was studied by shotg	2016-06-01	PARTIAL	Homo sapiens (Human)	oocyte	iodoacetamide derivatized residue	LTQ Orbitrap Velos	Technical|Biological
	PXD006563	Analysis of extracellular matrix proteins from 3D cultures of primary prostate fibroblasts, DU145 cells and mixed cells	Composition and organization of extracellular matrix (ECM) in tu	2018-03-13	PARTIAL	Homo sapiens (Human)	cell culture|prostate cancer cell line	iodoacetamide derivatized residue|monohydroxylated residue	Q Exactive	Biomedical
	PXD003028	Ultra-deep and quantitative saliva proteome reveals dynamics of the oral microbiome	The oral cavity is home to one of the most diverse microbial com	2016-03-18	PARTIAL	Homo sapiens (Human)	saliva	No PTMs are included in the dataset	Q Exactive	Biological
	PXD006182	Single muscle fiber proteomics reveals fiber type-specific features of human muscle aging	Skeletal muscle is a key tissue in human aging, which affects di	2017-06-14	PARTIAL	Homo sapiens (Human)	skeletal muscle fiber	No PTMs are included in the dataset	Q Exactive	Biological
	PXD008533	Defining targets of the bacterial ADP-ribosyltransferase EspJ	Tyrosine phosphorylation is key for signal transduction from exo	2018-03-16	PARTIAL	Homo sapiens (Human)	tissue culture	No PTMs are included in the dataset	Q Exactive	Biological
	PXD006805	In-depth protein profiling of cytology samples in urothelial carcinoma	Urine cytologic examination is a widely used primary pathologic	2018-07-04	PARTIAL	Homo sapiens (Human)	urinary bladder	No PTMs are included in the dataset	Q Exactive	Biomedical
	PXD002686	Short Term Immune Response to IL6 inhibition (Tocilizumab)	we examined the effects of IL6 inhibition treatment on biologic	2016-01-05	PARTIAL	Homo sapiens (Human)	primary cell	iodoacetamide derivatized residue	Q Exactive	Biomedical
	PXD004117	Proteomic analysis of the extracellular and intracellular role of IL-33 in primary human endothelial cells	IL-33 is a nuclear cytokine from the IL-1 family that plays impo	2016-10-10	PARTIAL	Homo sapiens (Human)	primary cell	iodoacetamide derivatized residue|monohydroxylated residue	LTQ Orbitrap Velos	Biological
	PXD004141	Proteomic analysis of the extracellular and intracellular role of IL-33 in primary human endothelial cells (IL-33 knockdown by siRNA)	IL-33 is a nuclear cytokine from the IL-1 family that plays impo	2016-10-12	PARTIAL	Homo sapiens (Human)	primary cell	iodoacetamide derivatized residue|monohydroxylated residue	LTQ Orbitrap Velos	Biological|Biomedical
	PXD008361	Preservation methods and PBS washing affect the AML proteome	In the current study, we have studied the effect of three storag	2018-01-19	PARTIAL	Homo sapiens (Human)	primary cell|cell suspension culture	iodoacetamide derivatized residue|monohydroxylated residue|acetylated residue	LTQ Orbitrap Elite|Q Exactive	Technical
	PXD005944	On-bead vs FASP vs InGel sample preparation for LC-MS/MS	The aim of this project was to compare and optimize sample proce	2018-07-19	PARTIAL	Homo sapiens (Human)	JURKAT cell	No PTMs are included in the dataset	Q Exactive	Technical
	PXD006299	Characterisation of protein ubiquitination using UbiSite technology	We present a novel immune-affinity-based method UbiSite for capt	2018-07-03	PARTIAL	Homo sapiens (Human)	HEp-2 cell|JURKAT cell	ubiquitination signature dipeptidyl lysine|phosphorylated residue|monohydroxylated residue|acetylated residue	Q Exactive HF	Technical|Biological
	PXD004315	Comprehensive proteomic analysis of human erythropoiesis - experiment 3 over 4	We performed a proteomic analysis of human erythropoiesis using	2016-08-08	PARTIAL	Homo sapiens (Human)	umbilical cord blood cell	iodoacetamide derivatized residue|monohydroxylated residue|acetylated residue	Q Exactive
	PXD004316	Comprehensive proteomic analysis of human erythropoiesis - experiment 4 over 4	We performed a proteomic analysis of human erythropoiesis using	2016-08-08	PARTIAL	Homo sapiens (Human)	umbilical cord blood cell	iodoacetamide derivatized residue|monohydroxylated residue|acetylated residue	Q Exactive
	PXD004314	Comprehensive proteomic analysis of human erythropoiesis - experiment 2	We performed a proteomic analysis of human erythropoiesis using	2016-08-08	PARTIAL	Homo sapiens (Human)	umbilical cord blood cell	iodoacetamide derivatized residue|monohydroxylated residue|acetylated residue	LTQ Orbitrap Velos
	PXD004313	Comprehensive proteomic analysis of human erythropoiesis - experiment1	We performed a proteomic analysis of human erythropoiesis using	2016-08-08	PARTIAL	Homo sapiens (Human)	umbilical cord blood cell	iodoacetamide derivatized residue|monohydroxylated residue|acetylated residue	Q Exactive
	PXD001430	Proteomic analysis of urinary exosomes in cystinuria patients	Cystinuria is a rare renal genetic disease caused by mutations i	2014-11-17	PARTIAL	Homo sapiens (Human)	urine	acetylated residue	LTQ Orbitrap Velos	Biomedical
	PXD003595	Characterization of the human urinary proteome and peptidome	Urine represents an ideal source of clinically relevant biomarke	2016-07-12	PARTIAL	Homo sapiens (Human)	urine	iodoacetamide derivatized residue|monohydroxylated residue|acetylated residue	Q Exactive	Biomedical
	PXD002279	SLC12A3 isoforms in human urine exosomes	The thiazide-sensitive NaCl cotransporter (NCC) is an important	2016-06-14	PARTIAL	Homo sapiens (Human)	urine	iodoacetamide derivatized residue|monohydroxylated residue	Q Exactive	Biomedical
	PXD009784	Changes in the urinary extracellular vesicle proteome are associated with nephronophthisis-related ciliopathies	Nephronophthisis is one of the leading genetic causes of end-sta	2018-08-06	PARTIAL	Homo sapiens (Human)	urine	iodoacetamide derivatized residue|monohydroxylated residue	Q Exactive	Biomedical

## Sheet: Table S1B Interaction Features
	Table S1B. List of Interaction Features
	Listed are interaction features and corresponding literatures
	Feature names	Resources
	Ce_1111_poisson	Wan, C., et al., Panorama of ancient metazoan macromolecular complexes. Nature, 2015. 525(7569): p. 339-44.
	Ce_1111_wcc	Wan, C., et al., Panorama of ancient metazoan macromolecular complexes. Nature, 2015. 525(7569): p. 339-44.
	Ce_1111_apex	Wan, C., et al., Panorama of ancient metazoan macromolecular complexes. Nature, 2015. 525(7569): p. 339-44.
	Ce_1111_pq_euc	Wan, C., et al., Panorama of ancient metazoan macromolecular complexes. Nature, 2015. 525(7569): p. 339-44.
	Ce_6mg_1203_poisson	Wan, C., et al., Panorama of ancient metazoan macromolecular complexes. Nature, 2015. 525(7569): p. 339-44.
	Ce_6mg_1203_wcc	Wan, C., et al., Panorama of ancient metazoan macromolecular complexes. Nature, 2015. 525(7569): p. 339-44.
	Ce_6mg_1203_apex	Wan, C., et al., Panorama of ancient metazoan macromolecular complexes. Nature, 2015. 525(7569): p. 339-44.
	Ce_6mg_1203_pq_euc	Wan, C., et al., Panorama of ancient metazoan macromolecular complexes. Nature, 2015. 525(7569): p. 339-44.
	Ce_BNF_wan_60_1209_poisson	Wan, C., et al., Panorama of ancient metazoan macromolecular complexes. Nature, 2015. 525(7569): p. 339-44.
	Ce_BNF_wan_60_1209_wcc	Wan, C., et al., Panorama of ancient metazoan macromolecular complexes. Nature, 2015. 525(7569): p. 339-44.
	Ce_BNF_wan_60_1209_apex	Wan, C., et al., Panorama of ancient metazoan macromolecular complexes. Nature, 2015. 525(7569): p. 339-44.
	Ce_BNF_wan_60_1209_pq_euc	Wan, C., et al., Panorama of ancient metazoan macromolecular complexes. Nature, 2015. 525(7569): p. 339-44.
	Ce_CRF_wan_60_1209_poisson	Wan, C., et al., Panorama of ancient metazoan macromolecular complexes. Nature, 2015. 525(7569): p. 339-44.
	Ce_CRF_wan_60_1209_wcc	Wan, C., et al., Panorama of ancient metazoan macromolecular complexes. Nature, 2015. 525(7569): p. 339-44.
	Ce_CRF_wan_60_1209_apex	Wan, C., et al., Panorama of ancient metazoan macromolecular complexes. Nature, 2015. 525(7569): p. 339-44.
	Ce_CRF_wan_60_1209_pq_euc	Wan, C., et al., Panorama of ancient metazoan macromolecular complexes. Nature, 2015. 525(7569): p. 339-44.
	Ce_beadsB_wan_60_1208_poisson	Wan, C., et al., Panorama of ancient metazoan macromolecular complexes. Nature, 2015. 525(7569): p. 339-44.
	Ce_beadsB_wan_60_1208_wcc	Wan, C., et al., Panorama of ancient metazoan macromolecular complexes. Nature, 2015. 525(7569): p. 339-44.
	Ce_beadsB_wan_60_1208_apex	Wan, C., et al., Panorama of ancient metazoan macromolecular complexes. Nature, 2015. 525(7569): p. 339-44.
	Ce_beadsB_wan_60_1208_pq_euc	Wan, C., et al., Panorama of ancient metazoan macromolecular complexes. Nature, 2015. 525(7569): p. 339-44.
	Ce_beadsC_wan_60_1209_poisson	Wan, C., et al., Panorama of ancient metazoan macromolecular complexes. Nature, 2015. 525(7569): p. 339-44.
	Ce_beadsC_wan_60_1209_wcc	Wan, C., et al., Panorama of ancient metazoan macromolecular complexes. Nature, 2015. 525(7569): p. 339-44.
	Ce_beadsC_wan_60_1209_apex	Wan, C., et al., Panorama of ancient metazoan macromolecular complexes. Nature, 2015. 525(7569): p. 339-44.
	Ce_beadsC_wan_60_1209_pq_euc	Wan, C., et al., Panorama of ancient metazoan macromolecular complexes. Nature, 2015. 525(7569): p. 339-44.
	Ce_beadsL_1206_poisson	Wan, C., et al., Panorama of ancient metazoan macromolecular complexes. Nature, 2015. 525(7569): p. 339-44.
	Ce_beadsL_1206_wcc	Wan, C., et al., Panorama of ancient metazoan macromolecular complexes. Nature, 2015. 525(7569): p. 339-44.
	Ce_beadsL_1206_apex	Wan, C., et al., Panorama of ancient metazoan macromolecular complexes. Nature, 2015. 525(7569): p. 339-44.
	Ce_beadsL_1206_pq_euc	Wan, C., et al., Panorama of ancient metazoan macromolecular complexes. Nature, 2015. 525(7569): p. 339-44.
	Ce_beadsN_wan_60_1208_poisson	Wan, C., et al., Panorama of ancient metazoan macromolecular complexes. Nature, 2015. 525(7569): p. 339-44.
	Ce_beadsN_wan_60_1208_wcc	Wan, C., et al., Panorama of ancient metazoan macromolecular complexes. Nature, 2015. 525(7569): p. 339-44.
	Ce_beadsN_wan_60_1208_apex	Wan, C., et al., Panorama of ancient metazoan macromolecular complexes. Nature, 2015. 525(7569): p. 339-44.
	Ce_beadsN_wan_60_1208_pq_euc	Wan, C., et al., Panorama of ancient metazoan macromolecular complexes. Nature, 2015. 525(7569): p. 339-44.
	Ce_beadsR_wan_60_1209_poisson	Wan, C., et al., Panorama of ancient metazoan macromolecular complexes. Nature, 2015. 525(7569): p. 339-44.
	Ce_beadsR_wan_60_1209_wcc	Wan, C., et al., Panorama of ancient metazoan macromolecular complexes. Nature, 2015. 525(7569): p. 339-44.
	Ce_beadsR_wan_60_1209_apex	Wan, C., et al., Panorama of ancient metazoan macromolecular complexes. Nature, 2015. 525(7569): p. 339-44.
	Ce_beadsR_wan_60_1209_pq_euc	Wan, C., et al., Panorama of ancient metazoan macromolecular complexes. Nature, 2015. 525(7569): p. 339-44.
	Ce_beadsflow_1206_poisson	Wan, C., et al., Panorama of ancient metazoan macromolecular complexes. Nature, 2015. 525(7569): p. 339-44.
	Ce_beadsflow_1206_wcc	Wan, C., et al., Panorama of ancient metazoan macromolecular complexes. Nature, 2015. 525(7569): p. 339-44.
	Ce_beadsflow_1206_apex	Wan, C., et al., Panorama of ancient metazoan macromolecular complexes. Nature, 2015. 525(7569): p. 339-44.
	Ce_beadsflow_1206_pq_euc	Wan, C., et al., Panorama of ancient metazoan macromolecular complexes. Nature, 2015. 525(7569): p. 339-44.
	Ce_ups_1206_poisson	Wan, C., et al., Panorama of ancient metazoan macromolecular complexes. Nature, 2015. 525(7569): p. 339-44.
	Ce_ups_1206_wcc	Wan, C., et al., Panorama of ancient metazoan macromolecular complexes. Nature, 2015. 525(7569): p. 339-44.
	Ce_ups_1206_apex	Wan, C., et al., Panorama of ancient metazoan macromolecular complexes. Nature, 2015. 525(7569): p. 339-44.
	Ce_ups_1206_pq_euc	Wan, C., et al., Panorama of ancient metazoan macromolecular complexes. Nature, 2015. 525(7569): p. 339-44.
	Dm_1107_DSL2_poisson	Wan, C., et al., Panorama of ancient metazoan macromolecular complexes. Nature, 2015. 525(7569): p. 339-44.
	Dm_1107_DSL2_wcc	Wan, C., et al., Panorama of ancient metazoan macromolecular complexes. Nature, 2015. 525(7569): p. 339-44.
	Dm_1107_DSL2_apex	Wan, C., et al., Panorama of ancient metazoan macromolecular complexes. Nature, 2015. 525(7569): p. 339-44.
	Dm_1107_DSL2_pq_euc	Wan, C., et al., Panorama of ancient metazoan macromolecular complexes. Nature, 2015. 525(7569): p. 339-44.
	Dm_1107_Dem_poisson	Wan, C., et al., Panorama of ancient metazoan macromolecular complexes. Nature, 2015. 525(7569): p. 339-44.
	Dm_1107_Dem_wcc	Wan, C., et al., Panorama of ancient metazoan macromolecular complexes. Nature, 2015. 525(7569): p. 339-44.
	Dm_1107_Dem_apex	Wan, C., et al., Panorama of ancient metazoan macromolecular complexes. Nature, 2015. 525(7569): p. 339-44.
	Dm_1107_Dem_pq_euc	Wan, C., et al., Panorama of ancient metazoan macromolecular complexes. Nature, 2015. 525(7569): p. 339-44.
	Dm_1201_Dem_poisson	Wan, C., et al., Panorama of ancient metazoan macromolecular complexes. Nature, 2015. 525(7569): p. 339-44.
	Dm_1201_Dem_wcc	Wan, C., et al., Panorama of ancient metazoan macromolecular complexes. Nature, 2015. 525(7569): p. 339-44.
	Dm_1201_Dem_apex	Wan, C., et al., Panorama of ancient metazoan macromolecular complexes. Nature, 2015. 525(7569): p. 339-44.
	Dm_1201_Dem_pq_euc	Wan, C., et al., Panorama of ancient metazoan macromolecular complexes. Nature, 2015. 525(7569): p. 339-44.
	Dm_SL2_wan_110_1208_poisson	Wan, C., et al., Panorama of ancient metazoan macromolecular complexes. Nature, 2015. 525(7569): p. 339-44.
	Dm_SL2_wan_110_1208_wcc	Wan, C., et al., Panorama of ancient metazoan macromolecular complexes. Nature, 2015. 525(7569): p. 339-44.
	Dm_SL2_wan_110_1208_apex	Wan, C., et al., Panorama of ancient metazoan macromolecular complexes. Nature, 2015. 525(7569): p. 339-44.
	Dm_SL2_wan_110_1208_pq_euc	Wan, C., et al., Panorama of ancient metazoan macromolecular complexes. Nature, 2015. 525(7569): p. 339-44.
	Hs_CB660_1105_poisson	Wan, C., et al., Panorama of ancient metazoan macromolecular complexes. Nature, 2015. 525(7569): p. 339-44.
	Hs_CB660_1105_wcc	Wan, C., et al., Panorama of ancient metazoan macromolecular complexes. Nature, 2015. 525(7569): p. 339-44.
	Hs_CB660_1105_apex	Wan, C., et al., Panorama of ancient metazoan macromolecular complexes. Nature, 2015. 525(7569): p. 339-44.
	Hs_CB660_1105_pq_euc	Wan, C., et al., Panorama of ancient metazoan macromolecular complexes. Nature, 2015. 525(7569): p. 339-44.
	Hs_G166_1104_poisson	Wan, C., et al., Panorama of ancient metazoan macromolecular complexes. Nature, 2015. 525(7569): p. 339-44.
	Hs_G166_1104_wcc	Wan, C., et al., Panorama of ancient metazoan macromolecular complexes. Nature, 2015. 525(7569): p. 339-44.
	Hs_G166_1104_apex	Wan, C., et al., Panorama of ancient metazoan macromolecular complexes. Nature, 2015. 525(7569): p. 339-44.
	Hs_G166_1104_pq_euc	Wan, C., et al., Panorama of ancient metazoan macromolecular complexes. Nature, 2015. 525(7569): p. 339-44.
	Hs_G166_1105_poisson	Wan, C., et al., Panorama of ancient metazoan macromolecular complexes. Nature, 2015. 525(7569): p. 339-44.
	Hs_G166_1105_wcc	Wan, C., et al., Panorama of ancient metazoan macromolecular complexes. Nature, 2015. 525(7569): p. 339-44.
	Hs_G166_1105_apex	Wan, C., et al., Panorama of ancient metazoan macromolecular complexes. Nature, 2015. 525(7569): p. 339-44.
	Hs_G166_1105_pq_euc	Wan, C., et al., Panorama of ancient metazoan macromolecular complexes. Nature, 2015. 525(7569): p. 339-44.
	Hs_hekN_1108_poisson	Wan, C., et al., Panorama of ancient metazoan macromolecular complexes. Nature, 2015. 525(7569): p. 339-44.
	Hs_hekN_1108_wcc	Wan, C., et al., Panorama of ancient metazoan macromolecular complexes. Nature, 2015. 525(7569): p. 339-44.
	Hs_hekN_1108_apex	Wan, C., et al., Panorama of ancient metazoan macromolecular complexes. Nature, 2015. 525(7569): p. 339-44.
	Hs_hekN_1108_pq_euc	Wan, C., et al., Panorama of ancient metazoan macromolecular complexes. Nature, 2015. 525(7569): p. 339-44.
	Hs_hekN_1201_poisson	Wan, C., et al., Panorama of ancient metazoan macromolecular complexes. Nature, 2015. 525(7569): p. 339-44.
	Hs_hekN_1201_wcc	Wan, C., et al., Panorama of ancient metazoan macromolecular complexes. Nature, 2015. 525(7569): p. 339-44.
	Hs_hekN_1201_apex	Wan, C., et al., Panorama of ancient metazoan macromolecular complexes. Nature, 2015. 525(7569): p. 339-44.
	Hs_hekN_1201_pq_euc	Wan, C., et al., Panorama of ancient metazoan macromolecular complexes. Nature, 2015. 525(7569): p. 339-44.
	Hs_hekN_ph_hcw120_1_poisson	Wan, C., et al., Panorama of ancient metazoan macromolecular complexes. Nature, 2015. 525(7569): p. 339-44.
	Hs_hekN_ph_hcw120_1_wcc	Wan, C., et al., Panorama of ancient metazoan macromolecular complexes. Nature, 2015. 525(7569): p. 339-44.
	Hs_hekN_ph_hcw120_1_apex	Wan, C., et al., Panorama of ancient metazoan macromolecular complexes. Nature, 2015. 525(7569): p. 339-44.
	Hs_hekN_ph_hcw120_1_pq_euc	Wan, C., et al., Panorama of ancient metazoan macromolecular complexes. Nature, 2015. 525(7569): p. 339-44.
	Hs_hekN_ph_hcw120_2_poisson	Wan, C., et al., Panorama of ancient metazoan macromolecular complexes. Nature, 2015. 525(7569): p. 339-44.
	Hs_hekN_ph_hcw120_2_wcc	Wan, C., et al., Panorama of ancient metazoan macromolecular complexes. Nature, 2015. 525(7569): p. 339-44.
	Hs_hekN_ph_hcw120_2_apex	Wan, C., et al., Panorama of ancient metazoan macromolecular complexes. Nature, 2015. 525(7569): p. 339-44.
	Hs_hekN_ph_hcw120_2_pq_euc	Wan, C., et al., Panorama of ancient metazoan macromolecular complexes. Nature, 2015. 525(7569): p. 339-44.
	Hs_hek_kinase95_poisson	Wan, C., et al., Panorama of ancient metazoan macromolecular complexes. Nature, 2015. 525(7569): p. 339-44.
	Hs_hek_kinase95_wcc	Wan, C., et al., Panorama of ancient metazoan macromolecular complexes. Nature, 2015. 525(7569): p. 339-44.
	Hs_hek_kinase95_apex	Wan, C., et al., Panorama of ancient metazoan macromolecular complexes. Nature, 2015. 525(7569): p. 339-44.
	Hs_hek_kinase95_pq_euc	Wan, C., et al., Panorama of ancient metazoan macromolecular complexes. Nature, 2015. 525(7569): p. 339-44.
	Hs_hek_wan_membraneopioid72_poisson	Wan, C., et al., Panorama of ancient metazoan macromolecular complexes. Nature, 2015. 525(7569): p. 339-44.
	Hs_hek_wan_membraneopioid72_wcc	Wan, C., et al., Panorama of ancient metazoan macromolecular complexes. Nature, 2015. 525(7569): p. 339-44.
	Hs_hek_wan_membraneopioid72_apex	Wan, C., et al., Panorama of ancient metazoan macromolecular complexes. Nature, 2015. 525(7569): p. 339-44.
	Hs_hek_wan_membraneopioid72_pq_euc	Wan, C., et al., Panorama of ancient metazoan macromolecular complexes. Nature, 2015. 525(7569): p. 339-44.
	Hs_helaC_mar_SGF_poisson	Wan, C., et al., Panorama of ancient metazoan macromolecular complexes. Nature, 2015. 525(7569): p. 339-44.
	Hs_helaC_mar_SGF_wcc	Wan, C., et al., Panorama of ancient metazoan macromolecular complexes. Nature, 2015. 525(7569): p. 339-44.
	Hs_helaC_mar_SGF_apex	Wan, C., et al., Panorama of ancient metazoan macromolecular complexes. Nature, 2015. 525(7569): p. 339-44.
	Hs_helaC_mar_SGF_pq_euc	Wan, C., et al., Panorama of ancient metazoan macromolecular complexes. Nature, 2015. 525(7569): p. 339-44.
	Hs_helaC_mar_ief3_10_poisson	Wan, C., et al., Panorama of ancient metazoan macromolecular complexes. Nature, 2015. 525(7569): p. 339-44.
	Hs_helaC_mar_ief3_10_wcc	Wan, C., et al., Panorama of ancient metazoan macromolecular complexes. Nature, 2015. 525(7569): p. 339-44.
	Hs_helaC_mar_ief3_10_apex	Wan, C., et al., Panorama of ancient metazoan macromolecular complexes. Nature, 2015. 525(7569): p. 339-44.
	Hs_helaC_mar_ief3_10_pq_euc	Wan, C., et al., Panorama of ancient metazoan macromolecular complexes. Nature, 2015. 525(7569): p. 339-44.
	Hs_helaC_mar_ief5_8_poisson	Wan, C., et al., Panorama of ancient metazoan macromolecular complexes. Nature, 2015. 525(7569): p. 339-44.
	Hs_helaC_mar_ief5_8_wcc	Wan, C., et al., Panorama of ancient metazoan macromolecular complexes. Nature, 2015. 525(7569): p. 339-44.
	Hs_helaC_mar_ief5_8_apex	Wan, C., et al., Panorama of ancient metazoan macromolecular complexes. Nature, 2015. 525(7569): p. 339-44.
	Hs_helaC_mar_ief5_8_pq_euc	Wan, C., et al., Panorama of ancient metazoan macromolecular complexes. Nature, 2015. 525(7569): p. 339-44.
	Hs_helaC_ph_tcs269_1_poisson	Wan, C., et al., Panorama of ancient metazoan macromolecular complexes. Nature, 2015. 525(7569): p. 339-44.
	Hs_helaC_ph_tcs269_1_wcc	Wan, C., et al., Panorama of ancient metazoan macromolecular complexes. Nature, 2015. 525(7569): p. 339-44.
	Hs_helaC_ph_tcs269_1_apex	Wan, C., et al., Panorama of ancient metazoan macromolecular complexes. Nature, 2015. 525(7569): p. 339-44.
	Hs_helaC_ph_tcs269_1_pq_euc	Wan, C., et al., Panorama of ancient metazoan macromolecular complexes. Nature, 2015. 525(7569): p. 339-44.
	Hs_helaC_ph_tcs269_2_poisson	Wan, C., et al., Panorama of ancient metazoan macromolecular complexes. Nature, 2015. 525(7569): p. 339-44.
	Hs_helaC_ph_tcs269_2_wcc	Wan, C., et al., Panorama of ancient metazoan macromolecular complexes. Nature, 2015. 525(7569): p. 339-44.
	Hs_helaC_ph_tcs269_2_apex	Wan, C., et al., Panorama of ancient metazoan macromolecular complexes. Nature, 2015. 525(7569): p. 339-44.
	Hs_helaC_ph_tcs269_2_pq_euc	Wan, C., et al., Panorama of ancient metazoan macromolecular complexes. Nature, 2015. 525(7569): p. 339-44.
	Hs_helaC_ph_wax43_poisson	Wan, C., et al., Panorama of ancient metazoan macromolecular complexes. Nature, 2015. 525(7569): p. 339-44.
	Hs_helaC_ph_wax43_wcc	Wan, C., et al., Panorama of ancient metazoan macromolecular complexes. Nature, 2015. 525(7569): p. 339-44.
	Hs_helaC_ph_wax43_apex	Wan, C., et al., Panorama of ancient metazoan macromolecular complexes. Nature, 2015. 525(7569): p. 339-44.
	Hs_helaC_ph_wax43_pq_euc	Wan, C., et al., Panorama of ancient metazoan macromolecular complexes. Nature, 2015. 525(7569): p. 339-44.
	Hs_helaN_1003_poisson	Wan, C., et al., Panorama of ancient metazoan macromolecular complexes. Nature, 2015. 525(7569): p. 339-44.
	Hs_helaN_1003_wcc	Wan, C., et al., Panorama of ancient metazoan macromolecular complexes. Nature, 2015. 525(7569): p. 339-44.
	Hs_helaN_1003_apex	Wan, C., et al., Panorama of ancient metazoan macromolecular complexes. Nature, 2015. 525(7569): p. 339-44.
	Hs_helaN_1003_pq_euc	Wan, C., et al., Panorama of ancient metazoan macromolecular complexes. Nature, 2015. 525(7569): p. 339-44.
	Hs_helaN_1010_poisson	Wan, C., et al., Panorama of ancient metazoan macromolecular complexes. Nature, 2015. 525(7569): p. 339-44.
	Hs_helaN_1010_wcc	Wan, C., et al., Panorama of ancient metazoan macromolecular complexes. Nature, 2015. 525(7569): p. 339-44.
	Hs_helaN_1010_apex	Wan, C., et al., Panorama of ancient metazoan macromolecular complexes. Nature, 2015. 525(7569): p. 339-44.
	Hs_helaN_1010_pq_euc	Wan, C., et al., Panorama of ancient metazoan macromolecular complexes. Nature, 2015. 525(7569): p. 339-44.
	Hs_helaN_mar_SGF_poisson	Wan, C., et al., Panorama of ancient metazoan macromolecular complexes. Nature, 2015. 525(7569): p. 339-44.
	Hs_helaN_mar_SGF_wcc	Wan, C., et al., Panorama of ancient metazoan macromolecular complexes. Nature, 2015. 525(7569): p. 339-44.
	Hs_helaN_mar_SGF_apex	Wan, C., et al., Panorama of ancient metazoan macromolecular complexes. Nature, 2015. 525(7569): p. 339-44.
	Hs_helaN_mar_SGF_pq_euc	Wan, C., et al., Panorama of ancient metazoan macromolecular complexes. Nature, 2015. 525(7569): p. 339-44.
	Hs_helaN_mar_ief3_10_poisson	Wan, C., et al., Panorama of ancient metazoan macromolecular complexes. Nature, 2015. 525(7569): p. 339-44.
	Hs_helaN_mar_ief3_10_wcc	Wan, C., et al., Panorama of ancient metazoan macromolecular complexes. Nature, 2015. 525(7569): p. 339-44.
	Hs_helaN_mar_ief3_10_apex	Wan, C., et al., Panorama of ancient metazoan macromolecular complexes. Nature, 2015. 525(7569): p. 339-44.
	Hs_helaN_mar_ief3_10_pq_euc	Wan, C., et al., Panorama of ancient metazoan macromolecular complexes. Nature, 2015. 525(7569): p. 339-44.
	Hs_helaN_mar_ief5_8_poisson	Wan, C., et al., Panorama of ancient metazoan macromolecular complexes. Nature, 2015. 525(7569): p. 339-44.
	Hs_helaN_mar_ief5_8_wcc	Wan, C., et al., Panorama of ancient metazoan macromolecular complexes. Nature, 2015. 525(7569): p. 339-44.
	Hs_helaN_mar_ief5_8_apex	Wan, C., et al., Panorama of ancient metazoan macromolecular complexes. Nature, 2015. 525(7569): p. 339-44.
	Hs_helaN_mar_ief5_8_pq_euc	Wan, C., et al., Panorama of ancient metazoan macromolecular complexes. Nature, 2015. 525(7569): p. 339-44.
	Hs_helaN_ph_hcw120_1_poisson	Wan, C., et al., Panorama of ancient metazoan macromolecular complexes. Nature, 2015. 525(7569): p. 339-44.
	Hs_helaN_ph_hcw120_1_wcc	Wan, C., et al., Panorama of ancient metazoan macromolecular complexes. Nature, 2015. 525(7569): p. 339-44.
	Hs_helaN_ph_hcw120_1_apex	Wan, C., et al., Panorama of ancient metazoan macromolecular complexes. Nature, 2015. 525(7569): p. 339-44.
	Hs_helaN_ph_hcw120_1_pq_euc	Wan, C., et al., Panorama of ancient metazoan macromolecular complexes. Nature, 2015. 525(7569): p. 339-44.
	Hs_helaN_ph_hcw120_2_poisson	Wan, C., et al., Panorama of ancient metazoan macromolecular complexes. Nature, 2015. 525(7569): p. 339-44.
	Hs_helaN_ph_hcw120_2_wcc	Wan, C., et al., Panorama of ancient metazoan macromolecular complexes. Nature, 2015. 525(7569): p. 339-44.
	Hs_helaN_ph_hcw120_2_apex	Wan, C., et al., Panorama of ancient metazoan macromolecular complexes. Nature, 2015. 525(7569): p. 339-44.
	Hs_helaN_ph_hcw120_2_pq_euc	Wan, C., et al., Panorama of ancient metazoan macromolecular complexes. Nature, 2015. 525(7569): p. 339-44.
	Hs_helaN_ph_saf48_poisson	Wan, C., et al., Panorama of ancient metazoan macromolecular complexes. Nature, 2015. 525(7569): p. 339-44.
	Hs_helaN_ph_saf48_wcc	Wan, C., et al., Panorama of ancient metazoan macromolecular complexes. Nature, 2015. 525(7569): p. 339-44.
	Hs_helaN_ph_saf48_apex	Wan, C., et al., Panorama of ancient metazoan macromolecular complexes. Nature, 2015. 525(7569): p. 339-44.
	Hs_helaN_ph_saf48_pq_euc	Wan, C., et al., Panorama of ancient metazoan macromolecular complexes. Nature, 2015. 525(7569): p. 339-44.
	Hs_helaN_ph_tcs375_P1_poisson	Wan, C., et al., Panorama of ancient metazoan macromolecular complexes. Nature, 2015. 525(7569): p. 339-44.
	Hs_helaN_ph_tcs375_P1_wcc	Wan, C., et al., Panorama of ancient metazoan macromolecular complexes. Nature, 2015. 525(7569): p. 339-44.
	Hs_helaN_ph_tcs375_P1_apex	Wan, C., et al., Panorama of ancient metazoan macromolecular complexes. Nature, 2015. 525(7569): p. 339-44.
	Hs_helaN_ph_tcs375_P1_pq_euc	Wan, C., et al., Panorama of ancient metazoan macromolecular complexes. Nature, 2015. 525(7569): p. 339-44.
	Hs_helaN_ph_tcs375_P2_poisson	Wan, C., et al., Panorama of ancient metazoan macromolecular complexes. Nature, 2015. 525(7569): p. 339-44.
	Hs_helaN_ph_tcs375_P2_wcc	Wan, C., et al., Panorama of ancient metazoan macromolecular complexes. Nature, 2015. 525(7569): p. 339-44.
	Hs_helaN_ph_tcs375_P2_apex	Wan, C., et al., Panorama of ancient metazoan macromolecular complexes. Nature, 2015. 525(7569): p. 339-44.
	Hs_helaN_ph_tcs375_P2_pq_euc	Wan, C., et al., Panorama of ancient metazoan macromolecular complexes. Nature, 2015. 525(7569): p. 339-44.
	Hs_helaN_ph_tcs375_P3_poisson	Wan, C., et al., Panorama of ancient metazoan macromolecular complexes. Nature, 2015. 525(7569): p. 339-44.
	Hs_helaN_ph_tcs375_P3_wcc	Wan, C., et al., Panorama of ancient metazoan macromolecular complexes. Nature, 2015. 525(7569): p. 339-44.
	Hs_helaN_ph_tcs375_P3_apex	Wan, C., et al., Panorama of ancient metazoan macromolecular complexes. Nature, 2015. 525(7569): p. 339-44.
	Hs_helaN_ph_tcs375_P3_pq_euc	Wan, C., et al., Panorama of ancient metazoan macromolecular complexes. Nature, 2015. 525(7569): p. 339-44.
	Hs_wan_aguhplc108_1204_poisson	Wan, C., et al., Panorama of ancient metazoan macromolecular complexes. Nature, 2015. 525(7569): p. 339-44.
	Hs_wan_aguhplc108_1204_wcc	Wan, C., et al., Panorama of ancient metazoan macromolecular complexes. Nature, 2015. 525(7569): p. 339-44.
	Hs_wan_aguhplc108_1204_apex	Wan, C., et al., Panorama of ancient metazoan macromolecular complexes. Nature, 2015. 525(7569): p. 339-44.
	Hs_wan_aguhplc108_1204_pq_euc	Wan, C., et al., Panorama of ancient metazoan macromolecular complexes. Nature, 2015. 525(7569): p. 339-44.
	Hs_wan_shuhplc94_1206_poisson	Wan, C., et al., Panorama of ancient metazoan macromolecular complexes. Nature, 2015. 525(7569): p. 339-44.
	Hs_wan_shuhplc94_1206_wcc	Wan, C., et al., Panorama of ancient metazoan macromolecular complexes. Nature, 2015. 525(7569): p. 339-44.
	Hs_wan_shuhplc94_1206_apex	Wan, C., et al., Panorama of ancient metazoan macromolecular complexes. Nature, 2015. 525(7569): p. 339-44.
	Hs_wan_shuhplc94_1206_pq_euc	Wan, C., et al., Panorama of ancient metazoan macromolecular complexes. Nature, 2015. 525(7569): p. 339-44.
	Mm_1106_poisson	Wan, C., et al., Panorama of ancient metazoan macromolecular complexes. Nature, 2015. 525(7569): p. 339-44.
	Mm_1106_wcc	Wan, C., et al., Panorama of ancient metazoan macromolecular complexes. Nature, 2015. 525(7569): p. 339-44.
	Mm_1106_apex	Wan, C., et al., Panorama of ancient metazoan macromolecular complexes. Nature, 2015. 525(7569): p. 339-44.
	Mm_1106_pq_euc	Wan, C., et al., Panorama of ancient metazoan macromolecular complexes. Nature, 2015. 525(7569): p. 339-44.
	Mm_1201_poisson	Wan, C., et al., Panorama of ancient metazoan macromolecular complexes. Nature, 2015. 525(7569): p. 339-44.
	Mm_1201_wcc	Wan, C., et al., Panorama of ancient metazoan macromolecular complexes. Nature, 2015. 525(7569): p. 339-44.
	Mm_1201_apex	Wan, C., et al., Panorama of ancient metazoan macromolecular complexes. Nature, 2015. 525(7569): p. 339-44.
	Mm_1201_pq_euc	Wan, C., et al., Panorama of ancient metazoan macromolecular complexes. Nature, 2015. 525(7569): p. 339-44.
	Sp_1103_Egg_poisson	Wan, C., et al., Panorama of ancient metazoan macromolecular complexes. Nature, 2015. 525(7569): p. 339-44.
	Sp_1103_Egg_wcc	Wan, C., et al., Panorama of ancient metazoan macromolecular complexes. Nature, 2015. 525(7569): p. 339-44.
	Sp_1103_Egg_apex	Wan, C., et al., Panorama of ancient metazoan macromolecular complexes. Nature, 2015. 525(7569): p. 339-44.
	Sp_1103_Egg_pq_euc	Wan, C., et al., Panorama of ancient metazoan macromolecular complexes. Nature, 2015. 525(7569): p. 339-44.
	Sp_1108_2ce_poisson	Wan, C., et al., Panorama of ancient metazoan macromolecular complexes. Nature, 2015. 525(7569): p. 339-44.
	Sp_1108_2ce_wcc	Wan, C., et al., Panorama of ancient metazoan macromolecular complexes. Nature, 2015. 525(7569): p. 339-44.
	Sp_1108_2ce_apex	Wan, C., et al., Panorama of ancient metazoan macromolecular complexes. Nature, 2015. 525(7569): p. 339-44.
	Sp_1108_2ce_pq_euc	Wan, C., et al., Panorama of ancient metazoan macromolecular complexes. Nature, 2015. 525(7569): p. 339-44.
	Sp_1108_BL_poisson	Wan, C., et al., Panorama of ancient metazoan macromolecular complexes. Nature, 2015. 525(7569): p. 339-44.
	Sp_1108_BL_wcc	Wan, C., et al., Panorama of ancient metazoan macromolecular complexes. Nature, 2015. 525(7569): p. 339-44.
	Sp_1108_BL_apex	Wan, C., et al., Panorama of ancient metazoan macromolecular complexes. Nature, 2015. 525(7569): p. 339-44.
	Sp_1108_BL_pq_euc	Wan, C., et al., Panorama of ancient metazoan macromolecular complexes. Nature, 2015. 525(7569): p. 339-44.
	Sp_1109_PF5_poisson	Wan, C., et al., Panorama of ancient metazoan macromolecular complexes. Nature, 2015. 525(7569): p. 339-44.
	Sp_1109_PF5_wcc	Wan, C., et al., Panorama of ancient metazoan macromolecular complexes. Nature, 2015. 525(7569): p. 339-44.
	Sp_1109_PF5_apex	Wan, C., et al., Panorama of ancient metazoan macromolecular complexes. Nature, 2015. 525(7569): p. 339-44.
	Sp_1109_PF5_pq_euc	Wan, C., et al., Panorama of ancient metazoan macromolecular complexes. Nature, 2015. 525(7569): p. 339-44.
	Sp_1109_UNF_poisson	Wan, C., et al., Panorama of ancient metazoan macromolecular complexes. Nature, 2015. 525(7569): p. 339-44.
	Sp_1109_UNF_wcc	Wan, C., et al., Panorama of ancient metazoan macromolecular complexes. Nature, 2015. 525(7569): p. 339-44.
	Sp_1109_UNF_apex	Wan, C., et al., Panorama of ancient metazoan macromolecular complexes. Nature, 2015. 525(7569): p. 339-44.
	Sp_1109_UNF_pq_euc	Wan, C., et al., Panorama of ancient metazoan macromolecular complexes. Nature, 2015. 525(7569): p. 339-44.
	Sp_60_121010_poisson	Wan, C., et al., Panorama of ancient metazoan macromolecular complexes. Nature, 2015. 525(7569): p. 339-44.
	Sp_60_121010_wcc	Wan, C., et al., Panorama of ancient metazoan macromolecular complexes. Nature, 2015. 525(7569): p. 339-44.
	Sp_60_121010_apex	Wan, C., et al., Panorama of ancient metazoan macromolecular complexes. Nature, 2015. 525(7569): p. 339-44.
	Sp_60_121010_pq_euc	Wan, C., et al., Panorama of ancient metazoan macromolecular complexes. Nature, 2015. 525(7569): p. 339-44.
	Sp_beadsALF_60_121014_poisson	Wan, C., et al., Panorama of ancient metazoan macromolecular complexes. Nature, 2015. 525(7569): p. 339-44.
	Sp_beadsALF_60_121014_wcc	Wan, C., et al., Panorama of ancient metazoan macromolecular complexes. Nature, 2015. 525(7569): p. 339-44.
	Sp_beadsALF_60_121014_apex	Wan, C., et al., Panorama of ancient metazoan macromolecular complexes. Nature, 2015. 525(7569): p. 339-44.
	Sp_beadsALF_60_121014_pq_euc	Wan, C., et al., Panorama of ancient metazoan macromolecular complexes. Nature, 2015. 525(7569): p. 339-44.
	Sp_beadsBNF_73_1201119_poisson	Wan, C., et al., Panorama of ancient metazoan macromolecular complexes. Nature, 2015. 525(7569): p. 339-44.
	Sp_beadsBNF_73_1201119_wcc	Wan, C., et al., Panorama of ancient metazoan macromolecular complexes. Nature, 2015. 525(7569): p. 339-44.
	Sp_beadsBNF_73_1201119_apex	Wan, C., et al., Panorama of ancient metazoan macromolecular complexes. Nature, 2015. 525(7569): p. 339-44.
	Sp_beadsBNF_73_1201119_pq_euc	Wan, C., et al., Panorama of ancient metazoan macromolecular complexes. Nature, 2015. 525(7569): p. 339-44.
	Sp_beadsL_60_121125_poisson	Wan, C., et al., Panorama of ancient metazoan macromolecular complexes. Nature, 2015. 525(7569): p. 339-44.
	Sp_beadsL_60_121125_wcc	Wan, C., et al., Panorama of ancient metazoan macromolecular complexes. Nature, 2015. 525(7569): p. 339-44.
	Sp_beadsL_60_121125_apex	Wan, C., et al., Panorama of ancient metazoan macromolecular complexes. Nature, 2015. 525(7569): p. 339-44.
	Sp_beadsL_60_121125_pq_euc	Wan, C., et al., Panorama of ancient metazoan macromolecular complexes. Nature, 2015. 525(7569): p. 339-44.
	Sp_iex_60_121019_poisson	Wan, C., et al., Panorama of ancient metazoan macromolecular complexes. Nature, 2015. 525(7569): p. 339-44.
	Sp_iex_60_121019_wcc	Wan, C., et al., Panorama of ancient metazoan macromolecular complexes. Nature, 2015. 525(7569): p. 339-44.
	Sp_iex_60_121019_apex	Wan, C., et al., Panorama of ancient metazoan macromolecular complexes. Nature, 2015. 525(7569): p. 339-44.
	Sp_iex_60_121019_pq_euc	Wan, C., et al., Panorama of ancient metazoan macromolecular complexes. Nature, 2015. 525(7569): p. 339-44.
	CE.CC	Lee, I., et al., Prioritizing candidate disease genes by network-based boosting of genome-wide association data. Genome research, 2011. 21(7): p. 1109-1121.
	CE.CX	Lee, I., et al., Prioritizing candidate disease genes by network-based boosting of genome-wide association data. Genome research, 2011. 21(7): p. 1109-1121.
	CE.GT	Lee, I., et al., Prioritizing candidate disease genes by network-based boosting of genome-wide association data. Genome research, 2011. 21(7): p. 1109-1121.
	CE.LC	Lee, I., et al., Prioritizing candidate disease genes by network-based boosting of genome-wide association data. Genome research, 2011. 21(7): p. 1109-1121.
	CE.YH	Lee, I., et al., Prioritizing candidate disease genes by network-based boosting of genome-wide association data. Genome research, 2011. 21(7): p. 1109-1121.
	DM.PI	Lee, I., et al., Prioritizing candidate disease genes by network-based boosting of genome-wide association data. Genome research, 2011. 21(7): p. 1109-1121.
	HS.CX	Lee, I., et al., Prioritizing candidate disease genes by network-based boosting of genome-wide association data. Genome research, 2011. 21(7): p. 1109-1121.
	HS.DC	Lee, I., et al., Prioritizing candidate disease genes by network-based boosting of genome-wide association data. Genome research, 2011. 21(7): p. 1109-1121.
	HS.GN	Lee, I., et al., Prioritizing candidate disease genes by network-based boosting of genome-wide association data. Genome research, 2011. 21(7): p. 1109-1121.
	HS.MS	Lee, I., et al., Prioritizing candidate disease genes by network-based boosting of genome-wide association data. Genome research, 2011. 21(7): p. 1109-1121.
	HS.PG	Lee, I., et al., Prioritizing candidate disease genes by network-based boosting of genome-wide association data. Genome research, 2011. 21(7): p. 1109-1121.
	HS.YH	Lee, I., et al., Prioritizing candidate disease genes by network-based boosting of genome-wide association data. Genome research, 2011. 21(7): p. 1109-1121.
	SC.CC	Lee, I., et al., Prioritizing candidate disease genes by network-based boosting of genome-wide association data. Genome research, 2011. 21(7): p. 1109-1121.
	SC.CX	Lee, I., et al., Prioritizing candidate disease genes by network-based boosting of genome-wide association data. Genome research, 2011. 21(7): p. 1109-1121.
	SC.GT	Lee, I., et al., Prioritizing candidate disease genes by network-based boosting of genome-wide association data. Genome research, 2011. 21(7): p. 1109-1121.
	SC.LC	Lee, I., et al., Prioritizing candidate disease genes by network-based boosting of genome-wide association data. Genome research, 2011. 21(7): p. 1109-1121.
	SC.MS	Lee, I., et al., Prioritizing candidate disease genes by network-based boosting of genome-wide association data. Genome research, 2011. 21(7): p. 1109-1121.
	SC.TS	Lee, I., et al., Prioritizing candidate disease genes by network-based boosting of genome-wide association data. Genome research, 2011. 21(7): p. 1109-1121.
	SC.YH	Lee, I., et al., Prioritizing candidate disease genes by network-based boosting of genome-wide association data. Genome research, 2011. 21(7): p. 1109-1121.
	ext_Dm_guru	Guruharsha, K.G., et al., A protein complex network of Drosophila melanogaster. Cell, 2011. 147(3): p. 690-703.
	ext_Hs_malo	Malovannaya, A., et al., Analysis of the human endogenous coregulator complexome. Cell, 2011. 145(5): p. 787-99.
	entropy	Huttlin, E.L., et al., The BioPlex network: a systematic exploration of the human interactome. Cell, 2015. 162(2): p. 425-440.
	zscore	Huttlin, E.L., et al., The BioPlex network: a systematic exploration of the human interactome. Cell, 2015. 162(2): p. 425-440.
	nwdscore	Huttlin, E.L., et al., The BioPlex network: a systematic exploration of the human interactome. Cell, 2015. 162(2): p. 425-440.
	plate_zscore	Huttlin, E.L., et al., The BioPlex network: a systematic exploration of the human interactome. Cell, 2015. 162(2): p. 425-440.
	uPeps	Huttlin, E.L., et al., The BioPlex network: a systematic exploration of the human interactome. Cell, 2015. 162(2): p. 425-440.
	ratio	Huttlin, E.L., et al., The BioPlex network: a systematic exploration of the human interactome. Cell, 2015. 162(2): p. 425-440.
	total_psms	Huttlin, E.L., et al., The BioPlex network: a systematic exploration of the human interactome. Cell, 2015. 162(2): p. 425-440.
	ratioTotalPSMs	Huttlin, E.L., et al., The BioPlex network: a systematic exploration of the human interactome. Cell, 2015. 162(2): p. 425-440.
	UtoTratio	Huttlin, E.L., et al., The BioPlex network: a systematic exploration of the human interactome. Cell, 2015. 162(2): p. 425-440.
	neg_ln_pval	Drew, K., et al., Integration of over 9,000 mass spectrometry experiments builds a global map of human protein complexes. Molecular systems biology, 2017. 13(6): p. 932.
	pair_count	Drew, K., et al., Integration of over 9,000 mass spectrometry experiments builds a global map of human protein complexes. Molecular systems biology, 2017. 13(6): p. 932.
	prey.bait.correlation	Hein, M.Y., et al., A human interactome in three quantitative dimensions organized by stoichiometries and abundances. Cell, 2015. 163(3): p. 712-723.
	valid.values	Hein, M.Y., et al., A human interactome in three quantitative dimensions organized by stoichiometries and abundances. Cell, 2015. 163(3): p. 712-723.
	log10.prey.bait.ratio	Hein, M.Y., et al., A human interactome in three quantitative dimensions organized by stoichiometries and abundances. Cell, 2015. 163(3): p. 712-723.
	log10.prey.bait.expression.ratio	Hein, M.Y., et al., A human interactome in three quantitative dimensions organized by stoichiometries and abundances. Cell, 2015. 163(3): p. 712-723.
	hein_neg_ln_pval	Drew, K., et al., Integration of over 9,000 mass spectrometry experiments builds a global map of human protein complexes. Molecular systems biology, 2017. 13(6): p. 932.
	hein_pair_count	Drew, K., et al., Integration of over 9,000 mass spectrometry experiments builds a global map of human protein complexes. Molecular systems biology, 2017. 13(6): p. 932.
