# Supplementary material for: Identification of Protein Complexes by Integrating Protein Abundance and Interaction Features Using a Deep Learning Strategy
Source: Int J Mol Sci. 2023 Apr 26;24(9):7884. doi: 10.3390/ijms24097884 (PMC10178578; doi:10.3390/ijms24097884)
Supplement: Supplementary file 1 [file ijms-24-07884-s001.zip › Table S2.xlsx]

## Sheet: Table S2A
	Table S2A. List of Parameters in Deep Learning
	Listed are neuron accounts and dropout parameters for deep learning models with protein interaction features (highlighted in light blue lines are models with F1-measure > 0.59)
	Models	Seed	Layer I		Layer II		Layer III		Recall	Precision	F1-measure
			Neurons	Dropout	Neurons	Dropout	Neurons	Dropout
	1	seed113704	500	0.099	160	0.262	45	0.151
	1	seed113704	700	0.099	190	0.029	30	0.185
	1	seed159043	550	0.339	190	0.117	50	0.423
	1	seed181091	200	0.457	100	0.424	50	0.115
	1	seed186720	300	0.127	190	0.372	30	0.493
	1	seed201241	450	0.388	160	0.478	30	0.074
	1	seed218795	600	0.398	190	0.481	50	0.298
	1	seed232222	300	0.114	160	0.003	30	0.009
	1	seed232549	600	0.395	190	0.393	35	0.235
	1	seed258801	550	0.324	50	0.322	40	0.41
	1	seed265179	250	0.369	190	0.151	35	0.221
	1	seed266817	350	0.292	70	0.14	25	0.144
	1	seed282731	200	0.49	190	0.091	40	0.297
	1	seed286219	400	0.315	170	0.187	25	0.309
	1	seed292312	400	0.116	50	0.067	15	0.145
	1	seed302688	750	0.284	70	0.059	35	0.119	0.505531	0.710818	0.590851
	1	seed304663	350	0.372	180	0.049	20	0.471
	1	seed316607	650	0.451	190	0.361	30	0.409
	1	seed39995	750	0.248	180	0.329	30	0.06
	1	seed456078	450	0.458	60	0.408	35	0.22
	1	seed45769	400	0.062	170	0.132	50	0.263
	1	seed507291	650	0.063	110	0.357	35	0.449
	1	seed514247	400	0.022	120	0.287	40	0.366
	1	seed525684	400	0.237	170	0.393	35	0.054
	1	seed544969	650	0.222	100	0.368	25	0.001	0.524975	0.676458	0.591166
	1	seed609274	350	0.255	160	0.109	50	0.282
	1	seed622299	750	0.201	170	0.049	25	0.146
	1	seed623378	300	0.032	180	0.342	15	0.286
	1	seed640308	750	0.24	90	0.002	30	0.18
	1	seed666079	550	0.384	50	0.194	40	0.211
	1	seed693585	450	0.325	180	0.056	15	0.119
	1	seed759645	650	0.079	120	0.441	50	0.426
	1	seed807321	700	0.232	60	0.011	15	0.059
	1	seed810579	350	0.026	160	0.188	15	0.356
	1	seed831322	650	0.006	70	0.059	50	0.122
	1	seed837284	650	0.483	90	0.456	10	0.077
	1	seed860912	350	0.19	190	0.163	10	0.044	0.532015	0.692559	0.601763
	1	seed914634	700	0.36	150	0.072	35	0.003
	1	seed923422	400	0.253	150	0.274	35	0.132
	1	seed9496	450	0.106	60	0.043	10	0.476
	1	seed992113	300	0.258	110	0.45	30	0.259
	10	seed113704	400	0.36	70	0.029	10	0.129
	10	seed159043	600	0.147	130	0.365	20	0.087
	10	seed181091	200	0.403	200	0.09	20	0.232
	10	seed186720	450	0.299	50	0.148	25	0.103
	10	seed201241	550	0.155	140	0.051	35	0.402
	10	seed218795	400	0.482	80	0.053	10	0.246
	10	seed232222	250	0.217	180	0.356	40	0.081
	10	seed232549	500	0.06	130	0.249	45	0.014
	10	seed258801	600	0.433	150	0.349	30	0.061
	10	seed265179	200	0.045	80	0.485	10	0.316
	10	seed266817	700	0.241	190	0.236	30	0.177
	10	seed282731	350	0.291	110	0.156	45	0.399
	10	seed286219	600	0.221	190	0.368	15	0.121
	10	seed292312	400	0.166	110	0.27	50	0.426
	10	seed302688	550	0.464	80	0.031	25	0.218
	10	seed304663	700	0.422	160	0.357	35	0.118
	10	seed316607	650	0.464	100	0.396	20	0.29
	10	seed39995	500	0.17	160	0.175	30	0.26
	10	seed456078	550	0.18	90	0.25	40	0.169
	10	seed45769	500	0.454	50	0.283	25	0.351
	10	seed507291	600	0.207	80	0.49	25	0.432
	10	seed514247	700	0.179	130	0.201	25	0.303
	10	seed525684	450	0.433	80	0.043	35	0.104
	10	seed544969	450	0.408	190	0.453	25	0.357
	10	seed609274	200	0.084	140	0.318	15	0.454
	10	seed622299	400	0.418	90	0.418	35	0.225
	10	seed623378	450	0.318	100	0.037	35	0.426
	10	seed640308	200	0.117	200	0.014	15	0.356
	10	seed666079	600	0.092	180	0.275	40	0.031	0.538887	0.660707	0.593612
	10	seed693585	350	0.29	120	0.214	45	0.476
	10	seed759645	750	0.189	110	0.371	25	0.27
	10	seed807321	400	0.128	200	0.245	50	0.278
	10	seed810579	700	0.059	90	0.474	45	0.019
	10	seed831322	250	0.136	150	0.458	20	0.373
	10	seed837284	300	0.105	60	0.143	30	0.104
	10	seed860912	700	0.135	160	0.162	35	0.474
	10	seed914634	650	0.375	70	0.426	20	0.301
	10	seed923422	250	0.193	200	0.171	15	0.114
	10	seed9496	400	0.208	80	0.364	15	0.465
	10	seed992113	650	0.292	100	0.052	15	0.211
	11	seed113704	600	0.246	140	0.251	25	0.461
	11	seed159043	250	0.351	200	0.227	40	0.287
	11	seed181091	650	0.21	170	0.145	45	0.126
	11	seed186720	300	0.355	140	0.416	45	0.25
	11	seed201241	600	0.421	120	0.314	10	0.021
	11	seed218795	650	0.213	120	0.098	10	0.156
	11	seed232222	300	0.485	200	0.071	35	0.061	0.538049	0.671548	0.597432
	11	seed232549	200	0.449	150	0.166	20	0.392
	11	seed258801	350	0.034	50	0.345	25	0.359
	11	seed265179	300	0.27	190	0.3	40	0.062
	11	seed266817	750	0.301	120	0.046	35	0.203
	11	seed282731	600	0.117	80	0.362	20	0.186
	11	seed286219	500	0.359	160	0.297	20	0.113
	11	seed292312	400	0.054	90	0.371	15	0.165
	11	seed302688	750	0.45	150	0.22	35	0.205
	11	seed304663	750	0.485	110	0.441	35	0.271
	11	seed316607	650	0.117	100	0.315	20	0.11
	11	seed39995	550	0.241	60	0.136	45	0.021
	11	seed456078	300	0.488	70	0.347	30	0.373
	11	seed45769	200	0.412	190	0.344	35	0.142
	11	seed507291	250	0.455	100	0.222	35	0.09
	11	seed514247	300	0.169	110	0.238	35	0.446
	11	seed525684	300	0.104	170	0.243	35	0.017
	11	seed544969	350	0.052	150	0.361	35	0.435
	11	seed609274	600	0.07	50	0.284	10	0.318
	11	seed622299	550	0.371	170	0.435	15	0.482
	11	seed623378	400	0.178	60	0.27	35	0.246
	11	seed640308	200	0.424	90	0.086	20	0.38
	11	seed666079	600	0.326	90	0.138	20	0.472
	11	seed693585	650	0.372	120	0.023	10	0.298
	11	seed759645	300	0.268	50	0.097	30	0.16
	11	seed807321	250	0.27	50	0.342	10	0.066
	11	seed810579	250	0.194	170	0.176	50	0.257
	11	seed831322	200	0.302	90	0.387	20	0.183
	11	seed837284	750	0.372	140	0.151	15	0.351
	11	seed860912	300	0.155	70	0.397	40	0.321
	11	seed914634	700	0.326	140	0.384	25	0.331
	11	seed923422	250	0.127	50	0.15	20	0.078
	11	seed9496	550	0.174	100	0.059	35	0.441
	11	seed992113	550	0.003	130	0.007	20	0.347
	12	seed113704	700	0.38	200	0.23	30	0.332
	12	seed159043	400	0.223	170	0.363	50	0.424
	12	seed181091	300	0.216	150	0.269	15	0.388
	12	seed186720	500	0.473	80	0.363	45	0.422
	12	seed201241	250	0.341	130	0.095	45	0.453
	12	seed218795	250	0.34	120	0.303	35	0.446
	12	seed232222	650	0.276	160	0.431	35	0.428
	12	seed232549	250	0.289	170	0.317	40	0.401
	12	seed258801	500	0.178	160	0.099	45	0.307
	12	seed265179	750	0.332	70	0.195	10	0.253
	12	seed266817	450	0.437	140	0.061	45	0.148
	12	seed282731	650	0.43	160	0.4	20	0.259
	12	seed286219	250	0.469	160	0.003	50	0.059
	12	seed292312	550	0.359	80	0.05	35	0.03	0.53168	0.668352	0.592233
	12	seed302688	250	0.363	130	0.189	25	0.454
	12	seed304663	600	0.215	90	0.379	10	0.234
	12	seed316607	250	0.41	170	0.146	25	0.315
	12	seed39995	700	0.346	180	0.111	20	0.246
	12	seed456078	400	0.364	120	0.314	25	0.03
	12	seed45769	200	0.276	80	0.122	30	0.382
	12	seed507291	350	0.422	60	0.467	10	0.211
	12	seed514247	200	0.23	130	0.171	20	0.434
	12	seed525684	400	0.194	130	0.224	45	0.451
	12	seed544969	650	0.488	190	0.182	15	0.166
	12	seed609274	200	0	110	0.256	15	0.198
	12	seed622299	400	0.132	130	0.468	45	0.233
	12	seed623378	600	0.099	120	0.348	10	0.393
	12	seed640308	350	0.151	130	0.349	25	0.36
	12	seed666079	600	0.305	140	0.47	40	0.396
	12	seed693585	500	0.01	70	0.115	45	0.456
	12	seed759645	450	0.016	180	0.453	40	0.337
	12	seed807321	650	0.263	140	0.009	40	0.159
	12	seed810579	700	0.072	50	0.273	20	0.307
	12	seed831322	500	0.05	190	0.157	35	0.352
	12	seed837284	250	0.258	50	0.213	40	0.239
	12	seed860912	700	0.19	200	0.057	45	0.415
	12	seed914634	450	0.031	70	0.364	50	0.24
	12	seed923422	550	0.337	50	0.342	35	0.037
	12	seed9496	300	0.41	90	0.233	45	0.211
	12	seed992113	650	0.007	150	0.346	30	0.49
	13	seed113704	650	0.218	60	0.238	50	0.352
	13	seed159043	550	0.214	170	0.231	15	0.256
	13	seed181091	250	0.221	80	0.486	40	0.141
	13	seed186720	700	0.494	160	0.339	15	0.264
	13	seed201241	600	0.257	190	0.042	35	0.289
	13	seed218795	500	0.212	50	0.251	15	0.343
	13	seed232222	750	0.484	120	0.155	10	0.395
	13	seed232549	650	0.018	140	0.435	10	0.158
	13	seed258801	550	0.382	110	0.094	40	0.24
	13	seed265179	500	0.205	90	0.176	35	0.074
	13	seed266817	200	0.063	160	0.464	35	0.066
	13	seed282731	550	0.1	70	0.42	25	0.364
	13	seed286219	500	0.139	130	0.422	25	0.349
	13	seed292312	750	0.495	160	0.251	50	0.075
	13	seed302688	550	0.142	200	0.007	50	0.456
	13	seed304663	600	0.492	70	0.11	50	0.282
	13	seed316607	350	0.397	190	0.278	45	0.213
	13	seed39995	500	0.004	60	0.329	35	0.112
	13	seed456078	550	0.449	60	0.214	30	0.491
	13	seed45769	700	0.206	140	0.004	35	0.122	0.573248	0.613123	0.592516
	13	seed507291	650	0.271	120	0.216	35	0.188
	13	seed514247	600	0.011	160	0.316	25	0.39
	13	seed525684	400	0.046	100	0.463	45	0.028
	13	seed544969	250	0.072	70	0.18	10	0.292
	13	seed609274	600	0.156	150	0.364	20	0.44
	13	seed622299	550	0.357	150	0.318	15	0.298
	13	seed623378	450	0.474	60	0.401	45	0.257
	13	seed640308	550	0.044	190	0.231	35	0.497
	13	seed666079	400	0.307	60	0.467	10	0.272
	13	seed693585	750	0.311	160	0.088	50	0.241
	13	seed759645	550	0.041	190	0.265	25	0.118
	13	seed807321	600	0.371	180	0.355	20	0.247
	13	seed810579	350	0.23	160	0.401	10	0.272
	13	seed831322	300	0.155	170	0.114	10	0.353
	13	seed837284	250	0.14	150	0.081	35	0.487
	13	seed860912	650	0.142	50	0.474	25	0.344
	13	seed914634	200	0.04	160	0.189	40	0.159
	13	seed923422	350	0.428	180	0.246	50	0.482
	13	seed9496	200	0.071	120	0.05	35	0.218
	13	seed992113	450	0.334	130	0.176	25	0.037
	14	seed113704	700	0.305	80	0.031	30	0.446
	14	seed159043	550	0.364	60	0.076	50	0.05	0.560845	0.666003	0.608917
	14	seed181091	300	0.038	160	0.07	10	0.354
	14	seed186720	650	0.126	70	0.401	15	0.384
	14	seed201241	250	0.33	110	0.352	10	0.449
	14	seed218795	450	0.014	120	0.07	50	0.049
	14	seed232222	650	0.281	50	0.134	15	0.129	0.53939	0.695032	0.607399
	14	seed232549	750	0.144	170	0.235	40	0.118
	14	seed258801	600	0.42	130	0.111	20	0.245
	14	seed265179	700	0.19	80	0.229	20	0.273
	14	seed266817	350	0.274	80	0.117	35	0.108
	14	seed282731	700	0.257	50	0.143	30	0.034
	14	seed286219	750	0.187	70	0.03	15	0.18
	14	seed292312	450	0.36	170	0.03	45	0.134
	14	seed302688	400	0.003	110	0.237	25	0.437
	14	seed304663	450	0.298	80	0.008	25	0.313
	14	seed316607	450	0.343	190	0.185	50	0.427
	14	seed39995	250	0.244	150	0.293	20	0.063
	14	seed456078	550	0.153	70	0.367	15	0.28
	14	seed45769	300	0.313	180	0.461	20	0.273
	14	seed507291	400	0.073	60	0.257	25	0.265
	14	seed514247	300	0.347	90	0.107	40	0.214
	14	seed525684	750	0.474	90	0.462	30	0.488
	14	seed544969	500	0.408	150	0.235	15	0.07	0.50771	0.741312	0.602666
	14	seed609274	550	0.454	200	0.461	10	0.169
	14	seed622299	600	0.063	80	0.278	35	0.244
	14	seed623378	450	0.484	110	0.406	25	0.167
	14	seed640308	650	0.288	110	0.065	35	0.308
	14	seed666079	750	0.227	70	0.092	25	0.432
	14	seed693585	400	0.448	170	0.023	30	0.442
	14	seed759645	400	0.054	60	0.315	20	0.114
	14	seed807321	450	0.026	150	0.422	10	0.065
	14	seed810579	500	0.085	160	0.213	25	0.114
	14	seed831322	400	0.141	80	0.223	20	0.032
	14	seed837284	750	0.016	70	0.456	45	0.305
	14	seed860912	550	0.202	200	0.432	40	0.44
	14	seed914634	300	0.445	90	0.378	20	0.481
	14	seed923422	200	0.199	140	0.358	30	0.351
	14	seed9496	250	0.091	90	0.042	15	0.094
	14	seed992113	450	0.462	150	0.446	25	0.492
	15	seed113704	250	0.185	140	0.386	15	0.297
	15	seed159043	750	0.379	60	0.495	10	0.161	0.55347	0.663986	0.603711
	15	seed181091	600	0.353	170	0.309	35	0.374
	15	seed186720	350	0.148	50	0.285	15	0.018
	15	seed201241	350	0.065	140	0.034	25	0.446
	15	seed218795	750	0.238	180	0.452	40	0.167
	15	seed232222	400	0.175	130	0.001	10	0.044
	15	seed232549	400	0.454	100	0.485	25	0.368
	15	seed258801	400	0.453	60	0.175	30	0.334
	15	seed265179	700	0.113	50	0.091	10	0.242
	15	seed266817	550	0.326	180	0.327	15	0.421
	15	seed282731	400	0.379	170	0.201	45	0.464
	15	seed286219	500	0.277	140	0.494	20	0.141
	15	seed292312	250	0.318	190	0.166	10	0.366
	15	seed302688	750	0.264	90	0.162	20	0.442
	15	seed304663	200	0.141	90	0.037	10	0.119
	15	seed316607	450	0.154	70	0.149	10	0.399
	15	seed39995	300	0.373	70	0.243	15	0.383
	15	seed456078	600	0.32	70	0.211	45	0.168
	15	seed45769	700	0.292	180	0.024	35	0.026	0.579785	0.636079	0.606629
	15	seed507291	300	0.445	180	0.18	20	0.057
	15	seed514247	550	0.32	120	0.45	15	0.304
	15	seed525684	700	0.096	200	0.463	50	0.045
	15	seed544969	200	0.077	130	0.297	25	0.026
	15	seed609274	450	0.05	190	0.413	45	0.25
	15	seed622299	650	0.238	170	0.164	25	0.106
	15	seed623378	700	0.209	110	0.222	20	0.331
	15	seed640308	450	0.019	130	0.275	50	0.039
	15	seed666079	650	0.475	70	0.179	10	0.002	0.503688	0.715306	0.591128
	15	seed693585	400	0.314	50	0.063	40	0.002
	15	seed759645	200	0.366	90	0.456	40	0.221
	15	seed807321	600	0.224	120	0.145	10	0.295
	15	seed810579	450	0.233	130	0.218	25	0.083	0.530841	0.683132	0.597434
	15	seed831322	700	0.065	60	0.105	40	0.362
	15	seed837284	500	0.052	50	0.425	10	0.274
	15	seed860912	650	0.188	70	0.282	15	0.063
	15	seed914634	450	0.416	80	0.259	45	0.075
	15	seed923422	350	0.134	80	0.387	45	0.495
	15	seed9496	700	0.091	150	0.06	40	0.151
	15	seed992113	300	0.08	100	0.374	15	0.042
	16	seed113704	700	0.325	80	0.101	35	0.157
	16	seed159043	450	0.313	140	0.456	30	0.291
	16	seed181091	200	0.236	60	0.25	35	0.319
	16	seed186720	450	0.49	60	0.285	10	0.078
	16	seed201241	700	0.373	90	0.19	20	0.239
	16	seed218795	500	0.376	80	0.155	25	0.154
	16	seed232222	200	0.005	180	0.166	45	0.019
	16	seed232549	550	0.476	170	0.46	35	0.398
	16	seed258801	700	0.343	170	0.289	35	0.354
	16	seed265179	550	0.318	70	0.431	45	0.131
	16	seed266817	550	0.34	190	0.486	20	0.202
	16	seed282731	200	0.177	180	0.035	25	0.162
	16	seed286219	600	0.163	100	0.138	10	0.195
	16	seed292312	200	0.303	120	0.345	40	0.368
	16	seed302688	600	0.362	190	0.37	30	0.224
	16	seed304663	500	0.41	60	0.349	10	0.215	0.539893	0.653082	0.591118
	16	seed316607	750	0.309	160	0.053	45	0.335
	16	seed39995	350	0.262	170	0.09	15	0.196
	16	seed456078	400	0.308	70	0.305	20	0.175
	16	seed45769	550	0.465	150	0.03	10	0.442
	16	seed507291	450	0.466	160	0.072	30	0.477
	16	seed514247	600	0.417	170	0.201	20	0.369
	16	seed525684	450	0.276	120	0.012	30	0.102
	16	seed544969	400	0.034	200	0.243	10	0.297
	16	seed609274	250	0.034	160	0.358	15	0.411
	16	seed622299	400	0.476	90	0.497	25	0.129
	16	seed623378	200	0.134	160	0.13	15	0.001
	16	seed640308	200	0.471	140	0.23	20	0.089
	16	seed666079	700	0.102	100	0.475	10	0.233
	16	seed693585	550	0.477	110	0.18	25	0.385
	16	seed759645	350	0.374	50	0.339	45	0.32
	16	seed807321	550	0.332	140	0.155	25	0.451
	16	seed810579	650	0.478	180	0.019	35	0.284
	16	seed831322	650	0.017	50	0.108	20	0.273
	16	seed837284	750	0.187	180	0.473	15	0.267
	16	seed860912	450	0.352	150	0.187	10	0.247
	16	seed914634	550	0.254	130	0.184	10	0.342
	16	seed923422	250	0.402	160	0.405	45	0.444
	16	seed9496	600	0.465	130	0.303	40	0.301
	16	seed992113	600	0.225	190	0.118	10	0.111
	17	seed113704	650	0.037	180	0.426	15	0.322
	17	seed159043	650	0.225	160	0.16	30	0.385
	17	seed181091	700	0.469	130	0.063	40	0.069
	17	seed186720	600	0.15	150	0.168	25	0.392
	17	seed201241	200	0.094	60	0.179	50	0.497
	17	seed218795	200	0.438	120	0.432	45	0.334
	17	seed232222	250	0.41	60	0.149	40	0.448
	17	seed232549	650	0.395	80	0.311	35	0.074
	17	seed258801	600	0.07	120	0.043	20	0.356
	17	seed265179	500	0.486	170	0.454	25	0.459
	17	seed266817	450	0.445	110	0.267	40	0.019
	17	seed282731	700	0.429	50	0.142	10	0.396
	17	seed286219	550	0.236	120	0.076	20	0.153
	17	seed292312	700	0.337	150	0.479	45	0.343
	17	seed302688	700	0.115	70	0.348	30	0.41
	17	seed304663	300	0.001	140	0.475	20	0.006
	17	seed316607	550	0.347	110	0.194	50	0.421
	17	seed39995	650	0.409	190	0.047	45	0.492
	17	seed456078	650	0.492	190	0.483	25	0.272
	17	seed45769	750	0.102	90	0.294	35	0.055
	17	seed507291	600	0.419	130	0.094	10	0.493
	17	seed514247	200	0.418	130	0.25	20	0.181
	17	seed525684	600	0.414	200	0.299	45	0.006
	17	seed544969	300	0.124	180	0.072	50	0.464
	17	seed609274	650	0.442	140	0.353	25	0.209
	17	seed622299	550	0.172	100	0.268	15	0.325
	17	seed623378	550	0.292	110	0.492	40	0.026
	17	seed640308	250	0.284	200	0.328	10	0.059
	17	seed666079	300	0.44	160	0.103	30	0.084
	17	seed693585	450	0.309	160	0.249	35	0.396
	17	seed759645	700	0.398	200	0.049	15	0.382
	17	seed807321	250	0.088	120	0.093	25	0.189
	17	seed810579	700	0.215	110	0.102	35	0.021
	17	seed831322	300	0.291	70	0.16	25	0.307
	17	seed837284	500	0.484	150	0.048	40	0.345
	17	seed860912	250	0.219	70	0.166	25	0.252
	17	seed914634	200	0.296	100	0.13	20	0.073
	17	seed923422	750	0.244	100	0.201	20	0.436
	17	seed9496	500	0.362	110	0.131	40	0.217
	17	seed992113	600	0.048	180	0.061	45	0.317
	18	seed113704	650	0.034	170	0.036	10	0.349
	18	seed159043	250	0.401	190	0.107	45	0.159
	18	seed181091	500	0.047	60	0.265	25	0.009
	18	seed186720	350	0.438	140	0.214	25	0.037
	18	seed201241	250	0.064	170	0.071	50	0.279
	18	seed218795	400	0.436	150	0.471	20	0.45
	18	seed232222	450	0.335	50	0.451	30	0.363
	18	seed232549	650	0.221	90	0.356	30	0.005
	18	seed258801	500	0.21	60	0.349	35	0.421
	18	seed265179	650	0.266	200	0.208	40	0.316
	18	seed266817	200	0.068	90	0.493	10	0.306
	18	seed282731	550	0.29	180	0.284	35	0.164
	18	seed286219	450	0.488	170	0.318	10	0.128
	18	seed292312	700	0.114	190	0.134	50	0.327
	18	seed302688	250	0.037	50	0.097	45	0.331
	18	seed304663	250	0.337	200	0.126	45	0.404
	18	seed316607	500	0.216	140	0.124	40	0.341
	18	seed39995	350	0.37	90	0.401	40	0.172
	18	seed456078	300	0.447	60	0.038	20	0.326
	18	seed45769	250	0.173	120	0.165	30	0.037
	18	seed507291	250	0.484	100	0.214	35	0.498
	18	seed514247	200	0.449	200	0.232	25	0.379
	18	seed525684	550	0.156	110	0.294	30	0.188
	18	seed544969	650	0.271	120	0.13	40	0.489
	18	seed609274	600	0.321	120	0.243	25	0.325
	18	seed622299	750	0.472	170	0.304	30	0.371
	18	seed623378	600	0.455	170	0.391	20	0.092
	18	seed640308	600	0.112	140	0.423	45	0.253
	18	seed666079	250	0.031	130	0.422	10	0.29
	18	seed693585	400	0.321	50	0.274	40	0.322
	18	seed759645	300	0.272	100	0.332	50	0.156
	18	seed807321	450	0.105	170	0.378	25	0.252
	18	seed810579	450	0.403	80	0.212	45	0.429
	18	seed831322	600	0.418	90	0.128	15	0.449
	18	seed837284	400	0.211	130	0.023	35	0.438
	18	seed860912	400	0.45	60	0.058	20	0.345
	18	seed914634	550	0.112	190	0.341	10	0.349
	18	seed923422	250	0.397	170	0.142	40	0.137
	18	seed9496	500	0.084	170	0.264	25	0.493
	18	seed992113	550	0.177	200	0.285	40	0.184
	19	seed113704	200	0.319	170	0.307	45	0.34
	19	seed159043	450	0.153	100	0.268	30	0.449
	19	seed181091	550	0.167	200	0.352	15	0.223
	19	seed186720	550	0.045	130	0.197	35	0.074	0.534361	0.664444	0.592345
	19	seed201241	400	0.167	60	0.286	40	0.348
	19	seed218795	500	0.351	160	0.17	10	0.401
	19	seed232222	500	0.193	100	0.222	30	0.2
	19	seed232549	450	0.389	60	0.231	10	0.262
	19	seed258801	750	0.103	130	0.374	25	0.176
	19	seed265179	200	0.244	130	0.392	45	0.244
	19	seed266817	600	0.216	80	0.408	50	0.419
	19	seed282731	600	0.173	200	0.06	15	0.158
	19	seed286219	200	0.238	110	0.492	25	0.206
	19	seed292312	750	0.351	70	0.094	50	0.444
	19	seed302688	650	0.167	90	0.193	20	0.007	0.529501	0.702937	0.604015
	19	seed304663	700	0.051	80	0.058	40	0.08
	19	seed316607	750	0.182	110	0.453	45	0.062
	19	seed39995	750	0.04	150	0.122	15	0.173
	19	seed456078	750	0.472	200	0.426	45	0.483
	19	seed45769	250	0.172	170	0.41	50	0.487
	19	seed507291	250	0.31	150	0.258	50	0.144
	19	seed514247	350	0.006	50	0.354	15	0.309
	19	seed525684	200	0.271	160	0.173	25	0.244
	19	seed544969	550	0.143	70	0.06	50	0.291
	19	seed609274	650	0.338	190	0.387	10	0.492
	19	seed622299	450	0	110	0.439	50	0.404
	19	seed623378	250	0.338	90	0.179	45	0.109
	19	seed640308	600	0.165	190	0.236	35	0.199
	19	seed666079	300	0.41	130	0.383	50	0.096
	19	seed693585	350	0.448	60	0.177	45	0.164
	19	seed759645	200	0.176	110	0.32	15	0.367
	19	seed807321	350	0.391	110	0.184	40	0.38
	19	seed810579	400	0.01	110	0.414	15	0.204
	19	seed831322	700	0.14	120	0.258	10	0.393
	19	seed837284	200	0.369	140	0.057	10	0.308
	19	seed860912	550	0.192	160	0.123	10	0.2
	19	seed914634	250	0.203	90	0.061	35	0.355
	19	seed923422	500	0.125	100	0.362	45	0.064
	19	seed9496	400	0.366	140	0.228	35	0.065
	19	seed992113	500	0.444	60	0.481	30	0.16
	2	seed113704	250	0.202	160	0.035	40	0.015
	2	seed113704	350	0.202	60	0.389	50	0.268
	2	seed159043	450	0.255	110	0.263	50	0.327
	2	seed181091	300	0.22	100	0.246	20	0.082
	2	seed186720	500	0.46	80	0.496	50	0.019
	2	seed201241	200	0.036	130	0.192	25	0.137
	2	seed218795	250	0.457	60	0.132	35	0.144
	2	seed232222	600	0.21	200	0.483	40	0.021
	2	seed232549	450	0.185	70	0.381	40	0.34
	2	seed258801	450	0.174	90	0.252	35	0.309
	2	seed265179	600	0.267	140	0.445	40	0.353
	2	seed266817	250	0.354	100	0.389	10	0.274
	2	seed282731	600	0.177	110	0.348	20	0.004	0.523634	0.679426	0.591443
	2	seed286219	350	0.133	120	0.467	30	0.431
	2	seed292312	400	0.182	50	0.139	30	0.245
	2	seed302688	250	0.402	100	0.081	40	0.442
	2	seed304663	200	0.159	200	0.204	35	0.099
	2	seed316607	550	0.017	80	0.129	15	0.241
	2	seed39995	300	0.468	200	0.489	20	0.302
	2	seed456078	750	0.31	110	0.477	30	0.223
	2	seed45769	550	0.468	190	0.142	50	0.38
	2	seed507291	250	0.218	120	0.459	35	0.213
	2	seed514247	300	0.107	80	0.484	45	0.177
	2	seed525684	250	0.148	90	0.447	45	0.105
	2	seed544969	750	0.088	70	0.328	35	0.446
	2	seed609274	500	0.244	180	0.267	10	0.139
	2	seed622299	400	0.104	190	0.443	45	0.096
	2	seed623378	450	0.194	150	0.077	35	0.237
	2	seed640308	300	0.114	130	0.404	45	0.072
	2	seed666079	350	0.044	120	0.079	30	0.118
	2	seed693585	300	0.397	100	0.009	20	0.291
	2	seed759645	550	0.117	70	0.156	45	0.436
	2	seed807321	250	0.255	200	0.273	50	0.491
	2	seed810579	650	0.267	190	0.172	25	0.153
	2	seed831322	450	0.437	100	0.457	10	0.091
	2	seed837284	450	0.055	60	0.179	45	0.203
	2	seed860912	500	0.41	180	0.061	25	0.143
	2	seed914634	250	0.415	70	0.051	45	0.268
	2	seed923422	650	0.082	120	0.133	35	0.299
	2	seed9496	750	0.203	100	0.412	35	0.003
	2	seed992113	750	0.015	60	0.463	20	0.035
	20	seed113704	700	0.491	110	0.37	25	0.369
	20	seed159043	450	0.169	160	0.132	45	0.385
	20	seed181091	650	0.418	50	0.039	10	0.279
	20	seed186720	650	0.134	180	0.075	20	0.166
	20	seed201241	250	0.376	100	0.109	10	0.358
	20	seed218795	300	0.013	170	0.436	25	0.109
	20	seed232222	650	0.405	80	0.089	45	0.484
	20	seed232549	650	0.222	170	0.233	50	0.156
	20	seed258801	600	0.06	170	0.326	40	0.485
	20	seed265179	550	0.088	150	0.23	15	0.295
	20	seed266817	500	0.336	200	0.078	25	0.446
	20	seed282731	600	0.469	80	0.465	20	0.145
	20	seed286219	600	0.177	110	0.384	50	0.068
	20	seed292312	550	0.263	160	0.164	45	0.109
	20	seed302688	350	0.391	50	0.046	20	0.172
	20	seed304663	350	0.096	190	0.023	20	0.256
	20	seed316607	500	0.251	100	0.268	45	0.459
	20	seed39995	650	0.345	190	0.202	40	0.413
	20	seed456078	550	0.061	120	0.095	30	0.363
	20	seed45769	450	0.363	170	0.459	25	0.076
	20	seed507291	650	0.203	160	0.132	30	0.398
	20	seed514247	250	0.294	80	0.325	50	0.181
	20	seed525684	600	0.17	60	0.208	25	0.067
	20	seed544969	400	0.079	150	0.349	25	0.019
	20	seed609274	750	0.318	100	0.08	20	0.384
	20	seed622299	700	0.199	60	0.098	30	0.288
	20	seed623378	700	0.044	60	0.128	25	0.118
	20	seed640308	300	0.486	140	0.103	15	0.129
	20	seed666079	600	0.407	180	0.226	25	0.256
	20	seed693585	550	0.307	80	0.432	40	0.429
	20	seed759645	500	0.129	110	0.079	40	0.451
	20	seed807321	650	0.254	80	0.196	20	0.238
	20	seed810579	750	0.247	90	0.358	50	0.151
	20	seed831322	600	0.401	180	0.015	20	0.189
	20	seed837284	300	0.23	130	0.021	40	0.323
	20	seed860912	400	0.062	110	0.263	35	0.353
	20	seed914634	350	0.077	160	0.264	20	0.086
	20	seed923422	500	0.24	100	0.377	10	0.113
	20	seed9496	200	0.495	90	0.08	30	0.433
	20	seed992113	500	0.385	70	0.241	25	0.382
	21	seed113704	300	0.023	80	0.38	30	0.374
	21	seed159043	500	0.097	160	0.118	10	0.457
	21	seed181091	350	0.25	120	0.182	40	0.477
	21	seed186720	400	0.252	200	0.392	30	0.042
	21	seed201241	750	0.346	170	0.407	35	0.284
	21	seed218795	650	0.434	100	0.388	20	0.219
	21	seed232222	500	0.353	140	0.187	25	0.442
	21	seed232549	450	0.461	190	0.118	40	0.196
	21	seed258801	350	0.422	200	0.29	40	0.445
	21	seed265179	200	0.293	140	0.084	15	0.48
	21	seed266817	700	0.215	140	0.393	10	0.428
	21	seed282731	250	0.2	90	0.01	45	0.005
	21	seed286219	300	0.342	120	0.416	30	0.088
	21	seed292312	350	0.199	200	0.015	40	0.322
	21	seed302688	450	0.453	110	0.173	10	0.463
	21	seed304663	400	0.138	100	0.04	50	0.107
	21	seed316607	350	0.439	190	0.371	20	0.112
	21	seed39995	200	0.353	140	0.176	35	0.016
	21	seed456078	250	0.258	120	0.316	10	0.337
	21	seed45769	750	0.092	140	0.391	25	0.299
	21	seed507291	550	0.268	150	0.099	35	0.082
	21	seed514247	600	0.165	100	0.142	20	0.483
	21	seed525684	700	0.409	170	0.162	50	0.277
	21	seed544969	550	0.487	70	0.163	35	0.064	0.521287	0.686837	0.59272
	21	seed609274	700	0.48	180	0.454	15	0.36
	21	seed622299	300	0.265	200	0.405	35	0.285
	21	seed623378	600	0.045	90	0.09	45	0.262
	21	seed640308	400	0.143	120	0.194	20	0.472
	21	seed666079	550	0.171	120	0.427	50	0.286
	21	seed693585	700	0.272	140	0.351	45	0.16
	21	seed759645	300	0.104	70	0.072	50	0.238
	21	seed807321	300	0.31	70	0.099	25	0.058
	21	seed810579	250	0.162	110	0.112	40	0.059
	21	seed831322	350	0.238	100	0.189	50	0.19
	21	seed837284	500	0.192	200	0.424	30	0.244
	21	seed860912	550	0.297	140	0.194	10	0.487
	21	seed914634	300	0.293	200	0.276	35	0.172
	21	seed923422	700	0.45	200	0.244	40	0.017
	21	seed9496	400	0.227	80	0.432	50	0.359
	21	seed992113	300	0.358	190	0.064	20	0.486
	22	seed113704	450	0.055	70	0.009	35	0.121
	22	seed159043	400	0.239	130	0.305	45	0.164
	22	seed181091	550	0.093	60	0.186	25	0.289
	22	seed186720	650	0.101	180	0.344	30	0.143
	22	seed201241	250	0.402	70	0.468	40	0.187
	22	seed218795	700	0.491	140	0.304	25	0.218
	22	seed232222	300	0.367	200	0.392	35	0.341
	22	seed232549	400	0.178	190	0.369	15	0.257
	22	seed258801	250	0.286	160	0.105	15	0.209
	22	seed265179	700	0.087	140	0.388	10	0.085
	22	seed266817	550	0.395	200	0.318	25	0.304
	22	seed282731	550	0.058	130	0.192	25	0.306
	22	seed286219	550	0.179	50	0.007	25	0.436
	22	seed292312	200	0.495	190	0.407	10	0.089
	22	seed302688	500	0.359	50	0.437	35	0.16
	22	seed304663	700	0.005	180	0.424	45	0.107
	22	seed316607	450	0.437	190	0.496	50	0.372
	22	seed39995	200	0.487	80	0.087	50	0.211
	22	seed456078	400	0.172	50	0.498	40	0.493
	22	seed45769	550	0.371	160	0.004	45	0.495
	22	seed507291	250	0.131	200	0.31	50	0.154
	22	seed514247	500	0.386	150	0.34	40	0.354
	22	seed525684	250	0.469	100	0.069	20	0.08	0.49933	0.722007	0.590369
	22	seed544969	200	0.133	90	0.199	10	0.116
	22	seed609274	300	0.103	140	0.237	10	0.466
	22	seed622299	250	0.036	80	0.331	15	0.379
	22	seed623378	650	0.001	150	0.134	50	0.406
	22	seed640308	500	0.203	160	0.295	50	0.103
	22	seed666079	200	0.247	110	0.098	20	0.354
	22	seed693585	450	0.1	160	0.272	10	0.249
	22	seed759645	500	0.492	70	0.082	15	0.095
	22	seed807321	450	0.021	50	0.428	45	0.334
	22	seed810579	200	0.047	90	0.254	20	0.03
	22	seed831322	350	0.299	50	0.055	50	0.184
	22	seed837284	600	0.24	170	0.281	45	0.42
	22	seed860912	250	0.167	160	0.177	40	0.322
	22	seed914634	550	0.284	100	0.486	30	0.136
	22	seed923422	700	0.436	110	0.005	45	0.127
	22	seed9496	200	0.024	170	0.204	15	0.119
	22	seed992113	450	0.101	50	0.196	20	0.384
	23	seed113704	200	0.17	110	0.099	30	0.322
	23	seed159043	400	0.222	60	0.339	25	0.446
	23	seed181091	700	0.338	140	0.035	10	0.47
	23	seed186720	350	0.472	120	0.27	35	0.359
	23	seed201241	600	0.145	120	0.459	35	0.429
	23	seed218795	300	0.327	140	0.319	25	0.001
	23	seed232222	650	0.067	130	0.329	45	0.35
	23	seed232549	750	0.305	60	0.172	30	0.499
	23	seed258801	650	0.211	50	0.304	40	0.11
	23	seed265179	700	0.402	120	0.21	50	0.076
	23	seed266817	200	0.187	100	0.293	15	0.042
	23	seed282731	400	0.446	100	0.412	10	0.012
	23	seed286219	650	0.261	170	0.037	25	0.155
	23	seed292312	700	0.03	120	0.479	35	0.201
	23	seed302688	250	0.006	120	0.307	15	0.497
	23	seed304663	550	0.457	50	0.424	20	0.076
	23	seed316607	750	0.04	150	0.028	45	0.477
	23	seed39995	550	0.404	130	0.165	50	0.234
	23	seed456078	700	0.306	170	0.4	50	0.377
	23	seed45769	200	0.384	110	0.198	30	0.226
	23	seed507291	750	0.443	190	0.353	40	0.131
	23	seed514247	250	0.33	60	0.216	30	0.248
	23	seed525684	700	0.074	200	0.015	25	0.195
	23	seed544969	550	0.083	60	0.031	50	0.129
	23	seed609274	750	0.262	190	0.43	15	0.461
	23	seed622299	300	0.228	80	0.457	40	0.098
	23	seed623378	250	0.426	160	0.419	30	0.08
	23	seed640308	250	0.096	170	0.269	25	0.401
	23	seed666079	200	0.186	140	0.415	40	0.119
	23	seed693585	200	0.183	150	0.053	20	0.455
	23	seed759645	200	0.458	100	0.357	45	0.352
	23	seed807321	700	0.236	190	0.298	35	0.289
	23	seed810579	200	0.356	160	0.017	10	0.371
	23	seed831322	700	0.228	130	0.094	40	0.208
	23	seed837284	650	0.422	60	0.143	15	0.367
	23	seed860912	550	0.446	110	0.294	25	0.448
	23	seed914634	350	0.081	90	0.185	45	0.178
	23	seed923422	750	0.107	110	0.405	20	0.458
	23	seed9496	650	0.27	160	0.264	50	0.486
	23	seed992113	750	0.279	180	0.216	10	0.174
	24	seed113704	300	0.456	200	0.087	10	0.134
	24	seed159043	350	0.177	150	0.308	50	0.439
	24	seed181091	600	0.257	110	0.149	35	0.015
	24	seed186720	200	0.345	110	0.166	45	0.184
	24	seed201241	750	0.257	70	0.441	25	0.47
	24	seed218795	250	0.198	50	0.435	45	0.473
	24	seed232222	450	0.473	90	0.224	30	0.345
	24	seed232549	200	0.453	60	0.478	45	0.324
	24	seed258801	550	0.008	80	0.441	30	0.13
	24	seed265179	600	0.218	150	0.197	30	0.287
	24	seed266817	250	0.086	110	0.399	20	0.092
	24	seed282731	500	0.301	80	0.105	45	0.463
	24	seed286219	600	0.181	140	0.313	30	0.092
	24	seed292312	250	0.246	70	0.355	20	0.378
	24	seed302688	550	0.331	140	0.357	25	0.151
	24	seed304663	700	0.056	180	0.189	40	0.143
	24	seed316607	250	0.011	200	0.386	30	0.371
	24	seed39995	550	0.088	160	0.24	20	0.285
	24	seed456078	750	0.131	190	0.374	15	0.013
	24	seed45769	450	0.003	80	0.284	25	0.466
	24	seed507291	450	0.157	120	0.16	20	0.421
	24	seed514247	500	0.418	180	0.261	25	0.037
	24	seed525684	700	0.285	170	0.214	20	0.432
	24	seed544969	450	0.053	180	0.472	35	0.015
	24	seed609274	200	0.135	140	0.266	35	0.107
	24	seed622299	350	0.167	90	0.453	30	0.067
	24	seed623378	500	0.028	90	0.116	35	0.349
	24	seed640308	250	0.332	100	0.328	25	0.463
	24	seed666079	250	0.132	80	0.494	10	0.459
	24	seed693585	250	0.122	60	0.096	15	0.429
	24	seed759645	650	0.23	80	0.445	35	0.406
	24	seed807321	350	0.38	120	0.209	25	0.304
	24	seed810579	750	0.461	160	0.078	50	0.417
	24	seed831322	350	0.469	160	0.423	35	0.188
	24	seed837284	200	0.464	90	0.27	45	0.14
	24	seed860912	500	0.247	70	0.417	15	0.286
	24	seed914634	350	0.098	110	0.384	20	0.204
	24	seed923422	350	0.086	80	0.382	15	0.335
	24	seed9496	500	0.176	120	0.26	15	0.451
	24	seed992113	350	0.398	130	0.142	30	0.315
	25	seed113704	750	0.467	100	0.343	15	0.215
	25	seed159043	500	0.459	170	0.265	10	0.41
	25	seed181091	700	0.05	150	0.145	25	0.125
	25	seed186720	250	0.479	120	0.321	35	0.106
	25	seed201241	250	0.375	70	0.429	35	0.239
	25	seed218795	350	0.093	60	0.157	15	0.437
	25	seed232222	500	0.059	60	0.189	15	0.082
	25	seed232549	500	0.459	120	0.088	35	0.404
	25	seed258801	300	0.083	100	0.328	20	0.422
	25	seed265179	300	0.195	100	0.444	30	0.411
	25	seed266817	400	0.414	160	0.217	25	0.288
	25	seed282731	650	0.449	150	0.453	50	0.335
	25	seed286219	550	0.202	190	0.168	50	0.487
	25	seed292312	250	0.172	60	0.207	25	0.396
	25	seed302688	400	0.479	120	0.358	35	0.432
	25	seed304663	450	0.215	180	0.096	25	0.142
	25	seed316607	200	0.151	80	0.096	25	0.446
	25	seed39995	750	0.014	110	0.265	30	0.017
	25	seed456078	200	0.097	200	0.408	15	0.126
	25	seed45769	450	0.175	90	0.292	10	0.404
	25	seed507291	700	0.387	110	0.316	10	0.119
	25	seed514247	350	0.419	150	0.101	30	0.24
	25	seed525684	700	0.412	180	0.026	25	0.221
	25	seed544969	250	0.216	170	0.145	15	0.168
	25	seed609274	700	0.449	170	0.274	35	0.492
	25	seed622299	200	0.317	110	0.083	25	0.471
	25	seed623378	500	0.04	110	0.242	15	0.204
	25	seed640308	550	0.216	180	0.392	45	0.361
	25	seed666079	400	0.442	170	0.087	25	0.384
	25	seed693585	650	0.008	200	0.108	20	0.37
	25	seed759645	350	0.011	190	0.434	10	0.136
	25	seed807321	550	0.084	90	0.393	20	0.446
	25	seed810579	700	0.255	200	0.304	45	0.149
	25	seed831322	250	0.316	90	0.241	20	0.192
	25	seed837284	350	0.356	180	0.119	45	0.258
	25	seed860912	500	0.421	140	0.091	40	0.252
	25	seed914634	450	0.335	160	0.465	10	0.32
	25	seed923422	500	0.038	80	0.424	40	0.021
	25	seed9496	750	0.316	130	0.468	50	0.291
	25	seed992113	200	0.399	180	0.024	25	0.03
	26	seed113704	750	0.273	160	0.178	35	0.014
	26	seed159043	300	0.065	180	0.327	40	0.364
	26	seed181091	350	0.189	60	0.149	15	0.046
	26	seed186720	400	0.124	140	0.371	45	0.321
	26	seed201241	650	0.31	170	0.168	45	0.325
	26	seed218795	400	0.278	90	0.07	50	0.229
	26	seed232222	300	0.182	170	0.401	35	0.286
	26	seed232549	400	0.181	170	0.263	45	0.045
	26	seed258801	550	0.369	110	0.324	50	0.349
	26	seed265179	650	0.412	100	0.366	30	0.148
	26	seed266817	250	0.282	180	0.012	35	0.225
	26	seed282731	300	0.109	180	0.054	20	0.02	0.550285	0.647279	0.594854
	26	seed286219	650	0.381	170	0.262	30	0.337
	26	seed292312	450	0.025	130	0.134	45	0.49
	26	seed302688	300	0.496	60	0.03	45	0.348
	26	seed304663	450	0.193	170	0.456	40	0.195
	26	seed316607	250	0.134	110	0.329	45	0.46
	26	seed39995	350	0.335	80	0.474	10	0.414
	26	seed456078	350	0.441	170	0.433	15	0.289
	26	seed45769	400	0.107	90	0.336	20	0.171
	26	seed507291	700	0.259	150	0.5	45	0.225
	26	seed514247	750	0.081	200	0.326	20	0.155
	26	seed525684	750	0.318	130	0.329	30	0.233
	26	seed544969	400	0.445	150	0.387	20	0.345
	26	seed609274	600	0.234	90	0.055	25	0.059
	26	seed622299	450	0.073	180	0.424	20	0.243
	26	seed623378	200	0.326	80	0.309	40	0.258
	26	seed640308	600	0.284	60	0.108	35	0.111	0.576601	0.613191	0.594333
	26	seed666079	650	0.246	100	0.152	35	0.008
	26	seed693585	750	0.496	170	0.405	10	0.011
	26	seed759645	600	0.39	160	0.165	45	0.049	0.532015	0.685677	0.599151
	26	seed807321	600	0.335	180	0.13	15	0.111	0.522461	0.690213	0.594734
	26	seed810579	650	0.169	180	0.317	15	0.463
	26	seed831322	600	0.472	50	0.321	45	0.322
	26	seed837284	550	0.369	140	0.261	10	0.334
	26	seed860912	750	0.026	130	0.307	10	0.053
	26	seed914634	600	0.179	130	0.076	35	0.106	0.529501	0.668855	0.591075
	26	seed923422	400	0.093	50	0.137	25	0.304
	26	seed9496	600	0.081	130	0.08	15	0.022
	26	seed992113	250	0.27	110	0.426	15	0.02
	27	seed113704	550	0.232	140	0.437	35	0.318
	27	seed159043	700	0.025	120	0.159	25	0.41
	27	seed181091	500	0.169	60	0.266	30	0.311
	27	seed186720	550	0.475	160	0.358	35	0.136
	27	seed201241	550	0.336	130	0.206	15	0.382
	27	seed218795	500	0.336	130	0.064	15	0.341
	27	seed232222	550	0.003	60	0.238	30	0.304
	27	seed232549	400	0.456	60	0.197	10	0.415
	27	seed258801	700	0.205	50	0.143	35	0.059
	27	seed265179	400	0.398	200	0.481	10	0.43
	27	seed266817	500	0.412	190	0.168	15	0.156
	27	seed282731	750	0.406	150	0.421	15	0.384
	27	seed286219	600	0.275	190	0.485	25	0.003
	27	seed292312	750	0.031	50	0.304	20	0.387
	27	seed302688	650	0.187	110	0.123	20	0.472
	27	seed304663	600	0.451	180	0.466	10	0.466
	27	seed316607	600	0.081	200	0.321	40	0.342
	27	seed39995	750	0.211	200	0.121	35	0.422
	27	seed456078	700	0.332	80	0.294	45	0.164
	27	seed45769	400	0.104	90	0.246	40	0.113	0.54006	0.657551	0.593043
	27	seed507291	400	0.328	80	0.486	15	0.192
	27	seed514247	450	0.395	170	0.231	10	0.381
	27	seed525684	750	0.451	180	0.402	15	0.474
	27	seed544969	300	0.115	140	0.192	40	0.126
	27	seed609274	700	0.1	190	0.166	10	0.365
	27	seed622299	700	0.148	170	0.339	40	0.002
	27	seed623378	200	0.327	160	0.398	20	0.342
	27	seed640308	750	0.273	190	0.011	40	0.309
	27	seed666079	600	0.441	110	0.458	35	0.473
	27	seed693585	550	0.023	190	0.396	10	0.472
	27	seed759645	250	0.26	120	0.39	20	0.338
	27	seed807321	300	0.296	130	0.412	30	0.454
	27	seed810579	650	0.001	70	0.415	10	0.394
	27	seed831322	400	0.455	160	0.282	20	0.045
	27	seed837284	600	0.019	50	0.456	25	0.048
	27	seed860912	550	0.196	150	0.299	40	0.221
	27	seed914634	450	0.267	60	0.198	40	0.127
	27	seed923422	400	0.39	60	0.461	30	0.012
	27	seed9496	400	0.439	200	0.246	30	0.242
	27	seed992113	600	0.075	160	0.277	25	0.431
	28	seed113704	250	0.274	110	0.023	40	0.144	0.526483	0.671297	0.590136
	28	seed159043	650	0.116	150	0.352	50	0.432
	28	seed181091	450	0.408	150	0.407	10	0.142
	28	seed186720	600	0.155	90	0.215	15	0.065
	28	seed201241	200	0.154	180	0.288	50	0.275
	28	seed218795	400	0.083	60	0.34	35	0.455
	28	seed232222	200	0.487	100	0.168	15	0.016	0.507208	0.716044	0.593799
	28	seed232549	550	0.378	80	0.13	35	0.489
	28	seed258801	400	0.463	120	0.115	15	0.482
	28	seed265179	250	0.36	190	0.494	40	0.198
	28	seed266817	500	0.464	120	0.174	15	0.176
	28	seed282731	550	0.288	140	0.34	20	0.463
	28	seed286219	550	0.182	70	0.081	30	0.226
	28	seed292312	650	0.303	170	0.255	25	0.466
	28	seed302688	700	0.474	120	0.246	30	0.092
	28	seed304663	550	0.359	50	0.002	15	0.282
	28	seed316607	550	0.22	120	0.458	45	0.478
	28	seed39995	300	0.116	100	0.313	50	0.362
	28	seed456078	700	0.401	50	0.226	35	0.023
	28	seed45769	300	0.423	130	0.099	10	0.266
	28	seed507291	250	0.303	180	0.028	50	0.169
	28	seed514247	700	0.185	100	0.439	25	0.434
	28	seed525684	200	0.185	50	0.066	30	0.346
	28	seed544969	450	0.409	60	0.388	15	0.183
	28	seed609274	350	0.217	180	0.45	30	0.431
	28	seed622299	350	0.437	130	0.178	45	0.478
	28	seed623378	450	0.169	110	0.433	30	0.242
	28	seed640308	250	0.308	110	0.37	45	0.118
	28	seed666079	350	0.048	90	0.472	15	0.273
	28	seed693585	700	0.369	100	0.372	45	0.304
	28	seed759645	700	0.212	130	0.197	45	0.213
	28	seed807321	300	0.008	160	0.221	25	0.336
	28	seed810579	600	0.033	50	0.008	35	0.229
	28	seed831322	700	0.307	120	0.314	40	0.435
	28	seed837284	750	0.479	160	0.118	10	0.309
	28	seed860912	400	0.087	160	0.498	45	0.216
	28	seed914634	700	0.249	110	0.49	30	0.079
	28	seed923422	600	0.104	160	0.434	25	0.11
	28	seed9496	650	0.446	160	0.419	40	0.056
	28	seed992113	600	0.238	180	0.041	40	0.216
	29	seed113704	550	0.348	140	0.378	35	0.162
	29	seed159043	350	0.02	150	0.249	30	0.22
	29	seed181091	400	0.402	100	0.368	30	0.118
	29	seed186720	300	0.024	60	0.375	25	0.052
	29	seed201241	350	0.238	100	0.462	20	0.33
	29	seed218795	300	0.24	200	0.16	30	0.232
	29	seed232222	300	0.108	170	0.309	40	0.462
	29	seed232549	750	0.374	180	0.413	15	0.23
	29	seed258801	200	0.114	200	0.182	20	0.115
	29	seed265179	750	0.16	70	0.135	15	0.191
	29	seed266817	400	0.329	180	0.312	15	0.401
	29	seed282731	500	0.34	100	0.342	20	0.329
	29	seed286219	700	0.215	170	0.106	50	0.172
	29	seed292312	300	0.043	150	0.018	20	0.073
	29	seed302688	700	0.081	160	0.151	10	0.13
	29	seed304663	750	0.29	160	0.058	45	0.342
	29	seed316607	700	0.296	180	0.482	50	0.13
	29	seed39995	300	0.081	140	0.174	40	0.119
	29	seed456078	350	0.092	60	0.069	30	0.469
	29	seed45769	200	0.473	90	0.111	50	0.27
	29	seed507291	700	0.447	50	0.371	15	0.283
	29	seed514247	750	0.467	140	0.048	30	0.111	0.50352	0.715068	0.590931
	29	seed525684	200	0.201	100	0.062	20	0.124
	29	seed544969	750	0.013	150	0.062	40	0.481
	29	seed609274	450	0.448	60	0.443	25	0.359
	29	seed622299	450	0.342	200	0.095	35	0.275
	29	seed623378	500	0.202	160	0.142	35	0.049
	29	seed640308	200	0.153	110	0.368	10	0.487
	29	seed666079	450	0.434	150	0.456	20	0.497
	29	seed693585	600	0.18	160	0.457	45	0.491
	29	seed759645	700	0.225	50	0.141	45	0.26
	29	seed807321	650	0.307	80	0.32	30	0.461
	29	seed810579	500	0.061	180	0.081	15	0.417
	29	seed831322	550	0.103	170	0.205	20	0.396
	29	seed837284	500	0.434	110	0.039	25	0.256
	29	seed860912	600	0.203	190	0.308	35	0.217
	29	seed914634	400	0.012	140	0.154	50	0.1
	29	seed923422	450	0.222	140	0.009	30	0.455
	29	seed9496	750	0.095	130	0.16	40	0.184
	29	seed992113	600	0.185	80	0.229	40	0.072
	3	seed113704	200	0.029	180	0.32	45	0.342
	3	seed159043	250	0.004	160	0.157	30	0.179
	3	seed181091	650	0.215	190	0.437	15	0.135
	3	seed186720	400	0.017	180	0.379	25	0.149
	3	seed201241	550	0.174	70	0.059	20	0.306
	3	seed218795	450	0.339	180	0.376	20	0.311
	3	seed232222	400	0.404	90	0.39	35	0.308
	3	seed232549	300	0.311	60	0.35	45	0.115
	3	seed258801	450	0.359	140	0.109	10	0.199
	3	seed265179	650	0.117	130	0.5	15	0.299
	3	seed266817	400	0.199	80	0.036	50	0.242
	3	seed282731	450	0.075	190	0.069	15	0.218
	3	seed286219	400	0.166	150	0.475	25	0.44
	3	seed292312	600	0.484	130	0.424	50	0.108
	3	seed302688	600	0.358	120	0.342	40	0.264
	3	seed304663	650	0.093	110	0.063	20	0.25
	3	seed316607	600	0.487	180	0.442	50	0.4
	3	seed39995	450	0.322	80	0.315	15	0.135
	3	seed456078	650	0.447	160	0.097	50	0.062
	3	seed45769	400	0.051	170	0.43	40	0.348
	3	seed507291	700	0.425	160	0.45	35	0.445
	3	seed514247	400	0.043	120	0.209	40	0.316
	3	seed525684	400	0.256	200	0.19	45	0.014
	3	seed544969	650	0.086	50	0.37	25	0.244
	3	seed609274	550	0.311	200	0.38	30	0.189
	3	seed622299	300	0.044	50	0.112	45	0.329	0.541737	0.664337	0.596805
	3	seed623378	700	0.013	70	0.231	45	0.394
	3	seed640308	500	0.059	130	0.171	40	0.478
	3	seed666079	450	0.324	110	0.265	15	0.44
	3	seed693585	200	0.457	80	0.033	15	0.27
	3	seed759645	600	0.295	80	0.053	50	0.39
	3	seed807321	600	0.015	160	0.12	35	0.497
	3	seed810579	750	0.417	80	0.149	30	0.394
	3	seed831322	200	0.194	170	0.044	45	0.333
	3	seed837284	450	0.028	100	0.209	45	0.469
	3	seed860912	250	0.326	140	0.277	50	0.264
	3	seed914634	450	0.106	190	0.03	25	0.118
	3	seed923422	550	0.097	80	0.368	50	0.489
	3	seed9496	500	0.388	100	0.336	30	0.234
	3	seed992113	200	0.109	90	0.279	45	0.126
	30	seed113704	450	0.202	140	0.003	25	0.368
	30	seed159043	650	0.406	180	0.19	30	0.29
	30	seed181091	400	0.039	130	0.484	30	0.314
	30	seed186720	500	0.202	140	0.319	45	0.238
	30	seed201241	450	0.466	140	0.285	20	0.415
	30	seed218795	200	0.285	110	0.199	10	0.127
	30	seed232222	750	0.315	200	0.129	30	0.06
	30	seed232549	450	0.229	160	0.393	15	0.079
	30	seed258801	650	0.204	160	0.382	15	0.108
	30	seed265179	250	0.416	110	0.345	35	0.212
	30	seed266817	550	0.42	70	0.05	10	0.392
	30	seed282731	450	0.055	100	0.031	15	0.103
	30	seed286219	200	0.275	120	0.332	40	0.054
	30	seed292312	500	0.062	130	0.096	25	0.103
	30	seed302688	250	0.068	90	0.386	20	0.18
	30	seed304663	500	0.117	140	0.037	50	0.212
	30	seed316607	650	0.01	180	0.223	35	0.314
	30	seed39995	650	0.321	200	0.27	40	0.428
	30	seed456078	700	0.199	130	0.045	30	0.108
	30	seed45769	650	0.021	80	0.391	25	0.395
	30	seed507291	300	0.097	140	0.44	50	0.106
	30	seed514247	650	0.137	60	0.11	40	0.491
	30	seed525684	250	0.24	170	0.386	25	0.33
	30	seed544969	550	0.216	50	0.314	20	0.3
	30	seed609274	650	0.258	110	0.304	30	0.394
	30	seed622299	600	0.203	200	0.403	25	0.363
	30	seed623378	450	0.453	200	0.493	20	0.43
	30	seed640308	600	0.144	110	0.034	20	0.125
	30	seed666079	650	0.303	160	0.487	20	0.393
	30	seed693585	400	0.18	110	0.373	45	0.353
	30	seed759645	650	0.139	90	0.184	20	0.227
	30	seed807321	450	0.169	90	0.009	40	0.001
	30	seed810579	200	0.418	110	0.174	40	0.312
	30	seed831322	700	0.028	190	0.147	20	0.292
	30	seed837284	300	0.016	190	0.228	45	0.414
	30	seed860912	700	0.192	200	0.449	40	0.337
	30	seed914634	450	0.45	140	0.128	15	0.464
	30	seed923422	250	0.199	120	0.269	45	0.312
	30	seed9496	650	0.136	160	0.039	10	0.209
	30	seed992113	500	0.179	120	0.497	45	0.379
	31	seed113704	400	0.169	190	0.263	20	0.252
	31	seed159043	500	0.152	100	0.182	50	0.33
	31	seed181091	750	0.088	160	0.065	40	0.321
	31	seed186720	300	0.317	110	0.235	35	0.422
	31	seed201241	550	0.285	130	0.21	25	0.206
	31	seed218795	500	0.091	160	0.091	25	0.313
	31	seed232222	450	0.359	190	0.173	15	0.386
	31	seed232549	250	0.126	60	0.399	50	0.074
	31	seed258801	250	0.372	200	0.021	35	0.476
	31	seed265179	550	0.195	70	0.296	15	0.083
	31	seed266817	300	0.113	200	0.471	45	0.318
	31	seed282731	550	0.468	100	0.497	45	0.117
	31	seed286219	550	0.219	100	0.43	50	0.173
	31	seed292312	400	0.495	200	0.151	25	0.069
	31	seed302688	600	0.206	140	0.446	50	0.179
	31	seed304663	400	0.083	90	0.471	30	0.023
	31	seed316607	550	0.047	120	0.492	20	0.47
	31	seed39995	700	0.118	170	0.177	20	0.051
	31	seed456078	300	0.171	140	0.254	20	0.227
	31	seed45769	750	0.138	150	0.023	25	0.461
	31	seed507291	700	0.08	160	0.189	10	0.288
	31	seed514247	250	0.066	160	0.086	45	0.352
	31	seed525684	300	0.21	180	0.012	25	0.035
	31	seed544969	400	0.492	80	0.119	35	0.446
	31	seed609274	300	0.439	100	0.312	40	0.14
	31	seed622299	500	0.359	90	0.058	25	0.45
	31	seed623378	600	0.292	180	0.019	10	0.346
	31	seed640308	750	0.43	70	0.136	40	0.437
	31	seed666079	450	0.114	180	0.191	35	0.247
	31	seed693585	500	0.454	190	0.105	15	0.4
	31	seed759645	550	0.096	140	0.483	35	0.493
	31	seed807321	750	0.375	170	0.196	10	0.476
	31	seed810579	200	0.207	190	0.047	30	0.019
	31	seed831322	450	0.132	50	0.046	35	0.218
	31	seed837284	650	0.169	170	0.482	10	0.243
	31	seed860912	750	0.032	80	0.363	35	0.445
	31	seed914634	750	0.079	170	0.164	25	0.061
	31	seed923422	300	0.262	140	0.066	50	0.328
	31	seed9496	650	0.047	100	0.31	35	0.153
	31	seed992113	300	0.02	160	0.438	30	0.203
	32	seed113704	250	0.367	130	0.1	20	0.475
	32	seed159043	450	0.188	110	0.306	20	0.012
	32	seed181091	300	0.057	200	0.123	45	0.217
	32	seed186720	750	0.443	100	0.403	30	0.171
	32	seed201241	550	0.216	90	0.04	15	0.213
	32	seed218795	500	0.432	130	0.29	50	0.274
	32	seed232222	700	0.2	150	0.006	50	0.27
	32	seed232549	600	0.49	190	0.084	35	0.446
	32	seed258801	300	0.378	180	0.055	35	0.154
	32	seed265179	500	0.069	190	0.193	50	0.383
	32	seed266817	550	0.292	50	0.448	10	0.201
	32	seed282731	700	0.148	110	0.142	10	0.48
	32	seed286219	200	0.453	190	0.248	40	0.176
	32	seed292312	600	0.363	180	0.211	35	0.245
	32	seed302688	200	0.434	140	0.043	35	0.465
	32	seed304663	600	0.167	100	0.072	10	0.256
	32	seed316607	200	0.263	150	0.088	10	0.011
	32	seed39995	700	0.47	190	0.024	50	0.28
	32	seed456078	300	0.446	200	0.006	35	0.151
	32	seed45769	200	0.185	140	0.452	50	0.213
	32	seed507291	750	0.294	130	0.495	10	0.027
	32	seed514247	450	0.296	160	0.445	15	0.172
	32	seed525684	200	0.373	80	0.155	40	0.44
	32	seed544969	200	0.299	180	0.23	40	0.162
	32	seed609274	500	0.059	140	0.147	25	0.48
	32	seed622299	300	0.109	50	0.265	50	0.445
	32	seed623378	700	0.175	200	0.069	10	0.226
	32	seed640308	650	0.442	170	0.05	20	0.327
	32	seed666079	550	0.132	190	0.325	35	0.37
	32	seed693585	250	0.329	170	0.447	50	0.232
	32	seed759645	500	0.407	170	0.435	30	0.392
	32	seed807321	650	0.34	160	0.267	10	0.087
	32	seed810579	200	0.188	150	0.234	40	0.338
	32	seed831322	550	0.25	140	0.279	10	0.448
	32	seed837284	500	0.497	100	0.307	20	0.287
	32	seed860912	400	0.024	110	0.352	15	0.026
	32	seed914634	550	0.321	180	0.271	40	0.297
	32	seed923422	300	0.008	190	0.339	50	0.42
	32	seed9496	450	0.045	80	0.419	15	0.09
	32	seed992113	600	0.206	110	0.437	45	0.131
	33	seed113704	400	0.045	150	0.219	15	0.08
	33	seed159043	600	0.113	70	0.406	25	0.157
	33	seed181091	500	0.43	90	0.048	20	0.34
	33	seed186720	350	0.418	160	0.325	25	0.034
	33	seed201241	450	0.138	170	0.303	25	0.134
	33	seed218795	650	0.192	170	0.296	20	0.489
	33	seed232222	700	0.443	180	0.206	35	0.209
	33	seed232549	250	0.181	50	0.011	30	0.048	0.537881	0.666044	0.595141
	33	seed258801	750	0.492	90	0.108	45	0.363
	33	seed265179	200	0.101	160	0.006	35	0.487
	33	seed266817	350	0.153	110	0.411	15	0.36
	33	seed282731	250	0.135	160	0.417	45	0.299
	33	seed286219	700	0.445	90	0.269	25	0.294
	33	seed292312	550	0.361	50	0.177	30	0.374
	33	seed302688	750	0.415	100	0.425	20	0.317
	33	seed304663	200	0.039	80	0.273	25	0.42
	33	seed316607	700	0.142	80	0.087	30	0.339
	33	seed39995	300	0.212	170	0.346	45	0.277
	33	seed456078	750	0.113	130	0.203	20	0.003
	33	seed45769	550	0.256	170	0.204	20	0.143
	33	seed507291	300	0.213	180	0.086	30	0.382
	33	seed514247	300	0.25	60	0.312	10	0.481
	33	seed525684	700	0.168	140	0.093	15	0.153
	33	seed544969	650	0.484	200	0.313	40	0.215
	33	seed609274	650	0.221	180	0.309	40	0.396
	33	seed622299	500	0.426	120	0.446	20	0.395
	33	seed623378	600	0.483	170	0.187	30	0.034
	33	seed640308	450	0.333	190	0.357	10	0.055
	33	seed666079	450	0.078	130	0.204	10	0.214
	33	seed693585	350	0.445	140	0.09	40	0.189
	33	seed759645	750	0.249	110	0.308	35	0.226
	33	seed807321	550	0.455	130	0.359	40	0.488
	33	seed810579	450	0.474	180	0.208	10	0.438
	33	seed831322	250	0.398	180	0.115	25	0.069
	33	seed837284	400	0.156	80	0.367	10	0.422
	33	seed860912	250	0.24	160	0.451	20	0.283
	33	seed914634	250	0.091	190	0.256	40	0.458
	33	seed923422	250	0.418	190	0.427	35	0.441
	33	seed9496	200	0.03	100	0.033	25	0.208
	33	seed992113	400	0.002	180	0.281	30	0.095
	34	seed113704	600	0.456	190	0.118	40	0.196
	34	seed159043	550	0.347	100	0.023	45	0.375
	34	seed181091	200	0.228	150	0.214	20	0.281
	34	seed186720	300	0.476	60	0.275	20	0.474
	34	seed201241	550	0.498	170	0.285	40	0.442
	34	seed218795	350	0.311	50	0.462	15	0.371
	34	seed232222	750	0.245	110	0.179	20	0.19
	34	seed232549	650	0.447	180	0.137	35	0.192
	34	seed258801	500	0.282	50	0.176	30	0.157
	34	seed265179	550	0.182	130	0.196	50	0.302
	34	seed266817	250	0.372	100	0.003	50	0.29
	34	seed282731	600	0.353	60	0.071	35	0.467
	34	seed286219	250	0.345	70	0.412	25	0.5
	34	seed292312	200	0.278	50	0.197	20	0.423
	34	seed302688	200	0.411	200	0.152	25	0.395
	34	seed304663	650	0.121	170	0.044	15	0.243
	34	seed316607	250	0.175	90	0.342	45	0.405
	34	seed39995	200	0.296	70	0.364	25	0.263
	34	seed456078	450	0.179	70	0.5	15	0.395
	34	seed45769	750	0.382	140	0.076	20	0.14
	34	seed507291	200	0.369	130	0.304	20	0.385
	34	seed514247	450	0.248	180	0.427	45	0.003
	34	seed525684	350	0.085	110	0.01	20	0.384
	34	seed544969	300	0.142	70	0.443	50	0.434
	34	seed609274	500	0.309	80	0.379	20	0.442
	34	seed622299	700	0.329	100	0.042	35	0.431
	34	seed623378	250	0.237	120	0.257	50	0.318
	34	seed640308	350	0.272	110	0.491	40	0.218
	34	seed666079	500	0.156	60	0.068	40	0.013
	34	seed693585	650	0.409	140	0.195	35	0.082	0.515924	0.702099	0.594783
	34	seed759645	600	0.401	190	0.291	50	0.023
	34	seed807321	650	0.028	170	0.464	15	0.065
	34	seed810579	350	0.043	150	0.231	25	0.458
	34	seed831322	450	0.215	120	0.14	20	0.343
	34	seed837284	750	0.329	50	0.117	45	0.314
	34	seed860912	250	0.226	70	0.06	30	0.318	0.528495	0.67343	0.592224
	34	seed914634	250	0.18	100	0.013	35	0.093
	34	seed923422	250	0.46	110	0.279	15	0.265
	34	seed9496	500	0.211	120	0.342	20	0.054
	34	seed992113	750	0.13	150	0.282	15	0.322
	35	seed113704	550	0.291	200	0.398	20	0.444
	35	seed159043	450	0.342	110	0.196	10	0.017	0.531847	0.678281	0.596204
	35	seed181091	650	0.182	190	0.014	35	0.475
	35	seed186720	250	0.083	90	0.056	15	0.412
	35	seed201241	300	0.117	90	0.222	50	0.173
	35	seed218795	650	0.102	50	0.143	40	0.162
	35	seed232222	600	0.451	60	0.211	30	0.3
	35	seed232549	300	0.372	130	0.001	40	0.058
	35	seed258801	400	0.116	180	0.067	45	0.49
	35	seed265179	650	0.04	180	0.42	25	0.293
	35	seed266817	350	0.163	50	0.201	50	0.478
	35	seed282731	600	0.054	140	0.327	25	0.448
	35	seed286219	600	0.015	160	0.442	35	0.432
	35	seed292312	250	0.017	200	0.085	50	0.041
	35	seed302688	550	0.02	150	0.3	50	0.104
	35	seed304663	600	0.238	120	0.21	50	0.099
	35	seed316607	250	0.238	120	0.336	35	0.411
	35	seed39995	550	0.135	180	0.412	50	0.014
	35	seed456078	450	0.278	80	0.136	45	0.009	0.539725	0.665427	0.59602
	35	seed45769	650	0.153	80	0.069	10	0.116
	35	seed507291	400	0.214	110	0.43	30	0.106
	35	seed514247	200	0.112	160	0.367	15	0.019
	35	seed525684	200	0.036	180	0.24	25	0.115
	35	seed544969	600	0.166	130	0.498	50	0.424
	35	seed609274	600	0.042	100	0.071	50	0.029
	35	seed622299	600	0.202	100	0.382	10	0.06
	35	seed623378	300	0.442	190	0.485	35	0.091
	35	seed640308	250	0.422	180	0.45	10	0.244
	35	seed666079	550	0.095	80	0.102	25	0.064
	35	seed693585	350	0.486	180	0.44	35	0.368
	35	seed759645	600	0.081	70	0.227	35	0.153
	35	seed807321	250	0.017	100	0.132	30	0.094	0.544251	0.66333	0.597919
	35	seed810579	600	0.309	170	0.308	25	0.493
	35	seed831322	200	0.443	200	0.204	20	0.215
	35	seed837284	250	0.246	160	0.414	35	0.105
	35	seed860912	700	0.438	50	0.482	15	0.146
	35	seed914634	600	0.194	200	0.244	50	0.243
	35	seed923422	650	0.261	120	0.458	10	0.24
	35	seed9496	200	0.329	60	0.228	20	0.139
	35	seed992113	600	0.076	180	0.146	15	0.477
	36	seed113704	250	0.18	180	0.056	20	0.297
	36	seed159043	500	0.264	90	0.023	30	0.267
	36	seed181091	550	0.448	150	0.266	10	0.134
	36	seed186720	650	0.332	60	0.239	35	0.192
	36	seed201241	400	0.096	60	0.218	35	0.028
	36	seed218795	350	0.399	180	0.043	25	0.419
	36	seed232222	550	0.129	170	0.419	50	0.024
	36	seed232549	350	0.008	60	0.413	10	0.41
	36	seed258801	250	0.305	190	0.184	40	0.071
	36	seed265179	250	0.18	140	0.313	35	0.045
	36	seed266817	700	0.49	50	0.027	45	0.037
	36	seed282731	450	0.119	50	0.253	30	0.354
	36	seed286219	700	0.306	70	0.353	40	0.356
	36	seed292312	400	0.361	170	0.448	25	0.435
	36	seed302688	550	0.038	180	0.353	25	0.407
	36	seed304663	550	0.211	50	0.347	35	0.08
	36	seed316607	450	0.449	80	0.139	25	0.137
	36	seed39995	700	0.354	120	0.442	30	0.237
	36	seed456078	350	0.388	170	0.432	20	0.333
	36	seed45769	200	0.49	170	0.005	15	0.35
	36	seed507291	650	0.001	90	0.208	45	0.213
	36	seed514247	600	0.468	130	0.249	45	0.159
	36	seed525684	300	0.141	170	0.096	40	0.077
	36	seed544969	450	0.469	160	0.03	40	0.209
	36	seed609274	450	0.204	110	0.185	50	0.27
	36	seed622299	700	0.031	190	0.344	45	0.368
	36	seed623378	400	0.373	60	0.266	35	0.014
	36	seed640308	400	0.294	90	0.07	45	0.02
	36	seed666079	300	0.036	150	0.195	25	0.316
	36	seed693585	250	0.145	160	0.239	40	0.294
	36	seed759645	550	0.002	140	0.094	30	0.2
	36	seed807321	400	0.159	110	0.259	35	0.147
	36	seed810579	650	0.328	120	0.207	15	0.486
	36	seed831322	650	0.188	70	0.48	35	0.215
	36	seed837284	350	0.284	50	0.2	10	0.386
	36	seed860912	250	0.445	190	0.388	20	0.351
	36	seed914634	250	0.231	70	0.448	30	0.414
	36	seed923422	750	0.043	70	0.25	30	0.186
	36	seed9496	600	0.115	160	0.299	40	0.022
	36	seed992113	550	0.407	200	0.152	20	0.405
	37	seed113704	350	0.141	120	0.228	20	0.432
	37	seed159043	200	0.153	160	0.444	15	0.447
	37	seed181091	500	0.268	160	0.461	40	0.114
	37	seed186720	650	0.339	60	0.398	15	0.466
	37	seed201241	300	0.323	130	0.284	50	0.188
	37	seed218795	700	0.052	190	0.142	15	0.282
	37	seed232222	750	0.152	120	0.076	20	0.28
	37	seed232549	650	0.173	200	0.123	30	0.336
	37	seed258801	250	0.114	130	0.221	40	0.413
	37	seed265179	250	0.377	200	0.363	10	0.144
	37	seed266817	600	0.066	180	0.001	30	0.456
	37	seed282731	750	0.393	120	0.39	40	0.077
	37	seed286219	750	0.105	150	0.486	25	0.058
	37	seed292312	300	0.344	120	0.386	40	0.024
	37	seed302688	650	0.484	50	0.193	15	0.099
	37	seed304663	350	0.48	70	0.334	30	0.419
	37	seed316607	250	0.017	150	0.206	20	0.431
	37	seed39995	200	0.172	120	0.033	40	0.354
	37	seed456078	700	0.397	180	0.287	20	0.057
	37	seed45769	750	0.475	140	0.392	25	0.054
	37	seed507291	200	0.073	70	0.388	25	0.078
	37	seed514247	300	0.424	100	0.278	15	0.11
	37	seed525684	600	0.346	90	0.474	35	0.286
	37	seed544969	350	0.273	110	0.173	40	0.322
	37	seed609274	450	0.238	110	0.221	50	0.376
	37	seed622299	250	0.331	170	0.321	35	0.166
	37	seed623378	200	0.37	80	0.497	20	0.21
	37	seed640308	200	0.403	90	0.247	45	0.158
	37	seed666079	200	0.128	170	0.2	40	0.38
	37	seed693585	450	0.469	170	0.257	40	0.025
	37	seed759645	300	0.099	120	0.023	40	0.461
	37	seed807321	250	0.391	160	0.237	35	0.231
	37	seed810579	600	0.472	150	0.46	10	0.056
	37	seed831322	300	0.116	70	0.032	35	0.039	0.532518	0.668983	0.593
	37	seed837284	700	0.296	100	0.458	30	0.424
	37	seed860912	750	0.059	120	0.389	35	0.336
	37	seed914634	500	0.095	70	0.36	40	0.461
	37	seed923422	700	0.337	150	0.184	20	0.275
	37	seed9496	500	0.129	60	0.235	10	0.337
	37	seed992113	600	0.356	200	0.4	25	0.403
	38	seed113704	250	0.046	200	0.126	45	0.269
	38	seed159043	400	0.358	150	0.277	15	0.018
	38	seed181091	300	0.3	90	0.338	45	0.068
	38	seed186720	300	0.106	180	0.057	40	0.465
	38	seed201241	300	0.137	50	0.106	20	0.043
	38	seed218795	200	0.194	140	0.036	20	0.247
	38	seed232222	650	0.008	100	0.447	45	0.197
	38	seed232549	500	0.301	120	0.295	35	0.385
	38	seed258801	350	0.294	100	0.18	30	0.497
	38	seed265179	250	0.009	160	0.023	20	0.161
	38	seed266817	600	0.026	80	0.075	40	0.382
	38	seed282731	700	0.023	170	0.412	20	0.462
	38	seed286219	650	0.327	50	0.151	20	0.476
	38	seed292312	350	0.184	170	0.131	45	0.178
	38	seed302688	250	0.038	90	0.412	35	0.405
	38	seed304663	550	0.101	150	0.147	15	0.46
	38	seed316607	600	0.073	80	0.31	35	0.258
	38	seed39995	600	0.407	170	0.416	50	0.365
	38	seed456078	200	0.412	90	0.219	30	0.142
	38	seed45769	650	0.014	50	0.498	50	0.085
	38	seed507291	300	0.237	60	0.438	45	0.063
	38	seed514247	750	0.22	200	0.347	15	0.484
	38	seed525684	750	0.316	80	0.146	30	0.19
	38	seed544969	750	0.217	140	0.193	35	0.221
	38	seed609274	400	0.2	70	0.139	15	0.052
	38	seed622299	550	0.102	180	0.238	30	0.288
	38	seed623378	400	0.484	100	0.302	40	0.175
	38	seed640308	400	0.386	100	0.171	45	0.471
	38	seed666079	200	0.431	190	0.348	10	0.274
	38	seed693585	600	0.302	120	0.42	35	0.256
	38	seed759645	600	0.074	190	0.253	10	0.406
	38	seed807321	300	0.347	80	0.429	50	0.052
	38	seed810579	500	0.249	180	0.33	20	0.39
	38	seed831322	500	0.171	60	0.431	20	0.097
	38	seed837284	400	0.008	80	0.06	25	0.475
	38	seed860912	600	0.417	190	0.347	15	0.091
	38	seed914634	650	0.386	180	0.374	10	0.315
	38	seed923422	550	0.34	130	0.187	35	0.348
	38	seed9496	200	0.302	60	0.19	30	0.432
	38	seed992113	750	0.208	160	0.314	10	0.092
	39	seed113704	350	0.03	160	0.152	10	0.21
	39	seed159043	650	0.189	150	0.351	20	0.29
	39	seed181091	700	0.216	120	0.309	30	0.471
	39	seed186720	500	0.253	170	0.181	25	0.479
	39	seed201241	450	0.185	180	0.269	50	0.061
	39	seed218795	200	0.043	70	0.05	30	0.299
	39	seed232222	500	0.422	170	0.267	30	0.221
	39	seed232549	400	0.094	50	0.22	30	0.443
	39	seed258801	750	0.354	90	0.089	25	0.469
	39	seed265179	500	0.373	60	0.123	35	0.408
	39	seed266817	700	0.366	110	0.361	30	0.226
	39	seed282731	550	0.314	170	0.292	10	0.334
	39	seed286219	750	0.308	160	0.376	30	0.451
	39	seed292312	400	0.489	120	0.326	15	0.416
	39	seed302688	450	0.168	90	0.011	15	0.333
	39	seed304663	350	0.037	120	0.103	50	0.346
	39	seed316607	750	0.278	90	0.087	20	0.116
	39	seed39995	250	0.456	140	0.135	30	0.469
	39	seed456078	400	0.351	140	0.113	20	0.209
	39	seed45769	550	0.337	120	0.431	45	0.474
	39	seed507291	450	0.217	50	0.286	30	0.463
	39	seed514247	750	0.497	190	0.339	15	0.221
	39	seed525684	450	0.449	140	0.135	10	0.018	0.504526	0.712932	0.590891
	39	seed544969	650	0.135	90	0.375	50	0.464
	39	seed609274	250	0.22	100	0.133	35	0.289
	39	seed622299	750	0.239	80	0.041	25	0.178
	39	seed623378	700	0.27	80	0.049	10	0.484
	39	seed640308	200	0.089	150	0.494	50	0.227
	39	seed666079	700	0.344	150	0.165	40	0.345
	39	seed693585	250	0.26	120	0.411	45	0.282
	39	seed759645	300	0.319	200	0.289	45	0.088
	39	seed807321	650	0.441	180	0.074	25	0.096
	39	seed810579	350	0.317	160	0.179	30	0.057
	39	seed831322	650	0.434	100	0.434	50	0.261
	39	seed837284	600	0.172	120	0.435	15	0.497
	39	seed860912	700	0.13	180	0.456	45	0.194
	39	seed914634	750	0.416	100	0.308	10	0.284
	39	seed923422	250	0.116	190	0.306	30	0.356
	39	seed9496	400	0.442	80	0.463	40	0.1
	39	seed992113	350	0.497	70	0.008	20	0.191	0.543748	0.685256	0.606355
	4	seed113704	300	0.035	70	0.299	50	0.133
	4	seed159043	600	0.283	140	0.054	30	0.397
	4	seed181091	700	0.123	60	0.219	30	0.408
	4	seed186720	700	0.358	100	0.38	20	0.014
	4	seed201241	550	0.336	80	0.227	30	0.47
	4	seed218795	600	0.412	100	0.099	50	0.278
	4	seed232222	750	0.373	180	0.071	40	0.132
	4	seed232549	700	0.459	170	0.057	15	0.435
	4	seed258801	400	0.433	90	0.367	40	0.368
	4	seed265179	550	0.11	70	0.063	20	0.278
	4	seed266817	350	0.282	200	0.038	45	0.253
	4	seed282731	400	0.22	100	0.051	45	0.321
	4	seed286219	500	0.385	170	0.013	10	0.29
	4	seed292312	600	0.294	180	0.393	10	0.16
	4	seed302688	200	0.314	160	0.414	10	0.023
	4	seed304663	450	0.454	70	0.002	10	0.259
	4	seed316607	250	0.407	190	0.15	30	0.45
	4	seed39995	250	0.154	80	0.212	10	0.466
	4	seed456078	650	0.36	90	0.257	30	0.105
	4	seed45769	650	0.319	110	0.347	25	0.115
	4	seed507291	700	0.116	60	0.171	50	0.462
	4	seed514247	600	0.454	160	0.001	15	0.161	0.541066	0.650413	0.590722
	4	seed525684	650	0.06	70	0.075	15	0.374
	4	seed544969	450	0.457	100	0.155	20	0.106
	4	seed609274	650	0.444	200	0.14	35	0.344
	4	seed622299	750	0.014	160	0.266	50	0.113
	4	seed623378	450	0.16	50	0.378	40	0.415	0.557157	0.65887	0.60376
	4	seed640308	300	0.157	100	0.044	45	0.126
	4	seed666079	550	0.104	170	0.234	25	0.19
	4	seed693585	600	0.418	180	0.378	50	0.467
	4	seed759645	500	0.028	120	0.038	50	0.225
	4	seed807321	450	0.267	120	0.093	10	0.224
	4	seed810579	250	0.224	60	0.443	15	0.211
	4	seed831322	400	0.156	90	0.293	20	0.207
	4	seed837284	450	0.147	50	0.41	15	0.285
	4	seed860912	700	0.489	130	0.343	25	0.233
	4	seed914634	350	0.153	50	0.067	25	0.469
	4	seed923422	450	0.086	190	0.181	40	0.282
	4	seed9496	600	0.185	50	0.092	35	0.472
	4	seed992113	200	0.205	140	0.368	20	0.362
	40	seed113704	750	0.438	130	0.488	10	0.452
	40	seed159043	250	0.036	150	0.009	30	0.252
	40	seed181091	600	0.269	150	0.384	45	0.402
	40	seed186720	250	0.081	80	0.01	25	0.349
	40	seed201241	650	0.499	130	0.321	45	0.071
	40	seed218795	300	0.013	110	0.445	25	0.297
	40	seed232222	700	0.328	170	0.021	50	0.199
	40	seed232549	550	0.489	140	0.463	40	0.143
	40	seed258801	750	0.243	60	0.167	35	0.058	0.532182	0.690217	0.600984
	40	seed265179	550	0.269	180	0.313	50	0.486
	40	seed266817	700	0.26	80	0.077	50	0.047	0.543916	0.687354	0.60728
	40	seed282731	350	0.047	80	0.386	40	0.053
	40	seed286219	200	0.192	60	0.267	40	0.441
	40	seed292312	300	0.455	100	0.008	50	0.458
	40	seed302688	500	0.278	160	0.077	15	0.303
	40	seed304663	250	0.165	90	0.179	50	0.486
	40	seed316607	400	0.201	180	0.258	10	0.307
	40	seed39995	450	0.061	110	0.485	40	0.405
	40	seed456078	600	0.264	90	0.275	30	0.3
	40	seed45769	600	0.39	60	0.206	25	0.014
	40	seed507291	450	0.161	60	0.275	30	0.434
	40	seed514247	250	0.16	110	0.466	10	0.139
	40	seed525684	400	0.05	90	0.268	35	0.24
	40	seed544969	350	0.468	160	0.095	50	0.396
	40	seed609274	450	0.086	50	0.125	50	0.154
	40	seed622299	250	0.056	160	0.212	15	0.333
	40	seed623378	500	0.422	130	0.145	25	0.089
	40	seed640308	350	0.385	150	0.123	35	0.113
	40	seed666079	300	0.002	50	0.404	25	0.069
	40	seed693585	250	0.458	200	0.112	25	0.206
	40	seed759645	450	0.483	70	0.263	35	0.3
	40	seed807321	650	0.305	50	0.227	20	0.266
	40	seed810579	500	0.338	80	0.312	45	0.39
	40	seed831322	650	0.171	110	0.317	40	0.071
	40	seed837284	450	0.403	160	0.472	40	0.25
	40	seed860912	250	0.445	60	0.159	50	0.493
	40	seed914634	350	0.458	180	0.072	10	0.166
	40	seed923422	450	0.055	60	0.034	10	0.139
	40	seed9496	300	0.294	120	0.186	10	0.146
	40	seed992113	250	0.265	80	0.247	15	0.356
	41	seed113704	400	0.231	80	0.481	10	0.097
	41	seed159043	350	0.498	70	0.12	45	0.172
	41	seed181091	550	0.113	200	0.455	25	0.385
	41	seed186720	350	0.155	60	0.269	50	0.105
	41	seed201241	550	0.093	80	0.089	35	0.2
	41	seed218795	600	0.24	190	0.396	25	0.286
	41	seed232222	300	0.021	200	0.087	15	0.044
	41	seed232549	450	0.229	120	0.42	50	0.089
	41	seed258801	650	0.486	130	0.228	10	0.097
	41	seed265179	300	0.287	190	0.012	50	0.144
	41	seed266817	600	0.217	160	0.18	25	0.052
	41	seed282731	750	0.168	180	0.442	25	0.342
	41	seed286219	350	0.436	50	0.416	15	0.212
	41	seed292312	400	0.259	110	0.391	50	0.133
	41	seed302688	600	0.282	180	0.499	25	0.243
	41	seed304663	650	0.225	180	0.086	20	0.223
	41	seed316607	400	0.401	50	0.282	40	0.012
	41	seed39995	650	0.081	140	0.428	10	0.023
	41	seed456078	600	0.04	80	0.122	30	0.037
	41	seed45769	400	0.371	80	0.211	25	0.018
	41	seed507291	250	0.496	50	0.475	35	0.052
	41	seed514247	550	0.069	200	0.272	20	0.354
	41	seed525684	750	0.045	90	0.096	40	0.04
	41	seed544969	700	0.392	90	0.204	40	0.063
	41	seed609274	200	0.137	90	0.099	35	0.342
	41	seed622299	500	0.255	60	0.203	10	0.335
	41	seed623378	500	0.173	90	0.076	35	0.173
	41	seed640308	350	0.055	200	0.137	20	0.459
	41	seed666079	700	0.237	150	0.268	10	0.414
	41	seed693585	200	0.107	90	0.038	25	0.014
	41	seed759645	450	0.063	120	0.106	50	0.203
	41	seed807321	450	0.083	80	0.239	20	0.315
	41	seed810579	300	0.407	120	0.174	25	0.076
	41	seed831322	750	0.492	200	0.075	20	0.418
	41	seed837284	300	0.245	110	0.482	20	0.212
	41	seed860912	550	0.009	130	0.281	10	0.485
	41	seed914634	400	0.299	150	0.352	10	0.31
	41	seed923422	300	0.168	60	0.409	30	0.292
	41	seed9496	550	0.481	50	0.191	25	0.361
	41	seed992113	650	0.209	180	0.053	40	0.052
	42	seed113704	200	0.027	80	0.386	10	0.139
	42	seed159043	500	0.28	170	0.469	40	0.241
	42	seed181091	700	0.361	180	0.213	30	0.461
	42	seed186720	600	0.211	140	0.386	20	0.281
	42	seed201241	700	0.468	50	0.308	15	0.075
	42	seed218795	600	0.355	150	0.438	10	0.004
	42	seed232222	350	0.186	120	0.31	10	0.266
	42	seed232549	200	0.121	130	0.374	35	0.031
	42	seed258801	300	0.328	100	0.04	15	0.111
	42	seed265179	750	0.398	110	0.475	25	0.45
	42	seed266817	550	0.413	90	0.235	45	0.487
	42	seed282731	650	0.428	50	0.422	15	0.246	0.535199	0.677488	0.597996
	42	seed286219	200	0.218	150	0.219	50	0.256
	42	seed292312	400	0.354	170	0.064	35	0.24
	42	seed302688	750	0.129	190	0.434	45	0.047
	42	seed304663	650	0.346	50	0.265	15	0.003
	42	seed316607	200	0.407	200	0.154	15	0.173
	42	seed39995	500	0.471	120	0.158	30	0.164
	42	seed456078	700	0.096	70	0.479	40	0.237
	42	seed45769	300	0.465	110	0.055	30	0.096	0.541401	0.656104	0.593259
	42	seed507291	600	0.025	100	0.001	15	0.336
	42	seed514247	250	0.309	50	0.051	15	0.036
	42	seed525684	600	0.113	170	0.139	20	0.384
	42	seed544969	600	0.017	120	0.085	15	0.14
	42	seed609274	200	0.141	80	0.334	50	0.411
	42	seed622299	400	0.097	110	0.043	10	0.327
	42	seed623378	600	0.047	140	0.251	35	0.091
	42	seed640308	400	0.251	200	0.367	10	0.174
	42	seed666079	650	0.247	110	0.029	50	0.012
	42	seed693585	600	0.197	180	0.394	40	0.082
	42	seed759645	550	0.419	200	0.448	25	0.237
	42	seed807321	450	0.288	140	0.407	40	0.339
	42	seed810579	650	0.432	50	0.106	25	0.011	0.533859	0.670668	0.594494
	42	seed831322	750	0.291	50	0.453	30	0.46
	42	seed837284	550	0.261	130	0.072	40	0.417
	42	seed860912	250	0.209	170	0.121	30	0.411
	42	seed914634	600	0.036	120	0.428	30	0.127
	42	seed923422	650	0.449	190	0.434	20	0.487
	42	seed9496	650	0.466	80	0.375	45	0.256
	42	seed992113	300	0.346	190	0.272	40	0.457
	43	seed113704	400	0.099	140	0.061	30	0.421
	43	seed159043	600	0.09	80	0.083	30	0.341
	43	seed181091	750	0.105	120	0.303	45	0.292
	43	seed186720	500	0.208	130	0.249	15	0.478
	43	seed201241	550	0.431	200	0.379	40	0.261
	43	seed218795	350	0.381	180	0.436	20	0.02
	43	seed232222	300	0.353	80	0.296	35	0.308
	43	seed232549	450	0.188	170	0.133	45	0.119
	43	seed258801	650	0.394	80	0.186	45	0.43
	43	seed265179	250	0.366	160	0.171	40	0.49
	43	seed266817	350	0.044	60	0.202	40	0.001
	43	seed282731	500	0.067	60	0.015	35	0.226
	43	seed286219	300	0.294	120	0.341	30	0.136
	43	seed292312	350	0.298	90	0.285	15	0.391
	43	seed302688	500	0.226	120	0.41	50	0.268
	43	seed304663	700	0.281	200	0.195	35	0.46
	43	seed316607	350	0.184	200	0.192	15	0.437
	43	seed39995	500	0.149	120	0.285	15	0.32
	43	seed456078	550	0.077	130	0.109	30	0.373
	43	seed45769	650	0.404	130	0.328	45	0.197
	43	seed507291	350	0.164	160	0.355	15	0.083
	43	seed514247	650	0.044	60	0.146	30	0.292
	43	seed525684	500	0.249	80	0.379	30	0.175
	43	seed544969	750	0.422	130	0.475	50	0.245
	43	seed609274	550	0.306	60	0.481	15	0.409
	43	seed622299	400	0.36	50	0.265	40	0.174
	43	seed623378	250	0.043	160	0.021	35	0.105
	43	seed640308	550	0.339	140	0.066	40	0.149
	43	seed666079	600	0.281	70	0.403	15	0.116
	43	seed693585	500	0.129	170	0.348	30	0.265
	43	seed759645	700	0.021	60	0.428	35	0.013
	43	seed807321	250	0.232	150	0.465	25	0.22
	43	seed810579	550	0.349	100	0.34	10	0.11
	43	seed831322	350	0.31	180	0.235	25	0.41
	43	seed837284	650	0.098	200	0.435	10	0.416
	43	seed860912	300	0.42	180	0.284	20	0.074
	43	seed914634	200	0.107	80	0.284	35	0.344
	43	seed923422	250	0.31	90	0.085	50	0.116
	43	seed9496	350	0.287	200	0.423	25	0.103
	43	seed992113	500	0.299	120	0.252	40	0.236
	44	seed113704	500	0.062	160	0.498	15	0.441
	44	seed159043	250	0.143	180	0.402	30	0.392
	44	seed181091	550	0.112	200	0.143	35	0.498
	44	seed186720	600	0.298	80	0.159	40	0.401
	44	seed201241	500	0.309	60	0.319	40	0.435
	44	seed218795	300	0.216	120	0.125	45	0.234
	44	seed232222	750	0.326	110	0.279	45	0.173
	44	seed232549	450	0.32	150	0.261	25	0.11
	44	seed258801	450	0.125	140	0.217	10	0.428
	44	seed265179	650	0.054	60	0.009	35	0.132
	44	seed266817	250	0.446	100	0.181	30	0.221
	44	seed282731	600	0.11	140	0.07	40	0.294
	44	seed286219	350	0.146	120	0.19	25	0.022
	44	seed292312	450	0.155	80	0.092	35	0.075
	44	seed302688	300	0.455	80	0.349	30	0.134
	44	seed304663	650	0.022	170	0.028	30	0.421
	44	seed316607	650	0.074	180	0.429	35	0.414
	44	seed39995	300	0.439	150	0.485	20	0.214
	44	seed456078	400	0.349	100	0.174	35	0.398
	44	seed45769	250	0.182	90	0.337	10	0.092
	44	seed507291	650	0.486	90	0.38	30	0.174
	44	seed514247	750	0.188	190	0.221	30	0.209
	44	seed525684	250	0.062	70	0.038	10	0.05
	44	seed544969	650	0.246	150	0.226	15	0.197
	44	seed609274	650	0.34	50	0.458	35	0.372
	44	seed622299	700	0.281	100	0.147	20	0.002	0.536205	0.677324	0.598559
	44	seed623378	350	0.005	70	0.248	10	0.012
	44	seed640308	500	0.14	170	0.435	40	0.343
	44	seed666079	250	0.477	170	0.272	30	0.081
	44	seed693585	250	0.037	120	0.431	40	0.344
	44	seed759645	550	0.336	60	0.48	30	0.125
	44	seed807321	600	0.353	50	0.088	20	0.388
	44	seed831322	200	0.09	90	0.483	40	0.307
	44	seed837284	650	0.256	50	0.363	40	0.334
	44	seed860912	400	0.413	190	0.211	40	0.413
	44	seed914634	450	0.033	100	0.217	30	0.263
	44	seed923422	400	0.076	100	0.179	50	0.246
	44	seed9496	400	0.248	70	0.389	50	0.208
	44	seed992113	250	0.329	110	0.048	20	0.275
	45	seed113704	250	0.128	180	0.474	25	0.16
	45	seed159043	400	0.136	50	0.064	20	0.401
	45	seed181091	200	0.018	130	0.314	20	0.092
	45	seed186720	250	0.036	190	0.288	45	0.348
	45	seed201241	200	0.44	130	0.345	50	0.054
	45	seed218795	250	0.044	70	0.268	20	0.074
	45	seed232222	400	0.333	150	0.132	30	0.409
	45	seed232549	400	0.091	200	0.225	30	0.473
	45	seed258801	300	0.325	170	0.131	25	0.432
	45	seed265179	350	0.211	60	0.438	20	0.284
	45	seed266817	550	0.38	60	0.29	10	0.192
	45	seed282731	550	0.327	70	0.316	20	0.264
	45	seed286219	350	0.215	70	0.294	25	0.245
	45	seed292312	300	0.124	200	0.032	35	0.345
	45	seed302688	400	0.463	130	0.21	15	0.475
	45	seed304663	550	0.133	190	0.168	20	0.028
	45	seed316607	650	0.166	160	0.132	15	0.366
	45	seed39995	700	0.131	140	0.452	20	0.066
	45	seed456078	300	0.475	140	0.431	25	0.097
	45	seed45769	300	0.11	180	0.347	45	0.065
	45	seed507291	700	0.329	180	0.083	50	0.118
	45	seed514247	750	0.087	100	0.038	10	0.459
	45	seed525684	500	0.342	100	0.171	30	0.41
	45	seed544969	200	0.197	150	0.05	15	0.473
	45	seed609274	500	0.001	160	0.401	40	0.33
	45	seed622299	400	0.235	200	0.347	25	0.166
	45	seed623378	550	0.354	170	0.474	40	0.467
	45	seed640308	350	0.489	70	0.09	30	0.497
	45	seed666079	350	0.409	120	0.088	30	0.269
	45	seed693585	300	0.094	160	0.499	40	0.315
	45	seed759645	250	0.011	110	0.499	40	0.32
	45	seed807321	350	0.125	130	0.442	35	0.149
	45	seed831322	450	0.016	150	0.198	40	0.26
	45	seed837284	750	0.371	200	0.07	45	0.036	0.562689	0.647569	0.602152
	45	seed860912	200	0.468	150	0.393	35	0.149
	45	seed914634	700	0.093	50	0.354	50	0.106
	45	seed923422	650	0.133	150	0.476	40	0.246
	45	seed9496	550	0.379	50	0.264	20	0.483
	45	seed992113	350	0.354	160	0.486	25	0.016
	46	seed113704	200	0.296	80	0.411	50	0.272
	46	seed159043	400	0.171	140	0.47	15	0.383
	46	seed181091	250	0.214	90	0.049	40	0.094
	46	seed186720	450	0.373	170	0.278	30	0.004
	46	seed201241	250	0.012	60	0.364	35	0.253
	46	seed218795	350	0.48	90	0.26	50	0.146
	46	seed232222	500	0.232	50	0.352	40	0.34
	46	seed232549	450	0.203	190	0.297	25	0.08
	46	seed258801	650	0.416	190	0.483	35	0.076
	46	seed265179	700	0.442	150	0.367	15	0.129
	46	seed266817	700	0.126	160	0.195	20	0.29
	46	seed282731	400	0.055	90	0.2	30	0.135
	46	seed286219	650	0.386	110	0.207	20	0.101
	46	seed292312	550	0.337	70	0.355	50	0.002
	46	seed302688	750	0.334	160	0.417	10	0.069
	46	seed304663	550	0.116	100	0.437	35	0.232
	46	seed316607	400	0.43	150	0.226	10	0.206
	46	seed39995	600	0.439	110	0.476	15	0.164	0.540228	0.654416	0.591865
	46	seed456078	200	0.108	140	0.499	25	0.452
	46	seed45769	700	0.053	100	0.261	50	0.333
	46	seed507291	650	0.014	190	0.313	20	0.497
	46	seed514247	300	0.104	90	0.054	45	0.34
	46	seed525684	300	0.312	170	0.474	20	0.439
	46	seed544969	450	0.341	140	0.05	45	0.498
	46	seed609274	550	0.305	120	0.271	30	0.161
	46	seed622299	400	0.253	140	0.14	50	0.448
	46	seed623378	650	0.313	190	0.067	20	0.169
	46	seed640308	250	0.37	190	0.234	45	0.276
	46	seed666079	600	0.07	80	0.347	35	0.306
	46	seed693585	600	0.2	130	0.261	25	0.174
	46	seed759645	250	0.166	150	0.129	15	0.187
	46	seed807321	200	0.355	80	0.41	10	0.306
	46	seed831322	600	0.004	150	0.149	40	0.301
	46	seed837284	200	0.397	140	0.343	40	0.037
	46	seed860912	300	0.245	70	0.368	50	0.087
	46	seed914634	550	0.168	200	0.168	30	0.305
	46	seed923422	200	0.006	140	0.244	10	0.208
	46	seed9496	350	0.139	120	0.078	35	0.225
	46	seed992113	250	0.343	70	0.195	15	0.388
	47	seed113704	400	0.254	170	0.2	30	0.201
	47	seed159043	450	0.442	180	0.18	50	0.008	0.520449	0.686036	0.59188
	47	seed181091	350	0.35	50	0.5	35	0.106
	47	seed186720	350	0.34	70	0.174	50	0.251
	47	seed201241	650	0.426	60	0.29	30	0.094
	47	seed218795	250	0.249	110	0.43	35	0.361
	47	seed232222	700	0.088	200	0.394	15	0.357
	47	seed232549	450	0.221	170	0.4	45	0.343
	47	seed258801	650	0.246	140	0.284	10	0.071
	47	seed265179	300	0.045	80	0.482	15	0.134
	47	seed266817	650	0.038	120	0.443	15	0.11
	47	seed282731	500	0.392	200	0.444	50	0.291
	47	seed286219	600	0.444	90	0.163	50	0.205
	47	seed292312	600	0.412	180	0.486	20	0.448
	47	seed302688	350	0.014	80	0.133	35	0.2
	47	seed304663	700	0.113	200	0.156	30	0.247
	47	seed316607	650	0.257	180	0.316	10	0.459
	47	seed39995	400	0.352	190	0.255	15	0.399
	47	seed456078	350	0.268	200	0.138	40	0.227
	47	seed45769	700	0.121	170	0.345	15	0.385
	47	seed507291	300	0.022	180	0.33	50	0.367
	47	seed514247	450	0.204	170	0.161	20	0.233
	47	seed525684	750	0.244	70	0.014	30	0.292
	47	seed544969	300	0.137	70	0.251	40	0.169
	47	seed609274	300	0.113	150	0.189	20	0.335
	47	seed622299	350	0.035	80	0.343	15	0.286
	47	seed623378	450	0.347	190	0.434	15	0.191
	47	seed640308	600	0.482	120	0.14	20	0.409
	47	seed666079	500	0.231	190	0.067	30	0.485
	47	seed693585	700	0.104	110	0.26	50	0.312
	47	seed759645	450	0.166	50	0.129	50	0.305
	47	seed807321	500	0.086	170	0.139	35	0.274
	47	seed831322	650	0.308	70	0.093	30	0.134	0.524472	0.708881	0.60289
	47	seed837284	500	0.091	100	0.464	35	0.341
	47	seed860912	700	0.088	200	0.241	25	0.347
	47	seed914634	600	0.228	150	0.435	20	0.22
	47	seed923422	400	0.295	90	0.457	10	0.226
	47	seed9496	300	0.394	200	0.458	50	0.088
	47	seed992113	550	0.127	60	0.314	40	0.22
	48	seed113704	500	0.475	150	0.39	20	0.25
	48	seed159043	250	0.046	80	0.355	30	0.035
	48	seed181091	650	0.338	80	0.331	45	0.047
	48	seed186720	400	0.035	180	0.065	10	0.497
	48	seed201241	300	0.046	110	0.398	35	0.407
	48	seed218795	400	0.237	100	0.23	10	0.431
	48	seed232222	700	0.494	170	0.198	10	0.076	0.538887	0.664393	0.595095
	48	seed232549	400	0.224	70	0.381	30	0.185
	48	seed258801	600	0.262	140	0.082	50	0.154
	48	seed265179	400	0.227	70	0.055	30	0.413
	48	seed266817	700	0.133	90	0.064	35	0.142
	48	seed282731	700	0.483	130	0.107	30	0.365
	48	seed286219	200	0.009	60	0.164	15	0.287
	48	seed292312	200	0.224	140	0.047	40	0.147
	48	seed302688	750	0.11	70	0.406	45	0.252
	48	seed304663	450	0.293	190	0.264	10	0.236
	48	seed316607	450	0.498	50	0.303	40	0.184
	48	seed39995	700	0.275	70	0.04	20	0.221
	48	seed456078	600	0.482	80	0.469	20	0.091
	48	seed45769	200	0.311	200	0.057	20	0.409
	48	seed507291	500	0.088	80	0.015	35	0.219
	48	seed514247	450	0.049	50	0.145	50	0.396
	48	seed525684	250	0.06	170	0.028	40	0.446
	48	seed544969	650	0.414	200	0.413	35	0.468
	48	seed609274	500	0.311	110	0.494	35	0.002
	48	seed622299	300	0.17	140	0.303	50	0.367
	48	seed623378	700	0.479	130	0.179	40	0.461
	48	seed640308	600	0.182	50	0.226	10	0.325
	48	seed666079	200	0.337	120	0.056	40	0.095
	48	seed693585	600	0.103	80	0.197	50	0.298
	48	seed759645	400	0.012	100	0.113	35	0.403
	48	seed807321	250	0.383	130	0.087	45	0.235
	48	seed831322	750	0.168	180	0.056	35	0.234
	48	seed837284	750	0.469	130	0.3	10	0.129
	48	seed860912	350	0.388	60	0.43	25	0.051
	48	seed914634	500	0.34	120	0.327	20	0.311
	48	seed923422	350	0.283	140	0.252	35	0.063
	48	seed9496	350	0.268	50	0.463	50	0.022
	48	seed992113	750	0.081	100	0.22	25	0.409
	49	seed113704	300	0.319	80	0.48	45	0.224
	49	seed159043	200	0.07	130	0.164	15	0.014
	49	seed181091	250	0.061	70	0.436	20	0.236
	49	seed186720	650	0.198	190	0.193	25	0.162
	49	seed201241	550	0.357	110	0.23	20	0.105
	49	seed218795	500	0.016	170	0.252	40	0.021
	49	seed232222	650	0.061	150	0.181	50	0.042
	49	seed232549	550	0.112	130	0.16	40	0.453
	49	seed258801	700	0.292	160	0.034	15	0.183
	49	seed265179	200	0.459	200	0.436	25	0.319
	49	seed266817	350	0.299	170	0.48	15	0.007
	49	seed282731	650	0.348	70	0.229	15	0.123
	49	seed286219	450	0.177	100	0.162	35	0.476
	49	seed292312	250	0.407	150	0.323	20	0.087
	49	seed302688	700	0.241	180	0.244	25	0.062
	49	seed304663	700	0.379	120	0.074	20	0.232
	49	seed316607	650	0.126	100	0.062	20	0.302
	49	seed39995	200	0.109	150	0.247	50	0.157
	49	seed456078	600	0.457	100	0.052	30	0.306
	49	seed45769	250	0.117	200	0.037	45	0.398
	49	seed507291	450	0.442	120	0.068	30	0.175
	49	seed514247	400	0.272	130	0.254	15	0.247
	49	seed525684	350	0.205	190	0.022	20	0.19
	49	seed544969	200	0.34	170	0.37	15	0.335
	49	seed609274	200	0.108	60	0.287	45	0.164
	49	seed622299	350	0.481	170	0.305	50	0.292
	49	seed623378	450	0.195	180	0.01	25	0.486
	49	seed640308	300	0.328	170	0.057	35	0.318
	49	seed666079	700	0.32	120	0.178	40	0.234
	49	seed693585	400	0.15	190	0.087	45	0.05
	49	seed759645	200	0.414	70	0.423	20	0.118	0.526483	0.700178	0.601033
	49	seed807321	500	0.235	200	0.113	50	0.263
	49	seed831322	700	0.144	60	0.286	40	0.077
	49	seed837284	450	0.123	130	0.445	30	0.404
	49	seed860912	500	0.246	110	0.2	10	0.219
	49	seed914634	650	0.241	170	0.163	30	0.322
	49	seed923422	500	0.054	120	0.395	20	0.332
	49	seed9496	300	0.08	190	0.161	45	0.226
	49	seed992113	350	0.485	70	0.5	20	0.176
	5	seed113704	450	0.185	50	0.483	45	0.259
	5	seed159043	250	0.006	90	0.32	20	0.289
	5	seed181091	700	0.46	200	0.14	20	0.459
	5	seed186720	550	0.115	100	0.147	25	0.01
	5	seed201241	600	0.367	140	0.324	45	0.41
	5	seed218795	750	0.294	190	0.373	20	0.399
	5	seed232222	400	0.282	120	0.041	50	0.495
	5	seed232549	250	0.247	60	0.303	15	0.192
	5	seed258801	250	0.246	70	0.217	50	0.247
	5	seed265179	450	0.327	60	0.148	30	0.196
	5	seed266817	550	0.451	140	0.412	10	0.112	0.500503	0.76154	0.604025
	5	seed282731	550	0.39	180	0.428	15	0.071
	5	seed286219	650	0.376	70	0.332	30	0.477
	5	seed292312	350	0.045	160	0.281	10	0.367
	5	seed302688	700	0.019	120	0.362	45	0.103
	5	seed304663	400	0.213	150	0.378	45	0.385
	5	seed316607	550	0.243	100	0.403	20	0.235
	5	seed39995	550	0.046	80	0.055	30	0.128
	5	seed456078	200	0.408	190	0.309	50	0.068
	5	seed45769	600	0.172	80	0.408	25	0.082
	5	seed507291	300	0.237	100	0.322	45	0.24
	5	seed514247	200	0.288	130	0.366	10	0.269
	5	seed525684	650	0.48	110	0.369	30	0.383
	5	seed544969	350	0.379	200	0.431	35	0.401
	5	seed609274	350	0.469	120	0.266	50	0.341
	5	seed622299	700	0.352	200	0.414	40	0.053
	5	seed623378	600	0.358	90	0.434	20	0.103
	5	seed640308	750	0.295	110	0.023	30	0.344
	5	seed666079	200	0.008	100	0.077	15	0.201
	5	seed693585	450	0.042	130	0.002	50	0.404
	5	seed759645	700	0.486	110	0.37	15	0.068
	5	seed807321	250	0.391	180	0.001	45	0.299
	5	seed810579	450	0.103	80	0.288	45	0.389
	5	seed831322	400	0.384	80	0.091	15	0.497
	5	seed837284	550	0.352	120	0.327	25	0.421
	5	seed860912	450	0.39	160	0.188	45	0.225
	5	seed914634	500	0.374	170	0.242	35	0.09
	5	seed923422	300	0.25	50	0.366	45	0.194
	5	seed9496	650	0.304	70	0.22	25	0.255
	5	seed992113	600	0.232	160	0.05	40	0.431
	50	seed113704	300	0.288	100	0.186	10	0.475
	50	seed159043	200	0.017	120	0.275	30	0.24
	50	seed181091	350	0.179	120	0.018	40	0.112
	50	seed186720	200	0.435	150	0.223	15	0.014
	50	seed201241	300	0.283	130	0.181	30	0.451
	50	seed218795	300	0.488	200	0.117	50	0.107
	50	seed232222	700	0.202	80	0.151	35	0.327
	50	seed232549	450	0.425	60	0.208	25	0.381
	50	seed258801	500	0.001	60	0.024	40	0.019
	50	seed265179	200	0.381	180	0.031	35	0.482
	50	seed266817	750	0.126	130	0.157	40	0.293
	50	seed282731	250	0.381	170	0.182	45	0.453
	50	seed286219	700	0.048	110	0.384	40	0.337
	50	seed292312	500	0.218	110	0.316	40	0.439
	50	seed302688	700	0.103	50	0.255	45	0.266
	50	seed304663	250	0.259	90	0.267	20	0.209
	50	seed316607	500	0.135	70	0.409	50	0.165
	50	seed39995	700	0.228	100	0.05	15	0.458
	50	seed456078	450	0.286	170	0.481	50	0.412
	50	seed45769	650	0.162	130	0.018	25	0.425
	50	seed507291	650	0.102	170	0.205	40	0.087
	50	seed514247	200	0.439	80	0.155	50	0.395
	50	seed525684	750	0.089	60	0.14	25	0.44
	50	seed544969	200	0.114	100	0.047	35	0.257
	50	seed609274	500	0.371	110	0.342	15	0.031
	50	seed622299	750	0.101	140	0.108	20	0.134
	50	seed623378	700	0.245	170	0.239	20	0.201
	50	seed640308	650	0.159	160	0.131	25	0.425
	50	seed666079	550	0.248	130	0.067	10	0.246
	50	seed693585	350	0.223	160	0.192	45	0.306
	50	seed759645	200	0.374	130	0.237	25	0.136
	50	seed807321	400	0.403	150	0.332	15	0.368
	50	seed831322	650	0.342	160	0.288	20	0.129
	50	seed837284	550	0.335	170	0.066	10	0.435
	50	seed860912	300	0.248	180	0.388	45	0.31
	50	seed914634	300	0.08	180	0.041	20	0.296
	50	seed923422	200	0.374	150	0.354	15	0.348
	50	seed9496	300	0.337	190	0.362	50	0.359
	50	seed992113	250	0.28	50	0.478	45	0.261
	6	seed113704	200	0.015	70	0.177	40	0.228
	6	seed159043	550	0.014	80	0.059	35	0.302
	6	seed181091	650	0.431	150	0.236	25	0.345
	6	seed186720	600	0.14	80	0.163	45	0.366
	6	seed201241	650	0.414	140	0.158	50	0.318
	6	seed218795	700	0.035	180	0.4	30	0.006
	6	seed232222	550	0.439	110	0.067	30	0.239
	6	seed232549	350	0.211	140	0.248	40	0.054
	6	seed258801	250	0.085	180	0.05	10	0.039
	6	seed265179	450	0.122	120	0.219	40	0.404
	6	seed266817	250	0.089	180	0.166	25	0.227
	6	seed282731	200	0.226	150	0.001	35	0.119
	6	seed286219	350	0.38	120	0.32	50	0.06
	6	seed292312	600	0.457	120	0.15	35	0.354
	6	seed302688	750	0.209	90	0.12	10	0.215
	6	seed304663	350	0.416	100	0.494	50	0.25
	6	seed316607	650	0.015	50	0.389	50	0.185
	6	seed39995	600	0.051	50	0.323	20	0.436
	6	seed456078	450	0.238	200	0.392	10	0.431
	6	seed45769	450	0.266	50	0.065	45	0.056
	6	seed507291	200	0.462	180	0.151	30	0.159
	6	seed514247	600	0.437	190	0.112	25	0.223
	6	seed525684	350	0.199	180	0.25	50	0.134
	6	seed544969	500	0.27	80	0.142	35	0.176
	6	seed609274	500	0.413	100	0.192	50	0.191
	6	seed622299	450	0.303	70	0.229	25	0.44
	6	seed623378	750	0.478	70	0.249	25	0.176
	6	seed640308	400	0.166	170	0.082	25	0.352
	6	seed666079	500	0.204	180	0.281	15	0.088
	6	seed693585	250	0.444	180	0.484	20	0.088
	6	seed759645	550	0.259	140	0.18	30	0.288
	6	seed807321	650	0.128	70	0.208	15	0.425
	6	seed810579	250	0.347	180	0.491	40	0.033
	6	seed831322	750	0.36	130	0.222	15	0.332
	6	seed837284	500	0.054	70	0.33	45	0.368
	6	seed860912	650	0.17	150	0.396	30	0.317
	6	seed914634	300	0.247	50	0.224	35	0.005
	6	seed923422	650	0.315	120	0.327	35	0.349
	6	seed9496	750	0.25	60	0.083	25	0.187
	6	seed992113	450	0.377	80	0.072	15	0.343
	7	seed113704	250	0.434	80	0.128	15	0.128
	7	seed159043	600	0.05	200	0.072	10	0.236
	7	seed181091	400	0.042	60	0.015	20	0.269
	7	seed186720	700	0.292	150	0.099	30	0.212
	7	seed201241	200	0.211	150	0.456	40	0.397
	7	seed218795	450	0.086	180	0.22	35	0.097
	7	seed232222	650	0.406	150	0.006	40	0.484
	7	seed232549	650	0.103	160	0.163	10	0.144
	7	seed258801	450	0.31	140	0.419	10	0.426
	7	seed265179	450	0.215	110	0.243	15	0.052
	7	seed266817	200	0.351	170	0.176	40	0.09
	7	seed282731	750	0.167	60	0.009	45	0.042
	7	seed286219	350	0.001	100	0.36	25	0.064
	7	seed292312	200	0.454	70	0.09	45	0.17	0.525478	0.673904	0.590507
	7	seed302688	250	0.388	90	0.12	50	0.255
	7	seed304663	400	0.079	60	0.189	25	0.081	0.526316	0.677308	0.592341
	7	seed316607	500	0.23	60	0.259	35	0.446	0.515756	0.72264	0.601917
	7	seed39995	350	0.18	100	0.325	50	0.315
	7	seed456078	550	0.227	200	0.29	45	0.233
	7	seed45769	750	0.414	100	0.121	45	0.332
	7	seed507291	300	0.451	140	0.315	50	0.419
	7	seed514247	300	0.216	200	0.309	50	0.226
	7	seed525684	350	0.196	100	0.282	30	0.171
	7	seed544969	500	0.122	50	0.395	25	0.406
	7	seed609274	750	0.277	190	0.332	10	0.166
	7	seed622299	400	0.084	160	0.463	40	0.202
	7	seed623378	400	0.069	180	0.413	10	0.492
	7	seed640308	400	0.035	50	0.241	30	0.107
	7	seed666079	550	0.057	100	0.403	20	0.435
	7	seed693585	400	0.273	80	0.093	45	0.364
	7	seed759645	300	0.375	170	0.263	20	0.283
	7	seed807321	600	0.188	200	0.373	40	0.187
	7	seed810579	700	0.47	140	0.033	30	0.359
	7	seed831322	500	0.472	110	0.327	20	0.407
	7	seed837284	450	0.066	150	0.457	25	0.177
	7	seed860912	700	0.054	70	0.274	35	0.189
	7	seed914634	500	0.303	140	0.086	25	0.038	0.531344	0.66779	0.591804
	7	seed923422	500	0.15	80	0.314	25	0.122
	7	seed9496	450	0.266	70	0.402	20	0.178
	7	seed992113	600	0.441	130	0.258	50	0.019
	8	seed113704	200	0.044	80	0.029	50	0.28	0.557325	0.647391	0.598991
	8	seed159043	600	0.306	180	0.082	30	0.172	0.53654	0.663832	0.593437
	8	seed181091	700	0.095	100	0.329	25	0.294
	8	seed186720	650	0.353	50	0.328	15	0.052
	8	seed201241	400	0.242	90	0.369	45	0.297
	8	seed218795	350	0.364	160	0.38	35	0.37
	8	seed232222	700	0.25	180	0.343	45	0.083
	8	seed232549	350	0.368	140	0.116	40	0.392
	8	seed258801	500	0.419	90	0.38	50	0.38
	8	seed265179	550	0.203	70	0.02	10	0.121
	8	seed266817	550	0.066	150	0.411	40	0.068
	8	seed282731	200	0.035	100	0.1	40	0.459
	8	seed286219	400	0.338	180	0.013	40	0.172
	8	seed292312	650	0.07	160	0.145	40	0.044
	8	seed302688	350	0.495	140	0	10	0.294
	8	seed304663	650	0.117	90	0.469	35	0.165
	8	seed316607	350	0.247	200	0.231	25	0.415
	8	seed39995	550	0.242	130	0.328	10	0.164
	8	seed456078	450	0.026	120	0.125	30	0.05	0.536708	0.658171	0.591266
	8	seed45769	250	0.378	150	0.349	50	0.347
	8	seed507291	600	0.197	120	0.3	20	0.434
	8	seed514247	550	0.162	180	0.172	50	0.357
	8	seed525684	200	0.216	90	0.002	30	0.413
	8	seed544969	650	0.472	110	0.385	20	0.271
	8	seed609274	600	0.27	160	0.278	20	0.059
	8	seed622299	400	0.031	120	0.412	35	0.264
	8	seed623378	650	0.467	170	0.497	25	0.431
	8	seed640308	600	0.167	90	0.25	15	0.374
	8	seed666079	750	0.174	60	0.261	30	0.199
	8	seed693585	500	0.345	140	0.223	20	0.036
	8	seed759645	200	0.478	150	0.229	35	0.032
	8	seed807321	250	0.196	80	0.49	10	0.479
	8	seed810579	750	0.415	150	0.006	50	0.183	0.527657	0.678302	0.59357
	8	seed831322	300	0.084	200	0.401	45	0.143
	8	seed837284	400	0.487	100	0.418	10	0.321	0.572746	0.621499	0.596127
	8	seed860912	650	0.093	140	0.48	15	0.479
	8	seed914634	300	0.123	120	0.413	15	0.036
	8	seed923422	550	0.25	200	0.209	10	0.192
	8	seed9496	200	0.452	150	0.063	45	0.236
	8	seed992113	600	0.363	200	0.452	35	0.076
	9	seed113704	550	0.451	120	0.381	30	0.301
	9	seed159043	550	0.319	100	0.372	40	0.447
	9	seed181091	450	0.195	90	0.388	40	0.151
	9	seed186720	600	0.427	120	0.336	25	0.356
	9	seed201241	600	0.204	120	0.305	25	0.027
	9	seed218795	550	0.42	110	0.479	20	0.233
	9	seed232222	550	0.235	80	0.452	35	0.427
	9	seed232549	400	0.323	140	0.444	35	0.086
	9	seed258801	350	0.256	70	0.335	25	0.141
	9	seed265179	400	0.004	90	0.227	50	0.386
	9	seed266817	500	0.026	120	0.206	10	0.23
	9	seed282731	350	0.131	100	0.168	20	0.216
	9	seed286219	300	0.298	160	0.257	35	0.21
	9	seed292312	500	0.242	190	0.262	25	0.123
	9	seed302688	350	0.231	80	0.206	40	0.485
	9	seed304663	400	0.437	150	0.476	20	0.459
	9	seed316607	250	0.267	130	0.3	45	0.061
	9	seed39995	600	0.371	100	0.299	45	0.226
	9	seed456078	750	0.468	150	0.356	45	0.067
	9	seed45769	300	0.063	200	0.076	45	0.38
	9	seed507291	400	0.43	80	0.125	30	0.149
	9	seed514247	400	0.009	170	0.039	20	0.463
	9	seed525684	250	0.295	80	0.378	20	0.149
	9	seed544969	250	0.288	70	0.338	50	0.38
	9	seed609274	400	0.286	120	0.418	45	0.409
	9	seed622299	600	0.478	170	0.193	30	0.307
	9	seed623378	350	0.107	200	0.455	10	0.338
	9	seed640308	600	0.044	160	0.035	40	0.188
	9	seed666079	250	0.46	180	0.093	40	0.386
	9	seed693585	450	0.053	160	0.484	45	0.087
	9	seed759645	450	0.06	180	0.129	30	0.426
	9	seed807321	350	0.439	50	0.351	20	0.083
	9	seed810579	200	0.244	90	0.303	10	0.224
	9	seed831322	700	0.227	120	0.378	20	0.479
	9	seed837284	750	0.458	120	0.385	15	0.209
	9	seed860912	750	0.071	180	0.398	30	0.345
	9	seed914634	200	0.265	170	0.12	30	0.157
	9	seed923422	700	0.084	200	0.339	10	0.382
	9	seed9496	700	0.117	160	0.159	35	0.468
	9	seed992113	650	0.098	110	0.196	30	0.454

## Sheet: Table S2B 
	Table S2B. List of Parameters in Deep Learning
	Listed are neuron accounts and dropout parameters for deep learning models with protein abundance features (highlighted in light blue lines are models with F1-measure > 0.49)
	Models	Seed	Layer I		Layer II		Layer III		Recall	Precision	F1-measure
			Neurons	Dropout	Neurons	Dropout	Neurons	Dropout
	1	seed113704	500	0.099	160	0.262	45	0.151
	1	seed159043	550	0.339	190	0.117	50	0.423
	1	seed181091	200	0.457	100	0.424	50	0.115
	1	seed186720	300	0.127	190	0.372	30	0.493
	1	seed201241	450	0.388	160	0.478	30	0.074
	1	seed218795	600	0.398	190	0.481	50	0.298
	1	seed232222	300	0.114	160	0.003	30	0.009
	1	seed232549	600	0.395	190	0.393	35	0.235
	1	seed258801	550	0.324	50	0.322	40	0.41
	1	seed265179	250	0.369	190	0.151	35	0.221
	1	seed266817	350	0.292	70	0.14	25	0.144
	1	seed282731	200	0.49	190	0.091	40	0.297
	1	seed286219	400	0.315	170	0.187	25	0.309
	1	seed292312	400	0.116	50	0.067	15	0.145
	1	seed302688	750	0.284	70	0.059	35	0.119
	1	seed304663	350	0.372	180	0.049	20	0.471
	1	seed316607	650	0.451	190	0.361	30	0.409
	1	seed39995	750	0.248	180	0.329	30	0.06
	1	seed456078	450	0.458	60	0.408	35	0.22
	1	seed45769	400	0.062	170	0.132	50	0.263
	1	seed507291	650	0.063	110	0.357	35	0.449
	1	seed514247	400	0.022	120	0.287	40	0.366
	1	seed525684	400	0.237	170	0.393	35	0.054
	1	seed544969	650	0.222	100	0.368	25	0.001	0.412039	0.622908	0.495992
	1	seed609274	350	0.255	160	0.109	50	0.282
	1	seed622299	750	0.201	170	0.049	25	0.146
	1	seed623378	300	0.032	180	0.342	15	0.286
	1	seed640308	750	0.24	90	0.002	30	0.18
	1	seed666079	550	0.384	50	0.194	40	0.211
	1	seed693585	450	0.325	180	0.056	15	0.119
	1	seed759645	650	0.079	120	0.441	50	0.426
	1	seed807321	700	0.232	60	0.011	15	0.059
	1	seed810579	350	0.026	160	0.188	15	0.356
	1	seed831322	650	0.006	70	0.059	50	0.122
	1	seed837284	650	0.483	90	0.456	10	0.077
	1	seed860912	350	0.19	190	0.163	10	0.044	0.417575	0.624418	0.500466
	1	seed914634	700	0.36	150	0.072	35	0.003
	1	seed923422	400	0.253	150	0.274	35	0.132
	1	seed9496	450	0.106	60	0.043	10	0.476
	1	seed992113	300	0.258	110	0.45	30	0.259
	10	seed113704	400	0.36	70	0.029	10	0.129
	10	seed159043	600	0.147	130	0.365	20	0.087
	10	seed181091	200	0.403	200	0.09	20	0.232
	10	seed186720	450	0.299	50	0.148	25	0.103
	10	seed201241	550	0.155	140	0.051	35	0.402
	10	seed218795	400	0.482	80	0.053	10	0.246
	10	seed232222	250	0.217	180	0.356	40	0.081
	10	seed232549	500	0.06	130	0.249	45	0.014
	10	seed258801	600	0.433	150	0.349	30	0.061
	10	seed265179	200	0.045	80	0.485	10	0.316
	10	seed266817	700	0.241	190	0.236	30	0.177
	10	seed282731	350	0.291	110	0.156	45	0.399
	10	seed286219	600	0.221	190	0.368	15	0.121
	10	seed292312	400	0.166	110	0.27	50	0.426
	10	seed302688	550	0.464	80	0.031	25	0.218
	10	seed304663	700	0.422	160	0.357	35	0.118
	10	seed316607	650	0.464	100	0.396	20	0.29
	10	seed39995	500	0.17	160	0.175	30	0.26
	10	seed456078	550	0.18	90	0.25	40	0.169
	10	seed45769	500	0.454	50	0.283	25	0.351
	10	seed507291	600	0.207	80	0.49	25	0.432
	10	seed514247	700	0.179	130	0.201	25	0.303
	10	seed525684	450	0.433	80	0.043	35	0.104
	10	seed544969	450	0.408	190	0.453	25	0.357
	10	seed609274	200	0.084	140	0.318	15	0.454
	10	seed622299	400	0.418	90	0.418	35	0.225
	10	seed623378	450	0.318	100	0.037	35	0.426
	10	seed640308	200	0.117	200	0.014	15	0.356
	10	seed666079	600	0.092	180	0.275	40	0.031
	10	seed693585	350	0.29	120	0.214	45	0.476
	10	seed759645	750	0.189	110	0.371	25	0.27
	10	seed807321	400	0.128	200	0.245	50	0.278
	10	seed810579	700	0.059	90	0.474	45	0.019
	10	seed831322	250	0.136	150	0.458	20	0.373
	10	seed837284	300	0.105	60	0.143	30	0.104
	10	seed860912	700	0.135	160	0.162	35	0.474
	10	seed914634	650	0.375	70	0.426	20	0.301
	10	seed923422	250	0.193	200	0.171	15	0.114
	10	seed9496	400	0.208	80	0.364	15	0.465
	10	seed992113	650	0.292	100	0.052	15	0.211
	11	seed113704	600	0.246	140	0.251	25	0.461
	11	seed159043	250	0.351	200	0.227	40	0.287	0.43297	0.581958	0.496528
	11	seed181091	650	0.21	170	0.145	45	0.126
	11	seed186720	300	0.355	140	0.416	45	0.25
	11	seed201241	600	0.421	120	0.314	10	0.021
	11	seed218795	650	0.213	120	0.098	10	0.156	0.400104	0.633525	0.490458
	11	seed232222	300	0.485	200	0.071	35	0.061
	11	seed232549	200	0.449	150	0.166	20	0.392
	11	seed258801	350	0.034	50	0.345	25	0.359
	11	seed265179	300	0.27	190	0.3	40	0.062
	11	seed266817	750	0.301	120	0.046	35	0.203
	11	seed282731	600	0.117	80	0.362	20	0.186
	11	seed286219	500	0.359	160	0.297	20	0.113
	11	seed292312	400	0.054	90	0.371	15	0.165
	11	seed302688	750	0.45	150	0.22	35	0.205
	11	seed304663	750	0.485	110	0.441	35	0.271
	11	seed316607	650	0.117	100	0.315	20	0.11
	11	seed39995	550	0.241	60	0.136	45	0.021	0.408499	0.616977	0.491546
	11	seed456078	300	0.488	70	0.347	30	0.373
	11	seed45769	200	0.412	190	0.344	35	0.142
	11	seed507291	250	0.455	100	0.222	35	0.09
	11	seed514247	300	0.169	110	0.238	35	0.446
	11	seed525684	300	0.104	170	0.243	35	0.017	0.397855	0.647523	0.492875
	11	seed544969	350	0.052	150	0.361	35	0.435
	11	seed609274	600	0.07	50	0.284	10	0.318
	11	seed622299	550	0.371	170	0.435	15	0.482
	11	seed623378	400	0.178	60	0.27	35	0.246
	11	seed640308	200	0.424	90	0.086	20	0.38
	11	seed666079	600	0.326	90	0.138	20	0.472
	11	seed693585	650	0.372	120	0.023	10	0.298
	11	seed759645	300	0.268	50	0.097	30	0.16
	11	seed807321	250	0.27	50	0.342	10	0.066
	11	seed810579	250	0.194	170	0.176	50	0.257
	11	seed831322	200	0.302	90	0.387	20	0.183
	11	seed837284	750	0.372	140	0.151	15	0.351
	11	seed860912	300	0.155	70	0.397	40	0.321
	11	seed914634	700	0.326	140	0.384	25	0.331
	11	seed923422	250	0.127	50	0.15	20	0.078
	11	seed9496	550	0.174	100	0.059	35	0.441
	11	seed992113	550	0.003	130	0.007	20	0.347
	12	seed113704	700	0.38	200	0.23	30	0.332
	12	seed159043	400	0.223	170	0.363	50	0.424
	12	seed181091	300	0.216	150	0.269	15	0.388
	12	seed186720	500	0.473	80	0.363	45	0.422
	12	seed201241	250	0.341	130	0.095	45	0.453
	12	seed218795	250	0.34	120	0.303	35	0.446
	12	seed232222	650	0.276	160	0.431	35	0.428
	12	seed232549	250	0.289	170	0.317	40	0.401
	12	seed258801	500	0.178	160	0.099	45	0.307
	12	seed265179	750	0.332	70	0.195	10	0.253
	12	seed266817	450	0.437	140	0.061	45	0.148
	12	seed282731	650	0.43	160	0.4	20	0.259
	12	seed286219	250	0.469	160	0.003	50	0.059
	12	seed292312	550	0.359	80	0.05	35	0.03
	12	seed302688	250	0.363	130	0.189	25	0.454
	12	seed304663	600	0.215	90	0.379	10	0.234
	12	seed316607	250	0.41	170	0.146	25	0.315
	12	seed39995	700	0.346	180	0.111	20	0.246
	12	seed456078	400	0.364	120	0.314	25	0.03
	12	seed45769	200	0.276	80	0.122	30	0.382
	12	seed507291	350	0.422	60	0.467	10	0.211
	12	seed514247	200	0.23	130	0.171	20	0.434
	12	seed525684	400	0.194	130	0.224	45	0.451
	12	seed544969	650	0.488	190	0.182	15	0.166	0.410829	0.623523	0.495308
	12	seed609274	200	0	110	0.256	15	0.198
	12	seed622299	400	0.132	130	0.468	45	0.233
	12	seed623378	600	0.099	120	0.348	10	0.393
	12	seed640308	350	0.151	130	0.349	25	0.36
	12	seed666079	600	0.305	140	0.47	40	0.396
	12	seed693585	500	0.01	70	0.115	45	0.456
	12	seed759645	450	0.016	180	0.453	40	0.337
	12	seed807321	650	0.263	140	0.009	40	0.159
	12	seed810579	700	0.072	50	0.273	20	0.307
	12	seed831322	500	0.05	190	0.157	35	0.352
	12	seed837284	250	0.258	50	0.213	40	0.239
	12	seed860912	700	0.19	200	0.057	45	0.415
	12	seed914634	450	0.031	70	0.364	50	0.24
	12	seed923422	550	0.337	50	0.342	35	0.037
	12	seed9496	300	0.41	90	0.233	45	0.211
	12	seed992113	650	0.007	150	0.346	30	0.49
	13	seed113704	650	0.218	60	0.238	50	0.352
	13	seed159043	550	0.214	170	0.231	15	0.256
	13	seed181091	250	0.221	80	0.486	40	0.141
	13	seed186720	700	0.494	160	0.339	15	0.264
	13	seed201241	600	0.257	190	0.042	35	0.289
	13	seed218795	500	0.212	50	0.251	15	0.343
	13	seed232222	750	0.484	120	0.155	10	0.395
	13	seed232549	650	0.018	140	0.435	10	0.158
	13	seed258801	550	0.382	110	0.094	40	0.24
	13	seed265179	500	0.205	90	0.176	35	0.074
	13	seed266817	200	0.063	160	0.464	35	0.066
	13	seed282731	550	0.1	70	0.42	25	0.364
	13	seed286219	500	0.139	130	0.422	25	0.349
	13	seed292312	750	0.495	160	0.251	50	0.075
	13	seed302688	550	0.142	200	0.007	50	0.456
	13	seed304663	600	0.492	70	0.11	50	0.282
	13	seed316607	350	0.397	190	0.278	45	0.213
	13	seed39995	500	0.004	60	0.329	35	0.112
	13	seed456078	550	0.449	60	0.214	30	0.491
	13	seed45769	700	0.206	140	0.004	35	0.122
	13	seed507291	650	0.271	120	0.216	35	0.188
	13	seed514247	600	0.011	160	0.316	25	0.39
	13	seed525684	400	0.046	100	0.463	45	0.028
	13	seed544969	250	0.072	70	0.18	10	0.292
	13	seed609274	600	0.156	150	0.364	20	0.44
	13	seed622299	550	0.357	150	0.318	15	0.298
	13	seed623378	450	0.474	60	0.401	45	0.257
	13	seed640308	550	0.044	190	0.231	35	0.497
	13	seed666079	400	0.307	60	0.467	10	0.272
	13	seed693585	750	0.311	160	0.088	50	0.241
	13	seed759645	550	0.041	190	0.265	25	0.118
	13	seed807321	600	0.371	180	0.355	20	0.247
	13	seed810579	350	0.23	160	0.401	10	0.272
	13	seed831322	300	0.155	170	0.114	10	0.353
	13	seed837284	250	0.14	150	0.081	35	0.487
	13	seed860912	650	0.142	50	0.474	25	0.344
	13	seed914634	200	0.04	160	0.189	40	0.159
	13	seed923422	350	0.428	180	0.246	50	0.482
	13	seed9496	200	0.071	120	0.05	35	0.218
	13	seed992113	450	0.334	130	0.176	25	0.037
	14	seed113704	700	0.305	80	0.031	30	0.446
	14	seed159043	550	0.364	60	0.076	50	0.05
	14	seed181091	300	0.038	160	0.07	10	0.354
	14	seed186720	650	0.126	70	0.401	15	0.384
	14	seed201241	250	0.33	110	0.352	10	0.449
	14	seed218795	450	0.014	120	0.07	50	0.049
	14	seed232222	650	0.281	50	0.134	15	0.129
	14	seed232549	750	0.144	170	0.235	40	0.118
	14	seed258801	600	0.42	130	0.111	20	0.245	0.437987	0.567968	0.49458
	14	seed265179	700	0.19	80	0.229	20	0.273
	14	seed266817	350	0.274	80	0.117	35	0.108
	14	seed282731	700	0.257	50	0.143	30	0.034	0.418613	0.599604	0.493022
	14	seed286219	750	0.187	70	0.03	15	0.18
	14	seed292312	450	0.36	170	0.03	45	0.134
	14	seed302688	400	0.003	110	0.237	25	0.437
	14	seed304663	450	0.298	80	0.008	25	0.313
	14	seed316607	450	0.343	190	0.185	50	0.427
	14	seed39995	250	0.244	150	0.293	20	0.063
	14	seed456078	550	0.153	70	0.367	15	0.28
	14	seed45769	300	0.313	180	0.461	20	0.273
	14	seed507291	400	0.073	60	0.257	25	0.265
	14	seed514247	300	0.347	90	0.107	40	0.214
	14	seed525684	750	0.474	90	0.462	30	0.488
	14	seed544969	500	0.408	150	0.235	15	0.07	0.403701	0.626929	0.49114
	14	seed609274	550	0.454	200	0.461	10	0.169
	14	seed622299	600	0.063	80	0.278	35	0.244
	14	seed623378	450	0.484	110	0.406	25	0.167
	14	seed640308	650	0.288	110	0.065	35	0.308	0.410137	0.639084	0.499631
	14	seed666079	750	0.227	70	0.092	25	0.432
	14	seed693585	400	0.448	170	0.023	30	0.442
	14	seed759645	400	0.054	60	0.315	20	0.114
	14	seed807321	450	0.026	150	0.422	10	0.065
	14	seed810579	500	0.085	160	0.213	25	0.114
	14	seed831322	400	0.141	80	0.223	20	0.032
	14	seed837284	750	0.016	70	0.456	45	0.305
	14	seed860912	550	0.202	200	0.432	40	0.44
	14	seed914634	300	0.445	90	0.378	20	0.481
	14	seed923422	200	0.199	140	0.358	30	0.351
	14	seed9496	250	0.091	90	0.042	15	0.094
	14	seed992113	450	0.462	150	0.446	25	0.492
	15	seed113704	250	0.185	140	0.386	15	0.297
	15	seed159043	750	0.379	60	0.495	10	0.161
	15	seed181091	600	0.353	170	0.309	35	0.374
	15	seed186720	350	0.148	50	0.285	15	0.018
	15	seed201241	350	0.065	140	0.034	25	0.446
	15	seed218795	750	0.238	180	0.452	40	0.167
	15	seed232222	400	0.175	130	0.001	10	0.044
	15	seed232549	400	0.454	100	0.485	25	0.368
	15	seed258801	400	0.453	60	0.175	30	0.334
	15	seed265179	700	0.113	50	0.091	10	0.242
	15	seed266817	550	0.326	180	0.327	15	0.421
	15	seed282731	400	0.379	170	0.201	45	0.464
	15	seed286219	500	0.277	140	0.494	20	0.141
	15	seed292312	250	0.318	190	0.166	10	0.366
	15	seed302688	750	0.264	90	0.162	20	0.442
	15	seed304663	200	0.141	90	0.037	10	0.119
	15	seed316607	450	0.154	70	0.149	10	0.399
	15	seed39995	300	0.373	70	0.243	15	0.383
	15	seed456078	600	0.32	70	0.211	45	0.168
	15	seed45769	700	0.292	180	0.024	35	0.026
	15	seed507291	300	0.445	180	0.18	20	0.057
	15	seed514247	550	0.32	120	0.45	15	0.304	0.411002	0.627244	0.496604
	15	seed525684	700	0.096	200	0.463	50	0.045
	15	seed544969	200	0.077	130	0.297	25	0.026
	15	seed609274	450	0.05	190	0.413	45	0.25
	15	seed622299	650	0.238	170	0.164	25	0.106	0.391021	0.658396	0.490647
	15	seed623378	700	0.209	110	0.222	20	0.331
	15	seed640308	450	0.019	130	0.275	50	0.039
	15	seed666079	650	0.475	70	0.179	10	0.002
	15	seed693585	400	0.314	50	0.063	40	0.002
	15	seed759645	200	0.366	90	0.456	40	0.221
	15	seed807321	600	0.224	120	0.145	10	0.295
	15	seed810579	450	0.233	130	0.218	25	0.083
	15	seed831322	700	0.065	60	0.105	40	0.362
	15	seed837284	500	0.052	50	0.425	10	0.274
	15	seed860912	650	0.188	70	0.282	15	0.063
	15	seed914634	450	0.416	80	0.259	45	0.075
	15	seed923422	350	0.134	80	0.387	45	0.495
	15	seed9496	700	0.091	150	0.06	40	0.151	0.425705	0.587211	0.493582
	15	seed992113	300	0.08	100	0.374	15	0.042
	16	seed113704	700	0.325	80	0.101	35	0.157
	16	seed159043	450	0.313	140	0.456	30	0.291
	16	seed181091	200	0.236	60	0.25	35	0.319
	16	seed186720	450	0.49	60	0.285	10	0.078
	16	seed201241	700	0.373	90	0.19	20	0.239
	16	seed218795	500	0.376	80	0.155	25	0.154
	16	seed232222	200	0.005	180	0.166	45	0.019
	16	seed232549	550	0.476	170	0.46	35	0.398
	16	seed258801	700	0.343	170	0.289	35	0.354
	16	seed265179	550	0.318	70	0.431	45	0.131
	16	seed266817	550	0.34	190	0.486	20	0.202
	16	seed282731	200	0.177	180	0.035	25	0.162
	16	seed286219	600	0.163	100	0.138	10	0.195
	16	seed292312	200	0.303	120	0.345	40	0.368
	16	seed302688	600	0.362	190	0.37	30	0.224
	16	seed304663	500	0.41	60	0.349	10	0.215
	16	seed316607	750	0.309	160	0.053	45	0.335
	16	seed39995	350	0.262	170	0.09	15	0.196
	16	seed456078	400	0.308	70	0.305	20	0.175
	16	seed45769	550	0.465	150	0.03	10	0.442
	16	seed507291	450	0.466	160	0.072	30	0.477
	16	seed514247	600	0.417	170	0.201	20	0.369
	16	seed525684	450	0.276	120	0.012	30	0.102	0.416191	0.598359	0.49092
	16	seed544969	400	0.034	200	0.243	10	0.297
	16	seed609274	250	0.034	160	0.358	15	0.411
	16	seed622299	400	0.476	90	0.497	25	0.129
	16	seed623378	200	0.134	160	0.13	15	0.001
	16	seed640308	200	0.471	140	0.23	20	0.089
	16	seed666079	700	0.102	100	0.475	10	0.233
	16	seed693585	550	0.477	110	0.18	25	0.385
	16	seed759645	350	0.374	50	0.339	45	0.32
	16	seed807321	550	0.332	140	0.155	25	0.451
	16	seed810579	650	0.478	180	0.019	35	0.284
	16	seed831322	650	0.017	50	0.108	20	0.273
	16	seed837284	750	0.187	180	0.473	15	0.267
	16	seed860912	450	0.352	150	0.187	10	0.247
	16	seed914634	550	0.254	130	0.184	10	0.342
	16	seed923422	250	0.402	160	0.405	45	0.444
	16	seed9496	600	0.465	130	0.303	40	0.301
	16	seed992113	600	0.225	190	0.118	10	0.111
	17	seed113704	650	0.037	180	0.426	15	0.322
	17	seed159043	650	0.225	160	0.16	30	0.385
	17	seed181091	700	0.469	130	0.063	40	0.069
	17	seed186720	600	0.15	150	0.168	25	0.392
	17	seed201241	200	0.094	60	0.179	50	0.497
	17	seed218795	200	0.438	120	0.432	45	0.334
	17	seed232222	250	0.41	60	0.149	40	0.448
	17	seed232549	650	0.395	80	0.311	35	0.074
	17	seed258801	600	0.07	120	0.043	20	0.356
	17	seed265179	500	0.486	170	0.454	25	0.459
	17	seed266817	450	0.445	110	0.267	40	0.019
	17	seed282731	700	0.429	50	0.142	10	0.396
	17	seed286219	550	0.236	120	0.076	20	0.153	0.398201	0.654721	0.495214
	17	seed292312	700	0.337	150	0.479	45	0.343
	17	seed302688	700	0.115	70	0.348	30	0.41
	17	seed304663	300	0.001	140	0.475	20	0.006
	17	seed316607	550	0.347	110	0.194	50	0.421
	17	seed39995	650	0.409	190	0.047	45	0.492
	17	seed456078	650	0.492	190	0.483	25	0.272
	17	seed45769	750	0.102	90	0.294	35	0.055
	17	seed507291	600	0.419	130	0.094	10	0.493
	17	seed514247	200	0.418	130	0.25	20	0.181
	17	seed525684	600	0.414	200	0.299	45	0.006
	17	seed544969	300	0.124	180	0.072	50	0.464
	17	seed609274	650	0.442	140	0.353	25	0.209
	17	seed622299	550	0.172	100	0.268	15	0.325
	17	seed623378	550	0.292	110	0.492	40	0.026
	17	seed640308	250	0.284	200	0.328	10	0.059
	17	seed666079	300	0.44	160	0.103	30	0.084	0.42484	0.598732	0.497015
	17	seed693585	450	0.309	160	0.249	35	0.396
	17	seed759645	700	0.398	200	0.049	15	0.382
	17	seed807321	250	0.088	120	0.093	25	0.189
	17	seed810579	700	0.215	110	0.102	35	0.021
	17	seed831322	300	0.291	70	0.16	25	0.307
	17	seed837284	500	0.484	150	0.048	40	0.345
	17	seed860912	250	0.219	70	0.166	25	0.252
	17	seed914634	200	0.296	100	0.13	20	0.073
	17	seed923422	750	0.244	100	0.201	20	0.436
	17	seed9496	500	0.362	110	0.131	40	0.217
	17	seed992113	600	0.048	180	0.061	45	0.317
	18	seed113704	650	0.034	170	0.036	10	0.349
	18	seed159043	250	0.401	190	0.107	45	0.159
	18	seed181091	500	0.047	60	0.265	25	0.009
	18	seed186720	350	0.438	140	0.214	25	0.037
	18	seed201241	250	0.064	170	0.071	50	0.279
	18	seed218795	400	0.436	150	0.471	20	0.45
	18	seed232222	450	0.335	50	0.451	30	0.363
	18	seed232549	650	0.221	90	0.356	30	0.005
	18	seed258801	500	0.21	60	0.349	35	0.421
	18	seed265179	650	0.266	200	0.208	40	0.316
	18	seed266817	200	0.068	90	0.493	10	0.306
	18	seed282731	550	0.29	180	0.284	35	0.164
	18	seed286219	450	0.488	170	0.318	10	0.128
	18	seed292312	700	0.114	190	0.134	50	0.327
	18	seed302688	250	0.037	50	0.097	45	0.331
	18	seed304663	250	0.337	200	0.126	45	0.404
	18	seed316607	500	0.216	140	0.124	40	0.341
	18	seed39995	350	0.37	90	0.401	40	0.172
	18	seed456078	300	0.447	60	0.038	20	0.326	0.378135	0.698403	0.49063
	18	seed45769	250	0.173	120	0.165	30	0.037
	18	seed507291	250	0.484	100	0.214	35	0.498
	18	seed514247	200	0.449	200	0.232	25	0.379
	18	seed525684	550	0.156	110	0.294	30	0.188
	18	seed544969	650	0.271	120	0.13	40	0.489
	18	seed609274	600	0.321	120	0.243	25	0.325
	18	seed622299	750	0.472	170	0.304	30	0.371
	18	seed623378	600	0.455	170	0.391	20	0.092
	18	seed640308	600	0.112	140	0.423	45	0.253
	18	seed666079	250	0.031	130	0.422	10	0.29
	18	seed693585	400	0.321	50	0.274	40	0.322
	18	seed759645	300	0.272	100	0.332	50	0.156	0.410829	0.612745	0.491871
	18	seed807321	450	0.105	170	0.378	25	0.252
	18	seed810579	450	0.403	80	0.212	45	0.429
	18	seed831322	600	0.418	90	0.128	15	0.449
	18	seed837284	400	0.211	130	0.023	35	0.438
	18	seed860912	400	0.45	60	0.058	20	0.345
	18	seed914634	550	0.112	190	0.341	10	0.349
	18	seed923422	250	0.397	170	0.142	40	0.137
	18	seed9496	500	0.084	170	0.264	25	0.493
	18	seed992113	550	0.177	200	0.285	40	0.184
	19	seed113704	200	0.319	170	0.307	45	0.34
	19	seed159043	450	0.153	100	0.268	30	0.449
	19	seed181091	550	0.167	200	0.352	15	0.223
	19	seed186720	550	0.045	130	0.197	35	0.074
	19	seed201241	400	0.167	60	0.286	40	0.348
	19	seed218795	500	0.351	160	0.17	10	0.401
	19	seed232222	500	0.193	100	0.222	30	0.2
	19	seed232549	450	0.389	60	0.231	10	0.262
	19	seed258801	750	0.103	130	0.374	25	0.176
	19	seed265179	200	0.244	130	0.392	45	0.244
	19	seed266817	600	0.216	80	0.408	50	0.419
	19	seed282731	600	0.173	200	0.06	15	0.158
	19	seed286219	200	0.238	110	0.492	25	0.206
	19	seed292312	750	0.351	70	0.094	50	0.444
	19	seed302688	650	0.167	90	0.193	20	0.007
	19	seed304663	700	0.051	80	0.058	40	0.08
	19	seed316607	750	0.182	110	0.453	45	0.062
	19	seed39995	750	0.04	150	0.122	15	0.173
	19	seed456078	750	0.472	200	0.426	45	0.483
	19	seed45769	250	0.172	170	0.41	50	0.487
	19	seed507291	250	0.31	150	0.258	50	0.144
	19	seed514247	350	0.006	50	0.354	15	0.309
	19	seed525684	200	0.271	160	0.173	25	0.244
	19	seed544969	550	0.143	70	0.06	50	0.291
	19	seed609274	650	0.338	190	0.387	10	0.492
	19	seed622299	450	0	110	0.439	50	0.404
	19	seed623378	250	0.338	90	0.179	45	0.109	0.395952	0.673037	0.498584
	19	seed640308	600	0.165	190	0.236	35	0.199
	19	seed666079	300	0.41	130	0.383	50	0.096
	19	seed693585	350	0.448	60	0.177	45	0.164
	19	seed759645	200	0.176	110	0.32	15	0.367
	19	seed807321	350	0.391	110	0.184	40	0.38	0.437641	0.579743	0.498768
	19	seed810579	400	0.01	110	0.414	15	0.204
	19	seed831322	700	0.14	120	0.258	10	0.393
	19	seed837284	200	0.369	140	0.057	10	0.308
	19	seed860912	550	0.192	160	0.123	10	0.2
	19	seed914634	250	0.203	90	0.061	35	0.355
	19	seed923422	500	0.125	100	0.362	45	0.064
	19	seed9496	400	0.366	140	0.228	35	0.065
	19	seed992113	500	0.444	60	0.481	30	0.16
	2	seed113704	350	0.202	60	0.389	50	0.268
	2	seed159043	450	0.255	110	0.263	50	0.327
	2	seed181091	300	0.22	100	0.246	20	0.082
	2	seed186720	500	0.46	80	0.496	50	0.019
	2	seed201241	200	0.036	130	0.192	25	0.137
	2	seed218795	250	0.457	60	0.132	35	0.144
	2	seed232222	600	0.21	200	0.483	40	0.021
	2	seed232549	450	0.185	70	0.381	40	0.34
	2	seed258801	450	0.174	90	0.252	35	0.309
	2	seed265179	600	0.267	140	0.445	40	0.353	0.438851	0.55575	0.490431
	2	seed266817	250	0.354	100	0.389	10	0.274
	2	seed282731	600	0.177	110	0.348	20	0.004
	2	seed286219	350	0.133	120	0.467	30	0.431
	2	seed292312	400	0.182	50	0.139	30	0.245
	2	seed302688	250	0.402	100	0.081	40	0.442	0.413423	0.623045	0.497036
	2	seed304663	200	0.159	200	0.204	35	0.099
	2	seed316607	550	0.017	80	0.129	15	0.241
	2	seed39995	300	0.468	200	0.489	20	0.302
	2	seed456078	750	0.31	110	0.477	30	0.223
	2	seed45769	550	0.468	190	0.142	50	0.38
	2	seed507291	250	0.218	120	0.459	35	0.213
	2	seed514247	300	0.107	80	0.484	45	0.177
	2	seed525684	250	0.148	90	0.447	45	0.105
	2	seed544969	750	0.088	70	0.328	35	0.446
	2	seed609274	500	0.244	180	0.267	10	0.139
	2	seed622299	400	0.104	190	0.443	45	0.096
	2	seed623378	450	0.194	150	0.077	35	0.237
	2	seed640308	300	0.114	130	0.404	45	0.072
	2	seed666079	350	0.044	120	0.079	30	0.118
	2	seed693585	300	0.397	100	0.009	20	0.291
	2	seed759645	550	0.117	70	0.156	45	0.436
	2	seed807321	250	0.255	200	0.273	50	0.491
	2	seed810579	650	0.267	190	0.172	25	0.153
	2	seed831322	450	0.437	100	0.457	10	0.091
	2	seed837284	450	0.055	60	0.179	45	0.203
	2	seed860912	500	0.41	180	0.061	25	0.143	0.383139	0.691832	0.493163
	2	seed914634	250	0.415	70	0.051	45	0.268
	2	seed923422	650	0.082	120	0.133	35	0.299
	2	seed9496	750	0.203	100	0.412	35	0.003
	2	seed992113	750	0.015	60	0.463	20	0.035
	20	seed113704	700	0.491	110	0.37	25	0.369
	20	seed159043	450	0.169	160	0.132	45	0.385
	20	seed181091	650	0.418	50	0.039	10	0.279
	20	seed186720	650	0.134	180	0.075	20	0.166
	20	seed201241	250	0.376	100	0.109	10	0.358
	20	seed218795	300	0.013	170	0.436	25	0.109
	20	seed232222	650	0.405	80	0.089	45	0.484
	20	seed232549	650	0.222	170	0.233	50	0.156
	20	seed258801	600	0.06	170	0.326	40	0.485
	20	seed265179	550	0.088	150	0.23	15	0.295
	20	seed266817	500	0.336	200	0.078	25	0.446
	20	seed282731	600	0.469	80	0.465	20	0.145
	20	seed286219	600	0.177	110	0.384	50	0.068
	20	seed292312	550	0.263	160	0.164	45	0.109
	20	seed302688	350	0.391	50	0.046	20	0.172
	20	seed304663	350	0.096	190	0.023	20	0.256
	20	seed316607	500	0.251	100	0.268	45	0.459
	20	seed39995	650	0.345	190	0.202	40	0.413
	20	seed456078	550	0.061	120	0.095	30	0.363
	20	seed45769	450	0.363	170	0.459	25	0.076
	20	seed507291	650	0.203	160	0.132	30	0.398
	20	seed514247	250	0.294	80	0.325	50	0.181
	20	seed525684	600	0.17	60	0.208	25	0.067
	20	seed544969	400	0.079	150	0.349	25	0.019
	20	seed609274	750	0.318	100	0.08	20	0.384
	20	seed622299	700	0.199	60	0.098	30	0.288
	20	seed623378	700	0.044	60	0.128	25	0.118
	20	seed640308	300	0.486	140	0.103	15	0.129
	20	seed666079	600	0.407	180	0.226	25	0.256
	20	seed693585	550	0.307	80	0.432	40	0.429
	20	seed759645	500	0.129	110	0.079	40	0.451
	20	seed807321	650	0.254	80	0.196	20	0.238
	20	seed810579	750	0.247	90	0.358	50	0.151
	20	seed831322	600	0.401	180	0.015	20	0.189
	20	seed837284	300	0.23	130	0.021	40	0.323
	20	seed860912	400	0.062	110	0.263	35	0.353
	20	seed914634	350	0.077	160	0.264	20	0.086
	20	seed923422	500	0.24	100	0.377	10	0.113
	20	seed9496	200	0.495	90	0.08	30	0.433	0.411926	0.612328	0.492522
	20	seed992113	500	0.385	70	0.241	25	0.382
	21	seed113704	300	0.023	80	0.38	30	0.374
	21	seed159043	500	0.097	160	0.118	10	0.457
	21	seed181091	350	0.25	120	0.182	40	0.477
	21	seed186720	400	0.252	200	0.392	30	0.042
	21	seed201241	750	0.346	170	0.407	35	0.284
	21	seed218795	650	0.434	100	0.388	20	0.219
	21	seed232222	500	0.353	140	0.187	25	0.442
	21	seed232549	450	0.461	190	0.118	40	0.196
	21	seed258801	350	0.422	200	0.29	40	0.445
	21	seed265179	200	0.293	140	0.084	15	0.48
	21	seed266817	700	0.215	140	0.393	10	0.428
	21	seed282731	250	0.2	90	0.01	45	0.005	0.376971	0.71568	0.493827
	21	seed286219	300	0.342	120	0.416	30	0.088
	21	seed292312	350	0.199	200	0.015	40	0.322
	21	seed302688	450	0.453	110	0.173	10	0.463
	21	seed304663	400	0.138	100	0.04	50	0.107
	21	seed316607	350	0.439	190	0.371	20	0.112	0.421207	0.615521	0.500154
	21	seed39995	200	0.353	140	0.176	35	0.016
	21	seed456078	250	0.258	120	0.316	10	0.337
	21	seed45769	750	0.092	140	0.391	25	0.299
	21	seed507291	550	0.268	150	0.099	35	0.082
	21	seed514247	600	0.165	100	0.142	20	0.483
	21	seed525684	700	0.409	170	0.162	50	0.277
	21	seed544969	550	0.487	70	0.163	35	0.064
	21	seed609274	700	0.48	180	0.454	15	0.36
	21	seed622299	300	0.265	200	0.405	35	0.285
	21	seed623378	600	0.045	90	0.09	45	0.262
	21	seed640308	400	0.143	120	0.194	20	0.472
	21	seed666079	550	0.171	120	0.427	50	0.286
	21	seed693585	700	0.272	140	0.351	45	0.16
	21	seed759645	300	0.104	70	0.072	50	0.238
	21	seed807321	300	0.31	70	0.099	25	0.058
	21	seed810579	250	0.162	110	0.112	40	0.059
	21	seed831322	350	0.238	100	0.189	50	0.19
	21	seed837284	500	0.192	200	0.424	30	0.244
	21	seed860912	550	0.297	140	0.194	10	0.487	0.437814	0.602189	0.507011
	21	seed914634	300	0.293	200	0.276	35	0.172
	21	seed923422	700	0.45	200	0.244	40	0.017	0.384709	0.679084	0.491166
	21	seed9496	400	0.227	80	0.432	50	0.359
	21	seed992113	300	0.358	190	0.064	20	0.486
	22	seed113704	450	0.055	70	0.009	35	0.121
	22	seed159043	400	0.239	130	0.305	45	0.164
	22	seed181091	550	0.093	60	0.186	25	0.289
	22	seed186720	650	0.101	180	0.344	30	0.143
	22	seed201241	250	0.402	70	0.468	40	0.187
	22	seed218795	700	0.491	140	0.304	25	0.218
	22	seed232222	300	0.367	200	0.392	35	0.341
	22	seed232549	400	0.178	190	0.369	15	0.257
	22	seed258801	250	0.286	160	0.105	15	0.209	0.397533	0.638767	0.490072
	22	seed265179	700	0.087	140	0.388	10	0.085
	22	seed266817	550	0.395	200	0.318	25	0.304
	22	seed282731	550	0.058	130	0.192	25	0.306
	22	seed286219	550	0.179	50	0.007	25	0.436
	22	seed292312	200	0.495	190	0.407	10	0.089
	22	seed302688	500	0.359	50	0.437	35	0.16
	22	seed304663	700	0.005	180	0.424	45	0.107
	22	seed316607	450	0.437	190	0.496	50	0.372
	22	seed39995	200	0.487	80	0.087	50	0.211
	22	seed456078	400	0.172	50	0.498	40	0.493
	22	seed45769	550	0.371	160	0.004	45	0.495	0.409618	0.630626	0.496644
	22	seed507291	250	0.131	200	0.31	50	0.154
	22	seed514247	500	0.386	150	0.34	40	0.354
	22	seed525684	250	0.469	100	0.069	20	0.08
	22	seed544969	200	0.133	90	0.199	10	0.116
	22	seed609274	300	0.103	140	0.237	10	0.466
	22	seed622299	250	0.036	80	0.331	15	0.379
	22	seed623378	650	0.001	150	0.134	50	0.406
	22	seed640308	500	0.203	160	0.295	50	0.103
	22	seed666079	200	0.247	110	0.098	20	0.354
	22	seed693585	450	0.1	160	0.272	10	0.249
	22	seed759645	500	0.492	70	0.082	15	0.095
	22	seed807321	450	0.021	50	0.428	45	0.334
	22	seed810579	200	0.047	90	0.254	20	0.03
	22	seed831322	350	0.299	50	0.055	50	0.184
	22	seed837284	600	0.24	170	0.281	45	0.42
	22	seed860912	250	0.167	160	0.177	40	0.322
	22	seed914634	550	0.284	100	0.486	30	0.136
	22	seed923422	700	0.436	110	0.005	45	0.127
	22	seed9496	200	0.024	170	0.204	15	0.119
	22	seed992113	450	0.101	50	0.196	20	0.384
	23	seed113704	200	0.17	110	0.099	30	0.322	0.384853	0.679782	0.491466
	23	seed159043	400	0.222	60	0.339	25	0.446
	23	seed181091	700	0.338	140	0.035	10	0.47
	23	seed186720	350	0.472	120	0.27	35	0.359
	23	seed201241	600	0.145	120	0.459	35	0.429
	23	seed218795	300	0.327	140	0.319	25	0.001
	23	seed232222	650	0.067	130	0.329	45	0.35
	23	seed232549	750	0.305	60	0.172	30	0.499
	23	seed258801	650	0.211	50	0.304	40	0.11
	23	seed265179	700	0.402	120	0.21	50	0.076
	23	seed266817	200	0.187	100	0.293	15	0.042
	23	seed282731	400	0.446	100	0.412	10	0.012
	23	seed286219	650	0.261	170	0.037	25	0.155
	23	seed292312	700	0.03	120	0.479	35	0.201
	23	seed302688	250	0.006	120	0.307	15	0.497
	23	seed304663	550	0.457	50	0.424	20	0.076
	23	seed316607	750	0.04	150	0.028	45	0.477
	23	seed39995	550	0.404	130	0.165	50	0.234	0.403358	0.633136	0.492778
	23	seed456078	700	0.306	170	0.4	50	0.377
	23	seed45769	200	0.384	110	0.198	30	0.226	0.436603	0.567318	0.493451
	23	seed507291	750	0.443	190	0.353	40	0.131
	23	seed514247	250	0.33	60	0.216	30	0.248
	23	seed525684	700	0.074	200	0.015	25	0.195
	23	seed544969	550	0.083	60	0.031	50	0.129
	23	seed609274	750	0.262	190	0.43	15	0.461
	23	seed622299	300	0.228	80	0.457	40	0.098
	23	seed623378	250	0.426	160	0.419	30	0.08
	23	seed640308	250	0.096	170	0.269	25	0.401
	23	seed666079	200	0.186	140	0.415	40	0.119
	23	seed693585	200	0.183	150	0.053	20	0.455
	23	seed759645	200	0.458	100	0.357	45	0.352
	23	seed807321	700	0.236	190	0.298	35	0.289
	23	seed810579	200	0.356	160	0.017	10	0.371
	23	seed831322	700	0.228	130	0.094	40	0.208
	23	seed837284	650	0.422	60	0.143	15	0.367
	23	seed860912	550	0.446	110	0.294	25	0.448
	23	seed914634	350	0.081	90	0.185	45	0.178
	23	seed923422	750	0.107	110	0.405	20	0.458
	23	seed9496	650	0.27	160	0.264	50	0.486
	23	seed992113	750	0.279	180	0.216	10	0.174
	24	seed113704	300	0.456	200	0.087	10	0.134
	24	seed159043	350	0.177	150	0.308	50	0.439
	24	seed181091	600	0.257	110	0.149	35	0.015
	24	seed186720	200	0.345	110	0.166	45	0.184
	24	seed201241	750	0.257	70	0.441	25	0.47
	24	seed218795	250	0.198	50	0.435	45	0.473
	24	seed232222	450	0.473	90	0.224	30	0.345
	24	seed232549	200	0.453	60	0.478	45	0.324
	24	seed258801	550	0.008	80	0.441	30	0.13
	24	seed265179	600	0.218	150	0.197	30	0.287
	24	seed266817	250	0.086	110	0.399	20	0.092
	24	seed282731	500	0.301	80	0.105	45	0.463
	24	seed286219	600	0.181	140	0.313	30	0.092
	24	seed292312	250	0.246	70	0.355	20	0.378
	24	seed302688	550	0.331	140	0.357	25	0.151	0.414634	0.5997	0.490284
	24	seed304663	700	0.056	180	0.189	40	0.143
	24	seed316607	250	0.011	200	0.386	30	0.371
	24	seed39995	550	0.088	160	0.24	20	0.285
	24	seed456078	750	0.131	190	0.374	15	0.013
	24	seed45769	450	0.003	80	0.284	25	0.466
	24	seed507291	450	0.157	120	0.16	20	0.421
	24	seed514247	500	0.418	180	0.261	25	0.037
	24	seed525684	700	0.285	170	0.214	20	0.432
	24	seed544969	450	0.053	180	0.472	35	0.015
	24	seed609274	200	0.135	140	0.266	35	0.107
	24	seed622299	350	0.167	90	0.453	30	0.067
	24	seed623378	500	0.028	90	0.116	35	0.349
	24	seed640308	250	0.332	100	0.328	25	0.463
	24	seed666079	250	0.132	80	0.494	10	0.459
	24	seed693585	250	0.122	60	0.096	15	0.429
	24	seed759645	650	0.23	80	0.445	35	0.406
	24	seed807321	350	0.38	120	0.209	25	0.304
	24	seed810579	750	0.461	160	0.078	50	0.417
	24	seed831322	350	0.469	160	0.423	35	0.188
	24	seed837284	200	0.464	90	0.27	45	0.14
	24	seed860912	500	0.247	70	0.417	15	0.286
	24	seed914634	350	0.098	110	0.384	20	0.204
	24	seed923422	350	0.086	80	0.382	15	0.335
	24	seed9496	500	0.176	120	0.26	15	0.451
	24	seed992113	350	0.398	130	0.142	30	0.315
	25	seed113704	750	0.467	100	0.343	15	0.215
	25	seed159043	500	0.459	170	0.265	10	0.41
	25	seed181091	700	0.05	150	0.145	25	0.125
	25	seed186720	250	0.479	120	0.321	35	0.106
	25	seed201241	250	0.375	70	0.429	35	0.239
	25	seed218795	350	0.093	60	0.157	15	0.437
	25	seed232222	500	0.059	60	0.189	15	0.082
	25	seed232549	500	0.459	120	0.088	35	0.404
	25	seed258801	300	0.083	100	0.328	20	0.422
	25	seed265179	300	0.195	100	0.444	30	0.411
	25	seed266817	400	0.414	160	0.217	25	0.288
	25	seed282731	650	0.449	150	0.453	50	0.335
	25	seed286219	550	0.202	190	0.168	50	0.487
	25	seed292312	250	0.172	60	0.207	25	0.396
	25	seed302688	400	0.479	120	0.358	35	0.432
	25	seed304663	450	0.215	180	0.096	25	0.142
	25	seed316607	200	0.151	80	0.096	25	0.446
	25	seed39995	750	0.014	110	0.265	30	0.017
	25	seed456078	200	0.097	200	0.408	15	0.126
	25	seed45769	450	0.175	90	0.292	10	0.404
	25	seed507291	700	0.387	110	0.316	10	0.119
	25	seed514247	350	0.419	150	0.101	30	0.24
	25	seed525684	700	0.412	180	0.026	25	0.221
	25	seed544969	250	0.216	170	0.145	15	0.168
	25	seed609274	700	0.449	170	0.274	35	0.492
	25	seed622299	200	0.317	110	0.083	25	0.471
	25	seed623378	500	0.04	110	0.242	15	0.204
	25	seed640308	550	0.216	180	0.392	45	0.361
	25	seed666079	400	0.442	170	0.087	25	0.384
	25	seed693585	650	0.008	200	0.108	20	0.37
	25	seed759645	350	0.011	190	0.434	10	0.136
	25	seed807321	550	0.084	90	0.393	20	0.446
	25	seed810579	700	0.255	200	0.304	45	0.149
	25	seed831322	250	0.316	90	0.241	20	0.192
	25	seed837284	350	0.356	180	0.119	45	0.258
	25	seed860912	500	0.421	140	0.091	40	0.252
	25	seed914634	450	0.335	160	0.465	10	0.32
	25	seed923422	500	0.038	80	0.424	40	0.021
	25	seed9496	750	0.316	130	0.468	50	0.291
	25	seed992113	200	0.399	180	0.024	25	0.03
	26	seed113704	750	0.273	160	0.178	35	0.014
	26	seed159043	300	0.065	180	0.327	40	0.364
	26	seed181091	350	0.189	60	0.149	15	0.046
	26	seed186720	400	0.124	140	0.371	45	0.321
	26	seed201241	650	0.31	170	0.168	45	0.325
	26	seed218795	400	0.278	90	0.07	50	0.229
	26	seed232222	300	0.182	170	0.401	35	0.286
	26	seed232549	400	0.181	170	0.263	45	0.045
	26	seed258801	550	0.369	110	0.324	50	0.349
	26	seed265179	650	0.412	100	0.366	30	0.148
	26	seed266817	250	0.282	180	0.012	35	0.225	0.384882	0.676086	0.49052
	26	seed282731	300	0.109	180	0.054	20	0.02
	26	seed286219	650	0.381	170	0.262	30	0.337
	26	seed292312	450	0.025	130	0.134	45	0.49
	26	seed302688	300	0.496	60	0.03	45	0.348
	26	seed304663	450	0.193	170	0.456	40	0.195
	26	seed316607	250	0.134	110	0.329	45	0.46
	26	seed39995	350	0.335	80	0.474	10	0.414
	26	seed456078	350	0.441	170	0.433	15	0.289
	26	seed45769	400	0.107	90	0.336	20	0.171
	26	seed507291	700	0.259	150	0.5	45	0.225
	26	seed514247	750	0.081	200	0.326	20	0.155
	26	seed525684	750	0.318	130	0.329	30	0.233
	26	seed544969	400	0.445	150	0.387	20	0.345
	26	seed609274	600	0.234	90	0.055	25	0.059
	26	seed622299	450	0.073	180	0.424	20	0.243
	26	seed623378	200	0.326	80	0.309	40	0.258
	26	seed640308	600	0.284	60	0.108	35	0.111
	26	seed666079	650	0.246	100	0.152	35	0.008
	26	seed693585	750	0.496	170	0.405	10	0.011
	26	seed759645	600	0.39	160	0.165	45	0.049	0.394106	0.650452	0.490824
	26	seed807321	600	0.335	180	0.13	15	0.111
	26	seed810579	650	0.169	180	0.317	15	0.463
	26	seed831322	600	0.472	50	0.321	45	0.322
	26	seed837284	550	0.369	140	0.261	10	0.334
	26	seed860912	750	0.026	130	0.307	10	0.053
	26	seed914634	600	0.179	130	0.076	35	0.106
	26	seed923422	400	0.093	50	0.137	25	0.304
	26	seed9496	600	0.081	130	0.08	15	0.022
	26	seed992113	250	0.27	110	0.426	15	0.02
	27	seed113704	550	0.232	140	0.437	35	0.318
	27	seed159043	700	0.025	120	0.159	25	0.41
	27	seed181091	500	0.169	60	0.266	30	0.311
	27	seed186720	550	0.475	160	0.358	35	0.136
	27	seed201241	550	0.336	130	0.206	15	0.382
	27	seed218795	500	0.336	130	0.064	15	0.341
	27	seed232222	550	0.003	60	0.238	30	0.304
	27	seed232549	400	0.456	60	0.197	10	0.415
	27	seed258801	700	0.205	50	0.143	35	0.059
	27	seed265179	400	0.398	200	0.481	10	0.43
	27	seed266817	500	0.412	190	0.168	15	0.156
	27	seed282731	750	0.406	150	0.421	15	0.384
	27	seed286219	600	0.275	190	0.485	25	0.003
	27	seed292312	750	0.031	50	0.304	20	0.387
	27	seed302688	650	0.187	110	0.123	20	0.472
	27	seed304663	600	0.451	180	0.466	10	0.466
	27	seed316607	600	0.081	200	0.321	40	0.342
	27	seed39995	750	0.211	200	0.121	35	0.422
	27	seed456078	700	0.332	80	0.294	45	0.164
	27	seed45769	400	0.104	90	0.246	40	0.113
	27	seed507291	400	0.328	80	0.486	15	0.192
	27	seed514247	450	0.395	170	0.231	10	0.381
	27	seed525684	750	0.451	180	0.402	15	0.474
	27	seed544969	300	0.115	140	0.192	40	0.126
	27	seed609274	700	0.1	190	0.166	10	0.365
	27	seed622299	700	0.148	170	0.339	40	0.002
	27	seed623378	200	0.327	160	0.398	20	0.342
	27	seed640308	750	0.273	190	0.011	40	0.309
	27	seed666079	600	0.441	110	0.458	35	0.473
	27	seed693585	550	0.023	190	0.396	10	0.472
	27	seed759645	250	0.26	120	0.39	20	0.338	0.414461	0.604288	0.491689
	27	seed807321	300	0.296	130	0.412	30	0.454
	27	seed810579	650	0.001	70	0.415	10	0.394
	27	seed831322	400	0.455	160	0.282	20	0.045
	27	seed837284	600	0.019	50	0.456	25	0.048
	27	seed860912	550	0.196	150	0.299	40	0.221
	27	seed914634	450	0.267	60	0.198	40	0.127
	27	seed923422	400	0.39	60	0.461	30	0.012
	27	seed9496	400	0.439	200	0.246	30	0.242
	27	seed992113	600	0.075	160	0.277	25	0.431
	28	seed113704	250	0.274	110	0.023	40	0.144
	28	seed159043	650	0.116	150	0.352	50	0.432
	28	seed181091	450	0.408	150	0.407	10	0.142
	28	seed186720	600	0.155	90	0.215	15	0.065
	28	seed201241	200	0.154	180	0.288	50	0.275
	28	seed218795	400	0.083	60	0.34	35	0.455
	28	seed232222	200	0.487	100	0.168	15	0.016
	28	seed232549	550	0.378	80	0.13	35	0.489
	28	seed258801	400	0.463	120	0.115	15	0.482
	28	seed265179	250	0.36	190	0.494	40	0.198
	28	seed266817	500	0.464	120	0.174	15	0.176
	28	seed282731	550	0.288	140	0.34	20	0.463
	28	seed286219	550	0.182	70	0.081	30	0.226
	28	seed292312	650	0.303	170	0.255	25	0.466
	28	seed302688	700	0.474	120	0.246	30	0.092
	28	seed304663	550	0.359	50	0.002	15	0.282
	28	seed316607	550	0.22	120	0.458	45	0.478
	28	seed39995	300	0.116	100	0.313	50	0.362
	28	seed456078	700	0.401	50	0.226	35	0.023
	28	seed45769	300	0.423	130	0.099	10	0.266
	28	seed507291	250	0.303	180	0.028	50	0.169
	28	seed514247	700	0.185	100	0.439	25	0.434
	28	seed525684	200	0.185	50	0.066	30	0.346
	28	seed544969	450	0.409	60	0.388	15	0.183
	28	seed609274	350	0.217	180	0.45	30	0.431
	28	seed622299	350	0.437	130	0.178	45	0.478
	28	seed623378	450	0.169	110	0.433	30	0.242
	28	seed640308	250	0.308	110	0.37	45	0.118
	28	seed666079	350	0.048	90	0.472	15	0.273
	28	seed693585	700	0.369	100	0.372	45	0.304
	28	seed759645	700	0.212	130	0.197	45	0.213
	28	seed807321	300	0.008	160	0.221	25	0.336
	28	seed810579	600	0.033	50	0.008	35	0.229
	28	seed831322	700	0.307	120	0.314	40	0.435
	28	seed837284	750	0.479	160	0.118	10	0.309
	28	seed860912	400	0.087	160	0.498	45	0.216
	28	seed914634	700	0.249	110	0.49	30	0.079
	28	seed923422	600	0.104	160	0.434	25	0.11
	28	seed9496	650	0.446	160	0.419	40	0.056
	28	seed992113	600	0.238	180	0.041	40	0.216
	29	seed113704	550	0.348	140	0.378	35	0.162
	29	seed159043	350	0.02	150	0.249	30	0.22
	29	seed181091	400	0.402	100	0.368	30	0.118
	29	seed186720	300	0.024	60	0.375	25	0.052
	29	seed201241	350	0.238	100	0.462	20	0.33
	29	seed218795	300	0.24	200	0.16	30	0.232
	29	seed232222	300	0.108	170	0.309	40	0.462
	29	seed232549	750	0.374	180	0.413	15	0.23
	29	seed258801	200	0.114	200	0.182	20	0.115
	29	seed265179	750	0.16	70	0.135	15	0.191	0.408499	0.618578	0.492054
	29	seed266817	400	0.329	180	0.312	15	0.401
	29	seed282731	500	0.34	100	0.342	20	0.329
	29	seed286219	700	0.215	170	0.106	50	0.172
	29	seed292312	300	0.043	150	0.018	20	0.073
	29	seed302688	700	0.081	160	0.151	10	0.13
	29	seed304663	750	0.29	160	0.058	45	0.342
	29	seed316607	700	0.296	180	0.482	50	0.13
	29	seed39995	300	0.081	140	0.174	40	0.119	0.416381	0.602679	0.492501
	29	seed456078	350	0.092	60	0.069	30	0.469
	29	seed45769	200	0.473	90	0.111	50	0.27
	29	seed507291	700	0.447	50	0.371	15	0.283
	29	seed514247	750	0.467	140	0.048	30	0.111
	29	seed525684	200	0.201	100	0.062	20	0.124
	29	seed544969	750	0.013	150	0.062	40	0.481
	29	seed609274	450	0.448	60	0.443	25	0.359
	29	seed622299	450	0.342	200	0.095	35	0.275
	29	seed623378	500	0.202	160	0.142	35	0.049
	29	seed640308	200	0.153	110	0.368	10	0.487
	29	seed666079	450	0.434	150	0.456	20	0.497
	29	seed693585	600	0.18	160	0.457	45	0.491
	29	seed759645	700	0.225	50	0.141	45	0.26
	29	seed807321	650	0.307	80	0.32	30	0.461
	29	seed810579	500	0.061	180	0.081	15	0.417
	29	seed831322	550	0.103	170	0.205	20	0.396
	29	seed837284	500	0.434	110	0.039	25	0.256
	29	seed860912	600	0.203	190	0.308	35	0.217
	29	seed914634	400	0.012	140	0.154	50	0.1
	29	seed923422	450	0.222	140	0.009	30	0.455
	29	seed9496	750	0.095	130	0.16	40	0.184
	29	seed992113	600	0.185	80	0.229	40	0.072
	3	seed113704	200	0.029	180	0.32	45	0.342
	3	seed159043	250	0.004	160	0.157	30	0.179
	3	seed181091	650	0.215	190	0.437	15	0.135
	3	seed186720	400	0.017	180	0.379	25	0.149
	3	seed201241	550	0.174	70	0.059	20	0.306
	3	seed218795	450	0.339	180	0.376	20	0.311
	3	seed232222	400	0.404	90	0.39	35	0.308
	3	seed232549	300	0.311	60	0.35	45	0.115
	3	seed258801	450	0.359	140	0.109	10	0.199
	3	seed265179	650	0.117	130	0.5	15	0.299
	3	seed266817	400	0.199	80	0.036	50	0.242
	3	seed282731	450	0.075	190	0.069	15	0.218
	3	seed286219	400	0.166	150	0.475	25	0.44
	3	seed292312	600	0.484	130	0.424	50	0.108
	3	seed302688	600	0.358	120	0.342	40	0.264
	3	seed304663	650	0.093	110	0.063	20	0.25
	3	seed316607	600	0.487	180	0.442	50	0.4
	3	seed39995	450	0.322	80	0.315	15	0.135
	3	seed456078	650	0.447	160	0.097	50	0.062	0.401661	0.666667	0.501295
	3	seed45769	400	0.051	170	0.43	40	0.348
	3	seed507291	700	0.425	160	0.45	35	0.445
	3	seed514247	400	0.043	120	0.209	40	0.316
	3	seed525684	400	0.256	200	0.19	45	0.014
	3	seed544969	650	0.086	50	0.37	25	0.244
	3	seed609274	550	0.311	200	0.38	30	0.189
	3	seed622299	300	0.044	50	0.112	45	0.329
	3	seed623378	700	0.013	70	0.231	45	0.394
	3	seed640308	500	0.059	130	0.171	40	0.478
	3	seed666079	450	0.324	110	0.265	15	0.44
	3	seed693585	200	0.457	80	0.033	15	0.27
	3	seed759645	600	0.295	80	0.053	50	0.39
	3	seed807321	600	0.015	160	0.12	35	0.497
	3	seed810579	750	0.417	80	0.149	30	0.394
	3	seed831322	200	0.194	170	0.044	45	0.333
	3	seed837284	450	0.028	100	0.209	45	0.469
	3	seed860912	250	0.326	140	0.277	50	0.264
	3	seed914634	450	0.106	190	0.03	25	0.118
	3	seed923422	550	0.097	80	0.368	50	0.489
	3	seed9496	500	0.388	100	0.336	30	0.234
	3	seed992113	200	0.109	90	0.279	45	0.126
	30	seed113704	450	0.202	140	0.003	25	0.368
	30	seed159043	650	0.406	180	0.19	30	0.29
	30	seed181091	400	0.039	130	0.484	30	0.314
	30	seed186720	500	0.202	140	0.319	45	0.238
	30	seed201241	450	0.466	140	0.285	20	0.415
	30	seed218795	200	0.285	110	0.199	10	0.127	0.391021	0.659538	0.490964
	30	seed232222	750	0.315	200	0.129	30	0.06
	30	seed232549	450	0.229	160	0.393	15	0.079
	30	seed258801	650	0.204	160	0.382	15	0.108
	30	seed265179	250	0.416	110	0.345	35	0.212
	30	seed266817	550	0.42	70	0.05	10	0.392
	30	seed282731	450	0.055	100	0.031	15	0.103
	30	seed286219	200	0.275	120	0.332	40	0.054
	30	seed292312	500	0.062	130	0.096	25	0.103
	30	seed302688	250	0.068	90	0.386	20	0.18
	30	seed304663	500	0.117	140	0.037	50	0.212
	30	seed316607	650	0.01	180	0.223	35	0.314
	30	seed39995	650	0.321	200	0.27	40	0.428
	30	seed456078	700	0.199	130	0.045	30	0.108
	30	seed45769	650	0.021	80	0.391	25	0.395
	30	seed507291	300	0.097	140	0.44	50	0.106
	30	seed514247	650	0.137	60	0.11	40	0.491
	30	seed525684	250	0.24	170	0.386	25	0.33
	30	seed544969	550	0.216	50	0.314	20	0.3
	30	seed609274	650	0.258	110	0.304	30	0.394
	30	seed622299	600	0.203	200	0.403	25	0.363
	30	seed623378	450	0.453	200	0.493	20	0.43
	30	seed640308	600	0.144	110	0.034	20	0.125
	30	seed666079	650	0.303	160	0.487	20	0.393
	30	seed759645	650	0.139	90	0.184	20	0.227
	30	seed807321	450	0.169	90	0.009	40	0.001
	30	seed810579	200	0.418	110	0.174	40	0.312
	30	seed831322	700	0.028	190	0.147	20	0.292
	30	seed837284	300	0.016	190	0.228	45	0.414
	30	seed860912	700	0.192	200	0.449	40	0.337
	30	seed914634	450	0.45	140	0.128	15	0.464
	30	seed923422	250	0.199	120	0.269	45	0.312
	30	seed9496	650	0.136	160	0.039	10	0.209
	30	seed992113	500	0.179	120	0.497	45	0.379
	31	seed113704	400	0.169	190	0.263	20	0.252
	31	seed159043	500	0.152	100	0.182	50	0.33
	31	seed181091	750	0.088	160	0.065	40	0.321
	31	seed186720	300	0.317	110	0.235	35	0.422
	31	seed201241	550	0.285	130	0.21	25	0.206
	31	seed218795	500	0.091	160	0.091	25	0.313
	31	seed232222	450	0.359	190	0.173	15	0.386
	31	seed232549	250	0.126	60	0.399	50	0.074
	31	seed258801	250	0.372	200	0.021	35	0.476
	31	seed265179	550	0.195	70	0.296	15	0.083
	31	seed266817	300	0.113	200	0.471	45	0.318
	31	seed282731	550	0.468	100	0.497	45	0.117
	31	seed286219	550	0.219	100	0.43	50	0.173
	31	seed292312	400	0.495	200	0.151	25	0.069
	31	seed302688	600	0.206	140	0.446	50	0.179
	31	seed304663	400	0.083	90	0.471	30	0.023
	31	seed316607	550	0.047	120	0.492	20	0.47
	31	seed39995	700	0.118	170	0.177	20	0.051	0.39699	0.65273	0.493708
	31	seed456078	300	0.171	140	0.254	20	0.227
	31	seed45769	750	0.138	150	0.023	25	0.461
	31	seed507291	700	0.08	160	0.189	10	0.288
	31	seed514247	250	0.066	160	0.086	45	0.352
	31	seed525684	300	0.21	180	0.012	25	0.035
	31	seed544969	400	0.492	80	0.119	35	0.446
	31	seed609274	300	0.439	100	0.312	40	0.14
	31	seed622299	500	0.359	90	0.058	25	0.45
	31	seed623378	600	0.292	180	0.019	10	0.346
	31	seed640308	750	0.43	70	0.136	40	0.437
	31	seed666079	450	0.114	180	0.191	35	0.247
	31	seed759645	550	0.096	140	0.483	35	0.493
	31	seed807321	750	0.375	170	0.196	10	0.476
	31	seed810579	200	0.207	190	0.047	30	0.019
	31	seed831322	450	0.132	50	0.046	35	0.218
	31	seed837284	650	0.169	170	0.482	10	0.243
	31	seed860912	750	0.032	80	0.363	35	0.445
	31	seed914634	750	0.079	170	0.164	25	0.061
	31	seed923422	300	0.262	140	0.066	50	0.328
	31	seed9496	650	0.047	100	0.31	35	0.153
	31	seed992113	300	0.02	160	0.438	30	0.203
	32	seed113704	250	0.367	130	0.1	20	0.475
	32	seed159043	450	0.188	110	0.306	20	0.012	0.431067	0.589404	0.497952
	32	seed181091	300	0.057	200	0.123	45	0.217
	32	seed186720	750	0.443	100	0.403	30	0.171
	32	seed201241	550	0.216	90	0.04	15	0.213
	32	seed218795	500	0.432	130	0.29	50	0.274
	32	seed232222	700	0.2	150	0.006	50	0.27
	32	seed232549	600	0.49	190	0.084	35	0.446
	32	seed258801	300	0.378	180	0.055	35	0.154
	32	seed265179	500	0.069	190	0.193	50	0.383
	32	seed266817	550	0.292	50	0.448	10	0.201
	32	seed282731	700	0.148	110	0.142	10	0.48
	32	seed286219	200	0.453	190	0.248	40	0.176
	32	seed292312	600	0.363	180	0.211	35	0.245
	32	seed302688	200	0.434	140	0.043	35	0.465
	32	seed304663	600	0.167	100	0.072	10	0.256
	32	seed316607	200	0.263	150	0.088	10	0.011
	32	seed39995	700	0.47	190	0.024	50	0.28	0.419651	0.610468	0.497386
	32	seed456078	300	0.446	200	0.006	35	0.151
	32	seed45769	200	0.185	140	0.452	50	0.213
	32	seed507291	750	0.294	130	0.495	10	0.027	0.410137	0.628079	0.496233
	32	seed514247	450	0.296	160	0.445	15	0.172
	32	seed525684	200	0.373	80	0.155	40	0.44
	32	seed544969	200	0.299	180	0.23	40	0.162
	32	seed609274	500	0.059	140	0.147	25	0.48
	32	seed622299	300	0.109	50	0.265	50	0.445
	32	seed623378	700	0.175	200	0.069	10	0.226
	32	seed640308	650	0.442	170	0.05	20	0.327
	32	seed666079	550	0.132	190	0.325	35	0.37
	32	seed759645	500	0.407	170	0.435	30	0.392
	32	seed807321	650	0.34	160	0.267	10	0.087
	32	seed810579	200	0.188	150	0.234	40	0.338
	32	seed831322	550	0.25	140	0.279	10	0.448
	32	seed837284	500	0.497	100	0.307	20	0.287
	32	seed860912	400	0.024	110	0.352	15	0.026
	32	seed914634	550	0.321	180	0.271	40	0.297
	32	seed923422	300	0.008	190	0.339	50	0.42
	32	seed9496	450	0.045	80	0.419	15	0.09
	32	seed992113	600	0.206	110	0.437	45	0.131
	33	seed113704	400	0.045	150	0.219	15	0.08	0.414115	0.613532	0.494475
	33	seed159043	600	0.113	70	0.406	25	0.157
	33	seed181091	500	0.43	90	0.048	20	0.34	0.415326	0.628863	0.50026
	33	seed186720	350	0.418	160	0.325	25	0.034
	33	seed201241	450	0.138	170	0.303	25	0.134
	33	seed218795	650	0.192	170	0.296	20	0.489
	33	seed232222	700	0.443	180	0.206	35	0.209
	33	seed232549	250	0.181	50	0.011	30	0.048
	33	seed258801	750	0.492	90	0.108	45	0.363
	33	seed265179	200	0.101	160	0.006	35	0.487
	33	seed266817	350	0.153	110	0.411	15	0.36
	33	seed282731	250	0.135	160	0.417	45	0.299
	33	seed286219	700	0.445	90	0.269	25	0.294
	33	seed292312	550	0.361	50	0.177	30	0.374
	33	seed302688	750	0.415	100	0.425	20	0.317
	33	seed304663	200	0.039	80	0.273	25	0.42
	33	seed316607	700	0.142	80	0.087	30	0.339
	33	seed39995	300	0.212	170	0.346	45	0.277
	33	seed456078	750	0.113	130	0.203	20	0.003
	33	seed45769	550	0.256	170	0.204	20	0.143
	33	seed507291	300	0.213	180	0.086	30	0.382
	33	seed514247	300	0.25	60	0.312	10	0.481
	33	seed525684	700	0.168	140	0.093	15	0.153
	33	seed544969	650	0.484	200	0.313	40	0.215
	33	seed609274	650	0.221	180	0.309	40	0.396
	33	seed622299	500	0.426	120	0.446	20	0.395
	33	seed623378	600	0.483	170	0.187	30	0.034
	33	seed640308	450	0.333	190	0.357	10	0.055
	33	seed666079	450	0.078	130	0.204	10	0.214
	33	seed759645	750	0.249	110	0.308	35	0.226
	33	seed807321	550	0.455	130	0.359	40	0.488
	33	seed810579	450	0.474	180	0.208	10	0.438
	33	seed831322	250	0.398	180	0.115	25	0.069
	33	seed837284	400	0.156	80	0.367	10	0.422
	33	seed860912	250	0.24	160	0.451	20	0.283
	33	seed914634	250	0.091	190	0.256	40	0.458
	33	seed923422	250	0.418	190	0.427	35	0.441
	33	seed9496	200	0.03	100	0.033	25	0.208
	33	seed992113	400	0.002	180	0.281	30	0.095
	34	seed113704	600	0.456	190	0.118	40	0.196
	34	seed159043	550	0.347	100	0.023	45	0.375
	34	seed181091	200	0.228	150	0.214	20	0.281
	34	seed186720	300	0.476	60	0.275	20	0.474
	34	seed201241	550	0.498	170	0.285	40	0.442
	34	seed218795	350	0.311	50	0.462	15	0.371
	34	seed232222	750	0.245	110	0.179	20	0.19
	34	seed232549	650	0.447	180	0.137	35	0.192
	34	seed258801	500	0.282	50	0.176	30	0.157
	34	seed265179	550	0.182	130	0.196	50	0.302
	34	seed266817	250	0.372	100	0.003	50	0.29
	34	seed282731	600	0.353	60	0.071	35	0.467
	34	seed286219	250	0.345	70	0.412	25	0.5
	34	seed292312	200	0.278	50	0.197	20	0.423
	34	seed302688	200	0.411	200	0.152	25	0.395
	34	seed304663	650	0.121	170	0.044	15	0.243
	34	seed316607	250	0.175	90	0.342	45	0.405
	34	seed456078	450	0.179	70	0.5	15	0.395
	34	seed45769	750	0.382	140	0.076	20	0.14
	34	seed507291	200	0.369	130	0.304	20	0.385
	34	seed514247	450	0.248	180	0.427	45	0.003
	34	seed525684	350	0.085	110	0.01	20	0.384
	34	seed544969	300	0.142	70	0.443	50	0.434
	34	seed609274	500	0.309	80	0.379	20	0.442
	34	seed622299	700	0.329	100	0.042	35	0.431
	34	seed623378	250	0.237	120	0.257	50	0.318
	34	seed640308	350	0.272	110	0.491	40	0.218
	34	seed666079	500	0.156	60	0.068	40	0.013
	34	seed759645	600	0.401	190	0.291	50	0.023
	34	seed807321	650	0.028	170	0.464	15	0.065
	34	seed810579	350	0.043	150	0.231	25	0.458
	34	seed831322	450	0.215	120	0.14	20	0.343
	34	seed837284	750	0.329	50	0.117	45	0.314
	34	seed860912	250	0.226	70	0.06	30	0.318
	34	seed914634	250	0.18	100	0.013	35	0.093
	34	seed923422	250	0.46	110	0.279	15	0.265
	34	seed9496	500	0.211	120	0.342	20	0.054
	35	seed113704	550	0.291	200	0.398	20	0.444
	35	seed159043	450	0.342	110	0.196	10	0.017
	35	seed181091	650	0.182	190	0.014	35	0.475
	35	seed186720	250	0.083	90	0.056	15	0.412
	35	seed201241	300	0.117	90	0.222	50	0.173
	35	seed218795	650	0.102	50	0.143	40	0.162
	35	seed232222	600	0.451	60	0.211	30	0.3
	35	seed232549	300	0.372	130	0.001	40	0.058
	35	seed258801	400	0.116	180	0.067	45	0.49
	35	seed265179	650	0.04	180	0.42	25	0.293
	35	seed266817	350	0.163	50	0.201	50	0.478
	35	seed282731	600	0.054	140	0.327	25	0.448
	35	seed292312	250	0.017	200	0.085	50	0.041
	35	seed302688	550	0.02	150	0.3	50	0.104
	35	seed304663	600	0.238	120	0.21	50	0.099
	35	seed316607	250	0.238	120	0.336	35	0.411
	35	seed456078	450	0.278	80	0.136	45	0.009
	35	seed45769	650	0.153	80	0.069	10	0.116
	35	seed507291	400	0.214	110	0.43	30	0.106
	35	seed514247	200	0.112	160	0.367	15	0.019
	35	seed525684	200	0.036	180	0.24	25	0.115
	35	seed544969	600	0.166	130	0.498	50	0.424
	35	seed609274	600	0.042	100	0.071	50	0.029
	35	seed622299	600	0.202	100	0.382	10	0.06
	35	seed623378	300	0.442	190	0.485	35	0.091
	35	seed640308	250	0.422	180	0.45	10	0.244
	35	seed666079	550	0.095	80	0.102	25	0.064
	35	seed759645	600	0.081	70	0.227	35	0.153
	35	seed807321	250	0.017	100	0.132	30	0.094
	35	seed810579	600	0.309	170	0.308	25	0.493
	35	seed831322	200	0.443	200	0.204	20	0.215
	35	seed837284	250	0.246	160	0.414	35	0.105
	35	seed860912	700	0.438	50	0.482	15	0.146
	35	seed914634	600	0.194	200	0.244	50	0.243
	35	seed923422	650	0.261	120	0.458	10	0.24
	35	seed9496	200	0.329	60	0.228	20	0.139
	36	seed113704	250	0.18	180	0.056	20	0.297
	36	seed159043	500	0.264	90	0.023	30	0.267
	36	seed181091	550	0.448	150	0.266	10	0.134
	36	seed186720	650	0.332	60	0.239	35	0.192
	36	seed201241	400	0.096	60	0.218	35	0.028
	36	seed218795	350	0.399	180	0.043	25	0.419
	36	seed232222	550	0.129	170	0.419	50	0.024
	36	seed232549	350	0.008	60	0.413	10	0.41
	36	seed258801	250	0.305	190	0.184	40	0.071
	36	seed265179	250	0.18	140	0.313	35	0.045
	36	seed266817	700	0.49	50	0.027	45	0.037
	36	seed282731	450	0.119	50	0.253	30	0.354
	36	seed292312	400	0.361	170	0.448	25	0.435
	36	seed302688	550	0.038	180	0.353	25	0.407
	36	seed304663	550	0.211	50	0.347	35	0.08
	36	seed316607	450	0.449	80	0.139	25	0.137
	36	seed456078	350	0.388	170	0.432	20	0.333
	36	seed45769	200	0.49	170	0.005	15	0.35	0.415672	0.610673	0.494648
	36	seed507291	650	0.001	90	0.208	45	0.213
	36	seed514247	600	0.468	130	0.249	45	0.159	0.434354	0.5746	0.49473
	36	seed525684	300	0.141	170	0.096	40	0.077
	36	seed544969	450	0.469	160	0.03	40	0.209	0.399066	0.63959	0.491478
	36	seed609274	450	0.204	110	0.185	50	0.27
	36	seed622299	700	0.031	190	0.344	45	0.368
	36	seed623378	400	0.373	60	0.266	35	0.014
	36	seed640308	400	0.294	90	0.07	45	0.02
	36	seed666079	300	0.036	150	0.195	25	0.316
	36	seed759645	550	0.002	140	0.094	30	0.2
	36	seed807321	400	0.159	110	0.259	35	0.147
	36	seed810579	650	0.328	120	0.207	15	0.486
	36	seed831322	650	0.188	70	0.48	35	0.215
	36	seed837284	350	0.284	50	0.2	10	0.386
	36	seed860912	250	0.445	190	0.388	20	0.351
	36	seed914634	250	0.231	70	0.448	30	0.414
	36	seed923422	750	0.043	70	0.25	30	0.186
	36	seed9496	600	0.115	160	0.299	40	0.022
	37	seed113704	350	0.141	120	0.228	20	0.432
	37	seed159043	200	0.153	160	0.444	15	0.447
	37	seed181091	500	0.268	160	0.461	40	0.114
	37	seed186720	650	0.339	60	0.398	15	0.466
	37	seed201241	300	0.323	130	0.284	50	0.188
	37	seed218795	700	0.052	190	0.142	15	0.282
	37	seed232222	750	0.152	120	0.076	20	0.28
	37	seed232549	650	0.173	200	0.123	30	0.336
	37	seed258801	250	0.114	130	0.221	40	0.413
	37	seed265179	250	0.377	200	0.363	10	0.144
	37	seed266817	600	0.066	180	0.001	30	0.456
	37	seed282731	750	0.393	120	0.39	40	0.077
	37	seed292312	300	0.344	120	0.386	40	0.024
	37	seed302688	650	0.484	50	0.193	15	0.099
	37	seed304663	350	0.48	70	0.334	30	0.419
	37	seed316607	250	0.017	150	0.206	20	0.431
	37	seed456078	700	0.397	180	0.287	20	0.057
	37	seed45769	750	0.475	140	0.392	25	0.054
	37	seed507291	200	0.073	70	0.388	25	0.078
	37	seed514247	300	0.424	100	0.278	15	0.11
	37	seed525684	600	0.346	90	0.474	35	0.286
	37	seed544969	350	0.273	110	0.173	40	0.322
	37	seed609274	450	0.238	110	0.221	50	0.376
	37	seed622299	250	0.331	170	0.321	35	0.166
	37	seed623378	200	0.37	80	0.497	20	0.21
	37	seed640308	200	0.403	90	0.247	45	0.158
	37	seed666079	200	0.128	170	0.2	40	0.38
	37	seed759645	300	0.099	120	0.023	40	0.461
	37	seed807321	250	0.391	160	0.237	35	0.231
	37	seed810579	600	0.472	150	0.46	10	0.056
	37	seed831322	300	0.116	70	0.032	35	0.039
	37	seed837284	700	0.296	100	0.458	30	0.424
	37	seed860912	750	0.059	120	0.389	35	0.336
	37	seed914634	500	0.095	70	0.36	40	0.461
	37	seed923422	700	0.337	150	0.184	20	0.275
	37	seed9496	500	0.129	60	0.235	10	0.337
	38	seed113704	250	0.046	200	0.126	45	0.269
	38	seed159043	400	0.358	150	0.277	15	0.018	0.400623	0.639426	0.492609
	38	seed181091	300	0.3	90	0.338	45	0.068
	38	seed186720	300	0.106	180	0.057	40	0.465
	38	seed201241	300	0.137	50	0.106	20	0.043
	38	seed218795	200	0.194	140	0.036	20	0.247	0.38419	0.684016	0.492025
	38	seed232222	650	0.008	100	0.447	45	0.197
	38	seed232549	500	0.301	120	0.295	35	0.385
	38	seed258801	350	0.294	100	0.18	30	0.497
	38	seed265179	250	0.009	160	0.023	20	0.161
	38	seed266817	600	0.026	80	0.075	40	0.382
	38	seed282731	700	0.023	170	0.412	20	0.462
	38	seed292312	350	0.184	170	0.131	45	0.178
	38	seed302688	250	0.038	90	0.412	35	0.405
	38	seed304663	550	0.101	150	0.147	15	0.46
	38	seed316607	600	0.073	80	0.31	35	0.258
	38	seed456078	200	0.412	90	0.219	30	0.142
	38	seed45769	650	0.014	50	0.498	50	0.085
	38	seed507291	300	0.237	60	0.438	45	0.063
	38	seed514247	750	0.22	200	0.347	15	0.484
	38	seed525684	750	0.316	80	0.146	30	0.19
	38	seed544969	750	0.217	140	0.193	35	0.221
	38	seed609274	400	0.2	70	0.139	15	0.052
	38	seed622299	550	0.102	180	0.238	30	0.288
	38	seed623378	400	0.484	100	0.302	40	0.175
	38	seed640308	400	0.386	100	0.171	45	0.471
	38	seed666079	200	0.431	190	0.348	10	0.274
	38	seed759645	600	0.074	190	0.253	10	0.406
	38	seed807321	300	0.347	80	0.429	50	0.052
	38	seed810579	500	0.249	180	0.33	20	0.39
	38	seed831322	500	0.171	60	0.431	20	0.097
	38	seed837284	400	0.008	80	0.06	25	0.475
	38	seed860912	600	0.417	190	0.347	15	0.091
	38	seed914634	650	0.386	180	0.374	10	0.315
	38	seed923422	550	0.34	130	0.187	35	0.348
	38	seed9496	200	0.302	60	0.19	30	0.432
	39	seed113704	350	0.03	160	0.152	10	0.21
	39	seed159043	650	0.189	150	0.351	20	0.29
	39	seed181091	700	0.216	120	0.309	30	0.471
	39	seed186720	500	0.253	170	0.181	25	0.479
	39	seed201241	450	0.185	180	0.269	50	0.061
	39	seed218795	200	0.043	70	0.05	30	0.299
	39	seed232222	500	0.422	170	0.267	30	0.221
	39	seed232549	400	0.094	50	0.22	30	0.443
	39	seed258801	750	0.354	90	0.089	25	0.469
	39	seed265179	500	0.373	60	0.123	35	0.408
	39	seed266817	700	0.366	110	0.361	30	0.226
	39	seed282731	550	0.314	170	0.292	10	0.334
	39	seed292312	400	0.489	120	0.326	15	0.416
	39	seed302688	450	0.168	90	0.011	15	0.333
	39	seed304663	350	0.037	120	0.103	50	0.346
	39	seed316607	750	0.278	90	0.087	20	0.116
	39	seed456078	400	0.351	140	0.113	20	0.209	0.418267	0.597923	0.492214
	39	seed45769	550	0.337	120	0.431	45	0.474
	39	seed507291	450	0.217	50	0.286	30	0.463
	39	seed514247	750	0.497	190	0.339	15	0.221
	39	seed525684	450	0.449	140	0.135	10	0.018
	39	seed544969	650	0.135	90	0.375	50	0.464
	39	seed609274	250	0.22	100	0.133	35	0.289
	39	seed622299	750	0.239	80	0.041	25	0.178
	39	seed623378	700	0.27	80	0.049	10	0.484
	39	seed640308	200	0.089	150	0.494	50	0.227
	39	seed666079	700	0.344	150	0.165	40	0.345
	39	seed759645	300	0.319	200	0.289	45	0.088
	39	seed807321	650	0.441	180	0.074	25	0.096
	39	seed810579	350	0.317	160	0.179	30	0.057
	39	seed831322	650	0.434	100	0.434	50	0.261
	39	seed837284	600	0.172	120	0.435	15	0.497
	39	seed860912	700	0.13	180	0.456	45	0.194
	39	seed914634	750	0.416	100	0.308	10	0.284	0.431759	0.588957	0.498253
	39	seed923422	250	0.116	190	0.306	30	0.356
	39	seed9496	400	0.442	80	0.463	40	0.1
	4	seed113704	300	0.035	70	0.299	50	0.133
	4	seed159043	600	0.283	140	0.054	30	0.397
	4	seed181091	700	0.123	60	0.219	30	0.408
	4	seed186720	700	0.358	100	0.38	20	0.014
	4	seed201241	550	0.336	80	0.227	30	0.47
	4	seed218795	600	0.412	100	0.099	50	0.278
	4	seed232222	750	0.373	180	0.071	40	0.132	0.426397	0.590985	0.495378
	4	seed232549	700	0.459	170	0.057	15	0.435
	4	seed258801	400	0.433	90	0.367	40	0.368
	4	seed265179	550	0.11	70	0.063	20	0.278
	4	seed266817	350	0.282	200	0.038	45	0.253	0.435911	0.56872	0.493537
	4	seed282731	400	0.22	100	0.051	45	0.321
	4	seed286219	500	0.385	170	0.013	10	0.29
	4	seed292312	600	0.294	180	0.393	10	0.16	0.40512	0.636067	0.49498
	4	seed302688	200	0.314	160	0.414	10	0.023
	4	seed304663	450	0.454	70	0.002	10	0.259
	4	seed316607	250	0.407	190	0.15	30	0.45
	4	seed39995	250	0.154	80	0.212	10	0.466
	4	seed456078	650	0.36	90	0.257	30	0.105
	4	seed45769	650	0.319	110	0.347	25	0.115
	4	seed507291	700	0.116	60	0.171	50	0.462
	4	seed514247	600	0.454	160	0.001	15	0.161
	4	seed525684	650	0.06	70	0.075	15	0.374
	4	seed544969	450	0.457	100	0.155	20	0.106
	4	seed609274	650	0.444	200	0.14	35	0.344
	4	seed622299	750	0.014	160	0.266	50	0.113
	4	seed623378	450	0.16	50	0.378	40	0.415
	4	seed640308	300	0.157	100	0.044	45	0.126
	4	seed666079	550	0.104	170	0.234	25	0.19
	4	seed693585	600	0.418	180	0.378	50	0.467
	4	seed759645	500	0.028	120	0.038	50	0.225
	4	seed807321	450	0.267	120	0.093	10	0.224
	4	seed810579	250	0.224	60	0.443	15	0.211
	4	seed831322	400	0.156	90	0.293	20	0.207
	4	seed837284	450	0.147	50	0.41	15	0.285
	4	seed860912	700	0.489	130	0.343	25	0.233
	4	seed914634	350	0.153	50	0.067	25	0.469
	4	seed923422	450	0.086	190	0.181	40	0.282
	4	seed9496	600	0.185	50	0.092	35	0.472
	4	seed992113	200	0.205	140	0.368	20	0.362
	40	seed113704	750	0.438	130	0.488	10	0.452
	40	seed159043	250	0.036	150	0.009	30	0.252
	40	seed181091	600	0.269	150	0.384	45	0.402
	40	seed186720	250	0.081	80	0.01	25	0.349
	40	seed201241	650	0.499	130	0.321	45	0.071
	40	seed218795	300	0.013	110	0.445	25	0.297
	40	seed232222	700	0.328	170	0.021	50	0.199
	40	seed232549	550	0.489	140	0.463	40	0.143
	40	seed258801	750	0.243	60	0.167	35	0.058
	40	seed265179	550	0.269	180	0.313	50	0.486
	40	seed266817	700	0.26	80	0.077	50	0.047
	40	seed282731	350	0.047	80	0.386	40	0.053
	40	seed292312	300	0.455	100	0.008	50	0.458
	40	seed302688	500	0.278	160	0.077	15	0.303
	40	seed304663	250	0.165	90	0.179	50	0.486
	40	seed316607	400	0.201	180	0.258	10	0.307
	40	seed456078	600	0.264	90	0.275	30	0.3
	40	seed45769	600	0.39	60	0.206	25	0.014	0.401834	0.642067	0.494308
	40	seed507291	450	0.161	60	0.275	30	0.434
	40	seed514247	250	0.16	110	0.466	10	0.139
	40	seed525684	400	0.05	90	0.268	35	0.24
	40	seed544969	350	0.468	160	0.095	50	0.396
	40	seed609274	450	0.086	50	0.125	50	0.154
	40	seed622299	250	0.056	160	0.212	15	0.333
	40	seed623378	500	0.422	130	0.145	25	0.089
	40	seed640308	350	0.385	150	0.123	35	0.113
	40	seed666079	300	0.002	50	0.404	25	0.069
	40	seed759645	450	0.483	70	0.263	35	0.3
	40	seed807321	650	0.305	50	0.227	20	0.266
	40	seed810579	500	0.338	80	0.312	45	0.39
	40	seed831322	650	0.171	110	0.317	40	0.071
	40	seed837284	450	0.403	160	0.472	40	0.25
	40	seed860912	250	0.445	60	0.159	50	0.493
	40	seed914634	350	0.458	180	0.072	10	0.166
	40	seed923422	450	0.055	60	0.034	10	0.139
	40	seed9496	300	0.294	120	0.186	10	0.146
	41	seed113704	400	0.231	80	0.481	10	0.097
	41	seed159043	350	0.498	70	0.12	45	0.172
	41	seed181091	550	0.113	200	0.455	25	0.385
	41	seed186720	350	0.155	60	0.269	50	0.105
	41	seed201241	550	0.093	80	0.089	35	0.2
	41	seed218795	600	0.24	190	0.396	25	0.286
	41	seed232222	300	0.021	200	0.087	15	0.044
	41	seed232549	450	0.229	120	0.42	50	0.089
	41	seed258801	650	0.486	130	0.228	10	0.097
	41	seed265179	300	0.287	190	0.012	50	0.144
	41	seed266817	600	0.217	160	0.18	25	0.052
	41	seed282731	750	0.168	180	0.442	25	0.342
	41	seed292312	400	0.259	110	0.391	50	0.133
	41	seed302688	600	0.282	180	0.499	25	0.243
	41	seed304663	650	0.225	180	0.086	20	0.223
	41	seed316607	400	0.401	50	0.282	40	0.012
	41	seed456078	600	0.04	80	0.122	30	0.037
	41	seed45769	400	0.371	80	0.211	25	0.018
	41	seed507291	250	0.496	50	0.475	35	0.052
	41	seed514247	550	0.069	200	0.272	20	0.354
	41	seed525684	750	0.045	90	0.096	40	0.04
	41	seed544969	700	0.392	90	0.204	40	0.063
	41	seed609274	200	0.137	90	0.099	35	0.342
	41	seed622299	500	0.255	60	0.203	10	0.335
	41	seed623378	500	0.173	90	0.076	35	0.173	0.398893	0.644134	0.492682
	41	seed640308	350	0.055	200	0.137	20	0.459
	41	seed666079	700	0.237	150	0.268	10	0.414
	41	seed759645	450	0.063	120	0.106	50	0.203
	41	seed807321	450	0.083	80	0.239	20	0.315
	41	seed810579	300	0.407	120	0.174	25	0.076
	41	seed831322	750	0.492	200	0.075	20	0.418
	41	seed837284	300	0.245	110	0.482	20	0.212
	41	seed860912	550	0.009	130	0.281	10	0.485
	41	seed914634	400	0.299	150	0.352	10	0.31
	41	seed923422	300	0.168	60	0.409	30	0.292
	41	seed9496	550	0.481	50	0.191	25	0.361
	42	seed113704	200	0.027	80	0.386	10	0.139
	42	seed159043	500	0.28	170	0.469	40	0.241
	42	seed181091	700	0.361	180	0.213	30	0.461
	42	seed186720	600	0.211	140	0.386	20	0.281
	42	seed201241	700	0.468	50	0.308	15	0.075
	42	seed218795	600	0.355	150	0.438	10	0.004
	42	seed232222	350	0.186	120	0.31	10	0.266	0.403909	0.638153	0.494703
	42	seed232549	200	0.121	130	0.374	35	0.031
	42	seed258801	300	0.328	100	0.04	15	0.111
	42	seed265179	750	0.398	110	0.475	25	0.45
	42	seed266817	550	0.413	90	0.235	45	0.487
	42	seed282731	650	0.428	50	0.422	15	0.246
	42	seed292312	400	0.354	170	0.064	35	0.24
	42	seed302688	750	0.129	190	0.434	45	0.047
	42	seed304663	650	0.346	50	0.265	15	0.003
	42	seed316607	200	0.407	200	0.154	15	0.173
	42	seed456078	700	0.096	70	0.479	40	0.237	0.439024	0.5733	0.497257
	42	seed45769	300	0.465	110	0.055	30	0.096
	42	seed507291	600	0.025	100	0.001	15	0.336
	42	seed514247	250	0.309	50	0.051	15	0.036	0.405985	0.624202	0.491982
	42	seed525684	600	0.113	170	0.139	20	0.384
	42	seed544969	600	0.017	120	0.085	15	0.14
	42	seed609274	200	0.141	80	0.334	50	0.411
	42	seed622299	400	0.097	110	0.043	10	0.327
	42	seed623378	600	0.047	140	0.251	35	0.091	0.433489	0.565433	0.490747
	42	seed640308	400	0.251	200	0.367	10	0.174
	42	seed666079	650	0.247	110	0.029	50	0.012
	42	seed759645	550	0.419	200	0.448	25	0.237
	42	seed807321	450	0.288	140	0.407	40	0.339
	42	seed810579	650	0.432	50	0.106	25	0.011
	42	seed831322	750	0.291	50	0.453	30	0.46
	42	seed837284	550	0.261	130	0.072	40	0.417
	42	seed860912	250	0.209	170	0.121	30	0.411
	42	seed914634	600	0.036	120	0.428	30	0.127
	42	seed923422	650	0.449	190	0.434	20	0.487
	42	seed9496	650	0.466	80	0.375	45	0.256
	43	seed113704	400	0.099	140	0.061	30	0.421
	43	seed159043	600	0.09	80	0.083	30	0.341
	43	seed181091	750	0.105	120	0.303	45	0.292
	43	seed186720	500	0.208	130	0.249	15	0.478
	43	seed201241	550	0.431	200	0.379	40	0.261
	43	seed218795	350	0.381	180	0.436	20	0.02
	43	seed232222	300	0.353	80	0.296	35	0.308
	43	seed232549	450	0.188	170	0.133	45	0.119
	43	seed258801	650	0.394	80	0.186	45	0.43
	43	seed265179	250	0.366	160	0.171	40	0.49
	43	seed266817	350	0.044	60	0.202	40	0.001
	43	seed282731	500	0.067	60	0.015	35	0.226
	43	seed292312	350	0.298	90	0.285	15	0.391
	43	seed302688	500	0.226	120	0.41	50	0.268
	43	seed304663	700	0.281	200	0.195	35	0.46
	43	seed316607	350	0.184	200	0.192	15	0.437	0.4283	0.575948	0.49127
	43	seed456078	550	0.077	130	0.109	30	0.373
	43	seed507291	350	0.164	160	0.355	15	0.083
	43	seed514247	650	0.044	60	0.146	30	0.292
	43	seed525684	500	0.249	80	0.379	30	0.175
	43	seed544969	750	0.422	130	0.475	50	0.245
	43	seed609274	550	0.306	60	0.481	15	0.409
	43	seed622299	400	0.36	50	0.265	40	0.174
	43	seed623378	250	0.043	160	0.021	35	0.105
	43	seed640308	550	0.339	140	0.066	40	0.149
	43	seed666079	600	0.281	70	0.403	15	0.116
	43	seed759645	700	0.021	60	0.428	35	0.013
	43	seed807321	250	0.232	150	0.465	25	0.22
	43	seed810579	550	0.349	100	0.34	10	0.11
	43	seed831322	350	0.31	180	0.235	25	0.41
	43	seed837284	650	0.098	200	0.435	10	0.416
	43	seed860912	300	0.42	180	0.284	20	0.074
	43	seed914634	200	0.107	80	0.284	35	0.344
	43	seed923422	250	0.31	90	0.085	50	0.116
	43	seed9496	350	0.287	200	0.423	25	0.103
	44	seed113704	500	0.062	160	0.498	15	0.441
	44	seed159043	250	0.143	180	0.402	30	0.392
	44	seed181091	550	0.112	200	0.143	35	0.498
	44	seed186720	600	0.298	80	0.159	40	0.401
	44	seed201241	500	0.309	60	0.319	40	0.435
	44	seed218795	300	0.216	120	0.125	45	0.234
	44	seed232222	750	0.326	110	0.279	45	0.173
	44	seed232549	450	0.32	150	0.261	25	0.11
	44	seed258801	450	0.125	140	0.217	10	0.428
	44	seed265179	650	0.054	60	0.009	35	0.132
	44	seed266817	250	0.446	100	0.181	30	0.221
	44	seed282731	600	0.11	140	0.07	40	0.294	0.416018	0.611492	0.495162
	44	seed292312	450	0.155	80	0.092	35	0.075
	44	seed302688	300	0.455	80	0.349	30	0.134
	44	seed304663	650	0.022	170	0.028	30	0.421
	44	seed316607	650	0.074	180	0.429	35	0.414
	44	seed456078	400	0.349	100	0.174	35	0.398
	44	seed507291	650	0.486	90	0.38	30	0.174
	44	seed514247	750	0.188	190	0.221	30	0.209
	44	seed525684	250	0.062	70	0.038	10	0.05
	44	seed544969	650	0.246	150	0.226	15	0.197
	44	seed609274	650	0.34	50	0.458	35	0.372
	44	seed622299	700	0.281	100	0.147	20	0.002
	44	seed623378	350	0.005	70	0.248	10	0.012
	44	seed640308	500	0.14	170	0.435	40	0.343
	44	seed666079	250	0.477	170	0.272	30	0.081
	44	seed759645	550	0.336	60	0.48	30	0.125
	44	seed807321	600	0.353	50	0.088	20	0.388
	44	seed810579	400	0.08	90	0.04	30	0.25
	44	seed831322	200	0.09	90	0.483	40	0.307
	44	seed837284	650	0.256	50	0.363	40	0.334
	44	seed860912	400	0.413	190	0.211	40	0.413
	44	seed914634	450	0.033	100	0.217	30	0.263
	44	seed923422	400	0.076	100	0.179	50	0.246
	44	seed9496	400	0.248	70	0.389	50	0.208
	45	seed113704	250	0.128	180	0.474	25	0.16
	45	seed159043	400	0.136	50	0.064	20	0.401
	45	seed181091	200	0.018	130	0.314	20	0.092
	45	seed186720	250	0.036	190	0.288	45	0.348
	45	seed201241	200	0.44	130	0.345	50	0.054
	45	seed218795	250	0.044	70	0.268	20	0.074
	45	seed232222	400	0.333	150	0.132	30	0.409
	45	seed232549	400	0.091	200	0.225	30	0.473
	45	seed258801	300	0.325	170	0.131	25	0.432
	45	seed265179	350	0.211	60	0.438	20	0.284
	45	seed266817	550	0.38	60	0.29	10	0.192
	45	seed282731	550	0.327	70	0.316	20	0.264
	45	seed292312	300	0.124	200	0.032	35	0.345
	45	seed302688	400	0.463	130	0.21	15	0.475
	45	seed304663	550	0.133	190	0.168	20	0.028
	45	seed316607	650	0.166	160	0.132	15	0.366
	45	seed456078	300	0.475	140	0.431	25	0.097
	45	seed507291	700	0.329	180	0.083	50	0.118
	45	seed514247	750	0.087	100	0.038	10	0.459
	45	seed525684	500	0.342	100	0.171	30	0.41	0.395779	0.671756	0.498095
	45	seed544969	200	0.197	150	0.05	15	0.473
	45	seed609274	500	0.001	160	0.401	40	0.33
	45	seed622299	400	0.235	200	0.347	25	0.166
	45	seed623378	550	0.354	170	0.474	40	0.467
	45	seed640308	350	0.489	70	0.09	30	0.497
	45	seed666079	350	0.409	120	0.088	30	0.269
	45	seed759645	250	0.011	110	0.499	40	0.32
	45	seed807321	350	0.125	130	0.442	35	0.149
	45	seed810579	400	0.435	80	0.175	35	0.185	0.438678	0.585952	0.501731
	45	seed831322	450	0.016	150	0.198	40	0.26
	45	seed837284	750	0.371	200	0.07	45	0.036
	45	seed860912	200	0.468	150	0.393	35	0.149
	45	seed914634	700	0.093	50	0.354	50	0.106
	45	seed923422	650	0.133	150	0.476	40	0.246
	45	seed9496	550	0.379	50	0.264	20	0.483
	46	seed113704	200	0.296	80	0.411	50	0.272
	46	seed159043	400	0.171	140	0.47	15	0.383
	46	seed181091	250	0.214	90	0.049	40	0.094
	46	seed186720	450	0.373	170	0.278	30	0.004	0.402007	0.65098	0.497059
	46	seed201241	250	0.012	60	0.364	35	0.253
	46	seed218795	350	0.48	90	0.26	50	0.146
	46	seed232222	500	0.232	50	0.352	40	0.34
	46	seed232549	450	0.203	190	0.297	25	0.08
	46	seed258801	650	0.416	190	0.483	35	0.076
	46	seed265179	700	0.442	150	0.367	15	0.129
	46	seed266817	700	0.126	160	0.195	20	0.29
	46	seed282731	400	0.055	90	0.2	30	0.135
	46	seed292312	550	0.337	70	0.355	50	0.002	0.41152	0.614888	0.493057
	46	seed302688	750	0.334	160	0.417	10	0.069
	46	seed304663	550	0.116	100	0.437	35	0.232
	46	seed316607	400	0.43	150	0.226	10	0.206
	46	seed456078	200	0.108	140	0.499	25	0.452
	46	seed507291	650	0.014	190	0.313	20	0.497
	46	seed514247	300	0.104	90	0.054	45	0.34
	46	seed525684	300	0.312	170	0.474	20	0.439
	46	seed544969	450	0.341	140	0.05	45	0.498
	46	seed609274	550	0.305	120	0.271	30	0.161
	46	seed622299	400	0.253	140	0.14	50	0.448
	46	seed623378	650	0.313	190	0.067	20	0.169
	46	seed640308	250	0.37	190	0.234	45	0.276
	46	seed666079	600	0.07	80	0.347	35	0.306
	46	seed759645	250	0.166	150	0.129	15	0.187
	46	seed807321	200	0.355	80	0.41	10	0.306
	46	seed810579	350	0.406	90	0.224	50	0.369
	46	seed831322	600	0.004	150	0.149	40	0.301
	46	seed837284	200	0.397	140	0.343	40	0.037
	46	seed860912	300	0.245	70	0.368	50	0.087
	46	seed914634	550	0.168	200	0.168	30	0.305
	46	seed923422	200	0.006	140	0.244	10	0.208
	46	seed9496	350	0.139	120	0.078	35	0.225
	47	seed113704	400	0.254	170	0.2	30	0.201
	47	seed159043	450	0.442	180	0.18	50	0.008
	47	seed181091	350	0.35	50	0.5	35	0.106
	47	seed186720	350	0.34	70	0.174	50	0.251
	47	seed201241	650	0.426	60	0.29	30	0.094
	47	seed218795	250	0.249	110	0.43	35	0.361
	47	seed232222	700	0.088	200	0.394	15	0.357
	47	seed232549	450	0.221	170	0.4	45	0.343
	47	seed258801	650	0.246	140	0.284	10	0.071	0.427781	0.604645	0.501064
	47	seed265179	300	0.045	80	0.482	15	0.134
	47	seed266817	650	0.038	120	0.443	15	0.11
	47	seed282731	500	0.392	200	0.444	50	0.291
	47	seed292312	600	0.412	180	0.486	20	0.448
	47	seed302688	350	0.014	80	0.133	35	0.2
	47	seed304663	700	0.113	200	0.156	30	0.247	0.433143	0.592943	0.5006
	47	seed316607	650	0.257	180	0.316	10	0.459
	47	seed456078	350	0.268	200	0.138	40	0.227
	47	seed507291	300	0.022	180	0.33	50	0.367
	47	seed514247	450	0.204	170	0.161	20	0.233
	47	seed525684	750	0.244	70	0.014	30	0.292
	47	seed544969	300	0.137	70	0.251	40	0.169
	47	seed609274	300	0.113	150	0.189	20	0.335
	47	seed622299	350	0.035	80	0.343	15	0.286
	47	seed623378	450	0.347	190	0.434	15	0.191
	47	seed640308	600	0.482	120	0.14	20	0.409
	47	seed666079	500	0.231	190	0.067	30	0.485
	47	seed759645	450	0.166	50	0.129	50	0.305
	47	seed807321	500	0.086	170	0.139	35	0.274	0.406331	0.630604	0.494214
	47	seed810579	300	0.243	160	0.316	25	0.037
	47	seed831322	650	0.308	70	0.093	30	0.134
	47	seed837284	500	0.091	100	0.464	35	0.341
	47	seed860912	700	0.088	200	0.241	25	0.347
	47	seed914634	600	0.228	150	0.435	20	0.22
	47	seed923422	400	0.295	90	0.457	10	0.226
	47	seed9496	300	0.394	200	0.458	50	0.088
	48	seed113704	500	0.475	150	0.39	20	0.25
	48	seed159043	250	0.046	80	0.355	30	0.035
	48	seed181091	650	0.338	80	0.331	45	0.047
	48	seed186720	400	0.035	180	0.065	10	0.497
	48	seed201241	300	0.046	110	0.398	35	0.407
	48	seed218795	400	0.237	100	0.23	10	0.431
	48	seed232222	700	0.494	170	0.198	10	0.076
	48	seed232549	400	0.224	70	0.381	30	0.185
	48	seed258801	600	0.262	140	0.082	50	0.154
	48	seed265179	400	0.227	70	0.055	30	0.413
	48	seed266817	700	0.133	90	0.064	35	0.142
	48	seed282731	700	0.483	130	0.107	30	0.365
	48	seed292312	200	0.224	140	0.047	40	0.147
	48	seed302688	750	0.11	70	0.406	45	0.252
	48	seed304663	450	0.293	190	0.264	10	0.236
	48	seed316607	450	0.498	50	0.303	40	0.184
	48	seed456078	600	0.482	80	0.469	20	0.091
	48	seed507291	500	0.088	80	0.015	35	0.219
	48	seed514247	450	0.049	50	0.145	50	0.396
	48	seed525684	250	0.06	170	0.028	40	0.446
	48	seed544969	650	0.414	200	0.413	35	0.468
	48	seed609274	500	0.311	110	0.494	35	0.002
	48	seed622299	300	0.17	140	0.303	50	0.367
	48	seed623378	700	0.479	130	0.179	40	0.461
	48	seed640308	600	0.182	50	0.226	10	0.325
	48	seed666079	200	0.337	120	0.056	40	0.095
	48	seed759645	400	0.012	100	0.113	35	0.403
	48	seed807321	250	0.383	130	0.087	45	0.235
	48	seed810579	400	0.379	70	0.043	20	0.489
	48	seed831322	750	0.168	180	0.056	35	0.234
	48	seed837284	750	0.469	130	0.3	10	0.129
	48	seed860912	350	0.388	60	0.43	25	0.051
	48	seed914634	500	0.34	120	0.327	20	0.311
	48	seed923422	350	0.283	140	0.252	35	0.063	0.414634	0.608067	0.493058
	48	seed9496	350	0.268	50	0.463	50	0.022
	49	seed113704	300	0.319	80	0.48	45	0.224
	49	seed159043	200	0.07	130	0.164	15	0.014
	49	seed181091	250	0.061	70	0.436	20	0.236
	49	seed186720	650	0.198	190	0.193	25	0.162
	49	seed201241	550	0.357	110	0.23	20	0.105
	49	seed218795	500	0.016	170	0.252	40	0.021
	49	seed232222	650	0.061	150	0.181	50	0.042
	49	seed232549	550	0.112	130	0.16	40	0.453	0.395087	0.645928	0.490287
	49	seed258801	700	0.292	160	0.034	15	0.183
	49	seed265179	200	0.459	200	0.436	25	0.319
	49	seed266817	350	0.299	170	0.48	15	0.007
	49	seed282731	650	0.348	70	0.229	15	0.123
	49	seed292312	250	0.407	150	0.323	20	0.087
	49	seed302688	700	0.241	180	0.244	25	0.062
	49	seed304663	700	0.379	120	0.074	20	0.232
	49	seed316607	650	0.126	100	0.062	20	0.302
	49	seed456078	600	0.457	100	0.052	30	0.306
	49	seed507291	450	0.442	120	0.068	30	0.175	0.413077	0.631412	0.499425
	49	seed514247	400	0.272	130	0.254	15	0.247
	49	seed525684	350	0.205	190	0.022	20	0.19
	49	seed544969	200	0.34	170	0.37	15	0.335
	49	seed609274	200	0.108	60	0.287	45	0.164
	49	seed622299	350	0.481	170	0.305	50	0.292
	49	seed623378	450	0.195	180	0.01	25	0.486
	49	seed640308	300	0.328	170	0.057	35	0.318
	49	seed666079	700	0.32	120	0.178	40	0.234
	49	seed759645	200	0.414	70	0.423	20	0.118
	49	seed807321	500	0.235	200	0.113	50	0.263
	49	seed810579	450	0.43	70	0.001	20	0.268
	49	seed831322	700	0.144	60	0.286	40	0.077
	49	seed837284	450	0.123	130	0.445	30	0.404
	49	seed860912	500	0.246	110	0.2	10	0.219
	49	seed914634	650	0.241	170	0.163	30	0.322
	49	seed923422	500	0.054	120	0.395	20	0.332
	49	seed9496	300	0.08	190	0.161	45	0.226
	5	seed113704	450	0.185	50	0.483	45	0.259
	5	seed159043	250	0.006	90	0.32	20	0.289
	5	seed181091	700	0.46	200	0.14	20	0.459
	5	seed186720	550	0.115	100	0.147	25	0.01
	5	seed201241	600	0.367	140	0.324	45	0.41
	5	seed218795	750	0.294	190	0.373	20	0.399
	5	seed232222	400	0.282	120	0.041	50	0.495
	5	seed232549	250	0.247	60	0.303	15	0.192
	5	seed258801	250	0.246	70	0.217	50	0.247
	5	seed265179	450	0.327	60	0.148	30	0.196
	5	seed266817	550	0.451	140	0.412	10	0.112
	5	seed282731	550	0.39	180	0.428	15	0.071	0.410829	0.621077	0.494534
	5	seed286219	650	0.376	70	0.332	30	0.477
	5	seed292312	350	0.045	160	0.281	10	0.367
	5	seed302688	700	0.019	120	0.362	45	0.103
	5	seed304663	400	0.213	150	0.378	45	0.385
	5	seed316607	550	0.243	100	0.403	20	0.235
	5	seed39995	550	0.046	80	0.055	30	0.128
	5	seed456078	200	0.408	190	0.309	50	0.068
	5	seed45769	600	0.172	80	0.408	25	0.082
	5	seed507291	300	0.237	100	0.322	45	0.24
	5	seed514247	200	0.288	130	0.366	10	0.269
	5	seed525684	650	0.48	110	0.369	30	0.383
	5	seed544969	350	0.379	200	0.431	35	0.401
	5	seed609274	350	0.469	120	0.266	50	0.341
	5	seed622299	700	0.352	200	0.414	40	0.053
	5	seed623378	600	0.358	90	0.434	20	0.103
	5	seed640308	750	0.295	110	0.023	30	0.344
	5	seed666079	200	0.008	100	0.077	15	0.201
	5	seed693585	450	0.042	130	0.002	50	0.404
	5	seed759645	700	0.486	110	0.37	15	0.068
	5	seed807321	250	0.391	180	0.001	45	0.299
	5	seed810579	450	0.103	80	0.288	45	0.389
	5	seed831322	400	0.384	80	0.091	15	0.497
	5	seed837284	550	0.352	120	0.327	25	0.421
	5	seed860912	450	0.39	160	0.188	45	0.225
	5	seed914634	500	0.374	170	0.242	35	0.09
	5	seed923422	300	0.25	50	0.366	45	0.194
	5	seed9496	650	0.304	70	0.22	25	0.255
	5	seed992113	600	0.232	160	0.05	40	0.431
	50	seed113704	300	0.288	100	0.186	10	0.475	0.429683	0.577943	0.492906
	50	seed159043	200	0.017	120	0.275	30	0.24
	50	seed181091	350	0.179	120	0.018	40	0.112
	50	seed186720	200	0.435	150	0.223	15	0.014
	50	seed201241	300	0.283	130	0.181	30	0.451
	50	seed218795	300	0.488	200	0.117	50	0.107
	50	seed232222	700	0.202	80	0.151	35	0.327	0.435911	0.617344	0.511001
	50	seed232549	450	0.425	60	0.208	25	0.381
	50	seed258801	500	0.001	60	0.024	40	0.019
	50	seed265179	200	0.381	180	0.031	35	0.482
	50	seed266817	750	0.126	130	0.157	40	0.293
	50	seed282731	250	0.381	170	0.182	45	0.453	0.403736	0.635621	0.493811
	50	seed292312	500	0.218	110	0.316	40	0.439
	50	seed302688	700	0.103	50	0.255	45	0.266
	50	seed304663	250	0.259	90	0.267	20	0.209
	50	seed316607	500	0.135	70	0.409	50	0.165
	50	seed456078	450	0.286	170	0.481	50	0.412
	50	seed507291	650	0.102	170	0.205	40	0.087
	50	seed514247	200	0.439	80	0.155	50	0.395
	50	seed525684	750	0.089	60	0.14	25	0.44
	50	seed544969	200	0.114	100	0.047	35	0.257
	50	seed609274	500	0.371	110	0.342	15	0.031
	50	seed622299	750	0.101	140	0.108	20	0.134
	50	seed623378	700	0.245	170	0.239	20	0.201
	50	seed640308	650	0.159	160	0.131	25	0.425
	50	seed666079	550	0.248	130	0.067	10	0.246
	50	seed759645	200	0.374	130	0.237	25	0.136
	50	seed807321	400	0.403	150	0.332	15	0.368
	50	seed810579	500	0.402	80	0.043	40	0.202
	50	seed831322	650	0.342	160	0.288	20	0.129
	50	seed837284	550	0.335	170	0.066	10	0.435
	50	seed860912	300	0.248	180	0.388	45	0.31
	50	seed914634	300	0.08	180	0.041	20	0.296
	50	seed923422	200	0.374	150	0.354	15	0.348
	50	seed9496	300	0.337	190	0.362	50	0.359
	6	seed113704	200	0.015	70	0.177	40	0.228
	6	seed159043	550	0.014	80	0.059	35	0.302
	6	seed181091	650	0.431	150	0.236	25	0.345
	6	seed186720	600	0.14	80	0.163	45	0.366
	6	seed201241	650	0.414	140	0.158	50	0.318
	6	seed218795	700	0.035	180	0.4	30	0.006
	6	seed232222	550	0.439	110	0.067	30	0.239
	6	seed232549	350	0.211	140	0.248	40	0.054
	6	seed258801	250	0.085	180	0.05	10	0.039
	6	seed265179	450	0.122	120	0.219	40	0.404
	6	seed266817	250	0.089	180	0.166	25	0.227
	6	seed282731	200	0.226	150	0.001	35	0.119
	6	seed286219	350	0.38	120	0.32	50	0.06
	6	seed292312	600	0.457	120	0.15	35	0.354
	6	seed302688	750	0.209	90	0.12	10	0.215
	6	seed304663	350	0.416	100	0.494	50	0.25
	6	seed316607	650	0.015	50	0.389	50	0.185
	6	seed39995	600	0.051	50	0.323	20	0.436
	6	seed456078	450	0.238	200	0.392	10	0.431
	6	seed45769	450	0.266	50	0.065	45	0.056
	6	seed507291	200	0.462	180	0.151	30	0.159
	6	seed514247	600	0.437	190	0.112	25	0.223
	6	seed525684	350	0.199	180	0.25	50	0.134	0.411348	0.622025	0.49521
	6	seed544969	500	0.27	80	0.142	35	0.176
	6	seed609274	500	0.413	100	0.192	50	0.191	0.416883	0.607972	0.494613
	6	seed622299	450	0.303	70	0.229	25	0.44
	6	seed623378	750	0.478	70	0.249	25	0.176
	6	seed640308	400	0.166	170	0.082	25	0.352
	6	seed666079	500	0.204	180	0.281	15	0.088
	6	seed693585	250	0.444	180	0.484	20	0.088
	6	seed759645	550	0.259	140	0.18	30	0.288
	6	seed807321	650	0.128	70	0.208	15	0.425
	6	seed810579	250	0.347	180	0.491	40	0.033
	6	seed831322	750	0.36	130	0.222	15	0.332
	6	seed837284	500	0.054	70	0.33	45	0.368
	6	seed860912	650	0.17	150	0.396	30	0.317
	6	seed914634	300	0.247	50	0.224	35	0.005
	6	seed923422	650	0.315	120	0.327	35	0.349	0.417402	0.615247	0.497372
	6	seed9496	750	0.25	60	0.083	25	0.187
	6	seed992113	450	0.377	80	0.072	15	0.343
	7	seed113704	250	0.434	80	0.128	15	0.128
	7	seed159043	600	0.05	200	0.072	10	0.236
	7	seed181091	400	0.042	60	0.015	20	0.269
	7	seed186720	700	0.292	150	0.099	30	0.212
	7	seed201241	200	0.211	150	0.456	40	0.397
	7	seed218795	450	0.086	180	0.22	35	0.097
	7	seed232222	650	0.406	150	0.006	40	0.484
	7	seed232549	650	0.103	160	0.163	10	0.144
	7	seed258801	450	0.31	140	0.419	10	0.426
	7	seed265179	450	0.215	110	0.243	15	0.052
	7	seed266817	200	0.351	170	0.176	40	0.09
	7	seed282731	750	0.167	60	0.009	45	0.042
	7	seed286219	350	0.001	100	0.36	25	0.064
	7	seed292312	200	0.454	70	0.09	45	0.17
	7	seed302688	250	0.388	90	0.12	50	0.255
	7	seed304663	400	0.079	60	0.189	25	0.081
	7	seed316607	500	0.23	60	0.259	35	0.446
	7	seed39995	350	0.18	100	0.325	50	0.315
	7	seed456078	550	0.227	200	0.29	45	0.233
	7	seed45769	750	0.414	100	0.121	45	0.332
	7	seed507291	300	0.451	140	0.315	50	0.419
	7	seed514247	300	0.216	200	0.309	50	0.226
	7	seed525684	350	0.196	100	0.282	30	0.171
	7	seed544969	500	0.122	50	0.395	25	0.406
	7	seed609274	750	0.277	190	0.332	10	0.166
	7	seed622299	400	0.084	160	0.463	40	0.202
	7	seed623378	400	0.069	180	0.413	10	0.492
	7	seed640308	400	0.035	50	0.241	30	0.107
	7	seed666079	550	0.057	100	0.403	20	0.435
	7	seed693585	400	0.273	80	0.093	45	0.364
	7	seed759645	300	0.375	170	0.263	20	0.283
	7	seed807321	600	0.188	200	0.373	40	0.187
	7	seed810579	700	0.47	140	0.033	30	0.359
	7	seed831322	500	0.472	110	0.327	20	0.407
	7	seed837284	450	0.066	150	0.457	25	0.177
	7	seed860912	700	0.054	70	0.274	35	0.189
	7	seed914634	500	0.303	140	0.086	25	0.038	0.409618	0.652521	0.503294
	7	seed923422	500	0.15	80	0.314	25	0.122
	7	seed9496	450	0.266	70	0.402	20	0.178	0.424148	0.600539	0.497161
	7	seed992113	600	0.441	130	0.258	50	0.019
	8	seed113704	200	0.044	80	0.029	50	0.28
	8	seed159043	600	0.306	180	0.082	30	0.172
	8	seed181091	700	0.095	100	0.329	25	0.294
	8	seed186720	650	0.353	50	0.328	15	0.052
	8	seed201241	400	0.242	90	0.369	45	0.297
	8	seed218795	350	0.364	160	0.38	35	0.37
	8	seed232222	700	0.25	180	0.343	45	0.083
	8	seed232549	350	0.368	140	0.116	40	0.392
	8	seed258801	500	0.419	90	0.38	50	0.38
	8	seed265179	550	0.203	70	0.02	10	0.121
	8	seed266817	550	0.066	150	0.411	40	0.068
	8	seed282731	200	0.035	100	0.1	40	0.459
	8	seed286219	400	0.338	180	0.013	40	0.172
	8	seed292312	650	0.07	160	0.145	40	0.044
	8	seed302688	350	0.495	140	0	10	0.294
	8	seed304663	650	0.117	90	0.469	35	0.165
	8	seed316607	350	0.247	200	0.231	25	0.415
	8	seed39995	550	0.242	130	0.328	10	0.164
	8	seed456078	450	0.026	120	0.125	30	0.05
	8	seed45769	250	0.378	150	0.349	50	0.347
	8	seed507291	600	0.197	120	0.3	20	0.434
	8	seed514247	550	0.162	180	0.172	50	0.357
	8	seed525684	200	0.216	90	0.002	30	0.413
	8	seed544969	650	0.472	110	0.385	20	0.271
	8	seed609274	600	0.27	160	0.278	20	0.059
	8	seed622299	400	0.031	120	0.412	35	0.264
	8	seed623378	650	0.467	170	0.497	25	0.431
	8	seed640308	600	0.167	90	0.25	15	0.374
	8	seed666079	750	0.174	60	0.261	30	0.199
	8	seed693585	500	0.345	140	0.223	20	0.036
	8	seed759645	200	0.478	150	0.229	35	0.032
	8	seed807321	250	0.196	80	0.49	10	0.479
	8	seed810579	750	0.415	150	0.006	50	0.183	0.391628	0.661215	0.491907
	8	seed831322	300	0.084	200	0.401	45	0.143
	8	seed837284	400	0.487	100	0.418	10	0.321
	8	seed860912	650	0.093	140	0.48	15	0.479
	8	seed914634	300	0.123	120	0.413	15	0.036
	8	seed923422	550	0.25	200	0.209	10	0.192
	8	seed9496	200	0.452	150	0.063	45	0.236	0.404255	0.64168	0.49602
	8	seed992113	600	0.363	200	0.452	35	0.076
	9	seed113704	550	0.451	120	0.381	30	0.301
	9	seed159043	550	0.319	100	0.372	40	0.447
	9	seed181091	450	0.195	90	0.388	40	0.151
	9	seed186720	600	0.427	120	0.336	25	0.356
	9	seed201241	600	0.204	120	0.305	25	0.027
	9	seed218795	550	0.42	110	0.479	20	0.233
	9	seed232222	550	0.235	80	0.452	35	0.427
	9	seed232549	400	0.323	140	0.444	35	0.086
	9	seed258801	350	0.256	70	0.335	25	0.141
	9	seed265179	400	0.004	90	0.227	50	0.386
	9	seed266817	500	0.026	120	0.206	10	0.23
	9	seed282731	350	0.131	100	0.168	20	0.216
	9	seed286219	300	0.298	160	0.257	35	0.21
	9	seed292312	500	0.242	190	0.262	25	0.123
	9	seed302688	350	0.231	80	0.206	40	0.485
	9	seed304663	400	0.437	150	0.476	20	0.459
	9	seed316607	250	0.267	130	0.3	45	0.061
	9	seed39995	600	0.371	100	0.299	45	0.226
	9	seed456078	750	0.468	150	0.356	45	0.067
	9	seed45769	300	0.063	200	0.076	45	0.38
	9	seed507291	400	0.43	80	0.125	30	0.149
	9	seed514247	400	0.009	170	0.039	20	0.463
	9	seed525684	250	0.295	80	0.378	20	0.149
	9	seed544969	250	0.288	70	0.338	50	0.38
	9	seed609274	400	0.286	120	0.418	45	0.409
	9	seed622299	600	0.478	170	0.193	30	0.307
	9	seed623378	350	0.107	200	0.455	10	0.338
	9	seed640308	600	0.044	160	0.035	40	0.188
	9	seed666079	250	0.46	180	0.093	40	0.386
	9	seed693585	450	0.053	160	0.484	45	0.087
	9	seed759645	450	0.06	180	0.129	30	0.426
	9	seed807321	350	0.439	50	0.351	20	0.083
	9	seed810579	200	0.244	90	0.303	10	0.224
	9	seed831322	700	0.227	120	0.378	20	0.479
	9	seed837284	750	0.458	120	0.385	15	0.209
	9	seed860912	750	0.071	180	0.398	30	0.345
	9	seed914634	200	0.265	170	0.12	30	0.157
	9	seed923422	700	0.084	200	0.339	10	0.382
	9	seed9496	700	0.117	160	0.159	35	0.468
	9	seed992113	650	0.098	110	0.196	30	0.454

## Sheet: Table S2C 
	Table S2C. List of Parameters in Deep Learning
	Listed are neuron accounts and dropout parameters for deep learning models with integrated (protein abundance and interaction) features (highlighted in light blue lines are models with F1-measure > 0.66)
	Models	Seed	Layer I		Layer II		Layer III		Recall	Precision	F1-measure
			Neurons	Dropout	Neurons	Dropout	Neurons	Dropout
	1	seed113704	500	0.099	160	0.262	45	0.151
	1	seed159043	350	0.339	70	0.189	20	0.159
	1	seed159043	550	0.339	190	0.117	50	0.423
	1	seed181091	200	0.457	100	0.424	50	0.115
	1	seed186720	300	0.127	190	0.372	30	0.493
	1	seed201241	450	0.388	160	0.478	30	0.074
	1	seed218795	600	0.398	190	0.481	50	0.298
	1	seed232222	300	0.114	160	0.003	30	0.009
	1	seed232549	600	0.395	190	0.393	35	0.235
	1	seed258801	550	0.324	50	0.322	40	0.41
	1	seed265179	250	0.369	190	0.151	35	0.221
	1	seed266817	350	0.292	70	0.14	25	0.144
	1	seed282731	200	0.49	190	0.091	40	0.297
	1	seed286219	400	0.315	170	0.187	25	0.309
	1	seed292312	400	0.116	50	0.067	15	0.145
	1	seed292312	600	0.116	160	0.489	25	0.304
	1	seed302688	750	0.284	70	0.059	35	0.119
	1	seed304663	350	0.372	180	0.049	20	0.471
	1	seed316607	650	0.451	190	0.361	30	0.409	0.573084	0.796969	0.666734
	1	seed39995	200	0.248	150	0.081	45	0.177
	1	seed39995	750	0.248	180	0.329	30	0.06
	1	seed456078	350	0.458	200	0.113	15	0.211
	1	seed456078	450	0.458	60	0.408	35	0.22
	1	seed45769	400	0.062	170	0.132	50	0.263
	1	seed45769	650	0.062	50	0.182	35	0.392
	1	seed507291	250	0.063	190	0.217	15	0.486
	1	seed507291	650	0.063	110	0.357	35	0.449
	1	seed514247	400	0.022	120	0.287	40	0.366
	1	seed525684	400	0.237	170	0.393	35	0.054
	1	seed544969	650	0.222	100	0.368	25	0.001
	1	seed609274	350	0.255	160	0.109	50	0.282
	1	seed622299	750	0.201	170	0.049	25	0.146
	1	seed623378	300	0.032	180	0.342	15	0.286
	1	seed640308	750	0.24	90	0.002	30	0.18
	1	seed666079	550	0.384	50	0.194	40	0.211
	1	seed693585	450	0.325	180	0.056	15	0.119
	1	seed759645	650	0.079	120	0.441	50	0.426
	1	seed807321	700	0.232	60	0.011	15	0.059
	1	seed810579	350	0.026	160	0.188	15	0.356
	1	seed831322	650	0.006	70	0.059	50	0.122
	1	seed837284	500	0.483	120	0.172	20	0.456
	1	seed837284	650	0.483	90	0.456	10	0.077
	1	seed860912	350	0.19	190	0.163	10	0.044
	1	seed914634	700	0.36	150	0.072	35	0.003
	1	seed923422	400	0.253	150	0.274	35	0.132
	1	seed923422	700	0.253	100	0.133	50	0.306
	1	seed9496	450	0.106	60	0.043	10	0.476
	1	seed9496	700	0.106	100	0.03	35	0.06
	1	seed992113	250	0.258	50	0.497	45	0.277
	1	seed992113	300	0.258	110	0.45	30	0.259
	10	seed113704	400	0.36	70	0.029	10	0.129
	10	seed159043	600	0.147	130	0.365	20	0.087
	10	seed159043	700	0.147	100	0.046	10	0.023
	10	seed181091	200	0.403	200	0.09	20	0.232
	10	seed186720	450	0.299	50	0.148	25	0.103
	10	seed201241	550	0.155	140	0.051	35	0.402
	10	seed218795	400	0.482	80	0.053	10	0.246	0.568587	0.787683	0.660438
	10	seed232222	250	0.217	180	0.356	40	0.081
	10	seed232549	500	0.06	130	0.249	45	0.014
	10	seed258801	600	0.433	150	0.349	30	0.061
	10	seed265179	200	0.045	80	0.485	10	0.316	0.572046	0.797444	0.666197
	10	seed266817	700	0.241	190	0.236	30	0.177
	10	seed282731	350	0.291	110	0.156	45	0.399
	10	seed286219	600	0.221	190	0.368	15	0.121
	10	seed292312	400	0.166	110	0.27	50	0.426
	10	seed292312	650	0.166	150	0.224	30	0.448
	10	seed302688	550	0.464	80	0.031	25	0.218
	10	seed304663	700	0.422	160	0.357	35	0.118
	10	seed316607	650	0.464	100	0.396	20	0.29
	10	seed39995	500	0.17	160	0.175	30	0.26
	10	seed39995	700	0.17	170	0.228	40	0.485	0.57516	0.79698	0.66814
	10	seed456078	550	0.18	90	0.25	40	0.169
	10	seed456078	700	0.18	90	0.096	35	0.374
	10	seed45769	500	0.454	50	0.283	25	0.351	0.58156	0.792364	0.67079
	10	seed45769	750	0.454	60	0.43	20	0.261
	10	seed507291	600	0.207	80	0.49	25	0.432
	10	seed507291	700	0.207	90	0.088	45	0.208
	10	seed514247	700	0.179	130	0.201	25	0.303
	10	seed525684	450	0.433	80	0.043	35	0.104
	10	seed544969	450	0.408	190	0.453	25	0.357
	10	seed609274	200	0.084	140	0.318	15	0.454
	10	seed622299	400	0.418	90	0.418	35	0.225
	10	seed623378	450	0.318	100	0.037	35	0.426
	10	seed640308	200	0.117	200	0.014	15	0.356
	10	seed666079	600	0.092	180	0.275	40	0.031
	10	seed693585	350	0.29	120	0.214	45	0.476
	10	seed759645	750	0.189	110	0.371	25	0.27
	10	seed807321	400	0.128	200	0.245	50	0.278
	10	seed810579	700	0.059	90	0.474	45	0.019
	10	seed831322	250	0.136	150	0.458	20	0.373
	10	seed837284	300	0.105	60	0.143	30	0.104
	10	seed837284	350	0.105	60	0.469	35	0.2
	10	seed860912	700	0.135	160	0.162	35	0.474
	10	seed914634	650	0.375	70	0.426	20	0.301
	10	seed923422	250	0.193	200	0.171	15	0.114
	10	seed923422	750	0.193	190	0.181	30	0.252
	10	seed9496	400	0.208	180	0.466	10	0.26
	10	seed9496	400	0.208	80	0.364	15	0.465
	10	seed992113	550	0.292	170	0.081	15	0.152
	10	seed992113	650	0.292	100	0.052	15	0.211
	11	seed113704	600	0.246	140	0.251	25	0.461
	11	seed159043	250	0.351	200	0.227	40	0.287
	11	seed159043	650	0.351	150	0.07	50	0.444
	11	seed181091	650	0.21	170	0.145	45	0.126
	11	seed186720	300	0.355	140	0.416	45	0.25
	11	seed201241	600	0.421	120	0.314	10	0.021
	11	seed218795	650	0.213	120	0.098	10	0.156
	11	seed232222	300	0.485	200	0.071	35	0.061
	11	seed232549	200	0.449	150	0.166	20	0.392
	11	seed258801	350	0.034	50	0.345	25	0.359
	11	seed265179	300	0.27	190	0.3	40	0.062
	11	seed266817	750	0.301	120	0.046	35	0.203
	11	seed282731	600	0.117	80	0.362	20	0.186
	11	seed286219	500	0.359	160	0.297	20	0.113
	11	seed292312	400	0.054	90	0.371	15	0.165
	11	seed292312	650	0.054	200	0.407	10	0.386
	11	seed302688	750	0.45	150	0.22	35	0.205
	11	seed304663	750	0.485	110	0.441	35	0.271
	11	seed316607	650	0.117	100	0.315	20	0.11
	11	seed39995	250	0.241	60	0.329	10	0.428
	11	seed39995	550	0.241	60	0.136	45	0.021
	11	seed456078	300	0.488	70	0.347	30	0.373
	11	seed456078	450	0.488	110	0.077	15	0.408
	11	seed45769	200	0.412	140	0.347	20	0.345
	11	seed45769	200	0.412	190	0.344	35	0.142
	11	seed507291	250	0.455	100	0.222	35	0.09
	11	seed507291	300	0.455	180	0.442	25	0.388
	11	seed514247	300	0.169	110	0.238	35	0.446
	11	seed525684	300	0.104	170	0.243	35	0.017
	11	seed544969	350	0.052	150	0.361	35	0.435
	11	seed609274	600	0.07	50	0.284	10	0.318
	11	seed622299	550	0.371	170	0.435	15	0.482
	11	seed623378	400	0.178	60	0.27	35	0.246	0.567549	0.792895	0.661559
	11	seed640308	200	0.424	90	0.086	20	0.38	0.559592	0.809155	0.661622
	11	seed666079	600	0.326	90	0.138	20	0.472
	11	seed693585	650	0.372	120	0.023	10	0.298
	11	seed759645	300	0.268	50	0.097	30	0.16
	11	seed807321	250	0.27	50	0.342	10	0.066
	11	seed810579	250	0.194	170	0.176	50	0.257
	11	seed831322	200	0.302	90	0.387	20	0.183
	11	seed837284	500	0.372	70	0.123	20	0.458
	11	seed837284	750	0.372	140	0.151	15	0.351
	11	seed860912	300	0.155	70	0.397	40	0.321
	11	seed914634	700	0.326	140	0.384	25	0.331
	11	seed923422	250	0.127	50	0.15	20	0.078
	11	seed923422	300	0.127	190	0.366	35	0.395
	11	seed9496	400	0.174	80	0.287	25	0.468
	11	seed9496	550	0.174	100	0.059	35	0.441
	11	seed992113	200	0.003	120	0.485	25	0.4
	11	seed992113	550	0.003	130	0.007	20	0.347
	12	seed113704	700	0.38	200	0.23	30	0.332
	12	seed159043	400	0.223	170	0.363	50	0.424
	12	seed159043	600	0.223	150	0.017	25	0.277
	12	seed181091	300	0.216	150	0.269	15	0.388
	12	seed186720	500	0.473	80	0.363	45	0.422
	12	seed201241	250	0.341	130	0.095	45	0.453
	12	seed218795	250	0.34	120	0.303	35	0.446
	12	seed232222	650	0.276	160	0.431	35	0.428
	12	seed232549	250	0.289	170	0.317	40	0.401
	12	seed258801	500	0.178	160	0.099	45	0.307
	12	seed265179	750	0.332	70	0.195	10	0.253
	12	seed266817	450	0.437	140	0.061	45	0.148
	12	seed282731	650	0.43	160	0.4	20	0.259
	12	seed286219	250	0.469	160	0.003	50	0.059
	12	seed292312	550	0.359	80	0.05	35	0.03	0.564089	0.803994	0.663007
	12	seed292312	750	0.359	110	0.218	10	0.131
	12	seed302688	250	0.363	130	0.189	25	0.454
	12	seed304663	600	0.215	90	0.379	10	0.234
	12	seed316607	250	0.41	170	0.146	25	0.315
	12	seed39995	500	0.346	50	0.489	45	0.158
	12	seed39995	700	0.346	180	0.111	20	0.246
	12	seed456078	250	0.364	140	0.349	25	0.433
	12	seed456078	400	0.364	120	0.314	25	0.03
	12	seed45769	200	0.276	190	0.408	20	0.057
	12	seed45769	200	0.276	80	0.122	30	0.382
	12	seed507291	350	0.422	60	0.467	10	0.211
	12	seed507291	450	0.422	100	0.102	30	0.438
	12	seed514247	200	0.23	130	0.171	20	0.434
	12	seed525684	400	0.194	130	0.224	45	0.451
	12	seed544969	650	0.488	190	0.182	15	0.166
	12	seed609274	200	0	110	0.256	15	0.198
	12	seed622299	400	0.132	130	0.468	45	0.233
	12	seed623378	600	0.099	120	0.348	10	0.393
	12	seed640308	350	0.151	130	0.349	25	0.36	0.581733	0.768159	0.662073
	12	seed666079	600	0.305	140	0.47	40	0.396
	12	seed693585	500	0.01	70	0.115	45	0.456
	12	seed759645	450	0.016	180	0.453	40	0.337
	12	seed807321	650	0.263	140	0.009	40	0.159
	12	seed810579	700	0.072	50	0.273	20	0.307
	12	seed831322	500	0.05	190	0.157	35	0.352
	12	seed837284	250	0.258	50	0.213	40	0.239
	12	seed837284	600	0.258	190	0.335	10	0.06
	12	seed860912	700	0.19	200	0.057	45	0.415
	12	seed914634	450	0.031	70	0.364	50	0.24
	12	seed923422	450	0.337	140	0.327	50	0.354
	12	seed923422	550	0.337	50	0.342	35	0.037
	12	seed9496	300	0.41	90	0.233	45	0.211
	12	seed9496	450	0.41	90	0.248	10	0.08
	12	seed992113	200	0.007	110	0.28	15	0.314
	12	seed992113	650	0.007	150	0.346	30	0.49
	13	seed113704	650	0.218	60	0.238	50	0.352
	13	seed159043	550	0.214	170	0.231	15	0.256
	13	seed159043	650	0.214	200	0.117	40	0.351
	13	seed181091	250	0.221	80	0.486	40	0.141
	13	seed186720	700	0.494	160	0.339	15	0.264
	13	seed201241	600	0.257	190	0.042	35	0.289
	13	seed218795	500	0.212	50	0.251	15	0.343
	13	seed232222	750	0.484	120	0.155	10	0.395
	13	seed232549	650	0.018	140	0.435	10	0.158
	13	seed258801	550	0.382	110	0.094	40	0.24
	13	seed265179	500	0.205	90	0.176	35	0.074
	13	seed266817	200	0.063	160	0.464	35	0.066
	13	seed282731	550	0.1	70	0.42	25	0.364
	13	seed286219	500	0.139	130	0.422	25	0.349
	13	seed292312	650	0.495	70	0.067	35	0.326
	13	seed292312	750	0.495	160	0.251	50	0.075
	13	seed302688	550	0.142	200	0.007	50	0.456
	13	seed304663	600	0.492	70	0.11	50	0.282
	13	seed316607	350	0.397	190	0.278	45	0.213	0.571354	0.787741	0.662322
	13	seed39995	500	0.004	140	0.315	10	0.285
	13	seed39995	500	0.004	60	0.329	35	0.112
	13	seed456078	250	0.449	60	0.475	45	0.294
	13	seed456078	550	0.449	60	0.214	30	0.491
	13	seed45769	300	0.206	170	0.065	35	0.037
	13	seed45769	700	0.206	140	0.004	35	0.122
	13	seed507291	400	0.271	80	0.357	40	0.286
	13	seed507291	650	0.271	120	0.216	35	0.188
	13	seed514247	600	0.011	160	0.316	25	0.39
	13	seed525684	400	0.046	100	0.463	45	0.028
	13	seed544969	250	0.072	70	0.18	10	0.292
	13	seed609274	600	0.156	150	0.364	20	0.44
	13	seed622299	550	0.357	150	0.318	15	0.298
	13	seed623378	450	0.474	60	0.401	45	0.257
	13	seed640308	550	0.044	190	0.231	35	0.497
	13	seed666079	400	0.307	60	0.467	10	0.272
	13	seed693585	750	0.311	160	0.088	50	0.241
	13	seed759645	550	0.041	190	0.265	25	0.118
	13	seed807321	600	0.371	180	0.355	20	0.247
	13	seed810579	350	0.23	160	0.401	10	0.272
	13	seed831322	300	0.155	170	0.114	10	0.353
	13	seed837284	250	0.14	130	0.456	20	0.435
	13	seed837284	250	0.14	150	0.081	35	0.487
	13	seed860912	650	0.142	50	0.474	25	0.344
	13	seed914634	200	0.04	160	0.189	40	0.159
	13	seed923422	350	0.428	180	0.246	50	0.482
	13	seed923422	450	0.428	70	0.314	45	0.132
	13	seed9496	200	0.071	120	0.05	35	0.218
	13	seed9496	750	0.071	160	0.379	40	0.246
	13	seed992113	450	0.334	130	0.176	25	0.037
	13	seed992113	700	0.334	70	0.45	20	0.008
	14	seed113704	700	0.305	80	0.031	30	0.446
	14	seed159043	550	0.364	60	0.076	50	0.05
	14	seed159043	700	0.364	120	0.263	35	0.009
	14	seed181091	300	0.038	160	0.07	10	0.354
	14	seed186720	650	0.126	70	0.401	15	0.384
	14	seed201241	250	0.33	110	0.352	10	0.449
	14	seed218795	450	0.014	120	0.07	50	0.049
	14	seed232222	650	0.281	50	0.134	15	0.129
	14	seed232549	750	0.144	170	0.235	40	0.118
	14	seed258801	600	0.42	130	0.111	20	0.245
	14	seed265179	700	0.19	80	0.229	20	0.273
	14	seed266817	350	0.274	80	0.117	35	0.108
	14	seed282731	700	0.257	50	0.143	30	0.034
	14	seed286219	750	0.187	70	0.03	15	0.18
	14	seed292312	450	0.36	170	0.03	45	0.134
	14	seed292312	750	0.36	50	0.139	45	0.008
	14	seed302688	400	0.003	110	0.237	25	0.437
	14	seed304663	450	0.298	80	0.008	25	0.313
	14	seed316607	450	0.343	190	0.185	50	0.427
	14	seed39995	250	0.244	150	0.293	20	0.063
	14	seed39995	500	0.244	140	0.212	35	0.485
	14	seed456078	400	0.153	120	0.108	50	0.226
	14	seed456078	550	0.153	70	0.367	15	0.28
	14	seed45769	300	0.313	180	0.461	20	0.273
	14	seed45769	400	0.313	60	0.121	20	0.018
	14	seed507291	400	0.073	120	0.459	15	0.275
	14	seed507291	400	0.073	60	0.257	25	0.265
	14	seed514247	300	0.347	90	0.107	40	0.214
	14	seed525684	750	0.474	90	0.462	30	0.488
	14	seed544969	500	0.408	150	0.235	15	0.07
	14	seed609274	550	0.454	200	0.461	10	0.169
	14	seed622299	600	0.063	80	0.278	35	0.244
	14	seed623378	450	0.484	110	0.406	25	0.167
	14	seed640308	650	0.288	110	0.065	35	0.308
	14	seed666079	750	0.227	70	0.092	25	0.432
	14	seed693585	400	0.448	170	0.023	30	0.442
	14	seed759645	400	0.054	60	0.315	20	0.114
	14	seed807321	450	0.026	150	0.422	10	0.065
	14	seed810579	500	0.085	160	0.213	25	0.114
	14	seed831322	400	0.141	80	0.223	20	0.032
	14	seed837284	550	0.016	200	0.179	10	0.472
	14	seed837284	750	0.016	70	0.456	45	0.305
	14	seed860912	550	0.202	200	0.432	40	0.44
	14	seed914634	300	0.445	90	0.378	20	0.481
	14	seed923422	200	0.199	140	0.358	30	0.351
	14	seed923422	400	0.199	120	0.209	25	0.299
	14	seed9496	250	0.091	90	0.042	15	0.094
	14	seed9496	750	0.091	130	0.139	35	0.419
	14	seed992113	450	0.462	150	0.446	25	0.492
	14	seed992113	450	0.462	160	0.463	35	0.247
	15	seed113704	250	0.185	140	0.386	15	0.297
	15	seed159043	450	0.379	180	0.157	20	0.12
	15	seed159043	750	0.379	60	0.495	10	0.161
	15	seed181091	600	0.353	170	0.309	35	0.374
	15	seed186720	350	0.148	50	0.285	15	0.018
	15	seed201241	350	0.065	140	0.034	25	0.446
	15	seed218795	750	0.238	180	0.452	40	0.167
	15	seed232222	400	0.175	130	0.001	10	0.044
	15	seed232549	400	0.454	100	0.485	25	0.368
	15	seed258801	400	0.453	60	0.175	30	0.334
	15	seed265179	700	0.113	50	0.091	10	0.242
	15	seed266817	550	0.326	180	0.327	15	0.421
	15	seed282731	400	0.379	170	0.201	45	0.464
	15	seed286219	500	0.277	140	0.494	20	0.141
	15	seed292312	250	0.318	190	0.166	10	0.366
	15	seed292312	250	0.318	190	0.424	40	0.391
	15	seed302688	750	0.264	90	0.162	20	0.442
	15	seed304663	200	0.141	90	0.037	10	0.119
	15	seed316607	450	0.154	70	0.149	10	0.399
	15	seed39995	200	0.373	190	0.055	15	0.452
	15	seed39995	300	0.373	70	0.243	15	0.383
	15	seed456078	600	0.32	160	0.268	10	0.069
	15	seed456078	600	0.32	70	0.211	45	0.168
	15	seed45769	300	0.292	200	0.349	15	0.263	0.573949	0.782916	0.662342
	15	seed45769	700	0.292	180	0.024	35	0.026
	15	seed507291	300	0.445	180	0.18	20	0.057
	15	seed507291	500	0.445	160	0.45	20	0.475
	15	seed514247	550	0.32	120	0.45	15	0.304
	15	seed525684	700	0.096	200	0.463	50	0.045
	15	seed544969	200	0.077	130	0.297	25	0.026
	15	seed609274	450	0.05	190	0.413	45	0.25
	15	seed622299	650	0.238	170	0.164	25	0.106
	15	seed640308	450	0.019	130	0.275	50	0.039
	15	seed666079	650	0.475	70	0.179	10	0.002
	15	seed693585	400	0.314	50	0.063	40	0.002
	15	seed759645	200	0.366	90	0.456	40	0.221
	15	seed807321	600	0.224	120	0.145	10	0.295
	15	seed810579	450	0.233	130	0.218	25	0.083
	15	seed831322	700	0.065	60	0.105	40	0.362
	15	seed837284	500	0.052	130	0.209	25	0.482
	15	seed837284	500	0.052	50	0.425	10	0.274
	15	seed860912	650	0.188	70	0.282	15	0.063
	15	seed914634	450	0.416	80	0.259	45	0.075
	15	seed923422	350	0.134	80	0.387	45	0.495
	15	seed923422	450	0.134	70	0.339	25	0.489
	15	seed9496	700	0.091	150	0.06	40	0.151
	15	seed9496	700	0.091	80	0.394	50	0.16
	15	seed992113	250	0.08	160	0.279	40	0.053
	15	seed992113	300	0.08	100	0.374	15	0.042
	16	seed113704	700	0.325	80	0.101	35	0.157
	16	seed159043	450	0.313	140	0.456	30	0.291
	16	seed159043	500	0.313	60	0.054	15	0.469
	16	seed181091	200	0.236	60	0.25	35	0.319
	16	seed186720	450	0.49	60	0.285	10	0.078
	16	seed201241	700	0.373	90	0.19	20	0.239
	16	seed218795	500	0.376	80	0.155	25	0.154
	16	seed232222	200	0.005	180	0.166	45	0.019
	16	seed232549	550	0.476	170	0.46	35	0.398
	16	seed258801	700	0.343	170	0.289	35	0.354
	16	seed265179	550	0.318	70	0.431	45	0.131
	16	seed266817	550	0.34	190	0.486	20	0.202
	16	seed282731	200	0.177	180	0.035	25	0.162
	16	seed286219	600	0.163	100	0.138	10	0.195
	16	seed292312	200	0.303	120	0.345	40	0.368
	16	seed292312	300	0.303	190	0.393	30	0.064
	16	seed302688	600	0.362	190	0.37	30	0.224
	16	seed304663	500	0.41	60	0.349	10	0.215
	16	seed316607	750	0.309	160	0.053	45	0.335	0.57689	0.787114	0.665802
	16	seed39995	350	0.262	170	0.09	15	0.196
	16	seed39995	450	0.262	90	0.323	45	0.476
	16	seed456078	200	0.308	170	0.482	20	0.045
	16	seed456078	400	0.308	70	0.305	20	0.175
	16	seed45769	250	0.465	180	0.076	35	0.38	0.577236	0.787957	0.666334
	16	seed45769	550	0.465	150	0.03	10	0.442
	16	seed507291	300	0.466	70	0.171	45	0.001	0.57049	0.784678	0.660657
	16	seed507291	450	0.466	160	0.072	30	0.477
	16	seed514247	600	0.417	170	0.201	20	0.369
	16	seed525684	450	0.276	120	0.012	30	0.102
	16	seed544969	400	0.034	200	0.243	10	0.297
	16	seed609274	250	0.034	160	0.358	15	0.411
	16	seed622299	400	0.476	90	0.497	25	0.129
	16	seed640308	200	0.471	140	0.23	20	0.089
	16	seed666079	700	0.102	100	0.475	10	0.233
	16	seed693585	550	0.477	110	0.18	25	0.385
	16	seed759645	350	0.374	50	0.339	45	0.32
	16	seed807321	550	0.332	140	0.155	25	0.451
	16	seed810579	650	0.478	180	0.019	35	0.284
	16	seed831322	650	0.017	50	0.108	20	0.273
	16	seed837284	650	0.187	110	0.41	15	0.072
	16	seed837284	750	0.187	180	0.473	15	0.267
	16	seed860912	450	0.352	150	0.187	10	0.247
	16	seed914634	550	0.254	130	0.184	10	0.342
	16	seed923422	250	0.402	160	0.405	45	0.444
	16	seed923422	250	0.402	170	0.171	15	0.282
	16	seed9496	450	0.465	110	0.268	40	0.039
	16	seed9496	600	0.465	130	0.303	40	0.301
	16	seed992113	600	0.225	190	0.118	10	0.111
	16	seed992113	650	0.225	150	0.368	20	0.272
	17	seed113704	650	0.037	180	0.426	15	0.322
	17	seed159043	550	0.225	110	0.32	50	0.083
	17	seed159043	650	0.225	160	0.16	30	0.385
	17	seed181091	700	0.469	130	0.063	40	0.069
	17	seed186720	600	0.15	150	0.168	25	0.392
	17	seed201241	200	0.094	60	0.179	50	0.497
	17	seed218795	200	0.438	120	0.432	45	0.334
	17	seed232222	250	0.41	60	0.149	40	0.448
	17	seed232549	650	0.395	80	0.311	35	0.074
	17	seed258801	600	0.07	120	0.043	20	0.356
	17	seed265179	500	0.486	170	0.454	25	0.459
	17	seed266817	450	0.445	110	0.267	40	0.019
	17	seed282731	700	0.429	50	0.142	10	0.396
	17	seed286219	550	0.236	120	0.076	20	0.153
	17	seed292312	250	0.337	200	0.281	15	0.285
	17	seed292312	700	0.337	150	0.479	45	0.343
	17	seed302688	700	0.115	70	0.348	30	0.41
	17	seed304663	300	0.001	140	0.475	20	0.006
	17	seed316607	550	0.347	110	0.194	50	0.421
	17	seed39995	600	0.409	200	0.325	50	0.255
	17	seed39995	650	0.409	190	0.047	45	0.492
	17	seed456078	650	0.492	190	0.483	25	0.272	0.569625	0.80929	0.668629
	17	seed456078	750	0.492	80	0.457	50	0.254
	17	seed45769	550	0.102	150	0.283	35	0.348
	17	seed45769	750	0.102	90	0.294	35	0.055
	17	seed507291	500	0.419	70	0.322	35	0.355
	17	seed507291	600	0.419	130	0.094	10	0.493
	17	seed514247	200	0.418	130	0.25	20	0.181
	17	seed525684	600	0.414	200	0.299	45	0.006	0.556305	0.817696	0.662137
	17	seed544969	300	0.124	180	0.072	50	0.464
	17	seed609274	650	0.442	140	0.353	25	0.209
	17	seed622299	550	0.172	100	0.268	15	0.325
	17	seed640308	250	0.284	200	0.328	10	0.059
	17	seed666079	300	0.44	160	0.103	30	0.084
	17	seed693585	450	0.309	160	0.249	35	0.396
	17	seed759645	700	0.398	200	0.049	15	0.382
	17	seed807321	250	0.088	120	0.093	25	0.189
	17	seed810579	700	0.215	110	0.102	35	0.021
	17	seed831322	300	0.291	70	0.16	25	0.307
	17	seed837284	450	0.484	60	0.327	35	0.435
	17	seed837284	500	0.484	150	0.048	40	0.345
	17	seed860912	250	0.219	70	0.166	25	0.252
	17	seed914634	200	0.296	100	0.13	20	0.073
	17	seed923422	550	0.244	70	0.15	40	0.194
	17	seed923422	750	0.244	100	0.201	20	0.436
	17	seed9496	450	0.362	200	0.08	25	0.31
	17	seed9496	500	0.362	110	0.131	40	0.217
	17	seed992113	400	0.048	130	0.05	30	0.252
	17	seed992113	600	0.048	180	0.061	45	0.317
	18	seed113704	650	0.034	170	0.036	10	0.349
	18	seed159043	200	0.401	120	0.059	45	0.402
	18	seed159043	250	0.401	190	0.107	45	0.159
	18	seed181091	500	0.047	60	0.265	25	0.009
	18	seed186720	350	0.438	140	0.214	25	0.037	0.582598	0.803052	0.675288
	18	seed201241	250	0.064	170	0.071	50	0.279
	18	seed218795	400	0.436	150	0.471	20	0.45
	18	seed232222	450	0.335	50	0.451	30	0.363
	18	seed232549	650	0.221	90	0.356	30	0.005
	18	seed258801	500	0.21	60	0.349	35	0.421
	18	seed265179	650	0.266	200	0.208	40	0.316
	18	seed266817	200	0.068	90	0.493	10	0.306
	18	seed282731	550	0.29	180	0.284	35	0.164
	18	seed286219	450	0.488	170	0.318	10	0.128
	18	seed292312	450	0.114	150	0.15	40	0.092
	18	seed292312	700	0.114	190	0.134	50	0.327
	18	seed302688	250	0.037	50	0.097	45	0.331
	18	seed304663	250	0.337	200	0.126	45	0.404
	18	seed316607	500	0.216	140	0.124	40	0.341
	18	seed39995	350	0.37	90	0.401	40	0.172
	18	seed39995	600	0.37	70	0.328	20	0.04
	18	seed456078	300	0.447	60	0.038	20	0.326
	18	seed456078	500	0.447	190	0.286	45	0.006
	18	seed45769	250	0.173	120	0.165	30	0.037
	18	seed45769	650	0.173	150	0.344	45	0.115
	18	seed507291	200	0.484	170	0.151	25	0.38
	18	seed507291	250	0.484	100	0.214	35	0.498
	18	seed514247	200	0.449	200	0.232	25	0.379
	18	seed525684	550	0.156	110	0.294	30	0.188
	18	seed544969	650	0.271	120	0.13	40	0.489
	18	seed609274	600	0.321	120	0.243	25	0.325
	18	seed622299	750	0.472	170	0.304	30	0.371
	18	seed640308	600	0.112	140	0.423	45	0.253
	18	seed666079	250	0.031	130	0.422	10	0.29
	18	seed693585	400	0.321	50	0.274	40	0.322
	18	seed759645	300	0.272	100	0.332	50	0.156
	18	seed807321	450	0.105	170	0.378	25	0.252
	18	seed810579	450	0.403	80	0.212	45	0.429
	18	seed831322	600	0.418	90	0.128	15	0.449
	18	seed837284	400	0.211	130	0.023	35	0.438
	18	seed837284	500	0.211	70	0.33	20	0.363
	18	seed860912	400	0.45	60	0.058	20	0.345
	18	seed914634	550	0.112	190	0.341	10	0.349
	18	seed923422	250	0.397	170	0.142	40	0.137
	18	seed923422	600	0.397	110	0.342	30	0.349	0.569452	0.791917	0.662508
	18	seed9496	300	0.084	120	0.337	40	0.419
	18	seed9496	500	0.084	170	0.264	25	0.493
	18	seed992113	350	0.177	130	0.072	50	0.048
	18	seed992113	550	0.177	200	0.285	40	0.184
	19	seed113704	200	0.319	170	0.307	45	0.34
	19	seed159043	350	0.153	130	0.072	20	0.064
	19	seed159043	450	0.153	100	0.268	30	0.449
	19	seed181091	550	0.167	200	0.352	15	0.223
	19	seed186720	550	0.045	130	0.197	35	0.074
	19	seed201241	400	0.167	60	0.286	40	0.348
	19	seed218795	500	0.351	160	0.17	10	0.401
	19	seed232222	500	0.193	100	0.222	30	0.2
	19	seed232549	450	0.389	60	0.231	10	0.262
	19	seed258801	750	0.103	130	0.374	25	0.176
	19	seed265179	200	0.244	130	0.392	45	0.244
	19	seed266817	600	0.216	80	0.408	50	0.419
	19	seed282731	600	0.173	200	0.06	15	0.158
	19	seed286219	200	0.238	110	0.492	25	0.206
	19	seed292312	600	0.351	90	0.09	50	0.032
	19	seed292312	750	0.351	70	0.094	50	0.444
	19	seed302688	650	0.167	90	0.193	20	0.007
	19	seed304663	700	0.051	80	0.058	40	0.08
	19	seed316607	750	0.182	110	0.453	45	0.062
	19	seed39995	750	0.04	150	0.122	15	0.173
	19	seed39995	750	0.04	80	0.299	35	0.247
	19	seed456078	400	0.472	120	0.408	20	0.203
	19	seed456078	750	0.472	200	0.426	45	0.483
	19	seed45769	250	0.172	170	0.41	50	0.487
	19	seed45769	650	0.172	110	0.122	35	0.082
	19	seed507291	250	0.31	150	0.258	50	0.144	0.56703	0.79217	0.660954
	19	seed507291	650	0.31	140	0.315	20	0.083
	19	seed514247	350	0.006	50	0.354	15	0.309
	19	seed525684	200	0.271	160	0.173	25	0.244
	19	seed544969	550	0.143	70	0.06	50	0.291
	19	seed609274	650	0.338	190	0.387	10	0.492
	19	seed622299	450	0	110	0.439	50	0.404
	19	seed640308	600	0.165	190	0.236	35	0.199
	19	seed666079	300	0.41	130	0.383	50	0.096
	19	seed693585	350	0.448	60	0.177	45	0.164
	19	seed759645	200	0.176	110	0.32	15	0.367
	19	seed807321	350	0.391	110	0.184	40	0.38
	19	seed810579	400	0.01	110	0.414	15	0.204
	19	seed831322	700	0.14	120	0.258	10	0.393
	19	seed837284	200	0.369	140	0.057	10	0.308	0.564781	0.798484	0.661601
	19	seed837284	700	0.369	140	0.457	30	0.07
	19	seed860912	550	0.192	160	0.123	10	0.2
	19	seed914634	250	0.203	90	0.061	35	0.355
	19	seed923422	400	0.125	170	0.246	50	0.122
	19	seed923422	500	0.125	100	0.362	45	0.064
	19	seed9496	350	0.366	70	0.043	50	0.033
	19	seed9496	400	0.366	140	0.228	35	0.065
	19	seed992113	300	0.444	80	0.258	25	0.486
	19	seed992113	500	0.444	60	0.481	30	0.16
	2	seed113704	350	0.202	60	0.389	50	0.268
	2	seed159043	450	0.255	110	0.263	50	0.327
	2	seed159043	500	0.255	160	0.036	30	0.352
	2	seed181091	300	0.22	100	0.246	20	0.082
	2	seed186720	500	0.46	80	0.496	50	0.019
	2	seed201241	200	0.036	130	0.192	25	0.137
	2	seed218795	250	0.457	60	0.132	35	0.144
	2	seed232222	600	0.21	200	0.483	40	0.021
	2	seed232549	450	0.185	70	0.381	40	0.34
	2	seed258801	450	0.174	90	0.252	35	0.309
	2	seed265179	600	0.267	140	0.445	40	0.353
	2	seed266817	250	0.354	100	0.389	10	0.274
	2	seed282731	600	0.177	110	0.348	20	0.004	0.560803	0.788424	0.655413
	2	seed286219	350	0.133	120	0.467	30	0.431
	2	seed292312	400	0.182	50	0.139	30	0.245
	2	seed292312	600	0.182	160	0.455	25	0.255
	2	seed302688	250	0.402	100	0.081	40	0.442
	2	seed304663	200	0.159	200	0.204	35	0.099
	2	seed316607	550	0.017	80	0.129	15	0.241
	2	seed39995	300	0.468	200	0.489	20	0.302
	2	seed39995	450	0.468	180	0.471	50	0.024
	2	seed456078	750	0.31	110	0.477	30	0.223
	2	seed456078	750	0.31	80	0.179	25	0.305
	2	seed45769	550	0.468	190	0.142	50	0.38	0.55717	0.808484	0.659703
	2	seed45769	750	0.468	120	0.11	20	0.498
	2	seed507291	250	0.218	120	0.459	35	0.213	0.571181	0.75943	0.651989
	2	seed507291	750	0.218	180	0.161	40	0.028	0.56063	0.793002	0.656871
	2	seed514247	300	0.107	80	0.484	45	0.177
	2	seed525684	250	0.148	90	0.447	45	0.105
	2	seed544969	750	0.088	70	0.328	35	0.446
	2	seed609274	500	0.244	180	0.267	10	0.139
	2	seed622299	400	0.104	190	0.443	45	0.096
	2	seed623378	450	0.194	150	0.077	35	0.237
	2	seed640308	300	0.114	130	0.404	45	0.072
	2	seed666079	350	0.044	120	0.079	30	0.118
	2	seed693585	300	0.397	100	0.009	20	0.291	0.554575	0.808779	0.657978
	2	seed759645	550	0.117	70	0.156	45	0.436
	2	seed807321	250	0.255	200	0.273	50	0.491
	2	seed810579	650	0.267	190	0.172	25	0.153
	2	seed831322	450	0.437	100	0.457	10	0.091	0.558727	0.793222	0.655638
	2	seed837284	450	0.055	60	0.179	45	0.203
	2	seed837284	500	0.055	110	0.403	35	0.118
	2	seed860912	500	0.41	180	0.061	25	0.143	0.567549	0.780633	0.657252
	2	seed914634	250	0.415	70	0.051	45	0.268
	2	seed923422	500	0.082	160	0.006	25	0.034
	2	seed923422	650	0.082	120	0.133	35	0.299
	2	seed9496	750	0.203	100	0.412	35	0.003
	2	seed9496	750	0.203	110	0.211	15	0.303
	2	seed992113	300	0.015	50	0.265	15	0.041
	2	seed992113	750	0.015	60	0.463	20	0.035
	20	seed113704	700	0.491	110	0.37	25	0.369
	20	seed159043	450	0.169	160	0.132	45	0.385
	20	seed159043	650	0.169	100	0.082	30	0.47
	20	seed181091	650	0.418	50	0.039	10	0.279
	20	seed186720	650	0.134	180	0.075	20	0.166
	20	seed201241	250	0.376	100	0.109	10	0.358
	20	seed218795	300	0.013	170	0.436	25	0.109
	20	seed232222	650	0.405	80	0.089	45	0.484
	20	seed232549	650	0.222	170	0.233	50	0.156
	20	seed258801	600	0.06	170	0.326	40	0.485
	20	seed265179	550	0.088	150	0.23	15	0.295
	20	seed266817	500	0.336	200	0.078	25	0.446
	20	seed282731	600	0.469	80	0.465	20	0.145
	20	seed286219	600	0.177	110	0.384	50	0.068	0.569971	0.76968	0.654939
	20	seed292312	550	0.263	160	0.164	45	0.109	0.555094	0.812817	0.659677
	20	seed292312	700	0.263	60	0.145	25	0.355
	20	seed302688	350	0.391	50	0.046	20	0.172
	20	seed304663	350	0.096	190	0.023	20	0.256
	20	seed316607	500	0.251	100	0.268	45	0.459
	20	seed39995	650	0.345	170	0.175	50	0.05
	20	seed39995	650	0.345	190	0.202	40	0.413
	20	seed456078	400	0.061	70	0.477	45	0.5
	20	seed456078	550	0.061	120	0.095	30	0.363
	20	seed45769	450	0.363	170	0.459	25	0.076
	20	seed45769	650	0.363	80	0.004	15	0.056
	20	seed507291	650	0.203	160	0.132	30	0.398
	20	seed507291	650	0.203	60	0.3	15	0.313
	20	seed514247	250	0.294	80	0.325	50	0.181
	20	seed525684	600	0.17	60	0.208	25	0.067
	20	seed544969	400	0.079	150	0.349	25	0.019
	20	seed609274	750	0.318	100	0.08	20	0.384
	20	seed622299	700	0.199	60	0.098	30	0.288
	20	seed640308	300	0.486	140	0.103	15	0.129	0.565473	0.791142	0.659538
	20	seed666079	600	0.407	180	0.226	25	0.256
	20	seed693585	550	0.307	80	0.432	40	0.429
	20	seed759645	500	0.129	110	0.079	40	0.451
	20	seed807321	650	0.254	80	0.196	20	0.238
	20	seed810579	750	0.247	90	0.358	50	0.151	0.554056	0.807615	0.657228
	20	seed831322	600	0.401	180	0.015	20	0.189
	20	seed837284	300	0.23	130	0.021	40	0.323
	20	seed837284	550	0.23	160	0.418	10	0.343
	20	seed860912	400	0.062	110	0.263	35	0.353
	20	seed914634	350	0.077	160	0.264	20	0.086
	20	seed923422	500	0.24	100	0.377	10	0.113	0.562532	0.782671	0.654589
	20	seed923422	650	0.24	60	0.358	10	0.192	0.577063	0.770973	0.660071
	20	seed9496	200	0.495	90	0.08	30	0.433	0.565992	0.779419	0.655777
	20	seed9496	550	0.495	50	0.412	45	0.342
	20	seed992113	500	0.385	70	0.241	25	0.382
	20	seed992113	550	0.385	120	0.452	25	0.195
	21	seed113704	300	0.023	80	0.38	30	0.374
	21	seed159043	200	0.097	110	0.372	50	0.18
	21	seed159043	500	0.097	160	0.118	10	0.457	0.569625	0.773186	0.655976
	21	seed181091	350	0.25	120	0.182	40	0.477
	21	seed186720	400	0.252	200	0.392	30	0.042
	21	seed201241	750	0.346	170	0.407	35	0.284
	21	seed218795	650	0.434	100	0.388	20	0.219
	21	seed232222	500	0.353	140	0.187	25	0.442
	21	seed232549	450	0.461	190	0.118	40	0.196	0.561149	0.793154	0.657279
	21	seed258801	350	0.422	200	0.29	40	0.445
	21	seed265179	200	0.293	140	0.084	15	0.48	0.580349	0.778061	0.664817
	21	seed266817	700	0.215	140	0.393	10	0.428
	21	seed282731	250	0.2	90	0.01	45	0.005
	21	seed286219	300	0.342	120	0.416	30	0.088
	21	seed292312	200	0.199	180	0.262	20	0.486
	21	seed292312	350	0.199	200	0.015	40	0.322
	21	seed302688	450	0.453	110	0.173	10	0.463
	21	seed304663	400	0.138	100	0.04	50	0.107
	21	seed316607	350	0.439	190	0.371	20	0.112	0.543159	0.82199	0.654099
	21	seed39995	200	0.353	140	0.176	35	0.016
	21	seed39995	200	0.353	180	0.136	35	0.06	0.554575	0.802704	0.655959
	21	seed456078	250	0.258	120	0.316	10	0.337
	21	seed456078	500	0.258	140	0.097	20	0.136
	21	seed45769	700	0.092	170	0.461	45	0.332
	21	seed45769	750	0.092	140	0.391	25	0.299	0.556824	0.808997	0.659631
	21	seed507291	300	0.268	200	0.125	25	0.33
	21	seed507291	550	0.268	150	0.099	35	0.082	0.570317	0.797919	0.665187
	21	seed514247	600	0.165	100	0.142	20	0.483
	21	seed525684	700	0.409	170	0.162	50	0.277
	21	seed544969	550	0.487	70	0.163	35	0.064
	21	seed609274	700	0.48	180	0.454	15	0.36	0.566165	0.796932	0.662015
	21	seed622299	300	0.265	200	0.405	35	0.285
	21	seed640308	400	0.143	120	0.194	20	0.472
	21	seed666079	550	0.171	120	0.427	50	0.286
	21	seed693585	700	0.272	140	0.351	45	0.16
	21	seed759645	300	0.104	70	0.072	50	0.238
	21	seed807321	300	0.31	70	0.099	25	0.058
	21	seed810579	250	0.162	110	0.112	40	0.059	0.569798	0.766581	0.653701
	21	seed831322	350	0.238	100	0.189	50	0.19
	21	seed837284	300	0.192	170	0.385	35	0.464	0.562013	0.809417	0.6634
	21	seed837284	500	0.192	200	0.424	30	0.244
	21	seed860912	550	0.297	140	0.194	10	0.487
	21	seed914634	300	0.293	200	0.276	35	0.172
	21	seed923422	550	0.45	110	0.387	15	0.382
	21	seed923422	700	0.45	200	0.244	40	0.017	0.568587	0.789385	0.661036
	21	seed9496	400	0.227	80	0.432	50	0.359
	21	seed9496	450	0.227	120	0.336	45	0.228
	21	seed992113	300	0.358	190	0.064	20	0.486
	21	seed992113	750	0.358	200	0.196	30	0.314
	22	seed113704	450	0.055	70	0.009	35	0.121	0.546964	0.823652	0.65738
	22	seed159043	400	0.239	130	0.305	45	0.164
	22	seed159043	500	0.239	90	0.365	40	0.355
	22	seed181091	550	0.093	60	0.186	25	0.289
	22	seed186720	650	0.101	180	0.344	30	0.143
	22	seed201241	250	0.402	70	0.468	40	0.187
	22	seed218795	700	0.491	140	0.304	25	0.218
	22	seed232222	300	0.367	200	0.392	35	0.341
	22	seed232549	400	0.178	190	0.369	15	0.257
	22	seed258801	250	0.286	160	0.105	15	0.209
	22	seed265179	700	0.087	140	0.388	10	0.085
	22	seed266817	550	0.395	200	0.318	25	0.304
	22	seed282731	550	0.058	130	0.192	25	0.306
	22	seed286219	550	0.179	50	0.007	25	0.436
	22	seed292312	200	0.495	190	0.407	10	0.089
	22	seed292312	700	0.495	70	0.27	15	0.047
	22	seed302688	500	0.359	50	0.437	35	0.16
	22	seed304663	700	0.005	180	0.424	45	0.107
	22	seed316607	450	0.437	190	0.496	50	0.372
	22	seed39995	200	0.487	80	0.087	50	0.211
	22	seed39995	350	0.487	190	0.111	20	0.302
	22	seed456078	400	0.172	50	0.498	40	0.493
	22	seed456078	550	0.172	180	0.257	15	0.432
	22	seed45769	400	0.371	60	0.024	35	0.347
	22	seed45769	550	0.371	160	0.004	45	0.495
	22	seed507291	250	0.131	200	0.31	50	0.154
	22	seed507291	450	0.131	110	0.49	10	0.015
	22	seed514247	500	0.386	150	0.34	40	0.354
	22	seed525684	250	0.469	100	0.069	20	0.08	0.5653	0.783505	0.656752
	22	seed525684	400	0.469	60	0.463	20	0.413
	22	seed544969	200	0.133	90	0.199	10	0.116
	22	seed609274	300	0.103	140	0.237	10	0.466
	22	seed622299	250	0.036	80	0.331	15	0.379	0.557689	0.783285	0.651511
	22	seed640308	500	0.203	160	0.295	50	0.103
	22	seed666079	200	0.247	110	0.098	20	0.354
	22	seed693585	450	0.1	160	0.272	10	0.249
	22	seed759645	500	0.492	70	0.082	15	0.095
	22	seed807321	450	0.021	50	0.428	45	0.334
	22	seed810579	200	0.047	90	0.254	20	0.03
	22	seed831322	350	0.299	50	0.055	50	0.184
	22	seed837284	600	0.24	170	0.281	45	0.42
	22	seed837284	650	0.24	50	0.143	10	0.3
	22	seed860912	250	0.167	160	0.177	40	0.322
	22	seed914634	550	0.284	100	0.486	30	0.136
	22	seed923422	450	0.436	100	0.405	45	0.114
	22	seed923422	700	0.436	110	0.005	45	0.127
	22	seed9496	200	0.024	170	0.204	15	0.119
	22	seed9496	750	0.024	160	0.092	30	0.299
	22	seed992113	450	0.101	50	0.196	20	0.384
	22	seed992113	650	0.101	90	0.052	40	0.22
	23	seed113704	200	0.17	110	0.099	30	0.322
	23	seed159043	400	0.222	60	0.339	25	0.446
	23	seed159043	700	0.222	140	0.227	45	0.164
	23	seed181091	700	0.338	140	0.035	10	0.47	0.566684	0.782422	0.657303
	23	seed186720	350	0.472	120	0.27	35	0.359
	23	seed201241	600	0.145	120	0.459	35	0.429
	23	seed218795	300	0.327	140	0.319	25	0.001
	23	seed232222	650	0.067	130	0.329	45	0.35
	23	seed232549	750	0.305	60	0.172	30	0.499
	23	seed258801	650	0.211	50	0.304	40	0.11
	23	seed265179	700	0.402	120	0.21	50	0.076
	23	seed266817	200	0.187	100	0.293	15	0.042
	23	seed282731	400	0.446	100	0.412	10	0.012	0.563224	0.816449	0.666598
	23	seed286219	650	0.261	170	0.037	25	0.155
	23	seed292312	200	0.03	70	0.371	40	0.323
	23	seed292312	700	0.03	120	0.479	35	0.201
	23	seed302688	250	0.006	120	0.307	15	0.497
	23	seed304663	550	0.457	50	0.424	20	0.076	0.569798	0.783539	0.65979
	23	seed316607	750	0.04	150	0.028	45	0.477
	23	seed39995	550	0.404	130	0.165	50	0.234
	23	seed39995	550	0.404	80	0.329	35	0.135
	23	seed456078	700	0.306	170	0.4	50	0.377
	23	seed456078	750	0.306	120	0.309	50	0.287
	23	seed45769	200	0.384	110	0.198	30	0.226
	23	seed45769	550	0.384	80	0.03	10	0.38
	23	seed507291	250	0.443	190	0.222	30	0.068
	23	seed507291	750	0.443	190	0.353	40	0.131
	23	seed514247	250	0.33	60	0.216	30	0.248
	23	seed525684	250	0.074	130	0.012	20	0.149
	23	seed525684	700	0.074	200	0.015	25	0.195
	23	seed544969	550	0.083	60	0.031	50	0.129
	23	seed609274	750	0.262	190	0.43	15	0.461
	23	seed622299	300	0.228	80	0.457	40	0.098
	23	seed640308	250	0.096	170	0.269	25	0.401
	23	seed666079	200	0.186	140	0.415	40	0.119
	23	seed693585	200	0.183	150	0.053	20	0.455	0.561495	0.794614	0.658017
	23	seed759645	200	0.458	100	0.357	45	0.352
	23	seed807321	700	0.236	190	0.298	35	0.289
	23	seed810579	200	0.356	160	0.017	10	0.371
	23	seed831322	700	0.228	130	0.094	40	0.208	0.548867	0.812756	0.65524
	23	seed837284	650	0.422	60	0.143	15	0.367
	23	seed837284	700	0.422	100	0.151	35	0.445
	23	seed860912	550	0.446	110	0.294	25	0.448
	23	seed914634	350	0.081	90	0.185	45	0.178
	23	seed923422	300	0.107	130	0.201	20	0.078
	23	seed923422	750	0.107	110	0.405	20	0.458
	23	seed9496	250	0.27	110	0.22	10	0.235
	23	seed9496	650	0.27	160	0.264	50	0.486
	23	seed992113	650	0.279	60	0.007	30	0.5
	23	seed992113	750	0.279	180	0.216	10	0.174
	24	seed113704	300	0.456	200	0.087	10	0.134	0.573603	0.779868	0.661019
	24	seed159043	200	0.177	80	0.363	10	0.275
	24	seed159043	350	0.177	150	0.308	50	0.439
	24	seed181091	600	0.257	110	0.149	35	0.015
	24	seed186720	200	0.345	110	0.166	45	0.184
	24	seed201241	750	0.257	70	0.441	25	0.47	0.578793	0.757871	0.656336
	24	seed218795	250	0.198	50	0.435	45	0.473
	24	seed232222	450	0.473	90	0.224	30	0.345	0.574295	0.771375	0.658404
	24	seed232549	200	0.453	60	0.478	45	0.324
	24	seed258801	550	0.008	80	0.441	30	0.13
	24	seed265179	600	0.218	150	0.197	30	0.287
	24	seed266817	250	0.086	110	0.399	20	0.092
	24	seed286219	600	0.181	140	0.313	30	0.092
	24	seed292312	250	0.246	70	0.355	20	0.378
	24	seed292312	400	0.246	120	0.05	40	0.316
	24	seed302688	550	0.331	140	0.357	25	0.151
	24	seed304663	700	0.056	180	0.189	40	0.143
	24	seed316607	250	0.011	200	0.386	30	0.371
	24	seed39995	450	0.088	50	0.293	40	0.466
	24	seed39995	550	0.088	160	0.24	20	0.285
	24	seed456078	600	0.131	200	0.392	30	0.219
	24	seed456078	750	0.131	190	0.374	15	0.013
	24	seed45769	400	0.003	190	0.294	30	0.351
	24	seed45769	450	0.003	80	0.284	25	0.466
	24	seed507291	250	0.157	190	0.467	10	0.205
	24	seed507291	450	0.157	120	0.16	20	0.421
	24	seed514247	500	0.418	180	0.261	25	0.037
	24	seed525684	400	0.285	80	0.299	35	0.104
	24	seed525684	700	0.285	170	0.214	20	0.432
	24	seed544969	450	0.053	180	0.472	35	0.015
	24	seed609274	200	0.135	140	0.266	35	0.107
	24	seed622299	350	0.167	90	0.453	30	0.067	0.562013	0.789167	0.656496
	24	seed640308	250	0.332	100	0.328	25	0.463
	24	seed666079	250	0.132	80	0.494	10	0.459
	24	seed693585	250	0.122	60	0.096	15	0.429
	24	seed759645	650	0.23	80	0.445	35	0.406
	24	seed807321	350	0.38	120	0.209	25	0.304
	24	seed810579	750	0.461	160	0.078	50	0.417
	24	seed831322	350	0.469	160	0.423	35	0.188
	24	seed837284	200	0.464	90	0.27	45	0.14
	24	seed837284	750	0.464	150	0.213	15	0.066
	24	seed860912	500	0.247	70	0.417	15	0.286
	24	seed914634	350	0.098	110	0.384	20	0.204
	24	seed923422	350	0.086	80	0.382	15	0.335
	24	seed923422	650	0.086	50	0.142	25	0.037
	24	seed9496	500	0.176	120	0.26	15	0.451
	24	seed9496	700	0.176	200	0.083	30	0.19
	24	seed992113	300	0.398	70	0.346	35	0.478	0.571354	0.794181	0.664588
	24	seed992113	350	0.398	130	0.142	30	0.315
	25	seed113704	750	0.467	100	0.343	15	0.215
	25	seed159043	500	0.459	170	0.265	10	0.41
	25	seed159043	500	0.459	180	0.231	10	0.423
	25	seed181091	700	0.05	150	0.145	25	0.125	0.562532	0.773733	0.651442
	25	seed186720	250	0.479	120	0.321	35	0.106	0.569279	0.782082	0.658925
	25	seed201241	250	0.375	70	0.429	35	0.239
	25	seed218795	350	0.093	60	0.157	15	0.437
	25	seed232222	500	0.059	60	0.189	15	0.082
	25	seed232549	500	0.459	120	0.088	35	0.404
	25	seed258801	300	0.083	100	0.328	20	0.422
	25	seed265179	300	0.195	100	0.444	30	0.411
	25	seed266817	400	0.414	160	0.217	25	0.288	0.543505	0.82968	0.656773
	25	seed286219	550	0.202	190	0.168	50	0.487
	25	seed292312	250	0.172	60	0.207	25	0.396
	25	seed292312	650	0.172	200	0.251	45	0.145
	25	seed302688	400	0.479	120	0.358	35	0.432
	25	seed304663	450	0.215	180	0.096	25	0.142
	25	seed316607	200	0.151	80	0.096	25	0.446
	25	seed39995	250	0.014	140	0.243	25	0.128
	25	seed39995	750	0.014	110	0.265	30	0.017
	25	seed456078	200	0.097	200	0.408	15	0.126
	25	seed456078	600	0.097	170	0.29	30	0.113
	25	seed45769	450	0.175	90	0.292	10	0.404
	25	seed45769	650	0.175	180	0.165	10	0.142
	25	seed507291	700	0.387	110	0.316	10	0.119
	25	seed507291	750	0.387	110	0.216	45	0.449	0.582425	0.75375	0.657104
	25	seed514247	350	0.419	150	0.101	30	0.24
	25	seed525684	650	0.412	200	0.294	20	0.017
	25	seed525684	700	0.412	180	0.026	25	0.221
	25	seed544969	250	0.216	170	0.145	15	0.168
	25	seed609274	700	0.449	170	0.274	35	0.492
	25	seed622299	200	0.317	110	0.083	25	0.471
	25	seed640308	550	0.216	180	0.392	45	0.361
	25	seed666079	400	0.442	170	0.087	25	0.384
	25	seed693585	650	0.008	200	0.108	20	0.37
	25	seed759645	350	0.011	190	0.434	10	0.136
	25	seed807321	550	0.084	90	0.393	20	0.446
	25	seed810579	700	0.255	200	0.304	45	0.149
	25	seed831322	250	0.316	90	0.241	20	0.192	0.590382	0.740026	0.656788
	25	seed837284	350	0.356	180	0.119	45	0.258
	25	seed837284	750	0.356	160	0.081	10	0.077
	25	seed860912	500	0.421	140	0.091	40	0.252	0.563397	0.783686	0.65553
	25	seed914634	450	0.335	160	0.465	10	0.32
	25	seed923422	500	0.038	150	0.362	40	0.482
	25	seed923422	500	0.038	80	0.424	40	0.021
	25	seed9496	600	0.316	130	0.402	10	0.463
	25	seed9496	750	0.316	130	0.468	50	0.291
	25	seed992113	200	0.399	180	0.024	25	0.03
	25	seed992113	400	0.399	160	0.176	25	0.259
	26	seed113704	750	0.273	160	0.178	35	0.014	0.565992	0.782027	0.656698
	26	seed159043	300	0.065	180	0.327	40	0.364
	26	seed159043	500	0.065	180	0.076	35	0.327
	26	seed181091	350	0.189	60	0.149	15	0.046
	26	seed186720	400	0.124	140	0.371	45	0.321	0.572911	0.771668	0.6576
	26	seed201241	650	0.31	170	0.168	45	0.325
	26	seed218795	400	0.278	90	0.07	50	0.229	0.546445	0.81797	0.65519
	26	seed232222	300	0.182	170	0.401	35	0.286
	26	seed232549	400	0.181	170	0.263	45	0.045
	26	seed258801	550	0.369	110	0.324	50	0.349	0.564262	0.78357	0.656074
	26	seed265179	650	0.412	100	0.366	30	0.148
	26	seed266817	250	0.282	180	0.012	35	0.225
	26	seed286219	650	0.381	170	0.262	30	0.337
	26	seed292312	450	0.025	130	0.134	45	0.49
	26	seed292312	700	0.025	180	0.03	30	0.245
	26	seed302688	300	0.496	60	0.03	45	0.348	0.56063	0.807424	0.661766
	26	seed316607	250	0.134	110	0.329	45	0.46
	26	seed39995	350	0.335	180	0.09	15	0.436
	26	seed39995	350	0.335	80	0.474	10	0.414
	26	seed456078	350	0.441	170	0.433	15	0.289	0.570835	0.785901	0.661323
	26	seed456078	750	0.441	170	0.125	20	0.275
	26	seed45769	400	0.107	90	0.336	20	0.171
	26	seed45769	600	0.107	50	0.41	15	0.382
	26	seed507291	700	0.259	150	0.5	45	0.225
	26	seed507291	700	0.259	70	0.257	40	0.213
	26	seed514247	750	0.081	200	0.326	20	0.155
	26	seed525684	650	0.318	70	0.173	20	0.451
	26	seed544969	400	0.445	150	0.387	20	0.345	0.574468	0.79755	0.667873
	26	seed609274	600	0.234	90	0.055	25	0.059
	26	seed622299	450	0.073	180	0.424	20	0.243	0.560111	0.789371	0.655267
	26	seed640308	600	0.284	60	0.108	35	0.111
	26	seed666079	650	0.246	100	0.152	35	0.008
	26	seed693585	750	0.496	170	0.405	10	0.011
	26	seed759645	600	0.39	160	0.165	45	0.049
	26	seed807321	600	0.335	180	0.13	15	0.111
	26	seed810579	650	0.169	180	0.317	15	0.463
	26	seed831322	600	0.472	50	0.321	45	0.322
	26	seed837284	500	0.369	200	0.456	45	0.203
	26	seed837284	550	0.369	140	0.261	10	0.334	0.574814	0.763206	0.655747
	26	seed860912	750	0.026	130	0.307	10	0.053
	26	seed914634	600	0.179	130	0.076	35	0.106
	26	seed923422	400	0.093	50	0.137	25	0.304
	26	seed923422	550	0.093	120	0.377	35	0.351
	26	seed9496	300	0.081	160	0.063	40	0.186
	26	seed9496	600	0.081	130	0.08	15	0.022
	26	seed992113	250	0.27	110	0.426	15	0.02
	26	seed992113	600	0.27	160	0.446	50	0.035	0.552673	0.808247	0.656462
	27	seed113704	550	0.232	140	0.437	35	0.318
	27	seed159043	400	0.025	90	0.495	40	0.179
	27	seed159043	700	0.025	120	0.159	25	0.41
	27	seed181091	500	0.169	60	0.266	30	0.311
	27	seed186720	550	0.475	160	0.358	35	0.136
	27	seed201241	550	0.336	130	0.206	15	0.382
	27	seed218795	500	0.336	130	0.064	15	0.341
	27	seed232222	550	0.003	60	0.238	30	0.304
	27	seed232549	400	0.456	60	0.197	10	0.415	0.562186	0.779003	0.653069
	27	seed258801	700	0.205	50	0.143	35	0.059
	27	seed265179	400	0.398	200	0.481	10	0.43	0.569452	0.78381	0.659653
	27	seed266817	500	0.412	190	0.168	15	0.156
	27	seed286219	600	0.275	190	0.485	25	0.003
	27	seed292312	350	0.031	70	0.166	35	0.108
	27	seed292312	750	0.031	50	0.304	20	0.387	0.569971	0.777489	0.65775
	27	seed302688	650	0.187	110	0.123	20	0.472	0.554229	0.79563	0.653344
	27	seed316607	600	0.081	200	0.321	40	0.342
	27	seed39995	650	0.211	50	0.047	50	0.315
	27	seed39995	750	0.211	200	0.121	35	0.422
	27	seed456078	650	0.332	60	0.356	50	0.122
	27	seed456078	700	0.332	80	0.294	45	0.164
	27	seed45769	400	0.104	90	0.246	40	0.113
	27	seed45769	450	0.104	70	0.459	25	0.122
	27	seed507291	250	0.328	180	0.18	30	0.445
	27	seed507291	400	0.328	80	0.486	15	0.192
	27	seed514247	450	0.395	170	0.231	10	0.381
	27	seed525684	350	0.451	90	0.208	45	0.028	0.563916	0.775083	0.652849
	27	seed544969	300	0.115	140	0.192	40	0.126
	27	seed609274	700	0.1	190	0.166	10	0.365	0.576371	0.780876	0.663217
	27	seed622299	700	0.148	170	0.339	40	0.002
	27	seed640308	750	0.273	190	0.011	40	0.309
	27	seed666079	600	0.441	110	0.458	35	0.473
	27	seed693585	550	0.023	190	0.396	10	0.472
	27	seed759645	250	0.26	120	0.39	20	0.338
	27	seed807321	300	0.296	130	0.412	30	0.454
	27	seed810579	650	0.001	70	0.415	10	0.394
	27	seed831322	400	0.455	160	0.282	20	0.045
	27	seed837284	450	0.019	140	0.425	35	0.469
	27	seed860912	550	0.196	150	0.299	40	0.221
	27	seed914634	450	0.267	60	0.198	40	0.127
	27	seed923422	400	0.39	60	0.461	30	0.012
	27	seed923422	700	0.39	80	0.244	20	0.495
	27	seed9496	400	0.439	200	0.246	30	0.242
	27	seed9496	750	0.439	170	0.159	35	0.191
	27	seed992113	250	0.075	160	0.374	45	0.126
	27	seed992113	600	0.075	160	0.277	25	0.431
	28	seed113704	250	0.274	110	0.023	40	0.144
	28	seed159043	450	0.116	180	0.456	50	0.397
	28	seed159043	650	0.116	150	0.352	50	0.432
	28	seed181091	450	0.408	150	0.407	10	0.142
	28	seed186720	600	0.155	90	0.215	15	0.065
	28	seed201241	200	0.154	180	0.288	50	0.275
	28	seed218795	400	0.083	60	0.34	35	0.455
	28	seed232222	200	0.487	100	0.168	15	0.016
	28	seed232549	550	0.378	80	0.13	35	0.489	0.553364	0.803365	0.655331
	28	seed258801	400	0.463	120	0.115	15	0.482	0.563051	0.792164	0.658241
	28	seed265179	250	0.36	190	0.494	40	0.198	0.559592	0.796406	0.65732
	28	seed266817	500	0.464	120	0.174	15	0.176
	28	seed286219	550	0.182	70	0.081	30	0.226
	28	seed292312	450	0.303	130	0.345	50	0.16
	28	seed292312	650	0.303	170	0.255	25	0.466
	28	seed302688	700	0.474	120	0.246	30	0.092
	28	seed316607	550	0.22	120	0.458	45	0.478
	28	seed39995	300	0.116	100	0.313	50	0.362
	28	seed39995	450	0.116	160	0.401	25	0.164
	28	seed456078	200	0.401	110	0.25	10	0.479
	28	seed456078	700	0.401	50	0.226	35	0.023
	28	seed45769	300	0.423	130	0.099	10	0.266
	28	seed45769	750	0.423	170	0.391	30	0.273
	28	seed507291	250	0.303	180	0.028	50	0.169
	28	seed507291	600	0.303	70	0.072	20	0.462
	28	seed514247	700	0.185	100	0.439	25	0.434
	28	seed525684	350	0.185	200	0.162	20	0.488
	28	seed544969	450	0.409	60	0.388	15	0.183
	28	seed609274	350	0.217	180	0.45	30	0.431
	28	seed622299	350	0.437	130	0.178	45	0.478
	28	seed640308	250	0.308	110	0.37	45	0.118
	28	seed666079	350	0.048	90	0.472	15	0.273
	28	seed693585	700	0.369	100	0.372	45	0.304
	28	seed759645	700	0.212	130	0.197	45	0.213
	28	seed807321	300	0.008	160	0.221	25	0.336
	28	seed810579	600	0.033	50	0.008	35	0.229
	28	seed831322	700	0.307	120	0.314	40	0.435
	28	seed837284	700	0.479	80	0.473	30	0.285
	28	seed860912	400	0.087	160	0.498	45	0.216
	28	seed914634	700	0.249	110	0.49	30	0.079
	28	seed923422	250	0.104	190	0.005	35	0.444
	28	seed923422	600	0.104	160	0.434	25	0.11
	28	seed9496	650	0.446	160	0.419	40	0.056
	28	seed9496	700	0.446	200	0.364	10	0.375	0.569279	0.775082	0.656428
	28	seed992113	600	0.238	180	0.041	40	0.216
	28	seed992113	700	0.238	130	0.118	50	0.362
	29	seed113704	550	0.348	140	0.378	35	0.162
	29	seed159043	350	0.02	150	0.249	30	0.22
	29	seed159043	600	0.02	130	0.16	25	0.289
	29	seed181091	400	0.402	100	0.368	30	0.118
	29	seed186720	300	0.024	60	0.375	25	0.052
	29	seed201241	350	0.238	100	0.462	20	0.33
	29	seed218795	300	0.24	200	0.16	30	0.232
	29	seed232222	300	0.108	170	0.309	40	0.462	0.556132	0.793827	0.654054
	29	seed232549	750	0.374	180	0.413	15	0.23	0.567549	0.791556	0.661092
	29	seed258801	200	0.114	200	0.182	20	0.115
	29	seed265179	750	0.16	70	0.135	15	0.191
	29	seed266817	400	0.329	180	0.312	15	0.401
	29	seed286219	700	0.215	170	0.106	50	0.172
	29	seed292312	300	0.043	150	0.018	20	0.073
	29	seed292312	650	0.043	110	0.479	15	0.367
	29	seed302688	700	0.081	160	0.151	10	0.13
	29	seed316607	700	0.296	180	0.482	50	0.13
	29	seed39995	300	0.081	140	0.174	40	0.119
	29	seed39995	350	0.081	70	0.122	35	0.226
	29	seed456078	350	0.092	150	0.347	25	0.109
	29	seed456078	350	0.092	60	0.069	30	0.469
	29	seed45769	200	0.473	90	0.111	50	0.27	0.558381	0.82982	0.667563
	29	seed45769	250	0.473	170	0.004	20	0.026
	29	seed507291	250	0.447	190	0.094	35	0.24
	29	seed507291	700	0.447	50	0.371	15	0.283
	29	seed514247	750	0.467	140	0.048	30	0.111
	29	seed525684	200	0.201	170	0.069	15	0.045
	29	seed544969	750	0.013	150	0.062	40	0.481
	29	seed609274	450	0.448	60	0.443	25	0.359
	29	seed622299	450	0.342	200	0.095	35	0.275
	29	seed640308	200	0.153	110	0.368	10	0.487
	29	seed666079	450	0.434	150	0.456	20	0.497
	29	seed693585	600	0.18	160	0.457	45	0.491
	29	seed759645	700	0.225	50	0.141	45	0.26
	29	seed807321	650	0.307	80	0.32	30	0.461
	29	seed810579	500	0.061	180	0.081	15	0.417
	29	seed831322	550	0.103	170	0.205	20	0.396
	29	seed837284	650	0.434	170	0.048	35	0.421
	29	seed860912	600	0.203	190	0.308	35	0.217
	29	seed914634	400	0.012	140	0.154	50	0.1
	29	seed923422	250	0.222	50	0.405	30	0.436
	29	seed923422	450	0.222	140	0.009	30	0.455
	29	seed9496	500	0.095	120	0.059	25	0.423
	29	seed9496	750	0.095	130	0.16	40	0.184
	29	seed992113	450	0.185	80	0.061	10	0.431
	29	seed992113	600	0.185	80	0.229	40	0.072
	3	seed113704	200	0.029	180	0.32	45	0.342
	3	seed159043	250	0.004	160	0.157	30	0.179
	3	seed159043	650	0.004	60	0.498	40	0.249
	3	seed181091	650	0.215	190	0.437	15	0.135
	3	seed186720	400	0.017	180	0.379	25	0.149
	3	seed201241	550	0.174	70	0.059	20	0.306	0.548694	0.80182	0.651535
	3	seed218795	450	0.339	180	0.376	20	0.311
	3	seed232222	400	0.404	90	0.39	35	0.308
	3	seed232549	300	0.311	60	0.35	45	0.115
	3	seed258801	450	0.359	140	0.109	10	0.199	0.57983	0.784828	0.666932
	3	seed265179	650	0.117	130	0.5	15	0.299
	3	seed266817	400	0.199	80	0.036	50	0.242
	3	seed282731	450	0.075	190	0.069	15	0.218
	3	seed286219	400	0.166	150	0.475	25	0.44
	3	seed292312	600	0.484	130	0.424	50	0.108
	3	seed292312	600	0.484	90	0.259	20	0.018
	3	seed302688	600	0.358	120	0.342	40	0.264
	3	seed304663	650	0.093	110	0.063	20	0.25
	3	seed316607	600	0.487	180	0.442	50	0.4
	3	seed39995	450	0.322	140	0.149	15	0.346
	3	seed39995	450	0.322	80	0.315	15	0.135
	3	seed456078	250	0.447	120	0.278	35	0.483
	3	seed456078	650	0.447	160	0.097	50	0.062	0.56876	0.796126	0.663505
	3	seed45769	400	0.051	170	0.43	40	0.348
	3	seed45769	450	0.051	120	0.053	25	0.431
	3	seed507291	700	0.425	160	0.45	35	0.445
	3	seed507291	750	0.425	80	0.496	20	0.371	0.554748	0.799751	0.655091
	3	seed514247	400	0.043	120	0.209	40	0.316
	3	seed525684	400	0.256	200	0.19	45	0.014
	3	seed544969	650	0.086	50	0.37	25	0.244
	3	seed609274	550	0.311	200	0.38	30	0.189
	3	seed622299	300	0.044	50	0.112	45	0.329
	3	seed623378	700	0.013	70	0.231	45	0.394
	3	seed640308	500	0.059	130	0.171	40	0.478
	3	seed666079	450	0.324	110	0.265	15	0.44
	3	seed693585	200	0.457	80	0.033	15	0.27	0.568587	0.768889	0.653739
	3	seed759645	600	0.295	80	0.053	50	0.39
	3	seed807321	600	0.015	160	0.12	35	0.497
	3	seed810579	750	0.417	80	0.149	30	0.394
	3	seed831322	200	0.194	170	0.044	45	0.333
	3	seed837284	450	0.028	100	0.209	45	0.469
	3	seed837284	600	0.028	150	0.245	45	0.039	0.57343	0.809919	0.67146
	3	seed860912	250	0.326	140	0.277	50	0.264
	3	seed914634	450	0.106	190	0.03	25	0.118
	3	seed923422	450	0.097	120	0.295	25	0.409
	3	seed923422	550	0.097	80	0.368	50	0.489
	3	seed9496	350	0.388	90	0.329	10	0.131
	3	seed9496	500	0.388	100	0.336	30	0.234
	3	seed992113	200	0.109	90	0.279	45	0.126
	3	seed992113	550	0.109	150	0.209	30	0.229
	30	seed113704	450	0.202	140	0.003	25	0.368
	30	seed159043	650	0.406	120	0.107	40	0.302
	30	seed159043	650	0.406	180	0.19	30	0.29	0.550597	0.815318	0.657305
	30	seed181091	400	0.039	130	0.484	30	0.314
	30	seed186720	500	0.202	140	0.319	45	0.238
	30	seed201241	450	0.466	140	0.285	20	0.415	0.566684	0.782422	0.657303
	30	seed218795	200	0.285	110	0.199	10	0.127
	30	seed232222	750	0.315	200	0.129	30	0.06
	30	seed232549	450	0.229	160	0.393	15	0.079
	30	seed258801	650	0.204	160	0.382	15	0.108
	30	seed265179	250	0.416	110	0.345	35	0.212	0.568068	0.785458	0.659305
	30	seed266817	550	0.42	70	0.05	10	0.392	0.5525	0.807381	0.656054
	30	seed286219	200	0.275	120	0.332	40	0.054
	30	seed292312	250	0.062	160	0.134	40	0.354
	30	seed292312	500	0.062	130	0.096	25	0.103
	30	seed302688	250	0.068	90	0.386	20	0.18
	30	seed316607	650	0.01	180	0.223	35	0.314
	30	seed39995	650	0.321	200	0.27	40	0.428
	30	seed39995	700	0.321	120	0.202	50	0.26
	30	seed456078	500	0.199	120	0.314	40	0.174
	30	seed456078	700	0.199	130	0.045	30	0.108
	30	seed45769	300	0.021	190	0.198	45	0.442
	30	seed45769	650	0.021	80	0.391	25	0.395
	30	seed507291	300	0.097	140	0.44	50	0.106
	30	seed507291	400	0.097	200	0.214	40	0.159
	30	seed514247	650	0.137	60	0.11	40	0.491
	30	seed525684	250	0.24	90	0.015	20	0.102
	30	seed544969	550	0.216	50	0.314	20	0.3
	30	seed609274	650	0.258	110	0.304	30	0.394
	30	seed622299	600	0.203	200	0.403	25	0.363
	30	seed640308	600	0.144	110	0.034	20	0.125	0.535202	0.827273	0.649932
	30	seed666079	650	0.303	160	0.487	20	0.393	0.568933	0.784964	0.659713
	30	seed693585	400	0.18	110	0.373	45	0.353
	30	seed759645	650	0.139	90	0.184	20	0.227
	30	seed807321	450	0.169	90	0.009	40	0.001	0.570144	0.768478	0.654618
	30	seed810579	200	0.418	110	0.174	40	0.312
	30	seed831322	700	0.028	190	0.147	20	0.292
	30	seed837284	600	0.016	140	0.023	30	0.368
	30	seed860912	700	0.192	200	0.449	40	0.337
	30	seed914634	450	0.45	140	0.128	15	0.464
	30	seed923422	250	0.199	120	0.269	45	0.312
	30	seed923422	550	0.199	120	0.382	35	0.137
	30	seed9496	200	0.136	50	0.233	15	0.389
	30	seed9496	650	0.136	160	0.039	10	0.209
	30	seed992113	500	0.179	120	0.497	45	0.379	0.572219	0.772356	0.657393
	30	seed992113	500	0.179	160	0.285	15	0.343
	31	seed113704	400	0.169	190	0.263	20	0.252
	31	seed159043	500	0.152	100	0.182	50	0.33
	31	seed159043	650	0.152	160	0.268	40	0.236
	31	seed181091	750	0.088	160	0.065	40	0.321
	31	seed186720	300	0.317	110	0.235	35	0.422
	31	seed201241	550	0.285	130	0.21	25	0.206
	31	seed218795	500	0.091	160	0.091	25	0.313
	31	seed232222	450	0.359	190	0.173	15	0.386
	31	seed232549	250	0.126	60	0.399	50	0.074
	31	seed258801	250	0.372	200	0.021	35	0.476
	31	seed265179	550	0.195	70	0.296	15	0.083
	31	seed266817	300	0.113	200	0.471	45	0.318
	31	seed286219	550	0.219	100	0.43	50	0.173
	31	seed292312	400	0.495	200	0.151	25	0.069
	31	seed292312	600	0.495	150	0.094	50	0.17
	31	seed302688	600	0.206	140	0.446	50	0.179
	31	seed316607	550	0.047	120	0.492	20	0.47
	31	seed39995	700	0.118	170	0.177	20	0.051
	31	seed39995	750	0.118	170	0.176	40	0.021	0.566511	0.780505	0.65651
	31	seed456078	300	0.171	140	0.254	20	0.227
	31	seed456078	350	0.171	200	0.214	40	0.431
	31	seed45769	500	0.138	170	0.284	25	0.055
	31	seed45769	750	0.138	150	0.023	25	0.461
	31	seed507291	300	0.08	70	0.258	35	0.419
	31	seed507291	700	0.08	160	0.189	10	0.288
	31	seed514247	250	0.066	160	0.086	45	0.352
	31	seed525684	450	0.21	200	0.214	45	0.006
	31	seed544969	400	0.492	80	0.119	35	0.446
	31	seed609274	300	0.439	100	0.312	40	0.14
	31	seed622299	500	0.359	90	0.058	25	0.45	0.562532	0.794333	0.658633
	31	seed640308	750	0.43	70	0.136	40	0.437
	31	seed666079	450	0.114	180	0.191	35	0.247
	31	seed693585	500	0.454	190	0.105	15	0.4
	31	seed759645	550	0.096	140	0.483	35	0.493
	31	seed807321	750	0.375	170	0.196	10	0.476
	31	seed810579	200	0.207	190	0.047	30	0.019
	31	seed831322	450	0.132	50	0.046	35	0.218	0.544024	0.833775	0.658432
	31	seed837284	200	0.169	110	0.057	50	0.177
	31	seed860912	750	0.032	80	0.363	35	0.445
	31	seed914634	750	0.079	170	0.164	25	0.061
	31	seed923422	300	0.262	140	0.066	50	0.328
	31	seed923422	350	0.262	80	0.424	35	0.064
	31	seed9496	450	0.047	190	0.05	35	0.264
	31	seed9496	650	0.047	100	0.31	35	0.153
	31	seed992113	200	0.02	110	0.481	50	0.019
	31	seed992113	300	0.02	160	0.438	30	0.203
	32	seed113704	250	0.367	130	0.1	20	0.475
	32	seed159043	450	0.188	110	0.306	20	0.012
	32	seed159043	650	0.188	150	0.132	30	0.172
	32	seed181091	300	0.057	200	0.123	45	0.217
	32	seed186720	750	0.443	100	0.403	30	0.171
	32	seed201241	550	0.216	90	0.04	15	0.213
	32	seed218795	500	0.432	130	0.29	50	0.274
	32	seed232222	700	0.2	150	0.006	50	0.27
	32	seed232549	600	0.49	190	0.084	35	0.446	0.560284	0.805121	0.660751
	32	seed258801	300	0.378	180	0.055	35	0.154
	32	seed265179	500	0.069	190	0.193	50	0.383	0.554748	0.792439	0.652625
	32	seed266817	550	0.292	50	0.448	10	0.201
	32	seed286219	200	0.453	190	0.248	40	0.176
	32	seed292312	200	0.363	60	0.164	50	0.044
	32	seed292312	600	0.363	180	0.211	35	0.245	0.561322	0.788387	0.655754
	32	seed302688	200	0.434	140	0.043	35	0.465
	32	seed316607	200	0.263	150	0.088	10	0.011
	32	seed39995	300	0.47	130	0.087	45	0.246
	32	seed39995	700	0.47	190	0.024	50	0.28
	32	seed456078	200	0.446	150	0.367	45	0.499
	32	seed456078	300	0.446	200	0.006	35	0.151	0.551116	0.820711	0.659423
	32	seed45769	200	0.185	110	0.292	45	0.037
	32	seed45769	200	0.185	140	0.452	50	0.213	0.577409	0.757775	0.655409
	32	seed507291	750	0.294	130	0.495	10	0.027
	32	seed507291	750	0.294	50	0.132	50	0.434
	32	seed514247	450	0.296	160	0.445	15	0.172
	32	seed525684	300	0.373	70	0.026	15	0.188
	32	seed544969	200	0.299	180	0.23	40	0.162
	32	seed609274	500	0.059	140	0.147	25	0.48
	32	seed622299	300	0.109	50	0.265	50	0.445
	32	seed640308	650	0.442	170	0.05	20	0.327
	32	seed666079	550	0.132	190	0.325	35	0.37
	32	seed693585	250	0.329	170	0.447	50	0.232
	32	seed759645	500	0.407	170	0.435	30	0.392
	32	seed807321	650	0.34	160	0.267	10	0.087
	32	seed810579	200	0.188	150	0.234	40	0.338
	32	seed831322	550	0.25	140	0.279	10	0.448
	32	seed837284	200	0.497	200	0.021	45	0.321
	32	seed860912	400	0.024	110	0.352	15	0.026
	32	seed914634	550	0.321	180	0.271	40	0.297
	32	seed923422	200	0.008	200	0.137	35	0.113
	32	seed923422	300	0.008	190	0.339	50	0.42
	32	seed9496	250	0.045	110	0.042	40	0.078
	32	seed9496	450	0.045	80	0.419	15	0.09
	32	seed992113	600	0.206	110	0.437	45	0.131
	32	seed992113	650	0.206	200	0.241	10	0.076
	33	seed113704	400	0.045	150	0.219	15	0.08
	33	seed159043	200	0.113	120	0.118	15	0.447
	33	seed181091	500	0.43	90	0.048	20	0.34
	33	seed186720	350	0.418	160	0.325	25	0.034
	33	seed201241	450	0.138	170	0.303	25	0.134
	33	seed218795	650	0.192	170	0.296	20	0.489
	33	seed232222	700	0.443	180	0.206	35	0.209
	33	seed232549	250	0.181	50	0.011	30	0.048
	33	seed258801	750	0.492	90	0.108	45	0.363
	33	seed265179	200	0.101	160	0.006	35	0.487
	33	seed266817	350	0.153	110	0.411	15	0.36
	33	seed286219	700	0.445	90	0.269	25	0.294
	33	seed292312	550	0.361	50	0.177	30	0.374
	33	seed292312	700	0.361	60	0.015	30	0.123
	33	seed302688	750	0.415	100	0.425	20	0.317
	33	seed304663	200	0.039	80	0.273	25	0.42
	33	seed316607	700	0.142	80	0.087	30	0.339
	33	seed39995	300	0.212	170	0.346	45	0.277
	33	seed39995	450	0.212	140	0.165	45	0.112
	33	seed456078	750	0.113	130	0.203	20	0.003
	33	seed45769	200	0.256	80	0.336	50	0.487
	33	seed45769	550	0.256	170	0.204	20	0.143
	33	seed507291	300	0.213	180	0.086	30	0.382
	33	seed507291	600	0.213	100	0.099	50	0.149
	33	seed514247	300	0.25	60	0.312	10	0.481
	33	seed525684	400	0.168	110	0.329	45	0.244
	33	seed544969	650	0.484	200	0.313	40	0.215
	33	seed609274	650	0.221	180	0.309	40	0.396
	33	seed622299	500	0.426	120	0.446	20	0.395
	33	seed623378	600	0.483	170	0.187	30	0.034
	33	seed640308	450	0.333	190	0.357	10	0.055
	33	seed666079	450	0.078	130	0.204	10	0.214
	33	seed693585	350	0.445	140	0.09	40	0.189
	33	seed759645	750	0.249	110	0.308	35	0.226
	33	seed807321	550	0.455	130	0.359	40	0.488
	33	seed810579	450	0.474	180	0.208	10	0.438
	33	seed831322	250	0.398	180	0.115	25	0.069
	33	seed837284	600	0.156	70	0.424	10	0.209
	33	seed860912	250	0.24	160	0.451	20	0.283
	33	seed914634	250	0.091	190	0.256	40	0.458
	33	seed923422	250	0.418	190	0.427	35	0.441
	33	seed923422	350	0.418	200	0.461	50	0.017
	33	seed9496	200	0.03	100	0.033	25	0.208
	33	seed992113	400	0.002	180	0.281	30	0.095
	33	seed992113	450	0.002	150	0.064	45	0.454
	33	seed992113	550	0.002	130	0.041	35	0.174
	34	seed113704	600	0.456	190	0.118	40	0.196
	34	seed159043	200	0.347	130	0.305	35	0.087
	34	seed181091	200	0.228	150	0.214	20	0.281
	34	seed186720	300	0.476	60	0.275	20	0.474
	34	seed201241	550	0.498	170	0.285	40	0.442
	34	seed218795	350	0.311	50	0.462	15	0.371
	34	seed232222	750	0.245	110	0.179	20	0.19
	34	seed232549	650	0.447	180	0.137	35	0.192
	34	seed258801	500	0.282	50	0.176	30	0.157
	34	seed265179	550	0.182	130	0.196	50	0.302
	34	seed266817	250	0.372	100	0.003	50	0.29
	34	seed286219	250	0.345	70	0.412	25	0.5
	34	seed292312	200	0.278	50	0.197	20	0.423
	34	seed292312	350	0.278	100	0.407	15	0.426
	34	seed302688	200	0.411	200	0.152	25	0.395
	34	seed304663	650	0.121	170	0.044	15	0.243
	34	seed316607	250	0.175	90	0.342	45	0.405
	34	seed39995	200	0.296	70	0.364	25	0.263
	34	seed39995	250	0.296	80	0.24	15	0.063
	34	seed456078	450	0.179	70	0.5	15	0.395
	34	seed45769	700	0.382	50	0.246	50	0.076
	34	seed45769	750	0.382	140	0.076	20	0.14
	34	seed507291	200	0.369	130	0.304	20	0.385
	34	seed507291	450	0.369	180	0.31	30	0.432
	34	seed514247	450	0.248	180	0.427	45	0.003
	34	seed525684	400	0.085	180	0.402	50	0.067
	34	seed544969	300	0.142	70	0.443	50	0.434
	34	seed609274	500	0.309	80	0.379	20	0.442
	34	seed622299	700	0.329	100	0.042	35	0.431
	34	seed623378	250	0.237	120	0.257	50	0.318
	34	seed640308	350	0.272	110	0.491	40	0.218
	34	seed666079	500	0.156	60	0.068	40	0.013
	34	seed693585	650	0.409	140	0.195	35	0.082
	34	seed759645	600	0.401	190	0.291	50	0.023
	34	seed807321	650	0.028	170	0.464	15	0.065
	34	seed810579	350	0.043	150	0.231	25	0.458
	34	seed831322	450	0.215	120	0.14	20	0.343
	34	seed837284	350	0.329	100	0.281	20	0.104
	34	seed860912	250	0.226	70	0.06	30	0.318
	34	seed914634	250	0.18	100	0.013	35	0.093
	34	seed923422	250	0.46	110	0.279	15	0.265
	34	seed923422	250	0.46	200	0.434	40	0.127
	34	seed9496	500	0.211	120	0.342	20	0.054
	34	seed992113	500	0.13	150	0.229	30	0.315
	34	seed992113	650	0.13	140	0.196	30	0.211
	34	seed992113	750	0.13	150	0.282	15	0.322
	35	seed113704	550	0.291	200	0.398	20	0.444
	35	seed159043	200	0.342	50	0.339	40	0.287
	35	seed181091	650	0.182	190	0.014	35	0.475
	35	seed186720	250	0.083	90	0.056	15	0.412
	35	seed201241	300	0.117	90	0.222	50	0.173
	35	seed218795	650	0.102	50	0.143	40	0.162
	35	seed232222	600	0.451	60	0.211	30	0.3
	35	seed232549	300	0.372	130	0.001	40	0.058
	35	seed258801	400	0.116	180	0.067	45	0.49
	35	seed265179	650	0.04	180	0.42	25	0.293
	35	seed266817	350	0.163	50	0.201	50	0.478
	35	seed282731	600	0.054	140	0.327	25	0.448
	35	seed286219	600	0.015	160	0.442	35	0.432
	35	seed292312	250	0.017	200	0.085	50	0.041
	35	seed292312	300	0.017	80	0.479	10	0.165
	35	seed302688	550	0.02	150	0.3	50	0.104
	35	seed304663	600	0.238	120	0.21	50	0.099
	35	seed316607	250	0.238	120	0.336	35	0.411
	35	seed39995	550	0.135	180	0.412	50	0.014
	35	seed39995	550	0.135	190	0.265	45	0.383
	35	seed45769	300	0.153	100	0.099	30	0.299
	35	seed45769	650	0.153	80	0.069	10	0.116
	35	seed507291	400	0.214	110	0.43	30	0.106
	35	seed507291	400	0.214	50	0.353	25	0.09
	35	seed514247	200	0.112	160	0.367	15	0.019
	35	seed525684	750	0.036	100	0.066	10	0.277
	35	seed544969	600	0.166	130	0.498	50	0.424
	35	seed609274	600	0.042	100	0.071	50	0.029
	35	seed622299	600	0.202	100	0.382	10	0.06
	35	seed623378	300	0.442	190	0.485	35	0.091
	35	seed640308	250	0.422	180	0.45	10	0.244
	35	seed666079	550	0.095	80	0.102	25	0.064
	35	seed693585	350	0.486	180	0.44	35	0.368
	35	seed759645	600	0.081	70	0.227	35	0.153
	35	seed807321	250	0.017	100	0.132	30	0.094
	35	seed810579	600	0.309	170	0.308	25	0.493
	35	seed831322	200	0.443	200	0.204	20	0.215
	35	seed837284	650	0.246	180	0.143	45	0.351
	35	seed860912	700	0.438	50	0.482	15	0.146
	35	seed914634	600	0.194	200	0.244	50	0.243
	35	seed923422	650	0.261	120	0.458	10	0.24
	35	seed923422	750	0.261	50	0.009	45	0.458
	35	seed9496	200	0.329	60	0.228	20	0.139
	35	seed992113	400	0.076	160	0.216	45	0.347
	35	seed992113	500	0.076	100	0.497	15	0.03
	35	seed992113	600	0.076	180	0.146	15	0.477
	36	seed113704	250	0.18	180	0.056	20	0.297
	36	seed159043	450	0.264	100	0.308	45	0.424
	36	seed159043	500	0.264	90	0.023	30	0.267
	36	seed181091	550	0.448	150	0.266	10	0.134
	36	seed186720	650	0.332	60	0.239	35	0.192
	36	seed201241	400	0.096	60	0.218	35	0.028
	36	seed218795	350	0.399	180	0.043	25	0.419
	36	seed232222	550	0.129	170	0.419	50	0.024
	36	seed232549	350	0.008	60	0.413	10	0.41
	36	seed258801	250	0.305	190	0.184	40	0.071
	36	seed265179	250	0.18	140	0.313	35	0.045
	36	seed266817	700	0.49	50	0.027	45	0.037
	36	seed282731	450	0.119	50	0.253	30	0.354
	36	seed286219	700	0.306	70	0.353	40	0.356
	36	seed292312	400	0.361	170	0.448	25	0.435
	36	seed292312	700	0.361	100	0.355	30	0.03
	36	seed302688	550	0.038	180	0.353	25	0.407
	36	seed304663	550	0.211	50	0.347	35	0.08
	36	seed316607	450	0.449	80	0.139	25	0.137
	36	seed39995	600	0.354	160	0.474	30	0.196
	36	seed39995	700	0.354	120	0.442	30	0.237
	36	seed45769	200	0.49	170	0.005	15	0.35
	36	seed45769	700	0.49	150	0.111	50	0.495
	36	seed507291	300	0.001	80	0.16	40	0.211
	36	seed507291	650	0.001	90	0.208	45	0.213
	36	seed514247	600	0.468	130	0.249	45	0.159
	36	seed525684	700	0.141	90	0.062	35	0.08
	36	seed544969	450	0.469	160	0.03	40	0.209
	36	seed609274	450	0.204	110	0.185	50	0.27
	36	seed622299	700	0.031	190	0.344	45	0.368
	36	seed623378	400	0.373	60	0.266	35	0.014
	36	seed640308	400	0.294	90	0.07	45	0.02
	36	seed666079	300	0.036	150	0.195	25	0.316
	36	seed693585	250	0.145	160	0.239	40	0.294
	36	seed759645	550	0.002	140	0.094	30	0.2
	36	seed807321	400	0.159	110	0.259	35	0.147
	36	seed810579	650	0.328	120	0.207	15	0.486
	36	seed831322	650	0.188	70	0.48	35	0.215
	36	seed837284	700	0.284	110	0.27	35	0.239
	36	seed860912	250	0.445	190	0.388	20	0.351
	36	seed914634	250	0.231	70	0.448	30	0.414
	36	seed923422	250	0.043	50	0.269	35	0.335
	36	seed923422	750	0.043	70	0.25	30	0.186
	36	seed9496	600	0.115	160	0.299	40	0.022
	36	seed992113	300	0.407	190	0.438	20	0.02
	36	seed992113	500	0.407	190	0.142	25	0.49
	36	seed992113	550	0.407	200	0.152	20	0.405
	37	seed113704	350	0.141	120	0.228	20	0.432
	37	seed159043	200	0.153	160	0.444	15	0.447
	37	seed159043	550	0.153	170	0.265	30	0.256
	37	seed181091	500	0.268	160	0.461	40	0.114
	37	seed186720	650	0.339	60	0.398	15	0.466
	37	seed201241	300	0.323	130	0.284	50	0.188
	37	seed218795	700	0.052	190	0.142	15	0.282
	37	seed232222	750	0.152	120	0.076	20	0.28
	37	seed232549	650	0.173	200	0.123	30	0.336
	37	seed258801	250	0.114	130	0.221	40	0.413
	37	seed265179	250	0.377	200	0.363	10	0.144
	37	seed266817	600	0.066	180	0.001	30	0.456
	37	seed282731	750	0.393	120	0.39	40	0.077
	37	seed286219	750	0.105	150	0.486	25	0.058
	37	seed292312	300	0.344	120	0.386	40	0.024
	37	seed292312	400	0.344	100	0.207	10	0.075
	37	seed302688	650	0.484	50	0.193	15	0.099
	37	seed304663	350	0.48	70	0.334	30	0.419
	37	seed316607	250	0.017	150	0.206	20	0.431
	37	seed39995	200	0.172	120	0.033	40	0.354
	37	seed39995	350	0.172	110	0.121	25	0.492
	37	seed45769	550	0.475	200	0.391	50	0.226
	37	seed45769	750	0.475	140	0.392	25	0.054
	37	seed507291	200	0.073	70	0.388	25	0.078
	37	seed507291	650	0.073	110	0.316	15	0.188
	37	seed514247	300	0.424	100	0.278	15	0.11
	37	seed525684	450	0.346	80	0.386	45	0.195
	37	seed544969	350	0.273	110	0.173	40	0.322
	37	seed609274	450	0.238	110	0.221	50	0.376
	37	seed622299	250	0.331	170	0.321	35	0.166
	37	seed623378	200	0.37	80	0.497	20	0.21
	37	seed640308	200	0.403	90	0.247	45	0.158
	37	seed666079	200	0.128	170	0.2	40	0.38
	37	seed693585	450	0.469	170	0.257	40	0.025
	37	seed759645	300	0.099	120	0.023	40	0.461
	37	seed807321	250	0.391	160	0.237	35	0.231
	37	seed810579	600	0.472	150	0.46	10	0.056
	37	seed831322	300	0.116	70	0.032	35	0.039
	37	seed837284	650	0.296	160	0.119	10	0.487
	37	seed860912	750	0.059	120	0.389	35	0.336
	37	seed914634	500	0.095	70	0.36	40	0.461
	37	seed923422	500	0.337	180	0.066	25	0.021
	37	seed923422	700	0.337	150	0.184	20	0.275
	37	seed9496	500	0.129	60	0.235	10	0.337
	37	seed992113	300	0.356	90	0.024	40	0.037
	37	seed992113	450	0.356	180	0.437	30	0.431
	37	seed992113	600	0.356	200	0.4	25	0.403
	38	seed113704	250	0.046	200	0.126	45	0.269
	38	seed159043	400	0.358	150	0.277	15	0.018
	38	seed159043	450	0.358	70	0.327	35	0.05
	38	seed181091	300	0.3	90	0.338	45	0.068
	38	seed186720	300	0.106	180	0.057	40	0.465
	38	seed201241	300	0.137	50	0.106	20	0.043
	38	seed218795	200	0.194	140	0.036	20	0.247
	38	seed232222	650	0.008	100	0.447	45	0.197
	38	seed232549	500	0.301	120	0.295	35	0.385
	38	seed258801	350	0.294	100	0.18	30	0.497
	38	seed265179	250	0.009	160	0.023	20	0.161
	38	seed266817	600	0.026	80	0.075	40	0.382
	38	seed282731	700	0.023	170	0.412	20	0.462
	38	seed286219	650	0.327	50	0.151	20	0.476
	38	seed292312	350	0.184	170	0.131	45	0.178
	38	seed292312	400	0.184	70	0.134	45	0.134
	38	seed302688	250	0.038	90	0.412	35	0.405
	38	seed304663	550	0.101	150	0.147	15	0.46
	38	seed316607	600	0.073	80	0.31	35	0.258
	38	seed39995	550	0.407	180	0.313	45	0.172
	38	seed39995	600	0.407	170	0.416	50	0.365
	38	seed45769	650	0.014	50	0.498	50	0.085
	38	seed45769	750	0.014	50	0.023	40	0.466
	38	seed507291	250	0.237	110	0.5	45	0.265
	38	seed507291	300	0.237	60	0.438	45	0.063
	38	seed514247	750	0.22	200	0.347	15	0.484
	38	seed525684	600	0.316	80	0.012	45	0.432
	38	seed544969	750	0.217	140	0.193	35	0.221
	38	seed609274	400	0.2	70	0.139	15	0.052
	38	seed622299	550	0.102	180	0.238	30	0.288
	38	seed623378	400	0.484	100	0.302	40	0.175
	38	seed640308	400	0.386	100	0.171	45	0.471
	38	seed666079	200	0.431	190	0.348	10	0.274
	38	seed693585	600	0.302	120	0.42	35	0.256
	38	seed759645	600	0.074	190	0.253	10	0.406
	38	seed807321	300	0.347	80	0.429	50	0.052
	38	seed810579	500	0.249	180	0.33	20	0.39
	38	seed831322	500	0.171	60	0.431	20	0.097
	38	seed837284	450	0.008	120	0.261	40	0.305
	38	seed860912	600	0.417	190	0.347	15	0.091
	38	seed914634	650	0.386	180	0.374	10	0.315
	38	seed923422	500	0.34	140	0.339	10	0.304
	38	seed923422	550	0.34	130	0.187	35	0.348
	38	seed9496	200	0.302	60	0.19	30	0.432
	38	seed992113	750	0.208	160	0.314	10	0.092
	38	seed992113	750	0.208	200	0.281	25	0.216
	38	seed992113	750	0.208	70	0.426	45	0.492
	39	seed113704	350	0.03	160	0.152	10	0.21
	39	seed159043	650	0.189	150	0.351	20	0.29
	39	seed181091	700	0.216	120	0.309	30	0.471
	39	seed186720	500	0.253	170	0.181	25	0.479
	39	seed201241	450	0.185	180	0.269	50	0.061
	39	seed218795	200	0.043	70	0.05	30	0.299
	39	seed232222	500	0.422	170	0.267	30	0.221
	39	seed232549	400	0.094	50	0.22	30	0.443
	39	seed258801	750	0.354	90	0.089	25	0.469
	39	seed265179	500	0.373	60	0.123	35	0.408
	39	seed266817	700	0.366	110	0.361	30	0.226
	39	seed282731	550	0.314	170	0.292	10	0.334
	39	seed286219	750	0.308	160	0.376	30	0.451
	39	seed292312	400	0.489	120	0.326	15	0.416
	39	seed302688	450	0.168	90	0.011	15	0.333
	39	seed304663	350	0.037	120	0.103	50	0.346
	39	seed316607	750	0.278	90	0.087	20	0.116
	39	seed39995	250	0.456	140	0.135	30	0.469
	39	seed39995	600	0.456	60	0.174	35	0.173
	39	seed45769	250	0.337	190	0.452	25	0.404
	39	seed45769	550	0.337	120	0.431	45	0.474
	39	seed507291	450	0.217	50	0.286	30	0.463
	39	seed514247	750	0.497	190	0.339	15	0.221
	39	seed525684	550	0.449	170	0.155	15	0.221
	39	seed544969	650	0.135	90	0.375	50	0.464
	39	seed609274	250	0.22	100	0.133	35	0.289
	39	seed622299	750	0.239	80	0.041	25	0.178
	39	seed623378	700	0.27	80	0.049	10	0.484
	39	seed640308	200	0.089	150	0.494	50	0.227
	39	seed666079	700	0.344	150	0.165	40	0.345
	39	seed693585	250	0.26	120	0.411	45	0.282
	39	seed759645	300	0.319	200	0.289	45	0.088
	39	seed807321	650	0.441	180	0.074	25	0.096
	39	seed810579	350	0.317	160	0.179	30	0.057
	39	seed831322	650	0.434	100	0.434	50	0.261
	39	seed860912	700	0.13	180	0.456	45	0.194
	39	seed914634	750	0.416	100	0.308	10	0.284
	39	seed923422	250	0.116	190	0.306	30	0.356
	39	seed923422	700	0.116	80	0.427	10	0.012
	39	seed9496	400	0.442	80	0.463	40	0.1
	39	seed992113	350	0.497	60	0.282	25	0.072
	39	seed992113	350	0.497	70	0.008	20	0.191
	4	seed113704	300	0.035	70	0.299	50	0.133
	4	seed159043	350	0.283	140	0.28	15	0.19
	4	seed159043	600	0.283	140	0.054	30	0.397
	4	seed181091	700	0.123	60	0.219	30	0.408
	4	seed186720	700	0.358	100	0.38	20	0.014
	4	seed201241	550	0.336	80	0.227	30	0.47
	4	seed218795	600	0.412	100	0.099	50	0.278
	4	seed232222	750	0.373	180	0.071	40	0.132
	4	seed232549	700	0.459	170	0.057	15	0.435
	4	seed258801	400	0.433	90	0.367	40	0.368
	4	seed265179	550	0.11	70	0.063	20	0.278
	4	seed266817	350	0.282	200	0.038	45	0.253
	4	seed282731	400	0.22	100	0.051	45	0.321
	4	seed286219	500	0.385	170	0.013	10	0.29
	4	seed292312	550	0.294	160	0.354	30	0.096
	4	seed292312	600	0.294	180	0.393	10	0.16
	4	seed302688	200	0.314	160	0.414	10	0.023
	4	seed304663	450	0.454	70	0.002	10	0.259
	4	seed316607	250	0.407	190	0.15	30	0.45
	4	seed39995	250	0.154	80	0.212	10	0.466
	4	seed39995	500	0.154	60	0.439	15	0.364
	4	seed456078	650	0.36	90	0.257	30	0.105
	4	seed456078	750	0.36	90	0.388	35	0.038
	4	seed45769	350	0.319	110	0.121	45	0.206
	4	seed45769	650	0.319	110	0.347	25	0.115
	4	seed507291	700	0.116	60	0.171	50	0.462
	4	seed507291	750	0.116	50	0.025	40	0.44
	4	seed514247	600	0.454	160	0.001	15	0.161
	4	seed525684	650	0.06	70	0.075	15	0.374
	4	seed544969	450	0.457	100	0.155	20	0.106
	4	seed609274	650	0.444	200	0.14	35	0.344
	4	seed622299	750	0.014	160	0.266	50	0.113
	4	seed623378	450	0.16	50	0.378	40	0.415
	4	seed640308	300	0.157	100	0.044	45	0.126
	4	seed666079	550	0.104	170	0.234	25	0.19
	4	seed693585	600	0.418	180	0.378	50	0.467
	4	seed759645	500	0.028	120	0.038	50	0.225
	4	seed807321	450	0.267	120	0.093	10	0.224
	4	seed810579	250	0.224	60	0.443	15	0.211
	4	seed831322	400	0.156	90	0.293	20	0.207
	4	seed837284	450	0.147	50	0.41	15	0.285
	4	seed837284	700	0.147	130	0.261	45	0.228
	4	seed860912	700	0.489	130	0.343	25	0.233
	4	seed914634	350	0.153	50	0.067	25	0.469
	4	seed923422	400	0.086	70	0.283	15	0.434
	4	seed923422	450	0.086	190	0.181	40	0.282
	4	seed9496	600	0.185	50	0.092	35	0.472
	4	seed9496	600	0.185	70	0.115	15	0.264
	4	seed992113	200	0.205	140	0.368	20	0.362
	4	seed992113	400	0.205	120	0.346	15	0.497
	40	seed113704	750	0.438	130	0.488	10	0.452
	40	seed159043	250	0.036	150	0.009	30	0.252
	40	seed181091	600	0.269	150	0.384	45	0.402
	40	seed186720	250	0.081	80	0.01	25	0.349
	40	seed201241	650	0.499	130	0.321	45	0.071
	40	seed218795	300	0.013	110	0.445	25	0.297
	40	seed232222	700	0.328	170	0.021	50	0.199
	40	seed232549	550	0.489	140	0.463	40	0.143
	40	seed258801	750	0.243	60	0.167	35	0.058
	40	seed265179	550	0.269	180	0.313	50	0.486
	40	seed266817	700	0.26	80	0.077	50	0.047
	40	seed282731	350	0.047	80	0.386	40	0.053
	40	seed286219	200	0.192	60	0.267	40	0.441
	40	seed292312	300	0.455	100	0.008	50	0.458
	40	seed302688	500	0.278	160	0.077	15	0.303
	40	seed304663	250	0.165	90	0.179	50	0.486
	40	seed316607	400	0.201	180	0.258	10	0.307
	40	seed39995	450	0.061	110	0.485	40	0.405
	40	seed39995	500	0.061	180	0.27	25	0.413
	40	seed45769	250	0.39	80	0.204	25	0.171
	40	seed45769	600	0.39	60	0.206	25	0.014
	40	seed507291	450	0.161	60	0.275	30	0.434
	40	seed514247	250	0.16	110	0.466	10	0.139
	40	seed525684	200	0.05	130	0.093	30	0.233
	40	seed544969	350	0.468	160	0.095	50	0.396
	40	seed609274	450	0.086	50	0.125	50	0.154
	40	seed622299	250	0.056	160	0.212	15	0.333
	40	seed623378	500	0.422	130	0.145	25	0.089
	40	seed640308	350	0.385	150	0.123	35	0.113
	40	seed666079	300	0.002	50	0.404	25	0.069
	40	seed693585	250	0.458	200	0.112	25	0.206
	40	seed759645	450	0.483	70	0.263	35	0.3
	40	seed807321	650	0.305	50	0.227	20	0.266
	40	seed810579	500	0.338	80	0.312	45	0.39
	40	seed831322	650	0.171	110	0.317	40	0.071
	40	seed860912	250	0.445	60	0.159	50	0.493
	40	seed914634	350	0.458	180	0.072	10	0.166
	40	seed923422	450	0.055	60	0.034	10	0.139
	40	seed923422	700	0.055	160	0.279	15	0.11
	40	seed9496	300	0.294	120	0.186	10	0.146
	40	seed992113	200	0.265	70	0.146	15	0.379
	40	seed992113	250	0.265	80	0.247	15	0.356
	41	seed113704	400	0.231	80	0.481	10	0.097
	41	seed159043	350	0.498	70	0.12	45	0.172
	41	seed181091	550	0.113	200	0.455	25	0.385
	41	seed186720	350	0.155	60	0.269	50	0.105
	41	seed201241	550	0.093	80	0.089	35	0.2
	41	seed218795	600	0.24	190	0.396	25	0.286
	41	seed232222	300	0.021	200	0.087	15	0.044
	41	seed232549	450	0.229	120	0.42	50	0.089
	41	seed258801	650	0.486	130	0.228	10	0.097
	41	seed265179	300	0.287	190	0.012	50	0.144
	41	seed266817	600	0.217	160	0.18	25	0.052
	41	seed282731	750	0.168	180	0.442	25	0.342
	41	seed286219	350	0.436	50	0.416	15	0.212
	41	seed292312	400	0.259	110	0.391	50	0.133
	41	seed302688	600	0.282	180	0.499	25	0.243
	41	seed304663	650	0.225	180	0.086	20	0.223
	41	seed316607	400	0.401	50	0.282	40	0.012
	41	seed39995	650	0.081	140	0.428	10	0.023
	41	seed456078	600	0.04	80	0.122	30	0.037
	41	seed45769	400	0.371	80	0.211	25	0.018
	41	seed45769	450	0.371	140	0.076	45	0.113
	41	seed507291	250	0.496	50	0.475	35	0.052
	41	seed514247	550	0.069	200	0.272	20	0.354
	41	seed525684	600	0.045	100	0.01	50	0.474
	41	seed544969	700	0.392	90	0.204	40	0.063
	41	seed609274	200	0.137	90	0.099	35	0.342
	41	seed622299	500	0.255	60	0.203	10	0.335
	41	seed623378	500	0.173	90	0.076	35	0.173
	41	seed640308	350	0.055	200	0.137	20	0.459
	41	seed666079	700	0.237	150	0.268	10	0.414
	41	seed693585	200	0.107	90	0.038	25	0.014
	41	seed759645	450	0.063	120	0.106	50	0.203
	41	seed807321	450	0.083	80	0.239	20	0.315
	41	seed810579	300	0.407	120	0.174	25	0.076
	41	seed831322	750	0.492	200	0.075	20	0.418
	41	seed860912	550	0.009	130	0.281	10	0.485
	41	seed914634	400	0.299	150	0.352	10	0.31
	41	seed923422	300	0.168	60	0.409	30	0.292
	41	seed923422	750	0.168	100	0.458	20	0.455
	41	seed9496	550	0.481	50	0.191	25	0.361
	41	seed992113	250	0.209	190	0.152	10	0.203
	41	seed992113	650	0.209	180	0.053	40	0.052
	42	seed113704	200	0.027	80	0.386	10	0.139
	42	seed159043	500	0.28	170	0.469	40	0.241
	42	seed181091	700	0.361	180	0.213	30	0.461
	42	seed186720	600	0.211	140	0.386	20	0.281
	42	seed201241	700	0.468	50	0.308	15	0.075
	42	seed218795	600	0.355	150	0.438	10	0.004
	42	seed232222	350	0.186	120	0.31	10	0.266
	42	seed232549	200	0.121	130	0.374	35	0.031
	42	seed258801	300	0.328	100	0.04	15	0.111
	42	seed265179	750	0.398	110	0.475	25	0.45
	42	seed266817	550	0.413	90	0.235	45	0.487
	42	seed282731	650	0.428	50	0.422	15	0.246
	42	seed286219	200	0.218	150	0.219	50	0.256
	42	seed292312	400	0.354	170	0.064	35	0.24
	42	seed302688	750	0.129	190	0.434	45	0.047
	42	seed304663	650	0.346	50	0.265	15	0.003
	42	seed316607	200	0.407	200	0.154	15	0.173
	42	seed39995	500	0.471	120	0.158	30	0.164
	42	seed456078	700	0.096	70	0.479	40	0.237
	42	seed45769	300	0.465	110	0.055	30	0.096
	42	seed45769	750	0.465	180	0.069	45	0.266
	42	seed507291	600	0.025	100	0.001	15	0.336
	42	seed514247	250	0.309	50	0.051	15	0.036
	42	seed525684	700	0.113	90	0.24	30	0.346
	42	seed544969	600	0.017	120	0.085	15	0.14
	42	seed609274	200	0.141	80	0.334	50	0.411
	42	seed622299	400	0.097	110	0.043	10	0.327
	42	seed623378	600	0.047	140	0.251	35	0.091
	42	seed640308	400	0.251	200	0.367	10	0.174
	42	seed666079	650	0.247	110	0.029	50	0.012
	42	seed693585	600	0.197	180	0.394	40	0.082
	42	seed759645	550	0.419	200	0.448	25	0.237
	42	seed807321	450	0.288	140	0.407	40	0.339
	42	seed810579	650	0.432	50	0.106	25	0.011
	42	seed831322	750	0.291	50	0.453	30	0.46
	42	seed837284	550	0.261	130	0.072	40	0.417
	42	seed860912	250	0.209	170	0.121	30	0.411
	42	seed914634	600	0.036	120	0.428	30	0.127
	42	seed923422	350	0.449	170	0.25	35	0.312
	42	seed923422	650	0.449	190	0.434	20	0.487
	42	seed9496	650	0.466	80	0.375	45	0.256
	42	seed992113	300	0.346	190	0.272	40	0.457
	42	seed992113	600	0.346	50	0.4	45	0.131
	43	seed113704	400	0.099	140	0.061	30	0.421
	43	seed159043	600	0.09	80	0.083	30	0.341
	43	seed181091	750	0.105	120	0.303	45	0.292
	43	seed186720	500	0.208	130	0.249	15	0.478
	43	seed201241	550	0.431	200	0.379	40	0.261
	43	seed218795	350	0.381	180	0.436	20	0.02
	43	seed232222	300	0.353	80	0.296	35	0.308
	43	seed232549	450	0.188	170	0.133	45	0.119
	43	seed258801	650	0.394	80	0.186	45	0.43
	43	seed265179	250	0.366	160	0.171	40	0.49
	43	seed266817	350	0.044	60	0.202	40	0.001
	43	seed282731	500	0.067	60	0.015	35	0.226
	43	seed286219	300	0.294	120	0.341	30	0.136
	43	seed292312	350	0.298	90	0.285	15	0.391
	43	seed302688	500	0.226	120	0.41	50	0.268
	43	seed304663	700	0.281	200	0.195	35	0.46
	43	seed316607	350	0.184	200	0.192	15	0.437
	43	seed39995	500	0.149	120	0.285	15	0.32
	43	seed456078	550	0.077	130	0.109	30	0.373
	43	seed45769	550	0.404	180	0.005	50	0.27
	43	seed45769	650	0.404	130	0.328	45	0.197
	43	seed507291	350	0.164	160	0.355	15	0.083
	43	seed514247	650	0.044	60	0.146	30	0.292
	43	seed525684	250	0.249	200	0.096	30	0.124
	43	seed544969	750	0.422	130	0.475	50	0.245
	43	seed609274	550	0.306	60	0.481	15	0.409
	43	seed622299	400	0.36	50	0.265	40	0.174
	43	seed623378	250	0.043	160	0.021	35	0.105
	43	seed640308	550	0.339	140	0.066	40	0.149
	43	seed666079	600	0.281	70	0.403	15	0.116
	43	seed693585	500	0.129	170	0.348	30	0.265
	43	seed759645	700	0.021	60	0.428	35	0.013
	43	seed807321	250	0.232	150	0.465	25	0.22
	43	seed810579	550	0.349	100	0.34	10	0.11
	43	seed831322	350	0.31	180	0.235	25	0.41
	43	seed837284	650	0.098	200	0.435	10	0.416
	43	seed860912	300	0.42	180	0.284	20	0.074
	43	seed914634	200	0.107	80	0.284	35	0.344
	43	seed923422	250	0.31	90	0.085	50	0.116
	43	seed923422	500	0.31	100	0.184	50	0.328
	43	seed9496	350	0.287	200	0.423	25	0.103
	43	seed992113	500	0.299	120	0.252	40	0.236
	43	seed992113	600	0.299	180	0.314	40	0.095
	44	seed113704	500	0.062	160	0.498	15	0.441
	44	seed159043	250	0.143	180	0.402	30	0.392
	44	seed181091	550	0.112	200	0.143	35	0.498
	44	seed186720	600	0.298	80	0.159	40	0.401
	44	seed201241	500	0.309	60	0.319	40	0.435
	44	seed218795	300	0.216	120	0.125	45	0.234
	44	seed232222	750	0.326	110	0.279	45	0.173
	44	seed232549	450	0.32	150	0.261	25	0.11
	44	seed258801	450	0.125	140	0.217	10	0.428
	44	seed265179	650	0.054	60	0.009	35	0.132
	44	seed266817	250	0.446	100	0.181	30	0.221
	44	seed282731	600	0.11	140	0.07	40	0.294
	44	seed286219	350	0.146	120	0.19	25	0.022
	44	seed292312	450	0.155	80	0.092	35	0.075
	44	seed302688	300	0.455	80	0.349	30	0.134
	44	seed304663	650	0.022	170	0.028	30	0.421
	44	seed316607	650	0.074	180	0.429	35	0.414
	44	seed39995	300	0.439	150	0.485	20	0.214
	44	seed456078	400	0.349	100	0.174	35	0.398
	44	seed45769	250	0.182	90	0.337	10	0.092
	44	seed507291	650	0.486	90	0.38	30	0.174
	44	seed514247	750	0.188	190	0.221	30	0.209
	44	seed525684	250	0.062	70	0.038	10	0.05
	44	seed544969	650	0.246	150	0.226	15	0.197
	44	seed609274	650	0.34	50	0.458	35	0.372
	44	seed622299	700	0.281	100	0.147	20	0.002
	44	seed623378	350	0.005	70	0.248	10	0.012
	44	seed640308	500	0.14	170	0.435	40	0.343
	44	seed666079	250	0.477	170	0.272	30	0.081
	44	seed693585	250	0.037	120	0.431	40	0.344
	44	seed759645	550	0.336	60	0.48	30	0.125
	44	seed807321	600	0.353	50	0.088	20	0.388
	44	seed810579	400	0.08	90	0.04	30	0.25
	44	seed831322	200	0.09	90	0.483	40	0.307
	44	seed837284	650	0.256	50	0.363	40	0.334
	44	seed860912	400	0.413	190	0.211	40	0.413
	44	seed914634	450	0.033	100	0.217	30	0.263
	44	seed923422	400	0.076	100	0.179	50	0.246
	44	seed923422	400	0.076	100	0.187	30	0.42
	44	seed9496	400	0.248	70	0.389	50	0.208
	44	seed992113	250	0.329	110	0.048	20	0.275
	44	seed992113	600	0.329	130	0.008	30	0.322
	45	seed113704	250	0.128	180	0.474	25	0.16
	45	seed159043	400	0.136	50	0.064	20	0.401
	45	seed181091	200	0.018	130	0.314	20	0.092
	45	seed186720	250	0.036	190	0.288	45	0.348
	45	seed201241	200	0.44	130	0.345	50	0.054
	45	seed218795	250	0.044	70	0.268	20	0.074
	45	seed232222	400	0.333	150	0.132	30	0.409
	45	seed232549	400	0.091	200	0.225	30	0.473
	45	seed258801	300	0.325	170	0.131	25	0.432
	45	seed265179	350	0.211	60	0.438	20	0.284
	45	seed266817	550	0.38	60	0.29	10	0.192
	45	seed282731	550	0.327	70	0.316	20	0.264
	45	seed286219	350	0.215	70	0.294	25	0.245
	45	seed292312	300	0.124	200	0.032	35	0.345
	45	seed302688	400	0.463	130	0.21	15	0.475
	45	seed304663	550	0.133	190	0.168	20	0.028
	45	seed316607	650	0.166	160	0.132	15	0.366
	45	seed39995	700	0.131	140	0.452	20	0.066
	45	seed456078	300	0.475	140	0.431	25	0.097
	45	seed45769	300	0.11	180	0.347	45	0.065
	45	seed507291	700	0.329	180	0.083	50	0.118
	45	seed514247	750	0.087	100	0.038	10	0.459
	45	seed525684	500	0.342	100	0.171	30	0.41
	45	seed544969	200	0.197	150	0.05	15	0.473
	45	seed609274	500	0.001	160	0.401	40	0.33
	45	seed622299	400	0.235	200	0.347	25	0.166
	45	seed623378	550	0.354	170	0.474	40	0.467
	45	seed640308	350	0.489	70	0.09	30	0.497
	45	seed666079	350	0.409	120	0.088	30	0.269
	45	seed693585	300	0.094	160	0.499	40	0.315
	45	seed759645	250	0.011	110	0.499	40	0.32
	45	seed807321	350	0.125	130	0.442	35	0.149
	45	seed810579	400	0.435	80	0.175	35	0.185
	45	seed831322	450	0.016	150	0.198	40	0.26
	45	seed837284	750	0.371	200	0.07	45	0.036
	45	seed860912	200	0.468	150	0.393	35	0.149
	45	seed914634	700	0.093	50	0.354	50	0.106
	45	seed923422	650	0.133	150	0.476	40	0.246
	45	seed9496	550	0.379	50	0.264	20	0.483
	45	seed992113	350	0.354	160	0.486	25	0.016
	45	seed992113	500	0.354	180	0.247	25	0.477
	46	seed113704	200	0.296	80	0.411	50	0.272
	46	seed159043	400	0.171	140	0.47	15	0.383
	46	seed181091	250	0.214	90	0.049	40	0.094
	46	seed186720	450	0.373	170	0.278	30	0.004
	46	seed201241	250	0.012	60	0.364	35	0.253
	46	seed218795	350	0.48	90	0.26	50	0.146
	46	seed232222	500	0.232	50	0.352	40	0.34
	46	seed232549	450	0.203	190	0.297	25	0.08
	46	seed258801	650	0.416	190	0.483	35	0.076
	46	seed265179	700	0.442	150	0.367	15	0.129
	46	seed266817	700	0.126	160	0.195	20	0.29
	46	seed282731	400	0.055	90	0.2	30	0.135
	46	seed286219	650	0.386	110	0.207	20	0.101
	46	seed292312	550	0.337	70	0.355	50	0.002
	46	seed302688	750	0.334	160	0.417	10	0.069
	46	seed304663	550	0.116	100	0.437	35	0.232
	46	seed316607	400	0.43	150	0.226	10	0.206
	46	seed39995	600	0.439	110	0.476	15	0.164
	46	seed456078	200	0.108	140	0.499	25	0.452
	46	seed45769	700	0.053	100	0.261	50	0.333
	46	seed507291	650	0.014	190	0.313	20	0.497
	46	seed514247	300	0.104	90	0.054	45	0.34
	46	seed525684	300	0.312	170	0.474	20	0.439
	46	seed544969	450	0.341	140	0.05	45	0.498
	46	seed609274	550	0.305	120	0.271	30	0.161
	46	seed622299	400	0.253	140	0.14	50	0.448
	46	seed623378	650	0.313	190	0.067	20	0.169
	46	seed640308	250	0.37	190	0.234	45	0.276
	46	seed666079	600	0.07	80	0.347	35	0.306
	46	seed693585	600	0.2	130	0.261	25	0.174
	46	seed759645	250	0.166	150	0.129	15	0.187
	46	seed807321	200	0.355	80	0.41	10	0.306
	46	seed810579	350	0.406	90	0.224	50	0.369
	46	seed831322	600	0.004	150	0.149	40	0.301
	46	seed837284	200	0.397	140	0.343	40	0.037
	46	seed860912	300	0.245	70	0.368	50	0.087
	46	seed914634	550	0.168	200	0.168	30	0.305
	46	seed923422	200	0.006	140	0.244	10	0.208
	46	seed9496	350	0.139	120	0.078	35	0.225
	46	seed992113	250	0.343	70	0.195	15	0.388
	47	seed113704	400	0.254	170	0.2	30	0.201
	47	seed159043	450	0.442	180	0.18	50	0.008
	47	seed181091	350	0.35	50	0.5	35	0.106
	47	seed186720	350	0.34	70	0.174	50	0.251
	47	seed201241	650	0.426	60	0.29	30	0.094
	47	seed218795	250	0.249	110	0.43	35	0.361
	47	seed232222	700	0.088	200	0.394	15	0.357
	47	seed232549	450	0.221	170	0.4	45	0.343
	47	seed258801	650	0.246	140	0.284	10	0.071
	47	seed265179	300	0.045	80	0.482	15	0.134
	47	seed266817	650	0.038	120	0.443	15	0.11
	47	seed282731	500	0.392	200	0.444	50	0.291
	47	seed286219	600	0.444	90	0.163	50	0.205
	47	seed292312	600	0.412	180	0.486	20	0.448
	47	seed302688	350	0.014	80	0.133	35	0.2
	47	seed304663	700	0.113	200	0.156	30	0.247
	47	seed316607	650	0.257	180	0.316	10	0.459
	47	seed39995	400	0.352	190	0.255	15	0.399
	47	seed456078	350	0.268	200	0.138	40	0.227
	47	seed45769	700	0.121	170	0.345	15	0.385
	47	seed507291	300	0.022	180	0.33	50	0.367
	47	seed514247	450	0.204	170	0.161	20	0.233
	47	seed525684	750	0.244	70	0.014	30	0.292
	47	seed544969	300	0.137	70	0.251	40	0.169
	47	seed609274	300	0.113	150	0.189	20	0.335
	47	seed622299	350	0.035	80	0.343	15	0.286
	47	seed623378	450	0.347	190	0.434	15	0.191
	47	seed640308	600	0.482	120	0.14	20	0.409
	47	seed666079	500	0.231	190	0.067	30	0.485
	47	seed693585	700	0.104	110	0.26	50	0.312
	47	seed759645	450	0.166	50	0.129	50	0.305
	47	seed807321	500	0.086	170	0.139	35	0.274
	47	seed810579	300	0.243	160	0.316	25	0.037
	47	seed831322	650	0.308	70	0.093	30	0.134
	47	seed837284	500	0.091	100	0.464	35	0.341
	47	seed860912	700	0.088	200	0.241	25	0.347
	47	seed914634	600	0.228	150	0.435	20	0.22
	47	seed923422	400	0.295	90	0.457	10	0.226
	47	seed9496	300	0.394	200	0.458	50	0.088
	47	seed992113	550	0.127	60	0.314	40	0.22
	48	seed113704	500	0.475	150	0.39	20	0.25
	48	seed159043	250	0.046	80	0.355	30	0.035
	48	seed181091	650	0.338	80	0.331	45	0.047
	48	seed186720	400	0.035	180	0.065	10	0.497
	48	seed201241	300	0.046	110	0.398	35	0.407
	48	seed218795	400	0.237	100	0.23	10	0.431
	48	seed232222	700	0.494	170	0.198	10	0.076
	48	seed232549	400	0.224	70	0.381	30	0.185
	48	seed258801	600	0.262	140	0.082	50	0.154
	48	seed265179	400	0.227	70	0.055	30	0.413
	48	seed266817	700	0.133	90	0.064	35	0.142
	48	seed282731	700	0.483	130	0.107	30	0.365
	48	seed286219	200	0.009	60	0.164	15	0.287
	48	seed292312	200	0.224	140	0.047	40	0.147
	48	seed302688	750	0.11	70	0.406	45	0.252
	48	seed304663	450	0.293	190	0.264	10	0.236
	48	seed316607	450	0.498	50	0.303	40	0.184
	48	seed39995	700	0.275	70	0.04	20	0.221
	48	seed456078	600	0.482	80	0.469	20	0.091
	48	seed45769	200	0.311	200	0.057	20	0.409
	48	seed507291	500	0.088	80	0.015	35	0.219
	48	seed514247	450	0.049	50	0.145	50	0.396
	48	seed525684	250	0.06	170	0.028	40	0.446
	48	seed544969	650	0.414	200	0.413	35	0.468
	48	seed609274	500	0.311	110	0.494	35	0.002
	48	seed622299	300	0.17	140	0.303	50	0.367
	48	seed623378	700	0.479	130	0.179	40	0.461
	48	seed640308	600	0.182	50	0.226	10	0.325
[truncated: 342 more rows]

## Sheet: Table S2D
	Table S2D. List of Parameters in SVM
	Listed are parameters for SVM models with protein interaction features
	Models	Gamma	C	Cross validation	Recall	Precision	F1-measure
	1	0.00012207	0.03125	10	0.508716	0.708781	0.592311
	2	0.00012207	0.125	10	0.522461	0.721695	0.606125
	3	0.00012207	0.5	10	0.499665	0.806766	0.61712
	4	0.00012207	128	10	0.516762	0.754528	0.61341
	5	0.00012207	2	10	0.53654	0.796863	0.64129
	6	0.00012207	32	10	0.535702	0.797206	0.640802
	7	0.000488281	0.03125	10	0.527321	0.708399	0.604593
	8	0.000488281	0.125	10	0.522628	0.755329	0.617793
	9	0.000488281	0.5	10	0.545592	0.764803	0.636862
	10	0.000488281	2	10	0.538217	0.785854	0.638878
	11	0.000488281	32	10	0.488267	0.662648	0.562247
	12	0.000488281	8	10	0.512739	0.722485	0.599804
	13	0.00195312	0.03125	10	0.610962	0.545577	0.576421
	14	0.00195312	0.125	10	0.570399	0.64147	0.603851
	15	0.00195312	0.5	10	0.543413	0.709409	0.615414
	16	0.00195312	2	10	0.534864	0.666736	0.593564
	17	0.00195312	8	10	0.548106	0.561759	0.554849
	18	0.0078125	0.03125	10	0.712538	0.373157	0.489803
	19	0.0078125	0.125	10	0.679014	0.404614	0.507072
	20	0.0078125	0.5	10	0.629735	0.442052	0.519461
	21	0.0078125	2	10	0.585149	0.479731	0.527222
	22	0.0078125	8	10	0.588334	0.431416	0.497802
	23	3.05176e-05	0.03125	10	0.483071	0.713366	0.576054
	24	3.05176e-05	0.125	10	0.506872	0.721202	0.595334
	25	3.05176e-05	0.5	10	0.524472	0.724977	0.608636
	26	3.05176e-05	2	10	0.520282	0.758924	0.617343
	27	3.05176e-05	512	10	0.538049	0.800698	0.643609
	28	3.05176e-05	8	10	0.544921	0.770197	0.638264
