# Supplementary material for: Identification of Protein Complexes by Integrating Protein Abundance and Interaction Features Using a Deep Learning Strategy
Source: Int J Mol Sci. 2023 Apr 26;24(9):7884. doi: 10.3390/ijms24097884 (PMC10178578; doi:10.3390/ijms24097884)
Supplement: Supplementary file 1 [file ijms-24-07884-s001.zip › Table S3.xlsx]

## Sheet: Table S3
	Table S3. Parameters of Two-stage Clustering
	List are parameters of ClusterOne and MCL that are used on different top percentages of interacting edges and corresponding results of k-clique method
		Parameters in ClusterOne		Parameter in MCL	Results of k-clique
	Number of top PPI edges	Density	Overlap	Inflation (-I)	Sensitivity	PPV	ACC	MMR	PWMMR	MMR_PWMMR_hmean	Precision measure	Recall measure	Precision Recall product	Clique Precision Mean	Recall Mean	F Grand K-Clique	Clique Weighted Precision Mean	Weighted Recall Mean	Clique Weighted mean F weighted K Clique
	107604	0.2	0.6	1.2	0.594939	0.14164	0.290288	0.210637	0.36285	0.266544	0.399849	0.255559	0.311821	0.318412	0.303833	0.302203	0.349775	0.386102	0.367042
	107604	0.2	0.6	10	0.428188	0.17584	0.274395	0.245122	0.374482	0.296298	0.390591	0.266718	0.316982	0.458129	0.478783	0.445283	0.486979	0.212831	0.296207
	107604	0.2	0.6	11	0.42601	0.175003	0.273044	0.246275	0.374183	0.297045	0.392172	0.268306	0.318624	0.45961	0.483717	0.451782	0.4429	0.253633	0.322552
	107604	0.2	0.6	13	0.424166	0.174585	0.272127	0.243606	0.369523	0.293635	0.385847	0.265639	0.314653	0.46004	0.481401	0.452916	0.452915	0.220758	0.296834
	107604	0.2	0.6	15	0.420647	0.1742	0.270697	0.24263	0.364652	0.291382	0.379551	0.262913	0.310645	0.462495	0.481077	0.453898	0.429942	0.20674	0.279217
	107604	0.2	0.6	2	0.574242	0.154572	0.297929	0.235018	0.413803	0.299778	0.453201	0.282436	0.347999	0.319714	0.305945	0.303835	0.412723	0.404658	0.408651
	107604	0.2	0.6	3	0.523211	0.165248	0.29404	0.239021	0.418296	0.304211	0.456807	0.282113	0.34881	0.46782	0.458032	0.456257	0.416222	0.369203	0.391305
	107604	0.2	0.6	4	0.487179	0.172856	0.290193	0.243282	0.405742	0.304179	0.441769	0.280333	0.343006	0.469475	0.489086	0.46177	0.487262	0.289155	0.362934
	107604	0.2	0.6	5	0.461287	0.175464	0.284498	0.246113	0.39671	0.303771	0.426657	0.278357	0.33691	0.462171	0.485993	0.458052	0.449164	0.266717	0.334691
	107604	0.2	0.6	6	0.44545	0.176755	0.280599	0.243992	0.387879	0.299553	0.412032	0.271456	0.327288	0.454039	0.481037	0.448456	0.424649	0.247153	0.312453
	107604	0.2	0.6	7	0.437741	0.177251	0.27855	0.243646	0.386272	0.298813	0.406924	0.268219	0.323324	0.454715	0.482443	0.448938	0.443005	0.249542	0.319252
	107604	0.2	0.6	8	0.431373	0.176133	0.275643	0.244759	0.381512	0.298205	0.399418	0.26783	0.320649	0.447452	0.474449	0.431843	0.504298	0.218408	0.304806
	107604	0.2	0.6	9	0.430199	0.17573	0.274952	0.244336	0.376928	0.296483	0.393632	0.267328	0.318412	0.445354	0.477301	0.43556	0.457627	0.213699	0.291347
	107604	0.2	0.7	1.2	0.594687	0.141177	0.289752	0.217185	0.372452	0.274376	0.413483	0.264421	0.322563	0.317306	0.306113	0.302756	0.344436	0.421384	0.379044
	107604	0.2	0.7	10	0.433635	0.173958	0.274653	0.249465	0.372427	0.29879	0.390982	0.272711	0.321308	0.456824	0.47967	0.445486	0.453573	0.23878	0.312858
	107604	0.2	0.7	11	0.430535	0.173259	0.273119	0.25088	0.372838	0.299936	0.392901	0.274336	0.323084	0.462295	0.4808	0.450372	0.50742	0.230736	0.317223
	107604	0.2	0.7	13	0.427937	0.172567	0.27175	0.248428	0.368965	0.29693	0.386658	0.271554	0.319042	0.460925	0.480237	0.452016	0.455023	0.223123	0.299423
	107604	0.2	0.7	15	0.426094	0.172147	0.270833	0.248037	0.363619	0.294907	0.378811	0.270182	0.315405	0.463884	0.48096	0.455033	0.445305	0.215225	0.290194
	107604	0.2	0.7	2	0.577007	0.152671	0.296803	0.239257	0.414755	0.30346	0.461738	0.287406	0.354288	0.319381	0.304392	0.303544	0.417712	0.410252	0.413948
	107604	0.2	0.7	3	0.527401	0.164591	0.294628	0.243064	0.42354	0.308871	0.469756	0.288219	0.357249	0.469592	0.456331	0.457111	0.44779	0.347527	0.391339
	107604	0.2	0.7	4	0.494386	0.169493	0.289473	0.249684	0.410286	0.310444	0.45595	0.287629	0.352738	0.468799	0.487173	0.463211	0.463931	0.318459	0.377671
	107604	0.2	0.7	5	0.469583	0.17167	0.283925	0.251542	0.396978	0.307952	0.435867	0.28471	0.344434	0.46788	0.489289	0.463344	0.475751	0.285742	0.357041
	107604	0.2	0.7	6	0.45341	0.173026	0.280092	0.25075	0.388317	0.304727	0.415799	0.278509	0.33358	0.46436	0.485042	0.455516	0.519111	0.2774	0.36158
	107604	0.2	0.7	7	0.444109	0.173715	0.277756	0.250125	0.386378	0.303668	0.408226	0.275476	0.328964	0.453319	0.479297	0.445418	0.457563	0.238846	0.313859
	107604	0.2	0.7	8	0.437741	0.173415	0.275519	0.250085	0.382397	0.302401	0.40183	0.274562	0.326223	0.439935	0.473192	0.428954	0.437537	0.234729	0.305542
	107604	0.2	0.7	9	0.436819	0.173712	0.275465	0.249302	0.374851	0.299449	0.394664	0.273996	0.323442	0.443164	0.472713	0.431463	0.455419	0.220355	0.297005
	107604	0.2	0.8	1.2	0.594436	0.138132	0.286549	0.221038	0.373866	0.277822	0.413556	0.269295	0.326187	0.321852	0.304503	0.303719	0.433333	0.396474	0.414085
	107604	0.2	0.8	10	0.436652	0.169462	0.272022	0.252135	0.371665	0.300448	0.388861	0.276634	0.323284	0.450177	0.476771	0.442425	0.42728	0.215296	0.286322
	107604	0.2	0.8	11	0.4364	0.168522	0.271188	0.251959	0.37086	0.30006	0.38991	0.277301	0.324103	0.457844	0.479169	0.447529	0.454503	0.207475	0.284898
	107604	0.2	0.8	13	0.433803	0.166877	0.269057	0.250089	0.368749	0.298043	0.384333	0.274796	0.320462	0.46048	0.479462	0.451042	0.443146	0.217329	0.291634
	107604	0.2	0.8	15	0.431792	0.166676	0.268271	0.249434	0.363909	0.295989	0.377861	0.273531	0.317341	0.466566	0.483321	0.457991	0.466783	0.234657	0.312312
	107604	0.2	0.8	2	0.577342	0.149148	0.293444	0.240925	0.411278	0.303853	0.458555	0.288944	0.354507	0.319422	0.306174	0.304553	0.404875	0.413442	0.409113
	107604	0.2	0.8	3	0.528155	0.161641	0.292184	0.243747	0.426887	0.31031	0.470246	0.288335	0.357479	0.46962	0.459059	0.458509	0.450824	0.354287	0.396768
	107604	0.2	0.8	4	0.504609	0.166471	0.289833	0.251071	0.410805	0.311664	0.454985	0.289954	0.354189	0.468167	0.487467	0.464509	0.479598	0.306703	0.374142
	107604	0.2	0.8	5	0.473772	0.166051	0.280483	0.251477	0.399787	0.308745	0.436414	0.286132	0.345645	0.472458	0.48633	0.462383	0.528057	0.271649	0.358747
	107604	0.2	0.8	6	0.457097	0.167705	0.276871	0.252557	0.391506	0.307043	0.419006	0.28098	0.336384	0.459971	0.490663	0.455964	0.479102	0.294422	0.364716
	107604	0.2	0.8	7	0.448048	0.168633	0.274874	0.25236	0.387655	0.305707	0.410082	0.278425	0.331666	0.456022	0.480676	0.447273	0.464292	0.243771	0.319691
	107604	0.2	0.8	8	0.442098	0.168187	0.272682	0.252717	0.385095	0.305169	0.404491	0.277491	0.329166	0.449351	0.480559	0.436519	0.497681	0.261927	0.34322
	107604	0.2	0.8	9	0.439501	0.168565	0.272184	0.251618	0.377419	0.301939	0.395656	0.276474	0.325498	0.444201	0.478535	0.43746	0.455701	0.237382	0.312157
	107604	0.25	0.6	1.2	0.594185	0.144398	0.292915	0.221916	0.368834	0.277106	0.417266	0.268149	0.326487	0.356663	0.343517	0.339583	0.374168	0.437021	0.40316
	107604	0.25	0.6	10	0.431624	0.176126	0.275717	0.246129	0.379522	0.298605	0.402334	0.272663	0.325043	0.460971	0.479913	0.4442	0.520946	0.228604	0.317765
	107604	0.25	0.6	11	0.430116	0.175533	0.274772	0.245636	0.378323	0.297871	0.402579	0.272189	0.324786	0.453646	0.478063	0.444306	0.441687	0.206185	0.281133
	107604	0.25	0.6	13	0.427602	0.174174	0.272905	0.244234	0.378345	0.296845	0.399364	0.270474	0.322519	0.456787	0.480105	0.449071	0.458849	0.221721	0.298974
	107604	0.25	0.6	15	0.420982	0.1744	0.27096	0.241563	0.374387	0.293654	0.394	0.266199	0.31773	0.459145	0.479031	0.448949	0.455235	0.211912	0.289201
	107604	0.25	0.6	2	0.577007	0.155536	0.299575	0.239029	0.404345	0.300448	0.462237	0.28951	0.35603	0.359197	0.345695	0.342966	0.436764	0.443265	0.43999
	107604	0.25	0.6	3	0.543908	0.165084	0.29965	0.245112	0.421481	0.309964	0.477301	0.293039	0.363132	0.383557	0.364226	0.36353	0.472903	0.39957	0.433154
	107604	0.25	0.6	4	0.492459	0.172258	0.291256	0.247118	0.414789	0.309716	0.458616	0.287269	0.353262	0.463071	0.48693	0.45859	0.450243	0.286475	0.350156
	107604	0.25	0.6	5	0.466147	0.174169	0.284936	0.247437	0.404419	0.307025	0.437713	0.283089	0.343817	0.462772	0.486182	0.458823	0.464605	0.279463	0.349
	107604	0.25	0.6	6	0.45274	0.173448	0.280226	0.24558	0.394785	0.3028	0.422293	0.276166	0.333944	0.457742	0.485168	0.453374	0.461624	0.263169	0.335227
	107604	0.25	0.6	7	0.447964	0.172287	0.27781	0.246531	0.391478	0.302539	0.416556	0.274306	0.330786	0.455102	0.482888	0.449194	0.47482	0.262434	0.338036
	107604	0.25	0.6	8	0.435981	0.173173	0.274773	0.24622	0.387325	0.301059	0.408698	0.273244	0.327519	0.453443	0.47329	0.434271	0.49439	0.206287	0.291107
	107604	0.25	0.6	9	0.433048	0.175621	0.275776	0.246119	0.381406	0.29918	0.403899	0.272808	0.325656	0.443624	0.476775	0.430801	0.476908	0.233254	0.313282
	107604	0.25	0.7	1.2	0.593766	0.144475	0.29289	0.226534	0.373682	0.282071	0.426619	0.274663	0.334177	0.354183	0.342475	0.338079	0.346139	0.426846	0.38228
	107604	0.25	0.7	10	0.433803	0.176174	0.27645	0.249197	0.37416	0.299153	0.398986	0.276004	0.326291	0.450265	0.478403	0.44109	0.464853	0.226038	0.304171
	107604	0.25	0.7	11	0.431456	0.176609	0.276042	0.248173	0.374921	0.298656	0.400481	0.27516	0.326198	0.461346	0.477685	0.44449	0.502823	0.217476	0.30363
	107604	0.25	0.7	13	0.430199	0.173715	0.273372	0.246845	0.374236	0.297476	0.397028	0.273416	0.323827	0.464208	0.479412	0.448662	0.495471	0.223483	0.308029
	107604	0.25	0.7	15	0.425758	0.173578	0.27185	0.244791	0.369304	0.294425	0.389781	0.270779	0.319561	0.465822	0.479881	0.450701	0.521451	0.238004	0.326832
	107604	0.25	0.7	2	0.578012	0.152901	0.297286	0.241849	0.403256	0.30236	0.463719	0.292591	0.358795	0.3578	0.339093	0.339705	0.420065	0.392465	0.405796
	107604	0.25	0.7	3	0.545668	0.164457	0.299564	0.247397	0.418482	0.310961	0.479722	0.295089	0.365407	0.382512	0.362436	0.362743	0.463136	0.373552	0.413548
	107604	0.25	0.7	4	0.498324	0.170864	0.291797	0.250846	0.416535	0.313123	0.466668	0.291291	0.35869	0.466662	0.487806	0.463472	0.449993	0.310118	0.367186
	107604	0.25	0.7	5	0.473186	0.17311	0.286205	0.251225	0.407012	0.310683	0.447938	0.287335	0.350097	0.465093	0.489132	0.46246	0.451198	0.305344	0.364212
	107604	0.25	0.7	6	0.459946	0.171554	0.280901	0.249634	0.395842	0.306179	0.427848	0.280816	0.339079	0.46089	0.487101	0.456552	0.472646	0.279244	0.351071
	107604	0.25	0.7	7	0.452991	0.172407	0.279462	0.249736	0.388837	0.304136	0.416801	0.278867	0.33416	0.459725	0.484857	0.45321	0.466492	0.270774	0.342655
	107604	0.25	0.7	8	0.440171	0.173889	0.27666	0.248549	0.385079	0.302105	0.409162	0.276954	0.33032	0.461828	0.479706	0.446115	0.510472	0.249059	0.334779
	107604	0.25	0.7	9	0.43749	0.175947	0.277444	0.248576	0.378262	0.300003	0.403346	0.275929	0.327687	0.448294	0.475783	0.437427	0.483502	0.231981	0.313532
	107604	0.25	0.8	1.2	0.593598	0.145466	0.293851	0.229577	0.374834	0.284751	0.426189	0.277657	0.336251	0.354783	0.343709	0.338838	0.349325	0.45373	0.394741
	107604	0.25	0.8	10	0.438411	0.177267	0.278776	0.252195	0.374592	0.301442	0.400893	0.280416	0.330002	0.449097	0.475378	0.436	0.456379	0.214058	0.291427
	107604	0.25	0.8	11	0.435897	0.177442	0.278112	0.251359	0.375357	0.301092	0.402022	0.279507	0.329752	0.454383	0.478416	0.444124	0.474667	0.220368	0.300996
	107604	0.25	0.8	13	0.434641	0.175819	0.276438	0.249476	0.375608	0.299816	0.40004	0.276743	0.32716	0.457272	0.478978	0.447442	0.460617	0.215367	0.293503
	107604	0.25	0.8	15	0.430451	0.175001	0.274462	0.248047	0.369897	0.296958	0.392175	0.274719	0.323104	0.457526	0.481408	0.448969	0.448771	0.220966	0.296125
	107604	0.25	0.8	2	0.578431	0.152436	0.296941	0.242761	0.402259	0.30279	0.459735	0.293121	0.357991	0.35766	0.34216	0.340754	0.417766	0.427429	0.422542
	107604	0.25	0.8	3	0.544076	0.164738	0.299382	0.246237	0.419071	0.310205	0.475715	0.293482	0.363012	0.381214	0.361303	0.360828	0.438568	0.365279	0.398583
	107604	0.25	0.8	4	0.500587	0.171793	0.293253	0.252632	0.418704	0.315127	0.466897	0.293953	0.36077	0.470298	0.489798	0.466573	0.498316	0.328328	0.395844
	107604	0.25	0.8	5	0.477962	0.174091	0.288459	0.25407	0.407379	0.312958	0.448215	0.291545	0.35329	0.469442	0.487029	0.462291	0.503335	0.286631	0.36526
	107604	0.25	0.8	6	0.464639	0.172851	0.283396	0.252655	0.396983	0.308787	0.429192	0.284902	0.342469	0.462865	0.48912	0.459556	0.475978	0.296701	0.365542
	107604	0.25	0.8	7	0.457516	0.173845	0.282023	0.252835	0.39037	0.306898	0.418637	0.283735	0.338231	0.464584	0.484443	0.455337	0.512077	0.265788	0.349943
	107604	0.25	0.8	8	0.444696	0.175711	0.279532	0.251381	0.387789	0.305029	0.4133	0.281504	0.334902	0.451143	0.479078	0.444093	0.45721	0.245295	0.31929
	107604	0.25	0.8	9	0.442014	0.176858	0.279596	0.251131	0.379383	0.302213	0.405597	0.280084	0.331353	0.452196	0.479983	0.44046	0.5034	0.271254	0.352543
	107604	0.3	0.6	1.2	0.585721	0.148518	0.294941	0.226058	0.379277	0.283276	0.432909	0.27538	0.336627	0.374128	0.35732	0.356	0.380708	0.412185	0.395822
	107604	0.3	0.6	10	0.428691	0.170643	0.270468	0.243076	0.38034	0.296596	0.40724	0.270078	0.324771	0.440539	0.47326	0.425911	0.476557	0.229086	0.309427
	107604	0.3	0.6	11	0.42601	0.170427	0.26945	0.242801	0.378902	0.295954	0.407855	0.269513	0.324557	0.449697	0.477883	0.433177	0.49261	0.224572	0.308503
	107604	0.3	0.6	13	0.42492	0.170594	0.269238	0.241346	0.375056	0.293699	0.403833	0.268022	0.322201	0.455705	0.475656	0.438739	0.5163	0.211831	0.300408
	107604	0.3	0.6	15	0.419055	0.171946	0.268431	0.239069	0.373583	0.291559	0.399039	0.264301	0.317986	0.464648	0.477818	0.445148	0.528588	0.21474	0.305408
	107604	0.3	0.6	2	0.571812	0.155995	0.298663	0.237125	0.404821	0.29907	0.464592	0.289062	0.356386	0.374598	0.35815	0.35672	0.422171	0.409985	0.415989
	107604	0.3	0.6	3	0.546757	0.161186	0.296867	0.24535	0.422007	0.310297	0.479136	0.29367	0.364148	0.386568	0.364845	0.36475	0.447552	0.341857	0.387629
	107604	0.3	0.6	4	0.491285	0.167427	0.286801	0.245226	0.408974	0.306607	0.455287	0.282234	0.348457	0.473419	0.489976	0.468028	0.521491	0.327242	0.402138
	107604	0.3	0.6	5	0.470588	0.169932	0.282786	0.244238	0.403072	0.304168	0.444834	0.278842	0.342801	0.466875	0.486351	0.460947	0.479228	0.28408	0.356709
	107604	0.3	0.6	6	0.452656	0.169849	0.277278	0.243903	0.394905	0.301557	0.4271	0.272372	0.332622	0.453536	0.48668	0.448888	0.454039	0.296054	0.358409
	107604	0.3	0.6	7	0.44235	0.169061	0.273467	0.242757	0.390002	0.299248	0.418241	0.270131	0.328252	0.450649	0.482493	0.440156	0.50596	0.265767	0.348485
	107604	0.3	0.6	8	0.434473	0.169784	0.2716	0.244463	0.388289	0.30003	0.413726	0.271242	0.327665	0.448607	0.473902	0.432271	0.520965	0.214646	0.304028
	107604	0.3	0.6	9	0.430786	0.169894	0.270533	0.243664	0.382682	0.297745	0.408818	0.270631	0.325673	0.44658	0.466979	0.419506	0.510365	0.197138	0.284415
	107604	0.3	0.7	1.2	0.58547	0.147189	0.293555	0.229597	0.381925	0.286788	0.436699	0.279533	0.340872	0.373275	0.359727	0.356061	0.383811	0.432761	0.406819
	107604	0.3	0.7	10	0.431959	0.1712	0.27194	0.247277	0.38427	0.300916	0.412906	0.27503	0.330151	0.446656	0.471333	0.424999	0.513933	0.211668	0.299843
	107604	0.3	0.7	11	0.42911	0.170165	0.270221	0.246204	0.382775	0.299663	0.413447	0.274147	0.329687	0.453349	0.47943	0.43661	0.529532	0.238366	0.328748
	107604	0.3	0.7	13	0.428691	0.170424	0.270295	0.245917	0.379054	0.298304	0.409179	0.272818	0.327366	0.458649	0.479704	0.44382	0.509252	0.248683	0.334177
	107604	0.3	0.7	15	0.424082	0.171627	0.269785	0.243749	0.375632	0.29565	0.403123	0.270136	0.323495	0.461186	0.476485	0.443394	0.525616	0.196376	0.285927
	107604	0.3	0.7	2	0.573571	0.15272	0.295966	0.240365	0.405599	0.301849	0.464378	0.291993	0.358542	0.372805	0.358196	0.35517	0.381568	0.413551	0.396916
	107604	0.3	0.7	3	0.547176	0.159148	0.295097	0.248413	0.421661	0.312641	0.479745	0.295956	0.366077	0.386934	0.367475	0.367093	0.450374	0.375197	0.409363
	107604	0.3	0.7	4	0.498408	0.1668	0.28833	0.249763	0.412992	0.311277	0.459499	0.289428	0.355153	0.468125	0.488174	0.465185	0.460825	0.306415	0.368082
	107604	0.3	0.7	5	0.477711	0.169107	0.284226	0.250298	0.407199	0.310028	0.450364	0.286677	0.350344	0.46611	0.491632	0.464507	0.443714	0.31781	0.370354
	107604	0.3	0.7	6	0.46003	0.168651	0.27854	0.247959	0.395593	0.304842	0.430347	0.277992	0.337785	0.458218	0.482872	0.448794	0.490295	0.252472	0.33331
	107604	0.3	0.7	7	0.447042	0.168653	0.274582	0.2463	0.392118	0.302556	0.422233	0.27543	0.333387	0.453975	0.477611	0.437687	0.523834	0.243175	0.332156
	107604	0.3	0.7	8	0.439417	0.17058	0.27378	0.246967	0.392006	0.303026	0.418871	0.275452	0.332349	0.447122	0.475623	0.429784	0.501865	0.22312	0.308906
	107604	0.3	0.7	9	0.435897	0.170962	0.272987	0.246663	0.387883	0.301559	0.41593	0.275183	0.331225	0.443107	0.47336	0.42495	0.507013	0.228253	0.31479
	107604	0.3	0.8	1.2	0.585302	0.142747	0.28905	0.23252	0.383019	0.289371	0.434657	0.28303	0.342826	0.372266	0.359923	0.355492	0.359163	0.443922	0.39707
	107604	0.3	0.8	10	0.442685	0.166782	0.27172	0.251336	0.386176	0.304496	0.415048	0.281365	0.335376	0.441967	0.47969	0.430057	0.49336	0.252731	0.334241
	107604	0.3	0.8	11	0.437908	0.165495	0.269206	0.250634	0.384789	0.303549	0.414807	0.27996	0.334298	0.448142	0.477155	0.434066	0.479667	0.236888	0.317149
	107604	0.3	0.8	13	0.437154	0.165791	0.269214	0.251556	0.380253	0.302797	0.410882	0.279014	0.332345	0.448333	0.478781	0.441312	0.453014	0.234227	0.308794
	107604	0.3	0.8	15	0.432127	0.166783	0.268461	0.249084	0.375835	0.299606	0.40405	0.275742	0.327787	0.460859	0.47505	0.441925	0.504908	0.201889	0.288443
	107604	0.3	0.8	2	0.573906	0.146722	0.290181	0.242724	0.403006	0.302973	0.45744	0.294674	0.358445	0.371593	0.359526	0.354304	0.366581	0.427817	0.394839
	107604	0.3	0.8	3	0.549941	0.154394	0.291389	0.251593	0.423301	0.315604	0.476347	0.301687	0.369412	0.388954	0.370327	0.368606	0.459994	0.390779	0.422571
	107604	0.3	0.8	4	0.506452	0.159878	0.284553	0.253485	0.413389	0.314266	0.454669	0.294257	0.357284	0.468465	0.487733	0.465198	0.453996	0.317588	0.373734
	107604	0.3	0.8	5	0.491453	0.162722	0.28279	0.252876	0.407002	0.31194	0.446348	0.290783	0.35215	0.467583	0.492937	0.464514	0.479925	0.335043	0.394606
	107604	0.3	0.8	6	0.471594	0.164735	0.278726	0.251256	0.39495	0.307126	0.427691	0.282579	0.340312	0.457516	0.490657	0.454584	0.481091	0.3186	0.383337
	107604	0.3	0.8	7	0.459527	0.165111	0.275451	0.251372	0.39374	0.306847	0.423208	0.281753	0.338288	0.448916	0.483365	0.441714	0.505313	0.289159	0.367831
	107604	0.3	0.8	8	0.451735	0.166676	0.274396	0.250502	0.393994	0.306275	0.420477	0.280604	0.336587	0.442409	0.472058	0.430205	0.464224	0.242739	0.318787
	107604	0.3	0.8	9	0.445115	0.167358	0.272935	0.250555	0.390942	0.305387	0.41905	0.280785	0.336259	0.437409	0.471339	0.420543	0.498312	0.226928	0.311844
	107604	0.35	0.6	1.2	0.58061	0.147932	0.293071	0.226637	0.388715	0.286331	0.444033	0.2772	0.341321	0.37946	0.364244	0.361369	0.399169	0.417807	0.408275
	107604	0.35	0.6	10	0.431792	0.172815	0.273167	0.245012	0.38497	0.299444	0.412216	0.274735	0.329718	0.43715	0.479861	0.422069	0.525166	0.256111	0.34431
	107604	0.35	0.6	11	0.427686	0.173003	0.272013	0.244399	0.383556	0.298559	0.412405	0.27414	0.32935	0.442874	0.469448	0.415916	0.527928	0.223014	0.313568
	107604	0.35	0.6	13	0.426429	0.173038	0.27164	0.242778	0.378934	0.295947	0.409052	0.272181	0.326867	0.453807	0.477719	0.43983	0.522625	0.224329	0.313915
	107604	0.35	0.6	15	0.420982	0.1734	0.270182	0.240674	0.377833	0.294046	0.405104	0.268049	0.322624	0.462312	0.476552	0.443098	0.517199	0.211674	0.300402
	107604	0.35	0.6	2	0.571309	0.152147	0.294827	0.234096	0.410491	0.298158	0.467724	0.287011	0.355732	0.380119	0.363365	0.361399	0.421875	0.403285	0.41237
	107604	0.35	0.6	3	0.548517	0.161206	0.297362	0.245845	0.423392	0.311067	0.481301	0.296497	0.366944	0.394004	0.375574	0.373973	0.444764	0.374708	0.406742
	107604	0.35	0.6	4	0.513407	0.163986	0.290158	0.247654	0.416401	0.310587	0.458683	0.29154	0.356493	0.472615	0.486424	0.464393	0.488076	0.319895	0.386482
	107604	0.35	0.6	5	0.487096	0.165074	0.283561	0.247291	0.407021	0.30766	0.446839	0.287141	0.349617	0.466532	0.48944	0.462844	0.47554	0.307288	0.373333
	107604	0.35	0.6	6	0.466147	0.16796	0.279811	0.2452	0.399657	0.303931	0.432846	0.280798	0.340625	0.459455	0.481485	0.448037	0.515222	0.265453	0.350382
	107604	0.35	0.6	7	0.450645	0.169324	0.276233	0.244828	0.392571	0.301577	0.421699	0.277735	0.334901	0.450559	0.477724	0.435968	0.495014	0.255529	0.337064
	107604	0.35	0.6	8	0.44059	0.171015	0.274495	0.246198	0.390996	0.302145	0.417033	0.278262	0.333799	0.449296	0.479573	0.436089	0.505072	0.238714	0.3242
	107604	0.35	0.6	9	0.438746	0.171953	0.27467	0.246454	0.387384	0.301252	0.413998	0.279082	0.333408	0.437751	0.472332	0.424625	0.493305	0.228222	0.312068
	107604	0.35	0.7	1.2	0.579772	0.148695	0.293614	0.230917	0.393033	0.290915	0.444761	0.281792	0.344999	0.380277	0.359566	0.360423	0.397691	0.359611	0.377694
	107604	0.35	0.7	10	0.439836	0.172421	0.275385	0.249095	0.385783	0.302725	0.414204	0.279107	0.333493	0.431228	0.46786	0.412373	0.485125	0.211035	0.294123
	107604	0.35	0.7	11	0.43573	0.172693	0.274312	0.24873	0.385912	0.302494	0.41534	0.278995	0.33378	0.435915	0.472685	0.420638	0.496855	0.217676	0.302726
	107604	0.35	0.7	13	0.434138	0.172425	0.273599	0.246836	0.379505	0.29912	0.409821	0.276461	0.330184	0.457346	0.483308	0.444189	0.536365	0.259231	0.34953
	107604	0.35	0.7	15	0.424753	0.17345	0.271428	0.244918	0.378915	0.297525	0.406558	0.272637	0.326394	0.46343	0.477839	0.445032	0.517472	0.213544	0.302327
	107604	0.35	0.7	2	0.571225	0.152007	0.29467	0.237667	0.411713	0.301367	0.465152	0.290398	0.357565	0.381961	0.361314	0.36141	0.433126	0.383924	0.407043
	107604	0.35	0.7	3	0.550863	0.159851	0.296742	0.249001	0.424401	0.313858	0.477377	0.29949	0.368067	0.394426	0.373443	0.374203	0.439538	0.37181	0.402847
	107604	0.35	0.7	4	0.517178	0.163014	0.290357	0.250429	0.417936	0.313192	0.457146	0.294735	0.358399	0.469811	0.489456	0.466091	0.475481	0.329367	0.389161
	107604	0.35	0.7	5	0.49204	0.163823	0.283915	0.251147	0.408837	0.311154	0.446195	0.29149	0.352621	0.466016	0.490148	0.464263	0.445264	0.321694	0.373525
	107604	0.35	0.7	6	0.473102	0.166271	0.28047	0.249778	0.401618	0.308001	0.432939	0.286203	0.344601	0.454176	0.488597	0.448916	0.480535	0.298446	0.368209
	107604	0.35	0.7	7	0.459108	0.168707	0.278307	0.24814	0.392427	0.304033	0.422089	0.281703	0.337895	0.450842	0.47657	0.43625	0.520902	0.253557	0.341085
	107604	0.35	0.7	8	0.449053	0.170702	0.276865	0.249934	0.391209	0.305007	0.418253	0.282537	0.337254	0.449076	0.475689	0.434283	0.509475	0.227825	0.314854
	107604	0.35	0.7	9	0.446791	0.171226	0.27659	0.2509	0.389862	0.305313	0.41684	0.283668	0.337595	0.438839	0.47146	0.422921	0.47789	0.218477	0.299865
	107604	0.35	0.8	1.2	0.579772	0.141599	0.286522	0.234482	0.394008	0.293999	0.442849	0.286105	0.347625	0.3837	0.366202	0.365191	0.455871	0.440339	0.44797
	107604	0.35	0.8	10	0.449388	0.16809	0.274841	0.253207	0.386367	0.305925	0.414972	0.283839	0.337102	0.433341	0.469305	0.411058	0.50515	0.233121	0.319018
	107604	0.35	0.8	11	0.442852	0.168449	0.273126	0.253116	0.386652	0.305948	0.416154	0.283678	0.337378	0.444568	0.470778	0.420868	0.542455	0.227975	0.321032
	107604	0.35	0.8	13	0.442601	0.168999	0.273494	0.251626	0.378881	0.302412	0.410014	0.282305	0.33438	0.455396	0.475112	0.436902	0.499787	0.216219	0.30185
	107604	0.35	0.8	15	0.436903	0.16961	0.272219	0.250479	0.376883	0.300946	0.406227	0.279646	0.331256	0.456011	0.479911	0.446448	0.474716	0.216173	0.297069
	107604	0.35	0.8	2	0.57156	0.144233	0.28712	0.239481	0.409592	0.302245	0.459489	0.292804	0.357681	0.382293	0.364522	0.362921	0.447391	0.420489	0.433523
	107604	0.35	0.8	3	0.556561	0.153642	0.292423	0.250841	0.422043	0.314663	0.470498	0.302414	0.368179	0.393964	0.373076	0.37354	0.429158	0.359332	0.391153
	107604	0.35	0.8	4	0.525138	0.157763	0.287832	0.253135	0.420186	0.315938	0.455475	0.298594	0.360715	0.468754	0.48659	0.463275	0.4858	0.312759	0.380531
	107604	0.35	0.8	5	0.499665	0.158527	0.281443	0.254041	0.411169	0.314048	0.44597	0.295762	0.355657	0.469057	0.487641	0.46265	0.491205	0.297229	0.370355
	107604	0.35	0.8	6	0.485336	0.160897	0.279444	0.251784	0.403677	0.310131	0.433374	0.289256	0.346944	0.455451	0.482845	0.447728	0.478554	0.272019	0.346871
	107604	0.35	0.8	7	0.46908	0.164379	0.277681	0.251968	0.393338	0.307168	0.422172	0.28664	0.341449	0.446689	0.476319	0.433702	0.511216	0.24433	0.330636
	107604	0.35	0.8	8	0.459444	0.166562	0.276633	0.253626	0.392572	0.308161	0.419968	0.287392	0.341256	0.435741	0.475585	0.429876	0.453884	0.241383	0.315159
	107604	0.35	0.8	9	0.456846	0.167946	0.276993	0.254037	0.391189	0.308037	0.418696	0.288077	0.341317	0.43583	0.472892	0.424439	0.467846	0.228475	0.307017
	107604	0.4	0.6	1.2	0.566114	0.15172	0.293072	0.226747	0.402919	0.290188	0.462512	0.279575	0.348495	0.377277	0.363174	0.359079	0.414947	0.431443	0.423034
	107604	0.4	0.6	10	0.43154	0.170967	0.271623	0.236929	0.39429	0.295995	0.422592	0.268917	0.328679	0.439936	0.471609	0.418028	0.539138	0.231048	0.323472
	107604	0.4	0.6	11	0.430116	0.171902	0.271915	0.236921	0.394579	0.29607	0.424773	0.269352	0.329662	0.448197	0.469148	0.425197	0.556818	0.217788	0.31311
	107604	0.4	0.6	13	0.422742	0.171743	0.269449	0.234388	0.393496	0.293783	0.422575	0.267741	0.327794	0.458241	0.47606	0.439415	0.53485	0.215844	0.307567
	107604	0.4	0.6	15	0.416792	0.172359	0.268026	0.232758	0.392479	0.292218	0.41824	0.264479	0.324045	0.462582	0.477296	0.444008	0.537932	0.215468	0.307691
	107604	0.4	0.6	2	0.558656	0.154135	0.293443	0.230711	0.414981	0.296552	0.476325	0.285149	0.356739	0.38156	0.360153	0.361183	0.4644	0.385968	0.421567
	107604	0.4	0.6	3	0.537205	0.158398	0.291705	0.23751	0.423718	0.304395	0.484857	0.289662	0.362662	0.392675	0.369864	0.371159	0.415731	0.342447	0.375547
	107604	0.4	0.6	4	0.49581	0.162285	0.283659	0.241712	0.422251	0.307436	0.465412	0.286399	0.354594	0.47185	0.497564	0.469963	0.496893	0.403852	0.445567
	107604	0.4	0.6	5	0.477208	0.164244	0.279962	0.242081	0.411195	0.304748	0.453329	0.281817	0.347566	0.467033	0.489976	0.464164	0.475528	0.310242	0.375501
	107604	0.4	0.6	6	0.465896	0.166033	0.278126	0.238861	0.405463	0.300623	0.43959	0.275955	0.339062	0.460475	0.485226	0.452464	0.523562	0.295702	0.377944
	107604	0.4	0.6	7	0.449556	0.167953	0.27478	0.237257	0.400542	0.297998	0.429875	0.270673	0.332184	0.44392	0.481083	0.437729	0.494442	0.284156	0.360902
	107604	0.4	0.6	8	0.440422	0.169341	0.273096	0.236963	0.399856	0.297576	0.426076	0.269422	0.330106	0.439747	0.475734	0.42976	0.477341	0.246437	0.325057
	107604	0.4	0.6	9	0.436316	0.170547	0.272786	0.235767	0.395162	0.29533	0.42281	0.268312	0.328292	0.433863	0.476619	0.424431	0.491951	0.249706	0.331267
	107604	0.4	0.7	1.2	0.565946	0.154147	0.295362	0.230169	0.406672	0.293961	0.460908	0.283062	0.350727	0.378203	0.363702	0.360813	0.415407	0.437403	0.426122
	107604	0.4	0.7	10	0.436149	0.171889	0.273805	0.242174	0.393108	0.299711	0.422326	0.273978	0.332349	0.439631	0.47693	0.425675	0.519883	0.248573	0.336334
	107604	0.4	0.7	11	0.435227	0.173008	0.274404	0.242984	0.393312	0.30039	0.423939	0.274777	0.333436	0.441719	0.478913	0.429614	0.493888	0.252207	0.333904
	107604	0.4	0.7	13	0.426931	0.172824	0.271632	0.239919	0.391222	0.297435	0.421212	0.272714	0.331074	0.456885	0.476431	0.43991	0.526627	0.218387	0.308742
	107604	0.4	0.7	15	0.423496	0.172872	0.270574	0.240567	0.390927	0.297846	0.418551	0.27112	0.329077	0.457383	0.478476	0.443943	0.512157	0.218991	0.306799
	107604	0.4	0.7	2	0.559159	0.156633	0.295944	0.233723	0.418052	0.299822	0.472676	0.287783	0.357753	0.378003	0.360579	0.358281	0.422362	0.392505	0.406887
	107604	0.4	0.7	3	0.54173	0.160052	0.294457	0.240078	0.422967	0.3063	0.478314	0.291755	0.362436	0.397613	0.378143	0.377647	0.499322	0.430891	0.46259
	107604	0.4	0.7	4	0.501592	0.163944	0.286763	0.245447	0.42016	0.309874	0.460967	0.290505	0.356402	0.468067	0.486757	0.463714	0.459503	0.31097	0.370919
	107604	0.4	0.7	5	0.482403	0.165395	0.282466	0.246104	0.409989	0.307578	0.449408	0.285678	0.349309	0.465848	0.484895	0.459625	0.473463	0.27491	0.347847
	107604	0.4	0.7	6	0.471929	0.166603	0.280401	0.243806	0.404657	0.304282	0.437591	0.28079	0.342078	0.45422	0.481002	0.446418	0.478584	0.261601	0.338288
	107604	0.4	0.7	7	0.45517	0.167827	0.276387	0.241212	0.398389	0.300488	0.427167	0.274428	0.334172	0.436625	0.483962	0.430235	0.45518	0.272885	0.34121
	107604	0.4	0.7	8	0.445869	0.16997	0.27529	0.241822	0.398452	0.300979	0.425013	0.274072	0.333247	0.443516	0.475601	0.432513	0.496337	0.239067	0.322701
	107604	0.4	0.7	9	0.441595	0.171398	0.275116	0.241238	0.394344	0.29935	0.423001	0.273522	0.332222	0.446133	0.47418	0.426169	0.529224	0.248012	0.337745
	107604	0.4	0.8	1.2	0.565862	0.148911	0.290281	0.23342	0.406117	0.296452	0.458961	0.287431	0.353486	0.37937	0.36116	0.360949	0.431848	0.417399	0.424501
	107604	0.4	0.8	10	0.447042	0.165397	0.271918	0.24707	0.392212	0.303164	0.420972	0.281173	0.337155	0.435673	0.473995	0.422302	0.506761	0.25146	0.336129
	107604	0.4	0.8	11	0.446288	0.166627	0.272697	0.248145	0.392226	0.303976	0.421842	0.282029	0.338049	0.446822	0.478064	0.434073	0.510644	0.252747	0.338133
	107604	0.4	0.8	13	0.442517	0.166737	0.271632	0.244453	0.389592	0.300411	0.418834	0.279198	0.335049	0.456757	0.477494	0.441399	0.516238	0.228337	0.316627
	107604	0.4	0.8	15	0.436735	0.166808	0.269909	0.245484	0.38803	0.30072	0.415405	0.278065	0.333135	0.466098	0.479711	0.446914	0.546662	0.226297	0.320089
	107604	0.4	0.8	2	0.560835	0.15075	0.290768	0.235962	0.41667	0.301298	0.46946	0.290768	0.359113	0.378376	0.361731	0.358866	0.42014	0.397743	0.408634
	107604	0.4	0.8	3	0.546841	0.154796	0.290945	0.242425	0.422285	0.308022	0.475334	0.295816	0.36468	0.396752	0.37442	0.37558	0.470678	0.372461	0.415849
	107604	0.4	0.8	4	0.510139	0.157611	0.283555	0.246992	0.418728	0.310709	0.456019	0.293501	0.357141	0.468541	0.491069	0.466681	0.463584	0.345889	0.39618
	107604	0.4	0.8	5	0.491621	0.159015	0.279598	0.249605	0.408267	0.309804	0.445603	0.291234	0.352248	0.462363	0.48928	0.461389	0.428637	0.31052	0.360141
	107604	0.4	0.8	6	0.480644	0.161034	0.278209	0.2472	0.403948	0.306707	0.436549	0.287142	0.346423	0.455563	0.488803	0.452767	0.474513	0.32336	0.384619
	107604	0.4	0.8	7	0.463968	0.161841	0.274024	0.244556	0.398006	0.302958	0.425393	0.280622	0.338164	0.443994	0.482648	0.43773	0.473154	0.286203	0.356665
	107604	0.4	0.8	8	0.45693	0.163645	0.273449	0.245778	0.397577	0.303769	0.424307	0.280408	0.337666	0.440752	0.482883	0.434574	0.454022	0.270008	0.338631
	107604	0.4	0.8	9	0.454332	0.164652	0.273509	0.245885	0.394241	0.302872	0.422429	0.280757	0.337321	0.433308	0.472112	0.423939	0.457476	0.232658	0.308448
	119560	0.2	0.6	1.2	0.595861	0.140045	0.288872	0.213601	0.363375	0.269049	0.399081	0.259774	0.3147	0.316377	0.304954	0.302072	0.324852	0.414329	0.364175
	119560	0.2	0.6	10	0.427853	0.172645	0.271784	0.247817	0.375651	0.298629	0.392774	0.271346	0.320959	0.455659	0.479743	0.443974	0.482941	0.21659	0.299058
	119560	0.2	0.6	11	0.427937	0.171061	0.270562	0.248006	0.37591	0.298848	0.391888	0.271332	0.320653	0.457969	0.478262	0.445788	0.456019	0.2036	0.281512
	119560	0.2	0.6	13	0.42492	0.170796	0.269397	0.245855	0.373649	0.296571	0.386855	0.268535	0.317015	0.459095	0.487013	0.453572	0.440008	0.240317	0.310856
	119560	0.2	0.6	15	0.424669	0.169482	0.26828	0.246603	0.372248	0.296671	0.383438	0.267657	0.315253	0.459564	0.482967	0.455359	0.408416	0.232192	0.296066
	119560	0.2	0.6	2	0.573152	0.153201	0.296323	0.234714	0.415022	0.299849	0.454245	0.281916	0.34791	0.318836	0.306046	0.304071	0.380492	0.414691	0.396856
	119560	0.2	0.6	3	0.528071	0.162339	0.292791	0.24068	0.421139	0.306306	0.460837	0.28407	0.35148	0.472335	0.467546	0.468214	0.472342	0.348525	0.401095
	119560	0.2	0.6	4	0.479722	0.169262	0.284954	0.245718	0.408484	0.306853	0.445286	0.278822	0.34292	0.467782	0.484997	0.464409	0.45731	0.289657	0.354669
	119560	0.2	0.6	5	0.466817	0.171472	0.282925	0.24688	0.403657	0.306377	0.43693	0.277038	0.33908	0.468898	0.486172	0.460666	0.472008	0.26384	0.338479
	119560	0.2	0.6	6	0.451818	0.17364	0.280096	0.246872	0.390433	0.302483	0.415992	0.273456	0.32999	0.45971	0.484215	0.453752	0.446479	0.251735	0.321948
	119560	0.2	0.6	7	0.444361	0.174601	0.278542	0.248501	0.387897	0.302932	0.407866	0.272437	0.326672	0.452714	0.477294	0.440624	0.472204	0.236425	0.315089
	119560	0.2	0.6	8	0.435981	0.173633	0.275138	0.249289	0.384802	0.302565	0.400567	0.272271	0.324188	0.447191	0.479684	0.440394	0.445054	0.241187	0.312839
	119560	0.2	0.6	9	0.433216	0.173184	0.273909	0.249546	0.381263	0.301653	0.396368	0.272012	0.322622	0.442835	0.474613	0.430769	0.4441	0.215632	0.290306
	119560	0.2	0.7	1.2	0.595609	0.141807	0.290623	0.218405	0.370094	0.2747	0.400902	0.264504	0.318723	0.316596	0.306128	0.301952	0.319309	0.425544	0.364851
	119560	0.2	0.7	10	0.430618	0.17175	0.271953	0.25125	0.375617	0.301097	0.392271	0.275745	0.323845	0.449853	0.477286	0.440949	0.437399	0.204998	0.27916
	119560	0.2	0.7	11	0.430367	0.170559	0.27093	0.251255	0.37609	0.301252	0.391362	0.27554	0.323394	0.459771	0.479218	0.447235	0.464694	0.213502	0.292579
	119560	0.2	0.7	13	0.427434	0.17067	0.270093	0.24893	0.374453	0.299054	0.387448	0.271937	0.319575	0.456316	0.483915	0.451035	0.435745	0.237954	0.307815
	119560	0.2	0.7	15	0.42735	0.169395	0.269056	0.249692	0.374246	0.299537	0.384692	0.271166	0.318103	0.461324	0.481184	0.452729	0.437534	0.203327	0.277634
	119560	0.2	0.7	2	0.574325	0.152352	0.295803	0.236852	0.415797	0.301793	0.451906	0.284569	0.349227	0.319129	0.305744	0.304255	0.385967	0.395919	0.39088
	119560	0.2	0.7	3	0.527233	0.162234	0.292464	0.241801	0.423548	0.307852	0.459156	0.284751	0.351509	0.467969	0.466287	0.465829	0.427816	0.368627	0.396022
	119560	0.2	0.7	4	0.481481	0.168243	0.284616	0.247377	0.408543	0.30816	0.443489	0.282184	0.344908	0.471983	0.485238	0.465553	0.473088	0.305111	0.370971
	119560	0.2	0.7	5	0.468242	0.169913	0.282065	0.248774	0.400244	0.306834	0.431683	0.280168	0.339801	0.468671	0.490983	0.464643	0.477428	0.320485	0.383522
	119560	0.2	0.7	6	0.454081	0.172048	0.279506	0.249663	0.390151	0.304483	0.413849	0.277229	0.332035	0.461521	0.48859	0.456916	0.467249	0.282768	0.35232
	119560	0.2	0.7	7	0.446791	0.173073	0.278078	0.251421	0.388446	0.305262	0.406666	0.276538	0.32921	0.454839	0.477698	0.441056	0.47604	0.231935	0.311904
	119560	0.2	0.7	8	0.439501	0.172958	0.275708	0.253758	0.386224	0.306282	0.401408	0.277525	0.328164	0.448522	0.479161	0.440406	0.445489	0.234968	0.307663
	119560	0.2	0.7	9	0.435478	0.172616	0.274173	0.251948	0.379791	0.302934	0.395126	0.275493	0.324638	0.44327	0.48025	0.43555	0.441382	0.236087	0.307629
	119560	0.2	0.8	1.2	0.595525	0.138999	0.287711	0.221316	0.3702	0.277021	0.401439	0.268147	0.321526	0.31835	0.302924	0.301615	0.342164	0.381143	0.360603
	119560	0.2	0.8	10	0.439082	0.169137	0.272516	0.254239	0.376295	0.303453	0.394672	0.279174	0.327024	0.45802	0.481676	0.443568	0.467007	0.22137	0.300363
	119560	0.2	0.8	11	0.43749	0.168269	0.271323	0.254363	0.376423	0.303583	0.393134	0.279127	0.326463	0.454666	0.475204	0.442401	0.415091	0.198693	0.268745
	119560	0.2	0.8	13	0.434389	0.168034	0.27017	0.252088	0.374211	0.301243	0.388587	0.275735	0.322576	0.46282	0.480783	0.452709	0.44816	0.204535	0.28088
	119560	0.2	0.8	15	0.431289	0.166875	0.268275	0.253638	0.373389	0.302078	0.384797	0.275613	0.321179	0.462857	0.480234	0.452836	0.452053	0.199678	0.277001
	119560	0.2	0.8	2	0.576169	0.147877	0.291894	0.238186	0.414831	0.302616	0.45078	0.285901	0.349889	0.319294	0.305461	0.302562	0.381095	0.407263	0.393745
	119560	0.2	0.8	3	0.530836	0.157931	0.289543	0.24454	0.424892	0.310421	0.460426	0.287538	0.354001	0.469781	0.465391	0.466174	0.441267	0.336069	0.381549
	119560	0.2	0.8	4	0.493632	0.165359	0.285703	0.252532	0.412673	0.313326	0.44802	0.289751	0.351909	0.46439	0.486144	0.463947	0.396939	0.308225	0.347001
	119560	0.2	0.8	5	0.473353	0.166208	0.280491	0.253887	0.405451	0.312249	0.439	0.287313	0.347317	0.472803	0.484265	0.460077	0.530866	0.269846	0.357812
	119560	0.2	0.8	6	0.458857	0.169198	0.278635	0.253585	0.39356	0.308435	0.41958	0.282268	0.337492	0.456299	0.482126	0.450764	0.421097	0.253283	0.31631
	119560	0.2	0.8	7	0.45207	0.171091	0.27811	0.254652	0.389968	0.308108	0.410252	0.280952	0.333508	0.450201	0.486877	0.446606	0.448352	0.269683	0.336789
	119560	0.2	0.8	8	0.445282	0.171266	0.276155	0.256269	0.388286	0.308757	0.405699	0.280538	0.331705	0.452718	0.482796	0.444444	0.447915	0.262322	0.33087
	119560	0.2	0.8	9	0.441344	0.1707	0.274476	0.254664	0.380807	0.305215	0.397989	0.278679	0.327816	0.447272	0.477913	0.436372	0.453261	0.230276	0.305397
	119560	0.25	0.6	1.2	0.590582	0.140963	0.288531	0.218559	0.364689	0.273318	0.41151	0.265283	0.3226	0.350688	0.332905	0.332777	0.359371	0.383958	0.371258
	119560	0.25	0.6	10	0.42115	0.17337	0.270213	0.246969	0.381342	0.299787	0.402578	0.269492	0.322858	0.432544	0.475222	0.42367	0.451318	0.234849	0.308938
	119560	0.25	0.6	11	0.41939	0.172978	0.269342	0.245576	0.379905	0.298316	0.402359	0.268249	0.321894	0.451385	0.474093	0.435587	0.466218	0.207514	0.287197
	119560	0.25	0.6	13	0.418133	0.172344	0.268445	0.246603	0.380051	0.299118	0.400282	0.269625	0.322212	0.460995	0.480167	0.448995	0.469716	0.219537	0.299222
	119560	0.25	0.6	15	0.416792	0.172261	0.26795	0.246456	0.380697	0.29921	0.39848	0.268247	0.320644	0.456972	0.479262	0.447526	0.451832	0.198096	0.275434
	119560	0.25	0.6	2	0.572985	0.151641	0.294767	0.234564	0.402466	0.296388	0.455722	0.284616	0.350396	0.351028	0.335625	0.332553	0.407089	0.420452	0.413662
	119560	0.25	0.6	3	0.541311	0.160373	0.294638	0.244264	0.421217	0.309215	0.474624	0.290246	0.360212	0.381488	0.362346	0.361917	0.436789	0.376183	0.404227
	119560	0.25	0.6	4	0.491202	0.167929	0.287205	0.249181	0.416541	0.311824	0.459958	0.284853	0.351822	0.466474	0.487918	0.465899	0.436003	0.321218	0.369911
	119560	0.25	0.6	5	0.461538	0.16984	0.279978	0.245936	0.409947	0.307435	0.446401	0.279352	0.343651	0.462489	0.492381	0.462309	0.429125	0.315017	0.363322
	119560	0.25	0.6	6	0.444109	0.168715	0.273729	0.243937	0.397007	0.302194	0.426553	0.272899	0.332849	0.459954	0.485515	0.454314	0.460077	0.258537	0.331046
	119560	0.25	0.6	7	0.437238	0.171063	0.273488	0.245925	0.393433	0.302663	0.418614	0.272264	0.329938	0.450014	0.480848	0.443439	0.446818	0.253255	0.323277
	119560	0.25	0.6	8	0.428356	0.172552	0.271871	0.245922	0.390691	0.301846	0.411292	0.269826	0.325867	0.450343	0.478873	0.440165	0.478127	0.228457	0.309182
	119560	0.25	0.6	9	0.425088	0.173275	0.271398	0.247087	0.38551	0.301154	0.406614	0.269438	0.324109	0.440074	0.474842	0.433322	0.440441	0.222466	0.295616
	119560	0.25	0.7	1.2	0.590163	0.143244	0.290753	0.223771	0.375115	0.28032	0.419262	0.271979	0.32993	0.349	0.336089	0.333026	0.3388	0.414201	0.372725
	119560	0.25	0.7	10	0.425842	0.173838	0.27208	0.25009	0.383964	0.302894	0.407164	0.273806	0.327427	0.435711	0.473596	0.422677	0.469082	0.222006	0.301377
	119560	0.25	0.7	11	0.425004	0.17393	0.271884	0.249724	0.383574	0.302504	0.407696	0.274204	0.327883	0.448676	0.474553	0.434927	0.502867	0.209459	0.295735
	119560	0.25	0.7	13	0.424082	0.173141	0.270973	0.251033	0.383215	0.30335	0.40489	0.275859	0.328146	0.461648	0.478142	0.447855	0.478378	0.210097	0.291966
	119560	0.25	0.7	15	0.422239	0.173012	0.270282	0.250867	0.383724	0.303388	0.402559	0.274387	0.326339	0.463801	0.480581	0.44922	0.517592	0.211353	0.300145
	119560	0.25	0.7	2	0.573236	0.152195	0.29537	0.237133	0.405915	0.299374	0.456972	0.287104	0.352648	0.348513	0.337748	0.332057	0.373994	0.431802	0.400825
	119560	0.25	0.7	3	0.5424	0.160023	0.294613	0.245812	0.421387	0.310498	0.475851	0.29192	0.361854	0.383281	0.362195	0.361557	0.447035	0.372428	0.406335
	119560	0.25	0.7	4	0.498073	0.16821	0.289449	0.25204	0.417942	0.314451	0.462132	0.288214	0.355017	0.468864	0.48687	0.465587	0.467056	0.306056	0.369792
	119560	0.25	0.7	5	0.46975	0.169608	0.282265	0.249276	0.414821	0.311415	0.452914	0.283829	0.348969	0.466808	0.487454	0.46194	0.47513	0.282319	0.354184
	119560	0.25	0.7	6	0.453746	0.169299	0.277162	0.247993	0.403379	0.307153	0.435052	0.278215	0.33939	0.460394	0.487781	0.456853	0.461742	0.277012	0.346281
	119560	0.25	0.7	7	0.443607	0.171229	0.275605	0.250132	0.39892	0.307472	0.425725	0.27773	0.33616	0.450908	0.484798	0.446586	0.453645	0.277905	0.344666
	119560	0.25	0.7	8	0.434724	0.172598	0.273921	0.249412	0.394801	0.305701	0.417069	0.274724	0.331252	0.44706	0.487879	0.442212	0.47028	0.275825	0.347713
	119560	0.25	0.7	9	0.43154	0.173454	0.273592	0.249176	0.389774	0.304006	0.412526	0.273205	0.328712	0.449128	0.475835	0.435227	0.478882	0.213837	0.295654
	119560	0.25	0.8	1.2	0.590079	0.14007	0.287493	0.226038	0.370888	0.280889	0.412434	0.274315	0.329485	0.348991	0.335032	0.332501	0.326825	0.392983	0.356864
	119560	0.25	0.8	10	0.433132	0.171888	0.272856	0.253216	0.382969	0.304861	0.404528	0.277239	0.329001	0.438134	0.473429	0.422697	0.484008	0.208878	0.291819
	119560	0.25	0.8	11	0.431708	0.171987	0.272485	0.252736	0.382092	0.304235	0.403967	0.277297	0.328856	0.445097	0.483384	0.434656	0.449056	0.224423	0.299278
	119560	0.25	0.8	13	0.430786	0.17188	0.272109	0.254024	0.381394	0.304943	0.4018	0.278361	0.328879	0.455348	0.479723	0.448185	0.432916	0.218122	0.290086
	119560	0.25	0.8	15	0.425758	0.170604	0.269511	0.254047	0.380533	0.304684	0.397493	0.27728	0.326679	0.465239	0.480587	0.451187	0.497176	0.217854	0.302957
	119560	0.25	0.8	2	0.573236	0.14801	0.291281	0.238205	0.405157	0.300019	0.450346	0.288463	0.351669	0.354616	0.332813	0.334001	0.463704	0.369494	0.411273
	119560	0.25	0.8	3	0.544243	0.156271	0.291633	0.247268	0.42013	0.311312	0.46837	0.294178	0.361378	0.381493	0.359454	0.36025	0.43132	0.348879	0.385744
	119560	0.25	0.8	4	0.500251	0.164461	0.286831	0.252816	0.415307	0.314302	0.455103	0.290111	0.354342	0.470307	0.485508	0.465258	0.476311	0.301324	0.369129
	119560	0.25	0.8	5	0.476035	0.167487	0.282364	0.251964	0.412122	0.31273	0.448067	0.286964	0.34986	0.468922	0.486279	0.460786	0.502517	0.277691	0.357711
	119560	0.25	0.8	6	0.457684	0.167859	0.277176	0.25075	0.4023	0.30894	0.431461	0.28103	0.340365	0.463301	0.485449	0.455984	0.483981	0.275314	0.350975
	119560	0.25	0.8	7	0.449472	0.169883	0.276329	0.253993	0.39845	0.31023	0.422859	0.281536	0.338021	0.454556	0.481055	0.444573	0.469269	0.241334	0.318745
	119560	0.25	0.8	8	0.441009	0.171404	0.274937	0.253095	0.394932	0.308491	0.416045	0.2785	0.333653	0.44801	0.47537	0.435086	0.449331	0.208627	0.28495
	119560	0.25	0.8	9	0.438327	0.171529	0.2742	0.252833	0.390621	0.306974	0.411668	0.277008	0.331173	0.445891	0.473704	0.432979	0.4655	0.217978	0.296919
	119560	0.3	0.6	1.2	0.586392	0.149957	0.296536	0.2281	0.382806	0.285864	0.433853	0.276425	0.337693	0.369779	0.352878	0.351795	0.387762	0.405396	0.396383
	119560	0.3	0.6	10	0.424334	0.174967	0.272478	0.243633	0.378798	0.296539	0.409474	0.271393	0.326432	0.442432	0.469435	0.417708	0.490581	0.21103	0.295113
	119560	0.3	0.6	11	0.423328	0.174211	0.271567	0.243697	0.378934	0.296629	0.410408	0.270991	0.326437	0.451023	0.476488	0.434089	0.504107	0.225475	0.311585
	119560	0.3	0.6	13	0.420731	0.174967	0.271319	0.243575	0.374162	0.295066	0.406955	0.270327	0.32486	0.450132	0.478631	0.441837	0.456854	0.223844	0.300468
	119560	0.3	0.6	15	0.418552	0.175768	0.271234	0.243573	0.375126	0.295364	0.406489	0.269029	0.323773	0.460535	0.477966	0.445865	0.486596	0.204227	0.287703
	119560	0.3	0.6	2	0.572985	0.15579	0.298773	0.236864	0.406748	0.299386	0.463106	0.288511	0.35553	0.371169	0.353333	0.352786	0.426612	0.392652	0.408928
	119560	0.3	0.6	3	0.543908	0.163359	0.298081	0.246322	0.423819	0.311564	0.477663	0.294009	0.363982	0.38628	0.36709	0.367072	0.443279	0.377198	0.407577
	119560	0.3	0.6	4	0.497654	0.169042	0.290042	0.246463	0.415241	0.309327	0.466212	0.289455	0.357161	0.470764	0.484103	0.464967	0.464011	0.304615	0.367786
	119560	0.3	0.6	5	0.465812	0.172946	0.283832	0.246841	0.404215	0.306508	0.447981	0.283731	0.347421	0.468553	0.488578	0.463338	0.492909	0.284478	0.360751
	119560	0.3	0.6	6	0.452656	0.173425	0.280182	0.244519	0.398566	0.303092	0.434994	0.277231	0.33864	0.464501	0.482019	0.452032	0.523523	0.252537	0.340718
	119560	0.3	0.6	7	0.445366	0.173062	0.277626	0.244012	0.392937	0.301065	0.425331	0.275095	0.334101	0.459109	0.47931	0.44421	0.50679	0.239868	0.325618
	119560	0.3	0.6	8	0.434222	0.174254	0.275072	0.244157	0.3862	0.299175	0.414466	0.272389	0.328733	0.451215	0.476021	0.438025	0.48381	0.216517	0.299155
	119560	0.3	0.6	9	0.431792	0.173951	0.274063	0.244839	0.383714	0.298934	0.412087	0.272826	0.328299	0.450312	0.477743	0.437382	0.500737	0.240165	0.32463
	119560	0.3	0.7	1.2	0.585805	0.14708	0.293531	0.23303	0.385891	0.290584	0.434707	0.28214	0.342188	0.369211	0.351636	0.351139	0.374953	0.381163	0.378033
	119560	0.3	0.7	10	0.4333	0.171338	0.272471	0.246632	0.385264	0.300741	0.415072	0.275331	0.33106	0.441512	0.470381	0.420025	0.511982	0.216921	0.304731
	119560	0.3	0.7	11	0.431875	0.170073	0.271017	0.246309	0.384735	0.30034	0.414738	0.274826	0.330588	0.446468	0.474536	0.432391	0.493917	0.21755	0.302057
	119560	0.3	0.7	13	0.430451	0.170836	0.271176	0.247489	0.379467	0.299587	0.411203	0.27561	0.330022	0.461548	0.475319	0.439652	0.548619	0.201864	0.295134
	119560	0.3	0.7	15	0.424753	0.17218	0.270433	0.247444	0.378665	0.299303	0.409076	0.273741	0.327997	0.460808	0.476993	0.444018	0.500277	0.196301	0.281964
	119560	0.3	0.7	2	0.573655	0.151162	0.294474	0.24065	0.40642	0.302301	0.460114	0.292163	0.35739	0.370174	0.355847	0.352761	0.406976	0.436073	0.421022
	119560	0.3	0.7	3	0.54902	0.158937	0.295398	0.248506	0.423649	0.313259	0.477466	0.297694	0.366734	0.385256	0.364637	0.365359	0.426824	0.348162	0.383501
	119560	0.3	0.7	4	0.513742	0.165479	0.291571	0.248026	0.419792	0.311819	0.46762	0.291727	0.359302	0.468201	0.48472	0.464914	0.458527	0.302585	0.36458
	119560	0.3	0.7	5	0.47637	0.169217	0.283919	0.249468	0.409214	0.30997	0.451331	0.287259	0.351071	0.463146	0.492749	0.461902	0.450398	0.329439	0.380538
	119560	0.3	0.7	6	0.463466	0.169229	0.280057	0.248288	0.403483	0.307409	0.439913	0.281797	0.343535	0.463292	0.483367	0.454233	0.490809	0.266534	0.345464
	119560	0.3	0.7	7	0.453997	0.170241	0.278008	0.248247	0.397777	0.305707	0.429813	0.279718	0.33889	0.456232	0.481576	0.445785	0.500388	0.257945	0.340411
	119560	0.3	0.7	8	0.44369	0.170637	0.275154	0.247139	0.39243	0.303282	0.420847	0.276745	0.333912	0.449289	0.478111	0.438758	0.469857	0.22152	0.301088
	119560	0.3	0.7	9	0.440758	0.170517	0.274147	0.248093	0.39019	0.303324	0.417979	0.277401	0.333481	0.451485	0.477866	0.437376	0.521188	0.228498	0.317708
	119560	0.3	0.8	1.2	0.585805	0.144721	0.291167	0.234998	0.385598	0.292025	0.431788	0.284191	0.342776	0.368797	0.353471	0.351123	0.364844	0.399415	0.381348
	119560	0.3	0.8	10	0.437154	0.169434	0.272156	0.251002	0.383705	0.303481	0.414626	0.279966	0.334243	0.444922	0.469478	0.419211	0.514937	0.208464	0.296781
	119560	0.3	0.8	11	0.436316	0.167999	0.270741	0.251438	0.383672	0.303789	0.414187	0.280184	0.334255	0.446852	0.470628	0.428015	0.491095	0.211979	0.296134
	119560	0.3	0.8	13	0.434976	0.168939	0.27108	0.252403	0.378337	0.302798	0.410554	0.280994	0.333637	0.453622	0.476055	0.440048	0.483201	0.216759	0.299269
	119560	0.3	0.8	15	0.430954	0.169748	0.270469	0.251531	0.377713	0.30197	0.407982	0.27813	0.330768	0.468436	0.482051	0.450799	0.547327	0.233269	0.327121
	119560	0.3	0.8	2	0.573906	0.147795	0.291239	0.242045	0.404499	0.302863	0.454273	0.293562	0.356649	0.374153	0.354563	0.35485	0.47235	0.424158	0.446959
	119560	0.3	0.8	3	0.552288	0.154996	0.292579	0.250804	0.424439	0.315297	0.472203	0.301192	0.367791	0.383378	0.366895	0.36486	0.402539	0.399281	0.400903
	119560	0.3	0.8	4	0.517932	0.162184	0.289828	0.250105	0.417955	0.312944	0.462298	0.294002	0.359425	0.465581	0.489052	0.465942	0.417728	0.352645	0.382437
	119560	0.3	0.8	5	0.478884	0.16599	0.28194	0.252214	0.408625	0.311909	0.448996	0.290387	0.35268	0.467042	0.485989	0.460161	0.499044	0.284209	0.362164
	119560	0.3	0.8	6	0.467069	0.167116	0.279383	0.252281	0.403812	0.310548	0.439375	0.285958	0.346442	0.464055	0.485747	0.455709	0.515332	0.272606	0.356583
	119560	0.3	0.8	7	0.456846	0.168419	0.277383	0.252491	0.397087	0.308695	0.429238	0.284078	0.341888	0.454542	0.48023	0.444325	0.498446	0.252585	0.335272
	119560	0.3	0.8	8	0.447461	0.169432	0.275344	0.250758	0.392398	0.305982	0.422262	0.280748	0.337261	0.449859	0.477581	0.439798	0.485068	0.239532	0.320699
	119560	0.3	0.8	9	0.443439	0.16949	0.27415	0.251485	0.388906	0.305451	0.418178	0.28098	0.336118	0.449543	0.476142	0.435662	0.486875	0.227813	0.310392
	119560	0.35	0.6	1.2	0.580694	0.149291	0.294435	0.2294	0.391271	0.289228	0.441744	0.278472	0.341601	0.369961	0.355497	0.35285	0.398002	0.422259	0.409772
	119560	0.35	0.6	10	0.427602	0.17747	0.275475	0.245783	0.391784	0.302067	0.420304	0.274137	0.331838	0.44954	0.473921	0.425267	0.554414	0.236559	0.331621
	119560	0.35	0.6	11	0.42425	0.177235	0.274211	0.245335	0.388501	0.300749	0.418156	0.273182	0.330468	0.451395	0.470332	0.426673	0.53545	0.205323	0.296826
	119560	0.35	0.6	13	0.422239	0.175951	0.272568	0.247076	0.383374	0.300492	0.41288	0.274477	0.329744	0.459815	0.474787	0.438244	0.532707	0.200645	0.291497
	119560	0.35	0.6	15	0.421233	0.176462	0.272638	0.247029	0.38403	0.300659	0.411518	0.273514	0.328615	0.45929	0.479465	0.448123	0.486861	0.217889	0.301047
	119560	0.35	0.6	2	0.568963	0.153842	0.295855	0.234789	0.415359	0.299999	0.467221	0.287362	0.355856	0.37215	0.35537	0.354341	0.440253	0.428605	0.434351
	119560	0.35	0.6	3	0.546003	0.160488	0.296019	0.244655	0.430534	0.312008	0.480065	0.291416	0.362675	0.389945	0.370135	0.368953	0.491299	0.411026	0.447592
	119560	0.35	0.6	4	0.509888	0.165112	0.290153	0.249748	0.425952	0.314875	0.467364	0.291671	0.359184	0.468961	0.483652	0.462389	0.491151	0.314582	0.38352
	119560	0.35	0.6	5	0.4819	0.167468	0.284082	0.247067	0.414215	0.309516	0.450257	0.282574	0.347231	0.466743	0.491838	0.462424	0.492593	0.334795	0.398647
	119560	0.35	0.6	6	0.455757	0.171893	0.279895	0.244088	0.406954	0.305149	0.440004	0.277265	0.340173	0.460743	0.478634	0.448558	0.488224	0.232759	0.315232
	119560	0.35	0.6	7	0.444528	0.173333	0.277582	0.244361	0.401883	0.303924	0.430026	0.275435	0.335792	0.454257	0.478939	0.443559	0.505339	0.250311	0.33479
	119560	0.35	0.6	8	0.437071	0.174692	0.27632	0.244673	0.400613	0.303801	0.426655	0.274587	0.334133	0.453491	0.483405	0.444237	0.510723	0.272583	0.355454
	119560	0.35	0.6	9	0.434473	0.176492	0.276913	0.246576	0.397352	0.304312	0.423644	0.275595	0.333947	0.445021	0.475635	0.434568	0.490413	0.227908	0.311195
	119560	0.35	0.7	1.2	0.580359	0.146275	0.291362	0.232624	0.395074	0.292828	0.444527	0.283122	0.345923	0.367734	0.354339	0.350749	0.354588	0.413674	0.381859
	119560	0.35	0.7	10	0.437908	0.170553	0.273289	0.250772	0.393566	0.306347	0.421919	0.280054	0.336652	0.448507	0.471588	0.422413	0.556345	0.224205	0.319608
	119560	0.35	0.7	11	0.432546	0.170606	0.271652	0.250232	0.390151	0.304906	0.420252	0.278776	0.335197	0.452713	0.477537	0.434424	0.53312	0.250647	0.340981
	119560	0.35	0.7	13	0.428607	0.170228	0.270113	0.25219	0.385986	0.305063	0.415689	0.280589	0.335032	0.45744	0.475502	0.439473	0.522552	0.207182	0.29672
	119560	0.35	0.7	15	0.427602	0.171034	0.270434	0.252551	0.384833	0.304965	0.413443	0.28001	0.333889	0.466802	0.479497	0.449205	0.547634	0.232057	0.325981
	119560	0.35	0.7	2	0.570387	0.149116	0.29164	0.238284	0.417291	0.303348	0.466399	0.291409	0.3587	0.368123	0.355463	0.35133	0.369219	0.432934	0.398546
	119560	0.35	0.7	3	0.554215	0.154581	0.292697	0.248727	0.433044	0.315971	0.47998	0.299368	0.368746	0.387133	0.372347	0.368925	0.438563	0.428082	0.433259
	119560	0.35	0.7	4	0.517597	0.158881	0.286769	0.252292	0.426222	0.316964	0.465716	0.297855	0.363335	0.475054	0.48579	0.466436	0.534877	0.337629	0.413957
	119560	0.35	0.7	5	0.489526	0.161934	0.281551	0.250235	0.414631	0.312109	0.448415	0.288307	0.350963	0.467363	0.490503	0.464015	0.475079	0.326287	0.386869
	119560	0.35	0.7	6	0.474024	0.164977	0.279648	0.248824	0.407878	0.30909	0.439613	0.283625	0.344798	0.459561	0.484634	0.453912	0.47699	0.27569	0.349422
	119560	0.35	0.7	7	0.456678	0.167037	0.276192	0.24887	0.400786	0.307066	0.43008	0.281286	0.340122	0.45282	0.476479	0.440663	0.479441	0.238661	0.318684
	119560	0.35	0.7	8	0.449053	0.168533	0.2751	0.249555	0.400197	0.307413	0.426764	0.280997	0.33887	0.446618	0.47631	0.437727	0.448103	0.227426	0.30172
	119560	0.35	0.7	9	0.446204	0.169952	0.275378	0.250665	0.399219	0.307964	0.425201	0.281083	0.338438	0.450929	0.474725	0.433523	0.515515	0.227816	0.31599
	119560	0.35	0.8	1.2	0.580191	0.141705	0.286734	0.235229	0.395582	0.295025	0.443572	0.286612	0.348222	0.36891	0.352179	0.351128	0.369482	0.375131	0.372285
	119560	0.35	0.8	10	0.449891	0.165107	0.272544	0.252996	0.392976	0.30782	0.421248	0.283977	0.339253	0.431	0.47149	0.418117	0.484509	0.219856	0.302463
	119560	0.35	0.8	11	0.444109	0.165396	0.271023	0.253977	0.390387	0.307743	0.419849	0.284631	0.339263	0.44634	0.483756	0.439004	0.491427	0.259126	0.339327
	119560	0.35	0.8	13	0.441679	0.164709	0.269719	0.255192	0.38629	0.307345	0.4153	0.286264	0.338916	0.459523	0.48457	0.448184	0.5324	0.254941	0.344782
	119560	0.35	0.8	15	0.438495	0.166376	0.270102	0.254935	0.384763	0.306675	0.412704	0.284338	0.336701	0.467422	0.480223	0.449316	0.548025	0.225361	0.319384
	119560	0.35	0.8	2	0.570722	0.143685	0.286364	0.240106	0.414491	0.30407	0.461763	0.293613	0.358972	0.372691	0.354447	0.352835	0.439424	0.415209	0.426974
	119560	0.35	0.8	3	0.554801	0.148354	0.286892	0.249025	0.42991	0.315371	0.47424	0.30061	0.367971	0.392776	0.368856	0.370266	0.506026	0.387712	0.439038
	119560	0.35	0.8	4	0.521116	0.153184	0.282536	0.254034	0.427389	0.318661	0.465069	0.301022	0.365481	0.466755	0.48955	0.465956	0.457736	0.378433	0.414324
	119560	0.35	0.8	5	0.496648	0.15487	0.277337	0.251601	0.413904	0.312961	0.446962	0.291173	0.352627	0.464354	0.490684	0.463266	0.440352	0.332423	0.378851
	119560	0.35	0.8	6	0.4819	0.158055	0.275983	0.249692	0.404289	0.308717	0.435035	0.285948	0.345077	0.46127	0.483846	0.454651	0.469886	0.27224	0.344744
	119560	0.35	0.8	7	0.467069	0.160939	0.274171	0.250693	0.400437	0.308346	0.42909	0.284264	0.341976	0.451913	0.477437	0.441143	0.487558	0.257473	0.336987
	119560	0.35	0.8	8	0.460114	0.161855	0.272895	0.251941	0.398347	0.308663	0.425217	0.284485	0.340897	0.446386	0.479326	0.437556	0.476765	0.251717	0.329479
	119560	0.35	0.8	9	0.4576	0.1641	0.27403	0.253526	0.398396	0.309865	0.425114	0.285546	0.341625	0.441006	0.475324	0.433784	0.448136	0.236237	0.309382
	119560	0.4	0.6	1.2	0.569717	0.153729	0.295942	0.22404	0.401977	0.28772	0.458697	0.279692	0.347497	0.374903	0.358881	0.356763	0.422795	0.42856	0.425658
	119560	0.4	0.6	10	0.422239	0.174623	0.271537	0.239339	0.392777	0.297436	0.415969	0.270615	0.327906	0.448973	0.471423	0.421115	0.573427	0.226398	0.324627
	119560	0.4	0.6	11	0.418301	0.174773	0.270384	0.239079	0.390917	0.2967	0.414898	0.269513	0.326764	0.446807	0.475941	0.431194	0.486524	0.238835	0.320391
	119560	0.4	0.6	13	0.416625	0.175051	0.270057	0.239696	0.388419	0.29645	0.414346	0.271363	0.327947	0.457692	0.485788	0.44868	0.525985	0.25704	0.345326
	119560	0.4	0.6	15	0.413776	0.175997	0.269858	0.240143	0.388277	0.29675	0.415233	0.270484	0.327581	0.464294	0.478043	0.444872	0.541075	0.210865	0.303465
	119560	0.4	0.6	2	0.560499	0.157631	0.297241	0.226941	0.413446	0.293035	0.471451	0.284325	0.354722	0.374483	0.358465	0.35679	0.416835	0.414101	0.415464
	119560	0.4	0.6	3	0.544411	0.160868	0.295936	0.235374	0.424169	0.30275	0.47836	0.289389	0.360618	0.399321	0.37982	0.379127	0.456379	0.397081	0.42467
	119560	0.4	0.6	4	0.490866	0.164658	0.284297	0.238932	0.420485	0.304716	0.458207	0.283959	0.350628	0.468632	0.488332	0.464911	0.479504	0.322912	0.385929
	119560	0.4	0.6	5	0.47151	0.168259	0.281666	0.23884	0.407681	0.301214	0.448704	0.280257	0.345018	0.466509	0.485621	0.459572	0.487908	0.288184	0.362347
	119560	0.4	0.6	6	0.457684	0.169038	0.278147	0.239687	0.404139	0.30091	0.439138	0.276632	0.339437	0.46961	0.487019	0.458254	0.555174	0.296292	0.386377
	119560	0.4	0.6	7	0.443858	0.170377	0.274997	0.238281	0.396814	0.297761	0.422812	0.271504	0.330671	0.454939	0.481761	0.445767	0.501707	0.260718	0.343126
	119560	0.4	0.6	8	0.435227	0.172044	0.273639	0.237237	0.397007	0.296998	0.419561	0.270085	0.328624	0.448666	0.480616	0.437711	0.478677	0.254548	0.332357
	119560	0.4	0.6	9	0.42978	0.174018	0.273477	0.23788	0.393665	0.296558	0.417881	0.270603	0.328489	0.444496	0.475132	0.432368	0.488181	0.232466	0.314954
	119560	0.4	0.7	1.2	0.569382	0.15342	0.295558	0.228151	0.405736	0.292068	0.457078	0.283958	0.350296	0.373056	0.354473	0.354271	0.379903	0.365803	0.37272
	119560	0.4	0.7	10	0.427937	0.17233	0.271563	0.244184	0.394674	0.301704	0.418657	0.275213	0.332108	0.431531	0.47544	0.422441	0.485207	0.23698	0.318434
	119560	0.4	0.7	11	0.424585	0.172679	0.270771	0.244844	0.391973	0.301412	0.417282	0.275025	0.331538	0.451976	0.471271	0.427352	0.523531	0.206321	0.295993
	119560	0.4	0.7	13	0.422574	0.173081	0.270443	0.244635	0.387723	0.29999	0.415342	0.27624	0.331802	0.449038	0.478472	0.440588	0.460582	0.237075	0.313026
	119560	0.4	0.7	15	0.419809	0.173473	0.269862	0.244544	0.386326	0.299503	0.414616	0.27478	0.330516	0.463301	0.47845	0.44639	0.519081	0.216465	0.305522
	119560	0.4	0.7	2	0.563013	0.156484	0.296821	0.230219	0.417157	0.296697	0.468438	0.287243	0.356117	0.378477	0.353216	0.354649	0.490552	0.366868	0.419789
	119560	0.4	0.7	3	0.548014	0.159874	0.295995	0.23917	0.424413	0.305936	0.473573	0.293271	0.362225	0.399484	0.38041	0.380101	0.440929	0.40297	0.421096
	119560	0.4	0.7	4	0.496397	0.163608	0.284981	0.242054	0.418448	0.306697	0.454188	0.28681	0.351595	0.465861	0.481682	0.459725	0.437094	0.298184	0.354517
	119560	0.4	0.7	5	0.478465	0.166479	0.282231	0.242089	0.404453	0.302884	0.443627	0.28346	0.345902	0.464879	0.486037	0.460192	0.469107	0.284623	0.354288
	119560	0.4	0.7	6	0.463466	0.167212	0.278383	0.242953	0.399384	0.302121	0.433831	0.280121	0.34043	0.464175	0.490241	0.456514	0.473984	0.312855	0.376921
	119560	0.4	0.7	7	0.450478	0.16845	0.275469	0.243667	0.394573	0.30128	0.421538	0.276317	0.333817	0.451424	0.480077	0.443997	0.472594	0.257598	0.333444
	119560	0.4	0.7	8	0.441595	0.169905	0.273915	0.242429	0.394978	0.300449	0.420212	0.275222	0.332603	0.446955	0.478201	0.43951	0.453359	0.240702	0.314452
	119560	0.4	0.7	9	0.43749	0.17172	0.274091	0.242862	0.392929	0.300185	0.419231	0.27566	0.332614	0.451338	0.477094	0.436654	0.500185	0.239846	0.324222
	119560	0.4	0.8	1.2	0.56913	0.14681	0.289057	0.230515	0.405124	0.293837	0.452001	0.286796	0.350928	0.375826	0.361184	0.35744	0.425543	0.448131	0.436545
	119560	0.4	0.8	10	0.443439	0.164675	0.270228	0.246359	0.389809	0.301911	0.414289	0.278588	0.33315	0.433599	0.476241	0.425453	0.468151	0.260145	0.334444
	119560	0.4	0.8	11	0.439333	0.165399	0.269565	0.247648	0.387586	0.302204	0.41225	0.279249	0.332959	0.441557	0.471552	0.42793	0.467869	0.215365	0.294957
	119560	0.4	0.8	13	0.437992	0.165737	0.269428	0.248306	0.384908	0.301873	0.411023	0.2818	0.33436	0.451994	0.476332	0.439553	0.4788	0.218801	0.300349
	119560	0.4	0.8	15	0.436316	0.165734	0.26891	0.248369	0.382618	0.301212	0.409793	0.280779	0.333234	0.455454	0.47768	0.444526	0.470667	0.210276	0.290685
	119560	0.4	0.8	2	0.562762	0.149236	0.289801	0.231771	0.41546	0.29755	0.461827	0.289461	0.355871	0.376839	0.357389	0.357722	0.451161	0.404768	0.426708
	119560	0.4	0.8	3	0.547428	0.152821	0.289238	0.240562	0.423485	0.306829	0.465976	0.295238	0.361459	0.396761	0.378879	0.377243	0.40086	0.381932	0.391167
	119560	0.4	0.8	4	0.505279	0.155477	0.280284	0.243509	0.416071	0.307217	0.448556	0.289108	0.3516	0.472696	0.487601	0.468717	0.507527	0.354442	0.417391
	119560	0.4	0.8	5	0.488604	0.157153	0.277102	0.243527	0.40068	0.302935	0.4368	0.286487	0.346025	0.461425	0.49163	0.460514	0.417954	0.342445	0.376451
	119560	0.4	0.8	6	0.477208	0.158086	0.274663	0.244502	0.396246	0.302406	0.427989	0.283334	0.340953	0.455459	0.487158	0.453584	0.422018	0.303164	0.352851
	119560	0.4	0.8	7	0.465225	0.159369	0.272291	0.246016	0.391669	0.302208	0.416612	0.279922	0.334855	0.45577	0.477358	0.440672	0.503207	0.257504	0.340676
	119560	0.4	0.8	8	0.457852	0.160855	0.271381	0.245185	0.392755	0.301902	0.41586	0.279039	0.33398	0.446758	0.48352	0.442555	0.455642	0.279635	0.346573
	119560	0.4	0.8	9	0.452321	0.162899	0.271446	0.246318	0.390179	0.301991	0.415914	0.279875	0.334596	0.443661	0.479531	0.435635	0.486376	0.263876	0.342133
	131516	0.2	0.6	1.2	0.603821	0.138243	0.288919	0.211769	0.362723	0.267413	0.392105	0.25714	0.310594	0.316077	0.306236	0.301974	0.340565	0.442798	0.38501
	131516	0.2	0.6	10	0.433467	0.170968	0.27223	0.248438	0.370444	0.297415	0.385774	0.270654	0.318119	0.456896	0.479833	0.445723	0.47562	0.223169	0.303793
	131516	0.2	0.6	11	0.435478	0.170609	0.272574	0.247946	0.368946	0.296579	0.384956	0.269993	0.317385	0.4572	0.481225	0.450066	0.432724	0.218105	0.290028
	131516	0.2	0.6	13	0.431121	0.171389	0.271826	0.24658	0.365897	0.294617	0.380967	0.2679	0.314582	0.463253	0.481224	0.454578	0.449286	0.216933	0.292591
	131516	0.2	0.6	15	0.431708	0.169294	0.270344	0.247388	0.365752	0.295145	0.378521	0.267874	0.313727	0.467529	0.482705	0.457714	0.45529	0.215066	0.292136
	131516	0.2	0.6	2	0.582035	0.150967	0.296425	0.235527	0.409831	0.29914	0.443583	0.281875	0.344706	0.321357	0.307216	0.305253	0.38319	0.412832	0.397459
	131516	0.2	0.6	3	0.535194	0.16064	0.293213	0.240779	0.421492	0.30648	0.454673	0.282989	0.348852	0.464485	0.444085	0.441444	0.396947	0.378376	0.387439
	131516	0.2	0.6	4	0.493632	0.16851	0.288412	0.248129	0.408494	0.308728	0.440358	0.280846	0.342962	0.468364	0.479178	0.465895	0.449369	0.318351	0.37268
	131516	0.2	0.6	5	0.473018	0.16997	0.283547	0.249465	0.395568	0.30597	0.42359	0.278071	0.335741	0.469596	0.485779	0.461615	0.500073	0.272881	0.353088
	131516	0.2	0.6	6	0.463382	0.171082	0.281561	0.249648	0.387719	0.303728	0.414838	0.276715	0.331983	0.462955	0.489279	0.460505	0.462627	0.298188	0.362637
	131516	0.2	0.6	7	0.45098	0.171356	0.27799	0.248469	0.382341	0.301199	0.401577	0.272473	0.324661	0.459092	0.484114	0.453648	0.450468	0.256187	0.326621
	131516	0.2	0.6	8	0.439417	0.171007	0.274123	0.248785	0.377685	0.299974	0.389861	0.270862	0.319645	0.463763	0.478237	0.445753	0.499918	0.219138	0.304708
	131516	0.2	0.6	9	0.435395	0.170566	0.272513	0.248845	0.374465	0.298996	0.38497	0.270154	0.317501	0.451854	0.479248	0.441799	0.451839	0.232165	0.306727
	131516	0.2	0.7	1.2	0.603402	0.13717	0.287695	0.217488	0.369254	0.273743	0.39649	0.264281	0.317159	0.31604	0.303927	0.300642	0.3344	0.426589	0.37491
	131516	0.2	0.7	10	0.44478	0.169006	0.274172	0.253713	0.370619	0.30122	0.385751	0.276676	0.322233	0.461796	0.478872	0.444904	0.491261	0.221638	0.305463
	131516	0.2	0.7	11	0.445618	0.168295	0.273852	0.253101	0.369571	0.300443	0.385104	0.276464	0.321864	0.460173	0.479214	0.448534	0.453986	0.207883	0.28518
	131516	0.2	0.7	13	0.439668	0.169356	0.272874	0.251265	0.366467	0.298124	0.380736	0.273344	0.318224	0.464548	0.482631	0.455346	0.459248	0.21753	0.295223
	131516	0.2	0.7	15	0.436903	0.167835	0.270791	0.252216	0.365585	0.298499	0.377896	0.273768	0.317513	0.468036	0.482854	0.458123	0.467788	0.227718	0.30632
	131516	0.2	0.7	2	0.582872	0.147851	0.293561	0.238	0.410299	0.301253	0.443196	0.284287	0.346385	0.323156	0.308374	0.307054	0.402332	0.404713	0.403519
	131516	0.2	0.7	3	0.535948	0.157048	0.29012	0.242311	0.424516	0.30852	0.455655	0.284662	0.350411	0.467444	0.439269	0.441688	0.428943	0.332264	0.374464
	131516	0.2	0.7	4	0.503017	0.165006	0.288099	0.25144	0.409179	0.311478	0.440135	0.285553	0.34638	0.468546	0.479252	0.46612	0.449587	0.317376	0.372086
	131516	0.2	0.7	5	0.477376	0.166586	0.282	0.253736	0.394891	0.308954	0.423503	0.283982	0.339985	0.465746	0.488296	0.46284	0.436313	0.281798	0.342432
	131516	0.2	0.7	6	0.467991	0.168433	0.280758	0.25354	0.388523	0.306842	0.414593	0.281483	0.335311	0.460477	0.487817	0.457601	0.409668	0.292391	0.341234
	131516	0.2	0.7	7	0.455924	0.169282	0.277812	0.252602	0.382399	0.304235	0.399802	0.277793	0.327813	0.461201	0.485076	0.452774	0.47633	0.24558	0.324077
	131516	0.2	0.7	8	0.447964	0.169478	0.275536	0.253835	0.378315	0.303819	0.390149	0.276736	0.323799	0.456788	0.477317	0.444207	0.469712	0.217239	0.297081
	131516	0.2	0.7	9	0.444109	0.168794	0.273794	0.25333	0.374871	0.302343	0.385569	0.275561	0.321413	0.447428	0.480549	0.438899	0.430556	0.241723	0.309619
	131516	0.2	0.8	1.2	0.603318	0.133938	0.284266	0.220583	0.370155	0.276433	0.39813	0.2677	0.32014	0.315335	0.306117	0.301153	0.319575	0.456814	0.376065
	131516	0.2	0.8	10	0.449388	0.167542	0.274393	0.256465	0.372371	0.303736	0.388751	0.280035	0.325557	0.454346	0.478521	0.443837	0.434784	0.221391	0.29339
	131516	0.2	0.8	11	0.449723	0.167101	0.274133	0.256507	0.372071	0.303665	0.388251	0.280205	0.325496	0.455834	0.479459	0.44758	0.429821	0.207375	0.27977
	131516	0.2	0.8	13	0.444528	0.167705	0.273038	0.255432	0.368943	0.301869	0.384055	0.277694	0.322327	0.464702	0.485799	0.458071	0.447734	0.250944	0.321625
	131516	0.2	0.8	15	0.43992	0.16613	0.27034	0.256148	0.366981	0.301708	0.379364	0.277494	0.320529	0.463251	0.4822	0.456715	0.427449	0.208199	0.280011
	131516	0.2	0.8	2	0.586057	0.143115	0.289609	0.241196	0.408952	0.303431	0.443432	0.287064	0.348512	0.320609	0.307395	0.305294	0.367438	0.389542	0.378167
	131516	0.2	0.8	3	0.541059	0.153251	0.287955	0.24705	0.422537	0.311797	0.452642	0.288699	0.352543	0.464633	0.441381	0.441278	0.397744	0.339533	0.36634
	131516	0.2	0.8	4	0.507877	0.162342	0.28714	0.255459	0.410008	0.314787	0.439266	0.289595	0.349063	0.469337	0.480695	0.46746	0.464093	0.326551	0.383358
	131516	0.2	0.8	5	0.480644	0.164103	0.280847	0.257369	0.396703	0.312195	0.423081	0.287767	0.342545	0.467756	0.49142	0.465772	0.469337	0.327676	0.385917
	131516	0.2	0.8	6	0.472013	0.164943	0.279026	0.258154	0.390463	0.310814	0.414624	0.285943	0.338466	0.460482	0.485504	0.45739	0.423784	0.264043	0.325364
	131516	0.2	0.8	7	0.460701	0.165564	0.27618	0.25606	0.383652	0.307132	0.401292	0.281534	0.330911	0.459257	0.482796	0.45281	0.438874	0.242542	0.312424
	131516	0.2	0.8	8	0.452824	0.166139	0.274284	0.256937	0.379494	0.306415	0.392343	0.280484	0.327115	0.457362	0.478154	0.444908	0.47493	0.220154	0.300849
	131516	0.2	0.8	9	0.448886	0.167591	0.27428	0.256196	0.375574	0.304606	0.387741	0.279103	0.324573	0.449029	0.477164	0.436637	0.464041	0.211787	0.290837
	131516	0.25	0.6	1.2	0.59628	0.140586	0.289532	0.218155	0.367334	0.273739	0.407874	0.266699	0.322514	0.355041	0.338323	0.338002	0.360761	0.379099	0.369703
	131516	0.25	0.6	10	0.42668	0.172759	0.271501	0.240802	0.375892	0.293551	0.393236	0.267221	0.318206	0.45773	0.475126	0.437804	0.476937	0.206682	0.288389
	131516	0.25	0.6	11	0.42844	0.172707	0.272019	0.241246	0.374469	0.293445	0.393652	0.268456	0.319218	0.44917	0.480881	0.4447	0.4338	0.240193	0.309189
	131516	0.25	0.6	13	0.423999	0.172937	0.270786	0.242663	0.373079	0.29406	0.392039	0.267138	0.317755	0.464589	0.479468	0.448024	0.498899	0.203609	0.289194
	131516	0.25	0.6	15	0.421988	0.173873	0.270873	0.24484	0.372959	0.295615	0.390904	0.26746	0.317609	0.465445	0.477984	0.449035	0.471068	0.199733	0.280524
	131516	0.25	0.6	2	0.579186	0.151192	0.295919	0.238085	0.407611	0.300594	0.452261	0.288712	0.352437	0.355023	0.341495	0.338392	0.375763	0.414432	0.394151
	131516	0.25	0.6	3	0.541646	0.160104	0.294482	0.244684	0.421827	0.309716	0.467745	0.29042	0.358346	0.373752	0.35389	0.354398	0.44846	0.375089	0.408506
	131516	0.25	0.6	4	0.498743	0.167285	0.288846	0.249221	0.419675	0.31273	0.452489	0.28659	0.35092	0.46893	0.479911	0.467365	0.44235	0.339699	0.384288
	131516	0.25	0.6	5	0.469164	0.169362	0.281884	0.246678	0.405169	0.306656	0.433043	0.281017	0.340847	0.467679	0.485668	0.460405	0.493911	0.269482	0.348707
	131516	0.25	0.6	6	0.453578	0.170543	0.278127	0.244745	0.397777	0.303037	0.423699	0.277305	0.335216	0.471514	0.486388	0.461141	0.512025	0.265626	0.34979
	131516	0.25	0.6	7	0.441176	0.171548	0.275105	0.241651	0.39128	0.298779	0.409568	0.271416	0.326479	0.457641	0.486728	0.453063	0.468495	0.276084	0.347429
	131516	0.25	0.6	8	0.432462	0.172752	0.273329	0.241512	0.386348	0.297224	0.400654	0.269405	0.322175	0.454545	0.479905	0.445768	0.453413	0.231894	0.306852
	131516	0.25	0.6	9	0.430032	0.171369	0.271466	0.241774	0.37977	0.295453	0.393461	0.268231	0.318996	0.452191	0.478001	0.440333	0.461089	0.226474	0.303753
	131516	0.25	0.7	1.2	0.596112	0.140497	0.289399	0.222521	0.370953	0.278175	0.41296	0.272266	0.328169	0.354817	0.340126	0.338422	0.349785	0.410493	0.377716
	131516	0.25	0.7	10	0.431289	0.170915	0.271503	0.246048	0.375857	0.297405	0.394188	0.272978	0.322572	0.451156	0.477675	0.439831	0.471942	0.227801	0.307281
	131516	0.25	0.7	11	0.432797	0.171257	0.272249	0.246774	0.374098	0.297381	0.393907	0.274104	0.323263	0.457634	0.479362	0.444242	0.503352	0.219419	0.305615
	131516	0.25	0.7	13	0.42844	0.171077	0.270733	0.24728	0.37346	0.297546	0.393078	0.272519	0.32188	0.462797	0.478796	0.448631	0.478026	0.201053	0.283056
	131516	0.25	0.7	15	0.426764	0.170535	0.269774	0.250444	0.37465	0.300207	0.392456	0.273417	0.322296	0.46856	0.481561	0.453307	0.507733	0.207909	0.295014
	131516	0.25	0.7	2	0.580359	0.148333	0.293405	0.238612	0.40702	0.300852	0.450754	0.288688	0.351961	0.357586	0.342166	0.339637	0.427527	0.427336	0.427432
	131516	0.25	0.7	3	0.543824	0.1571	0.292292	0.246247	0.422727	0.311209	0.466015	0.29164	0.358761	0.372058	0.353487	0.353409	0.418036	0.370605	0.392894
	131516	0.25	0.7	4	0.505279	0.165687	0.289341	0.251932	0.417558	0.314258	0.451459	0.290154	0.353264	0.468954	0.47813	0.4651	0.455206	0.321898	0.377118
	131516	0.25	0.7	5	0.479135	0.167694	0.283457	0.251077	0.405684	0.310183	0.434746	0.286631	0.345483	0.471709	0.48869	0.464348	0.50707	0.293736	0.371987
	131516	0.25	0.7	6	0.461538	0.168713	0.279048	0.248589	0.395777	0.305373	0.42372	0.281228	0.338073	0.462074	0.487955	0.459449	0.440472	0.275902	0.339284
	131516	0.25	0.7	7	0.448048	0.169726	0.275763	0.246253	0.388291	0.301375	0.408574	0.275988	0.329442	0.46162	0.482056	0.452239	0.47137	0.248008	0.325013
	131516	0.25	0.7	8	0.437322	0.170723	0.273241	0.245966	0.385938	0.300449	0.401843	0.273906	0.325763	0.454777	0.479364	0.44624	0.473281	0.229869	0.309444
	131516	0.25	0.7	9	0.435311	0.169823	0.271893	0.245239	0.380527	0.298258	0.395067	0.272282	0.322379	0.452545	0.481299	0.443805	0.469133	0.241481	0.318842
	131516	0.25	0.8	1.2	0.596028	0.135717	0.284413	0.225534	0.367759	0.2796	0.408823	0.276109	0.329608	0.354579	0.342451	0.337806	0.342479	0.43967	0.385036
	131516	0.25	0.8	10	0.439249	0.16652	0.270451	0.250592	0.377499	0.301225	0.396227	0.278402	0.327025	0.45091	0.477626	0.435308	0.476293	0.214542	0.29583
	131516	0.25	0.8	11	0.440087	0.166868	0.270992	0.251283	0.376285	0.301335	0.395368	0.279209	0.327287	0.458993	0.477276	0.442782	0.49993	0.215305	0.300985
	131516	0.25	0.8	13	0.436065	0.166446	0.26941	0.251553	0.373731	0.300705	0.392925	0.277664	0.325389	0.459178	0.477689	0.446634	0.451741	0.200949	0.278162
	131516	0.25	0.8	15	0.431205	0.166309	0.267794	0.254757	0.37213	0.302456	0.3898	0.279279	0.325412	0.462192	0.480725	0.452307	0.461226	0.212414	0.29087
	131516	0.25	0.8	2	0.580442	0.142298	0.287395	0.241457	0.405279	0.302619	0.446199	0.29188	0.352907	0.356703	0.337293	0.337686	0.400678	0.376813	0.388379
	131516	0.25	0.8	3	0.546254	0.149676	0.285939	0.248398	0.420963	0.312436	0.460055	0.295341	0.35974	0.371262	0.355196	0.351707	0.416074	0.380579	0.397536
	131516	0.25	0.8	4	0.514077	0.157836	0.284851	0.253026	0.41875	0.315446	0.449966	0.293022	0.354918	0.466109	0.478717	0.464639	0.436552	0.331835	0.377058
	131516	0.25	0.8	5	0.483912	0.161112	0.27922	0.252574	0.405944	0.311399	0.434128	0.289205	0.347149	0.4729	0.491917	0.467572	0.506027	0.326822	0.397145
	131516	0.25	0.8	6	0.466566	0.161806	0.27476	0.252312	0.39829	0.308924	0.424971	0.285325	0.341421	0.464286	0.489513	0.460691	0.459749	0.294002	0.358652
	131516	0.25	0.8	7	0.454584	0.163623	0.272727	0.250138	0.390161	0.304839	0.410099	0.280019	0.3328	0.463163	0.483691	0.45434	0.498958	0.254414	0.336997
	131516	0.25	0.8	8	0.444696	0.165878	0.271598	0.249622	0.387011	0.303492	0.403332	0.277662	0.328901	0.456592	0.478957	0.446427	0.473256	0.226474	0.306348
	131516	0.25	0.8	9	0.440171	0.165953	0.270273	0.249203	0.38352	0.302105	0.3988	0.276385	0.326495	0.451806	0.48217	0.443048	0.461166	0.240154	0.315836
	131516	0.3	0.6	1.2	0.592844	0.146849	0.295057	0.226337	0.380965	0.283966	0.42979	0.274848	0.335284	0.345246	0.330169	0.328847	0.369714	0.410649	0.389108
	131516	0.3	0.6	10	0.43221	0.171589	0.272328	0.240778	0.385434	0.296398	0.412046	0.268889	0.325419	0.453843	0.475697	0.439069	0.481892	0.217764	0.299973
	131516	0.3	0.6	11	0.430032	0.171647	0.271686	0.241389	0.382985	0.296132	0.410263	0.269761	0.325497	0.452848	0.475774	0.437661	0.495989	0.221719	0.306448
	131516	0.3	0.6	13	0.426512	0.171534	0.270484	0.239826	0.378946	0.293747	0.407061	0.267826	0.323081	0.454681	0.478329	0.445634	0.449245	0.215314	0.291107
	131516	0.3	0.6	15	0.424585	0.171842	0.270114	0.240782	0.376583	0.293746	0.402958	0.267051	0.321221	0.459807	0.479636	0.450404	0.452955	0.221651	0.297649
	131516	0.3	0.6	2	0.582118	0.152248	0.297702	0.235784	0.409867	0.299357	0.460137	0.28669	0.353273	0.348448	0.33268	0.331709	0.450073	0.427066	0.438268
	131516	0.3	0.6	3	0.543992	0.161121	0.296055	0.239562	0.426975	0.306921	0.475796	0.285619	0.356958	0.405397	0.38406	0.384187	0.394891	0.34471	0.368098
	131516	0.3	0.6	4	0.497738	0.166911	0.288233	0.242517	0.420749	0.307686	0.463309	0.282395	0.350906	0.468281	0.47894	0.465505	0.449791	0.31813	0.372674
	131516	0.3	0.6	5	0.469415	0.1706	0.282988	0.242475	0.410804	0.304953	0.445176	0.278494	0.342639	0.469729	0.486896	0.463131	0.494428	0.286549	0.362822
	131516	0.3	0.6	6	0.456259	0.171119	0.279418	0.240408	0.402513	0.301024	0.436885	0.2738	0.33663	0.470006	0.487081	0.460362	0.510496	0.279063	0.360861
	131516	0.3	0.6	7	0.443439	0.170654	0.275091	0.239076	0.394322	0.297674	0.421422	0.269505	0.328762	0.461683	0.483537	0.453139	0.479115	0.260898	0.337832
	131516	0.3	0.6	8	0.436316	0.171445	0.273503	0.239464	0.390431	0.296857	0.412729	0.267515	0.324623	0.459533	0.479235	0.445917	0.501259	0.226406	0.311924
	131516	0.3	0.6	9	0.430618	0.171568	0.271809	0.241059	0.388263	0.297445	0.410978	0.267925	0.32438	0.451373	0.486072	0.443029	0.483384	0.26429	0.341736
	131516	0.3	0.7	1.2	0.592425	0.143366	0.291433	0.230938	0.3831	0.288166	0.43078	0.280216	0.339556	0.345056	0.332359	0.329358	0.370958	0.432501	0.399373
	131516	0.3	0.7	10	0.436987	0.168328	0.271214	0.243645	0.385048	0.298445	0.411723	0.272505	0.327951	0.449809	0.479373	0.440987	0.461553	0.241811	0.317356
	131516	0.3	0.7	11	0.432713	0.168188	0.269773	0.244546	0.383859	0.29876	0.410604	0.273512	0.328322	0.455438	0.479263	0.440988	0.516274	0.237371	0.325216
	131516	0.3	0.7	13	0.429864	0.168361	0.269021	0.243986	0.380775	0.297406	0.408277	0.271947	0.32645	0.458322	0.479368	0.446529	0.490867	0.221493	0.305249
	131516	0.3	0.7	15	0.426596	0.168915	0.268437	0.244431	0.378408	0.29701	0.403741	0.27034	0.32384	0.457898	0.476335	0.446555	0.42594	0.1927	0.265352
	131516	0.3	0.7	2	0.582537	0.147309	0.292938	0.23843	0.410006	0.301518	0.457754	0.28967	0.354812	0.34655	0.327929	0.328866	0.419122	0.374788	0.395717
	131516	0.3	0.7	3	0.547763	0.156395	0.29269	0.243825	0.426134	0.310174	0.473698	0.291024	0.360543	0.407131	0.387662	0.386914	0.412231	0.379797	0.39535
	131516	0.3	0.7	4	0.50796	0.162396	0.287212	0.242916	0.419564	0.307689	0.458325	0.283417	0.350249	0.468659	0.478901	0.464052	0.461959	0.321469	0.379117
	131516	0.3	0.7	5	0.477124	0.165997	0.281427	0.244445	0.410586	0.306445	0.44217	0.280386	0.343166	0.471161	0.484068	0.459734	0.492953	0.261424	0.341659
	131516	0.3	0.7	6	0.462544	0.166502	0.277515	0.242286	0.402551	0.302503	0.434991	0.276189	0.33786	0.464968	0.490317	0.462399	0.469502	0.312034	0.374904
	131516	0.3	0.7	7	0.452572	0.166532	0.274532	0.242279	0.394789	0.300279	0.421738	0.27277	0.331278	0.463339	0.484237	0.454682	0.498687	0.280253	0.358843
	131516	0.3	0.7	8	0.443355	0.168046	0.272955	0.243157	0.391616	0.300026	0.413962	0.271829	0.328167	0.45591	0.480777	0.446669	0.480528	0.246552	0.325893
	131516	0.3	0.7	9	0.437406	0.167758	0.270884	0.244088	0.389264	0.300038	0.411374	0.271829	0.327351	0.449306	0.483991	0.444816	0.458738	0.275901	0.344567
	131516	0.3	0.8	1.2	0.592006	0.139109	0.286972	0.233693	0.383307	0.29036	0.428099	0.283798	0.341324	0.345571	0.328122	0.327614	0.370233	0.371273	0.370753
	131516	0.3	0.8	10	0.445701	0.165074	0.271245	0.250356	0.384752	0.303335	0.411492	0.279782	0.333089	0.452316	0.478166	0.440868	0.475821	0.233453	0.313227
	131516	0.3	0.8	11	0.440758	0.164488	0.269257	0.250404	0.382776	0.302753	0.409739	0.279948	0.332631	0.450063	0.478283	0.439385	0.488978	0.239523	0.321541
	131516	0.3	0.8	13	0.438244	0.164257	0.2683	0.249983	0.378093	0.300973	0.405942	0.27871	0.330504	0.460171	0.477704	0.44251	0.50237	0.210668	0.296852
	131516	0.3	0.8	15	0.435814	0.164913	0.268088	0.250593	0.377424	0.301201	0.402679	0.277435	0.328525	0.46106	0.479725	0.449622	0.474131	0.214609	0.295475
	131516	0.3	0.8	2	0.582035	0.142508	0.288001	0.240957	0.407521	0.302848	0.452303	0.292548	0.355293	0.345761	0.328116	0.327251	0.388671	0.389774	0.389222
	131516	0.3	0.8	3	0.553377	0.15062	0.288703	0.246892	0.422498	0.311661	0.464069	0.295536	0.361106	0.408848	0.386164	0.386998	0.454795	0.377105	0.412322
	131516	0.3	0.8	4	0.514496	0.156635	0.283881	0.246949	0.417881	0.310441	0.453556	0.288663	0.352793	0.463177	0.477814	0.462766	0.402018	0.331575	0.363414
	131516	0.3	0.8	5	0.490447	0.160315	0.280403	0.250095	0.409963	0.310668	0.441007	0.286477	0.347329	0.46512	0.491008	0.461777	0.453088	0.326239	0.37934
	131516	0.3	0.8	6	0.476957	0.161503	0.277543	0.248142	0.401687	0.306774	0.432909	0.28303	0.342282	0.460479	0.484936	0.453522	0.451042	0.27379	0.340743
	131516	0.3	0.8	7	0.46732	0.162111	0.275242	0.248469	0.393376	0.304565	0.420077	0.27992	0.335967	0.458815	0.482886	0.452425	0.447766	0.261698	0.330332
	131516	0.3	0.8	8	0.456678	0.163847	0.273543	0.248251	0.389811	0.303328	0.41344	0.278171	0.332578	0.454943	0.480072	0.446823	0.465062	0.242273	0.318582
	131516	0.3	0.8	9	0.447461	0.164246	0.271097	0.24911	0.388848	0.303675	0.412154	0.277894	0.331963	0.448899	0.478418	0.441173	0.457752	0.228695	0.305007
	131516	0.35	0.6	1.2	0.584381	0.147225	0.293318	0.229291	0.396065	0.290439	0.44569	0.278372	0.342699	0.379192	0.360386	0.359466	0.426621	0.387659	0.406208
	131516	0.35	0.6	10	0.433467	0.174104	0.274715	0.244705	0.390056	0.300739	0.416186	0.273383	0.329998	0.454681	0.478044	0.441096	0.492641	0.233119	0.31648
	131516	0.35	0.6	11	0.428524	0.175053	0.273888	0.24387	0.38873	0.299714	0.414105	0.272618	0.328786	0.443829	0.476538	0.431272	0.485813	0.236845	0.318442
	131516	0.35	0.6	13	0.424166	0.174485	0.272049	0.244688	0.384621	0.299097	0.412211	0.272375	0.328011	0.451473	0.476195	0.437935	0.474467	0.22023	0.300828
	131516	0.35	0.6	15	0.42249	0.175253	0.272108	0.244424	0.384361	0.298821	0.411763	0.271799	0.327451	0.455997	0.484656	0.447733	0.480156	0.25548	0.333508
	131516	0.35	0.6	2	0.572901	0.152125	0.295216	0.234591	0.415915	0.299981	0.468139	0.286518	0.355474	0.37684	0.365549	0.360102	0.389643	0.463668	0.423445
	131516	0.35	0.6	3	0.550109	0.159749	0.296445	0.243405	0.431645	0.311279	0.48071	0.290946	0.362495	0.391519	0.369678	0.370622	0.432905	0.358027	0.391922
	131516	0.35	0.6	4	0.503603	0.165448	0.288652	0.245135	0.425385	0.311033	0.466617	0.286182	0.354776	0.469149	0.47976	0.467047	0.457501	0.329321	0.38297
	131516	0.35	0.6	5	0.478214	0.168297	0.283693	0.246815	0.418071	0.310388	0.449606	0.282319	0.346845	0.466726	0.492759	0.464929	0.458668	0.341072	0.391224
	131516	0.35	0.6	6	0.46179	0.170657	0.280727	0.243022	0.409235	0.304951	0.442	0.276743	0.340373	0.468339	0.486031	0.459647	0.509084	0.267069	0.350345
	131516	0.35	0.6	7	0.449137	0.171674	0.277678	0.242459	0.402615	0.302656	0.428892	0.272406	0.33319	0.46035	0.485712	0.453562	0.465223	0.31898	0.378465
	131516	0.35	0.6	8	0.439165	0.172736	0.275426	0.244559	0.399421	0.30337	0.421316	0.27313	0.331412	0.459233	0.479342	0.446344	0.483661	0.234147	0.315538
	131516	0.35	0.6	9	0.435395	0.174116	0.275334	0.244895	0.394203	0.302108	0.416884	0.273546	0.330336	0.452166	0.477596	0.441041	0.47452	0.234238	0.313649
	131516	0.35	0.7	1.2	0.583794	0.145778	0.291727	0.2319	0.398522	0.293191	0.44532	0.28199	0.345316	0.37961	0.360466	0.360864	0.411837	0.391711	0.401522
	131516	0.35	0.7	10	0.439752	0.171655	0.274747	0.249681	0.392106	0.30509	0.418275	0.278851	0.334621	0.452037	0.476813	0.440143	0.481592	0.219592	0.301643
	131516	0.35	0.7	11	0.436903	0.172589	0.274599	0.248605	0.39151	0.304106	0.416817	0.278037	0.333568	0.449372	0.472685	0.42841	0.507919	0.231022	0.317591
	131516	0.35	0.7	13	0.431708	0.172127	0.272596	0.249386	0.387648	0.303513	0.414664	0.277902	0.33278	0.450091	0.47828	0.43922	0.465926	0.218003	0.297028
	131516	0.35	0.7	15	0.430367	0.17272	0.272641	0.249307	0.386866	0.303214	0.414443	0.277215	0.332216	0.458774	0.476092	0.441489	0.510177	0.202732	0.290161
	131516	0.35	0.7	2	0.573823	0.149598	0.292989	0.23789	0.418371	0.303313	0.466	0.289723	0.357302	0.379997	0.359885	0.35889	0.448693	0.38401	0.41384
	131516	0.35	0.7	3	0.555639	0.156815	0.295183	0.247182	0.431577	0.314333	0.477977	0.295822	0.365459	0.392075	0.373078	0.372578	0.418328	0.384845	0.400889
	131516	0.35	0.7	4	0.517681	0.161441	0.289093	0.248399	0.424108	0.313299	0.461766	0.290197	0.356409	0.469374	0.479319	0.466928	0.458652	0.332129	0.385269
	131516	0.35	0.7	5	0.488101	0.164262	0.283155	0.249367	0.417507	0.31224	0.447483	0.285646	0.348702	0.469257	0.489769	0.46523	0.468167	0.320228	0.380318
	131516	0.35	0.7	6	0.469918	0.166636	0.279831	0.247385	0.409377	0.308403	0.440831	0.28181	0.343824	0.464775	0.485269	0.45822	0.473693	0.27737	0.349873
	131516	0.35	0.7	7	0.457935	0.169646	0.278724	0.246361	0.403279	0.305868	0.43014	0.277127	0.337081	0.459497	0.482557	0.452769	0.467098	0.256408	0.331076
	131516	0.35	0.7	8	0.447545	0.170709	0.276405	0.247628	0.40087	0.306143	0.423286	0.27714	0.334966	0.456932	0.480328	0.447897	0.468725	0.247106	0.323609
	131516	0.35	0.7	9	0.443774	0.171785	0.276105	0.248608	0.397463	0.305888	0.420162	0.278141	0.334709	0.458452	0.478344	0.443017	0.517023	0.233814	0.322006
	131516	0.35	0.8	1.2	0.583459	0.141848	0.287684	0.234856	0.399042	0.295686	0.445713	0.286445	0.348756	0.380091	0.360342	0.358534	0.421589	0.397792	0.409345
	131516	0.35	0.8	10	0.45584	0.167025	0.275929	0.253746	0.39334	0.308486	0.420996	0.285876	0.340522	0.450842	0.481239	0.443617	0.47168	0.247297	0.324475
	131516	0.35	0.8	11	0.453662	0.167025	0.275269	0.252798	0.391754	0.307298	0.418258	0.285614	0.339437	0.447415	0.473626	0.428965	0.4921	0.233594	0.316805
	131516	0.35	0.8	13	0.444109	0.167008	0.272341	0.254907	0.388772	0.307919	0.417139	0.286688	0.339824	0.453682	0.47722	0.43837	0.49674	0.233014	0.317223
	131516	0.35	0.8	15	0.44126	0.168608	0.272764	0.254303	0.385863	0.306564	0.414247	0.285068	0.337726	0.455841	0.472621	0.437919	0.488182	0.208723	0.292421
	131516	0.35	0.8	2	0.573488	0.144832	0.2882	0.240364	0.416167	0.304727	0.463196	0.293692	0.359464	0.378295	0.363134	0.360536	0.411733	0.441296	0.426002
	131516	0.35	0.8	3	0.559661	0.150643	0.29036	0.24951	0.428995	0.315513	0.473811	0.300171	0.367513	0.3946	0.369366	0.370386	0.461411	0.3414	0.392435
	131516	0.35	0.8	4	0.524719	0.155714	0.285843	0.252571	0.425173	0.316894	0.461792	0.297362	0.36177	0.466918	0.477448	0.464446	0.434686	0.326617	0.372981
	131516	0.35	0.8	5	0.500838	0.158601	0.28184	0.253931	0.415618	0.315252	0.447964	0.29193	0.353494	0.465481	0.488308	0.461175	0.434584	0.308254	0.360677
	131516	0.35	0.8	6	0.486509	0.161733	0.280508	0.251081	0.406431	0.310403	0.441033	0.288306	0.348678	0.46218	0.48871	0.459416	0.434021	0.290487	0.348036
	131516	0.35	0.8	7	0.475365	0.164625	0.279744	0.250723	0.40017	0.30829	0.430562	0.283679	0.342017	0.460039	0.483561	0.453362	0.457084	0.268131	0.337992
	131516	0.35	0.8	8	0.463968	0.165854	0.277401	0.25191	0.398303	0.308627	0.423742	0.283822	0.339947	0.454203	0.480083	0.44681	0.443242	0.24593	0.31634
	131516	0.35	0.8	9	0.460449	0.166004	0.276471	0.252896	0.398255	0.309351	0.423057	0.285124	0.340658	0.442738	0.476092	0.437352	0.408053	0.230197	0.294344
	131516	0.4	0.6	1.2	0.570136	0.156743	0.29894	0.222183	0.405201	0.286997	0.46265	0.27724	0.346714	0.378824	0.364752	0.361235	0.381399	0.418065	0.398891
	131516	0.4	0.6	10	0.430786	0.177254	0.276331	0.23612	0.394456	0.295409	0.420889	0.269209	0.32838	0.462393	0.476604	0.439665	0.55272	0.237636	0.332372
	131516	0.4	0.6	11	0.425256	0.177229	0.274531	0.237058	0.392255	0.295519	0.41953	0.269741	0.32836	0.449997	0.472008	0.426914	0.514369	0.214557	0.302805
	131516	0.4	0.6	13	0.42249	0.17757	0.273901	0.236596	0.389783	0.294458	0.416698	0.269501	0.327312	0.456805	0.474303	0.435837	0.532405	0.209809	0.301
	131516	0.4	0.6	15	0.423663	0.178615	0.275086	0.23651	0.391487	0.294876	0.421171	0.269605	0.32876	0.461246	0.483525	0.447898	0.529541	0.261058	0.349711
	131516	0.4	0.6	2	0.561086	0.160698	0.300276	0.22621	0.416946	0.293296	0.476346	0.283345	0.355329	0.383113	0.363763	0.363885	0.444359	0.424142	0.434015
	131516	0.4	0.6	3	0.540389	0.164722	0.298352	0.234114	0.426897	0.302393	0.484276	0.286926	0.36035	0.391153	0.377048	0.372293	0.404449	0.402627	0.403536
	131516	0.4	0.6	4	0.492626	0.168545	0.288149	0.235598	0.419815	0.301817	0.463325	0.280401	0.349367	0.468288	0.482432	0.466692	0.448355	0.359696	0.399162
	131516	0.4	0.6	5	0.471761	0.171846	0.284728	0.234914	0.411795	0.299165	0.454227	0.278324	0.345156	0.470131	0.488775	0.46388	0.494831	0.307148	0.379028
	131516	0.4	0.6	6	0.461371	0.174449	0.2837	0.234658	0.407751	0.297885	0.44659	0.274022	0.339644	0.464201	0.484873	0.457924	0.466494	0.277712	0.348159
	131516	0.4	0.6	7	0.449807	0.175605	0.281049	0.234605	0.401526	0.296166	0.432149	0.270338	0.332608	0.470468	0.483501	0.453878	0.538173	0.254483	0.345562
	131516	0.4	0.6	8	0.441009	0.177445	0.27974	0.235907	0.402186	0.297382	0.427547	0.270185	0.331121	0.466299	0.479692	0.446917	0.551872	0.242552	0.336993
	131516	0.4	0.6	9	0.435981	0.177606	0.278268	0.237183	0.39813	0.297269	0.424255	0.270627	0.330458	0.457713	0.478604	0.443436	0.519506	0.24543	0.333367
	131516	0.4	0.7	1.2	0.569801	0.153005	0.295267	0.227547	0.407665	0.292069	0.459983	0.283028	0.350433	0.381099	0.366419	0.363781	0.416417	0.435055	0.425532
	131516	0.4	0.7	10	0.440506	0.170622	0.274154	0.242229	0.392932	0.299702	0.418315	0.275805	0.332431	0.454295	0.475719	0.435335	0.509717	0.226363	0.313502
	131516	0.4	0.7	11	0.436316	0.17069	0.272901	0.24331	0.390765	0.299892	0.417136	0.276055	0.332239	0.43885	0.475501	0.42876	0.468186	0.23938	0.316788
	131516	0.4	0.7	13	0.433467	0.17172	0.272828	0.242828	0.387863	0.298669	0.414507	0.275863	0.331263	0.444054	0.475719	0.436605	0.456373	0.224921	0.301332
	131516	0.4	0.7	15	0.431624	0.173711	0.273821	0.242688	0.389893	0.299163	0.419134	0.276171	0.332955	0.45792	0.477812	0.444567	0.502197	0.217383	0.303425
	131516	0.4	0.7	2	0.562008	0.156579	0.296646	0.230589	0.419358	0.297561	0.471897	0.287846	0.357578	0.380039	0.365327	0.362158	0.391745	0.433608	0.411615
	131516	0.4	0.7	3	0.548098	0.160021	0.296154	0.239722	0.428016	0.30732	0.479857	0.294907	0.365306	0.39508	0.37528	0.375444	0.446678	0.401637	0.422962
	131516	0.4	0.7	4	0.511312	0.162535	0.288281	0.240455	0.419993	0.305821	0.458997	0.287974	0.353907	0.468383	0.479584	0.46647	0.452551	0.332215	0.383157
	131516	0.4	0.7	5	0.492961	0.165377	0.285525	0.240939	0.411957	0.30405	0.447851	0.284968	0.348307	0.467039	0.489642	0.464518	0.464367	0.329658	0.385585
	131516	0.4	0.7	6	0.479973	0.167119	0.283218	0.23994	0.406225	0.301687	0.440742	0.280121	0.342537	0.464116	0.486743	0.458402	0.471583	0.298453	0.365555
	131516	0.4	0.7	7	0.467404	0.168179	0.28037	0.241569	0.401457	0.301635	0.428466	0.277397	0.336766	0.457362	0.486025	0.453318	0.455766	0.302926	0.363951
	131516	0.4	0.7	8	0.45936	0.169196	0.278787	0.242854	0.402009	0.302791	0.424844	0.277262	0.335542	0.455526	0.480065	0.447244	0.479595	0.254128	0.332219
	131516	0.4	0.7	9	0.453075	0.169803	0.277369	0.244254	0.397442	0.302563	0.422213	0.277674	0.335018	0.452897	0.477385	0.440161	0.499461	0.239392	0.323656
	131516	0.4	0.8	1.2	0.56913	0.144975	0.287245	0.230532	0.410028	0.295131	0.457389	0.287559	0.353115	0.382378	0.365212	0.363254	0.434093	0.42844	0.431248
	131516	0.4	0.8	10	0.462963	0.159757	0.271958	0.247709	0.391356	0.303388	0.416511	0.283901	0.337652	0.443576	0.476915	0.438182	0.439002	0.243055	0.312882
	131516	0.4	0.8	11	0.458522	0.160499	0.271279	0.24754	0.390013	0.302857	0.415211	0.282667	0.336352	0.443461	0.47482	0.429381	0.495444	0.232807	0.316766
	131516	0.4	0.8	13	0.455003	0.16203	0.271522	0.248134	0.387253	0.302463	0.412551	0.282668	0.335477	0.449409	0.475537	0.437266	0.499608	0.232673	0.317488
	131516	0.4	0.8	15	0.452572	0.163598	0.272103	0.248305	0.388566	0.30299	0.416696	0.283799	0.337641	0.456392	0.478171	0.444259	0.481264	0.227359	0.308824
	131516	0.4	0.8	2	0.562427	0.147447	0.287972	0.232871	0.420256	0.299683	0.467472	0.291219	0.358873	0.383078	0.361297	0.36209	0.447571	0.375602	0.408441
	131516	0.4	0.8	3	0.550109	0.150395	0.287635	0.241129	0.427019	0.308216	0.472956	0.297554	0.36529	0.392056	0.374855	0.37322	0.399273	0.393937	0.396587
	131516	0.4	0.8	4	0.524552	0.152224	0.282577	0.242851	0.418048	0.307228	0.454414	0.293814	0.356878	0.465928	0.476752	0.46273	0.435587	0.332976	0.377432
	131516	0.4	0.8	5	0.508882	0.15474	0.280614	0.244052	0.409007	0.305697	0.443909	0.290917	0.351487	0.46075	0.491419	0.459997	0.417181	0.340328	0.374856
	131516	0.4	0.8	6	0.492961	0.157028	0.278224	0.2438	0.404631	0.30427	0.438443	0.287048	0.346949	0.461993	0.491856	0.4611	0.475179	0.352877	0.404996
	131516	0.4	0.8	7	0.480644	0.157797	0.275398	0.246734	0.401627	0.305679	0.428885	0.284903	0.342372	0.45599	0.484229	0.452012	0.455744	0.282251	0.348604
	131516	0.4	0.8	8	0.471007	0.158992	0.273654	0.247338	0.400698	0.305871	0.424728	0.284176	0.340518	0.459425	0.480367	0.447185	0.511281	0.26537	0.349394
	131516	0.4	0.8	9	0.465477	0.159407	0.272397	0.247828	0.395058	0.304584	0.419767	0.283742	0.338604	0.450749	0.48028	0.440768	0.519119	0.266232	0.35196
	143472	0.2	0.6	1.2	0.606838	0.140669	0.29217	0.21324	0.372527	0.271226	0.405972	0.258931	0.316193	0.317326	0.305151	0.302461	0.385046	0.444265	0.412541
	143472	0.2	0.6	10	0.43992	0.171271	0.274491	0.24811	0.36975	0.296956	0.389247	0.273258	0.321099	0.458146	0.479114	0.444418	0.488609	0.232757	0.31531
	143472	0.2	0.6	11	0.44059	0.171121	0.27458	0.248363	0.368203	0.296637	0.383965	0.271705	0.318225	0.452739	0.479985	0.447205	0.422523	0.226538	0.294941
	143472	0.2	0.6	13	0.434305	0.172011	0.273323	0.247506	0.366444	0.295454	0.379586	0.268932	0.314819	0.459902	0.487143	0.457603	0.416877	0.248967	0.311751
	143472	0.2	0.6	15	0.431205	0.169632	0.270456	0.250406	0.366337	0.297476	0.377565	0.269072	0.314217	0.461978	0.481844	0.455018	0.425796	0.228303	0.297235
	143472	0.2	0.6	2	0.583962	0.15282	0.298732	0.233584	0.416057	0.299194	0.457608	0.282176	0.349091	0.320749	0.308996	0.305617	0.373194	0.437069	0.402614
	143472	0.2	0.6	3	0.540892	0.163383	0.297275	0.243424	0.423411	0.309127	0.465782	0.287596	0.355617	0.468424	0.443646	0.443577	0.454028	0.368262	0.406672
	143472	0.2	0.6	4	0.50486	0.168748	0.291881	0.250416	0.413856	0.312029	0.450146	0.286254	0.349962	0.468358	0.485996	0.465549	0.456268	0.323459	0.378553
	143472	0.2	0.6	5	0.479889	0.171788	0.287123	0.251848	0.402852	0.309935	0.440503	0.285872	0.346728	0.468592	0.483974	0.464079	0.464448	0.296133	0.361667
	143472	0.2	0.6	6	0.461706	0.172427	0.282154	0.250192	0.392642	0.305634	0.424797	0.280594	0.337956	0.467668	0.485874	0.46169	0.474464	0.273537	0.347015
	143472	0.2	0.6	7	0.452656	0.172128	0.279132	0.24852	0.387385	0.30279	0.41575	0.276095	0.331827	0.463602	0.486981	0.459692	0.44809	0.274542	0.340476
	143472	0.2	0.6	8	0.450478	0.172052	0.278398	0.248464	0.379999	0.300467	0.405348	0.275619	0.328127	0.461274	0.483672	0.453211	0.445029	0.268145	0.334651
	143472	0.2	0.6	9	0.443188	0.17198	0.276079	0.248985	0.375041	0.299281	0.397097	0.274743	0.324779	0.463285	0.482018	0.451498	0.495513	0.244992	0.327876
	143472	0.2	0.7	1.2	0.606502	0.139351	0.290717	0.219017	0.375285	0.276606	0.40764	0.265231	0.321365	0.317328	0.304171	0.302119	0.351311	0.42502	0.384666
	143472	0.2	0.7	10	0.445785	0.170302	0.275532	0.256404	0.374097	0.304266	0.393061	0.280582	0.327431	0.457044	0.481837	0.446576	0.478267	0.253171	0.331083
	143472	0.2	0.7	11	0.44612	0.170289	0.275625	0.255737	0.374093	0.303794	0.389391	0.278019	0.324413	0.455603	0.478967	0.446454	0.43958	0.229778	0.301799
	143472	0.2	0.7	13	0.43816	0.171563	0.274175	0.254782	0.370704	0.302001	0.382789	0.274995	0.32006	0.461554	0.481054	0.453764	0.449673	0.215094	0.290995
	143472	0.2	0.7	15	0.435311	0.169135	0.271342	0.257363	0.370258	0.303657	0.38066	0.275149	0.319417	0.460525	0.484306	0.45615	0.425055	0.23697	0.304295
	143472	0.2	0.7	2	0.585638	0.148986	0.295384	0.236918	0.413051	0.30112	0.452932	0.285224	0.350027	0.322437	0.307522	0.30652	0.415382	0.422111	0.418719
	143472	0.2	0.7	3	0.543405	0.15951	0.294412	0.245829	0.417639	0.309488	0.459744	0.289915	0.355593	0.466205	0.443415	0.442658	0.426005	0.371174	0.396704
	143472	0.2	0.7	4	0.507206	0.165371	0.289615	0.253043	0.410136	0.312983	0.445963	0.289248	0.350903	0.468088	0.483482	0.463715	0.449291	0.313457	0.369279
	143472	0.2	0.7	5	0.481984	0.168691	0.285143	0.256426	0.401765	0.313049	0.439463	0.29031	0.349644	0.464332	0.485056	0.463484	0.415211	0.303027	0.350358
	143472	0.2	0.7	6	0.463466	0.169543	0.280317	0.255292	0.393918	0.309804	0.424318	0.285128	0.341069	0.471108	0.488967	0.464737	0.512151	0.290707	0.37089
	143472	0.2	0.7	7	0.456427	0.170975	0.279352	0.253566	0.3892	0.307073	0.415898	0.280947	0.335355	0.464055	0.487548	0.45912	0.474278	0.268877	0.343192
	143472	0.2	0.7	8	0.454667	0.170626	0.278529	0.254509	0.384039	0.306137	0.407858	0.28138	0.333014	0.46509	0.485511	0.457687	0.463617	0.2651	0.337318
	143472	0.2	0.7	9	0.447796	0.170579	0.276377	0.256483	0.378983	0.305926	0.399854	0.281368	0.330307	0.456516	0.485597	0.453176	0.443974	0.271222	0.336734
	143472	0.2	0.8	1.2	0.604491	0.13621	0.286945	0.221765	0.375835	0.278939	0.403713	0.268341	0.322393	0.318378	0.30558	0.30271	0.39588	0.436995	0.415423
	143472	0.2	0.8	10	0.450226	0.168935	0.275788	0.258614	0.370535	0.304619	0.38937	0.28298	0.327758	0.453601	0.477352	0.440917	0.457215	0.21153	0.289242
	143472	0.2	0.8	11	0.450645	0.16902	0.275986	0.258502	0.370824	0.304639	0.38618	0.281409	0.325573	0.455185	0.481917	0.448694	0.429853	0.234049	0.303077
	143472	0.2	0.8	13	0.444193	0.169458	0.274358	0.257273	0.367004	0.302494	0.377937	0.278013	0.320364	0.464668	0.483271	0.456667	0.470498	0.221434	0.30114
	143472	0.2	0.8	15	0.441009	0.166815	0.271232	0.25988	0.366063	0.303965	0.375068	0.277804	0.319191	0.462287	0.481833	0.455395	0.415974	0.22015	0.287921
	143472	0.2	0.8	2	0.584129	0.144847	0.290877	0.238108	0.409451	0.301111	0.444278	0.286309	0.348215	0.320943	0.306884	0.305534	0.372127	0.40981	0.39006
	143472	0.2	0.8	3	0.545919	0.153151	0.289151	0.247124	0.415289	0.30986	0.45104	0.291677	0.354261	0.46534	0.440775	0.440845	0.411862	0.341831	0.373593
	143472	0.2	0.8	4	0.513323	0.160769	0.287274	0.255644	0.405169	0.313489	0.438801	0.294087	0.352157	0.466224	0.487818	0.465626	0.433142	0.343414	0.383094
	143472	0.2	0.8	5	0.491537	0.164727	0.284551	0.257898	0.397708	0.312895	0.433272	0.291132	0.348257	0.472681	0.484231	0.465592	0.510501	0.311001	0.386527
	143472	0.2	0.8	6	0.471175	0.165329	0.279104	0.258087	0.390995	0.310934	0.419984	0.289483	0.342731	0.46594	0.486407	0.46175	0.446925	0.289193	0.35116
	143472	0.2	0.8	7	0.463633	0.167563	0.278725	0.256224	0.385536	0.307852	0.412665	0.284324	0.336678	0.4639	0.484353	0.457453	0.462817	0.26329	0.335639
	143472	0.2	0.8	8	0.460784	0.167845	0.278102	0.256574	0.379815	0.306261	0.403335	0.283644	0.333063	0.458241	0.484971	0.455805	0.410704	0.265041	0.322173
	143472	0.2	0.8	9	0.453746	0.16875	0.276712	0.258538	0.375794	0.306329	0.396793	0.283925	0.331002	0.459329	0.479959	0.448318	0.473379	0.232986	0.312276
	143472	0.25	0.6	1.2	0.59762	0.143049	0.292385	0.220598	0.375225	0.277848	0.420541	0.269593	0.328559	0.358	0.344342	0.34157	0.347817	0.424128	0.382201
	143472	0.25	0.6	10	0.43154	0.174929	0.274752	0.246753	0.387892	0.301629	0.405709	0.271228	0.32511	0.453399	0.478931	0.444236	0.450887	0.248552	0.320454
	143472	0.25	0.6	11	0.428859	0.174951	0.273915	0.245724	0.386668	0.30049	0.401537	0.269435	0.322482	0.449307	0.474694	0.430863	0.48806	0.221491	0.304702
	143472	0.25	0.6	13	0.427434	0.175142	0.273609	0.247816	0.384343	0.301337	0.398123	0.270641	0.322232	0.457208	0.475643	0.444034	0.470322	0.210932	0.291246
	143472	0.25	0.6	15	0.426177	0.175215	0.273263	0.250628	0.384679	0.303511	0.396985	0.270605	0.321832	0.454088	0.482809	0.448244	0.431946	0.246738	0.314071
	143472	0.25	0.6	2	0.579772	0.153397	0.29822	0.233728	0.415028	0.299045	0.46622	0.285724	0.354309	0.358982	0.346036	0.341969	0.386091	0.444297	0.413154
	143472	0.25	0.6	3	0.545249	0.161782	0.297004	0.240825	0.430901	0.30897	0.485478	0.289825	0.362964	0.373735	0.353043	0.354053	0.457297	0.367206	0.40733
	143472	0.25	0.6	4	0.505111	0.169311	0.29244	0.244581	0.424235	0.310279	0.472304	0.283869	0.354608	0.468526	0.488574	0.465834	0.458894	0.348796	0.396341
	143472	0.25	0.6	5	0.481063	0.172237	0.287848	0.24694	0.415044	0.309648	0.456573	0.282683	0.349176	0.469948	0.485397	0.466246	0.483841	0.318375	0.384043
	143472	0.25	0.6	6	0.466147	0.173048	0.284017	0.248824	0.40896	0.309399	0.443839	0.280252	0.343567	0.465216	0.484166	0.458954	0.459624	0.279726	0.347789
	143472	0.25	0.6	7	0.451986	0.172949	0.27959	0.245507	0.39985	0.304222	0.432901	0.276074	0.337142	0.46474	0.486587	0.459758	0.472668	0.280352	0.351952
	143472	0.25	0.6	8	0.442014	0.173975	0.277307	0.244735	0.394927	0.302199	0.421759	0.273394	0.331744	0.463712	0.48477	0.457081	0.473926	0.26151	0.337042
	143472	0.25	0.6	9	0.435646	0.17438	0.275623	0.24656	0.389825	0.302067	0.411171	0.272569	0.327822	0.46149	0.481847	0.451349	0.496392	0.258169	0.339675
	143472	0.25	0.7	1.2	0.597117	0.140109	0.289243	0.226685	0.375684	0.282757	0.420928	0.277286	0.334332	0.360528	0.346416	0.344063	0.383694	0.43581	0.408095
	143472	0.25	0.7	10	0.449137	0.169829	0.276182	0.251159	0.387829	0.304878	0.406611	0.277363	0.329775	0.45247	0.477083	0.442528	0.454432	0.224972	0.300954
	143472	0.25	0.7	11	0.43883	0.171124	0.274033	0.250567	0.386098	0.303907	0.402769	0.275932	0.327499	0.44732	0.479285	0.438735	0.463722	0.248399	0.323507
	143472	0.25	0.7	13	0.436149	0.171213	0.273266	0.252761	0.384787	0.305104	0.398924	0.276831	0.326848	0.460619	0.480326	0.446636	0.515647	0.235613	0.323438
	143472	0.25	0.7	15	0.435981	0.170516	0.272657	0.255634	0.383836	0.306884	0.396305	0.2767	0.325874	0.459265	0.48085	0.448883	0.450601	0.226065	0.301079
	143472	0.25	0.7	2	0.579521	0.147921	0.292785	0.236342	0.410525	0.299983	0.4603	0.289714	0.355607	0.359137	0.341228	0.340693	0.396604	0.392408	0.394495
	143472	0.25	0.7	3	0.550444	0.155608	0.292666	0.244235	0.425369	0.310303	0.476934	0.294333	0.364018	0.372388	0.352915	0.353498	0.427974	0.377132	0.400947
	143472	0.25	0.7	4	0.512234	0.163152	0.289088	0.248592	0.422174	0.312923	0.469659	0.289689	0.358347	0.464555	0.489022	0.464773	0.430539	0.357159	0.390431
	143472	0.25	0.7	5	0.490364	0.165914	0.285233	0.251369	0.413748	0.312737	0.454053	0.288394	0.352742	0.467287	0.485756	0.464972	0.447496	0.331316	0.380741
	143472	0.25	0.7	6	0.474024	0.167658	0.281911	0.252633	0.405875	0.311424	0.440132	0.284067	0.345284	0.467403	0.486278	0.46163	0.463423	0.292435	0.358589
	143472	0.25	0.7	7	0.465644	0.16745	0.279235	0.250829	0.399142	0.308064	0.430388	0.281952	0.340705	0.465236	0.484331	0.457826	0.468617	0.274009	0.345814
	143472	0.25	0.7	8	0.460365	0.168697	0.278679	0.25158	0.396806	0.307929	0.421956	0.280908	0.33728	0.462704	0.483864	0.456225	0.47578	0.272743	0.346724
	143472	0.25	0.7	9	0.454248	0.169151	0.277194	0.249832	0.390421	0.304691	0.411947	0.277805	0.331832	0.458681	0.481873	0.450958	0.474222	0.262748	0.338144
	143472	0.25	0.8	1.2	0.595777	0.138792	0.287557	0.229077	0.375475	0.28455	0.417059	0.279037	0.334365	0.357234	0.340174	0.339266	0.336918	0.375583	0.355202
	143472	0.25	0.8	10	0.451902	0.170201	0.277334	0.254322	0.386345	0.30673	0.404311	0.280346	0.331106	0.456641	0.47568	0.440234	0.474831	0.217047	0.297916
	143472	0.25	0.8	11	0.440841	0.171569	0.275018	0.253688	0.38318	0.305269	0.398335	0.278971	0.328135	0.444556	0.477304	0.436982	0.440727	0.231032	0.303151
	143472	0.25	0.8	13	0.437741	0.171926	0.274334	0.255563	0.379705	0.305504	0.393175	0.279368	0.326642	0.457666	0.478667	0.445724	0.45185	0.22936	0.304272
	143472	0.25	0.8	15	0.437657	0.170831	0.273433	0.258291	0.378218	0.306957	0.389821	0.279393	0.325496	0.460872	0.479511	0.44859	0.466665	0.220061	0.299086
	143472	0.25	0.8	2	0.578515	0.145605	0.290232	0.237536	0.408337	0.300352	0.451808	0.290975	0.353979	0.359244	0.345253	0.340803	0.394413	0.432303	0.412489
	143472	0.25	0.8	3	0.552204	0.153072	0.290735	0.246029	0.423269	0.311181	0.466481	0.296671	0.362684	0.373076	0.354478	0.354671	0.429065	0.387124	0.407017
	143472	0.25	0.8	4	0.514664	0.161051	0.287901	0.249979	0.419299	0.313221	0.459233	0.291145	0.356363	0.468118	0.486018	0.465685	0.460312	0.338957	0.390421
	143472	0.25	0.8	5	0.49271	0.164839	0.284987	0.252746	0.4114	0.313123	0.44645	0.289961	0.351579	0.466714	0.490087	0.466338	0.445025	0.351914	0.39303
	143472	0.25	0.8	6	0.477795	0.166424	0.281986	0.25474	0.405458	0.312895	0.435493	0.286471	0.345602	0.466473	0.48473	0.460042	0.457299	0.275215	0.343626
	143472	0.25	0.8	7	0.467655	0.167274	0.27969	0.252345	0.398088	0.308888	0.426175	0.28375	0.340676	0.465445	0.486661	0.460123	0.478123	0.283772	0.356159
	143472	0.25	0.8	8	0.46246	0.168607	0.279238	0.253731	0.395548	0.309152	0.418406	0.282975	0.337615	0.463013	0.485317	0.456479	0.477016	0.274105	0.348153
	143472	0.25	0.8	9	0.456343	0.168629	0.277403	0.252543	0.389583	0.30644	0.409574	0.280364	0.33287	0.455396	0.47724	0.444888	0.447941	0.22412	0.298761
	143472	0.3	0.6	1.2	0.593347	0.151185	0.299508	0.228667	0.38924	0.288089	0.43368	0.277432	0.33839	0.353439	0.337755	0.336508	0.362905	0.396821	0.379106
	143472	0.3	0.6	10	0.433048	0.176103	0.276154	0.240231	0.386787	0.296381	0.412777	0.270101	0.326534	0.456768	0.481305	0.446641	0.498299	0.251182	0.334001
	143472	0.3	0.6	11	0.43221	0.175599	0.275492	0.240671	0.384635	0.29608	0.409269	0.27026	0.325547	0.450565	0.476327	0.436737	0.46228	0.215004	0.293502
	143472	0.3	0.6	13	0.42735	0.175774	0.274075	0.241902	0.382335	0.296322	0.403314	0.269513	0.32311	0.459578	0.481889	0.448439	0.492659	0.234811	0.318038
	143472	0.3	0.6	15	0.427937	0.174826	0.273522	0.245379	0.380887	0.298472	0.400577	0.270071	0.322626	0.456806	0.479607	0.449018	0.462353	0.214337	0.292894
	143472	0.3	0.6	2	0.577593	0.15849	0.30256	0.236155	0.417603	0.301698	0.466391	0.287732	0.355899	0.354762	0.339227	0.337937	0.409407	0.399058	0.404166
	143472	0.3	0.6	3	0.540892	0.165384	0.29909	0.235935	0.426688	0.303855	0.481453	0.28496	0.358018	0.39168	0.369628	0.370549	0.47141	0.372926	0.416424
	143472	0.3	0.6	4	0.499749	0.171514	0.29277	0.242599	0.425521	0.309019	0.469549	0.284823	0.354569	0.465404	0.484916	0.463837	0.425166	0.306739	0.356371
	143472	0.3	0.6	5	0.474359	0.17386	0.287179	0.244974	0.414525	0.307954	0.453447	0.281808	0.347594	0.466087	0.484356	0.463073	0.444227	0.299095	0.357493
	143472	0.3	0.6	6	0.456595	0.174967	0.282647	0.239949	0.409233	0.302519	0.439389	0.274192	0.337668	0.465515	0.488498	0.46218	0.465633	0.282293	0.351492
	143472	0.3	0.6	7	0.447629	0.17553	0.280307	0.23827	0.401195	0.298977	0.430046	0.27083	0.332354	0.466644	0.48415	0.457984	0.492796	0.254096	0.335302
	143472	0.3	0.6	8	0.444528	0.175922	0.279647	0.24051	0.395778	0.2992	0.424888	0.272422	0.331987	0.468535	0.482642	0.455223	0.524673	0.247155	0.336022
	143472	0.3	0.6	9	0.437908	0.176009	0.277625	0.239912	0.390783	0.297302	0.418159	0.271201	0.329016	0.456409	0.484726	0.450513	0.452956	0.241409	0.314957
	143472	0.3	0.7	1.2	0.592257	0.14802	0.296085	0.235121	0.390376	0.293481	0.433278	0.284013	0.343115	0.352798	0.338513	0.33584	0.344913	0.410082	0.374685
	143472	0.3	0.7	10	0.451148	0.172135	0.278672	0.248829	0.388656	0.303407	0.414048	0.278557	0.33305	0.458165	0.485088	0.447213	0.479322	0.284848	0.357339
	143472	0.3	0.7	11	0.449975	0.171943	0.278155	0.248889	0.386131	0.30268	0.410803	0.278551	0.331991	0.458977	0.476847	0.438854	0.549757	0.238336	0.332516
	143472	0.3	0.7	13	0.443607	0.171931	0.27617	0.250049	0.38331	0.302661	0.403506	0.277694	0.328981	0.454132	0.481072	0.448141	0.453903	0.246515	0.319507
	143472	0.3	0.7	15	0.442014	0.171173	0.275065	0.252808	0.380904	0.30391	0.399938	0.277759	0.327835	0.460217	0.48208	0.451624	0.482083	0.233048	0.314204
	143472	0.3	0.7	2	0.578348	0.153048	0.297515	0.240538	0.415192	0.304605	0.461114	0.292125	0.357663	0.354538	0.34226	0.338062	0.402791	0.451041	0.425553
	143472	0.3	0.7	3	0.548433	0.160235	0.296442	0.242655	0.425032	0.308936	0.476145	0.292236	0.362181	0.390855	0.371881	0.3713	0.438311	0.417019	0.4274
	143472	0.3	0.7	4	0.513323	0.165831	0.291762	0.248819	0.424806	0.313824	0.46392	0.290496	0.357274	0.467888	0.485224	0.465376	0.45772	0.327097	0.381538
	143472	0.3	0.7	5	0.492626	0.168541	0.288145	0.251207	0.416368	0.313357	0.451921	0.287553	0.351469	0.465335	0.488418	0.464457	0.447176	0.330118	0.379832
	143472	0.3	0.7	6	0.476202	0.170012	0.284535	0.247941	0.409809	0.308958	0.439291	0.281541	0.343155	0.464554	0.489427	0.46245	0.461583	0.3014	0.364677
	143472	0.3	0.7	7	0.467404	0.17121	0.282886	0.24706	0.402828	0.306276	0.430299	0.278991	0.338506	0.463196	0.484852	0.457707	0.456631	0.270461	0.339711
	143472	0.3	0.7	8	0.463131	0.171049	0.281457	0.248258	0.398807	0.306019	0.425832	0.279656	0.3376	0.461749	0.48599	0.456515	0.485303	0.285796	0.35974
	143472	0.3	0.7	9	0.456595	0.17142	0.279766	0.24816	0.394605	0.3047	0.420791	0.279285	0.335737	0.455396	0.479695	0.447881	0.450308	0.235772	0.309498
	143472	0.3	0.8	1.2	0.590917	0.146883	0.294611	0.237233	0.387861	0.294399	0.428538	0.286678	0.34354	0.355349	0.338381	0.33809	0.397303	0.40288	0.400072
	143472	0.3	0.8	10	0.453829	0.171761	0.279196	0.252431	0.382342	0.304093	0.408528	0.281964	0.333647	0.451285	0.478291	0.443605	0.45534	0.231624	0.307055
	143472	0.3	0.8	11	0.452824	0.171969	0.279055	0.253002	0.379465	0.303591	0.404753	0.282432	0.332706	0.447732	0.478436	0.438923	0.469395	0.237775	0.315653
	143472	0.3	0.8	13	0.445701	0.172	0.276877	0.253986	0.376771	0.303428	0.397105	0.281766	0.329637	0.453889	0.480439	0.443916	0.441819	0.242405	0.313053
	143472	0.3	0.8	15	0.443355	0.171466	0.275718	0.25637	0.37506	0.30456	0.394398	0.281375	0.328435	0.45804	0.47904	0.448826	0.443198	0.208406	0.283501
	143472	0.3	0.8	2	0.577091	0.151107	0.295301	0.241657	0.409336	0.303902	0.452478	0.293779	0.356254	0.355861	0.337982	0.336978	0.423603	0.3801	0.400674
	143472	0.3	0.8	3	0.553461	0.158343	0.296035	0.245222	0.419724	0.309576	0.466254	0.297084	0.362923	0.390367	0.37244	0.371104	0.420769	0.408876	0.414738
	143472	0.3	0.8	4	0.518686	0.164841	0.292405	0.251408	0.419942	0.314521	0.456396	0.295217	0.358524	0.467274	0.484917	0.464681	0.461585	0.331198	0.385669
	143472	0.3	0.8	5	0.49757	0.166867	0.288146	0.254781	0.410073	0.314291	0.444508	0.291701	0.352246	0.468499	0.48853	0.466662	0.471466	0.337269	0.393234
	143472	0.3	0.8	6	0.480476	0.168609	0.284627	0.251482	0.403288	0.309787	0.43418	0.285113	0.344201	0.469113	0.488654	0.463898	0.492048	0.297334	0.370676
	143472	0.3	0.8	7	0.473353	0.170328	0.283946	0.251824	0.396295	0.307957	0.426048	0.283608	0.340533	0.46562	0.484441	0.45777	0.486774	0.260955	0.339765
	143472	0.3	0.8	8	0.466734	0.169385	0.281172	0.251772	0.390967	0.306297	0.419574	0.283136	0.338109	0.464029	0.483344	0.454797	0.502844	0.262504	0.344937
	143472	0.3	0.8	9	0.459946	0.170569	0.280094	0.251713	0.388609	0.305527	0.415473	0.282871	0.336582	0.461841	0.479944	0.448224	0.485582	0.242863	0.323785
	143472	0.35	0.6	1.2	0.58237	0.151621	0.297152	0.226465	0.398505	0.288805	0.444204	0.277456	0.341565	0.356714	0.343926	0.340457	0.39342	0.442926	0.416708
	143472	0.35	0.6	10	0.434808	0.177543	0.277844	0.240941	0.394577	0.299188	0.415132	0.268443	0.326049	0.460949	0.478632	0.446164	0.500499	0.234166	0.319057
	143472	0.35	0.6	11	0.430199	0.178511	0.27712	0.240672	0.393386	0.298638	0.410432	0.267655	0.324012	0.450434	0.476611	0.438448	0.478423	0.221384	0.302698
	143472	0.35	0.6	13	0.425339	0.178127	0.275254	0.24297	0.38888	0.299078	0.409784	0.270746	0.326061	0.454019	0.477572	0.442919	0.464776	0.210519	0.289782
	143472	0.35	0.6	15	0.424669	0.177534	0.274578	0.242883	0.388145	0.298794	0.411059	0.270401	0.326214	0.459252	0.476582	0.444174	0.472502	0.212581	0.293234
	143472	0.35	0.6	2	0.568795	0.157535	0.299341	0.230049	0.418902	0.296996	0.467888	0.284093	0.353529	0.357767	0.342183	0.340879	0.415746	0.422549	0.41912
	143472	0.35	0.6	3	0.545584	0.163983	0.299109	0.237717	0.426159	0.305193	0.478253	0.288229	0.359686	0.397601	0.384442	0.378489	0.439075	0.441515	0.440291
	143472	0.35	0.6	4	0.500922	0.168533	0.290555	0.240673	0.420457	0.30612	0.460925	0.28329	0.350908	0.470471	0.485294	0.465901	0.486494	0.314596	0.382102
	143472	0.35	0.6	5	0.480476	0.171307	0.286895	0.24191	0.412892	0.305077	0.449579	0.279576	0.34476	0.473114	0.480698	0.462347	0.510089	0.284595	0.36535
	143472	0.35	0.6	6	0.464471	0.172102	0.28273	0.238787	0.408743	0.301461	0.440569	0.272638	0.336833	0.471183	0.489956	0.465754	0.498031	0.303936	0.377496
	143472	0.35	0.6	7	0.453578	0.173516	0.28054	0.239452	0.405939	0.301222	0.430726	0.269961	0.331901	0.459323	0.484522	0.456114	0.426225	0.260626	0.323463
	143472	0.35	0.6	8	0.44612	0.176471	0.280584	0.239392	0.40205	0.300098	0.425843	0.269338	0.329974	0.461678	0.485616	0.456847	0.461308	0.277671	0.346672
	143472	0.35	0.6	9	0.437992	0.177513	0.278836	0.239759	0.399037	0.299541	0.419203	0.268412	0.327273	0.458291	0.480021	0.448946	0.474831	0.227996	0.308069
	143472	0.35	0.7	1.2	0.581699	0.148404	0.293814	0.231092	0.401161	0.293253	0.44426	0.281752	0.344818	0.357885	0.338689	0.339165	0.394644	0.382643	0.388551
	143472	0.35	0.7	10	0.439752	0.172595	0.275498	0.245981	0.397123	0.303791	0.419296	0.273738	0.331231	0.457303	0.477391	0.443679	0.497194	0.228983	0.313557
	143472	0.35	0.7	11	0.43573	0.173857	0.275235	0.245602	0.397852	0.303715	0.415845	0.273084	0.329673	0.454233	0.481136	0.440846	0.538164	0.24016	0.332112
	143472	0.35	0.7	13	0.431959	0.17382	0.274013	0.246896	0.392694	0.303178	0.414287	0.2753	0.330787	0.463683	0.480912	0.447365	0.513199	0.240272	0.327305
	143472	0.35	0.7	15	0.430367	0.173428	0.273199	0.246264	0.392175	0.302546	0.415397	0.274632	0.330657	0.459252	0.477888	0.445204	0.490195	0.220257	0.303944
	143472	0.35	0.7	2	0.570639	0.152771	0.295258	0.234436	0.421445	0.30128	0.46505	0.287987	0.355702	0.357236	0.339862	0.339576	0.417219	0.373002	0.393874
	143472	0.35	0.7	3	0.550779	0.158599	0.295555	0.242759	0.427346	0.30963	0.473385	0.293826	0.362594	0.401476	0.378304	0.378683	0.470537	0.364742	0.41094
	143472	0.35	0.7	4	0.507877	0.16344	0.28811	0.245641	0.422991	0.310795	0.458619	0.28901	0.354576	0.467184	0.489349	0.466644	0.447964	0.353292	0.395035
	143472	0.35	0.7	5	0.487515	0.165889	0.284383	0.246486	0.415335	0.309371	0.447835	0.284167	0.347704	0.470865	0.484724	0.465568	0.482678	0.303043	0.372326
	143472	0.35	0.7	6	0.47151	0.166461	0.280157	0.245264	0.409421	0.306762	0.440262	0.279313	0.341787	0.465708	0.486428	0.460475	0.454575	0.287502	0.352231
	143472	0.35	0.7	7	0.461706	0.168715	0.279099	0.246301	0.406924	0.306864	0.432879	0.276584	0.337516	0.468679	0.481724	0.455831	0.503399	0.238264	0.323441
	143472	0.35	0.7	8	0.454416	0.170512	0.278359	0.245947	0.404134	0.305794	0.428911	0.275783	0.33571	0.464118	0.485049	0.457463	0.469806	0.260819	0.335423
	143472	0.35	0.7	9	0.444528	0.171598	0.276189	0.245042	0.401944	0.304468	0.422978	0.274138	0.332669	0.462472	0.479207	0.448155	0.495669	0.231863	0.315938
	143472	0.35	0.8	1.2	0.580526	0.13961	0.284688	0.233914	0.40005	0.295213	0.439592	0.286072	0.346593	0.355033	0.340183	0.337773	0.358406	0.401442	0.378705
	143472	0.35	0.8	10	0.458857	0.163465	0.273874	0.250345	0.393447	0.305991	0.416675	0.281777	0.336199	0.452767	0.482598	0.4467	0.453403	0.277124	0.343995
	143472	0.35	0.8	11	0.455421	0.16414	0.273409	0.250573	0.392838	0.305977	0.412441	0.28171	0.334766	0.452217	0.479367	0.441045	0.481388	0.251035	0.329988
	143472	0.35	0.8	13	0.451567	0.164148	0.272257	0.252152	0.389277	0.306057	0.411201	0.282811	0.33513	0.452303	0.478582	0.444152	0.481626	0.237794	0.318389
	143472	0.35	0.8	15	0.446204	0.165282	0.271569	0.251518	0.387141	0.304929	0.410485	0.281944	0.334284	0.456018	0.481361	0.44929	0.466102	0.245687	0.321768
	143472	0.35	0.8	2	0.57089	0.14258	0.285302	0.236312	0.418435	0.302044	0.457413	0.290745	0.355515	0.355948	0.340949	0.339092	0.382803	0.403898	0.393068
	143472	0.35	0.8	3	0.554131	0.147489	0.285881	0.244273	0.424007	0.30997	0.462669	0.297055	0.361811	0.398313	0.378935	0.378334	0.417879	0.379462	0.397745
	143472	0.35	0.8	4	0.526479	0.152119	0.282998	0.248779	0.420969	0.31274	0.45095	0.295435	0.356991	0.46955	0.488617	0.466524	0.492582	0.362932	0.417933
	143472	0.35	0.8	5	0.499162	0.154598	0.277794	0.250373	0.414221	0.3121	0.442894	0.290324	0.350735	0.468655	0.48651	0.466518	0.442798	0.320376	0.371768
	143472	0.35	0.8	6	0.485587	0.156166	0.275377	0.247402	0.405559	0.307327	0.434093	0.28351	0.343002	0.463748	0.483153	0.45735	0.436658	0.26363	0.328768
	143472	0.35	0.8	7	0.477376	0.158661	0.275211	0.248781	0.403116	0.30768	0.427887	0.281343	0.339475	0.46158	0.487657	0.458432	0.443285	0.297692	0.356185
	143472	0.35	0.8	8	0.470756	0.160148	0.274573	0.249447	0.400476	0.307413	0.42541	0.281484	0.338795	0.463807	0.485957	0.45664	0.478572	0.279921	0.353232
	143472	0.35	0.8	9	0.461287	0.161634	0.273057	0.248435	0.399184	0.306264	0.421672	0.280703	0.337041	0.461048	0.482227	0.450452	0.48413	0.261699	0.339747
	143472	0.4	0.6	1.2	0.570471	0.155811	0.298137	0.220029	0.405399	0.285243	0.463799	0.27651	0.346463	0.376615	0.356636	0.35696	0.427281	0.369163	0.396102
	143472	0.4	0.6	10	0.430786	0.175772	0.275173	0.235761	0.399082	0.296413	0.42384	0.268428	0.32869	0.464749	0.477636	0.44423	0.533463	0.234758	0.326038
	143472	0.4	0.6	11	0.426512	0.176334	0.274242	0.236302	0.396832	0.296216	0.421505	0.268481	0.328024	0.447664	0.475514	0.43593	0.496858	0.228705	0.313229
	143472	0.4	0.6	13	0.424166	0.176706	0.273775	0.235552	0.395114	0.295148	0.420184	0.268952	0.327974	0.452476	0.481249	0.443326	0.476887	0.250764	0.328691
	143472	0.4	0.6	15	0.424669	0.177611	0.274638	0.234139	0.392645	0.29335	0.421039	0.267456	0.327117	0.454513	0.476676	0.441944	0.488052	0.224495	0.307531
	143472	0.4	0.6	2	0.560918	0.159568	0.299173	0.224514	0.419987	0.292608	0.478912	0.282758	0.355577	0.37932	0.357788	0.359057	0.453542	0.392037	0.420552
	143472	0.4	0.6	3	0.542819	0.162938	0.297399	0.234788	0.429909	0.303709	0.485928	0.290539	0.36365	0.393027	0.371965	0.372322	0.470325	0.384124	0.422876
	143472	0.4	0.6	4	0.491034	0.168482	0.287629	0.236253	0.425022	0.303695	0.467065	0.283534	0.352861	0.472617	0.486673	0.466976	0.492663	0.333226	0.397555
	143472	0.4	0.6	5	0.469164	0.171392	0.283568	0.234952	0.416217	0.300355	0.456412	0.277736	0.345331	0.476209	0.483494	0.465252	0.54563	0.298119	0.385571
	143472	0.4	0.6	6	0.457852	0.17339	0.281757	0.233269	0.406401	0.296405	0.447096	0.271792	0.338069	0.469353	0.488397	0.464422	0.496518	0.304372	0.377395
	143472	0.4	0.6	7	0.450142	0.174174	0.280006	0.234585	0.404315	0.296905	0.43806	0.270253	0.334279	0.465771	0.48685	0.460123	0.496906	0.284349	0.361712
	143472	0.4	0.6	8	0.443942	0.175313	0.278978	0.234988	0.401596	0.296489	0.433157	0.270628	0.333126	0.467427	0.481724	0.455273	0.526944	0.249179	0.338357
	143472	0.4	0.6	9	0.435395	0.175358	0.276315	0.235078	0.399561	0.296004	0.425548	0.269005	0.329635	0.456979	0.486929	0.449917	0.484555	0.285643	0.359413
	143472	0.4	0.7	1.2	0.569717	0.151279	0.293575	0.226073	0.411575	0.291841	0.462028	0.282856	0.350893	0.377377	0.361401	0.358931	0.442715	0.436495	0.439583
	143472	0.4	0.7	10	0.450561	0.169326	0.27621	0.242749	0.397587	0.301448	0.4203	0.277049	0.333961	0.455847	0.482095	0.44718	0.487615	0.256755	0.336385
	143472	0.4	0.7	11	0.446958	0.171286	0.276691	0.242055	0.39438	0.299989	0.418277	0.275919	0.332502	0.455521	0.480164	0.443246	0.511847	0.263839	0.348195
	143472	0.4	0.7	13	0.443439	0.171198	0.275528	0.241699	0.392366	0.299132	0.417224	0.27631	0.332451	0.45405	0.475246	0.437774	0.502435	0.214878	0.301018
	143472	0.4	0.7	15	0.436484	0.171929	0.273942	0.240922	0.389865	0.297809	0.418175	0.275365	0.332067	0.461491	0.478592	0.444097	0.523316	0.220227	0.309997
	143472	0.4	0.7	2	0.561673	0.154275	0.294368	0.229767	0.424963	0.298268	0.474929	0.288085	0.35863	0.377539	0.358999	0.357111	0.444554	0.394306	0.417925
	143472	0.4	0.7	3	0.544914	0.157078	0.292565	0.239292	0.431242	0.307792	0.478891	0.296118	0.365953	0.391793	0.371966	0.371124	0.441029	0.375684	0.405742
	143472	0.4	0.7	4	0.50729	0.161277	0.286032	0.242681	0.424879	0.308916	0.461166	0.291898	0.357509	0.464883	0.487034	0.46479	0.424422	0.353612	0.385795
	143472	0.4	0.7	5	0.488604	0.164056	0.283123	0.242283	0.414409	0.305788	0.449518	0.285998	0.349581	0.46432	0.483424	0.461454	0.434446	0.293527	0.350347
	143472	0.4	0.7	6	0.480644	0.165675	0.282189	0.241286	0.406132	0.302723	0.441423	0.281202	0.34355	0.469709	0.489675	0.464773	0.503255	0.337583	0.404098
	143472	0.4	0.7	7	0.471426	0.166438	0.280113	0.241666	0.403444	0.30227	0.43369	0.278013	0.338825	0.464851	0.480864	0.454334	0.49705	0.247551	0.330499
	143472	0.4	0.7	8	0.463968	0.168045	0.279226	0.242883	0.401	0.302527	0.430315	0.279672	0.339012	0.468178	0.486783	0.459827	0.49597	0.293197	0.368533
	143472	0.4	0.7	9	0.456511	0.168158	0.277067	0.243327	0.397353	0.301826	0.423018	0.278816	0.336103	0.459263	0.48232	0.451296	0.489971	0.252424	0.333193
	143472	0.4	0.8	1.2	0.568963	0.144676	0.286906	0.229362	0.411809	0.294628	0.458452	0.28764	0.353493	0.376607	0.359666	0.358888	0.41434	0.427676	0.420902
	143472	0.4	0.8	10	0.466817	0.159474	0.272847	0.24691	0.395421	0.303997	0.418214	0.285568	0.339391	0.450983	0.48078	0.445576	0.460799	0.249535	0.32375
	143472	0.4	0.8	11	0.459276	0.160948	0.271881	0.246574	0.391651	0.302624	0.414789	0.28397	0.337134	0.462434	0.476417	0.440471	0.546039	0.23769	0.331206
	143472	0.4	0.8	13	0.454584	0.16142	0.270886	0.245472	0.388893	0.300969	0.412831	0.282023	0.335114	0.452172	0.480553	0.443014	0.506913	0.263786	0.347001
	143472	0.4	0.8	15	0.449723	0.162477	0.270314	0.245969	0.387673	0.300976	0.414442	0.282748	0.336157	0.454752	0.479067	0.444521	0.492659	0.236198	0.319308
	143472	0.4	0.8	2	0.562008	0.146557	0.286995	0.23183	0.424128	0.299792	0.469637	0.290878	0.359249	0.377157	0.359816	0.358465	0.434055	0.415458	0.424553
	143472	0.4	0.8	3	0.547176	0.148857	0.285397	0.240732	0.430993	0.308917	0.47266	0.299039	0.366318	0.394342	0.371942	0.372978	0.469406	0.385535	0.423357
	143472	0.4	0.8	4	0.519524	0.151106	0.280184	0.243742	0.421882	0.308974	0.455148	0.294603	0.357686	0.469346	0.488516	0.465581	0.473935	0.366696	0.413475
	143472	0.4	0.8	5	0.501676	0.1537	0.277682	0.245279	0.412529	0.307642	0.444793	0.292141	0.352656	0.463807	0.485299	0.463208	0.419138	0.334169	0.371862
	143472	0.4	0.8	6	0.493129	0.155313	0.276748	0.244343	0.403244	0.304299	0.436989	0.287713	0.346977	0.46568	0.493931	0.465023	0.458757	0.355267	0.400434
	143472	0.4	0.8	7	0.48433	0.156674	0.275467	0.245675	0.40275	0.305187	0.431268	0.285137	0.343299	0.461607	0.487348	0.457057	0.460408	0.316185	0.374904
	143472	0.4	0.8	8	0.477795	0.157856	0.274632	0.24741	0.400405	0.305841	0.428537	0.287291	0.343979	0.462172	0.483776	0.455494	0.475057	0.266385	0.341357
	143472	0.4	0.8	9	0.470504	0.158347	0.272952	0.247188	0.395309	0.304175	0.420402	0.286574	0.340821	0.458874	0.480088	0.44824	0.500708	0.248962	0.332566
	155428	0.2	0.6	1.2	0.606419	0.141268	0.29269	0.211938	0.370119	0.269535	0.402489	0.258788	0.315025	0.322827	0.306961	0.305891	0.377621	0.402777	0.389794
	155428	0.2	0.6	10	0.440422	0.170924	0.27437	0.249262	0.373918	0.299122	0.386144	0.272011	0.319181	0.448559	0.474031	0.436949	0.442047	0.219536	0.293373
	155428	0.2	0.6	11	0.438411	0.170572	0.27346	0.248816	0.37059	0.297733	0.382712	0.271215	0.317458	0.450359	0.476937	0.442969	0.427967	0.22604	0.29583
	155428	0.2	0.6	13	0.438663	0.169127	0.272378	0.250021	0.369065	0.298098	0.380476	0.270642	0.316295	0.459017	0.482561	0.453418	0.445484	0.23957	0.31158
	155428	0.2	0.6	15	0.439333	0.168644	0.272196	0.250534	0.365632	0.297333	0.378828	0.271513	0.316316	0.462296	0.480343	0.453675	0.425957	0.217996	0.288397
	155428	0.2	0.6	2	0.583208	0.152634	0.298358	0.232972	0.420945	0.299941	0.459148	0.282154	0.349521	0.328831	0.312623	0.312696	0.420227	0.39785	0.408733
	155428	0.2	0.6	3	0.538797	0.161755	0.295217	0.240989	0.427347	0.308186	0.463441	0.286345	0.353979	0.448607	0.421664	0.42332	0.482108	0.3624	0.41377
	155428	0.2	0.6	4	0.507793	0.16752	0.29166	0.246329	0.416282	0.30951	0.450841	0.28465	0.348969	0.4677	0.495536	0.467551	0.478554	0.403261	0.437693
	155428	0.2	0.6	5	0.479303	0.170024	0.28547	0.248455	0.401751	0.307032	0.438428	0.281748	0.343044	0.466534	0.491809	0.466207	0.44974	0.332432	0.382289
	155428	0.2	0.6	6	0.464471	0.169679	0.280733	0.245872	0.387202	0.300761	0.416212	0.275588	0.331607	0.461199	0.485591	0.458007	0.418692	0.282569	0.337419
	155428	0.2	0.6	7	0.451232	0.171088	0.27785	0.246053	0.385025	0.300237	0.404198	0.272137	0.325274	0.462174	0.486492	0.457238	0.457003	0.272168	0.341159
	155428	0.2	0.6	8	0.446372	0.17272	0.277664	0.246612	0.380436	0.299243	0.3974	0.270698	0.322035	0.461818	0.482441	0.454008	0.460573	0.255918	0.329017
	155428	0.2	0.6	9	0.440506	0.172138	0.275368	0.248936	0.376297	0.299644	0.389072	0.271506	0.319827	0.452894	0.481218	0.445834	0.455834	0.242447	0.316536
	155428	0.2	0.7	1.2	0.605664	0.142567	0.293849	0.21908	0.372494	0.275894	0.405542	0.266233	0.321443	0.321352	0.311251	0.30696	0.342623	0.440679	0.385513
	155428	0.2	0.7	10	0.441512	0.173486	0.27676	0.248862	0.370192	0.297637	0.384897	0.27272	0.319241	0.448839	0.479162	0.442671	0.444683	0.246851	0.317469
	155428	0.2	0.7	11	0.440087	0.173142	0.276039	0.249343	0.368752	0.297513	0.382964	0.272774	0.318611	0.454977	0.479684	0.447221	0.45152	0.239927	0.313349
	155428	0.2	0.7	13	0.440255	0.172437	0.275529	0.250612	0.36686	0.297793	0.380279	0.27243	0.317444	0.455852	0.481346	0.450738	0.415998	0.232007	0.297882
	155428	0.2	0.7	15	0.44126	0.17134	0.274965	0.253131	0.364415	0.298746	0.378725	0.274545	0.318328	0.466627	0.484385	0.459008	0.467408	0.256856	0.331527
	155428	0.2	0.7	2	0.585219	0.151537	0.297795	0.237307	0.417294	0.302556	0.455929	0.286533	0.351907	0.328902	0.312772	0.31264	0.422559	0.40798	0.415141
	155428	0.2	0.7	3	0.541981	0.161359	0.295726	0.243807	0.423498	0.309459	0.460506	0.289555	0.355549	0.445001	0.422505	0.422212	0.413743	0.362748	0.386571
	155428	0.2	0.7	4	0.50905	0.168279	0.292681	0.249055	0.412844	0.310684	0.447631	0.287764	0.350321	0.466667	0.488891	0.465022	0.441755	0.326097	0.375216
	155428	0.2	0.7	5	0.480727	0.170988	0.286703	0.251391	0.397157	0.307893	0.434811	0.284621	0.344039	0.470411	0.488919	0.466308	0.488963	0.313191	0.381819
	155428	0.2	0.7	6	0.465393	0.170998	0.282102	0.247946	0.384911	0.301608	0.413654	0.277572	0.332218	0.46279	0.48687	0.457063	0.43915	0.286352	0.346661
	155428	0.2	0.7	7	0.453578	0.172772	0.279938	0.248786	0.382077	0.30135	0.402201	0.275468	0.326984	0.456197	0.489997	0.454777	0.426464	0.31026	0.359198
	155428	0.2	0.7	8	0.448718	0.174351	0.279704	0.249046	0.377223	0.300018	0.395501	0.274138	0.323822	0.461944	0.481644	0.452443	0.454379	0.248027	0.320892
	155428	0.2	0.7	9	0.441679	0.174402	0.277542	0.249017	0.372976	0.298644	0.388584	0.273092	0.320759	0.448454	0.477253	0.441555	0.406814	0.223172	0.288227
	155428	0.2	0.8	1.2	0.605581	0.137719	0.288791	0.223166	0.374293	0.279616	0.40323	0.270603	0.323865	0.319756	0.307091	0.304535	0.322618	0.38705	0.351909
	155428	0.2	0.8	10	0.445282	0.16922	0.274501	0.253064	0.371445	0.301034	0.387181	0.2771	0.323019	0.444101	0.476059	0.436604	0.381545	0.230779	0.287601
	155428	0.2	0.8	11	0.446874	0.168654	0.274531	0.254087	0.370828	0.301554	0.385778	0.277868	0.32305	0.447446	0.47798	0.44386	0.394081	0.223836	0.285506
	155428	0.2	0.8	13	0.444947	0.168637	0.273924	0.254348	0.367805	0.300731	0.381519	0.275995	0.320289	0.461938	0.480508	0.451881	0.453344	0.228219	0.303602
	155428	0.2	0.8	15	0.445366	0.167628	0.273232	0.25615	0.364398	0.300833	0.378118	0.277434	0.320044	0.466135	0.485087	0.458393	0.45759	0.24702	0.320841
	155428	0.2	0.8	2	0.585302	0.145134	0.291457	0.238191	0.417242	0.30326	0.451308	0.2875	0.351244	0.326645	0.313372	0.31117	0.368911	0.413788	0.390063
	155428	0.2	0.8	3	0.547009	0.153367	0.289643	0.246359	0.422684	0.311287	0.455281	0.293077	0.356601	0.444919	0.426794	0.422609	0.414572	0.4101	0.412324
	155428	0.2	0.8	4	0.51215	0.161734	0.287806	0.251789	0.411412	0.312391	0.44288	0.290123	0.350584	0.467749	0.487402	0.464575	0.444674	0.317162	0.370247
	155428	0.2	0.8	5	0.485671	0.165719	0.283698	0.255612	0.398412	0.311423	0.434207	0.289587	0.347449	0.468488	0.48683	0.463586	0.459705	0.29417	0.358764
	155428	0.2	0.8	6	0.469666	0.167093	0.280139	0.25248	0.385364	0.30508	0.413912	0.283057	0.3362	0.464112	0.486012	0.459862	0.450167	0.27512	0.34152
	155428	0.2	0.8	7	0.460449	0.16866	0.278674	0.253447	0.382721	0.304949	0.403501	0.281211	0.331435	0.462739	0.48517	0.456743	0.46509	0.270239	0.341848
	155428	0.2	0.8	8	0.454416	0.169929	0.277882	0.253092	0.379046	0.303521	0.39726	0.278511	0.327452	0.459684	0.484442	0.454592	0.444191	0.257665	0.326142
	155428	0.2	0.8	9	0.447293	0.170088	0.275824	0.253138	0.375021	0.302255	0.391529	0.277701	0.324935	0.452616	0.47594	0.440767	0.451222	0.215699	0.291873
	155428	0.25	0.6	1.2	0.597872	0.143433	0.292839	0.217866	0.373493	0.275202	0.419576	0.267787	0.326922	0.357661	0.343322	0.341096	0.348861	0.414061	0.378675
	155428	0.25	0.6	10	0.430367	0.174076	0.273709	0.245759	0.384462	0.299848	0.398567	0.270315	0.322146	0.451173	0.476756	0.438587	0.472938	0.233441	0.312589
	155428	0.25	0.6	11	0.428775	0.17402	0.273158	0.245691	0.384084	0.299681	0.396481	0.270343	0.321482	0.453724	0.477485	0.438996	0.495857	0.242564	0.325768
	155428	0.25	0.6	13	0.427602	0.173673	0.272512	0.246897	0.381074	0.299651	0.394288	0.270404	0.320801	0.455151	0.477881	0.444917	0.460543	0.224124	0.301516
	155428	0.25	0.6	15	0.425339	0.173097	0.27134	0.247204	0.376157	0.298342	0.390717	0.269868	0.319238	0.458971	0.480016	0.449824	0.468115	0.226762	0.305524
	155428	0.25	0.6	2	0.579521	0.154231	0.298965	0.231504	0.416209	0.297521	0.465084	0.285437	0.35376	0.360577	0.34648	0.343079	0.407405	0.444582	0.425183
	155428	0.25	0.6	3	0.54173	0.161617	0.295893	0.240925	0.431497	0.309206	0.478325	0.290274	0.361295	0.374283	0.35493	0.355418	0.459642	0.38946	0.421651
	155428	0.25	0.6	4	0.499078	0.169442	0.290801	0.241391	0.424588	0.307793	0.46829	0.28273	0.352586	0.466107	0.492448	0.466165	0.44286	0.35654	0.39504
	155428	0.25	0.6	5	0.479051	0.171635	0.286744	0.241697	0.415291	0.30556	0.454366	0.278519	0.345347	0.471363	0.48936	0.464846	0.509527	0.326068	0.397658
	155428	0.25	0.6	6	0.465561	0.172057	0.283025	0.24322	0.405902	0.304176	0.437547	0.276065	0.338535	0.463778	0.484736	0.458833	0.452241	0.277521	0.343965
	155428	0.25	0.6	7	0.455086	0.172744	0.280381	0.240897	0.395885	0.299529	0.419806	0.270782	0.329215	0.463225	0.484281	0.454112	0.502716	0.276074	0.356417
	155428	0.25	0.6	8	0.44478	0.173471	0.27777	0.241623	0.389815	0.29833	0.411963	0.270553	0.326609	0.458544	0.481301	0.451366	0.440892	0.239981	0.310794
	155428	0.25	0.6	9	0.438663	0.173413	0.275808	0.247391	0.387734	0.302057	0.404225	0.27301	0.325906	0.455653	0.478274	0.443394	0.487793	0.239863	0.32159
	155428	0.25	0.7	1.2	0.597117	0.143693	0.292919	0.226003	0.377597	0.282764	0.422019	0.2756	0.333444	0.358407	0.344008	0.341542	0.351301	0.410984	0.378806
	155428	0.25	0.7	10	0.4333	0.175344	0.275638	0.246483	0.384423	0.300374	0.40072	0.271987	0.324036	0.445612	0.475826	0.436772	0.424366	0.221473	0.29105
	155428	0.25	0.7	11	0.431289	0.175366	0.275016	0.246331	0.383911	0.300104	0.398391	0.272059	0.323323	0.444285	0.478765	0.436954	0.444353	0.259163	0.327384
	155428	0.25	0.7	13	0.430032	0.174715	0.274104	0.248133	0.380485	0.300376	0.395417	0.272998	0.322997	0.461952	0.480383	0.446544	0.485667	0.220067	0.302889
	155428	0.25	0.7	15	0.429194	0.173001	0.27249	0.25023	0.37658	0.30067	0.391912	0.273894	0.322444	0.45929	0.480028	0.449649	0.458181	0.222827	0.299836
	155428	0.25	0.7	2	0.579772	0.153586	0.298404	0.235648	0.415101	0.300631	0.463874	0.28899	0.35612	0.359573	0.344632	0.342885	0.387099	0.410353	0.398387
	155428	0.25	0.7	3	0.544746	0.16115	0.296287	0.243462	0.429519	0.310771	0.477195	0.293033	0.363097	0.373792	0.353233	0.352291	0.44166	0.372702	0.404261
	155428	0.25	0.7	4	0.502262	0.168496	0.290911	0.24438	0.423598	0.309947	0.466261	0.28612	0.354625	0.469542	0.485352	0.46258	0.490316	0.314594	0.383274
	155428	0.25	0.7	5	0.482822	0.171138	0.287453	0.245461	0.413382	0.308022	0.451931	0.282234	0.34747	0.469189	0.489096	0.465415	0.480831	0.311814	0.378303
	155428	0.25	0.7	6	0.468745	0.171469	0.283505	0.247016	0.406357	0.307257	0.437028	0.279402	0.340875	0.463309	0.486197	0.459363	0.440797	0.276449	0.339794
	155428	0.25	0.7	7	0.459192	0.171531	0.280652	0.244455	0.395818	0.302245	0.419832	0.274415	0.331894	0.457789	0.485891	0.454842	0.433512	0.274158	0.335893
	155428	0.25	0.7	8	0.44788	0.172877	0.27826	0.246774	0.391535	0.302739	0.414135	0.274982	0.330509	0.457016	0.481348	0.450176	0.423674	0.239854	0.306301
	155428	0.25	0.7	9	0.440171	0.174637	0.277255	0.24651	0.387547	0.301342	0.406306	0.27321	0.326723	0.456496	0.480494	0.445202	0.504367	0.237434	0.322874
	155428	0.25	0.8	1.2	0.595525	0.14086	0.28963	0.229343	0.37824	0.285547	0.418577	0.278519	0.334478	0.35627	0.34442	0.340289	0.322187	0.408413	0.360212
	155428	0.25	0.8	10	0.437825	0.174654	0.276528	0.249573	0.383226	0.302285	0.398489	0.275259	0.325604	0.444769	0.480835	0.434915	0.429413	0.250174	0.316156
	155428	0.25	0.8	11	0.434641	0.174365	0.275292	0.249391	0.381653	0.301662	0.395942	0.275174	0.324691	0.444138	0.47487	0.434802	0.449177	0.213058	0.289024
	155428	0.25	0.8	13	0.43221	0.174015	0.274246	0.250773	0.375874	0.300836	0.390439	0.27571	0.323195	0.45377	0.485336	0.449216	0.447597	0.263409	0.331646
	155428	0.25	0.8	15	0.430786	0.172374	0.2725	0.253133	0.371701	0.301167	0.386258	0.276431	0.322244	0.461216	0.480397	0.450243	0.467231	0.225114	0.303838
	155428	0.25	0.8	2	0.578515	0.150181	0.294758	0.23754	0.414038	0.301885	0.455783	0.290633	0.354938	0.358741	0.3493	0.343079	0.379411	0.48561	0.425991
	155428	0.25	0.8	3	0.549355	0.156701	0.293401	0.245549	0.427437	0.311914	0.467973	0.296481	0.362991	0.373138	0.351564	0.35308	0.429417	0.341767	0.380611
	155428	0.25	0.8	4	0.505698	0.166215	0.289921	0.244867	0.420971	0.309631	0.458736	0.287843	0.353731	0.466861	0.490246	0.465128	0.463932	0.347973	0.397672
	155428	0.25	0.8	5	0.485755	0.16852	0.286111	0.247036	0.413289	0.309234	0.447117	0.284502	0.347738	0.468947	0.490738	0.46546	0.472782	0.333144	0.390866
	155428	0.25	0.8	6	0.473186	0.169616	0.283302	0.247997	0.402512	0.306903	0.431678	0.281008	0.340416	0.463034	0.491684	0.462145	0.44686	0.327115	0.377724
	155428	0.25	0.8	7	0.46422	0.170212	0.281097	0.246189	0.394232	0.303099	0.416545	0.276542	0.332403	0.458261	0.484424	0.453404	0.449893	0.267992	0.335897
	155428	0.25	0.8	8	0.45207	0.172315	0.279103	0.250252	0.390318	0.304972	0.410537	0.278379	0.331782	0.463157	0.486199	0.456051	0.475462	0.265219	0.340502
	155428	0.25	0.8	9	0.444361	0.173315	0.277515	0.249518	0.387223	0.30348	0.404498	0.276366	0.328375	0.455325	0.479578	0.44458	0.496422	0.253501	0.335617
	155428	0.3	0.6	1.2	0.592341	0.148185	0.296271	0.225717	0.388059	0.285419	0.431332	0.276082	0.336671	0.353593	0.336756	0.33639	0.378905	0.382898	0.380891
	155428	0.3	0.6	10	0.43087	0.171746	0.27203	0.24202	0.386904	0.297774	0.408322	0.270184	0.325191	0.447844	0.475822	0.437885	0.448538	0.219177	0.294464
	155428	0.3	0.6	11	0.429026	0.171676	0.271392	0.24284	0.385441	0.297958	0.408672	0.270814	0.325758	0.450059	0.474441	0.436532	0.466228	0.205113	0.284891
	155428	0.3	0.6	13	0.429613	0.171821	0.271692	0.245327	0.382457	0.298915	0.406047	0.271603	0.325488	0.460829	0.479441	0.448026	0.494456	0.249785	0.331902
	155428	0.3	0.6	15	0.42911	0.17094	0.270836	0.247963	0.380451	0.300241	0.405038	0.272262	0.325635	0.462107	0.479251	0.451275	0.477735	0.217406	0.298824
	155428	0.3	0.6	2	0.57575	0.155287	0.299009	0.23258	0.416397	0.298456	0.464032	0.28584	0.353764	0.355244	0.33972	0.338191	0.404804	0.424307	0.414326
	155428	0.3	0.6	3	0.546422	0.161755	0.297299	0.235603	0.426475	0.303526	0.47766	0.287153	0.35868	0.395827	0.373513	0.374782	0.465414	0.367882	0.41094
	155428	0.3	0.6	4	0.505614	0.167353	0.290888	0.24056	0.423496	0.30683	0.464501	0.28262	0.351422	0.469936	0.487387	0.465082	0.481939	0.315826	0.381588
	155428	0.3	0.6	5	0.48056	0.169898	0.285738	0.242698	0.417365	0.306921	0.453691	0.280019	0.3463	0.468835	0.488479	0.46515	0.480802	0.305467	0.373585
	155428	0.3	0.6	6	0.461371	0.170045	0.280096	0.239453	0.4071	0.301542	0.434973	0.27267	0.335209	0.464448	0.487498	0.461001	0.45706	0.284515	0.350714
	155428	0.3	0.6	7	0.448802	0.169813	0.276066	0.237163	0.395031	0.296386	0.418125	0.26728	0.326103	0.459185	0.481544	0.451498	0.432942	0.253353	0.31965
	155428	0.3	0.6	8	0.444863	0.170744	0.275604	0.239636	0.392237	0.297509	0.416989	0.269154	0.327145	0.466798	0.485471	0.456945	0.521787	0.272726	0.358219
	155428	0.3	0.6	9	0.438914	0.171275	0.274181	0.242993	0.388523	0.29899	0.410549	0.271088	0.326552	0.462587	0.478589	0.444296	0.512234	0.243493	0.33008
	155428	0.3	0.7	1.2	0.591587	0.144794	0.292674	0.231418	0.3897	0.290391	0.432462	0.282304	0.34161	0.353625	0.341288	0.336666	0.378659	0.446581	0.409825
	155428	0.3	0.7	10	0.447461	0.168889	0.274903	0.247937	0.389056	0.302865	0.410572	0.276679	0.330582	0.452878	0.477621	0.43969	0.489285	0.255855	0.336006
	155428	0.3	0.7	11	0.446204	0.169285	0.274838	0.248685	0.387346	0.3029	0.410652	0.277693	0.331331	0.448512	0.474022	0.437522	0.458759	0.230732	0.307039
	155428	0.3	0.7	13	0.445869	0.168926	0.274443	0.25133	0.385227	0.304196	0.409084	0.278766	0.33158	0.461854	0.480567	0.448909	0.510916	0.228203	0.315491
	155428	0.3	0.7	15	0.440758	0.168075	0.272177	0.253082	0.380219	0.303889	0.405855	0.278934	0.330633	0.463613	0.479733	0.451458	0.489011	0.217114	0.300715
	155428	0.3	0.7	2	0.575834	0.150401	0.294289	0.23589	0.415671	0.300978	0.461135	0.289732	0.35587	0.356792	0.341615	0.339837	0.412841	0.435491	0.423863
	155428	0.3	0.7	3	0.55279	0.156623	0.294244	0.240096	0.426265	0.307175	0.473769	0.292211	0.361473	0.392524	0.372802	0.372453	0.433995	0.378791	0.404518
	155428	0.3	0.7	4	0.512234	0.163795	0.289657	0.247327	0.426458	0.313081	0.465419	0.290975	0.358081	0.469497	0.487966	0.465161	0.482458	0.332537	0.393709
	155428	0.3	0.7	5	0.494386	0.165949	0.286431	0.247781	0.41743	0.310973	0.45314	0.287232	0.351597	0.464549	0.486726	0.461363	0.433016	0.293354	0.349758
	155428	0.3	0.7	6	0.476202	0.166575	0.281644	0.245291	0.407648	0.306284	0.435851	0.27976	0.340783	0.465804	0.487289	0.459125	0.471932	0.281135	0.352363
	155428	0.3	0.7	7	0.462293	0.1672	0.27802	0.243122	0.396919	0.301542	0.420376	0.274703	0.332275	0.46026	0.485526	0.455492	0.452213	0.287938	0.351845
	155428	0.3	0.7	8	0.457349	0.167892	0.277102	0.243792	0.394319	0.301302	0.419756	0.274467	0.331908	0.46605	0.487118	0.458155	0.500846	0.295027	0.371323
	155428	0.3	0.7	9	0.451986	0.16853	0.275995	0.247714	0.391359	0.303393	0.413496	0.276888	0.331677	0.459539	0.484513	0.448995	0.519677	0.290783	0.372907
	155428	0.3	0.8	1.2	0.590079	0.14416	0.29166	0.234393	0.388262	0.292316	0.427807	0.285534	0.342483	0.35213	0.341858	0.335652	0.346245	0.455133	0.393291
	155428	0.3	0.8	10	0.452991	0.167132	0.275153	0.252966	0.383743	0.304924	0.406497	0.281437	0.332599	0.446358	0.47782	0.439612	0.439546	0.246454	0.315824
	155428	0.3	0.8	11	0.450478	0.167519	0.274706	0.25372	0.382475	0.305068	0.405925	0.282355	0.333048	0.453902	0.479927	0.441793	0.467822	0.26717	0.340107
	155428	0.3	0.8	13	0.450478	0.167427	0.274631	0.256326	0.379292	0.305915	0.403397	0.283817	0.333203	0.454726	0.481707	0.447482	0.481807	0.243725	0.323703
	155428	0.3	0.8	15	0.447126	0.166493	0.272843	0.258305	0.375115	0.305939	0.399253	0.28437	0.332158	0.462107	0.482996	0.453703	0.468892	0.245663	0.322409
	155428	0.3	0.8	2	0.57508	0.148376	0.29211	0.237882	0.411004	0.301349	0.452567	0.291864	0.35487	0.357011	0.338763	0.338209	0.447788	0.406342	0.426059
	155428	0.3	0.8	3	0.557399	0.154775	0.29372	0.242727	0.419973	0.307647	0.4639	0.295791	0.361245	0.39375	0.372173	0.373096	0.426322	0.351756	0.385466
	155428	0.3	0.8	4	0.517178	0.161994	0.289447	0.249722	0.42055	0.313367	0.455651	0.2936	0.357101	0.467815	0.487683	0.464995	0.45243	0.32408	0.377647
	155428	0.3	0.8	5	0.501173	0.163773	0.286494	0.250978	0.413186	0.312274	0.44617	0.290168	0.351643	0.468373	0.487723	0.463644	0.468339	0.306635	0.370617
	155428	0.3	0.8	6	0.483241	0.164008	0.281523	0.250354	0.40246	0.308686	0.430942	0.284108	0.342449	0.464399	0.486853	0.46012	0.452315	0.296982	0.358548
	155428	0.3	0.8	7	0.471175	0.165081	0.278894	0.248685	0.391493	0.30416	0.416607	0.280152	0.335018	0.458632	0.483888	0.454327	0.440985	0.26159	0.328384
	155428	0.3	0.8	8	0.466063	0.165671	0.277873	0.249365	0.387898	0.303574	0.413847	0.27977	0.33385	0.459068	0.484268	0.454722	0.455637	0.267701	0.337254
	155428	0.3	0.8	9	0.458773	0.166276	0.276194	0.252511	0.386137	0.305344	0.409477	0.281542	0.333667	0.449282	0.478093	0.443297	0.438392	0.236255	0.307042
	155428	0.35	0.6	1.2	0.580023	0.151639	0.296571	0.227134	0.399976	0.289736	0.450339	0.278096	0.343853	0.355732	0.339925	0.338748	0.384456	0.396391	0.390332
	155428	0.35	0.6	10	0.438244	0.176193	0.277877	0.241349	0.391316	0.298559	0.422147	0.272695	0.331348	0.460572	0.476912	0.446014	0.513956	0.230903	0.318648
	155428	0.35	0.6	11	0.437238	0.176328	0.277664	0.24175	0.390456	0.298614	0.419628	0.273381	0.331073	0.466087	0.480324	0.450131	0.572399	0.255997	0.353774
	155428	0.35	0.6	13	0.431875	0.177053	0.276523	0.242906	0.386378	0.298287	0.413838	0.273372	0.32925	0.455418	0.480292	0.445775	0.507193	0.245534	0.330886
	155428	0.35	0.6	15	0.429445	0.175863	0.274816	0.243074	0.382553	0.297265	0.409668	0.270946	0.32617	0.456091	0.478685	0.446108	0.476605	0.224473	0.305201
	155428	0.35	0.6	2	0.567454	0.15756	0.299012	0.231395	0.419498	0.298266	0.47215	0.286532	0.356634	0.35784	0.342235	0.340652	0.435758	0.421287	0.428401
	155428	0.35	0.6	3	0.545584	0.163123	0.298324	0.237793	0.427638	0.305635	0.479778	0.289784	0.361328	0.403219	0.381209	0.382307	0.468184	0.39669	0.429482
	155428	0.35	0.6	4	0.499665	0.168021	0.289749	0.243405	0.424504	0.309402	0.467262	0.288305	0.356591	0.468686	0.491028	0.464925	0.474246	0.341115	0.396812
	155428	0.35	0.6	5	0.478381	0.170664	0.285731	0.244413	0.414351	0.307463	0.456191	0.283215	0.34947	0.471572	0.488633	0.466741	0.495508	0.322285	0.390551
	155428	0.35	0.6	6	0.459025	0.171741	0.280773	0.239671	0.404037	0.300869	0.443798	0.274809	0.339434	0.469769	0.48759	0.462088	0.506448	0.294506	0.372436
	155428	0.35	0.6	7	0.452991	0.172609	0.279625	0.239452	0.40185	0.300089	0.438144	0.273602	0.336854	0.465371	0.486719	0.456269	0.496271	0.290479	0.36646
	155428	0.35	0.6	8	0.447629	0.174294	0.279319	0.239969	0.398827	0.299646	0.436627	0.273254	0.336141	0.465303	0.483934	0.454599	0.516815	0.269144	0.353957
	155428	0.35	0.6	9	0.440506	0.175207	0.277813	0.239514	0.393966	0.297911	0.428675	0.27202	0.332836	0.457528	0.482813	0.451396	0.459818	0.259733	0.331957
	155428	0.35	0.7	1.2	0.578767	0.149338	0.293993	0.230271	0.401259	0.292617	0.448119	0.281207	0.345563	0.356911	0.33772	0.337738	0.398825	0.368675	0.383158
	155428	0.35	0.7	10	0.444277	0.171763	0.276243	0.24626	0.390629	0.302082	0.420001	0.278849	0.33517	0.456396	0.480813	0.449187	0.457273	0.252213	0.325109
	155428	0.35	0.7	11	0.443355	0.172074	0.276206	0.246941	0.39057	0.302576	0.418085	0.279762	0.335215	0.460955	0.476609	0.44571	0.499193	0.239645	0.32383
	155428	0.35	0.7	13	0.437406	0.173166	0.275216	0.24751	0.387888	0.302192	0.414236	0.279496	0.333781	0.454713	0.47759	0.442007	0.490996	0.229536	0.312827
	155428	0.35	0.7	15	0.434138	0.172224	0.273439	0.246618	0.384297	0.300435	0.410016	0.276049	0.329953	0.4572	0.477854	0.445958	0.48978	0.226137	0.309414
	155428	0.35	0.7	2	0.567873	0.153634	0.295372	0.234239	0.420076	0.300767	0.468231	0.289383	0.357697	0.357868	0.341165	0.340635	0.410303	0.406824	0.408556
	155428	0.35	0.7	3	0.548517	0.159202	0.295508	0.241247	0.428495	0.308695	0.475854	0.294895	0.364132	0.401237	0.384161	0.381673	0.450903	0.43347	0.442015
	155428	0.35	0.7	4	0.509888	0.162636	0.287969	0.246432	0.424	0.311701	0.460398	0.293347	0.358361	0.474359	0.488896	0.466474	0.513737	0.334722	0.405344
	155428	0.35	0.7	5	0.487263	0.165137	0.283663	0.245827	0.41352	0.308348	0.451097	0.286812	0.350667	0.465345	0.488154	0.463364	0.444965	0.320121	0.372357
	155428	0.35	0.7	6	0.46841	0.166568	0.279324	0.243467	0.403829	0.303784	0.440606	0.280291	0.342623	0.465324	0.485321	0.459375	0.482845	0.287286	0.360237
	155428	0.35	0.7	7	0.461036	0.168484	0.278706	0.243482	0.401122	0.303026	0.435618	0.278687	0.339914	0.463576	0.484832	0.454023	0.496492	0.296312	0.37113
	155428	0.35	0.7	8	0.455421	0.169973	0.278225	0.244349	0.397666	0.302701	0.43402	0.279154	0.339772	0.467432	0.485094	0.456579	0.53248	0.288838	0.374521
	155428	0.35	0.7	9	0.448467	0.17078	0.276747	0.245286	0.394137	0.302386	0.42833	0.279568	0.338318	0.459778	0.489477	0.45548	0.480369	0.304503	0.372733
	155428	0.35	0.8	1.2	0.576504	0.145974	0.290094	0.232605	0.40095	0.294412	0.446668	0.284377	0.347509	0.356629	0.341297	0.339202	0.407556	0.407334	0.407445
	155428	0.35	0.8	10	0.456846	0.167544	0.276662	0.249448	0.390297	0.304368	0.420201	0.283189	0.338351	0.46432	0.479526	0.44764	0.519278	0.242524	0.33063
	155428	0.35	0.8	11	0.456762	0.167143	0.276306	0.250675	0.390818	0.305438	0.419062	0.284364	0.338817	0.45674	0.478459	0.446957	0.476499	0.258501	0.335172
	155428	0.35	0.8	13	0.452405	0.167395	0.275191	0.251975	0.387634	0.305418	0.414463	0.285135	0.337845	0.452175	0.481642	0.444783	0.481446	0.252674	0.331415
	155428	0.35	0.8	15	0.448886	0.167232	0.273985	0.250957	0.383282	0.303316	0.40936	0.281231	0.333409	0.455465	0.481671	0.447995	0.477632	0.25025	0.328425
	155428	0.35	0.8	2	0.565611	0.149262	0.290558	0.23585	0.418565	0.3017	0.464965	0.291588	0.35841	0.357553	0.338356	0.339115	0.411419	0.366646	0.387745
	155428	0.35	0.8	3	0.551114	0.154139	0.291459	0.243792	0.428118	0.310672	0.473456	0.298801	0.366378	0.403119	0.377034	0.378234	0.474871	0.340694	0.396745
	155428	0.35	0.8	4	0.513156	0.157397	0.284199	0.249644	0.421485	0.313565	0.457337	0.297948	0.360825	0.466432	0.489217	0.464515	0.442832	0.329889	0.378106
	155428	0.35	0.8	5	0.494386	0.15899	0.280361	0.248707	0.41411	0.310771	0.449297	0.290109	0.352567	0.470665	0.490859	0.467617	0.494193	0.347955	0.408377
	155428	0.35	0.8	6	0.478884	0.161884	0.278431	0.246922	0.405035	0.306806	0.441643	0.284323	0.345937	0.46293	0.492756	0.462102	0.454578	0.333052	0.38444
	155428	0.35	0.8	7	0.47218	0.163626	0.277958	0.247519	0.401852	0.306346	0.435834	0.283477	0.34352	0.460422	0.490268	0.456247	0.483888	0.321856	0.38658
	155428	0.35	0.8	8	0.468745	0.165198	0.278272	0.24864	0.397687	0.305978	0.434271	0.284532	0.343805	0.464038	0.482394	0.452821	0.521735	0.274954	0.360123
	155428	0.35	0.8	9	0.461538	0.166039	0.276828	0.249286	0.394858	0.305623	0.428695	0.284245	0.341836	0.458005	0.484333	0.452111	0.481	0.271097	0.346757
	155428	0.4	0.6	1.2	0.565862	0.155843	0.296961	0.218547	0.404854	0.283861	0.45992	0.274388	0.343715	0.376202	0.359241	0.358021	0.420895	0.404857	0.41272
	155428	0.4	0.6	10	0.435562	0.174353	0.275575	0.237072	0.4023	0.298337	0.425642	0.271336	0.331408	0.452678	0.475425	0.438121	0.502097	0.235824	0.320919
	155428	0.4	0.6	11	0.431624	0.174536	0.27447	0.236783	0.39789	0.296889	0.421613	0.270496	0.329557	0.449745	0.472497	0.427416	0.538278	0.219844	0.312185
	155428	0.4	0.6	13	0.428021	0.175189	0.273833	0.238014	0.397758	0.297817	0.419338	0.270566	0.328911	0.458231	0.474427	0.435899	0.551538	0.217742	0.312222
	155428	0.4	0.6	15	0.425675	0.174905	0.27286	0.236644	0.393339	0.295504	0.415449	0.266936	0.325031	0.459187	0.47587	0.440758	0.518028	0.216839	0.305711
	155428	0.4	0.6	2	0.556477	0.158955	0.297414	0.224178	0.417092	0.291618	0.47318	0.2813	0.352841	0.375199	0.358074	0.356607	0.40427	0.379213	0.391341
	155428	0.4	0.6	3	0.538797	0.160977	0.294506	0.233112	0.427083	0.301602	0.477565	0.28658	0.358206	0.390644	0.370344	0.37066	0.459292	0.385041	0.418902
	155428	0.4	0.6	4	0.49757	0.16596	0.287362	0.238777	0.425459	0.305885	0.464257	0.284574	0.352858	0.463716	0.4897	0.463357	0.413911	0.332519	0.368778
	155428	0.4	0.6	5	0.480476	0.169121	0.285059	0.237666	0.416839	0.302728	0.456181	0.279986	0.346998	0.471914	0.488473	0.465771	0.524188	0.345789	0.416697
	155428	0.4	0.6	6	0.467572	0.170141	0.282051	0.237276	0.410004	0.300593	0.444916	0.274939	0.339859	0.469412	0.485932	0.459911	0.500034	0.285574	0.363532
	155428	0.4	0.6	7	0.460198	0.1715	0.280934	0.236587	0.407274	0.299306	0.438699	0.272042	0.335831	0.465172	0.483571	0.455408	0.514522	0.28033	0.362925
	155428	0.4	0.6	8	0.449053	0.173176	0.278864	0.237282	0.405838	0.299471	0.436991	0.273261	0.336254	0.459007	0.486537	0.4552	0.485107	0.291273	0.363993
	155428	0.4	0.6	9	0.441093	0.173872	0.276936	0.235919	0.40241	0.297452	0.430403	0.272239	0.33352	0.459009	0.478048	0.444794	0.503261	0.248434	0.332654
	155428	0.4	0.7	1.2	0.565862	0.152067	0.293341	0.223856	0.41174	0.290029	0.462439	0.280091	0.348874	0.378557	0.358475	0.358483	0.449168	0.406773	0.42692
	155428	0.4	0.7	10	0.446372	0.168237	0.274037	0.242979	0.398999	0.302031	0.423284	0.277836	0.335473	0.456837	0.478908	0.441982	0.520238	0.239552	0.328049
	155428	0.4	0.7	11	0.440422	0.168853	0.272702	0.242592	0.393766	0.300222	0.4177	0.276184	0.332511	0.442469	0.475759	0.431901	0.477798	0.244981	0.323892
	155428	0.4	0.7	13	0.436903	0.169733	0.272317	0.243727	0.392575	0.300741	0.415339	0.276032	0.331651	0.456855	0.477122	0.438789	0.529814	0.231171	0.321893
	155428	0.4	0.7	15	0.434222	0.170254	0.271897	0.242784	0.389417	0.299096	0.412267	0.272766	0.328312	0.460011	0.47751	0.442567	0.53402	0.224384	0.315994
	155428	0.4	0.7	2	0.558656	0.153947	0.293263	0.228716	0.423922	0.297125	0.474427	0.285876	0.356772	0.376125	0.361622	0.35891	0.404731	0.437658	0.420551
	155428	0.4	0.7	3	0.542567	0.155722	0.290671	0.238562	0.428483	0.306485	0.475108	0.292684	0.362225	0.387974	0.368815	0.368417	0.413625	0.370512	0.390883
	155428	0.4	0.7	4	0.505279	0.161176	0.285375	0.244014	0.42625	0.310358	0.462302	0.291615	0.357636	0.467427	0.48917	0.465428	0.460491	0.350044	0.397742
	155428	0.4	0.7	5	0.490028	0.163834	0.283343	0.243915	0.415486	0.30738	0.452753	0.28792	0.351995	0.466302	0.491086	0.464375	0.463317	0.331181	0.386261
	155428	0.4	0.7	6	0.477711	0.165189	0.280914	0.24299	0.409271	0.304936	0.443526	0.283153	0.345643	0.466235	0.486797	0.460787	0.49384	0.302076	0.374856
	155428	0.4	0.7	7	0.471426	0.16585	0.279618	0.243467	0.406372	0.3045	0.438332	0.280823	0.342329	0.460256	0.484907	0.453949	0.466513	0.286466	0.354964
	155428	0.4	0.7	8	0.460533	0.167593	0.277817	0.243679	0.404138	0.304036	0.436285	0.280892	0.341754	0.464511	0.483974	0.454325	0.527213	0.261362	0.349475
	155428	0.4	0.7	9	0.452489	0.167957	0.275678	0.243084	0.399985	0.302394	0.429522	0.280461	0.339344	0.457936	0.480402	0.446675	0.515709	0.263438	0.348733
	155428	0.4	0.8	1.2	0.563935	0.143942	0.284911	0.227376	0.409299	0.292346	0.454134	0.285097	0.350289	0.378465	0.362564	0.360464	0.427811	0.451588	0.439378
	155428	0.4	0.8	10	0.464052	0.157936	0.270722	0.248401	0.39295	0.304386	0.417637	0.286734	0.340022	0.4509	0.477902	0.438862	0.497067	0.246164	0.329265
	155428	0.4	0.8	11	0.456176	0.158938	0.269265	0.247823	0.387206	0.302218	0.411834	0.284814	0.336744	0.439613	0.473756	0.427988	0.47365	0.225044	0.305118
	155428	0.4	0.8	13	0.451818	0.159662	0.268585	0.247774	0.385369	0.301621	0.408457	0.281926	0.333597	0.456072	0.477459	0.438678	0.522151	0.242961	0.331618
	155428	0.4	0.8	15	0.446204	0.160502	0.267613	0.247124	0.382642	0.300302	0.405182	0.279804	0.331019	0.456868	0.480131	0.44552	0.518441	0.257677	0.344252
	155428	0.4	0.8	2	0.557734	0.144611	0.283998	0.23083	0.41944	0.297782	0.463406	0.288972	0.355968	0.380598	0.358286	0.359209	0.489934	0.391871	0.43545
	155428	0.4	0.8	3	0.546338	0.14603	0.282456	0.240407	0.427347	0.30771	0.467206	0.296696	0.362922	0.389272	0.370422	0.369019	0.431236	0.389123	0.409099
	155428	0.4	0.8	4	0.520194	0.14906	0.27846	0.245582	0.4202	0.309992	0.450702	0.2958	0.35718	0.466375	0.488205	0.463745	0.430712	0.33754	0.378476
	155428	0.4	0.8	5	0.503436	0.151484	0.276156	0.247368	0.414355	0.309792	0.44452	0.294269	0.354116	0.472488	0.491213	0.468359	0.508553	0.342014	0.40898
	155428	0.4	0.8	6	0.495224	0.153337	0.275565	0.246646	0.405395	0.306696	0.436478	0.29091	0.349128	0.462791	0.488508	0.460283	0.447863	0.318835	0.372492
	155428	0.4	0.8	7	0.488017	0.15463	0.274703	0.247758	0.403806	0.307095	0.432136	0.288838	0.346246	0.463619	0.485928	0.457083	0.467776	0.30208	0.367097
	155428	0.4	0.8	8	0.477459	0.156649	0.273484	0.248881	0.399849	0.306799	0.430037	0.289678	0.346171	0.4612	0.487612	0.45669	0.488593	0.299225	0.37115
	155428	0.4	0.8	9	0.470085	0.157272	0.271904	0.248555	0.39548	0.305258	0.424101	0.289672	0.344228	0.450104	0.486239	0.44646	0.447213	0.29675	0.356766
	167384	0.2	0.6	1.2	0.604827	0.14106	0.29209	0.213107	0.370703	0.270634	0.399929	0.259114	0.314478	0.320691	0.307495	0.305565	0.350209	0.41222	0.378693
	167384	0.2	0.6	10	0.447126	0.171314	0.276765	0.250805	0.377696	0.301441	0.394689	0.276812	0.325404	0.450263	0.476849	0.439733	0.444179	0.22706	0.300504
	167384	0.2	0.6	11	0.449053	0.171009	0.277114	0.250703	0.376876	0.301106	0.393507	0.277254	0.325306	0.457632	0.482126	0.450317	0.450112	0.258421	0.328336
	167384	0.2	0.6	13	0.43992	0.170856	0.274158	0.250765	0.374934	0.300529	0.387994	0.275583	0.322267	0.462957	0.480438	0.452548	0.451772	0.219158	0.295141
	167384	0.2	0.6	15	0.441344	0.170052	0.273955	0.250978	0.373293	0.300153	0.387482	0.275073	0.321742	0.467091	0.482454	0.45647	0.46015	0.217443	0.295329
	167384	0.2	0.6	2	0.583291	0.152179	0.297934	0.23128	0.423756	0.299239	0.456237	0.28048	0.347393	0.320589	0.308191	0.305822	0.367887	0.40799	0.386902
	167384	0.2	0.6	3	0.546087	0.161268	0.296759	0.242556	0.429482	0.310023	0.462012	0.29079	0.356929	0.456644	0.432778	0.432908	0.455346	0.392595	0.421649
	167384	0.2	0.6	4	0.511731	0.167008	0.292341	0.24462	0.417788	0.308569	0.446796	0.284899	0.347937	0.466213	0.490206	0.464195	0.44719	0.355517	0.396119
	167384	0.2	0.6	5	0.491202	0.169163	0.288259	0.248282	0.405981	0.308126	0.439318	0.285066	0.345769	0.470283	0.493866	0.468646	0.469118	0.344154	0.397036
	167384	0.2	0.6	6	0.469415	0.169289	0.281899	0.247073	0.391652	0.303	0.417896	0.280491	0.335676	0.467034	0.486085	0.460053	0.464022	0.271821	0.342821
	167384	0.2	0.6	7	0.459946	0.171429	0.280799	0.246872	0.388395	0.301869	0.41169	0.277124	0.331262	0.462195	0.484812	0.455306	0.439735	0.277715	0.340431
	167384	0.2	0.6	8	0.455421	0.172187	0.280031	0.246687	0.384551	0.300564	0.404433	0.275364	0.327645	0.463801	0.482909	0.454212	0.475653	0.24343	0.322044
	167384	0.2	0.6	9	0.449221	0.171814	0.277817	0.250397	0.38006	0.301895	0.397533	0.276861	0.326401	0.453652	0.478864	0.445646	0.440383	0.234201	0.305783
	167384	0.2	0.7	1.2	0.604491	0.140638	0.291572	0.219246	0.377598	0.277416	0.403415	0.265143	0.31998	0.319959	0.309517	0.305086	0.329655	0.444925	0.378713
	167384	0.2	0.7	10	0.449807	0.17186	0.278035	0.252632	0.376091	0.30224	0.394083	0.279318	0.326921	0.456617	0.479004	0.441277	0.479162	0.222886	0.304249
	167384	0.2	0.7	11	0.451064	0.171572	0.27819	0.252126	0.376255	0.30193	0.394033	0.279317	0.326903	0.454207	0.480852	0.447927	0.428322	0.232271	0.301204
	167384	0.2	0.7	13	0.442014	0.171452	0.275289	0.252461	0.373364	0.301234	0.38785	0.277931	0.323817	0.466936	0.480416	0.453202	0.475917	0.223419	0.304085
	167384	0.2	0.7	15	0.444025	0.170315	0.274998	0.25461	0.372619	0.302513	0.387136	0.278749	0.324121	0.462946	0.48337	0.456644	0.437187	0.224037	0.296257
	167384	0.2	0.7	2	0.584632	0.150492	0.296619	0.234904	0.422263	0.301876	0.455565	0.284397	0.350183	0.321463	0.309811	0.306299	0.383468	0.453443	0.41553
	167384	0.2	0.7	3	0.547511	0.160096	0.296065	0.244727	0.425382	0.310703	0.459596	0.293433	0.358182	0.455594	0.427609	0.429949	0.440649	0.349696	0.389939
	167384	0.2	0.7	4	0.515502	0.166459	0.292933	0.247831	0.416441	0.310737	0.44859	0.28876	0.351352	0.465838	0.488071	0.463888	0.424468	0.312773	0.36016
	167384	0.2	0.7	5	0.494386	0.169313	0.28932	0.252061	0.404079	0.31046	0.440025	0.288839	0.348752	0.466175	0.484844	0.462536	0.432874	0.293323	0.34969
	167384	0.2	0.7	6	0.47327	0.169943	0.2836	0.251845	0.393163	0.307023	0.420892	0.284874	0.339776	0.461781	0.484697	0.456823	0.439502	0.260741	0.327304
	167384	0.2	0.7	7	0.464639	0.171478	0.282268	0.251277	0.387936	0.304998	0.41344	0.281711	0.335094	0.466337	0.486078	0.458483	0.485077	0.262046	0.340272
	167384	0.2	0.7	8	0.459695	0.171494	0.280775	0.250956	0.382751	0.303148	0.404441	0.279609	0.330635	0.459205	0.483803	0.454204	0.427685	0.261352	0.324442
	167384	0.2	0.7	9	0.452237	0.171494	0.278489	0.25164	0.377506	0.301983	0.396732	0.278971	0.32759	0.452884	0.479834	0.445544	0.443286	0.242622	0.313601
	167384	0.2	0.8	1.2	0.604324	0.136563	0.287277	0.222835	0.378958	0.280645	0.398851	0.26956	0.321701	0.3198	0.308768	0.30504	0.326223	0.435409	0.37299
	167384	0.2	0.8	10	0.45207	0.169443	0.276767	0.254328	0.372695	0.302339	0.388221	0.281218	0.326168	0.453432	0.476159	0.43876	0.439037	0.211173	0.285178
	167384	0.2	0.8	11	0.453578	0.169002	0.276868	0.25401	0.373409	0.302348	0.389115	0.281573	0.326722	0.456379	0.47991	0.448106	0.444077	0.229952	0.303003
	167384	0.2	0.8	13	0.446707	0.168582	0.274421	0.254823	0.369792	0.301727	0.381845	0.2804	0.323353	0.462196	0.481835	0.454822	0.43017	0.22131	0.29226
	167384	0.2	0.8	15	0.447629	0.168024	0.274249	0.25676	0.368713	0.302717	0.380777	0.281033	0.323389	0.471881	0.483949	0.459174	0.485479	0.240931	0.322041
	167384	0.2	0.8	2	0.584381	0.145102	0.291196	0.235202	0.421402	0.301901	0.446797	0.28506	0.348057	0.320788	0.310479	0.306422	0.362588	0.448133	0.400848
	167384	0.2	0.8	3	0.552371	0.154816	0.292431	0.246537	0.422198	0.311296	0.448889	0.295451	0.356355	0.45464	0.43004	0.431113	0.411459	0.355621	0.381508
	167384	0.2	0.8	4	0.520111	0.161378	0.289714	0.250646	0.415167	0.31258	0.438728	0.291374	0.350181	0.471618	0.49241	0.468952	0.479504	0.353577	0.407023
	167384	0.2	0.8	5	0.502011	0.166567	0.289169	0.254081	0.401738	0.311287	0.430436	0.290252	0.34671	0.466424	0.490401	0.465011	0.448851	0.318541	0.372632
	167384	0.2	0.8	6	0.48123	0.167358	0.283792	0.253251	0.389933	0.307069	0.412799	0.285763	0.33773	0.462828	0.487595	0.460558	0.437471	0.291249	0.34969
	167384	0.2	0.8	7	0.467991	0.168638	0.280929	0.253709	0.385485	0.306013	0.40705	0.283999	0.334569	0.463227	0.48319	0.456179	0.434318	0.246696	0.314662
	167384	0.2	0.8	8	0.463298	0.168531	0.279428	0.253842	0.380837	0.304634	0.39904	0.282372	0.330719	0.462337	0.484037	0.455474	0.441727	0.257488	0.325334
	167384	0.2	0.8	9	0.455338	0.168772	0.277215	0.254151	0.37584	0.303243	0.392248	0.281588	0.327832	0.452931	0.481859	0.447801	0.41833	0.249406	0.312501
	167384	0.25	0.6	1.2	0.59762	0.142506	0.29183	0.218706	0.380073	0.277646	0.416873	0.267366	0.325785	0.355772	0.341911	0.338837	0.367142	0.420753	0.392123
	167384	0.25	0.6	10	0.440003	0.172223	0.27528	0.249445	0.390922	0.304555	0.408423	0.276141	0.329501	0.452252	0.475377	0.439683	0.465825	0.21419	0.29345
	167384	0.25	0.6	11	0.439333	0.172456	0.275255	0.250215	0.39023	0.304917	0.408652	0.277475	0.330524	0.458777	0.47954	0.441298	0.521234	0.242676	0.331167
	167384	0.25	0.6	13	0.43221	0.170474	0.271442	0.252144	0.387103	0.305377	0.40089	0.277236	0.327789	0.461119	0.480014	0.445608	0.480164	0.233027	0.313776
	167384	0.25	0.6	15	0.429697	0.170533	0.270698	0.252706	0.382333	0.30429	0.395576	0.275875	0.325056	0.461183	0.483878	0.451031	0.472602	0.242502	0.320532
	167384	0.25	0.6	2	0.57994	0.152924	0.297803	0.233967	0.422892	0.301261	0.461277	0.287166	0.353969	0.35549	0.342839	0.339308	0.377239	0.428088	0.401058
	167384	0.25	0.6	3	0.545416	0.159838	0.29526	0.242945	0.431608	0.310893	0.473743	0.293422	0.362391	0.377636	0.359002	0.358362	0.45227	0.392355	0.420187
	167384	0.25	0.6	4	0.51634	0.165713	0.292514	0.250372	0.42959	0.316363	0.466603	0.292635	0.359688	0.46672	0.488974	0.464912	0.455135	0.336895	0.387189
	167384	0.25	0.6	5	0.490447	0.167535	0.286648	0.248636	0.420322	0.312447	0.452156	0.287424	0.351444	0.467873	0.488917	0.465019	0.463709	0.30516	0.368087
	167384	0.25	0.6	6	0.471342	0.169964	0.283039	0.248531	0.408888	0.309152	0.43807	0.284982	0.34532	0.463345	0.488867	0.460345	0.444508	0.308803	0.364432
	167384	0.25	0.6	7	0.460868	0.17135	0.281016	0.246065	0.406598	0.306588	0.430945	0.279751	0.339265	0.4634	0.486003	0.457084	0.471719	0.27569	0.347997
	167384	0.25	0.6	8	0.453578	0.172725	0.2799	0.24447	0.400335	0.303564	0.424611	0.276521	0.334926	0.467488	0.48589	0.457561	0.500291	0.280232	0.35924
	167384	0.25	0.6	9	0.444863	0.171781	0.27644	0.248492	0.394242	0.304842	0.412956	0.276542	0.331254	0.452541	0.481557	0.446581	0.434543	0.258623	0.324259
	167384	0.25	0.7	1.2	0.596866	0.145294	0.294485	0.225162	0.384946	0.28413	0.420842	0.273617	0.331624	0.354341	0.337802	0.335947	0.344546	0.377209	0.360138
	167384	0.25	0.7	10	0.441931	0.17412	0.277397	0.24968	0.392251	0.305133	0.410458	0.277152	0.330883	0.453162	0.477204	0.441009	0.456915	0.228448	0.304601
	167384	0.25	0.7	11	0.440255	0.174837	0.27744	0.249614	0.391481	0.304851	0.410306	0.277788	0.331286	0.45448	0.47855	0.44234	0.475192	0.233046	0.312724
	167384	0.25	0.7	13	0.43221	0.172957	0.273411	0.251697	0.388841	0.305587	0.40278	0.27776	0.328786	0.457635	0.477647	0.443395	0.511971	0.209281	0.29711
	167384	0.25	0.7	15	0.431456	0.172178	0.272557	0.254439	0.383453	0.305899	0.396964	0.278275	0.327189	0.456716	0.479712	0.448316	0.481395	0.224447	0.306153
	167384	0.25	0.7	2	0.580359	0.154715	0.29965	0.235949	0.422308	0.302749	0.460694	0.288797	0.355033	0.357778	0.341665	0.340508	0.419468	0.422283	0.42087
	167384	0.25	0.7	3	0.548014	0.160971	0.297009	0.245019	0.430423	0.312275	0.472957	0.295206	0.363516	0.377825	0.358088	0.358165	0.455919	0.383315	0.416477
	167384	0.25	0.7	4	0.519524	0.166538	0.294144	0.252169	0.430662	0.318086	0.466531	0.295069	0.361499	0.468407	0.490212	0.465032	0.467196	0.334414	0.389808
	167384	0.25	0.7	5	0.492626	0.169132	0.28865	0.251495	0.420492	0.314743	0.451513	0.28989	0.353085	0.467801	0.486699	0.462687	0.44724	0.304244	0.362137
	167384	0.25	0.7	6	0.473605	0.171198	0.284746	0.251379	0.408845	0.311334	0.437725	0.287812	0.347281	0.466906	0.490376	0.462131	0.472926	0.319499	0.381359
	167384	0.25	0.7	7	0.462544	0.172074	0.28212	0.248579	0.405831	0.308311	0.43016	0.282024	0.340685	0.464885	0.485285	0.457714	0.471168	0.27459	0.346971
	167384	0.25	0.7	8	0.455924	0.173576	0.281314	0.24686	0.400834	0.305545	0.425384	0.27907	0.337032	0.463437	0.484153	0.45524	0.46639	0.26631	0.339032
	167384	0.25	0.7	9	0.445534	0.173829	0.278292	0.247054	0.395744	0.304202	0.415197	0.276275	0.331781	0.460332	0.479046	0.447478	0.509447	0.232182	0.318985
	167384	0.25	0.8	1.2	0.595106	0.142763	0.291478	0.228487	0.384113	0.286532	0.415337	0.276824	0.332221	0.355104	0.342665	0.338842	0.348669	0.438388	0.388415
	167384	0.25	0.8	10	0.444277	0.173332	0.277502	0.251725	0.388353	0.305457	0.405137	0.279426	0.330739	0.453491	0.479811	0.443212	0.46625	0.238226	0.315335
	167384	0.25	0.8	11	0.443942	0.173751	0.277732	0.252013	0.388197	0.30562	0.405136	0.280717	0.331642	0.453109	0.477492	0.440458	0.472229	0.227054	0.306661
	167384	0.25	0.8	13	0.434473	0.172273	0.273584	0.254452	0.382101	0.305478	0.393994	0.28038	0.327617	0.456342	0.47892	0.445324	0.472218	0.226372	0.306036
	167384	0.25	0.8	15	0.433384	0.172199	0.273182	0.25738	0.376971	0.305902	0.389086	0.280928	0.326277	0.457397	0.47825	0.44683	0.459315	0.209197	0.287466
	167384	0.25	0.8	2	0.578683	0.151545	0.296136	0.23793	0.418855	0.303473	0.450432	0.290644	0.353312	0.354954	0.344079	0.338491	0.379437	0.444416	0.409364
	167384	0.25	0.8	3	0.553796	0.15652	0.294415	0.246115	0.427307	0.312335	0.459563	0.297734	0.361358	0.377681	0.354707	0.356034	0.42752	0.346745	0.382919
	167384	0.25	0.8	4	0.523127	0.164033	0.292934	0.253055	0.426762	0.317715	0.455871	0.297115	0.359757	0.465078	0.490077	0.464302	0.411971	0.327965	0.3652
	167384	0.25	0.8	5	0.49514	0.168261	0.288639	0.254014	0.414555	0.315009	0.44103	0.292928	0.352037	0.467504	0.489218	0.465694	0.441842	0.313866	0.367018
	167384	0.25	0.8	6	0.476789	0.169607	0.284371	0.25359	0.402773	0.311228	0.428139	0.289957	0.345753	0.462463	0.489694	0.460667	0.435096	0.31144	0.363027
	167384	0.25	0.8	7	0.466315	0.170807	0.282223	0.250365	0.398704	0.307584	0.420056	0.283455	0.338493	0.460645	0.484412	0.456516	0.437419	0.268515	0.332761
	167384	0.25	0.8	8	0.459611	0.172418	0.281505	0.248922	0.395739	0.305612	0.417097	0.280877	0.335694	0.461857	0.482807	0.454545	0.443215	0.253386	0.322435
	167384	0.25	0.8	9	0.447042	0.173497	0.278497	0.248616	0.390726	0.303878	0.40721	0.277532	0.330092	0.457215	0.479856	0.447206	0.467269	0.227701	0.306193
	167384	0.3	0.6	1.2	0.592844	0.148074	0.296285	0.227597	0.38681	0.286575	0.430664	0.276747	0.336961	0.352516	0.338351	0.336312	0.380548	0.411142	0.395254
	167384	0.3	0.6	10	0.439584	0.170889	0.27408	0.241335	0.388872	0.297833	0.416326	0.272005	0.329036	0.453978	0.483023	0.446344	0.49184	0.267696	0.346695
	167384	0.3	0.6	11	0.435478	0.170737	0.272676	0.240815	0.387561	0.297053	0.415971	0.271737	0.328728	0.451883	0.479964	0.440308	0.487098	0.257877	0.337223
	167384	0.3	0.6	13	0.431708	0.171566	0.272152	0.242589	0.382925	0.297015	0.406972	0.271826	0.325946	0.460134	0.478858	0.444764	0.534573	0.230129	0.321748
	167384	0.3	0.6	15	0.43221	0.170984	0.271847	0.245875	0.379722	0.29848	0.405595	0.273099	0.326414	0.464976	0.478902	0.448649	0.511089	0.228172	0.315494
	167384	0.3	0.6	2	0.578348	0.154325	0.298753	0.230929	0.415088	0.29676	0.461386	0.283884	0.351497	0.35102	0.335757	0.33358	0.364709	0.399007	0.381088
	167384	0.3	0.6	3	0.550025	0.16087	0.29746	0.237803	0.423181	0.304496	0.468745	0.287494	0.356399	0.391478	0.369709	0.370693	0.420351	0.364313	0.390331
	167384	0.3	0.6	4	0.505447	0.166843	0.290397	0.245734	0.423024	0.310879	0.461691	0.285116	0.352528	0.46599	0.485284	0.462604	0.427863	0.289969	0.345671
	167384	0.3	0.6	5	0.480225	0.169702	0.285474	0.243299	0.416637	0.307203	0.451736	0.279804	0.345566	0.466931	0.488515	0.46355	0.451285	0.312509	0.36929
	167384	0.3	0.6	6	0.463466	0.170028	0.280717	0.241854	0.405893	0.303103	0.436983	0.274758	0.337383	0.461118	0.488693	0.459715	0.436249	0.308621	0.361501
	167384	0.3	0.6	7	0.454332	0.170705	0.27849	0.239659	0.39826	0.299244	0.427615	0.271211	0.33191	0.466182	0.483715	0.457397	0.500571	0.259057	0.341421
	167384	0.3	0.6	8	0.448215	0.170961	0.276817	0.239131	0.393084	0.297363	0.423564	0.27113	0.330623	0.464233	0.484679	0.456782	0.475326	0.264994	0.340282
	167384	0.3	0.6	9	0.444528	0.170871	0.275603	0.241154	0.390674	0.298222	0.418308	0.272297	0.329867	0.458804	0.481892	0.450468	0.496389	0.261682	0.342702
	167384	0.3	0.7	1.2	0.592174	0.147362	0.295404	0.232695	0.389433	0.291319	0.433883	0.282894	0.342485	0.353286	0.33967	0.336441	0.391299	0.442359	0.415266
	167384	0.3	0.7	10	0.444863	0.171149	0.275931	0.246619	0.390521	0.302319	0.418416	0.2779	0.33398	0.458626	0.481359	0.444592	0.524823	0.252766	0.341202
	167384	0.3	0.7	11	0.441009	0.171301	0.274855	0.246132	0.389352	0.301603	0.418258	0.278011	0.33401	0.457021	0.482574	0.444658	0.520477	0.274793	0.359685
	167384	0.3	0.7	13	0.440087	0.170593	0.274	0.246248	0.385251	0.300451	0.409816	0.276775	0.330406	0.450074	0.478201	0.44299	0.43669	0.226092	0.297932
	167384	0.3	0.7	15	0.43992	0.170855	0.274157	0.250924	0.381937	0.30287	0.407589	0.2791	0.331324	0.460534	0.480578	0.44913	0.467036	0.223895	0.302685
	167384	0.3	0.7	2	0.578515	0.152397	0.296924	0.234718	0.415613	0.300007	0.461665	0.288059	0.354762	0.352919	0.339019	0.336279	0.393262	0.43421	0.412723
	167384	0.3	0.7	3	0.554047	0.159591	0.297357	0.241266	0.423208	0.307328	0.47007	0.292449	0.360572	0.390959	0.371882	0.371648	0.419201	0.384527	0.401116
	167384	0.3	0.7	4	0.510642	0.165242	0.290482	0.249735	0.423985	0.314326	0.463251	0.291358	0.357726	0.468256	0.486725	0.464201	0.453927	0.308345	0.367234
	167384	0.3	0.7	5	0.485671	0.168846	0.286362	0.246292	0.415763	0.309337	0.451035	0.285087	0.349356	0.470078	0.483694	0.460877	0.509434	0.270146	0.353066
	167384	0.3	0.7	6	0.472013	0.168795	0.282265	0.246562	0.406325	0.306896	0.437876	0.280483	0.341937	0.465485	0.484608	0.457964	0.464851	0.268828	0.340653
	167384	0.3	0.7	7	0.461957	0.169782	0.280057	0.244451	0.398678	0.303072	0.427915	0.277004	0.336306	0.460845	0.487937	0.45888	0.445967	0.294434	0.354694
	167384	0.3	0.7	8	0.456092	0.170512	0.278871	0.243434	0.395332	0.301322	0.425853	0.276096	0.334999	0.466805	0.482626	0.454614	0.511007	0.254749	0.34
	167384	0.3	0.7	9	0.450561	0.170415	0.277096	0.246105	0.393502	0.30282	0.420515	0.277771	0.334553	0.457495	0.479153	0.446868	0.473938	0.243088	0.321351
	167384	0.3	0.8	1.2	0.590665	0.145774	0.293434	0.235082	0.385609	0.292093	0.426586	0.285664	0.342184	0.35195	0.339534	0.336113	0.370236	0.446084	0.404636
	167384	0.3	0.8	10	0.459108	0.168512	0.278146	0.251237	0.385423	0.304189	0.412607	0.282312	0.335245	0.451288	0.47962	0.44403	0.45424	0.243896	0.31738
	167384	0.3	0.8	11	0.457935	0.168475	0.27776	0.250441	0.383823	0.303108	0.411942	0.282062	0.334849	0.450033	0.483284	0.443366	0.474689	0.264777	0.339939
	167384	0.3	0.8	13	0.456762	0.167477	0.276581	0.252559	0.379406	0.303253	0.403592	0.282066	0.332059	0.451782	0.476947	0.442319	0.452225	0.229629	0.304593
	167384	0.3	0.8	15	0.449472	0.167967	0.274766	0.255988	0.375395	0.304401	0.399656	0.283699	0.331839	0.462328	0.477777	0.447972	0.516122	0.220064	0.308563
	167384	0.3	0.8	2	0.577091	0.150087	0.294302	0.236911	0.408981	0.300026	0.450519	0.290556	0.353273	0.353744	0.34027	0.336698	0.414406	0.445246	0.429273
	167384	0.3	0.8	3	0.555388	0.156828	0.295128	0.242986	0.417597	0.307214	0.45827	0.294741	0.358749	0.391131	0.368683	0.369614	0.413009	0.349238	0.378456
	167384	0.3	0.8	4	0.520362	0.162984	0.291222	0.252341	0.419909	0.31524	0.453285	0.294114	0.35675	0.464932	0.487398	0.463234	0.434169	0.32176	0.369607
	167384	0.3	0.8	5	0.498659	0.166802	0.288405	0.25123	0.412133	0.312168	0.445733	0.290137	0.351485	0.466948	0.490923	0.466305	0.453176	0.348162	0.393788
	167384	0.3	0.8	6	0.485001	0.166338	0.284032	0.250053	0.401944	0.308306	0.432518	0.284245	0.343045	0.461398	0.489169	0.460257	0.423533	0.311642	0.359073
	167384	0.3	0.8	7	0.476119	0.167008	0.281985	0.248391	0.392482	0.304238	0.420788	0.281278	0.337172	0.458131	0.483938	0.454015	0.428749	0.265201	0.327703
	167384	0.3	0.8	8	0.470756	0.167425	0.280743	0.247967	0.389338	0.302973	0.419118	0.280886	0.336354	0.457354	0.48333	0.453506	0.451995	0.268559	0.336928
	167384	0.3	0.8	9	0.464471	0.167375	0.27882	0.250337	0.387599	0.304201	0.415283	0.282019	0.335917	0.451674	0.480466	0.447557	0.419575	0.253519	0.316064
	167384	0.35	0.6	1.2	0.574912	0.14831	0.292002	0.22667	0.399387	0.289204	0.44588	0.277845	0.342356	0.350821	0.335067	0.333986	0.381147	0.407478	0.393873
	167384	0.35	0.6	10	0.431289	0.171515	0.271979	0.243167	0.393939	0.300713	0.420771	0.273423	0.331459	0.454327	0.476331	0.441151	0.472819	0.224599	0.304537
	167384	0.35	0.6	11	0.429613	0.172638	0.272337	0.24312	0.392487	0.300253	0.419795	0.273907	0.33151	0.457834	0.472995	0.435384	0.537592	0.218352	0.310564
	167384	0.35	0.6	13	0.424753	0.172314	0.270538	0.243448	0.3889	0.299446	0.414146	0.272491	0.328706	0.46179	0.480576	0.445499	0.548906	0.246011	0.339751
	167384	0.35	0.6	15	0.423245	0.172758	0.270405	0.242693	0.386767	0.298242	0.412273	0.270752	0.326851	0.456279	0.475157	0.442344	0.483657	0.205719	0.28866
	167384	0.35	0.6	2	0.563767	0.153593	0.294263	0.230731	0.418164	0.297377	0.467201	0.284752	0.353843	0.352346	0.333415	0.333625	0.428063	0.37405	0.399238
	167384	0.35	0.6	3	0.54307	0.159964	0.29474	0.236306	0.428231	0.304554	0.474736	0.289008	0.359289	0.403271	0.380527	0.381873	0.446434	0.357825	0.397248
	167384	0.35	0.6	4	0.501927	0.16462	0.28745	0.242452	0.423687	0.308416	0.460534	0.285266	0.352305	0.470006	0.491685	0.467773	0.483647	0.355632	0.409877
	167384	0.35	0.6	5	0.479722	0.166633	0.282732	0.244246	0.411601	0.306571	0.449981	0.284578	0.348657	0.471138	0.487639	0.464699	0.501289	0.300924	0.376085
	167384	0.35	0.6	6	0.462879	0.167871	0.278754	0.241815	0.405661	0.303007	0.440862	0.277317	0.340468	0.460851	0.485786	0.457012	0.437968	0.270324	0.334307
	167384	0.35	0.6	7	0.450478	0.168329	0.27537	0.242239	0.403438	0.302716	0.435692	0.276515	0.338316	0.470798	0.485802	0.460209	0.50202	0.271555	0.352457
	167384	0.35	0.6	8	0.447042	0.170341	0.275952	0.24254	0.401534	0.302412	0.434939	0.277168	0.338576	0.463111	0.485095	0.455358	0.49156	0.263344	0.342956
	167384	0.35	0.6	9	0.435646	0.171147	0.273056	0.24256	0.393389	0.300088	0.422633	0.273998	0.332459	0.461943	0.478309	0.446699	0.518062	0.224898	0.31364
	167384	0.35	0.7	1.2	0.573571	0.146939	0.29031	0.229719	0.400853	0.292063	0.444747	0.281105	0.344479	0.352526	0.335315	0.335269	0.40881	0.40375	0.406264
	167384	0.35	0.7	10	0.441176	0.167493	0.271835	0.248596	0.392863	0.304506	0.420616	0.278779	0.335315	0.448429	0.478371	0.44122	0.461509	0.240867	0.316532
	167384	0.35	0.7	11	0.44059	0.167941	0.272017	0.248085	0.392536	0.304025	0.419684	0.278997	0.335176	0.4514	0.476493	0.43774	0.51693	0.232373	0.320619
	167384	0.35	0.7	13	0.431875	0.167588	0.26903	0.247741	0.387649	0.302292	0.412369	0.276883	0.33131	0.456805	0.479346	0.443417	0.504569	0.247446	0.332051
	167384	0.35	0.7	15	0.430702	0.167333	0.26846	0.246866	0.385747	0.301062	0.410438	0.275161	0.329454	0.459483	0.477885	0.445308	0.49205	0.219972	0.304028
	167384	0.35	0.7	2	0.564186	0.150879	0.29176	0.233784	0.419873	0.30034	0.465003	0.287864	0.355594	0.349437	0.336034	0.332836	0.378069	0.413418	0.394954
	167384	0.35	0.7	3	0.544411	0.156487	0.291879	0.239508	0.427875	0.307109	0.471274	0.292383	0.360875	0.402376	0.383703	0.382843	0.413508	0.384951	0.398719
	167384	0.35	0.7	4	0.508296	0.161194	0.286242	0.245189	0.423479	0.310565	0.457104	0.289576	0.354546	0.470175	0.4842	0.461447	0.467189	0.29898	0.36462
	167384	0.35	0.7	5	0.487515	0.162977	0.281875	0.247506	0.413574	0.309681	0.449736	0.289015	0.351893	0.467091	0.49157	0.466502	0.451146	0.340476	0.388075
	167384	0.35	0.7	6	0.470588	0.164281	0.278045	0.247688	0.407261	0.308035	0.441783	0.283955	0.345708	0.466144	0.489709	0.463036	0.465505	0.301195	0.365744
	167384	0.35	0.7	7	0.46246	0.164717	0.275998	0.248087	0.404723	0.307614	0.437141	0.282789	0.343418	0.473131	0.484241	0.457689	0.566435	0.260511	0.356886
	167384	0.35	0.7	8	0.458941	0.166392	0.276341	0.248253	0.400971	0.30665	0.434521	0.283327	0.343002	0.462411	0.483991	0.455534	0.481002	0.262841	0.339929
	167384	0.35	0.7	9	0.446288	0.167282	0.273232	0.247472	0.393767	0.303931	0.424015	0.279209	0.336703	0.462346	0.479154	0.447995	0.517601	0.239612	0.327579
	167384	0.35	0.8	1.2	0.572063	0.142502	0.285517	0.23297	0.400673	0.294629	0.44157	0.285883	0.347066	0.349131	0.334779	0.332214	0.370352	0.394162	0.381886
	167384	0.35	0.8	10	0.4545	0.162645	0.271887	0.252888	0.390681	0.307033	0.416394	0.286069	0.339142	0.450312	0.478994	0.442282	0.449309	0.239258	0.312244
	167384	0.35	0.8	11	0.45341	0.16287	0.271748	0.253834	0.390551	0.307689	0.416779	0.287569	0.340322	0.45287	0.476198	0.437799	0.520924	0.240397	0.328977
	167384	0.35	0.8	13	0.445785	0.162968	0.269534	0.253928	0.384396	0.305829	0.408509	0.285282	0.335952	0.454714	0.477127	0.441203	0.478467	0.227831	0.308679
	167384	0.35	0.8	15	0.440758	0.163185	0.268189	0.254506	0.381615	0.305361	0.405895	0.285827	0.335441	0.465158	0.479512	0.447573	0.523543	0.232524	0.322026
	167384	0.35	0.8	2	0.562678	0.145013	0.28565	0.235802	0.417947	0.3015	0.458989	0.290667	0.355931	0.351041	0.333875	0.333206	0.409854	0.380196	0.394468
	167384	0.35	0.8	3	0.549187	0.150633	0.28762	0.242745	0.427276	0.3096	0.467542	0.29762	0.363714	0.401386	0.386089	0.381982	0.412625	0.437143	0.42453
	167384	0.35	0.8	4	0.518183	0.155317	0.283695	0.248342	0.424092	0.31325	0.453929	0.296052	0.358373	0.468892	0.494094	0.467571	0.469366	0.391328	0.426809
	167384	0.35	0.8	5	0.50067	0.157876	0.281147	0.249512	0.413855	0.311327	0.445703	0.293186	0.353703	0.46635	0.489639	0.463107	0.432502	0.335532	0.377895
	167384	0.35	0.8	6	0.480057	0.15883	0.276129	0.250522	0.406525	0.310004	0.436822	0.288684	0.347629	0.462008	0.483264	0.456502	0.4301	0.266605	0.329169
	167384	0.35	0.8	7	0.472348	0.159684	0.274639	0.250694	0.402866	0.309064	0.431403	0.287667	0.345169	0.46711	0.485909	0.45961	0.501733	0.290058	0.367601
	167384	0.35	0.8	8	0.470002	0.161021	0.2751	0.251512	0.397662	0.308135	0.428144	0.289224	0.345233	0.469499	0.484047	0.457021	0.526829	0.268145	0.355399
	167384	0.35	0.8	9	0.457265	0.162688	0.272748	0.251424	0.391858	0.306312	0.420349	0.285979	0.340383	0.454745	0.483243	0.448167	0.463823	0.26366	0.336204
	167384	0.4	0.6	1.2	0.567622	0.155881	0.297458	0.220347	0.408339	0.286236	0.463003	0.276595	0.346308	0.378023	0.363186	0.35968	0.420058	0.433696	0.426768
	167384	0.4	0.6	10	0.435814	0.175523	0.276578	0.237944	0.398681	0.298021	0.42849	0.272023	0.332782	0.456713	0.47806	0.442984	0.509946	0.241722	0.327978
	167384	0.4	0.6	11	0.432043	0.175427	0.275303	0.236	0.392705	0.294823	0.422606	0.270064	0.329539	0.452988	0.477986	0.436077	0.509388	0.251516	0.336756
	167384	0.4	0.6	13	0.423245	0.176033	0.272956	0.235191	0.39071	0.293629	0.416687	0.267794	0.326047	0.452896	0.475594	0.438053	0.5062	0.22204	0.30868
	167384	0.4	0.6	15	0.420814	0.176103	0.272225	0.235822	0.388935	0.293616	0.416162	0.267491	0.325661	0.455708	0.4801	0.443613	0.474693	0.255426	0.332134
	167384	0.4	0.6	2	0.559326	0.158482	0.29773	0.225356	0.418795	0.293031	0.475779	0.283271	0.355114	0.377491	0.361766	0.359791	0.400855	0.402353	0.401603
	167384	0.4	0.6	3	0.542735	0.16091	0.295519	0.231368	0.428417	0.300467	0.48	0.287467	0.359583	0.397221	0.377839	0.376954	0.49242	0.41313	0.449304
	167384	0.4	0.6	4	0.498994	0.165337	0.287232	0.237027	0.422845	0.303773	0.463252	0.281902	0.350509	0.465054	0.489747	0.46407	0.445531	0.331851	0.380379
	167384	0.4	0.6	5	0.475281	0.168854	0.28329	0.238336	0.414154	0.302557	0.454303	0.28106	0.347275	0.464623	0.48692	0.4623	0.440105	0.3038	0.359465
	167384	0.4	0.6	6	0.465393	0.170398	0.281606	0.237306	0.409024	0.300354	0.446985	0.276988	0.342028	0.469484	0.492846	0.464263	0.509221	0.31518	0.389364
	167384	0.4	0.6	7	0.457852	0.171581	0.280283	0.236338	0.404445	0.298341	0.440256	0.2737	0.33755	0.465321	0.484679	0.457435	0.514998	0.274733	0.358316
	167384	0.4	0.6	8	0.445534	0.173149	0.277748	0.23523	0.403754	0.297269	0.439907	0.272382	0.336444	0.456862	0.490165	0.455051	0.456944	0.301151	0.363039
	167384	0.4	0.6	9	0.438663	0.17371	0.276043	0.236065	0.399019	0.296636	0.429926	0.271511	0.33283	0.454682	0.479322	0.44605	0.459236	0.249787	0.323575
	167384	0.4	0.7	1.2	0.564941	0.151727	0.292774	0.224641	0.411089	0.290524	0.460832	0.280721	0.348904	0.376525	0.36016	0.358057	0.379716	0.395993	0.387684
	167384	0.4	0.7	10	0.442769	0.168827	0.273407	0.239903	0.392295	0.297732	0.421441	0.275024	0.332842	0.462012	0.485972	0.448802	0.518902	0.288653	0.370953
	167384	0.4	0.7	11	0.440506	0.168949	0.272806	0.238713	0.387229	0.295352	0.417062	0.274388	0.331005	0.451123	0.477187	0.437945	0.509537	0.235295	0.321929
	167384	0.4	0.7	13	0.431708	0.168864	0.27	0.238603	0.384343	0.294425	0.411259	0.272093	0.327505	0.454266	0.479282	0.439308	0.51398	0.246244	0.332966
	167384	0.4	0.7	15	0.43154	0.169176	0.270197	0.23983	0.383111	0.294993	0.41121	0.27223	0.327589	0.454474	0.476734	0.440674	0.47629	0.213532	0.294868
	167384	0.4	0.7	2	0.557818	0.154173	0.293259	0.22849	0.421543	0.296349	0.473006	0.286021	0.356482	0.378218	0.366523	0.361152	0.402486	0.475557	0.435981
	167384	0.4	0.7	3	0.542819	0.156019	0.291015	0.234469	0.426602	0.302615	0.4743	0.29083	0.360568	0.395989	0.371068	0.372893	0.472472	0.343012	0.397466
	167384	0.4	0.7	4	0.505866	0.159025	0.283628	0.238119	0.419989	0.303924	0.455302	0.285368	0.350841	0.467726	0.495817	0.468216	0.470112	0.413279	0.439868
	167384	0.4	0.7	5	0.486006	0.162048	0.280635	0.24127	0.411879	0.304292	0.446723	0.286178	0.348866	0.468742	0.484173	0.461688	0.471626	0.279991	0.351378
	167384	0.4	0.7	6	0.476202	0.163579	0.2791	0.240467	0.403691	0.301399	0.438347	0.282291	0.343422	0.46257	0.490129	0.461699	0.458453	0.335892	0.387717
	167384	0.4	0.7	7	0.467991	0.164967	0.277855	0.239382	0.399344	0.299332	0.432031	0.278259	0.3385	0.459863	0.485972	0.456687	0.447784	0.289049	0.351319
	167384	0.4	0.7	8	0.454332	0.166646	0.275159	0.238262	0.397864	0.298042	0.432258	0.276904	0.337565	0.464763	0.484222	0.455746	0.513577	0.2759	0.358962
	167384	0.4	0.7	9	0.446958	0.167947	0.273981	0.238267	0.392811	0.296616	0.42345	0.275082	0.33351	0.455881	0.483115	0.449868	0.476191	0.257826	0.334528
	167384	0.4	0.8	1.2	0.563935	0.149036	0.289908	0.227515	0.410253	0.292705	0.454365	0.285307	0.350516	0.37956	0.363486	0.361828	0.417086	0.434223	0.425482
	167384	0.4	0.8	10	0.460533	0.164601	0.275325	0.245787	0.390465	0.301677	0.418493	0.284815	0.33895	0.457403	0.481868	0.447277	0.507008	0.284992	0.364882
	167384	0.4	0.8	11	0.458522	0.164567	0.274695	0.245184	0.385691	0.29979	0.414982	0.284484	0.33756	0.447702	0.483829	0.440769	0.473029	0.290145	0.359674
	167384	0.4	0.8	13	0.449388	0.164397	0.271805	0.244844	0.381507	0.298266	0.407403	0.281671	0.333066	0.454695	0.48039	0.442956	0.493663	0.260489	0.341028
	167384	0.4	0.8	15	0.444612	0.164238	0.270226	0.244416	0.380654	0.297688	0.407345	0.279401	0.331455	0.454185	0.477093	0.441735	0.475924	0.226982	0.30737
	167384	0.4	0.8	2	0.557818	0.150292	0.289544	0.230316	0.419118	0.297273	0.463959	0.288908	0.356083	0.378755	0.358795	0.359217	0.418573	0.379286	0.397962
	167384	0.4	0.8	3	0.547092	0.151802	0.288183	0.236237	0.427578	0.304331	0.470319	0.294395	0.362122	0.395166	0.372507	0.374119	0.454067	0.365887	0.405236
	167384	0.4	0.8	4	0.516172	0.154593	0.282483	0.24091	0.418742	0.305856	0.452731	0.291192	0.354423	0.466936	0.490756	0.465751	0.456823	0.355569	0.399886
	167384	0.4	0.8	5	0.500084	0.156779	0.280004	0.24242	0.411969	0.30523	0.444815	0.289529	0.350753	0.464201	0.489707	0.463485	0.420593	0.329719	0.369653
	167384	0.4	0.8	6	0.491453	0.158676	0.279252	0.243999	0.402544	0.303832	0.435229	0.288971	0.347331	0.464088	0.490416	0.46149	0.477952	0.333759	0.393048
	167384	0.4	0.8	7	0.48366	0.160126	0.278292	0.244327	0.398695	0.302981	0.42864	0.286183	0.343217	0.462854	0.487067	0.45834	0.478591	0.300298	0.369038
	167384	0.4	0.8	8	0.471342	0.16185	0.276201	0.243319	0.39721	0.301778	0.428698	0.285639	0.342843	0.465541	0.487117	0.458718	0.491161	0.294051	0.367866
	167384	0.4	0.8	9	0.464806	0.163681	0.275826	0.244582	0.391846	0.301176	0.420491	0.285373	0.34	0.459726	0.480109	0.448154	0.47922	0.248941	0.327668
	179341	0.2	0.6	1.2	0.606419	0.139802	0.291168	0.209824	0.367271	0.26707	0.395879	0.25822	0.312564	0.320749	0.311533	0.306307	0.321763	0.443514	0.372953
	179341	0.2	0.6	10	0.447042	0.17347	0.278475	0.25259	0.376824	0.302447	0.392038	0.276452	0.324253	0.447549	0.478747	0.441263	0.42023	0.250955	0.314246
	179341	0.2	0.6	11	0.446791	0.173464	0.278392	0.252667	0.375878	0.302196	0.390001	0.276596	0.323652	0.461695	0.477683	0.445934	0.467274	0.218723	0.297971
	179341	0.2	0.6	13	0.445618	0.171774	0.276668	0.254402	0.374732	0.30306	0.386978	0.277896	0.323488	0.460283	0.486954	0.454597	0.412771	0.272019	0.32793
	179341	0.2	0.6	15	0.444025	0.171464	0.275925	0.254663	0.370384	0.301811	0.383397	0.277385	0.321887	0.459852	0.485203	0.45719	0.414707	0.248011	0.310394
	179341	0.2	0.6	2	0.58547	0.151837	0.298154	0.230175	0.417702	0.296799	0.449956	0.281409	0.346262	0.323486	0.306427	0.306478	0.39715	0.383523	0.390218
	179341	0.2	0.6	3	0.546506	0.162532	0.298034	0.243581	0.425828	0.309896	0.458062	0.290643	0.355634	0.449169	0.431915	0.426759	0.416978	0.403814	0.41029
	179341	0.2	0.6	4	0.511228	0.1681	0.293151	0.245159	0.414606	0.308123	0.441373	0.283307	0.345102	0.467281	0.4947	0.466347	0.464491	0.371174	0.412622
	179341	0.2	0.6	5	0.479051	0.169663	0.285092	0.246266	0.4022	0.305485	0.432626	0.280154	0.340082	0.466798	0.490857	0.465385	0.43926	0.323372	0.372511
	179341	0.2	0.6	6	0.465561	0.171263	0.282371	0.248886	0.393571	0.304936	0.419578	0.27866	0.334899	0.460415	0.486533	0.457328	0.414673	0.285469	0.33815
	179341	0.2	0.6	7	0.457852	0.172536	0.281062	0.248882	0.386014	0.302639	0.407881	0.276678	0.329707	0.463836	0.490562	0.460009	0.459191	0.280663	0.348387
	179341	0.2	0.6	8	0.457014	0.173554	0.281632	0.249803	0.382491	0.302224	0.402711	0.276086	0.327588	0.465622	0.482532	0.454017	0.497806	0.238724	0.322697
	179341	0.2	0.6	9	0.453997	0.172815	0.280103	0.253516	0.379705	0.304037	0.39736	0.278749	0.327651	0.452649	0.479555	0.446101	0.429831	0.228851	0.298679
	179341	0.2	0.7	1.2	0.605916	0.141869	0.29319	0.213793	0.373422	0.271911	0.399209	0.262339	0.316616	0.323209	0.312349	0.307331	0.357163	0.472582	0.406845
	179341	0.2	0.7	10	0.44788	0.173808	0.279007	0.252289	0.373027	0.301002	0.389458	0.276929	0.323693	0.454586	0.482606	0.446942	0.470381	0.258117	0.333325
	179341	0.2	0.7	11	0.448467	0.17425	0.279544	0.25203	0.373526	0.300979	0.388726	0.276919	0.323433	0.455051	0.48179	0.448202	0.431149	0.245672	0.312996
	179341	0.2	0.7	13	0.445869	0.173129	0.277836	0.253457	0.372191	0.301557	0.385409	0.277963	0.322985	0.466494	0.482496	0.455602	0.482262	0.231777	0.313084
	179341	0.2	0.7	15	0.445282	0.172478	0.277131	0.255947	0.368387	0.302042	0.381708	0.279003	0.322373	0.470794	0.481895	0.456676	0.487843	0.222301	0.305426
	179341	0.2	0.7	2	0.585302	0.151633	0.297912	0.232402	0.41576	0.298146	0.447248	0.283619	0.347117	0.32293	0.309602	0.307942	0.387058	0.414429	0.400276
	179341	0.2	0.7	3	0.548098	0.161283	0.297319	0.244652	0.419139	0.308962	0.452519	0.291736	0.35476	0.453552	0.426863	0.427375	0.452642	0.361896	0.402215
	179341	0.2	0.7	4	0.51458	0.168081	0.294094	0.247195	0.41013	0.308469	0.437805	0.286066	0.346032	0.465581	0.4927	0.465092	0.427247	0.355181	0.387895
	179341	0.2	0.7	5	0.482236	0.169965	0.286292	0.248063	0.397863	0.305593	0.428445	0.282699	0.340637	0.469971	0.486655	0.464668	0.474606	0.302381	0.369407
	179341	0.2	0.7	6	0.467572	0.172014	0.2836	0.250789	0.391514	0.305735	0.416721	0.280925	0.335607	0.465227	0.483033	0.45683	0.444203	0.262889	0.3303
	179341	0.2	0.7	7	0.459695	0.172965	0.281977	0.250752	0.384318	0.303489	0.405698	0.278845	0.330518	0.460182	0.485996	0.4578	0.420368	0.270863	0.329447
	179341	0.2	0.7	8	0.458941	0.173553	0.282224	0.251564	0.379116	0.302442	0.399912	0.278208	0.328138	0.463098	0.482324	0.453532	0.44396	0.247248	0.317613
	179341	0.2	0.7	9	0.4545	0.172792	0.280239	0.25272	0.375268	0.302037	0.394205	0.278951	0.326711	0.45424	0.481482	0.447581	0.427261	0.237699	0.30546
	179341	0.2	0.8	1.2	0.605832	0.136102	0.28715	0.218896	0.372068	0.275632	0.391236	0.267587	0.317808	0.320166	0.305991	0.303885	0.31076	0.384505	0.343722
	179341	0.2	0.8	10	0.450478	0.168147	0.275221	0.256119	0.370609	0.302906	0.384586	0.280261	0.324238	0.448865	0.476249	0.440368	0.407203	0.22069	0.286245
	179341	0.2	0.8	11	0.451316	0.169041	0.276208	0.255811	0.372122	0.303194	0.384698	0.28029	0.324298	0.455051	0.484135	0.449708	0.423647	0.254296	0.317819
	179341	0.2	0.8	13	0.449305	0.168725	0.275334	0.257337	0.368856	0.303166	0.380106	0.28157	0.323501	0.460258	0.485222	0.456674	0.414678	0.236452	0.301173
	179341	0.2	0.8	15	0.446958	0.167349	0.273492	0.259641	0.365814	0.303716	0.376188	0.28243	0.322635	0.464527	0.47826	0.4528	0.431485	0.19856	0.271967
	179341	0.2	0.8	2	0.58723	0.14365	0.290441	0.234444	0.411637	0.298742	0.436397	0.286023	0.34556	0.322729	0.309537	0.307655	0.37685	0.41509	0.395046
	179341	0.2	0.8	3	0.551533	0.152508	0.290023	0.247353	0.415986	0.310235	0.438632	0.294157	0.352153	0.451255	0.429417	0.427876	0.425938	0.385722	0.404833
	179341	0.2	0.8	4	0.512904	0.160623	0.287027	0.249791	0.409312	0.310247	0.429622	0.287767	0.34467	0.469553	0.488481	0.465123	0.46677	0.328752	0.385788
	179341	0.2	0.8	5	0.485504	0.164067	0.282232	0.251997	0.393519	0.307244	0.418363	0.285628	0.339482	0.471206	0.48678	0.461652	0.481478	0.279282	0.35351
	179341	0.2	0.8	6	0.472348	0.166079	0.280084	0.253963	0.386383	0.306481	0.407787	0.283677	0.334594	0.466085	0.486107	0.460799	0.443831	0.282993	0.345616
	179341	0.2	0.8	7	0.463633	0.167904	0.279009	0.254321	0.37995	0.304694	0.398117	0.282115	0.330225	0.460731	0.485236	0.456483	0.445338	0.260173	0.328456
	179341	0.2	0.8	8	0.462209	0.167728	0.278434	0.255824	0.376602	0.30468	0.394581	0.281888	0.328848	0.461569	0.485795	0.456251	0.452136	0.261253	0.331157
	179341	0.2	0.8	9	0.457852	0.168	0.277343	0.256963	0.373811	0.304564	0.39072	0.282834	0.328137	0.453868	0.479204	0.446134	0.432522	0.243883	0.311898
	179341	0.25	0.6	1.2	0.597872	0.14203	0.291403	0.216153	0.376515	0.274639	0.413908	0.264161	0.322499	0.342541	0.32728	0.326027	0.343313	0.395172	0.367422
	179341	0.25	0.6	10	0.443858	0.172093	0.276378	0.248345	0.386695	0.30245	0.409028	0.275242	0.329056	0.462643	0.482785	0.4486	0.527265	0.270666	0.357707
	179341	0.25	0.6	11	0.440841	0.172346	0.27564	0.248566	0.386064	0.30242	0.408269	0.275447	0.328957	0.452461	0.474448	0.438426	0.459886	0.210133	0.288461
	179341	0.25	0.6	13	0.439249	0.171448	0.274424	0.248319	0.383786	0.301537	0.401492	0.274634	0.326162	0.468888	0.485507	0.454575	0.538185	0.24009	0.332049
	179341	0.25	0.6	15	0.435814	0.171461	0.273359	0.249556	0.379198	0.301011	0.397709	0.274616	0.324894	0.463585	0.486156	0.458529	0.470607	0.255265	0.330994
	179341	0.25	0.6	2	0.58128	0.152567	0.297799	0.235017	0.418189	0.300921	0.456954	0.285824	0.351675	0.343715	0.330082	0.327703	0.394633	0.422001	0.407858
	179341	0.25	0.6	3	0.542567	0.16112	0.295666	0.240036	0.429409	0.307938	0.470923	0.28919	0.358331	0.394352	0.372143	0.372232	0.483349	0.365093	0.41598
	179341	0.25	0.6	4	0.512234	0.166168	0.291748	0.244381	0.426005	0.310589	0.46454	0.285359	0.353543	0.471288	0.487065	0.464032	0.490954	0.334488	0.397892
	179341	0.25	0.6	5	0.486844	0.168528	0.286438	0.245389	0.416004	0.30869	0.449094	0.283093	0.347276	0.467807	0.48393	0.461742	0.461175	0.280055	0.348487
	179341	0.25	0.6	6	0.473689	0.169511	0.283364	0.244421	0.403792	0.304515	0.435117	0.278202	0.3394	0.467902	0.488718	0.463301	0.476332	0.29248	0.362423
	179341	0.25	0.6	7	0.462628	0.17164	0.28179	0.239681	0.397778	0.299125	0.423135	0.270987	0.330386	0.465229	0.489272	0.461166	0.490969	0.293106	0.367072
	179341	0.25	0.6	8	0.459695	0.173384	0.282318	0.240416	0.39541	0.299022	0.419951	0.27021	0.328836	0.458836	0.483022	0.453543	0.445574	0.252401	0.322256
	179341	0.25	0.6	9	0.446874	0.172513	0.277654	0.245114	0.390568	0.3012	0.412427	0.272816	0.328399	0.455899	0.478282	0.446069	0.452102	0.228467	0.303541
	179341	0.25	0.7	1.2	0.597536	0.142378	0.291678	0.224118	0.381402	0.282333	0.414525	0.272138	0.328569	0.342262	0.329881	0.325845	0.340928	0.430283	0.380429
	179341	0.25	0.7	10	0.44721	0.171345	0.276816	0.251286	0.385424	0.304225	0.407448	0.278809	0.331072	0.458869	0.481974	0.447295	0.510645	0.251422	0.336945
	179341	0.25	0.7	11	0.444193	0.172571	0.276866	0.250847	0.385449	0.303911	0.407048	0.278443	0.330682	0.450911	0.477176	0.44156	0.454583	0.232644	0.307776
	179341	0.25	0.7	13	0.441093	0.172373	0.27574	0.251063	0.384858	0.303886	0.401473	0.278054	0.328555	0.458893	0.481184	0.449792	0.445616	0.214122	0.289255
	179341	0.25	0.7	15	0.438663	0.171782	0.274507	0.25503	0.380509	0.305382	0.397279	0.279946	0.328448	0.459644	0.488468	0.457031	0.421833	0.245217	0.310144
	179341	0.25	0.7	2	0.582286	0.151968	0.297471	0.236948	0.413468	0.301255	0.448783	0.287725	0.350644	0.343938	0.328146	0.327122	0.385251	0.404197	0.394497
	179341	0.25	0.7	3	0.547428	0.158454	0.29452	0.243546	0.426567	0.310063	0.46468	0.292855	0.359281	0.39162	0.372337	0.370762	0.437187	0.358662	0.394051
	179341	0.25	0.7	4	0.517178	0.164944	0.29207	0.248357	0.425772	0.313719	0.461951	0.289658	0.356057	0.465423	0.489899	0.464581	0.42817	0.327485	0.37112
	179341	0.25	0.7	5	0.491202	0.168076	0.287331	0.249198	0.416038	0.311697	0.44677	0.287038	0.349519	0.468031	0.484516	0.461183	0.478647	0.282311	0.355151
	179341	0.25	0.7	6	0.477543	0.16833	0.283522	0.248629	0.40297	0.307521	0.431515	0.282515	0.341469	0.464902	0.489193	0.460197	0.448887	0.293876	0.355207
	179341	0.25	0.7	7	0.467655	0.1692	0.281296	0.244349	0.39615	0.302261	0.419432	0.275754	0.332746	0.458773	0.488326	0.457954	0.41093	0.284238	0.336039
	179341	0.25	0.7	8	0.46355	0.171246	0.281746	0.246163	0.392978	0.302709	0.416475	0.27569	0.331765	0.46124	0.484082	0.455533	0.454422	0.269103	0.338029
	179341	0.25	0.7	9	0.449975	0.171339	0.277666	0.2475	0.3901	0.302854	0.411532	0.276011	0.330415	0.453112	0.484803	0.448796	0.475119	0.26522	0.340415
	179341	0.25	0.8	1.2	0.595777	0.141179	0.290019	0.225916	0.382262	0.283993	0.412111	0.274677	0.329643	0.343079	0.327822	0.326981	0.347521	0.390826	0.367904
	179341	0.25	0.8	10	0.44788	0.169145	0.275239	0.252774	0.382032	0.304243	0.401002	0.28053	0.330118	0.450717	0.47976	0.443459	0.436047	0.23834	0.308213
	179341	0.25	0.8	11	0.446791	0.170204	0.275764	0.252967	0.382121	0.304411	0.400858	0.281199	0.330532	0.451937	0.485124	0.444598	0.460693	0.246179	0.320887
	179341	0.25	0.8	13	0.442769	0.170309	0.274604	0.253576	0.379617	0.304052	0.394632	0.280572	0.327968	0.457571	0.479813	0.449979	0.424169	0.213326	0.283881
	179341	0.25	0.8	15	0.440087	0.169245	0.272915	0.257688	0.375316	0.305573	0.390887	0.283538	0.328669	0.461908	0.482175	0.454466	0.450209	0.230064	0.304516
	179341	0.25	0.8	2	0.581448	0.148869	0.29421	0.237385	0.411571	0.301102	0.444359	0.28947	0.350568	0.343511	0.330109	0.327865	0.381135	0.413825	0.396808
	179341	0.25	0.8	3	0.551533	0.15525	0.292619	0.244989	0.423132	0.310311	0.454003	0.295795	0.358208	0.393752	0.369619	0.371277	0.458184	0.351829	0.398024
	179341	0.25	0.8	4	0.520278	0.162215	0.290512	0.24909	0.422387	0.313376	0.451672	0.291553	0.354365	0.465419	0.487969	0.462913	0.437258	0.318865	0.368793
	179341	0.25	0.8	5	0.492626	0.16481	0.284938	0.250306	0.408453	0.310397	0.433698	0.288809	0.346726	0.469424	0.488614	0.464491	0.479107	0.30509	0.372791
	179341	0.25	0.8	6	0.48056	0.165017	0.281604	0.249698	0.395721	0.306191	0.421021	0.283436	0.338793	0.463112	0.486652	0.460405	0.438524	0.290607	0.349561
	179341	0.25	0.8	7	0.471342	0.166648	0.280265	0.246055	0.39024	0.301811	0.410738	0.27701	0.330873	0.462537	0.487599	0.458259	0.450943	0.280697	0.346013
	179341	0.25	0.8	8	0.466734	0.168091	0.280096	0.248201	0.38769	0.302647	0.408219	0.277942	0.330713	0.456545	0.483007	0.453295	0.436056	0.270053	0.333541
	179341	0.25	0.8	9	0.452824	0.168962	0.276605	0.248757	0.386603	0.302727	0.405223	0.277928	0.329716	0.458921	0.479835	0.44831	0.472584	0.245433	0.323078
	179341	0.3	0.6	1.2	0.596615	0.144808	0.293929	0.22813	0.383708	0.286139	0.42954	0.277686	0.33731	0.358883	0.345351	0.342255	0.375068	0.426225	0.399014
	179341	0.3	0.6	10	0.43992	0.167247	0.271248	0.243493	0.384589	0.298193	0.414799	0.27433	0.330248	0.453848	0.479743	0.444868	0.465922	0.234314	0.311815
	179341	0.3	0.6	11	0.438746	0.167041	0.270719	0.242563	0.382697	0.296926	0.412902	0.274127	0.329499	0.449838	0.475301	0.435621	0.48488	0.223387	0.305862
	179341	0.3	0.6	13	0.433467	0.167955	0.26982	0.244306	0.379212	0.297164	0.404824	0.274159	0.326919	0.460426	0.47973	0.445295	0.528763	0.230726	0.321267
	179341	0.3	0.6	15	0.433132	0.167544	0.269386	0.248163	0.37545	0.298816	0.402156	0.275435	0.326946	0.468677	0.481228	0.451738	0.555705	0.237895	0.333164
	179341	0.3	0.6	2	0.582956	0.150663	0.296361	0.232774	0.411182	0.297264	0.460019	0.286647	0.353205	0.359225	0.343235	0.341258	0.408044	0.407659	0.407852
	179341	0.3	0.6	3	0.554885	0.158902	0.296938	0.240815	0.421746	0.306577	0.473408	0.291267	0.360645	0.388628	0.368173	0.366889	0.498018	0.401875	0.444811
	179341	0.3	0.6	4	0.510726	0.164083	0.289485	0.244146	0.414902	0.307403	0.453291	0.284016	0.349222	0.471081	0.492836	0.468697	0.479202	0.355629	0.40827
	179341	0.3	0.6	5	0.482487	0.165388	0.282484	0.244266	0.407085	0.305325	0.444385	0.281838	0.34492	0.470781	0.490187	0.466643	0.490205	0.309136	0.379162
	179341	0.3	0.6	6	0.467153	0.166812	0.279153	0.242753	0.401603	0.302598	0.435315	0.276895	0.338486	0.468993	0.491072	0.46421	0.527864	0.311879	0.392096
	179341	0.3	0.6	7	0.450561	0.168022	0.275144	0.24173	0.395307	0.300006	0.425965	0.274983	0.334214	0.467391	0.485902	0.459422	0.501152	0.268987	0.350076
	179341	0.3	0.6	8	0.445701	0.167492	0.273224	0.240176	0.391685	0.297766	0.42143	0.271979	0.330599	0.461719	0.484907	0.455751	0.478207	0.261885	0.338431
	179341	0.3	0.6	9	0.441344	0.167156	0.271613	0.243302	0.386619	0.298657	0.415141	0.273806	0.329977	0.457233	0.480284	0.447821	0.461332	0.238498	0.314439
	179341	0.3	0.7	1.2	0.596363	0.144786	0.293846	0.231889	0.38543	0.289565	0.430758	0.282282	0.341061	0.359667	0.342609	0.34205	0.381249	0.386262	0.383739
	179341	0.3	0.7	10	0.445115	0.166886	0.27255	0.249709	0.38801	0.303863	0.416834	0.27982	0.334854	0.461118	0.479993	0.445731	0.519275	0.247045	0.334806
	179341	0.3	0.7	11	0.443607	0.166761	0.271985	0.24843	0.384848	0.301946	0.413947	0.279709	0.333839	0.45533	0.474612	0.434902	0.509749	0.222297	0.309586
	179341	0.3	0.7	13	0.44059	0.166968	0.271228	0.248987	0.382319	0.301573	0.406662	0.278903	0.330878	0.454452	0.478001	0.442827	0.506342	0.21957	0.306312
	179341	0.3	0.7	15	0.440925	0.167252	0.271561	0.25352	0.378857	0.303768	0.403652	0.28079	0.331194	0.461164	0.481848	0.450576	0.491831	0.256056	0.336779
	179341	0.3	0.7	2	0.583627	0.149919	0.295799	0.235947	0.411445	0.299908	0.459607	0.290059	0.35566	0.358443	0.34193	0.341005	0.362112	0.369726	0.365879
	179341	0.3	0.7	3	0.560332	0.157886	0.297436	0.243948	0.421752	0.309105	0.473628	0.295878	0.364223	0.384594	0.367669	0.366014	0.432727	0.425355	0.429009
	179341	0.3	0.7	4	0.517513	0.162437	0.289937	0.248143	0.4188	0.311638	0.455552	0.288851	0.353536	0.47004	0.488508	0.465795	0.480449	0.326	0.388434
	179341	0.3	0.7	5	0.488269	0.164071	0.283039	0.249022	0.411658	0.310322	0.447292	0.286829	0.349523	0.468606	0.487047	0.463863	0.459839	0.297804	0.361494
	179341	0.3	0.7	6	0.472683	0.165512	0.279705	0.249392	0.407296	0.30936	0.439164	0.283079	0.344256	0.466243	0.488499	0.461109	0.490476	0.294039	0.367664
	179341	0.3	0.7	7	0.457433	0.166152	0.275687	0.247797	0.399102	0.305755	0.428397	0.28027	0.338852	0.465712	0.481222	0.453444	0.489441	0.25405	0.334483
	179341	0.3	0.7	8	0.451232	0.166109	0.273777	0.245878	0.393289	0.302585	0.42189	0.276984	0.334414	0.466127	0.484051	0.456422	0.512728	0.256361	0.341816
	179341	0.3	0.7	9	0.446288	0.166282	0.272415	0.248979	0.39149	0.30438	0.418381	0.278654	0.334513	0.460946	0.479292	0.447693	0.486516	0.228809	0.311241
	179341	0.3	0.8	1.2	0.594687	0.141496	0.29008	0.235242	0.382962	0.291453	0.424623	0.28616	0.341905	0.360853	0.346644	0.342838	0.392564	0.453447	0.420815
	179341	0.3	0.8	10	0.463298	0.162924	0.274741	0.254489	0.384616	0.306305	0.412434	0.285658	0.337534	0.450299	0.477966	0.44247	0.453888	0.246102	0.319155
	179341	0.3	0.8	11	0.461538	0.163463	0.274672	0.253154	0.382021	0.304515	0.410531	0.285237	0.336603	0.449891	0.479942	0.438296	0.465518	0.260796	0.334305
	179341	0.3	0.8	13	0.457349	0.163617	0.273551	0.255127	0.380265	0.305373	0.40415	0.284542	0.33396	0.450709	0.478716	0.441979	0.445809	0.239846	0.311893
	179341	0.3	0.8	15	0.452656	0.16429	0.272703	0.25838	0.376729	0.306528	0.401024	0.285804	0.33375	0.452794	0.481615	0.447385	0.440556	0.244024	0.31408
	179341	0.3	0.8	2	0.582453	0.145907	0.29152	0.23898	0.406595	0.301028	0.449976	0.293126	0.354998	0.360101	0.347762	0.343786	0.391235	0.458579	0.422238
	179341	0.3	0.8	3	0.560499	0.153158	0.292993	0.245064	0.414884	0.308125	0.460636	0.297773	0.361718	0.385567	0.367936	0.366891	0.420644	0.405898	0.413139
	179341	0.3	0.8	4	0.519608	0.157908	0.286444	0.253363	0.414441	0.314475	0.446108	0.294972	0.355128	0.462856	0.486836	0.461646	0.426517	0.333101	0.374065
	179341	0.3	0.8	5	0.501089	0.159882	0.283046	0.255129	0.409443	0.31437	0.440519	0.293688	0.352421	0.464531	0.485016	0.461173	0.41307	0.303327	0.349793
	179341	0.3	0.8	6	0.487515	0.160754	0.279946	0.253085	0.402381	0.31073	0.431007	0.287736	0.345092	0.463505	0.486412	0.459748	0.454084	0.285579	0.350638
	179341	0.3	0.8	7	0.474778	0.161683	0.277063	0.25128	0.394849	0.307114	0.42366	0.285411	0.341058	0.461531	0.48389	0.456424	0.4531	0.265945	0.335166
	179341	0.3	0.8	8	0.469248	0.162356	0.276017	0.250309	0.389657	0.304812	0.418577	0.282705	0.337478	0.466439	0.482637	0.454917	0.51517	0.265081	0.350045
	179341	0.3	0.8	9	0.464723	0.16285	0.2751	0.253447	0.388525	0.306775	0.416933	0.28462	0.338299	0.450384	0.483626	0.447941	0.427329	0.289061	0.344851
	179341	0.35	0.6	1.2	0.580107	0.149353	0.294348	0.227563	0.399858	0.290054	0.445284	0.278111	0.342381	0.351693	0.336459	0.334837	0.410482	0.425206	0.417714
	179341	0.35	0.6	10	0.437825	0.174526	0.276427	0.24393	0.392571	0.300895	0.421964	0.275981	0.333706	0.453994	0.479269	0.444239	0.476769	0.247151	0.325544
	179341	0.35	0.6	11	0.437573	0.174362	0.276217	0.244616	0.392248	0.301321	0.421821	0.2768	0.334258	0.446057	0.478059	0.438032	0.463296	0.239858	0.316076
	179341	0.35	0.6	13	0.432797	0.174449	0.274775	0.24532	0.386369	0.300097	0.414596	0.276315	0.331617	0.461328	0.47882	0.444005	0.531253	0.230057	0.321074
	179341	0.35	0.6	15	0.430367	0.174	0.273649	0.244067	0.384436	0.298577	0.413038	0.274181	0.329581	0.455122	0.481636	0.446783	0.460447	0.239654	0.315234
	179341	0.35	0.6	2	0.571393	0.1539	0.296542	0.23239	0.417334	0.29854	0.465416	0.285409	0.353835	0.350314	0.336025	0.333143	0.389433	0.408613	0.398792
	179341	0.35	0.6	3	0.548182	0.159958	0.296118	0.238631	0.427206	0.306215	0.474812	0.290712	0.360625	0.399788	0.375642	0.377072	0.45262	0.363298	0.40307
	179341	0.35	0.6	4	0.509134	0.165143	0.289965	0.242999	0.423156	0.308716	0.460193	0.288522	0.354677	0.467191	0.491651	0.466615	0.444421	0.367456	0.40229
	179341	0.35	0.6	5	0.491285	0.167805	0.287124	0.246522	0.411641	0.308369	0.450059	0.287244	0.350675	0.468852	0.486075	0.463752	0.496688	0.30772	0.380008
	179341	0.35	0.6	6	0.465058	0.170112	0.281268	0.242635	0.404178	0.303234	0.436978	0.277159	0.339185	0.465712	0.489382	0.461948	0.461432	0.28905	0.355443
	179341	0.35	0.6	7	0.454248	0.171126	0.278808	0.242092	0.401097	0.30194	0.432043	0.275794	0.336673	0.467103	0.488952	0.461765	0.501729	0.300545	0.375912
	179341	0.35	0.6	8	0.446791	0.17359	0.278493	0.242949	0.400043	0.302306	0.43062	0.276447	0.336725	0.468933	0.484484	0.456133	0.548364	0.257084	0.350056
	179341	0.35	0.6	9	0.439668	0.173099	0.275874	0.244149	0.395655	0.301964	0.425681	0.27642	0.335184	0.463312	0.48356	0.45198	0.52194	0.270562	0.356383
	179341	0.35	0.7	1.2	0.57885	0.147859	0.292555	0.230416	0.399448	0.292251	0.443681	0.281291	0.344299	0.355743	0.33775	0.336672	0.459671	0.448311	0.45392
	179341	0.35	0.7	10	0.444947	0.17061	0.275522	0.247161	0.391918	0.303145	0.421397	0.27961	0.336164	0.450684	0.490664	0.445794	0.443135	0.318553	0.370656
	179341	0.35	0.7	11	0.443858	0.17023	0.274878	0.246828	0.393038	0.303228	0.421564	0.279519	0.336152	0.452916	0.475719	0.437382	0.500907	0.23447	0.319422
	179341	0.35	0.7	13	0.438244	0.17035	0.27323	0.248343	0.386779	0.302473	0.414038	0.279382	0.333636	0.456619	0.477527	0.442737	0.507725	0.22291	0.309804
	179341	0.35	0.7	15	0.4364	0.1696	0.272055	0.246837	0.384196	0.300567	0.411962	0.276952	0.331228	0.456578	0.481238	0.448814	0.458682	0.234791	0.310594
	179341	0.35	0.7	2	0.571728	0.15123	0.294045	0.234263	0.415213	0.299531	0.461866	0.287664	0.354522	0.35265	0.335385	0.335081	0.42502	0.392971	0.408367
	179341	0.35	0.7	3	0.547595	0.15722	0.293416	0.240243	0.423286	0.306517	0.469915	0.292484	0.360553	0.39692	0.379515	0.374797	0.412149	0.398947	0.405441
	179341	0.35	0.7	4	0.518016	0.161713	0.28943	0.247241	0.420858	0.311491	0.455522	0.293459	0.356957	0.467057	0.489296	0.465048	0.441074	0.328555	0.376589
	179341	0.35	0.7	5	0.499665	0.163598	0.285909	0.247774	0.411259	0.309239	0.448164	0.289941	0.352094	0.468304	0.489666	0.4652	0.47059	0.320236	0.38112
	179341	0.35	0.7	6	0.472851	0.165935	0.280111	0.245231	0.404272	0.305279	0.43618	0.280651	0.341543	0.466839	0.485754	0.459847	0.475365	0.276468	0.349607
	179341	0.35	0.7	7	0.461622	0.167546	0.278106	0.244799	0.402503	0.30444	0.432508	0.279082	0.339255	0.464867	0.48026	0.452947	0.484394	0.24285	0.323509
	179341	0.35	0.7	8	0.455589	0.168914	0.277408	0.245867	0.399457	0.304384	0.429969	0.279931	0.339095	0.466019	0.48362	0.455311	0.512955	0.275355	0.358348
	179341	0.35	0.7	9	0.448299	0.168718	0.275021	0.247276	0.395362	0.304257	0.425164	0.279951	0.337605	0.45961	0.477464	0.445708	0.478177	0.245502	0.324435
	179341	0.35	0.8	1.2	0.577426	0.142215	0.286563	0.233049	0.400914	0.294757	0.440217	0.285136	0.346098	0.352262	0.331474	0.332094	0.417892	0.363602	0.388861
	179341	0.35	0.8	10	0.456595	0.163879	0.273543	0.252251	0.389188	0.306103	0.416394	0.285808	0.338958	0.448957	0.480001	0.442461	0.457929	0.25062	0.323947
	179341	0.35	0.8	11	0.453997	0.1651	0.273779	0.252655	0.390453	0.306791	0.417727	0.286835	0.340122	0.448475	0.476636	0.438475	0.474491	0.235325	0.314615
	179341	0.35	0.8	13	0.447712	0.16509	0.271869	0.253167	0.38338	0.304955	0.409805	0.285281	0.336389	0.451114	0.481264	0.44395	0.45324	0.248938	0.321367
	179341	0.35	0.8	15	0.444025	0.16485	0.27055	0.251755	0.380791	0.303112	0.408416	0.283401	0.334613	0.459643	0.478821	0.446008	0.501585	0.224513	0.310185
	179341	0.35	0.8	2	0.57022	0.144839	0.287385	0.235767	0.414396	0.300543	0.45581	0.289326	0.353969	0.352132	0.332915	0.333612	0.418712	0.367758	0.391584
	179341	0.35	0.8	3	0.549774	0.151189	0.288305	0.243889	0.426068	0.310209	0.464607	0.296715	0.362149	0.397514	0.382793	0.378427	0.420665	0.433383	0.426929
	179341	0.35	0.8	4	0.521032	0.155768	0.284886	0.25022	0.422722	0.314362	0.451936	0.2966	0.35815	0.466672	0.487539	0.463973	0.437408	0.321159	0.370376
	179341	0.35	0.8	5	0.50067	0.157393	0.280717	0.251583	0.412819	0.312637	0.443642	0.292506	0.352559	0.468492	0.493437	0.467186	0.456867	0.353631	0.398674
	179341	0.35	0.8	6	0.481314	0.159432	0.277015	0.250243	0.405363	0.309452	0.43308	0.286738	0.345033	0.464524	0.486732	0.460471	0.456754	0.286545	0.352161
	179341	0.35	0.8	7	0.472599	0.161946	0.276651	0.24974	0.402363	0.308191	0.429866	0.285112	0.342835	0.465653	0.484595	0.457565	0.481353	0.281166	0.354981
	179341	0.35	0.8	8	0.467404	0.16287	0.27591	0.250545	0.398581	0.307683	0.427175	0.285945	0.342575	0.462434	0.483581	0.454421	0.48533	0.269731	0.34675
	179341	0.35	0.8	9	0.460365	0.162936	0.27388	0.251862	0.392781	0.306919	0.42153	0.28593	0.340735	0.454144	0.483808	0.450624	0.439407	0.276432	0.339367
	179341	0.4	0.6	1.2	0.563851	0.158413	0.298867	0.22061	0.407183	0.286173	0.46336	0.276858	0.346614	0.374297	0.359821	0.357132	0.408758	0.429769	0.419
	179341	0.4	0.6	10	0.433467	0.176545	0.276634	0.238967	0.396609	0.298238	0.425479	0.273626	0.33306	0.457353	0.484692	0.448417	0.521524	0.271214	0.35685
	179341	0.4	0.6	11	0.42978	0.176719	0.275591	0.236747	0.392352	0.295305	0.421942	0.272399	0.331067	0.44962	0.477727	0.439937	0.489291	0.252354	0.332975
	179341	0.4	0.6	13	0.424501	0.177786	0.274719	0.236119	0.388126	0.293615	0.41688	0.271479	0.328823	0.453641	0.47434	0.43579	0.515496	0.218023	0.30644
	179341	0.4	0.6	15	0.420228	0.177365	0.273009	0.235931	0.385461	0.292704	0.41423	0.270036	0.32694	0.452342	0.47903	0.444633	0.468072	0.235986	0.313777
	179341	0.4	0.6	2	0.556226	0.161095	0.299341	0.226406	0.416775	0.293417	0.475696	0.284645	0.356168	0.373617	0.355596	0.355381	0.401001	0.384525	0.392591
	179341	0.4	0.6	3	0.539383	0.163435	0.296908	0.231944	0.425233	0.300164	0.479626	0.288657	0.360407	0.389464	0.368604	0.368559	0.488337	0.424123	0.453971
	179341	0.4	0.6	4	0.494302	0.168274	0.288406	0.235513	0.418264	0.301346	0.46045	0.2818	0.349626	0.467098	0.491525	0.464003	0.459776	0.335407	0.387866
	179341	0.4	0.6	5	0.471678	0.17154	0.28445	0.237393	0.412069	0.301241	0.453466	0.281432	0.347313	0.470261	0.487851	0.464938	0.497541	0.307105	0.379788
	179341	0.4	0.6	6	0.459779	0.172791	0.281861	0.235053	0.405613	0.29763	0.44165	0.274429	0.338514	0.463752	0.486024	0.459183	0.468656	0.286816	0.355852
	179341	0.4	0.6	7	0.449723	0.17452	0.280153	0.23559	0.401415	0.296919	0.434833	0.272675	0.335171	0.467095	0.487324	0.460339	0.492749	0.287416	0.363061
	179341	0.4	0.6	8	0.442601	0.174657	0.278034	0.235653	0.397765	0.295964	0.431613	0.272687	0.334219	0.463535	0.481739	0.452684	0.500699	0.255475	0.338324
	179341	0.4	0.6	9	0.437741	0.175035	0.276803	0.23757	0.394896	0.296665	0.426497	0.273913	0.333584	0.459733	0.479451	0.443831	0.510316	0.24782	0.333625
	179341	0.4	0.7	1.2	0.56117	0.154781	0.294717	0.224215	0.408519	0.289525	0.460445	0.28055	0.348661	0.371047	0.354304	0.353151	0.368751	0.36506	0.366896
	179341	0.4	0.7	10	0.44059	0.17214	0.275397	0.24157	0.394095	0.299533	0.422395	0.2769	0.334512	0.458207	0.480132	0.445222	0.504764	0.249245	0.333709
	179341	0.4	0.7	11	0.438663	0.172416	0.275014	0.239657	0.390083	0.296904	0.419181	0.276255	0.333031	0.455761	0.478862	0.441635	0.491218	0.249925	0.331293
	179341	0.4	0.7	13	0.433719	0.173086	0.27399	0.239656	0.38683	0.295956	0.416179	0.275657	0.331647	0.454378	0.476067	0.437779	0.521712	0.225533	0.314926
	179341	0.4	0.7	15	0.431205	0.172569	0.272787	0.239488	0.383412	0.294823	0.413421	0.273929	0.32952	0.454264	0.476644	0.442215	0.483912	0.212281	0.295106
	179341	0.4	0.7	2	0.554299	0.157583	0.295547	0.228459	0.418165	0.295485	0.472616	0.286444	0.356699	0.373816	0.351494	0.352905	0.416813	0.342811	0.376207
	179341	0.4	0.7	3	0.537959	0.159946	0.293333	0.234484	0.424744	0.302159	0.476992	0.291188	0.361619	0.386256	0.36408	0.364975	0.449099	0.368822	0.405021
	179341	0.4	0.7	4	0.500838	0.163352	0.28603	0.237325	0.418625	0.30292	0.458059	0.28571	0.351916	0.464689	0.489407	0.464163	0.425803	0.339182	0.377589
	179341	0.4	0.7	5	0.482236	0.166541	0.283394	0.240725	0.40963	0.303244	0.448241	0.286509	0.349575	0.46461	0.489603	0.463317	0.45493	0.320383	0.375982
	179341	0.4	0.7	6	0.471007	0.168105	0.281387	0.238794	0.402214	0.299673	0.436517	0.279614	0.340877	0.464556	0.490135	0.461573	0.452545	0.330968	0.382324
	179341	0.4	0.7	7	0.45936	0.170775	0.280084	0.238566	0.39866	0.298503	0.43206	0.276885	0.33749	0.45952	0.488525	0.455962	0.44768	0.311513	0.367385
	179341	0.4	0.7	8	0.451818	0.170824	0.277815	0.238605	0.394797	0.297443	0.42853	0.276907	0.336424	0.463048	0.481573	0.45315	0.490731	0.253513	0.334317
	179341	0.4	0.7	9	0.446874	0.171078	0.276496	0.240864	0.392828	0.298625	0.424065	0.278107	0.335917	0.456008	0.478679	0.445844	0.483437	0.246856	0.326826
	179341	0.4	0.8	1.2	0.560164	0.149984	0.289854	0.227404	0.407951	0.292024	0.454136	0.285535	0.35062	0.373294	0.358444	0.355354	0.393517	0.40637	0.39984
	179341	0.4	0.8	10	0.45936	0.166074	0.276203	0.247297	0.390393	0.30279	0.420243	0.286774	0.34091	0.453543	0.480482	0.442206	0.512694	0.266089	0.350348
	179341	0.4	0.8	11	0.456595	0.166205	0.275478	0.245286	0.385459	0.299797	0.416777	0.285914	0.33916	0.449905	0.477224	0.439292	0.498731	0.251219	0.334131
	179341	0.4	0.8	13	0.446791	0.167131	0.273263	0.245528	0.382425	0.299055	0.41112	0.28444	0.336244	0.450369	0.476263	0.437521	0.500926	0.244689	0.328778
	179341	0.4	0.8	15	0.44612	0.166771	0.272764	0.244967	0.379712	0.297807	0.410494	0.281653	0.334082	0.451381	0.47831	0.441549	0.47515	0.231962	0.311738
	179341	0.4	0.8	2	0.554299	0.152238	0.290491	0.230606	0.41698	0.296974	0.464489	0.289646	0.356799	0.375988	0.358994	0.357031	0.441342	0.41965	0.430223
	179341	0.4	0.8	3	0.542232	0.154468	0.289409	0.236406	0.427387	0.304423	0.47317	0.29508	0.363484	0.384919	0.361989	0.363842	0.433286	0.337676	0.379552
	179341	0.4	0.8	4	0.511731	0.157411	0.283817	0.240136	0.418097	0.305059	0.454767	0.292038	0.355673	0.468377	0.491325	0.465622	0.469824	0.365372	0.411067
	179341	0.4	0.8	5	0.497067	0.159769	0.281808	0.242223	0.410473	0.304662	0.447098	0.290826	0.352415	0.466403	0.489606	0.464947	0.452089	0.338115	0.386883
	179341	0.4	0.8	6	0.487682	0.160598	0.279859	0.243062	0.401549	0.302823	0.43507	0.287678	0.346345	0.466989	0.488152	0.462651	0.475573	0.317498	0.380781
	179341	0.4	0.8	7	0.47813	0.163152	0.279299	0.242694	0.399379	0.301919	0.431338	0.285014	0.343232	0.46345	0.48616	0.45907	0.464281	0.29084	0.357642
	179341	0.4	0.8	8	0.469666	0.16378	0.277348	0.243004	0.39432	0.300699	0.427808	0.285163	0.342216	0.45938	0.485826	0.455017	0.457784	0.298099	0.361074
	179341	0.4	0.8	9	0.464387	0.164531	0.276417	0.245863	0.391467	0.302033	0.422873	0.287312	0.342154	0.45528	0.482427	0.449054	0.48007	0.273177	0.34821
	191297	0.2	0.6	1.2	0.605162	0.14235	0.293504	0.20646	0.374056	0.266065	0.401076	0.253962	0.310999	0.324895	0.307199	0.307632	0.392154	0.395601	0.39387
	191297	0.2	0.6	10	0.443271	0.174614	0.278211	0.245832	0.381034	0.298853	0.394437	0.270956	0.321239	0.451961	0.477964	0.44141	0.462055	0.217986	0.296222
	191297	0.2	0.6	11	0.443271	0.173547	0.27736	0.246305	0.379716	0.298795	0.390793	0.271064	0.320099	0.459839	0.480642	0.449464	0.461461	0.227032	0.304336
	191297	0.2	0.6	13	0.440255	0.173125	0.276078	0.247655	0.376019	0.298627	0.384484	0.270671	0.317691	0.464324	0.480656	0.453616	0.45978	0.230696	0.307236
	191297	0.2	0.6	15	0.441344	0.17159	0.275191	0.248083	0.37093	0.297317	0.380656	0.270402	0.316193	0.457976	0.487822	0.456618	0.373816	0.265242	0.310306
	191297	0.2	0.6	2	0.582202	0.154878	0.300284	0.226049	0.424325	0.294963	0.455774	0.276988	0.34457	0.325878	0.309669	0.308447	0.440087	0.436124	0.438097
	191297	0.2	0.6	3	0.542651	0.164521	0.298793	0.237846	0.432598	0.306936	0.465329	0.285429	0.353825	0.44042	0.419621	0.418856	0.421774	0.383497	0.401726
	191297	0.2	0.6	4	0.509134	0.171175	0.295213	0.244233	0.42268	0.309583	0.448776	0.283922	0.347804	0.463718	0.495413	0.464993	0.418433	0.382871	0.399863
	191297	0.2	0.6	5	0.474443	0.173396	0.286821	0.244995	0.411502	0.307133	0.439953	0.280379	0.342491	0.467157	0.487558	0.463524	0.445883	0.287507	0.349594
	191297	0.2	0.6	6	0.46179	0.173611	0.283146	0.242194	0.399408	0.30154	0.425184	0.274094	0.333316	0.468066	0.489055	0.463663	0.47692	0.302132	0.369918
	191297	0.2	0.6	7	0.455086	0.175258	0.282414	0.241545	0.392403	0.299024	0.414466	0.272002	0.328451	0.46727	0.486684	0.460293	0.49682	0.274718	0.353801
	191297	0.2	0.6	8	0.449975	0.175648	0.281136	0.242725	0.388601	0.298809	0.407811	0.270753	0.32544	0.46114	0.483544	0.454675	0.452138	0.253433	0.324805
	191297	0.2	0.6	9	0.447712	0.174952	0.279872	0.247137	0.385646	0.301232	0.402641	0.273459	0.325708	0.460674	0.482149	0.451833	0.46341	0.237663	0.314191
	191297	0.2	0.7	1.2	0.604659	0.14037	0.291335	0.211749	0.376505	0.271055	0.400016	0.260321	0.315392	0.321714	0.311149	0.306806	0.336238	0.462103	0.389248
	191297	0.2	0.7	10	0.446791	0.170089	0.27567	0.248295	0.376074	0.29911	0.389438	0.274033	0.321699	0.452988	0.477922	0.443342	0.444476	0.222458	0.296513
	191297	0.2	0.7	11	0.446372	0.169634	0.275172	0.248491	0.37645	0.29937	0.38773	0.274081	0.321147	0.453529	0.480378	0.448647	0.390608	0.230056	0.289566
	191297	0.2	0.7	13	0.444109	0.169455	0.274329	0.250209	0.373348	0.29962	0.381285	0.27401	0.318867	0.460975	0.479283	0.451376	0.429125	0.211867	0.283677
	191297	0.2	0.7	15	0.443271	0.168282	0.27312	0.253344	0.368942	0.300406	0.377908	0.275917	0.318957	0.464916	0.483352	0.457364	0.443482	0.2301	0.302993
	191297	0.2	0.7	2	0.58371	0.150939	0.296824	0.23092	0.420029	0.298005	0.450058	0.281438	0.346313	0.324383	0.309259	0.308512	0.411138	0.420164	0.415602
	191297	0.2	0.7	3	0.545249	0.158964	0.294406	0.242104	0.42664	0.308911	0.456704	0.289606	0.354448	0.438063	0.415948	0.414362	0.411416	0.341068	0.372954
	191297	0.2	0.7	4	0.506704	0.166152	0.290155	0.248184	0.420059	0.312018	0.443171	0.28816	0.349238	0.46307	0.491844	0.462107	0.427664	0.360222	0.391057
	191297	0.2	0.7	5	0.480225	0.169082	0.284951	0.249731	0.407329	0.309629	0.435529	0.286511	0.345643	0.47048	0.485871	0.462917	0.476004	0.28896	0.359615
	191297	0.2	0.7	6	0.468745	0.169827	0.282145	0.246978	0.396822	0.304462	0.422045	0.279223	0.33609	0.462892	0.487883	0.460988	0.421313	0.28749	0.341769
	191297	0.2	0.7	7	0.460365	0.171441	0.280936	0.24713	0.391117	0.302882	0.412228	0.277615	0.331788	0.462625	0.488063	0.459486	0.45009	0.276329	0.342427
	191297	0.2	0.7	8	0.456846	0.171268	0.27972	0.248398	0.38447	0.301805	0.403776	0.27643	0.328182	0.463211	0.484713	0.455667	0.471414	0.272779	0.345587
	191297	0.2	0.7	9	0.451064	0.170563	0.277371	0.249861	0.380814	0.301742	0.397768	0.27693	0.326528	0.459879	0.480659	0.450731	0.446824	0.23538	0.308335
	191297	0.2	0.8	1.2	0.604575	0.136675	0.287454	0.215217	0.377612	0.274172	0.395682	0.263721	0.316497	0.322001	0.307613	0.306477	0.349767	0.39719	0.371974
	191297	0.2	0.8	10	0.44855	0.167254	0.273901	0.251214	0.374814	0.300813	0.384226	0.276798	0.321782	0.452433	0.477422	0.441911	0.438079	0.2143	0.287809
	191297	0.2	0.8	11	0.448299	0.167413	0.273954	0.251388	0.375162	0.301049	0.383015	0.276735	0.321314	0.459834	0.478829	0.448205	0.445985	0.209879	0.285434
	191297	0.2	0.8	13	0.445534	0.166909	0.272697	0.252814	0.371221	0.300784	0.376193	0.276609	0.318805	0.463711	0.480454	0.45264	0.442191	0.223735	0.297131
	191297	0.2	0.8	15	0.444361	0.165514	0.271197	0.255822	0.366328	0.301261	0.372816	0.278279	0.318685	0.464871	0.483405	0.457686	0.438593	0.222603	0.295319
	191297	0.2	0.8	2	0.585721	0.145273	0.291701	0.232362	0.416817	0.298385	0.441575	0.283293	0.345153	0.322184	0.307207	0.306481	0.379179	0.38878	0.38392
	191297	0.2	0.8	3	0.548433	0.154082	0.290695	0.245149	0.424698	0.31086	0.445527	0.293089	0.353578	0.444325	0.414317	0.416055	0.465456	0.336864	0.390855
	191297	0.2	0.8	4	0.510558	0.161773	0.287393	0.249849	0.418008	0.312758	0.433882	0.290642	0.348103	0.465942	0.488793	0.464975	0.413268	0.335805	0.370532
	191297	0.2	0.8	5	0.482487	0.165543	0.282617	0.252544	0.403849	0.310758	0.425776	0.289647	0.34476	0.469564	0.486145	0.462547	0.475154	0.299667	0.367538
	191297	0.2	0.8	6	0.470923	0.166938	0.280384	0.24983	0.394316	0.305869	0.413828	0.282642	0.33588	0.463573	0.492107	0.462747	0.441711	0.312051	0.365729
	191297	0.2	0.8	7	0.462963	0.169287	0.279953	0.249543	0.387721	0.303651	0.403657	0.280112	0.330723	0.462883	0.486075	0.458339	0.445794	0.268291	0.334981
	191297	0.2	0.8	8	0.459025	0.168554	0.278156	0.250744	0.382021	0.302765	0.396897	0.278863	0.327572	0.460504	0.481185	0.451107	0.431782	0.24766	0.314774
	191297	0.2	0.8	9	0.453243	0.168683	0.276503	0.25193	0.378122	0.302389	0.391449	0.27916	0.325903	0.456366	0.48392	0.451394	0.422311	0.237383	0.303927
	191297	0.25	0.6	1.2	0.598374	0.144241	0.293785	0.213921	0.37753	0.273097	0.414351	0.263618	0.322228	0.360622	0.348202	0.343742	0.338327	0.422953	0.375937
	191297	0.25	0.6	10	0.440087	0.175232	0.2777	0.244651	0.38693	0.299765	0.408372	0.272237	0.32669	0.455997	0.476375	0.442096	0.489689	0.218889	0.302543
	191297	0.25	0.6	11	0.436819	0.174829	0.276349	0.245963	0.385998	0.300465	0.406077	0.273732	0.327022	0.44938	0.477066	0.43907	0.462671	0.237744	0.314091
	191297	0.25	0.6	13	0.434892	0.174182	0.275228	0.24564	0.383946	0.299602	0.400379	0.272174	0.324057	0.44944	0.475312	0.440286	0.436714	0.205092	0.279108
	191297	0.25	0.6	15	0.435059	0.172996	0.274342	0.246368	0.380735	0.299157	0.395362	0.271452	0.321894	0.458029	0.477556	0.445479	0.469184	0.216192	0.295994
	191297	0.25	0.6	2	0.579688	0.15371	0.298503	0.228059	0.418245	0.295169	0.457364	0.281142	0.348228	0.364819	0.345306	0.345839	0.427258	0.376622	0.400345
	191297	0.25	0.6	3	0.543405	0.162402	0.29707	0.236847	0.428089	0.304966	0.468843	0.287366	0.356329	0.375755	0.357302	0.356899	0.418743	0.362891	0.388822
	191297	0.25	0.6	4	0.516256	0.168317	0.294779	0.246175	0.422171	0.311001	0.459538	0.287012	0.35334	0.468875	0.477147	0.466612	0.468726	0.347818	0.39932
	191297	0.25	0.6	5	0.488688	0.169535	0.287836	0.241311	0.40785	0.303218	0.44345	0.278724	0.342301	0.467672	0.483765	0.461363	0.464126	0.286443	0.354253
	191297	0.25	0.6	6	0.472683	0.170637	0.284002	0.241672	0.398643	0.300917	0.433326	0.27691	0.337895	0.462061	0.488859	0.461075	0.441027	0.309972	0.364065
	191297	0.25	0.6	7	0.460784	0.174119	0.283252	0.23922	0.394029	0.297702	0.42562	0.274041	0.333411	0.465775	0.489812	0.461239	0.499413	0.31985	0.389953
	191297	0.25	0.6	8	0.451316	0.174685	0.280781	0.239244	0.391366	0.296956	0.41807	0.271631	0.329304	0.462134	0.482724	0.453381	0.453315	0.250502	0.322687
	191297	0.25	0.6	9	0.443523	0.17516	0.278724	0.242818	0.389417	0.299121	0.414587	0.272345	0.328739	0.462677	0.480651	0.450887	0.477794	0.232857	0.313115
	191297	0.25	0.7	1.2	0.597872	0.141297	0.29065	0.222009	0.383091	0.281109	0.418736	0.272783	0.330357	0.361834	0.349166	0.34482	0.334527	0.440619	0.380313
	191297	0.25	0.7	10	0.443942	0.169927	0.274659	0.245523	0.387724	0.300657	0.410065	0.274828	0.329095	0.458866	0.479957	0.446561	0.493176	0.23639	0.319592
	191297	0.25	0.7	11	0.442182	0.169994	0.274168	0.246516	0.386223	0.300946	0.407516	0.275818	0.328976	0.45215	0.475837	0.437562	0.471559	0.221435	0.301358
	191297	0.25	0.7	13	0.438746	0.170319	0.273362	0.247627	0.38537	0.301512	0.402412	0.275491	0.32707	0.457502	0.478162	0.444085	0.469403	0.224564	0.303793
	191297	0.25	0.7	15	0.438746	0.168937	0.272251	0.250899	0.38116	0.302607	0.396774	0.277245	0.326411	0.453728	0.481239	0.448795	0.433461	0.233487	0.303495
	191297	0.25	0.7	2	0.580945	0.149767	0.294969	0.232372	0.420108	0.299232	0.458711	0.285247	0.351756	0.365031	0.34742	0.347029	0.421323	0.400319	0.410553
	191297	0.25	0.7	3	0.551701	0.156559	0.293895	0.241408	0.429556	0.309102	0.470218	0.292626	0.36075	0.375623	0.361465	0.357857	0.40158	0.418575	0.409901
	191297	0.25	0.7	4	0.514664	0.162424	0.289125	0.248419	0.426431	0.313947	0.46158	0.289618	0.355917	0.472258	0.475133	0.465317	0.503469	0.31142	0.384814
	191297	0.25	0.7	5	0.492291	0.16338	0.283603	0.245112	0.411659	0.307269	0.444392	0.284091	0.346605	0.466327	0.490755	0.465432	0.445882	0.332631	0.381019
	191297	0.25	0.7	6	0.477711	0.164713	0.280509	0.244566	0.40335	0.304501	0.435953	0.280722	0.341526	0.465658	0.488159	0.461179	0.473468	0.290827	0.360325
	191297	0.25	0.7	7	0.462293	0.167999	0.278683	0.243749	0.398044	0.302349	0.427159	0.278747	0.337352	0.467111	0.487701	0.460136	0.500188	0.28484	0.362977
	191297	0.25	0.7	8	0.456008	0.168974	0.277585	0.24333	0.394845	0.301101	0.420972	0.275163	0.332797	0.461101	0.485999	0.456908	0.463135	0.276747	0.346464
	191297	0.25	0.7	9	0.44855	0.170051	0.276182	0.244498	0.392542	0.301318	0.417812	0.275423	0.331994	0.461869	0.485701	0.454798	0.48826	0.274307	0.351269
	191297	0.25	0.8	1.2	0.597453	0.140603	0.289834	0.224805	0.383689	0.283504	0.414947	0.275582	0.331201	0.362181	0.346569	0.34492	0.345551	0.415284	0.377222
	191297	0.25	0.8	10	0.447126	0.167549	0.273707	0.249379	0.389436	0.304054	0.409826	0.278912	0.331927	0.452452	0.481312	0.446493	0.450796	0.247788	0.319795
	191297	0.25	0.8	11	0.444109	0.167647	0.272862	0.250414	0.387901	0.304351	0.4068	0.279986	0.331685	0.453221	0.477561	0.439901	0.487922	0.232554	0.314982
	191297	0.25	0.8	13	0.440003	0.169123	0.27279	0.25144	0.385354	0.304317	0.401068	0.279244	0.329249	0.460122	0.478083	0.445015	0.51147	0.215194	0.302933
	191297	0.25	0.8	15	0.439333	0.168791	0.272315	0.254504	0.379281	0.304609	0.393818	0.280788	0.327834	0.453617	0.478609	0.44529	0.451656	0.214952	0.291279
	191297	0.25	0.8	2	0.58128	0.148795	0.294094	0.234444	0.417207	0.300196	0.450789	0.28744	0.351043	0.364219	0.350832	0.347651	0.395846	0.461363	0.4261
	191297	0.25	0.8	3	0.552371	0.154739	0.292358	0.242085	0.426651	0.308899	0.460449	0.293859	0.358758	0.377602	0.356264	0.356975	0.441926	0.373628	0.404917
	191297	0.25	0.8	4	0.517178	0.159962	0.287626	0.249182	0.425411	0.314278	0.45369	0.291025	0.354592	0.463215	0.473757	0.461953	0.415595	0.321516	0.362551
	191297	0.25	0.8	5	0.49581	0.161664	0.283116	0.247326	0.409112	0.308282	0.437418	0.286805	0.34645	0.468627	0.486741	0.463962	0.469891	0.311749	0.374822
	191297	0.25	0.8	6	0.479806	0.163491	0.280079	0.247075	0.401329	0.305854	0.429533	0.283494	0.341558	0.458788	0.486222	0.455964	0.41382	0.281333	0.334951
	191297	0.25	0.8	7	0.464806	0.164888	0.276841	0.246024	0.396337	0.303594	0.421732	0.281303	0.337492	0.462256	0.487445	0.459696	0.448642	0.285001	0.348571
	191297	0.25	0.8	8	0.459779	0.166049	0.276307	0.246703	0.394092	0.303447	0.418771	0.278995	0.334883	0.461555	0.482446	0.454057	0.444892	0.267216	0.333888
	191297	0.25	0.8	9	0.451651	0.167197	0.274799	0.248223	0.392837	0.304219	0.415341	0.279418	0.334084	0.465679	0.486617	0.4561	0.514707	0.302646	0.381167
	191297	0.3	0.6	1.2	0.592928	0.146177	0.294402	0.22646	0.386406	0.285561	0.428615	0.275767	0.335607	0.374083	0.359544	0.355915	0.364902	0.415884	0.388729
	191297	0.3	0.6	10	0.438746	0.17179	0.27454	0.240042	0.383236	0.29519	0.411531	0.269157	0.325455	0.452824	0.481086	0.446255	0.463672	0.244823	0.320447
	191297	0.3	0.6	11	0.436735	0.170748	0.273078	0.240599	0.382712	0.295455	0.408837	0.268776	0.324331	0.444901	0.474748	0.433611	0.468362	0.212658	0.292505
	191297	0.3	0.6	13	0.431792	0.170787	0.271559	0.243071	0.381116	0.296829	0.402308	0.269784	0.32298	0.457204	0.47812	0.441788	0.488808	0.225302	0.308438
	191297	0.3	0.6	15	0.432294	0.171339	0.272156	0.246316	0.37852	0.298432	0.402157	0.271623	0.324246	0.454562	0.478207	0.444098	0.455584	0.216663	0.293666
	191297	0.3	0.6	2	0.579688	0.153508	0.298307	0.233307	0.41629	0.299026	0.462051	0.286231	0.353485	0.376429	0.357829	0.357805	0.406738	0.391418	0.398931
	191297	0.3	0.6	3	0.546422	0.160421	0.296071	0.236596	0.419601	0.30258	0.471044	0.286191	0.356055	0.386871	0.365522	0.366705	0.455673	0.372055	0.40964
	191297	0.3	0.6	4	0.516591	0.165766	0.292632	0.243321	0.418852	0.307821	0.462285	0.28413	0.351947	0.452609	0.423601	0.426485	0.476581	0.324405	0.386037
	191297	0.3	0.6	5	0.480895	0.167622	0.283917	0.242685	0.407741	0.304271	0.442297	0.280862	0.34356	0.466365	0.486952	0.461393	0.449447	0.316266	0.371274
	191297	0.3	0.6	6	0.465728	0.168437	0.280082	0.239292	0.401278	0.299804	0.435938	0.273849	0.336386	0.466225	0.488619	0.462419	0.468118	0.293989	0.361161
	191297	0.3	0.6	7	0.45584	0.170996	0.279189	0.238087	0.39509	0.297123	0.427374	0.271908	0.33236	0.466146	0.485149	0.458468	0.484167	0.268783	0.34567
	191297	0.3	0.6	8	0.448886	0.171151	0.277178	0.237101	0.391343	0.295294	0.423335	0.269073	0.32902	0.464195	0.485272	0.454106	0.523619	0.267542	0.354138
	191297	0.3	0.6	9	0.44235	0.171022	0.275048	0.239616	0.388706	0.296473	0.418142	0.2702	0.328272	0.462278	0.482469	0.451498	0.495801	0.257005	0.338529
	191297	0.3	0.7	1.2	0.592676	0.146036	0.294197	0.230674	0.387232	0.289119	0.428845	0.280651	0.339271	0.373891	0.360823	0.357059	0.355301	0.432258	0.39002
	191297	0.3	0.7	10	0.443774	0.171203	0.275636	0.244522	0.386019	0.299394	0.41296	0.273843	0.329312	0.454397	0.478009	0.444622	0.466656	0.229802	0.307954
	191297	0.3	0.7	11	0.441763	0.17033	0.274309	0.244959	0.384264	0.299191	0.409608	0.27348	0.32798	0.443161	0.480497	0.437288	0.450828	0.255797	0.326398
	191297	0.3	0.7	13	0.438998	0.169966	0.273157	0.247788	0.383131	0.300943	0.403792	0.27509	0.327241	0.45754	0.477386	0.439835	0.536296	0.235344	0.327132
	191297	0.3	0.7	15	0.439417	0.170646	0.273834	0.25163	0.380582	0.302954	0.402833	0.277282	0.328469	0.4608	0.47582	0.444071	0.508342	0.219641	0.306745
	191297	0.3	0.7	2	0.580442	0.152842	0.297852	0.236754	0.417043	0.302041	0.461441	0.289832	0.356036	0.375453	0.35971	0.357135	0.407289	0.417894	0.412523
	191297	0.3	0.7	3	0.553461	0.159441	0.297059	0.239581	0.418854	0.304812	0.469039	0.290195	0.358553	0.384891	0.363308	0.364543	0.424414	0.346366	0.381439
	191297	0.3	0.7	4	0.522541	0.164898	0.29354	0.246172	0.419755	0.31034	0.46322	0.288511	0.355564	0.452089	0.425778	0.427131	0.471259	0.338616	0.394075
	191297	0.3	0.7	5	0.484917	0.16715	0.284699	0.245869	0.4087	0.307032	0.444144	0.285374	0.347482	0.467944	0.488724	0.464091	0.476381	0.320981	0.383538
	191297	0.3	0.7	6	0.470756	0.167649	0.28093	0.243689	0.403446	0.303848	0.437528	0.279085	0.340791	0.463946	0.490945	0.462635	0.458774	0.314687	0.37331
	191297	0.3	0.7	7	0.461874	0.168904	0.279307	0.241935	0.396951	0.300637	0.427629	0.275845	0.335362	0.464438	0.485863	0.457804	0.467482	0.272058	0.343949
	191297	0.3	0.7	8	0.454919	0.169811	0.277939	0.240899	0.392441	0.29854	0.42349	0.272992	0.331981	0.462649	0.484278	0.45508	0.494355	0.270368	0.349559
	191297	0.3	0.7	9	0.447545	0.170518	0.276251	0.243566	0.391581	0.300326	0.419372	0.274328	0.331686	0.459934	0.481665	0.451367	0.459253	0.251881	0.325331
	191297	0.3	0.8	1.2	0.591084	0.141347	0.289046	0.234177	0.384699	0.291133	0.421014	0.285392	0.340184	0.378192	0.362231	0.358146	0.429008	0.437881	0.433399
	191297	0.3	0.8	10	0.461706	0.164219	0.275356	0.249592	0.383114	0.302265	0.408178	0.281424	0.333152	0.45373	0.486971	0.450577	0.464825	0.284206	0.352739
	191297	0.3	0.8	11	0.458438	0.163175	0.273506	0.249264	0.380294	0.301143	0.404387	0.27974	0.330708	0.440383	0.481321	0.434794	0.454832	0.249955	0.322615
	191297	0.3	0.8	13	0.456343	0.16296	0.272701	0.252305	0.379279	0.303029	0.399185	0.280659	0.32959	0.445934	0.476712	0.436642	0.435841	0.240196	0.309709
	191297	0.3	0.8	15	0.457433	0.163578	0.273543	0.255937	0.376622	0.304767	0.396815	0.282892	0.330307	0.455083	0.478045	0.445185	0.47286	0.233494	0.312619
	191297	0.3	0.8	2	0.579772	0.14666	0.291598	0.23973	0.411136	0.302863	0.448879	0.29341	0.354864	0.375138	0.357791	0.355962	0.40217	0.381106	0.391355
	191297	0.3	0.8	3	0.55455	0.152843	0.291134	0.241673	0.41306	0.304935	0.455277	0.293714	0.35707	0.385571	0.36905	0.367041	0.438249	0.418285	0.428035
	191297	0.3	0.8	4	0.529579	0.157209	0.288539	0.25036	0.414715	0.31223	0.44964	0.294054	0.355572	0.446829	0.425629	0.422556	0.395432	0.36026	0.377027
	191297	0.3	0.8	5	0.50243	0.159992	0.283522	0.248323	0.404742	0.3078	0.433956	0.289122	0.347034	0.465029	0.492455	0.465665	0.42162	0.36198	0.389531
	191297	0.3	0.8	6	0.486677	0.160181	0.279207	0.246702	0.400216	0.305245	0.428914	0.283372	0.341274	0.466099	0.489809	0.463414	0.468151	0.320461	0.380476
	191297	0.3	0.8	7	0.477878	0.161392	0.277715	0.245293	0.392395	0.301877	0.42051	0.281037	0.336909	0.459713	0.485393	0.456667	0.423738	0.289295	0.343842
	191297	0.3	0.8	8	0.470756	0.16259	0.276659	0.244654	0.388302	0.300178	0.41637	0.27894	0.334073	0.459063	0.482781	0.453598	0.441564	0.265059	0.331267
	191297	0.3	0.8	9	0.46422	0.163527	0.275522	0.24878	0.387129	0.302905	0.413877	0.282073	0.335494	0.454166	0.481205	0.450315	0.420595	0.253697	0.316491
	191297	0.35	0.6	1.2	0.581532	0.150034	0.29538	0.226438	0.402171	0.289741	0.448907	0.27734	0.342858	0.365729	0.344334	0.344452	0.421147	0.374505	0.396459
	191297	0.35	0.6	10	0.440841	0.172148	0.275482	0.244594	0.393577	0.301695	0.418576	0.275394	0.332214	0.455075	0.478964	0.442659	0.512891	0.237118	0.324305
	191297	0.35	0.6	11	0.438076	0.172992	0.275289	0.245325	0.392532	0.301942	0.417183	0.275881	0.332128	0.45244	0.47734	0.439487	0.506987	0.237133	0.323129
	191297	0.35	0.6	13	0.434976	0.172995	0.274315	0.247108	0.389037	0.302239	0.41251	0.276747	0.331258	0.455137	0.474327	0.437937	0.485328	0.207955	0.291155
	191297	0.35	0.6	15	0.432127	0.173425	0.273755	0.245681	0.385092	0.29998	0.409255	0.274739	0.32877	0.457797	0.483062	0.449211	0.495674	0.249025	0.331504
	191297	0.35	0.6	2	0.571644	0.155262	0.297917	0.231679	0.41961	0.29853	0.469283	0.285237	0.354813	0.364395	0.347011	0.346563	0.401735	0.381909	0.391571
	191297	0.35	0.6	3	0.55212	0.160114	0.297325	0.235993	0.428056	0.30425	0.47676	0.288258	0.359285	0.373633	0.35884	0.356091	0.406072	0.408913	0.407487
	191297	0.35	0.6	4	0.514915	0.166316	0.292641	0.244329	0.427437	0.310927	0.464249	0.288089	0.355545	0.46905	0.493752	0.46732	0.477897	0.367379	0.415413
	191297	0.35	0.6	5	0.489274	0.167304	0.286108	0.244522	0.41617	0.308049	0.45179	0.283034	0.348034	0.467049	0.487288	0.463812	0.449332	0.29675	0.357439
	191297	0.35	0.6	6	0.474108	0.167883	0.282125	0.242976	0.408079	0.304593	0.439564	0.277835	0.34047	0.464945	0.485149	0.458406	0.470217	0.277694	0.349177
	191297	0.35	0.6	7	0.458857	0.169117	0.278568	0.242135	0.403461	0.302641	0.432823	0.276035	0.33709	0.464701	0.485611	0.457675	0.469991	0.267706	0.341114
	191297	0.35	0.6	8	0.451735	0.169309	0.276555	0.242307	0.400504	0.301939	0.430745	0.275671	0.336187	0.462554	0.480364	0.451825	0.492836	0.240607	0.323351
	191297	0.35	0.6	9	0.443188	0.171183	0.275438	0.242669	0.395143	0.300681	0.424393	0.274364	0.333272	0.4583	0.480241	0.449784	0.481128	0.238809	0.319188
	191297	0.35	0.7	1.2	0.580861	0.149943	0.29512	0.22935	0.402118	0.2921	0.447269	0.280966	0.345129	0.363832	0.347183	0.346176	0.4002	0.394199	0.397177
	191297	0.35	0.7	10	0.451567	0.169254	0.276459	0.248192	0.39389	0.304511	0.417416	0.280714	0.335681	0.460417	0.481663	0.448359	0.504073	0.252316	0.336297
	191297	0.35	0.7	11	0.448886	0.169884	0.27615	0.248839	0.393821	0.304976	0.416581	0.281014	0.335625	0.452855	0.476849	0.439106	0.507241	0.227157	0.31379
	191297	0.35	0.7	13	0.441512	0.169909	0.273892	0.250659	0.390139	0.305219	0.410947	0.28004	0.333093	0.450498	0.47587	0.439335	0.472039	0.220196	0.300306
	191297	0.35	0.7	15	0.438411	0.169881	0.272906	0.249608	0.385852	0.303124	0.408064	0.278498	0.331056	0.453678	0.475147	0.439299	0.484733	0.219252	0.301935
	191297	0.35	0.7	2	0.571476	0.153907	0.296571	0.234298	0.418062	0.300298	0.465725	0.288323	0.356155	0.366178	0.349886	0.348181	0.438997	0.426417	0.432616
	191297	0.35	0.7	3	0.552958	0.158418	0.29597	0.238909	0.425712	0.306058	0.471426	0.291638	0.360352	0.376937	0.356226	0.356085	0.4836	0.383369	0.427691
	191297	0.35	0.7	4	0.516675	0.164292	0.291351	0.247103	0.425629	0.312678	0.459359	0.292129	0.357137	0.465085	0.487778	0.46291	0.416256	0.321125	0.362554
	191297	0.35	0.7	5	0.493632	0.164518	0.284976	0.24629	0.41427	0.308921	0.448987	0.286049	0.349459	0.47029	0.486427	0.464599	0.486802	0.296599	0.368611
	191297	0.35	0.7	6	0.478968	0.164947	0.281077	0.246349	0.407834	0.307161	0.438439	0.281651	0.342976	0.466507	0.491944	0.463881	0.475903	0.319393	0.382248
	191297	0.35	0.7	7	0.469499	0.165666	0.27889	0.244931	0.403148	0.304727	0.431314	0.280418	0.33987	0.461614	0.482779	0.456152	0.454903	0.266083	0.335768
	191297	0.35	0.7	8	0.464974	0.166078	0.277888	0.245755	0.39843	0.304	0.428609	0.281099	0.339525	0.460993	0.488593	0.456019	0.488199	0.290494	0.364248
	191297	0.35	0.7	9	0.456846	0.168042	0.277072	0.246324	0.394275	0.303214	0.422492	0.280029	0.336816	0.461025	0.480328	0.450341	0.485273	0.242601	0.323484
	191297	0.35	0.8	1.2	0.579269	0.145673	0.290489	0.231667	0.403419	0.294319	0.44489	0.283641	0.346421	0.369441	0.347502	0.348801	0.463197	0.404363	0.431785
	191297	0.35	0.8	10	0.457097	0.16536	0.274928	0.253865	0.392823	0.308415	0.416766	0.287037	0.339946	0.453962	0.47765	0.443227	0.483375	0.238438	0.319349
	191297	0.35	0.8	11	0.454835	0.166271	0.275001	0.254178	0.392454	0.308532	0.416847	0.287328	0.340176	0.445597	0.485328	0.440897	0.447708	0.266959	0.334477
	191297	0.35	0.8	13	0.44612	0.166851	0.272829	0.255845	0.388038	0.308371	0.409271	0.285931	0.33666	0.449086	0.483207	0.443313	0.462668	0.280092	0.348941
	191297	0.35	0.8	15	0.442014	0.166657	0.271413	0.255115	0.383679	0.30646	0.405322	0.284175	0.334105	0.453048	0.481479	0.442626	0.463735	0.26488	0.337172
	191297	0.35	0.8	2	0.569968	0.14894	0.291361	0.236017	0.416253	0.301233	0.460427	0.289998	0.355859	0.364637	0.349424	0.347182	0.402131	0.431003	0.416067
	191297	0.35	0.8	3	0.553712	0.1539	0.291918	0.241934	0.425778	0.308546	0.466542	0.294488	0.361066	0.374455	0.357362	0.35441	0.417261	0.407436	0.41229
	191297	0.35	0.8	4	0.522289	0.159226	0.288378	0.249552	0.425806	0.31468	0.454695	0.295053	0.357878	0.465202	0.48512	0.462098	0.428484	0.299939	0.35287
	191297	0.35	0.8	5	0.498073	0.159828	0.282145	0.249188	0.414469	0.311247	0.446154	0.290026	0.351534	0.467398	0.493083	0.46481	0.456447	0.354176	0.39886
	191297	0.35	0.8	6	0.483409	0.160345	0.27841	0.250389	0.408391	0.310442	0.43773	0.28691	0.346625	0.464668	0.483476	0.457345	0.460062	0.273785	0.343282
	191297	0.35	0.8	7	0.474359	0.161563	0.276837	0.24964	0.403512	0.308451	0.430904	0.286145	0.343912	0.464468	0.487734	0.459817	0.476366	0.305762	0.372457
	191297	0.35	0.8	8	0.469666	0.162734	0.276461	0.251146	0.399231	0.30833	0.428097	0.287388	0.343906	0.463386	0.484995	0.456927	0.491583	0.277984	0.355141
	191297	0.35	0.8	9	0.462963	0.163538	0.275158	0.252229	0.394535	0.307727	0.42227	0.28683	0.341615	0.458264	0.482346	0.451443	0.472204	0.260652	0.335894
	191297	0.4	0.6	1.2	0.567957	0.157938	0.299503	0.219802	0.411418	0.286526	0.46477	0.275568	0.345993	0.378062	0.355415	0.356051	0.446839	0.377692	0.409366
	191297	0.4	0.6	10	0.432127	0.177087	0.27663	0.238315	0.397867	0.298084	0.423839	0.272765	0.33192	0.452839	0.481632	0.447103	0.469318	0.253393	0.329099
	191297	0.4	0.6	11	0.426931	0.178818	0.276303	0.235867	0.394211	0.295142	0.419007	0.270329	0.328634	0.451966	0.477712	0.43978	0.49782	0.241257	0.325007
	191297	0.4	0.6	13	0.42115	0.179125	0.27466	0.235818	0.391415	0.294317	0.414651	0.268963	0.326283	0.45584	0.478249	0.437438	0.511296	0.225791	0.31325
	191297	0.4	0.6	15	0.418887	0.179323	0.274073	0.235865	0.386755	0.293026	0.412016	0.268274	0.324959	0.45933	0.477186	0.44208	0.512808	0.21889	0.306816
	191297	0.4	0.6	2	0.558907	0.160828	0.299813	0.225087	0.419899	0.293072	0.47692	0.282837	0.355089	0.375941	0.362146	0.35889	0.415504	0.440442	0.42761
	191297	0.4	0.6	3	0.54793	0.163014	0.298865	0.230763	0.427668	0.299773	0.486928	0.288384	0.362234	0.390663	0.369825	0.370457	0.464618	0.396797	0.428038
	191297	0.4	0.6	4	0.49757	0.167829	0.288975	0.235396	0.423806	0.302676	0.463563	0.28275	0.351253	0.468221	0.488996	0.464537	0.477155	0.326749	0.387882
	191297	0.4	0.6	5	0.476621	0.170946	0.285441	0.237746	0.414837	0.302263	0.455294	0.282159	0.348402	0.468683	0.48958	0.46522	0.477296	0.319577	0.382829
	191297	0.4	0.6	6	0.458354	0.172982	0.28158	0.235523	0.408952	0.298903	0.44467	0.275935	0.340548	0.462251	0.488315	0.460027	0.452935	0.302583	0.362799
	191297	0.4	0.6	7	0.449975	0.174293	0.280049	0.235726	0.403702	0.297651	0.43818	0.27372	0.336954	0.463059	0.489226	0.459715	0.4811	0.300308	0.369789
	191297	0.4	0.6	8	0.445282	0.175286	0.279377	0.236181	0.400777	0.297213	0.435444	0.274248	0.336539	0.469305	0.480781	0.452989	0.529993	0.258257	0.347287
	191297	0.4	0.6	9	0.435395	0.1761	0.276899	0.235584	0.39731	0.295784	0.428076	0.273126	0.333481	0.462549	0.483837	0.45422	0.509754	0.256771	0.341516
	191297	0.4	0.7	1.2	0.565276	0.155355	0.296341	0.224509	0.410806	0.290343	0.460316	0.28068	0.348724	0.377549	0.360474	0.35908	0.428549	0.430195	0.429371
	191297	0.4	0.7	10	0.441093	0.171604	0.275124	0.241152	0.394138	0.299225	0.4209	0.276612	0.333832	0.455142	0.479229	0.444171	0.516051	0.236883	0.324713
	191297	0.4	0.7	11	0.437322	0.173103	0.27514	0.23901	0.39057	0.296547	0.416752	0.274416	0.330928	0.45619	0.485111	0.443336	0.509524	0.276117	0.358149
	191297	0.4	0.7	13	0.432043	0.173751	0.273985	0.240081	0.389106	0.296945	0.414097	0.273862	0.329686	0.4516	0.479627	0.442591	0.495884	0.245663	0.328558
	191297	0.4	0.7	15	0.431289	0.173465	0.27352	0.240481	0.385555	0.296209	0.411563	0.273221	0.328418	0.453604	0.477705	0.442596	0.495736	0.223475	0.308072
	191297	0.4	0.7	2	0.557399	0.15788	0.296652	0.228208	0.419419	0.295586	0.47184	0.28606	0.356181	0.376445	0.357413	0.356069	0.43831	0.40164	0.419174
	191297	0.4	0.7	3	0.546003	0.158915	0.294564	0.232228	0.423997	0.300092	0.477727	0.289823	0.360775	0.390482	0.371648	0.370374	0.48062	0.411636	0.443461
	191297	0.4	0.7	4	0.5031	0.162656	0.286063	0.237077	0.421623	0.303498	0.458377	0.284302	0.350939	0.466632	0.48849	0.464239	0.438389	0.335397	0.380039
	191297	0.4	0.7	5	0.485336	0.16615	0.283969	0.239944	0.412213	0.303326	0.44945	0.285195	0.34896	0.471819	0.490736	0.465301	0.520848	0.326034	0.401034
	191297	0.4	0.7	6	0.469834	0.167495	0.280526	0.238207	0.405434	0.300097	0.439223	0.279049	0.341277	0.464941	0.488548	0.462135	0.471145	0.313069	0.376175
	191297	0.4	0.7	7	0.461622	0.168954	0.279272	0.238531	0.40029	0.298931	0.433453	0.277156	0.338116	0.464548	0.485704	0.458299	0.487866	0.279028	0.355012
	191297	0.4	0.7	8	0.456846	0.170229	0.27887	0.239147	0.398949	0.299038	0.433394	0.277775	0.338559	0.461738	0.485086	0.455957	0.490076	0.28341	0.359134
	191297	0.4	0.7	9	0.443942	0.17062	0.275219	0.238668	0.395885	0.297801	0.426907	0.277075	0.336046	0.459027	0.482154	0.451671	0.458536	0.2552	0.327904
	191297	0.4	0.8	1.2	0.564438	0.154863	0.295653	0.226914	0.411699	0.292572	0.457196	0.283894	0.350282	0.375203	0.359102	0.357667	0.376693	0.397755	0.386938
	191297	0.4	0.8	10	0.447545	0.17065	0.276357	0.244683	0.393314	0.301685	0.420512	0.281126	0.336974	0.457529	0.476396	0.442046	0.51442	0.21877	0.306986
	191297	0.4	0.8	11	0.444696	0.171766	0.276376	0.242773	0.387523	0.298527	0.414334	0.27928	0.333659	0.452069	0.47753	0.439757	0.495768	0.237569	0.321214
	191297	0.4	0.8	13	0.438663	0.172236	0.27487	0.243161	0.385457	0.298203	0.410879	0.277947	0.331586	0.463662	0.473377	0.437617	0.576257	0.216161	0.314391
	191297	0.4	0.8	15	0.437573	0.171892	0.274254	0.243833	0.382432	0.297795	0.409113	0.277843	0.330936	0.454391	0.477848	0.442514	0.503716	0.233624	0.319201
	191297	0.4	0.8	2	0.556561	0.156683	0.295302	0.230399	0.419681	0.297484	0.466426	0.288912	0.35681	0.374612	0.360602	0.356231	0.402804	0.418449	0.410477
	191297	0.4	0.8	3	0.546506	0.158159	0.293998	0.233949	0.426305	0.302107	0.472852	0.291912	0.360977	0.390393	0.370375	0.370292	0.482794	0.419315	0.448821
	191297	0.4	0.8	4	0.508296	0.161661	0.286656	0.238696	0.422937	0.305164	0.459191	0.287726	0.353778	0.464304	0.488739	0.464006	0.413504	0.342042	0.374394
	191297	0.4	0.8	5	0.491872	0.164334	0.284308	0.240575	0.415256	0.304652	0.451798	0.287794	0.351612	0.464245	0.491973	0.464393	0.42722	0.347274	0.383121
	191297	0.4	0.8	6	0.47813	0.165499	0.281301	0.240353	0.406252	0.30202	0.439434	0.282754	0.344098	0.46596	0.49026	0.460745	0.470145	0.358577	0.406851
	191297	0.4	0.8	7	0.470169	0.166965	0.280182	0.240812	0.402573	0.301358	0.433698	0.281227	0.341204	0.461432	0.485833	0.457603	0.466299	0.28078	0.350505
	191297	0.4	0.8	8	0.464723	0.168088	0.27949	0.241204	0.399944	0.300923	0.432915	0.281251	0.340979	0.470377	0.487943	0.460176	0.53384	0.299266	0.383529
	191297	0.4	0.8	9	0.451316	0.169706	0.276751	0.242649	0.396515	0.301062	0.427433	0.282313	0.340037	0.461271	0.480398	0.450209	0.487622	0.243285	0.324614
	203253	0.2	0.6	1.2	0.604324	0.143949	0.294944	0.209078	0.375697	0.26865	0.402188	0.257274	0.313809	0.323284	0.30889	0.306335	0.34491	0.399803	0.370333
	203253	0.2	0.6	10	0.445785	0.17615	0.280224	0.245821	0.378234	0.29798	0.397132	0.273126	0.323658	0.449216	0.476122	0.439008	0.452312	0.218615	0.294763
	203253	0.2	0.6	11	0.444696	0.17569	0.279515	0.246691	0.37506	0.297624	0.392903	0.273421	0.322449	0.456192	0.489203	0.453118	0.440992	0.280097	0.342594
	203253	0.2	0.6	13	0.442936	0.175802	0.27905	0.247983	0.372763	0.297831	0.388851	0.274018	0.321488	0.460088	0.484866	0.45446	0.440173	0.264441	0.330393
	203253	0.2	0.6	15	0.442769	0.174326	0.277824	0.246275	0.366464	0.294582	0.381691	0.27058	0.316672	0.462936	0.481256	0.455264	0.424892	0.227291	0.296156
	203253	0.2	0.6	2	0.582118	0.154906	0.300289	0.224141	0.42335	0.293101	0.451579	0.275549	0.342256	0.324869	0.312223	0.309737	0.386931	0.424562	0.404874
	203253	0.2	0.6	3	0.540808	0.164163	0.29796	0.236129	0.432434	0.305461	0.458862	0.28302	0.350102	0.437056	0.420897	0.416943	0.40767	0.42042	0.413947
	203253	0.2	0.6	4	0.496062	0.170759	0.291045	0.242919	0.421163	0.30812	0.444043	0.280806	0.344044	0.472635	0.49123	0.467807	0.477148	0.330572	0.390561
	203253	0.2	0.6	5	0.481481	0.173038	0.288643	0.240574	0.403895	0.30154	0.431899	0.273627	0.33501	0.46982	0.488101	0.464533	0.483041	0.312852	0.37975
	203253	0.2	0.6	6	0.462879	0.173037	0.283011	0.239516	0.393408	0.297753	0.416453	0.269763	0.327429	0.467663	0.486561	0.460884	0.484244	0.274854	0.35067
	203253	0.2	0.6	7	0.4545	0.175923	0.282767	0.241098	0.386429	0.296935	0.409571	0.270032	0.325476	0.464636	0.482832	0.456114	0.450505	0.250057	0.321605
	203253	0.2	0.6	8	0.449472	0.175951	0.281221	0.242081	0.381599	0.296235	0.401724	0.269274	0.322427	0.460354	0.482885	0.454014	0.440015	0.253151	0.321396
	203253	0.2	0.6	9	0.446288	0.176012	0.280271	0.245484	0.379818	0.298221	0.397581	0.272351	0.323262	0.454559	0.481632	0.445836	0.465526	0.245929	0.321837
	203253	0.2	0.7	1.2	0.603821	0.141253	0.292048	0.213796	0.378749	0.273312	0.400972	0.262032	0.316944	0.323796	0.311169	0.308241	0.347842	0.433621	0.386024
	203253	0.2	0.7	10	0.449053	0.171008	0.277113	0.251693	0.376176	0.301595	0.39531	0.27804	0.326463	0.453268	0.47976	0.442067	0.44633	0.233568	0.306659
	203253	0.2	0.7	11	0.447712	0.170506	0.276293	0.251759	0.373816	0.30088	0.391609	0.277559	0.324865	0.45539	0.478937	0.446365	0.448322	0.225109	0.299723
	203253	0.2	0.7	13	0.445282	0.171318	0.276197	0.252248	0.3715	0.300474	0.386739	0.27737	0.323049	0.457448	0.480551	0.452775	0.387214	0.218043	0.278987
	203253	0.2	0.7	15	0.444528	0.169588	0.274566	0.250626	0.366416	0.297657	0.381017	0.274403	0.319039	0.472854	0.481402	0.455931	0.497289	0.219716	0.304775
	203253	0.2	0.7	2	0.583208	0.150565	0.296328	0.227409	0.418456	0.294676	0.444884	0.278381	0.342467	0.325908	0.313454	0.311137	0.416888	0.455944	0.435542
	203253	0.2	0.7	3	0.544579	0.158524	0.293818	0.239458	0.424933	0.306307	0.449585	0.285958	0.349571	0.439714	0.41864	0.417872	0.438465	0.394011	0.415052
	203253	0.2	0.7	4	0.500838	0.165616	0.288005	0.246633	0.419543	0.310648	0.440246	0.285302	0.34623	0.465539	0.488854	0.462663	0.436803	0.321232	0.370207
	203253	0.2	0.7	5	0.48609	0.16844	0.286141	0.244791	0.403294	0.30466	0.42862	0.277673	0.337017	0.467484	0.487186	0.462073	0.447343	0.282143	0.346037
	203253	0.2	0.7	6	0.466399	0.17001	0.281589	0.244535	0.393518	0.301633	0.415133	0.27408	0.330172	0.461523	0.485097	0.458301	0.426968	0.257942	0.321599
	203253	0.2	0.7	7	0.458103	0.172149	0.280823	0.246158	0.385279	0.300393	0.406466	0.274356	0.327593	0.46271	0.483571	0.456811	0.416449	0.256722	0.317636
	203253	0.2	0.7	8	0.453662	0.171397	0.278848	0.24699	0.378933	0.299055	0.398277	0.273547	0.324333	0.45643	0.48397	0.452719	0.421456	0.25277	0.316011
	203253	0.2	0.7	9	0.447629	0.171301	0.27691	0.248473	0.377057	0.29955	0.394548	0.275101	0.324171	0.456494	0.47976	0.446111	0.463559	0.234115	0.311108
	203253	0.2	0.8	1.2	0.603486	0.135748	0.286221	0.217237	0.381179	0.276751	0.399993	0.266164	0.319635	0.326155	0.307861	0.307912	0.382284	0.369944	0.376013
	203253	0.2	0.8	10	0.453913	0.166568	0.274968	0.257002	0.377239	0.305723	0.394551	0.283114	0.32967	0.445592	0.479313	0.438768	0.391893	0.244076	0.300806
	203253	0.2	0.8	11	0.452154	0.165962	0.273934	0.256498	0.375956	0.304945	0.392137	0.282175	0.32819	0.464374	0.484099	0.452917	0.482828	0.257084	0.335519
	203253	0.2	0.8	13	0.448634	0.167214	0.273894	0.256681	0.373341	0.304211	0.386894	0.281532	0.325909	0.459853	0.481454	0.453748	0.417341	0.214995	0.283793
	203253	0.2	0.8	15	0.448802	0.164652	0.271838	0.255922	0.368602	0.302097	0.382073	0.279958	0.32314	0.467722	0.481178	0.455591	0.446011	0.222093	0.296529
	203253	0.2	0.8	2	0.584967	0.144227	0.290462	0.230645	0.418513	0.297394	0.443616	0.282	0.34481	0.324944	0.311501	0.309617	0.378178	0.42919	0.402072
	203253	0.2	0.8	3	0.546254	0.152307	0.288441	0.242777	0.426025	0.309296	0.446215	0.289443	0.351125	0.435369	0.417179	0.413572	0.389299	0.396366	0.3928
	203253	0.2	0.8	4	0.505447	0.158979	0.28347	0.2495	0.420193	0.313094	0.437413	0.288247	0.347499	0.463901	0.490293	0.463072	0.436672	0.339597	0.382065
	203253	0.2	0.8	5	0.492626	0.162552	0.282979	0.24734	0.401494	0.306105	0.424601	0.280984	0.338176	0.465769	0.487954	0.463359	0.441263	0.311252	0.365027
	203253	0.2	0.8	6	0.47218	0.163933	0.278219	0.248832	0.392834	0.304675	0.412607	0.278501	0.332543	0.464714	0.483848	0.45838	0.450008	0.250371	0.321737
	203253	0.2	0.8	7	0.46355	0.166542	0.27785	0.249982	0.383191	0.302574	0.402512	0.278323	0.329091	0.464359	0.483194	0.456753	0.469832	0.249703	0.326095
	203253	0.2	0.8	8	0.458941	0.166176	0.276161	0.251402	0.380881	0.302884	0.398357	0.278274	0.327659	0.462024	0.483911	0.455	0.468731	0.255706	0.330898
	203253	0.2	0.8	9	0.453327	0.166182	0.274472	0.253352	0.377314	0.30315	0.394252	0.280086	0.327505	0.452203	0.480275	0.446091	0.440454	0.240021	0.310719
	203253	0.25	0.6	1.2	0.595525	0.146827	0.295702	0.214425	0.383255	0.274995	0.420512	0.264648	0.324852	0.362314	0.348086	0.345464	0.361101	0.424569	0.390271
	203253	0.25	0.6	10	0.436484	0.176117	0.277259	0.241745	0.389995	0.298475	0.414023	0.270932	0.327531	0.454779	0.476961	0.441669	0.465098	0.230038	0.307825
	203253	0.25	0.6	11	0.433467	0.175882	0.276115	0.242131	0.387856	0.298139	0.410508	0.271054	0.326514	0.449528	0.475989	0.436413	0.49561	0.234903	0.318736
	203253	0.25	0.6	13	0.429194	0.17621	0.275006	0.242579	0.385094	0.297657	0.407109	0.270934	0.325347	0.459869	0.47672	0.44218	0.52785	0.232593	0.322901
	203253	0.25	0.6	15	0.430199	0.175057	0.274425	0.245046	0.381558	0.298432	0.402022	0.271537	0.32414	0.456284	0.477831	0.444926	0.470031	0.217711	0.297585
	203253	0.25	0.6	2	0.578515	0.156665	0.301054	0.228432	0.423284	0.29673	0.463482	0.282042	0.350683	0.362079	0.348435	0.345241	0.375479	0.40962	0.391807
	203253	0.25	0.6	3	0.536869	0.16547	0.298053	0.234312	0.433642	0.304235	0.47575	0.284118	0.35577	0.378807	0.359123	0.357789	0.460813	0.390963	0.423024
	203253	0.25	0.6	4	0.500587	0.170917	0.292504	0.241032	0.429426	0.30876	0.465882	0.282894	0.352029	0.463133	0.490407	0.461622	0.397489	0.337484	0.365037
	203253	0.25	0.6	5	0.481481	0.17327	0.288836	0.238376	0.41545	0.302935	0.450127	0.276498	0.342568	0.468129	0.493339	0.466585	0.484765	0.342122	0.40114
	203253	0.25	0.6	6	0.470085	0.172938	0.285124	0.238039	0.402704	0.299213	0.434155	0.272905	0.335143	0.468154	0.485361	0.459906	0.483984	0.283957	0.35792
	203253	0.25	0.6	7	0.459611	0.175232	0.283793	0.237477	0.39988	0.297988	0.428073	0.271561	0.33231	0.4646	0.484305	0.458143	0.480501	0.277679	0.351961
	203253	0.25	0.6	8	0.451316	0.176839	0.282507	0.237198	0.395744	0.296614	0.42183	0.268352	0.328026	0.463688	0.482135	0.453089	0.486617	0.24966	0.330008
	203253	0.25	0.6	9	0.436652	0.176737	0.277799	0.238639	0.392402	0.296787	0.415764	0.269481	0.327008	0.453148	0.478214	0.44315	0.452769	0.219924	0.296048
	203253	0.25	0.7	1.2	0.595106	0.145011	0.293763	0.221408	0.386861	0.281633	0.422727	0.271907	0.330944	0.363601	0.347669	0.346238	0.368297	0.416591	0.390958
	203253	0.25	0.7	10	0.442685	0.172217	0.276112	0.24377	0.389882	0.29998	0.415189	0.274658	0.330609	0.447967	0.481439	0.442534	0.431467	0.25306	0.319014
	203253	0.25	0.7	11	0.439082	0.172587	0.275281	0.243222	0.386987	0.298706	0.410321	0.273774	0.32842	0.451002	0.480796	0.441594	0.475699	0.252596	0.329975
	203253	0.25	0.7	13	0.434138	0.173015	0.274066	0.246949	0.38561	0.301082	0.407457	0.27596	0.329058	0.45397	0.477367	0.442583	0.463885	0.21684	0.295534
	203253	0.25	0.7	15	0.434557	0.172182	0.273538	0.249087	0.382043	0.301561	0.402467	0.276034	0.32747	0.455555	0.479525	0.445457	0.452776	0.214141	0.290765
	203253	0.25	0.7	2	0.57994	0.153721	0.298578	0.231234	0.420568	0.298402	0.459513	0.284681	0.35156	0.363116	0.346892	0.345406	0.38644	0.39866	0.392455
	203253	0.25	0.7	3	0.548265	0.160556	0.296694	0.237814	0.432048	0.306771	0.47135	0.288569	0.357977	0.376735	0.360041	0.357804	0.433913	0.398945	0.415695
	203253	0.25	0.7	4	0.507123	0.166575	0.290644	0.243834	0.430233	0.311261	0.466115	0.287997	0.356021	0.470916	0.488372	0.464667	0.511412	0.331172	0.402014
	203253	0.25	0.7	5	0.484666	0.169176	0.286345	0.242354	0.415944	0.306262	0.449923	0.280905	0.34587	0.469472	0.487168	0.463649	0.476293	0.303841	0.371007
	203253	0.25	0.7	6	0.47394	0.169374	0.283325	0.241506	0.40407	0.30232	0.435303	0.276503	0.338189	0.467393	0.485717	0.460612	0.479895	0.276869	0.351148
	203253	0.25	0.7	7	0.463885	0.170874	0.281542	0.242123	0.401378	0.302044	0.427382	0.275055	0.334702	0.469343	0.485117	0.459853	0.504811	0.277244	0.357918
	203253	0.25	0.7	8	0.458187	0.172582	0.281202	0.241467	0.397615	0.300465	0.423386	0.273004	0.331958	0.461293	0.483301	0.453881	0.4708	0.257348	0.332788
	203253	0.25	0.7	9	0.445701	0.172757	0.277485	0.243547	0.394279	0.301102	0.417314	0.274699	0.331311	0.456087	0.4789	0.445833	0.478292	0.232848	0.313213
	203253	0.25	0.8	1.2	0.594687	0.142603	0.291212	0.224205	0.387287	0.283999	0.417299	0.274768	0.331357	0.361316	0.349457	0.344694	0.330899	0.432374	0.374891
	203253	0.25	0.8	10	0.451986	0.170295	0.277437	0.248279	0.39127	0.303789	0.413275	0.279167	0.333234	0.453468	0.479154	0.443596	0.458085	0.24576	0.319897
	203253	0.25	0.8	11	0.444109	0.171517	0.275993	0.248131	0.389661	0.303193	0.410171	0.279186	0.332234	0.445573	0.477848	0.437408	0.460931	0.233714	0.310161
	203253	0.25	0.8	13	0.437573	0.17219	0.274492	0.251306	0.385926	0.304396	0.405455	0.280523	0.331613	0.459228	0.477865	0.443527	0.49633	0.219453	0.304341
	203253	0.25	0.8	15	0.438076	0.170765	0.273511	0.253538	0.381733	0.3047	0.400297	0.280626	0.329946	0.453685	0.477061	0.44432	0.436662	0.207245	0.281084
	203253	0.25	0.8	2	0.579856	0.150424	0.295338	0.233743	0.418622	0.299985	0.451067	0.287289	0.351014	0.361307	0.34688	0.343789	0.369786	0.390105	0.379674
	203253	0.25	0.8	3	0.548684	0.157026	0.293527	0.238302	0.428217	0.306203	0.460036	0.28965	0.355481	0.376388	0.359986	0.358223	0.418865	0.406164	0.412416
	203253	0.25	0.8	4	0.510558	0.162449	0.287992	0.246937	0.429332	0.313538	0.456571	0.291018	0.355464	0.460667	0.488847	0.45981	0.398189	0.327245	0.359248
	203253	0.25	0.8	5	0.489107	0.165556	0.28456	0.244653	0.411974	0.306996	0.439952	0.283952	0.345143	0.467117	0.490047	0.464728	0.457571	0.315184	0.373259
	203253	0.25	0.8	6	0.475951	0.16662	0.281608	0.243202	0.399329	0.302297	0.425232	0.278671	0.336694	0.465476	0.488718	0.460843	0.462209	0.297481	0.361986
	203253	0.25	0.8	7	0.468074	0.167918	0.280353	0.244574	0.396915	0.302656	0.418698	0.277915	0.334081	0.467023	0.489016	0.462082	0.479247	0.301222	0.369931
	203253	0.25	0.8	8	0.463131	0.169573	0.28024	0.243743	0.395444	0.301591	0.417739	0.276122	0.332479	0.459436	0.48317	0.453076	0.456832	0.268092	0.337892
	203253	0.25	0.8	9	0.453997	0.17013	0.277918	0.246817	0.394872	0.303764	0.414143	0.278539	0.333067	0.448941	0.479485	0.444564	0.406957	0.240398	0.302251
	203253	0.3	0.6	1.2	0.593347	0.147027	0.295361	0.22343	0.393314	0.284974	0.437728	0.274807	0.337642	0.375566	0.358205	0.357578	0.370636	0.398236	0.38394
	203253	0.3	0.6	10	0.441679	0.171704	0.275387	0.242121	0.391671	0.299252	0.424483	0.272473	0.331901	0.45553	0.478574	0.443938	0.509896	0.241159	0.327449
	203253	0.3	0.6	11	0.436903	0.171728	0.273913	0.242137	0.389408	0.298601	0.420363	0.271442	0.329874	0.447672	0.479192	0.438706	0.475367	0.247316	0.325359
	203253	0.3	0.6	13	0.431875	0.172282	0.272772	0.244018	0.385745	0.298934	0.413909	0.272469	0.328616	0.454948	0.475911	0.43952	0.48811	0.220407	0.303684
	203253	0.3	0.6	15	0.431624	0.173054	0.273303	0.243438	0.382376	0.297484	0.411859	0.27142	0.327207	0.459938	0.482407	0.448841	0.498291	0.243406	0.327053
	203253	0.3	0.6	2	0.583375	0.153502	0.299248	0.232973	0.42499	0.300963	0.471283	0.286646	0.356475	0.376648	0.358053	0.357961	0.420675	0.404228	0.412288
	203253	0.3	0.6	3	0.547511	0.160794	0.296709	0.235771	0.429377	0.304398	0.480067	0.28649	0.358837	0.385297	0.367136	0.366454	0.435004	0.387517	0.409889
	203253	0.3	0.6	4	0.514999	0.165587	0.292023	0.241861	0.427174	0.308853	0.471257	0.283843	0.354292	0.451916	0.42096	0.423112	0.488542	0.323215	0.389043
	203253	0.3	0.6	5	0.476202	0.169035	0.283716	0.241328	0.415927	0.305437	0.452367	0.280167	0.346027	0.470701	0.489534	0.464969	0.50703	0.307874	0.383115
	203253	0.3	0.6	6	0.462376	0.168828	0.279396	0.240583	0.407101	0.302436	0.439064	0.27403	0.33745	0.468899	0.488297	0.46216	0.524577	0.293194	0.376152
	203253	0.3	0.6	7	0.451986	0.170854	0.277891	0.239037	0.404838	0.30059	0.43534	0.272466	0.335164	0.467489	0.484062	0.458017	0.491404	0.257858	0.338233
	203253	0.3	0.6	8	0.446204	0.171563	0.276681	0.238453	0.397583	0.298111	0.429556	0.269171	0.330956	0.461995	0.484732	0.455138	0.487563	0.259459	0.338685
	203253	0.3	0.6	9	0.442517	0.171047	0.275121	0.2407	0.395738	0.299335	0.424384	0.27133	0.331021	0.453967	0.481669	0.446964	0.461478	0.251821	0.325837
	203253	0.3	0.7	1.2	0.592844	0.145226	0.293421	0.228296	0.393631	0.288987	0.437329	0.280936	0.342106	0.376234	0.362386	0.359195	0.38637	0.442977	0.412741
	203253	0.3	0.7	10	0.452237	0.168863	0.276345	0.248114	0.394409	0.304607	0.425529	0.277939	0.336251	0.4541	0.479872	0.444766	0.484969	0.251084	0.330867
	203253	0.3	0.7	11	0.449891	0.169362	0.276034	0.247623	0.391662	0.303415	0.421452	0.277288	0.334498	0.440038	0.477219	0.433429	0.454543	0.244801	0.31822
	203253	0.3	0.7	13	0.44545	0.169829	0.275046	0.249832	0.387981	0.303945	0.415294	0.278308	0.333274	0.448664	0.47824	0.440571	0.475226	0.240778	0.319619
	203253	0.3	0.7	15	0.44478	0.170835	0.275652	0.249837	0.383274	0.302494	0.411309	0.277572	0.331459	0.464079	0.47657	0.442994	0.532919	0.222715	0.314144
	203253	0.3	0.7	2	0.583543	0.151202	0.29704	0.236907	0.425025	0.304235	0.469338	0.291444	0.359592	0.378066	0.364609	0.361104	0.445623	0.485216	0.464578
	203253	0.3	0.7	3	0.555556	0.157427	0.295735	0.239548	0.426167	0.3067	0.475053	0.29147	0.361277	0.384839	0.367072	0.365842	0.430885	0.396364	0.412904
	203253	0.3	0.7	4	0.522457	0.162424	0.291306	0.246458	0.428717	0.312988	0.469705	0.290123	0.358692	0.449184	0.423935	0.425131	0.432952	0.336891	0.378928
	203253	0.3	0.7	5	0.485504	0.165849	0.283761	0.243905	0.416869	0.307749	0.450752	0.2832	0.347851	0.464753	0.489918	0.463535	0.432349	0.319236	0.367281
	203253	0.3	0.7	6	0.469248	0.166057	0.279145	0.243522	0.408776	0.305216	0.439575	0.277855	0.340488	0.464313	0.487727	0.461643	0.438924	0.302311	0.358029
	203253	0.3	0.7	7	0.462293	0.167838	0.27855	0.242896	0.405189	0.303722	0.43439	0.276563	0.337959	0.46375	0.486758	0.459095	0.468909	0.27402	0.345903
	203253	0.3	0.7	8	0.457768	0.167957	0.277282	0.243097	0.398445	0.301962	0.429814	0.274132	0.334758	0.460769	0.482845	0.453813	0.465473	0.260051	0.333681
	203253	0.3	0.7	9	0.453494	0.168248	0.276224	0.246462	0.398423	0.304539	0.425695	0.27704	0.335644	0.4558	0.479765	0.446453	0.459731	0.245276	0.319886
	203253	0.3	0.8	1.2	0.591419	0.144357	0.292191	0.231407	0.391576	0.290902	0.433687	0.284798	0.343816	0.374783	0.358727	0.357074	0.375142	0.399198	0.386796
	203253	0.3	0.8	10	0.458019	0.167728	0.277169	0.251826	0.391115	0.306383	0.421906	0.284524	0.339857	0.454136	0.479923	0.444656	0.483619	0.251829	0.331198
	203253	0.3	0.8	11	0.455086	0.167792	0.276333	0.251331	0.388607	0.305245	0.418437	0.28293	0.337594	0.448294	0.475726	0.435621	0.486847	0.233994	0.316073
	203253	0.3	0.8	13	0.450645	0.168575	0.275622	0.253141	0.385549	0.30562	0.412146	0.283026	0.335595	0.446672	0.477115	0.438001	0.470118	0.224339	0.303736
	203253	0.3	0.8	15	0.449975	0.169969	0.276554	0.253778	0.381173	0.304696	0.408499	0.283181	0.334488	0.456275	0.477894	0.444299	0.471159	0.233682	0.312414
	203253	0.3	0.8	2	0.583208	0.149433	0.295213	0.23922	0.41783	0.304248	0.460609	0.294051	0.35895	0.376111	0.364765	0.359106	0.403143	0.490355	0.442493
	203253	0.3	0.8	3	0.555639	0.155302	0.293755	0.241504	0.421017	0.306941	0.467714	0.294495	0.361422	0.390172	0.368759	0.369488	0.51033	0.425511	0.464077
	203253	0.3	0.8	4	0.528322	0.159785	0.290548	0.249633	0.423722	0.314173	0.462359	0.294795	0.360036	0.448898	0.42767	0.426497	0.448553	0.373703	0.407721
	203253	0.3	0.8	5	0.491285	0.164085	0.283924	0.247562	0.414534	0.309994	0.447974	0.288375	0.350879	0.465678	0.489074	0.463557	0.450535	0.325667	0.378057
	203253	0.3	0.8	6	0.475951	0.165205	0.28041	0.246587	0.405396	0.306651	0.436201	0.282575	0.342971	0.464085	0.487108	0.460316	0.450593	0.280955	0.346105
	203253	0.3	0.8	7	0.467572	0.165938	0.278546	0.24605	0.400001	0.304683	0.42993	0.281535	0.340257	0.461731	0.481074	0.454641	0.458436	0.249038	0.322749
	203253	0.3	0.8	8	0.462293	0.166804	0.277691	0.246248	0.394167	0.303124	0.425173	0.279449	0.337242	0.457761	0.482867	0.452561	0.441003	0.256734	0.324536
	203253	0.3	0.8	9	0.457768	0.167007	0.276497	0.249724	0.394478	0.305837	0.421603	0.283177	0.338796	0.451037	0.482109	0.445848	0.446372	0.258206	0.327163
	203253	0.35	0.6	1.2	0.579604	0.152348	0.297156	0.226014	0.400197	0.288881	0.448857	0.276765	0.342404	0.365869	0.348877	0.347964	0.390007	0.393155	0.391575
	203253	0.35	0.6	10	0.434054	0.175829	0.276259	0.243184	0.390798	0.299806	0.42011	0.27395	0.331641	0.454058	0.477187	0.442284	0.491082	0.230899	0.314109
	203253	0.35	0.6	11	0.432797	0.176616	0.276476	0.24371	0.388208	0.299438	0.416822	0.274258	0.330835	0.452467	0.480602	0.441787	0.506631	0.250556	0.335293
	203253	0.35	0.6	13	0.426931	0.176663	0.274632	0.24517	0.386353	0.29998	0.414232	0.275114	0.330635	0.453296	0.474598	0.436376	0.511377	0.209805	0.297538
	203253	0.35	0.6	15	0.424753	0.176845	0.274072	0.243108	0.383892	0.297695	0.411077	0.272	0.32738	0.451376	0.478514	0.441615	0.471986	0.231351	0.310504
	203253	0.35	0.6	2	0.570471	0.157116	0.299383	0.231205	0.417019	0.29748	0.467926	0.284291	0.353693	0.367089	0.350104	0.34871	0.431958	0.411212	0.42133
	203253	0.35	0.6	3	0.55279	0.162146	0.299387	0.23398	0.424998	0.301804	0.478523	0.28717	0.358936	0.374664	0.358604	0.355934	0.399875	0.406662	0.40324
	203253	0.35	0.6	4	0.506285	0.169607	0.293035	0.241498	0.422895	0.307433	0.464216	0.284471	0.352767	0.464326	0.492774	0.462228	0.441609	0.344104	0.386806
	203253	0.35	0.6	5	0.479889	0.170244	0.285829	0.241721	0.409182	0.30391	0.447163	0.279577	0.344047	0.47182	0.491614	0.467117	0.496124	0.331381	0.397354
	203253	0.35	0.6	6	0.460701	0.171443	0.28104	0.241112	0.401368	0.301253	0.432884	0.274382	0.335872	0.46436	0.491554	0.462768	0.467024	0.335887	0.390747
	203253	0.35	0.6	7	0.44788	0.172754	0.27816	0.240612	0.396706	0.299543	0.427296	0.273157	0.333267	0.468465	0.484691	0.459392	0.485315	0.256248	0.335403
	203253	0.35	0.6	8	0.441428	0.17351	0.276753	0.241906	0.393806	0.299708	0.425527	0.274711	0.333878	0.462423	0.484148	0.453807	0.491973	0.261209	0.341239
	203253	0.35	0.6	9	0.435143	0.175536	0.276375	0.243981	0.390712	0.300386	0.420324	0.275804	0.333062	0.458727	0.479707	0.447172	0.502283	0.229783	0.315316
	203253	0.35	0.7	1.2	0.578767	0.151495	0.296108	0.22842	0.401592	0.291206	0.446615	0.279983	0.344192	0.367433	0.348244	0.348541	0.401513	0.394074	0.397759
	203253	0.35	0.7	10	0.446958	0.172543	0.277704	0.24762	0.391261	0.303292	0.418695	0.278874	0.334772	0.456375	0.485683	0.445663	0.505576	0.260429	0.343775
	203253	0.35	0.7	11	0.445115	0.173022	0.277515	0.247458	0.389954	0.302778	0.417026	0.278596	0.334037	0.452558	0.474599	0.433943	0.523583	0.23182	0.321357
	203253	0.35	0.7	13	0.439333	0.17313	0.275793	0.248874	0.38742	0.303063	0.412402	0.279182	0.332961	0.451927	0.48431	0.443394	0.472508	0.266904	0.341121
	203253	0.35	0.7	15	0.43749	0.172857	0.274997	0.245552	0.383853	0.299508	0.40938	0.27525	0.329176	0.452533	0.478305	0.440819	0.482281	0.237599	0.318357
	203253	0.35	0.7	2	0.57022	0.15528	0.297562	0.233629	0.416286	0.29929	0.463708	0.287452	0.354901	0.366961	0.349821	0.349312	0.428214	0.408904	0.418336
	203253	0.35	0.7	3	0.553042	0.159993	0.297461	0.235572	0.424289	0.302944	0.471268	0.288856	0.358174	0.377432	0.35771	0.358251	0.440278	0.381221	0.408627
	203253	0.35	0.7	4	0.509972	0.166301	0.291219	0.2439	0.423846	0.309627	0.459153	0.288988	0.354718	0.466702	0.488055	0.463335	0.468928	0.319922	0.380352
	203253	0.35	0.7	5	0.487598	0.16701	0.285366	0.24458	0.412154	0.306987	0.445898	0.285689	0.348252	0.469446	0.485843	0.462081	0.480466	0.286181	0.358706
	203253	0.35	0.7	6	0.472348	0.167951	0.281658	0.243752	0.404739	0.304264	0.433049	0.278656	0.339106	0.467077	0.486843	0.461052	0.491526	0.289225	0.364166
	203253	0.35	0.7	7	0.459108	0.169244	0.27875	0.243378	0.400101	0.302654	0.427001	0.276626	0.335745	0.468135	0.483282	0.457281	0.52126	0.26794	0.353944
	203253	0.35	0.7	8	0.4545	0.1696	0.277639	0.244151	0.394466	0.301618	0.423594	0.277179	0.335091	0.458332	0.486718	0.454542	0.449326	0.287015	0.350282
	203253	0.35	0.7	9	0.448299	0.171983	0.277668	0.247227	0.391242	0.302992	0.418216	0.279185	0.334842	0.448116	0.479645	0.441271	0.445379	0.234543	0.307272
	203253	0.35	0.8	1.2	0.577174	0.14805	0.29232	0.231033	0.404016	0.293965	0.446797	0.28281	0.346374	0.36517	0.350982	0.347901	0.380037	0.414975	0.396739
	203253	0.35	0.8	10	0.457097	0.167833	0.276976	0.251653	0.394306	0.307228	0.420029	0.283292	0.338368	0.451109	0.47849	0.442639	0.470545	0.246537	0.323552
	203253	0.35	0.8	11	0.452572	0.169226	0.276744	0.251207	0.393447	0.306635	0.419865	0.283239	0.338277	0.449274	0.479882	0.440037	0.494869	0.263298	0.343719
	203253	0.35	0.8	13	0.444277	0.169919	0.274757	0.253532	0.388425	0.306806	0.413879	0.284823	0.337432	0.452678	0.480945	0.441422	0.492505	0.243029	0.325459
	203253	0.35	0.8	15	0.442517	0.169583	0.273941	0.250494	0.384194	0.303261	0.410332	0.281078	0.333623	0.456535	0.476593	0.440097	0.521303	0.220935	0.310342
	203253	0.35	0.8	2	0.568627	0.15123	0.293247	0.235559	0.416681	0.300972	0.461922	0.289552	0.355968	0.365264	0.346972	0.345356	0.384333	0.376885	0.380572
	203253	0.35	0.8	3	0.55388	0.156369	0.294295	0.239207	0.424468	0.30598	0.468262	0.292801	0.360306	0.378657	0.357257	0.358427	0.445397	0.378724	0.409363
	203253	0.35	0.8	4	0.515837	0.161481	0.288614	0.24865	0.424904	0.313716	0.455071	0.293621	0.356938	0.466035	0.487665	0.462895	0.461117	0.320113	0.37789
	203253	0.35	0.8	5	0.494134	0.16365	0.284368	0.247661	0.414262	0.309995	0.446359	0.289469	0.351188	0.465507	0.490713	0.462832	0.452975	0.32217	0.376536
	203253	0.35	0.8	6	0.4788	0.164437	0.280593	0.2476	0.405898	0.307577	0.434157	0.282878	0.342559	0.471029	0.485994	0.461868	0.504487	0.285391	0.364553
	203253	0.35	0.8	7	0.46908	0.166069	0.279105	0.246864	0.403001	0.306175	0.429293	0.281047	0.339701	0.465329	0.484603	0.457675	0.478783	0.265272	0.341393
	203253	0.35	0.8	8	0.464052	0.166321	0.277816	0.248749	0.398139	0.306195	0.426432	0.282731	0.340022	0.458267	0.484161	0.454084	0.457338	0.26872	0.338529
	203253	0.35	0.8	9	0.458354	0.167679	0.27723	0.250964	0.394565	0.306792	0.420633	0.283919	0.339012	0.45406	0.481606	0.44532	0.489398	0.249135	0.330185
	203253	0.4	0.6	1.2	0.566616	0.154949	0.296305	0.221882	0.410902	0.288161	0.4632	0.277865	0.347357	0.375575	0.356533	0.356697	0.435142	0.393912	0.413502
	203253	0.4	0.6	10	0.433635	0.172687	0.273648	0.236839	0.397326	0.296775	0.42391	0.272387	0.331662	0.457964	0.478233	0.444282	0.474397	0.236678	0.315802
	203253	0.4	0.6	11	0.429278	0.173228	0.272696	0.235917	0.393366	0.294944	0.418943	0.271359	0.329375	0.456077	0.477864	0.439315	0.540683	0.238492	0.330988
	203253	0.4	0.6	13	0.424585	0.173897	0.271724	0.234855	0.391391	0.293559	0.418519	0.270422	0.328553	0.452226	0.475027	0.437702	0.504546	0.225261	0.311464
	203253	0.4	0.6	15	0.420228	0.174178	0.270545	0.233433	0.38573	0.290851	0.412795	0.267461	0.324603	0.454015	0.477083	0.442554	0.499221	0.217408	0.302903
	203253	0.4	0.6	2	0.558991	0.157215	0.296449	0.22682	0.418655	0.294231	0.474523	0.284651	0.355843	0.375272	0.359964	0.357577	0.432506	0.431749	0.432128
	203253	0.4	0.6	3	0.54726	0.159143	0.295115	0.232097	0.424665	0.300149	0.480896	0.288801	0.360877	0.385002	0.369525	0.366668	0.451107	0.426816	0.438626
	203253	0.4	0.6	4	0.502179	0.163977	0.286959	0.236533	0.423287	0.303481	0.464318	0.285138	0.353309	0.468843	0.488326	0.464665	0.471669	0.331829	0.389581
	203253	0.4	0.6	5	0.480057	0.166748	0.282928	0.238583	0.414469	0.30284	0.4527	0.283298	0.348504	0.468362	0.486851	0.460887	0.47367	0.316932	0.379765
	203253	0.4	0.6	6	0.462209	0.168399	0.278991	0.235653	0.408678	0.298934	0.437988	0.274484	0.337475	0.466891	0.488899	0.460114	0.474483	0.301781	0.368921
	203253	0.4	0.6	7	0.45341	0.169117	0.276911	0.23645	0.402767	0.297971	0.431724	0.273112	0.334571	0.46417	0.485005	0.457328	0.477547	0.276782	0.350448
	203253	0.4	0.6	8	0.442936	0.171141	0.275327	0.235934	0.398326	0.296341	0.429596	0.272633	0.333572	0.463036	0.482373	0.454033	0.481115	0.251948	0.330711
	203253	0.4	0.6	9	0.436065	0.171733	0.273654	0.236244	0.397562	0.296373	0.424239	0.273277	0.332422	0.451237	0.481917	0.446163	0.465072	0.265213	0.337795
	203253	0.4	0.7	1.2	0.566114	0.155771	0.296958	0.226239	0.41051	0.291711	0.461417	0.282535	0.35047	0.373957	0.355837	0.355728	0.397688	0.386172	0.391845
	203253	0.4	0.7	10	0.438914	0.171239	0.274152	0.239034	0.394299	0.297635	0.42304	0.275516	0.3337	0.45284	0.479201	0.444289	0.476276	0.243627	0.322359
	203253	0.4	0.7	11	0.434557	0.172386	0.2737	0.237678	0.391226	0.295708	0.418974	0.273753	0.331141	0.456781	0.478068	0.439331	0.537768	0.235639	0.327691
	203253	0.4	0.7	13	0.430451	0.172352	0.272377	0.238205	0.388976	0.295468	0.418296	0.273652	0.330856	0.459098	0.479372	0.443447	0.511365	0.229135	0.316467
	203253	0.4	0.7	15	0.42844	0.172537	0.271886	0.237786	0.384098	0.29373	0.413009	0.271705	0.327777	0.455035	0.481457	0.446802	0.487775	0.231333	0.313829
	203253	0.4	0.7	2	0.558907	0.157895	0.297067	0.229587	0.418259	0.29645	0.472359	0.28758	0.357505	0.378849	0.359088	0.359314	0.484057	0.429568	0.455187
	203253	0.4	0.7	3	0.547595	0.158481	0.29459	0.232748	0.421541	0.299907	0.476713	0.289964	0.360594	0.38605	0.364691	0.365735	0.436591	0.373398	0.40253
	203253	0.4	0.7	4	0.503184	0.163506	0.286834	0.237981	0.421201	0.304128	0.46381	0.2867	0.354357	0.467324	0.489108	0.46449	0.454984	0.33381	0.38509
	203253	0.4	0.7	5	0.484079	0.165713	0.283228	0.240609	0.412251	0.303867	0.451985	0.286017	0.350339	0.468999	0.49206	0.46692	0.467196	0.337037	0.391584
	203253	0.4	0.7	6	0.466231	0.167424	0.279389	0.238053	0.404519	0.299723	0.434612	0.277804	0.338951	0.463531	0.48502	0.458381	0.446994	0.286517	0.349201
	203253	0.4	0.7	7	0.456092	0.168112	0.276902	0.238138	0.399772	0.298477	0.429091	0.274856	0.335077	0.467887	0.484057	0.458324	0.498594	0.268016	0.348629
	203253	0.4	0.7	8	0.446874	0.170003	0.275626	0.238117	0.39608	0.297426	0.428805	0.275075	0.335152	0.459645	0.482887	0.453155	0.485951	0.260409	0.339102
	203253	0.4	0.7	9	0.441093	0.170369	0.274132	0.238308	0.39467	0.297176	0.423428	0.276015	0.334188	0.455879	0.485455	0.447243	0.484925	0.282152	0.356738
	203253	0.4	0.8	1.2	0.564857	0.156281	0.297113	0.22817	0.410705	0.293361	0.456524	0.284892	0.350843	0.372877	0.358604	0.354147	0.38099	0.443626	0.409929
	203253	0.4	0.8	10	0.443523	0.173094	0.277076	0.241148	0.393346	0.298993	0.420595	0.278609	0.335186	0.454484	0.479251	0.4444	0.490515	0.237056	0.319637
	203253	0.4	0.8	11	0.438244	0.173475	0.275725	0.239708	0.389389	0.296742	0.416392	0.276656	0.332437	0.448626	0.476252	0.435096	0.463057	0.239136	0.315393
	203253	0.4	0.8	13	0.435059	0.173775	0.274959	0.240951	0.386702	0.296904	0.41572	0.277322	0.332702	0.451015	0.480042	0.441136	0.501998	0.240907	0.325573
	203253	0.4	0.8	15	0.433216	0.174054	0.274596	0.240427	0.382677	0.295315	0.411968	0.275554	0.330228	0.459132	0.478625	0.44599	0.505445	0.22811	0.314352
	203253	0.4	0.8	2	0.55765	0.157903	0.29674	0.230961	0.418054	0.29754	0.46596	0.289397	0.357043	0.373155	0.354767	0.354373	0.389283	0.377063	0.383075
	203253	0.4	0.8	3	0.54659	0.159234	0.295018	0.234232	0.423342	0.301594	0.469802	0.291697	0.359921	0.385892	0.366145	0.36628	0.437877	0.384898	0.409682
	203253	0.4	0.8	4	0.506704	0.162803	0.287216	0.238724	0.41826	0.303961	0.455843	0.288177	0.353118	0.469425	0.49251	0.466791	0.473108	0.367866	0.413902
	203253	0.4	0.8	5	0.488939	0.165676	0.284615	0.240186	0.41258	0.303619	0.445691	0.286755	0.348979	0.469489	0.488281	0.463587	0.476444	0.30926	0.375065
	203253	0.4	0.8	6	0.473605	0.16795	0.282032	0.23964	0.403461	0.300685	0.431969	0.281111	0.340582	0.463305	0.487228	0.460582	0.447757	0.307197	0.364392
	203253	0.4	0.8	7	0.46489	0.168612	0.279975	0.239726	0.40031	0.299873	0.426015	0.278376	0.336723	0.457671	0.490739	0.453951	0.42066	0.312096	0.358336
	203253	0.4	0.8	8	0.453075	0.171106	0.278431	0.239993	0.397853	0.299389	0.427574	0.27859	0.337366	0.464363	0.481107	0.452824	0.494082	0.248003	0.330242
	203253	0.4	0.8	9	0.445785	0.172408	0.277231	0.240925	0.394907	0.299271	0.42172	0.279426	0.336134	0.450992	0.477433	0.443306	0.444003	0.227709	0.301032
	215209	0.2	0.6	1.2	0.60491	0.143584	0.294713	0.207409	0.377826	0.267805	0.404253	0.256197	0.31363	0.325179	0.311231	0.309971	0.3464	0.405289	0.373538
	215209	0.2	0.6	10	0.441428	0.174156	0.277267	0.245035	0.379011	0.297641	0.396462	0.270573	0.321638	0.459	0.478096	0.444224	0.462854	0.218868	0.2972
	215209	0.2	0.6	11	0.442266	0.173569	0.277063	0.24645	0.376255	0.297823	0.394481	0.272255	0.322165	0.454523	0.475062	0.437213	0.47818	0.197753	0.279796
	215209	0.2	0.6	13	0.441009	0.173214	0.276385	0.247829	0.373939	0.298095	0.39029	0.272495	0.320924	0.459009	0.480393	0.450002	0.437524	0.223191	0.295593
	215209	0.2	0.6	15	0.437741	0.172673	0.274929	0.246933	0.368884	0.295834	0.385157	0.271418	0.318436	0.457471	0.482548	0.453331	0.413112	0.23054	0.295933
	215209	0.2	0.6	2	0.583208	0.15342	0.299125	0.224368	0.422547	0.293102	0.451868	0.274784	0.341748	0.327611	0.312206	0.310839	0.422503	0.411855	0.417111
	215209	0.2	0.6	3	0.543741	0.162259	0.29703	0.236395	0.432142	0.305611	0.458499	0.282802	0.349829	0.415664	0.394881	0.394739	0.41382	0.364763	0.387746
	215209	0.2	0.6	4	0.507374	0.167662	0.291663	0.241824	0.420659	0.307104	0.445	0.280017	0.343737	0.466899	0.489952	0.463737	0.444138	0.333002	0.380623
	215209	0.2	0.6	5	0.477711	0.170977	0.285793	0.241183	0.405916	0.302581	0.43456	0.276514	0.337973	0.46711	0.487893	0.46372	0.442524	0.286269	0.347646
	215209	0.2	0.6	6	0.462712	0.172402	0.28244	0.238798	0.392074	0.296816	0.41658	0.270179	0.327775	0.466345	0.486998	0.460636	0.442994	0.273487	0.338189
	215209	0.2	0.6	7	0.450226	0.175408	0.281022	0.23805	0.385522	0.294347	0.407843	0.266489	0.322351	0.467363	0.486028	0.459815	0.47728	0.275211	0.349115
	215209	0.2	0.6	8	0.441847	0.175551	0.278508	0.238485	0.381542	0.29351	0.403361	0.265235	0.32003	0.457697	0.484727	0.453994	0.432435	0.256318	0.32186
	215209	0.2	0.6	9	0.440171	0.173473	0.276329	0.242489	0.379451	0.295889	0.39779	0.268588	0.320664	0.456404	0.479286	0.446793	0.435284	0.233123	0.303631
	215209	0.2	0.7	1.2	0.604575	0.141997	0.292998	0.212398	0.38407	0.273529	0.407277	0.261755	0.31869	0.325096	0.313045	0.310383	0.34325	0.430964	0.382138
	215209	0.2	0.7	10	0.446623	0.171353	0.276641	0.249256	0.378465	0.300563	0.396849	0.274684	0.324654	0.447134	0.48515	0.442559	0.409684	0.240178	0.302824
	215209	0.2	0.7	11	0.446874	0.170963	0.276404	0.250194	0.377252	0.300858	0.396127	0.275999	0.325328	0.4555	0.477772	0.44304	0.463067	0.214134	0.292848
	215209	0.2	0.7	13	0.443355	0.170962	0.275312	0.250932	0.372908	0.299995	0.389792	0.275183	0.322611	0.457449	0.482324	0.451813	0.426297	0.239647	0.306815
	215209	0.2	0.7	15	0.439584	0.169861	0.273255	0.25023	0.369059	0.298244	0.385535	0.274402	0.320611	0.459681	0.481246	0.452546	0.427304	0.208006	0.279806
	215209	0.2	0.7	2	0.584381	0.150759	0.296818	0.227748	0.420216	0.295397	0.45092	0.278763	0.344532	0.325508	0.312154	0.309894	0.370781	0.411728	0.390183
	215209	0.2	0.7	3	0.547846	0.159254	0.295376	0.23864	0.430844	0.307152	0.458402	0.28538	0.351766	0.415812	0.398624	0.395268	0.400745	0.405336	0.403028
	215209	0.2	0.7	4	0.50419	0.164104	0.287645	0.24502	0.423041	0.310311	0.4469	0.283174	0.346678	0.470037	0.486686	0.463665	0.479253	0.305754	0.373331
	215209	0.2	0.7	5	0.4819	0.168204	0.284707	0.245572	0.407966	0.306593	0.435685	0.28178	0.342225	0.469489	0.487733	0.463886	0.47282	0.285177	0.355772
	215209	0.2	0.7	6	0.466566	0.170167	0.28177	0.242935	0.394428	0.300678	0.418509	0.273869	0.331081	0.472488	0.488783	0.462306	0.490861	0.30565	0.376722
	215209	0.2	0.7	7	0.454416	0.171542	0.279198	0.242352	0.386405	0.297876	0.408785	0.270629	0.32566	0.462812	0.486165	0.458944	0.432478	0.270977	0.333189
	215209	0.2	0.7	8	0.447796	0.172212	0.277697	0.243452	0.381913	0.297354	0.404351	0.270169	0.323914	0.462335	0.482923	0.454806	0.462975	0.250943	0.325473
	215209	0.2	0.7	9	0.444193	0.171072	0.275661	0.244607	0.378574	0.297191	0.398506	0.2712	0.322753	0.450666	0.480816	0.446974	0.405969	0.23263	0.295774
	215209	0.2	0.8	1.2	0.604491	0.13498	0.285647	0.216193	0.383234	0.276439	0.402081	0.265482	0.319806	0.324272	0.314027	0.30942	0.338788	0.443455	0.384119
	215209	0.2	0.8	10	0.451567	0.164619	0.272647	0.254428	0.379516	0.304631	0.394868	0.280522	0.328016	0.44896	0.477397	0.441688	0.420949	0.217456	0.286771
	215209	0.2	0.8	11	0.450478	0.163838	0.271672	0.254351	0.377659	0.303976	0.393427	0.280613	0.327579	0.455776	0.484813	0.447097	0.47472	0.245649	0.323763
	215209	0.2	0.8	13	0.447293	0.164714	0.271432	0.254916	0.374641	0.303395	0.388215	0.279959	0.325317	0.455071	0.488361	0.453787	0.379981	0.266588	0.313341
	215209	0.2	0.8	15	0.443188	0.163115	0.268869	0.254149	0.369812	0.301261	0.383844	0.278824	0.323012	0.466874	0.486824	0.459663	0.473054	0.260716	0.336162
	215209	0.2	0.8	2	0.586643	0.142753	0.289388	0.23028	0.419149	0.297251	0.445485	0.281293	0.344842	0.324486	0.313865	0.310013	0.359243	0.443871	0.397098
	215209	0.2	0.8	3	0.550779	0.151021	0.288409	0.240917	0.428013	0.3083	0.448157	0.288106	0.350735	0.419151	0.396219	0.397257	0.438001	0.377566	0.405544
	215209	0.2	0.8	4	0.508798	0.155394	0.281184	0.245981	0.418976	0.309975	0.437562	0.285395	0.345465	0.465212	0.487114	0.461999	0.415995	0.304488	0.351613
	215209	0.2	0.8	5	0.487766	0.160921	0.280164	0.247117	0.403235	0.306438	0.425911	0.284075	0.340825	0.465955	0.487817	0.462879	0.437887	0.294557	0.352198
	215209	0.2	0.8	6	0.47218	0.162789	0.277247	0.247318	0.392072	0.30331	0.411911	0.278341	0.332202	0.461323	0.49333	0.460935	0.415585	0.33394	0.370316
	215209	0.2	0.8	7	0.459779	0.164079	0.274663	0.247475	0.385043	0.301299	0.402993	0.27619	0.327754	0.46319	0.490941	0.46117	0.439654	0.297629	0.354962
	215209	0.2	0.8	8	0.452991	0.164361	0.272863	0.248373	0.383074	0.301356	0.40003	0.275578	0.326341	0.461484	0.483136	0.454579	0.445495	0.250081	0.320338
	215209	0.2	0.8	9	0.449807	0.163452	0.271149	0.249331	0.379817	0.301043	0.396179	0.276467	0.32567	0.45516	0.483352	0.449383	0.415267	0.271828	0.328575
	215209	0.25	0.6	1.2	0.599045	0.145439	0.295168	0.214709	0.384324	0.275503	0.420735	0.265701	0.325711	0.361011	0.351822	0.345026	0.334837	0.458715	0.387107
	215209	0.25	0.6	10	0.435227	0.173601	0.274875	0.241578	0.389446	0.298187	0.413822	0.270695	0.327295	0.455393	0.487509	0.449246	0.475198	0.299524	0.367444
	215209	0.25	0.6	11	0.434389	0.173965	0.274897	0.243435	0.387863	0.299128	0.411024	0.272781	0.327929	0.458247	0.482864	0.439962	0.501877	0.287438	0.365529
	215209	0.25	0.6	13	0.431875	0.173898	0.274048	0.243245	0.386545	0.298592	0.407188	0.271833	0.32602	0.451146	0.478162	0.442824	0.454148	0.220674	0.297023
	215209	0.25	0.6	15	0.43221	0.17246	0.273018	0.247023	0.381611	0.29991	0.401868	0.273323	0.325359	0.459031	0.479194	0.444798	0.470288	0.236419	0.314657
	215209	0.25	0.6	2	0.581532	0.154	0.299259	0.226939	0.422791	0.295346	0.460929	0.279556	0.34803	0.363111	0.348363	0.34636	0.385952	0.414141	0.39955
	215209	0.25	0.6	3	0.542316	0.161716	0.296144	0.232426	0.431155	0.302033	0.470096	0.280089	0.35103	0.378259	0.358353	0.358082	0.468215	0.367046	0.411503
	215209	0.25	0.6	4	0.517764	0.166997	0.294049	0.239451	0.42675	0.306772	0.461845	0.282176	0.350317	0.471685	0.492616	0.468527	0.482644	0.357092	0.410482
	215209	0.25	0.6	5	0.482068	0.169733	0.286047	0.238984	0.413171	0.302815	0.444595	0.276688	0.341098	0.465118	0.486086	0.460389	0.4483	0.298002	0.358017
	215209	0.25	0.6	6	0.470253	0.170658	0.283288	0.237937	0.39992	0.298361	0.429579	0.272887	0.333757	0.470962	0.486613	0.462278	0.507305	0.288357	0.367706
	215209	0.25	0.6	7	0.456176	0.172251	0.280316	0.238476	0.395646	0.297583	0.423651	0.273031	0.33206	0.466786	0.483655	0.458178	0.48148	0.25691	0.335045
	215209	0.25	0.6	8	0.448634	0.173685	0.279143	0.237412	0.391562	0.295597	0.419273	0.26996	0.328443	0.462892	0.482937	0.454464	0.484649	0.249975	0.329829
	215209	0.25	0.6	9	0.43992	0.173938	0.27662	0.238724	0.392374	0.296845	0.41752	0.270164	0.328055	0.455747	0.482838	0.448282	0.480163	0.258435	0.336017
	215209	0.25	0.7	1.2	0.59871	0.143704	0.293321	0.222439	0.388959	0.283023	0.423883	0.273474	0.332458	0.363408	0.352034	0.347155	0.37134	0.468028	0.414115
	215209	0.25	0.7	10	0.440255	0.170112	0.273665	0.242773	0.390365	0.299367	0.415429	0.27348	0.32983	0.453911	0.480459	0.44379	0.486711	0.23857	0.320192
	215209	0.25	0.7	11	0.439082	0.170904	0.273936	0.244052	0.3883	0.299724	0.412136	0.275014	0.329893	0.443835	0.478512	0.438474	0.428651	0.249465	0.315384
	215209	0.25	0.7	13	0.434808	0.170651	0.272398	0.246724	0.386509	0.301187	0.407214	0.275517	0.328663	0.456117	0.479631	0.445096	0.477836	0.222328	0.303461
	215209	0.25	0.7	15	0.434222	0.169863	0.271584	0.249957	0.381126	0.30191	0.401981	0.276656	0.327747	0.458778	0.48	0.446489	0.467156	0.227768	0.30623
	215209	0.25	0.7	2	0.582872	0.151434	0.297097	0.230197	0.422581	0.29804	0.459278	0.28298	0.350192	0.364392	0.348431	0.346894	0.396016	0.414774	0.405178
	215209	0.25	0.7	3	0.552539	0.15751	0.295009	0.236189	0.433642	0.305813	0.470903	0.28567	0.355611	0.375541	0.360394	0.357586	0.411545	0.408812	0.410174
	215209	0.25	0.7	4	0.523295	0.162513	0.29162	0.244444	0.430452	0.311816	0.463588	0.287962	0.355254	0.466601	0.49175	0.465536	0.451395	0.354803	0.397312
	215209	0.25	0.7	5	0.483995	0.166304	0.283708	0.241936	0.412824	0.30508	0.44468	0.279485	0.34324	0.469947	0.487861	0.46335	0.494211	0.291045	0.366346
	215209	0.25	0.7	6	0.473186	0.166562	0.28074	0.240969	0.400367	0.30086	0.430106	0.275883	0.33615	0.463712	0.486395	0.460738	0.443744	0.283237	0.345771
	215209	0.25	0.7	7	0.461957	0.168391	0.278907	0.24224	0.396254	0.300672	0.423631	0.276291	0.334453	0.463686	0.483792	0.456897	0.446542	0.255352	0.324907
	215209	0.25	0.7	8	0.45517	0.169934	0.278117	0.241187	0.393753	0.299141	0.420649	0.274167	0.331967	0.461838	0.483939	0.454685	0.480663	0.260389	0.337788
	215209	0.25	0.7	9	0.446623	0.170523	0.27597	0.242282	0.394595	0.300225	0.419509	0.273962	0.331461	0.458686	0.483353	0.448838	0.47869	0.282936	0.355656
	215209	0.25	0.8	1.2	0.598291	0.140585	0.290018	0.22555	0.385748	0.284658	0.415086	0.276682	0.332038	0.361979	0.347234	0.344898	0.35228	0.401972	0.375489
	215209	0.25	0.8	10	0.445282	0.166938	0.272643	0.246648	0.386347	0.301082	0.408665	0.277763	0.330733	0.453914	0.480804	0.445913	0.455032	0.23753	0.312127
	215209	0.25	0.8	11	0.444277	0.168137	0.273312	0.248137	0.385416	0.301904	0.407984	0.279769	0.331925	0.45057	0.475419	0.436117	0.470607	0.227489	0.306714
	215209	0.25	0.8	13	0.437741	0.168287	0.271415	0.25116	0.383383	0.303496	0.402556	0.280684	0.330751	0.45755	0.478699	0.44315	0.512585	0.222769	0.310566
	215209	0.25	0.8	15	0.437071	0.16741	0.270499	0.253639	0.378082	0.303603	0.397469	0.280867	0.329146	0.455254	0.477749	0.443158	0.436399	0.225316	0.297191
	215209	0.25	0.8	2	0.582872	0.1471	0.292815	0.232386	0.416967	0.298443	0.448195	0.285425	0.348753	0.364303	0.343672	0.343734	0.410723	0.372485	0.39067
	215209	0.25	0.8	3	0.553293	0.153376	0.291311	0.237867	0.427647	0.305698	0.457854	0.288017	0.353599	0.376397	0.359907	0.358643	0.415009	0.40694	0.410935
	215209	0.25	0.8	4	0.521032	0.157576	0.286535	0.246101	0.423502	0.311301	0.450836	0.290182	0.353094	0.465458	0.489739	0.464181	0.443633	0.337253	0.383197
	215209	0.25	0.8	5	0.491621	0.160811	0.281173	0.244043	0.408553	0.305563	0.43414	0.282814	0.342507	0.467998	0.494565	0.465006	0.463563	0.347182	0.397019
	215209	0.25	0.8	6	0.47637	0.162277	0.278036	0.243417	0.395867	0.301464	0.419188	0.279115	0.335103	0.462817	0.488112	0.460961	0.425877	0.314617	0.361888
	215209	0.25	0.8	7	0.466315	0.164456	0.276926	0.244451	0.391541	0.300987	0.413986	0.278782	0.33319	0.465242	0.483943	0.456742	0.484172	0.258571	0.33711
	215209	0.25	0.8	8	0.455505	0.166212	0.275155	0.242567	0.390863	0.299355	0.413626	0.275959	0.33105	0.46324	0.482822	0.453389	0.496089	0.255634	0.337404
	215209	0.25	0.8	9	0.452154	0.166592	0.274454	0.24481	0.390336	0.300901	0.41154	0.277156	0.331237	0.455809	0.479615	0.447027	0.46414	0.246967	0.322391
	215209	0.3	0.6	1.2	0.590833	0.145406	0.293105	0.220927	0.386012	0.281018	0.432679	0.272924	0.334717	0.375199	0.357693	0.355987	0.3741	0.375215	0.374656
	215209	0.3	0.6	10	0.43992	0.169378	0.27297	0.240079	0.385789	0.295972	0.416975	0.271541	0.328898	0.451334	0.480263	0.44462	0.46552	0.246652	0.322454
	215209	0.3	0.6	11	0.436568	0.169079	0.271688	0.241143	0.3849	0.296516	0.416625	0.271938	0.32908	0.450312	0.473188	0.431788	0.5013	0.21647	0.302371
	215209	0.3	0.6	13	0.435311	0.168584	0.270899	0.243106	0.38131	0.296913	0.410364	0.272808	0.327737	0.453363	0.475284	0.438003	0.473965	0.215093	0.295901
	215209	0.3	0.6	15	0.433048	0.169096	0.270604	0.24259	0.379243	0.295901	0.408536	0.271078	0.325906	0.457938	0.476011	0.442832	0.495825	0.215424	0.300352
	215209	0.3	0.6	2	0.581783	0.151266	0.296655	0.231308	0.417017	0.297565	0.466399	0.285574	0.354245	0.377432	0.360119	0.358242	0.408463	0.405389	0.406921
	215209	0.3	0.6	3	0.543992	0.158407	0.293551	0.234553	0.421202	0.301314	0.474109	0.285873	0.35668	0.387567	0.369566	0.368317	0.437946	0.401224	0.418781
	215209	0.3	0.6	4	0.517262	0.164246	0.291476	0.238382	0.421284	0.304476	0.471974	0.283607	0.354311	0.434141	0.411038	0.411566	0.450416	0.362695	0.401823
	215209	0.3	0.6	5	0.475197	0.166881	0.281605	0.23575	0.407936	0.298813	0.444706	0.276315	0.340847	0.466768	0.487751	0.462562	0.463795	0.289662	0.356607
	215209	0.3	0.6	6	0.458187	0.166948	0.276574	0.234964	0.398429	0.295603	0.430834	0.269522	0.331601	0.465222	0.485468	0.458252	0.458018	0.267743	0.337938
	215209	0.3	0.6	7	0.449807	0.167926	0.274835	0.235697	0.396259	0.295581	0.427459	0.269832	0.330829	0.471084	0.482424	0.456736	0.524041	0.243243	0.332261
	215209	0.3	0.6	8	0.446791	0.169043	0.274822	0.237126	0.392291	0.295583	0.424787	0.269133	0.329503	0.459147	0.483433	0.453817	0.443361	0.26161	0.329057
	215209	0.3	0.6	9	0.443104	0.168478	0.273228	0.238801	0.390436	0.296348	0.418949	0.269658	0.32812	0.461882	0.482277	0.450433	0.506136	0.256065	0.340078
	215209	0.3	0.7	1.2	0.590665	0.146882	0.294547	0.225895	0.389083	0.285838	0.435011	0.278348	0.339477	0.376049	0.361531	0.358747	0.358025	0.41972	0.386426
	215209	0.3	0.7	10	0.444444	0.172337	0.276757	0.244851	0.390892	0.301097	0.423404	0.276015	0.33418	0.457453	0.477981	0.444029	0.490297	0.230214	0.313315
	215209	0.3	0.7	11	0.441512	0.172818	0.276226	0.245908	0.389554	0.301495	0.423075	0.27698	0.334783	0.451812	0.47761	0.438167	0.484924	0.239248	0.320413
	215209	0.3	0.7	13	0.440087	0.171418	0.274661	0.248127	0.385475	0.301915	0.416053	0.277682	0.333068	0.450443	0.476588	0.439766	0.464317	0.222466	0.300807
	215209	0.3	0.7	15	0.438327	0.172252	0.274777	0.248785	0.382025	0.301334	0.412371	0.277025	0.331412	0.457411	0.477555	0.444395	0.481398	0.217291	0.299428
	215209	0.3	0.7	2	0.58237	0.153099	0.298597	0.235269	0.419045	0.301348	0.468178	0.289491	0.357764	0.377292	0.363292	0.359858	0.406626	0.429968	0.417971
	215209	0.3	0.7	3	0.550193	0.160075	0.296769	0.238147	0.420144	0.303988	0.474215	0.290382	0.360199	0.387826	0.366199	0.367361	0.449578	0.361882	0.400991
	215209	0.3	0.7	4	0.523043	0.165529	0.294243	0.242288	0.425255	0.308697	0.474623	0.288098	0.358553	0.437517	0.411803	0.412704	0.510609	0.364683	0.425482
	215209	0.3	0.7	5	0.478381	0.168815	0.284179	0.23651	0.411072	0.300264	0.448643	0.277798	0.343131	0.467997	0.487083	0.462949	0.480854	0.288147	0.360355
	215209	0.3	0.7	6	0.462628	0.168635	0.279312	0.236694	0.401447	0.297803	0.43462	0.271845	0.33448	0.463682	0.485611	0.459869	0.428315	0.276641	0.336161
	215209	0.3	0.7	7	0.454416	0.170537	0.278379	0.237663	0.39973	0.298092	0.431457	0.272069	0.333708	0.460832	0.483515	0.455681	0.438599	0.264641	0.330104
	215209	0.3	0.7	8	0.451316	0.171468	0.278184	0.239621	0.396777	0.298795	0.429526	0.271829	0.332949	0.457024	0.481895	0.448934	0.46441	0.247124	0.32259
	215209	0.3	0.7	9	0.447545	0.171132	0.276748	0.242952	0.396032	0.301155	0.425043	0.273767	0.333032	0.457121	0.480188	0.447207	0.494494	0.249745	0.331876
	215209	0.3	0.8	1.2	0.589995	0.144998	0.292486	0.228941	0.386359	0.287514	0.429196	0.282009	0.340372	0.376431	0.362255	0.358762	0.351429	0.430502	0.386967
	215209	0.3	0.8	10	0.452908	0.169546	0.277108	0.24832	0.387308	0.302619	0.418391	0.280185	0.335617	0.453725	0.48017	0.445746	0.459439	0.256516	0.32922
	215209	0.3	0.8	11	0.451735	0.169407	0.276635	0.249264	0.386377	0.303033	0.417547	0.280531	0.335592	0.444814	0.474812	0.434463	0.450908	0.231795	0.306189
	215209	0.3	0.8	13	0.449305	0.168285	0.274975	0.251536	0.38344	0.303788	0.411897	0.281074	0.334137	0.453701	0.47808	0.441759	0.487291	0.228518	0.31113
	215209	0.3	0.8	15	0.44788	0.169104	0.275206	0.251024	0.38016	0.302382	0.408768	0.280154	0.332455	0.452446	0.492026	0.447833	0.476461	0.295079	0.364449
	215209	0.3	0.8	2	0.581951	0.150171	0.295621	0.23712	0.411906	0.300978	0.45767	0.291671	0.356284	0.377807	0.360282	0.358816	0.403554	0.400911	0.402228
	215209	0.3	0.8	3	0.553042	0.156286	0.293995	0.239873	0.415613	0.304184	0.463128	0.292784	0.358763	0.385756	0.36932	0.366199	0.430562	0.406064	0.417954
	215209	0.3	0.8	4	0.526814	0.160818	0.291069	0.243792	0.418419	0.308081	0.459766	0.290615	0.356126	0.432486	0.409041	0.409672	0.439895	0.352254	0.391226
	215209	0.3	0.8	5	0.489861	0.164597	0.283954	0.241926	0.408155	0.303788	0.440098	0.283217	0.344644	0.464576	0.493933	0.464307	0.439591	0.37696	0.405874
	215209	0.3	0.8	6	0.477208	0.164863	0.280489	0.240504	0.398521	0.299976	0.427288	0.276335	0.335619	0.467145	0.48924	0.463471	0.499479	0.313894	0.385515
	215209	0.3	0.8	7	0.462879	0.166751	0.277823	0.240775	0.396189	0.299522	0.425125	0.276036	0.33473	0.46444	0.485546	0.459216	0.474321	0.28422	0.35545
	215209	0.3	0.8	8	0.459527	0.167521	0.277454	0.24318	0.393107	0.30048	0.422696	0.275931	0.333898	0.466923	0.484505	0.456783	0.516442	0.269365	0.35406
	215209	0.3	0.8	9	0.455505	0.16804	0.276664	0.246012	0.391738	0.302226	0.419272	0.277878	0.334237	0.458705	0.481181	0.449528	0.475071	0.251942	0.329266
	215209	0.35	0.6	1.2	0.583291	0.149667	0.295465	0.22437	0.399296	0.287301	0.447881	0.27685	0.342185	0.369749	0.354463	0.350558	0.379016	0.386622	0.382781
	215209	0.35	0.6	10	0.436987	0.173192	0.275105	0.244447	0.390884	0.30079	0.420708	0.274514	0.33224	0.455075	0.479272	0.44433	0.493519	0.238261	0.321371
	215209	0.35	0.6	11	0.435059	0.173853	0.275021	0.246599	0.387647	0.301439	0.418396	0.27729	0.333532	0.451999	0.47589	0.437053	0.495958	0.241267	0.324618
	215209	0.35	0.6	13	0.432546	0.173276	0.273769	0.247584	0.386193	0.301731	0.415892	0.279091	0.334027	0.453361	0.480502	0.443964	0.492752	0.243521	0.325953
	215209	0.35	0.6	15	0.431792	0.172998	0.273311	0.246668	0.383728	0.300299	0.41167	0.27613	0.330545	0.455198	0.480528	0.443766	0.503823	0.250216	0.334371
	215209	0.35	0.6	2	0.574074	0.154089	0.29742	0.229023	0.415095	0.295183	0.466776	0.284502	0.353528	0.3718	0.352967	0.353037	0.394443	0.36653	0.379974
	215209	0.35	0.6	3	0.555137	0.160304	0.298313	0.233701	0.423652	0.301232	0.478271	0.2886	0.35998	0.382582	0.36366	0.363638	0.426928	0.383564	0.404086
	215209	0.35	0.6	4	0.50486	0.166002	0.289496	0.242537	0.423017	0.308307	0.462558	0.286403	0.353765	0.469158	0.488793	0.464566	0.47426	0.326743	0.386918
	215209	0.35	0.6	5	0.482822	0.166793	0.283781	0.243187	0.41271	0.306041	0.447569	0.282523	0.346391	0.469456	0.490519	0.466218	0.476139	0.32588	0.386934
	215209	0.35	0.6	6	0.461119	0.168301	0.27858	0.242839	0.405473	0.303757	0.435403	0.276857	0.338484	0.466777	0.485971	0.46123	0.467913	0.270883	0.343125
	215209	0.35	0.6	7	0.448215	0.170195	0.276195	0.240584	0.398949	0.300159	0.428254	0.271999	0.332694	0.464884	0.48241	0.455876	0.482387	0.249457	0.328854
	215209	0.35	0.6	8	0.443188	0.170611	0.274978	0.241638	0.396563	0.300297	0.427545	0.272713	0.333012	0.46699	0.480935	0.452636	0.518829	0.241794	0.32986
	215209	0.35	0.6	9	0.439165	0.17185	0.274719	0.24371	0.394068	0.301165	0.423093	0.274637	0.333071	0.4573	0.484889	0.451083	0.4691	0.275774	0.347349
	215209	0.35	0.7	1.2	0.582621	0.151886	0.297476	0.228036	0.404451	0.29164	0.451305	0.281425	0.346672	0.370646	0.355146	0.352988	0.373612	0.412935	0.392291
	215209	0.35	0.7	10	0.441176	0.173896	0.276981	0.247878	0.395431	0.304733	0.424694	0.279481	0.337115	0.461253	0.479701	0.446212	0.52832	0.23874	0.328869
	215209	0.35	0.7	11	0.439082	0.174524	0.276822	0.249152	0.393832	0.305215	0.423856	0.280629	0.337683	0.453767	0.482495	0.441796	0.521363	0.251014	0.338874
	215209	0.35	0.7	13	0.43573	0.173816	0.275203	0.250194	0.391296	0.305227	0.419731	0.281969	0.337327	0.448109	0.477246	0.437865	0.491466	0.21798	0.30201
	215209	0.35	0.7	15	0.433886	0.173644	0.274484	0.248463	0.388195	0.302995	0.415234	0.278403	0.333322	0.447873	0.477293	0.437853	0.480616	0.219685	0.301539
	215209	0.35	0.7	2	0.574242	0.155774	0.299085	0.231987	0.416886	0.298092	0.467486	0.288159	0.356544	0.374716	0.35792	0.356714	0.446706	0.441195	0.443934
	215209	0.35	0.7	3	0.557483	0.161985	0.300506	0.236554	0.42676	0.304386	0.478626	0.291911	0.362646	0.382251	0.364592	0.363781	0.418534	0.387931	0.402652
	215209	0.35	0.7	4	0.509636	0.167138	0.291855	0.245343	0.427189	0.311682	0.464708	0.290242	0.357315	0.468042	0.48804	0.463864	0.475138	0.331697	0.390667
	215209	0.35	0.7	5	0.486006	0.168002	0.285745	0.245015	0.41505	0.308132	0.449314	0.28502	0.348788	0.468748	0.488617	0.464381	0.483046	0.305675	0.374416
	215209	0.35	0.7	6	0.464387	0.168992	0.280139	0.245424	0.408526	0.306635	0.438082	0.279193	0.341039	0.465281	0.48734	0.461037	0.456444	0.283063	0.349429
	215209	0.35	0.7	7	0.452908	0.170457	0.277851	0.24375	0.403793	0.303994	0.432215	0.276682	0.337386	0.467278	0.486494	0.460037	0.508275	0.28343	0.363925
	215209	0.35	0.7	8	0.448048	0.170894	0.276711	0.244535	0.399521	0.30338	0.430441	0.277331	0.337325	0.464109	0.483461	0.45544	0.48016	0.252431	0.3309
	215209	0.35	0.7	9	0.443523	0.172556	0.276645	0.246672	0.397584	0.304453	0.42635	0.279152	0.337395	0.460788	0.482044	0.449966	0.499137	0.246193	0.329744
	215209	0.35	0.8	1.2	0.580861	0.145386	0.290602	0.231268	0.403169	0.29393	0.447503	0.285531	0.348622	0.370949	0.356401	0.35374	0.378111	0.410397	0.393593
	215209	0.35	0.8	10	0.460784	0.166176	0.276715	0.253087	0.391817	0.30753	0.418543	0.287099	0.340579	0.454627	0.482032	0.446121	0.470628	0.258085	0.33336
	215209	0.35	0.8	11	0.458773	0.16684	0.276662	0.254622	0.391826	0.308663	0.420341	0.28836	0.342061	0.452672	0.475148	0.434523	0.520959	0.227555	0.316753
	215209	0.35	0.8	13	0.451483	0.167031	0.274612	0.254746	0.385914	0.306902	0.413825	0.287659	0.339396	0.447456	0.478221	0.439443	0.459932	0.247998	0.322241
	215209	0.35	0.8	15	0.448969	0.166705	0.273579	0.254053	0.383246	0.305555	0.409316	0.28529	0.33623	0.453322	0.476205	0.439341	0.497673	0.217607	0.30281
	215209	0.35	0.8	2	0.573236	0.148536	0.291799	0.234426	0.41307	0.299104	0.460756	0.291127	0.356807	0.370037	0.354866	0.351769	0.380023	0.395607	0.387658
	215209	0.35	0.8	3	0.556477	0.154392	0.293113	0.238932	0.422908	0.305349	0.470225	0.294794	0.362395	0.382999	0.363678	0.363776	0.425953	0.386609	0.405328
	215209	0.35	0.8	4	0.515334	0.159985	0.287134	0.247861	0.422725	0.312494	0.457364	0.293331	0.357426	0.469199	0.490053	0.465335	0.466429	0.338032	0.391984
	215209	0.35	0.8	5	0.496983	0.161255	0.283092	0.247981	0.411962	0.309599	0.442716	0.289832	0.350321	0.465807	0.487724	0.462143	0.450659	0.295095	0.356652
	215209	0.35	0.8	6	0.4819	0.161447	0.278929	0.249144	0.404464	0.308349	0.430756	0.284655	0.342787	0.467549	0.493891	0.465546	0.488156	0.343029	0.402923
	215209	0.35	0.8	7	0.472097	0.163003	0.277404	0.248358	0.399894	0.306414	0.426322	0.283269	0.340376	0.463768	0.485759	0.459233	0.468988	0.281455	0.351789
	215209	0.35	0.8	8	0.46665	0.163587	0.276293	0.249693	0.396299	0.30636	0.42535	0.285389	0.341589	0.461247	0.48389	0.454557	0.487435	0.269739	0.347292
	215209	0.35	0.8	9	0.462041	0.165097	0.276191	0.251867	0.394454	0.307432	0.420868	0.286565	0.340968	0.456326	0.480769	0.447132	0.481967	0.251136	0.330211
	215209	0.4	0.6	1.2	0.56184	0.157299	0.297283	0.219015	0.409138	0.285304	0.461676	0.275337	0.344951	0.37896	0.359925	0.360187	0.419119	0.389185	0.403598
	215209	0.4	0.6	10	0.43087	0.174406	0.274129	0.236823	0.395858	0.296352	0.42094	0.27089	0.329643	0.450031	0.478866	0.443944	0.445731	0.233911	0.306813
	215209	0.4	0.6	11	0.426177	0.175578	0.273546	0.23423	0.390716	0.292881	0.416283	0.269516	0.327195	0.459979	0.476111	0.438918	0.542918	0.236205	0.329191
	215209	0.4	0.6	13	0.423328	0.176289	0.273181	0.236962	0.390007	0.294805	0.416469	0.27234	0.329325	0.45281	0.477265	0.43824	0.535943	0.233667	0.325443
	215209	0.4	0.6	15	0.420814	0.177491	0.273297	0.23615	0.385303	0.292827	0.412065	0.269677	0.326002	0.452018	0.475077	0.438366	0.500002	0.217002	0.302652
	215209	0.4	0.6	2	0.556226	0.159565	0.297916	0.223638	0.416797	0.291089	0.472644	0.281641	0.35296	0.377512	0.363747	0.359548	0.414672	0.423443	0.419012
	215209	0.4	0.6	3	0.5424	0.162178	0.29659	0.230783	0.424229	0.298941	0.481273	0.287762	0.360171	0.388033	0.368006	0.367282	0.419238	0.375128	0.395958
	215209	0.4	0.6	4	0.499832	0.166886	0.288817	0.236271	0.422475	0.303057	0.464771	0.284963	0.353306	0.465923	0.491681	0.465165	0.44446	0.342408	0.386816
	215209	0.4	0.6	5	0.478046	0.169783	0.284893	0.237629	0.416855	0.302702	0.45701	0.282884	0.349458	0.468654	0.48961	0.463894	0.491573	0.308567	0.379141
	215209	0.4	0.6	6	0.461371	0.17148	0.281276	0.234527	0.408018	0.297851	0.440183	0.27385	0.337643	0.467435	0.493911	0.464758	0.473906	0.336562	0.393596
	215209	0.4	0.6	7	0.451567	0.171953	0.278655	0.236428	0.404043	0.298302	0.433835	0.272119	0.334454	0.464686	0.48781	0.459449	0.476683	0.313837	0.378487
	215209	0.4	0.6	8	0.442852	0.172793	0.276625	0.235348	0.398802	0.29601	0.429347	0.271619	0.332737	0.46259	0.483007	0.454338	0.504685	0.260951	0.344023
	215209	0.4	0.6	9	0.434054	0.173916	0.274753	0.236354	0.397691	0.296496	0.423149	0.271481	0.330757	0.453632	0.478511	0.444051	0.470599	0.22921	0.308273
	215209	0.4	0.7	1.2	0.560918	0.156975	0.296732	0.224421	0.410799	0.290267	0.463261	0.280945	0.349771	0.377813	0.363659	0.359933	0.387434	0.431068	0.408088
	215209	0.4	0.7	10	0.43816	0.172342	0.274797	0.240027	0.394654	0.298504	0.422105	0.274738	0.332839	0.458234	0.480035	0.445702	0.485588	0.254026	0.333558
	215209	0.4	0.7	11	0.433551	0.173512	0.274274	0.238021	0.389823	0.295571	0.417697	0.27348	0.330543	0.454148	0.477834	0.439697	0.523095	0.242828	0.331684
	215209	0.4	0.7	13	0.43154	0.17368	0.273769	0.242093	0.389732	0.298663	0.418644	0.277237	0.333573	0.451551	0.47623	0.437018	0.53652	0.220886	0.312936
	215209	0.4	0.7	15	0.430199	0.17381	0.273446	0.241996	0.384548	0.297055	0.413615	0.275414	0.330655	0.449994	0.476659	0.439316	0.484684	0.229064	0.3111
	215209	0.4	0.7	2	0.555639	0.159714	0.297898	0.227764	0.418192	0.294909	0.473842	0.286288	0.356926	0.378504	0.361472	0.358689	0.411861	0.410174	0.411016
	215209	0.4	0.7	3	0.542484	0.160944	0.295482	0.231365	0.421978	0.298866	0.479457	0.289083	0.360691	0.393927	0.375617	0.374564	0.486539	0.440393	0.462317
	215209	0.4	0.7	4	0.500335	0.165493	0.287753	0.237711	0.421953	0.304103	0.466856	0.286937	0.355425	0.467625	0.492667	0.464955	0.465234	0.33872	0.392023
	215209	0.4	0.7	5	0.481984	0.168818	0.28525	0.2404	0.414721	0.304368	0.457779	0.286528	0.352453	0.471737	0.496067	0.469876	0.498848	0.379614	0.431139
	215209	0.4	0.7	6	0.465728	0.170154	0.281506	0.237304	0.405387	0.299366	0.438996	0.277503	0.34005	0.465176	0.485685	0.460112	0.451595	0.283462	0.348299
	215209	0.4	0.7	7	0.453913	0.17068	0.278342	0.23884	0.401476	0.299504	0.432817	0.275172	0.336444	0.461014	0.490427	0.456863	0.466545	0.302945	0.367353
	215209	0.4	0.7	8	0.448467	0.171746	0.277529	0.238178	0.397661	0.297919	0.430998	0.274976	0.335746	0.462625	0.480267	0.451347	0.509413	0.246157	0.331923
	215209	0.4	0.7	9	0.440841	0.172284	0.27559	0.239385	0.396331	0.298485	0.424466	0.2753	0.333985	0.458496	0.478273	0.446315	0.472946	0.239083	0.317609
	215209	0.4	0.8	1.2	0.560835	0.155662	0.295467	0.227897	0.408884	0.29267	0.453949	0.285441	0.350493	0.379922	0.357894	0.359071	0.416641	0.35806	0.385136
	215209	0.4	0.8	10	0.452908	0.171346	0.278575	0.244122	0.388285	0.299772	0.413383	0.281942	0.335239	0.456653	0.480556	0.444435	0.477824	0.246106	0.32488
	215209	0.4	0.8	11	0.448467	0.172203	0.277898	0.243009	0.384707	0.297865	0.410581	0.281187	0.333783	0.446279	0.47612	0.435789	0.471897	0.223545	0.303376
	215209	0.4	0.8	13	0.445785	0.173231	0.277892	0.246195	0.382697	0.299632	0.410614	0.283849	0.335662	0.456182	0.476169	0.43742	0.512976	0.230278	0.317865
	215209	0.4	0.8	15	0.442852	0.173027	0.276813	0.246114	0.376537	0.297666	0.405153	0.282149	0.332644	0.452662	0.48655	0.446309	0.48972	0.266163	0.344883
	215209	0.4	0.8	2	0.556812	0.157873	0.296489	0.230607	0.415908	0.296703	0.462695	0.289897	0.356459	0.379419	0.360951	0.360882	0.426301	0.405853	0.415826
	215209	0.4	0.8	3	0.542735	0.159987	0.29467	0.234012	0.419845	0.300521	0.467191	0.292362	0.359656	0.389914	0.367979	0.36943	0.4362	0.361597	0.39541
	215209	0.4	0.8	4	0.511061	0.163135	0.288742	0.240384	0.416353	0.304793	0.453639	0.290592	0.354255	0.462524	0.486906	0.459068	0.4282	0.332782	0.374509
	215209	0.4	0.8	5	0.493799	0.166676	0.286888	0.242823	0.412793	0.305776	0.44855	0.290899	0.352919	0.46465	0.490225	0.46391	0.438646	0.337691	0.381605
	215209	0.4	0.8	6	0.480225	0.168277	0.284273	0.241619	0.402266	0.301902	0.430642	0.284539	0.342667	0.465018	0.487874	0.46031	0.460279	0.305363	0.367149
	215209	0.4	0.8	7	0.467907	0.168725	0.280976	0.242068	0.398437	0.301165	0.423956	0.281577	0.3384	0.464327	0.48662	0.459729	0.471671	0.291786	0.360537
	215209	0.4	0.8	8	0.463382	0.170526	0.281103	0.241964	0.393169	0.299568	0.422005	0.28161	0.337801	0.466605	0.484727	0.457002	0.514058	0.273451	0.356999
	215209	0.4	0.8	9	0.455086	0.17149	0.279361	0.243266	0.390216	0.299697	0.41533	0.281975	0.335901	0.450809	0.478442	0.444696	0.450339	0.229033	0.303641
	227165	0.2	0.6	1.2	0.60424	0.142264	0.293192	0.2081	0.377627	0.268331	0.405347	0.255773	0.31364	0.321801	0.307297	0.30546	0.338993	0.392743	0.363894
	227165	0.2	0.6	10	0.438495	0.173874	0.276121	0.244434	0.379732	0.297419	0.399292	0.270056	0.322198	0.453496	0.481283	0.445971	0.454369	0.232247	0.307379
	227165	0.2	0.6	11	0.440506	0.174083	0.27692	0.246518	0.378024	0.298425	0.39823	0.272253	0.323407	0.444909	0.477025	0.440226	0.402334	0.223154	0.287079
	227165	0.2	0.6	13	0.436987	0.173641	0.275461	0.246128	0.377732	0.298049	0.393	0.271173	0.320913	0.456952	0.47891	0.448574	0.428119	0.233709	0.30236
	227165	0.2	0.6	15	0.434138	0.172894	0.27397	0.245961	0.372177	0.296183	0.388252	0.271254	0.319376	0.463857	0.4869	0.456981	0.432463	0.236214	0.30554
	227165	0.2	0.6	2	0.582537	0.152627	0.298179	0.223457	0.423455	0.292541	0.452524	0.273993	0.341323	0.32619	0.307532	0.308199	0.433794	0.384926	0.407901
	227165	0.2	0.6	3	0.543992	0.162024	0.296883	0.235907	0.431466	0.305034	0.460939	0.283075	0.350747	0.431441	0.411753	0.410402	0.444767	0.429813	0.437162
	227165	0.2	0.6	4	0.505028	0.168814	0.291986	0.23982	0.417317	0.304597	0.44422	0.278544	0.342393	0.465344	0.487264	0.461918	0.438381	0.318119	0.368691
	227165	0.2	0.6	5	0.4757	0.173193	0.287033	0.242495	0.401334	0.302321	0.433048	0.277502	0.33825	0.469406	0.492423	0.46538	0.476879	0.309891	0.375664
	227165	0.2	0.6	6	0.463214	0.172893	0.282996	0.24014	0.39224	0.297899	0.417511	0.270446	0.32826	0.467609	0.485483	0.461233	0.477475	0.26944	0.344486
	227165	0.2	0.6	7	0.451483	0.175845	0.281764	0.238725	0.386184	0.295057	0.411421	0.269001	0.325306	0.471757	0.488603	0.463342	0.507664	0.275821	0.35744
	227165	0.2	0.6	8	0.440841	0.175161	0.277882	0.238449	0.381321	0.293417	0.403559	0.266306	0.320871	0.463921	0.486253	0.457402	0.450842	0.258629	0.328698
	227165	0.2	0.6	9	0.437908	0.174001	0.276037	0.242284	0.380983	0.296201	0.40249	0.268553	0.322155	0.462249	0.485253	0.451023	0.462115	0.2495	0.324045
	227165	0.2	0.7	1.2	0.603821	0.141479	0.29228	0.213348	0.384263	0.274365	0.409605	0.261607	0.31929	0.321513	0.310143	0.306788	0.327283	0.433491	0.372974
	227165	0.2	0.7	10	0.44369	0.171375	0.275748	0.24933	0.378673	0.300682	0.399104	0.274627	0.325366	0.453241	0.48098	0.44652	0.451329	0.249394	0.321265
	227165	0.2	0.7	11	0.44545	0.171533	0.276423	0.250622	0.378064	0.301426	0.399389	0.276328	0.326652	0.450316	0.479232	0.444189	0.433225	0.232852	0.3029
	227165	0.2	0.7	13	0.440171	0.17167	0.274889	0.2501	0.376707	0.300617	0.392756	0.27465	0.323253	0.45728	0.480989	0.450798	0.440397	0.242477	0.312755
	227165	0.2	0.7	15	0.436568	0.170546	0.272864	0.249655	0.372473	0.298941	0.388735	0.274761	0.321959	0.46247	0.481134	0.453022	0.443484	0.225719	0.299171
	227165	0.2	0.7	2	0.583208	0.150486	0.296251	0.227291	0.421605	0.295354	0.4527	0.278266	0.34467	0.324514	0.311413	0.309799	0.402276	0.439835	0.420218
	227165	0.2	0.7	3	0.547344	0.159574	0.295537	0.238279	0.430081	0.306658	0.460667	0.285893	0.352822	0.431199	0.407586	0.408797	0.426814	0.35987	0.390494
	227165	0.2	0.7	4	0.504692	0.166239	0.289654	0.243833	0.420825	0.308764	0.448073	0.28383	0.347523	0.471574	0.493318	0.467921	0.479878	0.360888	0.411963
	227165	0.2	0.7	5	0.478884	0.170506	0.285749	0.247182	0.403055	0.306436	0.43553	0.282677	0.342838	0.467	0.493065	0.465619	0.461264	0.330441	0.385044
	227165	0.2	0.7	6	0.466063	0.172097	0.28321	0.243168	0.392564	0.300312	0.419166	0.273466	0.330992	0.466729	0.486492	0.461148	0.460836	0.267129	0.338211
	227165	0.2	0.7	7	0.456008	0.172209	0.28023	0.243616	0.386289	0.298795	0.411552	0.273865	0.328879	0.466362	0.48622	0.460855	0.465397	0.269484	0.341326
	227165	0.2	0.7	8	0.447126	0.172191	0.277473	0.243999	0.380796	0.297422	0.403737	0.271588	0.324733	0.461835	0.483319	0.454726	0.438822	0.232662	0.304094
	227165	0.2	0.7	9	0.442098	0.17155	0.275394	0.244891	0.379915	0.297813	0.402232	0.271479	0.324167	0.458535	0.481936	0.450417	0.439429	0.228486	0.300648
	227165	0.2	0.8	1.2	0.603318	0.134794	0.285173	0.216039	0.382766	0.276192	0.404737	0.264879	0.320202	0.321691	0.309149	0.306786	0.344216	0.428968	0.381947
	227165	0.2	0.8	10	0.449388	0.165147	0.272424	0.25337	0.376941	0.303043	0.395709	0.279211	0.327406	0.451481	0.477092	0.442945	0.434046	0.220943	0.292828
	227165	0.2	0.8	11	0.449053	0.164908	0.272125	0.254609	0.376433	0.303762	0.395519	0.280502	0.328226	0.451187	0.478454	0.44396	0.416488	0.227609	0.294354
	227165	0.2	0.8	13	0.444025	0.165609	0.271173	0.254363	0.374592	0.302986	0.389519	0.27924	0.325287	0.458562	0.478573	0.448587	0.439265	0.215916	0.289521
	227165	0.2	0.8	15	0.439752	0.164647	0.26908	0.253252	0.370534	0.300868	0.385384	0.278751	0.323507	0.461493	0.482449	0.454086	0.415649	0.220279	0.287953
	227165	0.2	0.8	2	0.585219	0.142674	0.288956	0.229954	0.418174	0.296734	0.445896	0.281194	0.34489	0.322067	0.308786	0.30652	0.364106	0.408256	0.384919
	227165	0.2	0.8	3	0.550025	0.151896	0.289045	0.240332	0.426489	0.307426	0.450411	0.288308	0.351574	0.427436	0.407934	0.406132	0.40212	0.365903	0.383157
	227165	0.2	0.8	4	0.509134	0.158079	0.283696	0.246414	0.418327	0.310141	0.441514	0.287049	0.347908	0.469735	0.492787	0.467048	0.454493	0.348234	0.394331
	227165	0.2	0.8	5	0.484749	0.163159	0.281232	0.249578	0.399074	0.307098	0.427628	0.285518	0.342414	0.465093	0.49114	0.464641	0.421985	0.317942	0.362649
	227165	0.2	0.8	6	0.471929	0.164962	0.279017	0.248272	0.390217	0.303466	0.413308	0.278548	0.332804	0.467265	0.490419	0.465064	0.44945	0.311041	0.36765
	227165	0.2	0.8	7	0.461371	0.165282	0.276145	0.249183	0.382754	0.301852	0.404624	0.279393	0.330545	0.462352	0.48391	0.457911	0.420069	0.250014	0.313463
	227165	0.2	0.8	8	0.451986	0.164729	0.272865	0.248483	0.379584	0.300351	0.399098	0.276426	0.326624	0.45895	0.483834	0.452937	0.408003	0.262162	0.319214
	227165	0.2	0.8	9	0.448131	0.164334	0.271373	0.249335	0.378313	0.300572	0.398313	0.276676	0.326535	0.456305	0.482875	0.450857	0.42397	0.244551	0.310184
	227165	0.25	0.6	1.2	0.598542	0.144673	0.294267	0.21567	0.385537	0.276606	0.418154	0.265031	0.324432	0.363628	0.353314	0.347717	0.349171	0.458399	0.396398
	227165	0.25	0.6	10	0.437573	0.172404	0.274663	0.242296	0.38967	0.298799	0.411387	0.27123	0.32692	0.457305	0.477712	0.442629	0.477916	0.221388	0.302601
	227165	0.25	0.6	11	0.438746	0.172323	0.274966	0.244247	0.389375	0.30019	0.411906	0.273968	0.329067	0.453583	0.480337	0.443497	0.483843	0.236287	0.317514
	227165	0.25	0.6	13	0.434054	0.172282	0.273459	0.243973	0.38563	0.298865	0.405814	0.272508	0.326062	0.457851	0.477665	0.443028	0.490837	0.22363	0.307267
	227165	0.25	0.6	15	0.433048	0.170595	0.271801	0.247275	0.381473	0.300052	0.402516	0.274417	0.326346	0.45618	0.477455	0.442313	0.487162	0.222717	0.305684
	227165	0.25	0.6	2	0.58061	0.153098	0.298145	0.227109	0.420364	0.294896	0.456722	0.279411	0.346712	0.367838	0.350318	0.350131	0.432051	0.411355	0.421449
	227165	0.25	0.6	3	0.541143	0.16088	0.295058	0.233436	0.430833	0.302805	0.466675	0.281656	0.351293	0.380861	0.362049	0.361666	0.432441	0.369336	0.398405
[truncated: 5,609 more rows]
