# Supplementary material for: Identification of Protein Complexes by Integrating Protein Abundance and Interaction Features Using a Deep Learning Strategy
Source: Int J Mol Sci. 2023 Apr 26;24(9):7884. doi: 10.3390/ijms24097884 (PMC10178578; doi:10.3390/ijms24097884)
Supplement: Supplementary file 1 [file ijms-24-07884-s001.zip › Table S4.txt]

List of predicted protein complexes
1 "CCNT1 FGR"
2 "CDC73 CTR9 LEO1 PAF1 PPP1R10 RPRD2 RTF1 SUPT5H SUPT6H TOX4 VEZF1"
3 "AFF3 CCNT2 CDK9 HEXIM2"
4 "SKIV2L TTC37 WDR61"
5 "CHD2 IWS1"
6 "HEXIM1 NSMAF"
7 "BUB3 BUD13 CDC73 CDKN2AIP CSTF3 DDX3X DHX15 DHX16 DHX9 EFTUD2 GTF2F2 HNRNPH3 HTATSF1 KHSRP LSM2 LSM3 LSM4 NCBP1 NUDT21 NUFIP2 PPIL2 PPIL3 PPM1G PRPF19 PSPC1 RALY RBM39 SKIV2L2 SNRNP200 SNRPA SNRPC SNRPE SYMPK TXNL4A ZNF207"
8 "SMNDC1 ZMAT2"
9 "ADAR AKAP17A CAAP1 FYTTD1 MAGOHB THOC1 THOC3 THOC5 THOC7 ZFC3H1"
10 "CD2BP2 PHF5A PRPF31 PRPF6 SF3B5 SMU1 SNRPB SNRPD1 TRAP1 USP39 XRN2"
11 "CMAS CTNNBL1 GPATCH11 IK MFAP1 PPIL4 PRPF3 PRPF38A PSIP1 RBM10 RBM25 SART1 SCAF4 SF3A1 SF3A2 SF3A3 SF3B3 SF3B6 TCERG1 WBP11 WDR18"
12 "DDX42 SNRPA1"
13 "GPKOW SNRPD2"
14 "CFAP20 DDX41 PQBP1 PRPF8"
15 "AQR BCAS2 BUD31 CACTIN CCDC12 CDC40 CDC5L CRNKL1 CWC15 DDX23 DGCR14 DHX35 DHX8 FRG1 GPATCH1 HNRNPA2B1 HNRNPA3 HNRNPR ISY1 LSM8 PAXBP1 PLRG1 PNN PPIE PPWD1 PRPF4 RBM15B RBM22 RSRC1 SLU7 SNRNP40 SNW1 SYF2 TFIP11 TOE1 WDR83 XAB2 ZCCHC8 ZFR ZNF830"
16 "C9orf78 DDX5 KHDRBS1 LSM14A NONO NSUN2 SFPQ SSRP1"
17 "LSM5 LSM7"
18 "APOBEC3B CCAR2 DDX17 DIDO1 FAM208B PDS5A RBM15 RBM3 RBMXL1 SUGP1 THOC6 USP7 ZC3H11A"
19 "LSM6 STRBP"
20 "ATXN2L CWC27 HNRNPK PABPC1 PHF6 SFSWAP SYNCRIP TMPO U2AF1"
21 "BZW1 C19orf43 CHERP CIRBP DEK DYNC1H1 GCN1 HSPD1 PCNP PGAM5 RBM17 RBM4 RBM5 SCAF8 SF3B1 SF3B2 SF3B4 SRP68 U2SURP"
22 "FUBP1 PPIH WDR82"
23 "DNAJC8 HMGB2"
24 "CETN2 CWF19L2 G3BP2 SNRPD3 SNRPF SNRPG"
25 "EIF4A3 FAM50A FXR1 MAGOH"
26 "DDX39A DDX39B SARNP THOC2"
27 "ACIN1 ARGLU1 ARL6IP4 BCLAF1 BMS1 C1orf35 CCDC9 CDK12 CHTOP CLASRP CLK2 CLK3 CPSF6 CWC22 DDX46 DNAJC9 ENY2 ERH GPATCH8 HNRNPC HNRNPUL2 IGF2BP3 KIAA1429 LARP7 LUC7L LUC7L3 MEPCE MOV10 NCBP2 NCOA5 NKAP NKTR PABPN1 PHF10 POLDIP3 PPHLN1 PPIG PRPF38B PRPF40A PRPF4B PUF60 RBBP6 RBM12B RBM26 RBM27 RBM8A RBMX2 RNPS1 RSRC2 SAFB SAFB2 SCAF11 SDE2 SETD2 SF1 SLTM SNIP1 SNRNP27 SNRNP70 SPEN SREK1 SRPK2 SRRM1 SRRM2 SRRT SRSF1 SRSF10 SRSF11 SRSF2 SRSF3 SRSF4 SRSF5 SRSF6 SRSF7 SRSF8 SRSF9 THRAP3 TRA2A TRA2B U2AF2 WDR33 WTAP YTHDC1 ZC3H13 ZC3H14 ZC3H4 ZNF326 ZNF638 ZRANB2"
28 "DNAJA1 SNRPB2"
29 "DHX38 RBM42 SART3 TCEA1 TPR"
30 "PPIL1 TIAL1"
31 "DDX1 ELAVL1 EWSR1 FUS HNRNPF HNRNPH1 HNRNPL HNRNPM RBMX TARDBP"
32 "CSTF1 CSTF2"
33 "BRD2 BRD3 HNRNPH2"
34 "FEN1 RECQL"
35 "RCC2 THUMPD1"
36 "AKAP8 AKAP8L FUBP3"
37 "DGCR8 HNRNPDL HNRNPUL1 TAF15"
38 "MRPL20 MRPL43 POU4F3 SLC25A10 TMEM92 ZSWIM8"
39 "DAP3 DDX28 ERAL1 FARS2 FASTKD2 GADD45GIP1 GTPBP10 LACTB MALSU1 MARS2 MCAT METTL17 MRPL1 MRPL10 MRPL11 MRPL12 MRPL13 MRPL14 MRPL15 MRPL16 MRPL17 MRPL18 MRPL19 MRPL2 MRPL21 MRPL22 MRPL23 MRPL24 MRPL27 MRPL28 MRPL3 MRPL30 MRPL32 MRPL33 MRPL34 MRPL35 MRPL37 MRPL38 MRPL39 MRPL4 MRPL40 MRPL41 MRPL42 MRPL44 MRPL45 MRPL46 MRPL47 MRPL48 MRPL49 MRPL50 MRPL51 MRPL52 MRPL53 MRPL54 MRPL55 MRPL57 MRPL9 MRPS10 MRPS11 MRPS12 MRPS14 MRPS15 MRPS16 MRPS17 MRPS18A MRPS18B MRPS18C MRPS2 MRPS22 MRPS23 MRPS24 MRPS25 MRPS26 MRPS27 MRPS28 MRPS30 MRPS31 MRPS33 MRPS34 MRPS35 MRPS5 MRPS6 MRPS7 MRPS9 MTERF3 NGRN NOA1 PCMTD1 PTCD1 PTCD3 RBMS1 RPUSD3 RPUSD4 RTN4IP1 SLIRP SUPV3L1 TEFM TIMM23 TRUB2 YARS2"
40 "ITSN1 NEDD8"
41 "ARFIP1 ARFIP2"
42 "DPH7 ENOX1 MAP3K1 MIS12 MSL2 MYNN SEC22A SUCO TYW3 ZBTB38"
43 "RNF10 RNF25"
44 "MKL2 TJAP1"
45 "DUS3L LRRC41 PWP2"
46 "IMP3 MPHOSPH10 NOL10 UTP3"
47 "UTP15 WDR3 WDR36"
48 "WDR43 WDR75"
49 "EIF2S2 EIF5 FARSB LRRC47"
50 "DHX29 FOCAD"
51 "ATG2A CSDE1 DROSHA EWSR1"
52 "C14orf166 FAM98A"
53 "DDX1 DGCR8 FUS HNRNPDL HNRNPUL1 TAF15 TARDBP"
54 "DHX29 GTPBP1"
55 "CCNC CDK19 CDK8 MED1 MED10 MED11 MED12 MED12L MED13 MED13L MED14 MED15 MED16 MED17 MED18 MED19 MED20 MED21 MED22 MED23 MED24 MED25 MED26 MED27 MED28 MED29 MED30 MED31 MED4 MED6 MED7 MED8 MED9 MTBP ZNF131"
56 "EIF2S2 MAP1B PDCD11 YBX3"
57 "ACTA2 ATP5C1 BAG2 BRIX1 CEBPZ DDX18 DDX21 DDX54 DHX30 DHX9 DICER1 DKC1 EBNA1BP2 EEF1A1 EEF1B2 EEF1D EEF1G EEF2 EIF2S1 EIF2S3 EIF6 FAU FBL FTSJ3 G3BP1 GNL2 GNL3 GTPBP4 H1FX HIST1H1C HIST1H1D HIST1H1E HIST1H2BD HIST1H2BM HNRNPA0 HNRNPA1 HNRNPAB HNRNPD HP1BP3 IGF2BP1 ILF3 KNOP1 LARP1 LYAR MRTO4 MYBBP1A NAP1L1 NAT10 NCL NIFK NKRF NOC2L NOLC1 NOP10 NOP16 NOP2 NOP56 NOP58 NPM1 POP1 PWP1 RBM28 RBM34 RPL10 RPL10A RPL10L RPL11 RPL12 RPL13 RPL13A RPL14 RPL15 RPL17 RPL18 RPL18A RPL19 RPL21 RPL22 RPL23 RPL23A RPL24 RPL26 RPL27 RPL27A RPL28 RPL29 RPL3 RPL30 RPL31 RPL32 RPL34 RPL35 RPL35A RPL36 RPL36A RPL36AL RPL37 RPL37A RPL38 RPL39 RPL3L RPL4 RPL5 RPL6 RPL7 RPL7A RPL8 RPL9 RPLP0 RPLP1 RPLP2 RPS10 RPS11 RPS12 RPS14 RPS15 RPS15A RPS16 RPS17 RPS18 RPS19 RPS2 RPS20 RPS21 RPS23 RPS24 RPS25 RPS26 RPS27 RPS27A RPS27L RPS28 RPS29 RPS3 RPS3A RPS4X RPS5 RPS6 RPS7 RPS9 RPSA RRBP1 RRP12 RRP15 RRP1B RRS1 RSL1D1 RSL24D1 SERBP1 SLC25A3 SLC25A5 SLC25A6 SRP14 SRP72 SRP9 SRPK1 SSB TCOF1 TOP1 TSR1 TUBA1A TUFM U2AF1 UBA52 UPF1 YBX1 ZC3HAV1"
58 "BYSL C19orf53 DIMT1 ELAVL1 HNRNPL HNRNPM HNRNPU ILF2 PA2G4 RTCB SND1"
59 "FAU RPL3L SLCO4C1"
60 "KIAA1324L NACA2 NXF5"
61 "FAM184B OR8H3 TUBA3C"
62 "CCDC85B CNST MDM1 SMR3A VMAC"
63 "MAGEA4 TSPYL4"
64 "L3HYPDH RPL22L1"
65 "AGO2 DICER1 EIF6 RSL24D1 TARBP2"
66 "KDM5D MAP10 MARCKSL1"
67 "ANP32B ARIH1"
68 "CPSF1 CPSF2 CPSF3 CPSF4 FIP1L1"
69 "CBLL1 KIAA1429 ZC3H13 ZNF645"
70 "IER5 PPP2R2C ZNF114"
71 "SESN3 ZFP1"
72 "BNIP1 FRMD5 OPTN SLC27A1 TBC1D17"
73 "NBAS SCFD2 STX18 USE1"
74 "KNTC1 RINT1 SCFD1 ZW10"
75 "FBXO7 POMP PSMB9 PSME1 PSME2 PSME4 PSMF1 PSMG1 PSMG2 PSMG3 PSMG4 RNF181"
76 "ADRM1 PAAF1 PSMA1 PSMA2 PSMA3 PSMA4 PSMA5 PSMA6 PSMA7 PSMA8 PSMB1 PSMB2 PSMB3 PSMB4 PSMB5 PSMB6 PSMB7 PSMC1 PSMC2 PSMC3 PSMC4 PSMC5 PSMC6 PSMD1 PSMD10 PSMD11 PSMD12 PSMD13 PSMD14 PSMD2 PSMD3 PSMD4 PSMD6 PSMD7 PSMD8 UBE3A"
77 "BRAF SFN YWHAB YWHAE YWHAG YWHAH YWHAQ YWHAZ"
78 "LRRC41 QKI TEC"
79 "CLNS1A COPRS PRMT5 RIOK1 WDR77"
80 "ART3 MSH6 SNRPE UTP18"
81 "MSH2 PRKCZ"
82 "CWC25 DDX41"
83 "C1orf131 INTS1 INTS10 INTS12 INTS3 INTS5 INTS6 INTS9"
84 "DHX40 HELLS"
85 "GBA PSMB8"
86 "ELP4 ELP5 ELP6 ZBTB25 ZNF639"
87 "CSTF1 CSTF2 CSTF3"
88 "CSTF2T PAPOLB"
89 "BRD2 DUSP11 HNRNPA1L2 HNRNPH3 UBR5"
90 "CDKL1 WNK3"
91 "AIMP1 AIMP2 DARS EEF1E1 EPRS IARS KARS LARS MARS QARS RARS"
92 "AAAS CYTH1 GLE1 NDC1 NUP107 NUP133 NUP153 NUP155 NUP160 NUP188 NUP205 NUP210 NUP214 NUP43 NUP62 NUP85 NUP88 NUP93 NXF1 RAE1 RANBP2 RANGAP1 RGPD8 SMPD4 SUMO1 TMEM209 TMEM214 UBE2I"
93 "KIFC1 KPNB1 NUP50 RAN RCC1"
94 "KPNA1 KPNA3 KPNA4 KPNA6"
95 "CDCA2 ELK4 NUP35 NUPL2 RGPD6 SEH1L"
96 "NXT1 NXT2 SENP1 SENP2 SUMO2"
97 "NEIL3 SMARCB1 TBL1XR1"
98 "SMARCA4 SMARCC1 SMARCC2"
99 "ARID1A ARID1B ARID2 BCL7A BCL7B BCL7C BRD7 DPF1 DPF2 DPF3 GATAD2B PBRM1 SMARCA2 SMARCD1 SMARCD2 SMARCD3 SMARCE1 SS18L1 TOP2B"
100 "DCLK2 SS18"
101 "TRIM33 ZBTB33"
102 "EMD LMNB1 TRIM28"
103 "ACTL6B CHRNG"
104 "NONO PRKDC SFPQ"
105 "ELAVL1 HNRNPL RBMX"
106 "CAPRIN1 G3BP2"
107 "CPSF7 PTBP1"
108 "ACTR10 ACTR1A ACTR1B DCTN1 DCTN2 DCTN3 DCTN4 DCTN5 DCTN6"
109 "ANXA2 CAP1 CFL1 G6PD GDI2 PFKM PLOD1"
110 "ACTG1 CAPZA1 CAPZA2 DCTN2"
111 "ACTA1 ACTB ACTN4 ACTR2 ACTR3 ARPC1A ARPC1B ARPC2 ARPC3 ARPC4 ARPC5 BASP1 CLIC1 CORO1C CTTN PPP1CA TPM4 WDR1"
112 "CDC42 IQGAP1"
113 "MSN RDX"
114 "ABCB5 BOP1 CEBPZ DDX10 DDX27 DHX37 DNTTIP2 IMP3 MAK16 MPHOSPH10 PDCD11 RBMS1 RPS19BP1 RRP9 SRSF10 UTP14A UTP15 UTP18 UTP3"
115 "CENPV DDX24 DDX50 DDX54 DDX55 DHX33 DIMT1 EBNA1BP2 GNL3 GTPBP4 HERC5 NOC2L NOC3L NOP2 PES1 RRP12 YTHDC2"
116 "BMS1 C1orf35 C7orf50 CASC3 CCDC86 CDSN CTCF DHX30 DHX36 DKC1 FTSJ3 GAR1 GNL2 HIST1H1A KNOP1 KRR1 LARP1B LARP7 LIN28B MOV10 MRTO4 NIFK NIP7 NKRF NOC4L NOP16 PABPC4 POP1 PRKRA PURA RBM28 RBM34 RPL26L1 RRP1B RRS1 STAU1 STAU2 SURF6 THAP7 WDR12 ZC3HAV1 ZCCHC3 ZNF22 ZNF808"
117 "PWP2 WDR3 WDR36"
118 "ABT1 BUD13 C12orf43 C8orf33 CCDC137 CCDC59 DDX31 DDX51 DDX52 DDX56 DHX57 FYTTD1 GZF1 HIST2H2AB IMP4 KRI1 LLPH MEPCE MKRN2 NHP2 NLE1 NMNAT1 NOL10 NOL12 NOL7 NSA2 NVL PAIP2 PAK1IP1 PAPD5 POP7 RBM19 RBMX2 REXO4 RPF1 RPF2 RPP25 RPP40 RRP15 RRP8 RSBN1 RSBN1L SCAF1 SDAD1 SPTY2D1 SREK1 SURF2 TARBP2 TOE1 TTF1 USP36 UTP23 ZBTB11 ZBTB24 ZC3H8 ZCCHC7 ZCCHC9 ZCRB1 ZFP62 ZKSCAN8 ZNF48 ZNF512 ZNF574 ZNF629 ZNF668 ZNF768 ZNF770"
119 "AATF RPL7L1"
120 "GLYR1 ZNF800"
121 "MYEF2 PRR11 RBM4B TUBA8 YBX2 ZC3H10 ZNF189 ZNF526 ZNF689 ZNF70 ZNF771 ZSCAN25"
122 "DYNC1LI1 DYNC1LI2 DYNLRB1 DYNLT1"
123 "EIF5A PRDX4 TUBB2B"
124 "ACLY CCT2 CCT3 CCT4 CCT5 CCT6A CCT6B CCT7 CCT8 ESYT1 TCP1 TXNDC9 VCP"
125 "HGH1 MLST8 PDCL PDCL3"
126 "ERICH3 MSH4 TUBA3E UNC50"
127 "FOXK1 PRKDC TERF2"
128 "CCDC94 PLRG1 SFPQ"
129 "TERF2IP WRN XRCC5 XRCC6"
130 "RPA1 RPA2 RPA3 TP53BP1 UNC45A"
131 "DNTTIP1 ELMSAN1"
132 "ATP6V1A ATP6V1B2"
133 "AIPL1 ATP6V1B1 ATP6V1C2 ATP6V1E2 ATP6V1G2 MAGEA2 SYT5"
134 "ATP6V1G1 LANCL2"
135 "PRPF38B RSRC2 SCAF11 SCAF8 SDE2 SNRPE SRSF2"
136 "MSH2 MSH6 PRKCZ"
137 "CACTIN CXorf56"
138 "HSF1 HSF2"
139 "CDC42BPA FNBP1L LURAP1L"
140 "TTBK2 URM1"
141 "C16orf62 CCDC22 CCDC93 COMMD1 COMMD10 COMMD2 COMMD3 COMMD5 COMMD6 COMMD7 COMMD8 COMMD9 DSCR3 FAM45A OAS3 RANBP1"
142 "ATG7 DPP9 RAB9B RABGGTA RWDD2A"
143 "FCGR2A FCGR2B"
144 "C14orf166 DDX3X FRG1 PPWD1 PSPC1 ZCCHC8"
145 "APOBEC3B BRD2 HNRNPH3 UBR5 YLPM1"
146 "SKIV2L2 TMPO"
147 "HNRNPR PNN"
148 "KHSRP PPIL1"
149 "HNRNPA0 HNRNPA1 HNRNPA2B1 HNRNPA3 HNRNPAB SYNCRIP"
150 "CWC27 ELAVL1 FUS HNRNPF HNRNPH1 HNRNPL HNRNPM LSM3 RALY RBMX TARDBP"
151 "CSTF3 HNRNPA1L2 HNRNPH2 PLOD3"
152 "FUBP1 PPIL3 WDR82"
153 "AKAP8L HNRNPK"
154 "DDX1 DGCR8 DROSHA EWSR1 FAM98A HNRNPDL HNRNPUL1 TAF15"
155 "FASTK RUSC1 ZSWIM6"
156 "EYA1 EYA4 SIX1"
157 "MYH1 MYH3 MYH4 MYH7 MYL4"
158 "CYP2C18 TMEM260"
159 "DDX49 DHX29 FOCAD NOB1"
160 "PDCD2L PRMT3"
161 "AVEN ZC3H7A"
162 "EEFSEC GTPBP1"
163 "EIF3A EIF3B EIF3C EIF3CL EIF3D EIF3E EIF3F EIF3G EIF3H EIF3I EIF3J EIF3K EIF3L EIF3M"
164 "KIF4A NCAPD2 NCAPD3 NCAPG NCAPG2 NCAPH NCAPH2 SMC2 SMC4"
165 "RIOK2 TSR2"
166 "BAZ1A CHRAC1 POLE3"
167 "AKR1B10 TOMM20"
168 "MRPS34 TFB1M TJP3"
169 "SLC35F6 TIMM23 TMEM126A"
170 "AKR1D1 CRIP1 SOD2"
171 "IFI16 TRIP12"
172 "ATL3 HIST1H1B"
173 "EEF1D ELOVL5 HIST1H2BM HIST1H2BN"
174 "SPIN1 SPIN2B SPIN4 TOPORS"
175 "KIAA1191 YRDC"
176 "C11orf84 SPIN3"
177 "RSAD2 SCNM1"
178 "ILK LIMS1 PARVB RSU1"
179 "CSTF3 FEN1 PPIL1 PPP1R8 RECQL"
180 "FUBP1 FUBP3 PPIH PPIL3 WDR82"
181 "CDKN2AIP HNRNPH2 MCM4"
182 "PPP1R10 TOX4"
183 "BZW1 GCN1 NONO SNRPA"
184 "GCLC GCLM"
185 "PAFAH1B1 PAFAH1B2 PAFAH1B3"
186 "RPA3 TERF2IP"
187 "LSM5 LSM6"
188 "LIG4 PRKDC WRN XRCC4 XRCC5 XRCC6"
189 "RPA1 RPA2 TP53BP1 UNC45A"
190 "ACD DCLRE1B KANSL2 POT1 TERF1 TERF2 TINF2"
191 "BRWD3 TET2"
192 "ATXN2 EEFSEC GTPBP10 LARP4B SPATA5 TJP3 YTHDF1 ZNF622"
193 "PELO PPM1G"
194 "EIF1AX EMG1 MPG"
195 "NUFIP2 TCF25"
196 "DDX47 PTMA TRMT112"
197 "LARP4 MTPAP"
198 "AVEN NOB1 ZC3H7A"
199 "SPATA5L1 TMA16"
200 "HADHA HADHB"
201 "LRPPRC SLIRP"
202 "CSDC2 RAC1"
203 "PABPC1L PAIP1 RALYL"
204 "CAPRIN1 PTBP1"
205 "DONSON LSM5 THUMPD2"
206 "LSM7 METAP1 RBM42 THUMPD1"
207 "C1D DIS3 DIS3L EXOSC1 EXOSC10 EXOSC2 EXOSC3 EXOSC4 EXOSC5 EXOSC6 EXOSC7 EXOSC8 EXOSC9 MPHOSPH6"
208 "BYSL CSNK1D TRMT112"
209 "IGF2BP1 LTV1"
210 "CSNK1E NOB1"
211 "PNO1 UTP14C"
212 "C12orf43 DDX47 EIF1AX EMG1 MPG MUS81 NPM3 ZNF622"
213 "AAMP AVEN TCF25 ZC3H7A"
214 "IPO7 TNPO1"
215 "LRRC41 PWP2"
216 "CHRAC1 RIOK2 TSR2"
217 "C19orf43 HMGA1 HTATSF1 PHF5A SF3B5 TRAP1"
218 "DDX42 SF3A2"
219 "ATXN2L CIRBP DEK DNAJC8 ZNF207"
220 "CHERP MFAP1 PCNP PRPF38A RBM17"
221 "DDX52 RBM5"
222 "CCDC124 FKBP5 PPIL4"
223 "BPTF SART3 TPR"
224 "CAPRIN1 G3BP2 PTBP1"
225 "CDCA5 RAD21 SMC1A SMC1B SMC3 STAG1 STAG2"
226 "MAU2 NIPBL"
227 "CD3EAP POLR1B POLR1D"
228 "FAN1 ZNRD1"
229 "RRN3 TWISTNB"
230 "BRSK1 CCNT1 NOS3"
231 "CDC73 CTR9 LEO1 PAF1 PPP1R10 RTF1 SUPT5H SUPT6H TOX4"
232 "POLR2D RPRD2 RRP7A VEZF1"
233 "PHF3 REXO1 RPRD1B SUPT4H1"
234 "CTDP1 GPN1 MED26 POLR2A POLR2B POLR2C POLR2G POLR2H POLR2J POLR2L POLR3GL SETX"
235 "RECQL5 UTP11"
236 "BIN1 DXO GPN2 POLR2I POLR2K POLR2M RPAP2 RPRD1A SERGEF SSNA1"
237 "IL15RA POLR2J2"
238 "DRG2 NT5C2"
239 "TIPRL VCPIP1"
240 "AIP DTD1 NANS UBE2V2"
241 "BPNT1 CHORDC1 CSTB FAM49B LTA4H PLS3 SNX3 UFC1"
242 "SH3BGRL STMN1"
243 "HPRT1 PDCD6 PPA1"
244 "TXNDC17 UBE2K UBE2N UBE2V1"
245 "ACAT2 HEBP2 OXSR1"
246 "ADSL GMPS PAICS"
247 "ATIC GLO1"
248 "ACP1 CAB39"
249 "PTPN11 UBE2M"
250 "AATF DDX10 DNTTIP2 IMP3 MAK16 RPS19BP1 RRP9 UTP14A"
251 "IMP4 MPHOSPH10 NOL10 UTP3"
252 "UTP15 WDR36"
253 "PWP2 WDR3"
254 "GRSF1 NMNAT1"
255 "DARS2 FAM136A FDXR GFM1 GRPEL1 HSDL2 IARS2 ISCU MCEE NADK2 NIPSNAP3A PDK1 PMPCA SIRT4 TRMT10C"
256 "ARHGEF26 BCKDK CLPP CLPX DECR1 DHTKD1 FAHD1 GLS MCCC1 PDPR PNPT1 SIRT3"
257 "EPB41 MCCC2"
258 "ACSF2 ACSS1 ALDH5A1 BCAT2 C8orf82 GLRX5 IVD MECR NLN PCCB PITRM1 PREPL SARS2"
259 "ACSF3 ALAS1 ATPAF1 ATPAF2 CARS2 CDK5RAP1 GRPEL2 HSD17B8 IBA57 ISCA1 KIAA0391 LYRM2 LYRM4 LYRM7 MCFD2 MGME1 MMAB MOCS1 MTG2 MTIF2 NARS2 NDUFAF5 NDUFAF7 NFS1 NFU1 NUDT19 OXLD1 OXSM PDSS2 POLG POLG2 TRMT2B TRMT61B TSFM UQCC1 UQCC2"
260 "AARS2 GFM2"
261 "AK4 MACROD1 SPRYD4"
262 "AUH ECHDC2 MIPEP"
263 "DHRS4L2 LARS2 TBRG4 TMLHE"
264 "CPT2 MUT"
265 "ABHD10 PPA2"
266 "SAMD11 SAMD7"
267 "CTTNBP2NL FGFR1OP2 MOB4 PPP2CB SIKE1 SLMAP STRIP1 STRIP2 STRN STRN3 STRN4"
268 "C4orf19 STK24"
269 "PDCD10 STK26"
270 "FRMD6 ZBTB2 ZBTB25 ZNF639"
271 "ELP4 ELP5 ELP6"
272 "NPLOC4 UFD1"
273 "RAD23B UBQLN1 UBQLN2"
274 "ABCA7 DYSF INSRR"
275 "GPRIN1 HNRNPAB HNRNPD"
276 "KIF1B XRN1"
277 "CCNL1 CRTAP P3H1"
278 "KTN1 MTHFD1 STK10"
279 "EEF1D EEF1G VARS"
280 "EEF1B2 REEP5"
281 "ABCE1 AHSA1 FARSB PRPS1"
282 "GARS IDE"
283 "FDPS PFAS"
284 "DDOST RPN1 RPN2 STT3A STT3B"
285 "COX15 OSBPL10 PXMP2"
286 "ICMT MTFP1 ROMO1 SFXN4 TIMMDC1 TMEM223 YME1L1"
287 "NDUFA3 SLC25A46 TMEM126A"
288 "COMTD1 EXOG GLCE GNPAT HIGD2A LETMD1 MARC2 MOSPD2 MUL1 PDCD4 PEX19 PEX3 QPCTL SCO1"
289 "DNAJC19 TMEM177"
290 "C19orf70 COQ7 HIGD1A"
291 "EIF4E EIF4G1 EIF4G2"
292 "CCDC94 IKZF3 IKZF4 SETMAR TRIM62"
293 "GTPBP10 MRM1 PCBP4 TFB1M"
294 "MTERF4 SGK3"
295 "NSUN4 TEFM"
296 "APOBEC3C PIP5K1A PIP5K1C"
297 "KTN1 TMCO1"
298 "EEF1A1 EEF1B2 EEF1D EEF1G VARS"
299 "MKI67 NPM1"
300 "ELOVL5 HIST1H2BM HIST1H2BN"
301 "PCMTD1 PCMTD2"
302 "EIF5A PPP2R1A PRDX4"
303 "ACLY CCT5"
304 "EIF4A1 PPME1 PPP2CA PPP2R1B PPP2R5A PPP2R5D PPP2R5E"
305 "CCT2 CCT3 CCT4 CCT6A CCT6B CCT7 CCT8 ESYT1 TCP1 TXNDC9 VCP"
306 "ERICH3 MSH4 TUBA3E TUBB2B UNC50"
307 "EIF4A1 PPME1 PPP2CA PPP2R1A PPP2R1B PPP2R5A PPP2R5D"
308 "PPP2R5C PPP2R5E"
309 "AFF1 AFF4 ASPM CABIN1 CCNT2 EAF1 EAF2 ELL ELL2 ELL3 FGGY ICE1 MLLT1 MLLT3 USPL1"
310 "ICE2 MPO"
311 "ATP5A1 ATP5B ATP5C1 ATP5D ATP5F1 ATP5H ATP5I ATP5J ATP5L ATP5O COX4I1 MT-ATP8 UQCRC2"
312 "SNF8 VPS25 VPS36"
313 "ABR BLVRA SNX27 SNX5 VPS26B"
314 "SMS UCHL3 VPS29 VPS35"
315 "FKBP15 TBC1D5 VPS26A"
316 "SNX1 SNX2 SNX6"
317 "EGFR SLC16A1 TOMM70"
318 "ARF5 RHEB"
319 "CCNT1 CDC73 CTR9 LEO1 PAF1 PPP1R10 RPRD2 RTF1 SUPT5H SUPT6H TOX4"
320 "ATP6V1B2 ATP6V1D ATP6V1E1 ATP6V1H"
321 "ATP6V1C1 SMS"
322 "CRYZ QDPR"
323 "CDC37L1 PDCD2L PRMT3"
324 "PPIP5K2 SERF2 USF1 ZNF706"
325 "NAA35 SSU72 TRIO"
326 "ACTN3 GABPA"
327 "BRD1 DAXX JADE2 NIPBL SCAF4 ZFP91 ZNF280C"
328 "CDK12 CDK13"
329 "ATRX CBX1 CBX2 CBX3 CHD1 IWS1 ORC1 PHC2 PHIP RPS19BP1 RSF1 TFDP1 UBQLN4 VRK3"
330 "ING4 JADE1 JADE3 KAT7"
331 "C18orf21 CCDC71L KDM6B"
332 "CENPV KMT2A RAI1"
333 "ADNP2 INCENP LAS1L RBBP5 SENP3"
334 "ARCN1 COPA COPB1 COPB2 COPG1"
335 "RPAP3 ZC3H15"
336 "BTF3L4 DNAJC2"
337 "ALKBH5 EIF2D HSPA14 NFAM1"
338 "C19orf43 PCNP"
339 "FABP7 NRXN1 TKTL2"
340 "ENO3 FKBP1B NME2 TAGLN3"
341 "TAGLN TSTD1"
342 "FAM126B STAT4"
343 "ASF1B MAPK7"
344 "MEA1 NFATC2IP POLE4 SLBP"
345 "ISOC1 PITPNB"
346 "SERPINB9 TXNDC17 UBE2K UBE2N UBE2V1"
347 "ANXA2 ARAP3 CAPZA2 CD59 CDIPT IQGAP1 KCNN4 LMO7 PLEC PSMB10 RAC3 SRI"
348 "ACTB ACTN4 ACTR2 ACTR3 ARPC1A ARPC1B ARPC2 ARPC3 ARPC5 BASP1 CAPZA1 CLIC1 MSN WDR1"
349 "AP2A1 AP2B1 AP2M1 CD44 CLTA CLTC MYH10 NUMB PPP1CC PPP1R18"
350 "ACTN1 TPM4"
351 "AAK1 BMP2K CLINT1 CLTB CLTCL1 FCHO2 GTSE1 HIP1R SEC16A"
352 "CEP89 DDHD1 ITPKA SIPA1L3 SSH1 SSH2 TPRN"
353 "AFAP1 ARPC4 CTTN PPP1CA"
354 "ABLIM1 ACTA1 ADD1 AKAP2 ARHGAP11A ARHGAP21 ARHGEF17 ARPC5L CALM1 CALML3 CAPZB CEP162 CFL2 CGN COBL CORO1B CORO1C CORO2A CPM CYBRD1 DAB2 DAPK3 DBN1 DENND1A DSG2 DST EPS15 FARP1 FDX1 FLII FLNA FLNB FLOT1 GAK GAS2L1 GPRC5A INF2 ITPR3 KCTD10 LIMA1 LIMCH1 LRRFIP2 LUZP1 MICAL3 MISP MYL12B MYL6B MYLK MYO18A MYO19 MYO1B MYO1C MYO1E MYO5A MYO5B MYO5C MYO6 NEXN NF2 PACSIN3 PALM PHLDB2 PICALM PIK3C2A PLEKHG3 PPP1CB PPP1R12A PPP1R12B RAI14 SIPA1L1 SORBS2 SPECC1 SPECC1L SPTAN1 SPTBN1 SSFA2 ST5 STON2 SVIL SYNPO TES TMOD1 TMOD3 TPM1 TPM2 TPM3 TRIOBP TWF1 YES1 ZBTB20 ZDHHC5"
355 "ARHGAP42 CARD10 CEP83 DIXDC1 FAM161A GAS2L3 JMY KIAA1211 NARFL SH3BP5 SIPA1 TCEA2"
356 "KCTD13 TNFAIP1"
357 "ACTRT1 ADD3 FGD4 ITPR1 MCF2L NCKIPSD S100A10 SPTBN2 TJP2"
358 "CAP1 CFL1"
359 "ABCG1 AFTPH AP1AR AP1B1 AP1G1 AP1G2 AP1M1 AP1M2 AP1S1 AP1S2 AP1S3 HEATR5B NUDT3"
360 "AOX1 CACNA1I CORIN DRP2 FAM92B KIF2B LIG1 MBOAT2 MLXIPL ORC1 POLA1 POLE RFC1 RFC3 SCNN1G SUGP2"
361 "HAT1 NASP NCAM2 RBBP4 ZFY"
362 "CHTF18 CHTF8 DSCC1 RFC2 RFC4 RFC5"
363 "ESPL1 POLD1 POLD2 POLD4"
364 "POLA2 PRIM1 PRIM2"
365 "CHAF1A CHAF1B"
366 "APEX2 ATAD5 PCNA POLD3 POLE3 POLE4 SLBP"
367 "KIF2C TOP2A TOP2B"
368 "CHTF18 CHTF8 IL36A LIG1 PTPN14 RFC1 UBA1"
369 "RFC2 RFC3 RFC4 RFC5 TRIP13"
370 "ESPL1 PTTG1"
371 "DSCC1 SLC35G2"
372 "MAPRE1 MAPRE2"
373 "PGBD5 PIP5K1C RABGGTB"
374 "CALCOCO1 FAM175A ZC3HAV1L"
375 "PJA2 ZC3H18"
376 "NCBP2 PHAX"
377 "CLK2 LARP1B PABPC4L RBM7"
378 "CLK1 SNRNP48"
379 "AKT2 AKT3 EIF4EBP1 HNRNPLL SZRD1 UBAC1"
380 "CSTF1 THOC3"
381 "RNPS1 SAP18 SCAF11 UPF1"
382 "BRD3 BRD4 KRIT1 UIMC1"
383 "INTS6 UBTF"
384 "RBSN VPS45"
385 "KNTC1 RINT1 ZW10"
386 "PPFIA4 TGDS"
387 "CDPF1 DDX60L TDG ZFYVE21 ZSCAN26"
388 "KIAA0930 KLHL11 WRN"
389 "AARS2 FBXO38 GFM2 MARS2 TMLHE TMOD2"
390 "FGL1 SPATS2L"
391 "ALKBH6 PLA2G6"
392 "AKR1B10 AKR1D1 RAC3 SLC39A7"
393 "AKR1C1 AKR1C3"
394 "AKR1C2 UFM1"
395 "SLC35F6 TIMM23 TOMM20"
396 "HMGA1 HSPD1 PHF5A SF3B5 TRAP1"
397 "ATXN2L C19orf43 CIRBP DEK DNAJC8 PCNP ZNF207"
398 "CHERP MFAP1 PRPF38A RBM10 RBM17"
399 "CCDC124 PPIL4"
400 "FKBP5 TAB1"
401 "MCM10 MCM2 MCM3 MCM4 MCM5 MCM6 MCM7"
402 "CLSPN GINS1 GINS2 GINS3 GINS4 TIMELESS TIPIN"
403 "PLK1 TOPBP1"
404 "ANP32E HDGF UBA2"
405 "AHCYL1 AHCYL2"
406 "HDGF IMPA1 ISOC1"
407 "C12orf10 DENR SAE1 SUMO3 UBA2"
408 "FDXACB1 THUMPD1"
409 "CTBP2 DAZAP1 IRF2BP2 SPEN"
410 "FBXO42 FHL1 MAML1 NOTCH1 RBPJ WDR70 ZNF589"
411 "CMTM4 CYP2U1 SPN"
412 "BZW2 EIF2B1 EIF2B2 EIF2B3 EIF2B4 EIF2B5"
413 "KIAA0368 VAC14"
414 "FIG4 PIKFYVE"
415 "MTOR RICTOR"
416 "CA14 EVA1B SLC38A7"
417 "CCND2 OGFR"
418 "EED EZH2 MTF2 SUZ12"
419 "CDK4 CDKN2B"
420 "AEBP2 JARID2 PHF1 PHF19"
421 "CCND3 CDK6 CDKN2C EIF2AK1 UBE2W ZNF2"
422 "MIS18A OIP5"
423 "CDKN2D JAK3"
424 "CTIF DDX19A DDX25 MIF4GD"
425 "ENO1 LDHA LDHB PKM"
426 "PRDX1 PRDX6"
427 "HSP90B1 P4HB"
428 "ACTG1 CALR GAPDH HSP90AA1 HSPA1B HSPA4 HSPA5 HSPA6 HSPA8 PDIA3"
429 "TUBB2B VCP"
430 "PFN1 TPI1"
431 "CHD8 LAS1L PELP1 SENP3 TEX10 WDR18"
432 "CENPF NOL9 NOM1"
433 "RSBN1L SDAD1"
434 "CORO1B CTTN STK10"
435 "ABCF1 PACSIN2 ST13"
436 "DENND3 IPPK MAST3 POLR3A USP16"
437 "HCLS1 POLR1C"
438 "CD3EAP CRCP DCAF4 GPN1 PLEKHM2 POLR1B POLR1D POLR2B POLR2F POLR2H POLR2K POLR3B POLR3C POLR3D POLR3E POLR3G POLR3GL POLR3H POLR3K RRN3 TWISTNB ZNRD1"
439 "MAF1 POLR3F"
440 "GCLM PAFAH1B1 PAFAH1B2 PAFAH1B3"
441 "LRRC47 PSMD5 PSMD9"
442 "C1orf123 CDV3 CRK"
443 "CORO7-PAM16 FKBP10 MTHFD2"
444 "LYRM2 OXSM"
445 "SUPV3L1 ZMAT3"
446 "LACTB MRPS7 MYH8"
447 "ELAVL2 LIN28B SRSF12 STKLD1"
448 "FOXD4L6 LRP1B SFRP4"
449 "HIC2 HOXA5"
450 "ZNF747 ZNF783"
451 "GCC2 HLTF KANSL1L"
452 "MCM5 WDHD1"
453 "MCM10 MCM2 MCM3 MCM4 MCM6 MCM7"
454 "NONO SNRPA"
455 "DHX29 FOCAD GTPBP1"
456 "ATF1 CREB1 JUNB ORC6"
457 "PWP2 RRP9 WDR3"
458 "ATF2 ATF7 FOSL2 JUND"
459 "CREM TUFT1"
460 "GMPR GMPR2 TPD52L1"
461 "ARL6 TANGO2"
462 "RRM1 RRM2"
463 "GNAI3 GNB1 GNG5"
464 "GNA11 GNA13 GNAQ RP2"
465 "C1orf52 DIS3L2 FERMT1 MAD2L1BP"
466 "BCL7C HMGN3"
467 "C5orf22 EPM2AIP1 PRIM1 PRIM2"
468 "AMZ2 MAD1L1 MAD2L1 THUMPD3"
469 "CCNT1 CDC73 CTR9 LEO1 PAF1 RTF1 SUPT4H1 SUPT6H TOX4"
470 "ELOF1 POLR2C PPP1R10 RPRD1A RPRD1B RPRD2 SETX SUPT5H"
471 "NBEAL2 PHF3"
472 "CCNE1 CREBBP OGFR RBL2 SRRD"
473 "CCNE2 CDK2 CDK3 CDKN3 EP300 RBL1"
474 "ALKBH8 CCNA2 CDKN1B CKS1B CKS2 GMNN PARP10 SKP2"
475 "CCNB1 CCNB2 CCND1 CDK1 CDKN1A"
476 "CDKN1C RMDN1"
477 "CCND2 CDK4 CDKN2B"
478 "IPO5 IPO7 TNPO1"
479 "KPNB1 RAN"
480 "PYCR1 PYCR2"
481 "KITLG KLHDC10"
482 "ANAPC1 ANAPC10 ANAPC13 ANAPC15 ANAPC16 ANAPC2 ANAPC4 ANAPC5 ANAPC7 BEND3 BUB1B CDC16 CDC20 CDC23 CDC26 CDC27 CFAP97 FBXO5 FZR1 GNPTAB GNPTG NEK2 RTKN ZNF12"
483 "COLGALT1 PLOD1 PLOD3"
484 "BRD2 CWC27 HNRNPA1L2 HNRNPA3 HNRNPF HNRNPH2"
485 "RNMT UBTF"
486 "MAGOH NOP9 SETD1A"
487 "LRWD1 ORC1 ORC2 ORC3 ORC5 ORC6"
488 "SMC5 VRK1"
489 "TAB2 YTHDF1"
490 "SPATA5 SPATA5L1 TMA16"
491 "RPL22L1 VMAC"
492 "ABCF2 EPB41L2"
493 "ABCF2 EPB41L2 RPAP3 RRAS STK32C UXT"
494 "TAB1 ZC3H15"
495 "PIH1D1 WDR92"
496 "GTF3C1 GTF3C2 GTF3C3 GTF3C4 GTF3C5"
497 "RNASEH2A RNASEH2B TK1"
498 "CDK10 FAM84B"
499 "NOSIP TNNC2"
500 "DIEXF LRCH4"
501 "NUCKS1 STUB1"
502 "COPS2 COPS3 COPS4 COPS5 COPS6 COPS7A COPS7B COPS8 CUL3 CUL4A CUL4B DCAF11 DDB1 DDB2 ERCC8 GPS1 RBX1"
503 "ATP6AP1 SEC63 SRPRB"
504 "AGPS EMC2"
505 "CKAP4 DHCR24 KTN1 NCLN"
506 "EPHX1 HMOX2 POR"
507 "CLPTM1 TMX2"
508 "AEBP2 PHF20L1"
509 "ARID4A ARID4B ARID5B BAZ2A BRMS1 BRMS1L C1orf122 CCDC71 CDK2AP1 CHD3 CHD4 CHD5 DPF2 ERCC6 FAM60A FOXK2 GATAD1 GATAD2A GATAD2B GSE1 HDAC1 HMG20A HMG20B ING1 ING2 KDM1A KDM5A MIER1 MTA3 NPAT PHF12 PHF14 PHF21A PWWP2A RAI1 RBBP7 RCOR3 RREB1 SAP130 SAP30 SAP30L SHPRH SIN3B SUDS3 TCF20 TNRC18 TRERF1 TRPS1 ZBTB2 ZFP64 ZMYM3 ZNF217 ZNF219 ZNF521 ZNF592 ZNF609 ZNF639 ZNF687"
510 "CDCA5 RAD21 SMC1A SMC3 STAG1 STAG2"
511 "BAZ1A BCL11A HDAC2 KDM5B LIN9 MBD2 MBD3 MTA1 MTA2"
512 "CIZ1 MXD1 SIN3A"
513 "MORF4L1 MRFAP1 MRFAP1L1 PALB2"
514 "PML ZMYM2 ZMYM4"
515 "EXOC1 EXOC2 EXOC3 EXOC4 EXOC5 EXOC6 EXOC7 EXOC8"
516 "COX15 HIGD1A ICMT MTFP1 ROMO1 SFXN4 TIMMDC1 YME1L1"
517 "COMTD1 EXOG GLCE GNPAT MARC2 MOSPD2 PDCD4 PEX19 PEX3 PHKA1 PXMP2 QPCTL SCO1 USP28"
518 "HIGD2A MUL1"
519 "ACTN1 ANXA5 ARPC2 CLIC1 DSTN G6PD GDI2 LASP1 PFKM SLC9A3R1 STK10 TPM4"
520 "ACTA1 ACTB ACTN4 ACTR2 ACTR3 ARPC1A ARPC1B ARPC3 ARPC4 ARPC5 BASP1 CORO1C PPP1CA TMOD3 WDR1"
521 "CORO1B CTTN"
522 "ARPC5L CFL2 PLS3"
523 "PDLIM1 PDLIM5"
524 "DONSON GMPS LSM4 LSM5 THUMPD2 USP7"
525 "LSM7 METAP1 RBM42"
526 "CINP ZSWIM8"
527 "PRKAA1 PRKAA2 PRKAB1 PRKAB2 PRKAG1 PRKAG2"
528 "ANKRD52 DCLRE1C"
529 "NPEPL1 TPPP"
530 "ACTN3 GABPA ZNF706"
531 "PPIP5K2 SERF2"
532 "CDK17 TDRD7"
533 "GABPB1 SUMO3"
534 "TRIM16 TRIM16L"
535 "DHX35 FAM32A USB1"
536 "COIL CWF19L2 DGCR14 GPATCH1 GPATCH11"
537 "SMIM12 ZC3H12C"
538 "CNOT4 EEF2KMT"
539 "CS IDH3A SUCLG2"
540 "ECHS1 ETFB HSPE1"
541 "DBT GLUD1 IDH3B"
542 "CS IDH3A"
543 "DLAT DLD DLST OGDH PDHA1 PDHB PDHX"
544 "CHMP5 MVB12A TSG101 VPS28 VPS37A VPS37B"
545 "MVB12A TSG101 VPS28 VPS37A VPS37B"
546 "CAPN7 VPS4B VTA1"
547 "FLOT1 STOM"
548 "CHMP1B CHMP2A CHMP2B CHMP3 CHMP5"
549 "CHMP1A IST1 MITD1"
550 "LIMD2 VLDLR"
551 "FLAD1 PLEKHO2"
552 "AS3MT REV1"
553 "FAM184A PHLPP2"
554 "TAF1 TAF3"
555 "ATF7IP SETDB1"
556 "KLHL14 TSGA10IP"
557 "NAA11 NAA16"
558 "ACAP2 NAA10 NAA15"
559 "AACS HYPK"
560 "LIPT1 STAT2"
561 "ANKRD30A OTUB2"
562 "TFAP2A TFAP2D"
563 "ABCD3 ATP2A2 MT-CO2 PHB PHB2 STOML2 VDAC1 VDAC2 VDAC3"
564 "CHCHD3 SLC25A11"
565 "AKR1B10 MRPS2 TOMM20"
566 "LMTK2 PPP1R2 SNCAIP THYN1"
567 "CSRNP2 PPP1CB PPP1CC PPP1R7"
568 "C20orf27 PPP1R3D"
569 "GPAT2 KRT2 WEE1 ZIM3"
570 "INO80E KLF5"
571 "ACTL6A ACTR5 ACTR6 ACTR8 C12orf45 CCNDBP1 INO80 INO80B INO80C INO80D MCRS1 NFRKB PIAS1 PINX1 RUVBL1 RUVBL2 TBRG1 TFPT ZNF148"
572 "MORF4L1 MRFAP1 MRFAP1L1"
573 "FOXR1 MORF4L2 MYC PALB2 PLAC1 TRRAP"
574 "PDRG1 PIH1D1 RPAP3 URI1 UXT WDR92"
575 "DPCD LENG1 RPAP2 SNX16 TTI2 ZNHIT1 ZNHIT2"
576 "APLF BAHD1 C16orf87 CRAMP1 GINS3 GON4L HIST1H1T HIST1H2BA MIER3 MMS22L PARP2 TONSL TRIM41"
577 "BRD8 DMAP1 EP400 EPC1 EPC2 ING3 JAZF1 KAT5 LRRC42 MBTD1 MEAF6 MRGBP SRCAP VPS72 YEATS4"
578 "CCZ1 MARCKSL1 PFDN4 UBAC1"
579 "AP5M1 SPG11"
580 "ABLIM3 EPG5"
581 "AFTPH DOCK8 PFKFB2 TRIM21"
582 "ITPKB PDE4A PDE4D"
583 "DPY30 REPS2"
584 "GTF2F2 POLR2C SUPT5H"
585 "GTF2B GTF2F1 TCEA1"
586 "CTDP1 PSME4"
587 "GTF2E2 SPOCK1"
588 "CUEDC2 GTF2A1 GTF2A2 GTF2E1 UBE2R2"
589 "DYSF RASIP1"
590 "ABCA7 GPRIN1 HNRNPAB HNRNPD"
591 "BRD9 ZCCHC17"
592 "CIR1 SUGP1 TFIP11"
593 "SNX1 SNX6"
594 "ATG2A CSDE1 DROSHA EWSR1 RBM6 TAF15"
595 "DDX1 DGCR8 FUS HNRNPDL HNRNPUL1 TARDBP"
596 "APOBEC3B PPP1R10 RBM12B YLPM1"
597 "HAT1 NASP"
598 "ATG14 BECN1 NRBF2 PIK3C3 PIK3R4 SOGA3"
599 "CCNT1 CDC73 SUPT5H"
600 "CTR9 LEO1 PAF1 PPP1R10 RPRD2 RTF1 SUPT4H1 SUPT6H TOX4 VEZF1"
601 "PHF3 RPRD1B SETX"
602 "HTATSF1 SART3"
603 "CDK9 HEXIM2"
604 "C1QBP LBR"
605 "SPTLC1 SPTLC2"
606 "ATPIF1 COX6B1 SDHB UQCRH WNT9B"
607 "COX4I1 COX5A COX5B CYC1 UQCRC1"
608 "ATP5D ATP5F1 ATP5J ATP5L"
609 "ATP5A1 ATP5B ATP5C1 ATP5H ATP5O UQCRC2"
610 "ATP5I LAMTOR5 MT-ATP8"
611 "NDUFA2 UQCRFS1"
612 "AFG3L2 HSPA9 SDHA"
613 "COX6C UQCRB"
614 "COG1 COG2 COG3 COG4 COG5 COG6 COG7 COG8"
615 "DNAAF5 GLMN"
616 "MECP2 SMARCA2"
617 "FNDC4 TRPM4"
618 "C1orf159 LRRC4B SDK1 SLC35A5 SLC36A1"
619 "CDK5 NUBP2"
620 "CABLES1 FIBP"
621 "CASP1 GAB1"
622 "PI4KB RDM1"
623 "CCNH CDK7 ERCC2 ERCC5 GTF2H3 GTF2H5 MNAT1 MPLKIP PTS"
624 "GTF2H1 GTF2H2 HMGN3"
625 "MND1 PSMC3IP"
626 "NFATC1 NFATC4 PPP3CB PPP3CC RCAN1 RCAN3 SMYD3 WDSUB1"
627 "FHL2 FHL3 HIPK1 MKL2"
628 "DDX20 GEMIN4 KIAA1524"
629 "FANCD2 XRN1"
630 "GEMIN2 GEMIN6 GEMIN7 GEMIN8"
631 "SNTA1 TBC1D25"
632 "ALKBH4 DUS1L"
633 "CASP7 MTHFS"
634 "CSTF3 FEN1 LSM14B RECQL TCEA1"
635 "CDKN2AIP FUBP1 PPIH PPIL3 WDR82"
636 "CPSF1 CPSF2 CPSF3 CPSF4 FIP1L1 PAPOLA SYMPK WDR33"
637 "CITED2 CREBBP"
638 "EP300 RBL2"
639 "FEN1 HMGB1 HMGB2 PPIL3 RECQL"
640 "MCM4 NONO SNRPA"
641 "CSNK2A1 CSNK2A2 CSNK2B SSRP1"
642 "BUB1 BUB1B CDC20"
643 "KIF5B KLC1 KLC2 KLC4"
644 "ACADSB HINT2 SUCLA2 SUCLG1 SUCLG2"
645 "FAM104A UBXN2B"
646 "SUCLA2 UBXN6 VCPKMT"
647 "KRT1 SHANK1 SOD1"
648 "PRDX2 TXN"
649 "KPNA2 LRPPRC SLIRP"
650 "LACTB MRPL24"
651 "HADHA HADHB PDHB"
652 "ATG3 GNL1"
653 "HIST1H1E MAGED2 NAP1L1 NAP1L4"
654 "DIRAS3 RNF19B"
655 "ERCC3 FAM120C PCF11 RBM6"
656 "CLP1 MOB3A"
657 "CPSF7 PFKFB2"
658 "NONO PRKDC PTBP1 SFPQ"
659 "KDM3A USP16"
660 "CDC73 CTR9 LEO1 PAF1 RTF1 SUPT6H TOX4 WDR61"
661 "PPP1R10 RPRD1B RPRD2 SUPT4H1 SUPT5H"
662 "CTDP1 MED26 POLR2A POLR2B POLR2C POLR2D POLR2G POLR2I POLR2J SETX"
663 "ARMC5 CD3EAP CRCP DCAF4 DXO GPN1 MAST3 PLEKHM2 POLR1B POLR1C POLR1D POLR1E POLR2E POLR2F POLR2H POLR2K POLR2L POLR3A POLR3B POLR3C POLR3D POLR3E POLR3G POLR3GL POLR3H POLR3K RRN3 TWISTNB ZNRD1"
664 "BIN1 GPN2 POLR2M RECQL5 RPAP2 RPRD1A SERGEF SSNA1"
665 "HEXIM1 HEXIM2 NSMAF"
666 "ANKHD1 ELAVL2 LIN28B MRPL20 POU4F3 SRSF12 ZNF747 ZNF783"
667 "MRPS12 SAMD4B STKLD1"
668 "THAP2 TRIM71"
669 "FABP12 MRPL36"
670 "CDC42EP4 SEPT10 SEPT11 SEPT2 SEPT4 SEPT5 SEPT6 SEPT7 SEPT8 SEPT9"
671 "DPP3 IAH1 MAT2A MAT2B"
672 "AASDHPPT ADSS"
673 "PGP TSTA3"
674 "GMDS PDXK"
675 "PGD SHMT1"
676 "ABCE1 AHSA1"
677 "DONSON LSM2 LSM5 SYMPK THUMPD2"
678 "CPSF1 CPSF4 FIP1L1 PAPOLA WDR33"
679 "CPSF2 CPSF3"
680 "DNAJC7 LSM1"
681 "MZT1 MZT2B NEDD1 NME7 TUBG1 TUBGCP2 TUBGCP3 TUBGCP4 TUBGCP5 TUBGCP6"
682 "CCDC6 IGBP1 PPP2CB PPP2R5D"
683 "PPME1 PPP2CA PPP2R1B PPP2R5A"
684 "MGMT PFDN1"
685 "EIF4A1 PPP2R1A"
686 "PIN1 PPP2R2A"
687 "PPP4C PPP4R1"
688 "PPP2R2D WNT10B"
689 "HPS5 TCL1B"
690 "DKK1 TK2"
691 "SERTAD4 ZNF645"
692 "CORO6 SOX17"
693 "ANKRD50 ANKRD55 ARL13B IFT22 IFT46 IFT52 IFT81 TTC30A TTC30B"
694 "CEP44 HOMER1 HOMER2 HOMER3 POC1B SPTBN4"
695 "CDR2 CLUAP1 IFT172 IFT20 IFT57 IFT74 IFT80 POC1A TRAF3IP1"
696 "CMC1 HSBP1 RABEP2"
697 "BAIAP2 KIAA1522 TSPO"
698 "NELFA NELFB NELFCD NELFE"
699 "ESYT1 PRDX4 RDH11 STIM1"
700 "CCT2 DNAJA2 EIF5A"
701 "BTBD19 MAST4 ZBTB21"
702 "AARSD1 GANC JADE2"
703 "ASH1L ASH2L C14orf93 CHN1 HCFC2 IKZF5 MEN1 NCOA6 PRDM10 PRICKLE2 PWWP2A UBN1 ZMYND11 ZNF197 ZNF236 ZNF354B ZNF408 ZNF646 ZNF845 ZNF91 ZXDC"
704 "BTF3 BTF3L4 DRG1 NACA NEMF TACO1"
705 "DGKQ TXN2"
706 "DCAF13 RRP36"
707 "ASH2L C14orf93 HCFC2 IKZF5 JADE2 KANSL1 KAT7 KDM6A KMT2A KMT2D MEN1 PPP1R3F PRDM10 PRICKLE2 UBN1 UBN2 WDR5 ZBTB24 ZMYND11 ZNF197 ZNF236 ZNF354B ZNF408 ZNF646 ZNF845 ZNF91 ZXDC"
708 "BZW2 IPO11"
709 "EIF2B1 EIF2B2 EIF2B3"
710 "UPF2 UPF3B"
711 "PHF6 SFSWAP"
712 "ABCE1 GART"
713 "PRPS2 PRPSAP2 TARS"
714 "FARSB PRPS1"
715 "AHSA1 HSPBP1"
716 "LIG4 RAD50 TP53BP1 WRN XRCC4 XRCC5 XRCC6"
717 "RPA1 RPA2 RPA3"
718 "DHX9 H2AFX KHDRBS1 PRKDC"
719 "ACD BRWD3 DCLRE1B KANSL2 POT1 TERF1 TERF2 TINF2"
720 "IPO7 KPNB1"
721 "RAN RANBP1"
722 "EEF1B2 EEF1D REEP5"
723 "CRKL TWF2"
724 "ECH1 HSPE1 OXCT1"
725 "ECI2 ZADH2"
726 "ECHS1 ETFB"
727 "KY PLAC1 TAF5 TMEM30B"
728 "AFF3 TAF1 TAF3 TAF6"
729 "DHX34 SFMBT1 TAF1L TAF4 TAF7"
730 "ATAD3C CFAP58 EPB41L4B TAF10 TAF2 TAF4B TAF8 TAF9B UBAP1"
731 "CDH10 TBPL2"
732 "SLC12A2 TMED7"
733 "ASPH TM9SF2 TMED1 TMED10 TMED2 TMED3 TMED4 TMED9"
734 "SCAMP2 VAMP7"
735 "HGS STAM STAM2"
736 "ANXA6 FKBP4 MAT2A"
737 "PFDN6 SRM"
738 "ABCE1 AHSA1 GART GMPS IDE"
739 "BTG3 CNOT1 CNOT10 CNOT11 CNOT2 CNOT3 CNOT6 CNOT6L CNOT7 CNOT8 GPBP1L1 RAVER1 TNKS1BP1 TOB1 TOB2"
740 "SULT1C2 SULT1C4"
741 "CEP104 SNX16"
742 "ANKRD62 HEATR5A KIF6"
743 "CIAO1 FAM96B MMS19"
744 "FBXO7 PARP10 SLC35B1"
745 "COQ7 MRPL54"
746 "POMP PSMB9 PSME1 PSME2 PSME4 PSMF1 PSMG1 PSMG2 PSMG3 PSMG4 RNF181"
747 "FBXW2 PANX1 SPANXN3"
748 "ACD DCLRE1B KANSL2 POT1 TERF1 TERF2 TERF2IP TINF2"
749 "APOBEC3D BRWD3 TET2"
750 "MAST2 NOV REL ZSCAN31"
751 "CEP192 NFKB1 OSBPL6"
752 "ANKRD27 CHAC2 FBXW11 NFKBIA RELB SPDL1"
753 "ATXN3 NFKB2 PRKCQ"
754 "CA8 RELA"
755 "CHUK IKBKB IKBKG POLR1E"
756 "HIF1AN MCC NFKBIB"
757 "TBK1 TXLNA"
758 "ADAL PHF23 POLR2I UNC79"
759 "ARMC5 DXO"
760 "ATP2B1 SLC16A1"
761 "GOLGA4 HS1BP3"
762 "MTHFR RASSF1"
763 "RASSF2 STK3 STK4"
764 "LCORL NOL4 NOL4L ZEB2"
765 "CCDC148 TEX9"
766 "E2F7 ENKD1 RCOR2 TOR2A"
767 "ARF1 DNAJB1 STIP1"
768 "CTBP2 IRF2BP2"
769 "ARFGAP1 ARFGAP3 GSTM5"
770 "CCDC92 PRICKLE1 UCHL5"
771 "WNT3 WNT3A"
772 "KIF3C PPP2R5B"
773 "ERCC6L POLD1 POLD2 POLD4 TTF2"
774 "CHTF18 LIG1 POLA1"
775 "POLD3 POLE"
776 "NSMCE1 NSMCE4A RAD18 SMC5 SMC6 ZNF597"
777 "ASB6 IFRD1 PPP2R5B"
778 "C9orf40 NABP2"
779 "AMZ2 INPP5B PRMT9"
780 "ASNSD1 MOB3A"
781 "RFPL1 RFPL3"
782 "CISD1 COX6B1 MCU NDUFA1 NDUFB9 NDUFV1 NDUFV2 UQCRH WNT9B"
783 "COX4I1 COX5A CYC1 UQCRC1"
784 "NDUFA2 SDHB UQCRFS1"
785 "ERMP1 MTCH2 NDUFA12"
786 "DHCR7 DNAJC11 ERLIN1 MT-ND5 MTCH1 NDUFB4 NDUFB7"
787 "NDUFA10 NDUFB11 NDUFB8"
788 "ACAD9 DHRS7B OCIAD1"
789 "CPT2 NDUFS4 NDUFV3"
790 "CHCHD3 NDUFA13 NDUFA5 NDUFA6 NDUFA7 NDUFA8 NDUFA9 NDUFB10 NDUFS1 NDUFS2 NDUFS3 NDUFS5 NDUFS6 RABL3 STOML2 TMEM109"
791 "ECSIT FUNDC2 NDUFAB1 NDUFAF3 NDUFAF4 NDUFB1 NDUFB3 NDUFB5 NDUFB6 NDUFC2 NDUFS7 NDUFS8 PLGRKT RABAC1"
792 "COX5B MT-CO2"
793 "COX6C UQCRB UQCRQ"
794 "ATAD1 RMDN3"
795 "ATPIF1 TIMM9"
796 "COX7A2 MGST3 SLC25A4"
797 "MT-ND2 MT-ND4"
798 "ACOT13 MLYCD"
799 "FRMPD2 KDR PIWIL1"
800 "GLRX5 MBL2 TTC38"
801 "METRNL RIMS1"
802 "ARL8A CRYL1 EPB41 IVD MCCC2 PEX14"
803 "CLPP CLPX"
804 "BTAF1 TRIP13"
805 "ALDH16A1 DERA"
806 "C15orf40 EIF1B EIF5A2"
807 "MON1A SP6"
808 "PHYH TRIM22"
809 "KDM8 PPFIA4"
810 "DOHH OTUB1"
811 "CCDC130 RCCD1"
812 "KIAA0907 STARD7"
813 "AKAP13 AKAP5 AKAP7 CRYBG3 MTR PRKACB"
814 "PRKACA PRKAR1A"
815 "AKAP9 CEP57L1 PRKAR2A PRKX"
816 "AKAP1 PRKAR2B"
817 "CSPP1 GAN"
818 "PCYT1A PRKACG"
819 "AKAP11 ERCC6L"
820 "CEP68 HBP1"
821 "FRA10AC1 LENG1 PPRC1"
822 "DHFR PDAP1"
823 "DENR FKBP3 MCTS1"
824 "PIN4 SRM"
825 "APEX1 BAG3 EDF1 LRPAP1"
826 "AFG3L2 SDHA SDHB"
827 "HSPA9 HSPD1"
828 "AHNAK2 H2AFV HMCES"
829 "AKAP8 AKAP8L"
830 "DVL1 DVL2"
831 "ALKBH8 AMMECR1 B3GNTL1 CKS1B MAP3K9 NLRC5"
832 "CLIC3 SMC1B"
833 "ACADM ATP6V1F"
834 "MYH6 TPM2"
835 "ATP6V1C2 ATP6V1G2 MAGEA2 SYT5"
836 "ACTN2 TPM3"
837 "FABP5 FKBP1A TAGLN2"
838 "HINT1 PARK7"
839 "ENO2 GLRX TALDO1"
840 "SOD1 TXN"
841 "ANXA5 DSTN"
842 "GRHPR RGN"
843 "LTA4H PGM1 PGM3"
844 "ALDH9A1 ESD"
845 "RAD1 RAD17 RAD9A ZBTB14"
846 "PIK3C2B SRP19"
847 "CDK5RAP1 DDX28 MRPS12 NOA1 SAMD4B ZNF829"
848 "CCDC154 STKLD1"
849 "CSNK2A1 CSNK2A2 CSNK2B HMGB1"
850 "CFAP44 ESRRB"
851 "GRIA4 PRICKLE1"
852 "CCDC6 FAM169A IGBP1 PHACTR2 PPP2CB PPP4R2 THYN1"
853 "AGTPBP1 PPP4C PPP4R1"
854 "CCND2 OGFR UBXN7"
855 "PIK3C2B RAD9A"
856 "RAD1 RAD17 SETD1B USP32 ZBTB14 ZEB1"
857 "RAD51AP1 USP1"
858 "CASKIN2 CYFIP1 SNTB2 WASF3"
859 "ABI1 ABI2 BRK1 NCKAP1 WASF2"
860 "ARHGEF6 ASAP1 CBL GIT2 MINK1 NCK2 WASF1 WASL"
861 "BHLHE41 GPX1 PEF1"
862 "DDT DPYSL2 MIF MTPN PIN1"
863 "AMDHD2 GNPDA1"
864 "GALK1 PEPD"
865 "ATG16L1 ATG5"
866 "BNIP3L WIPI2"
867 "C16orf70 MASTL"
868 "PAAF1 PSMD5"
869 "TIMM10 TIMM9"
870 "CLDND1 GOLGA7 ZDHHC8"
871 "AP4B1 AP4E1 AP4M1 AP4S1 SUV39H2"
872 "CC2D2A CFAP221"
873 "FOXR2 MAX MXD1 SIM2"
874 "FMO1 RPA4 TULP1"
875 "CMTM4 EIF2B4 EPHB3 OPN3"
876 "BZW2 CA14 EIF2B1 EIF2B2 EIF2B3 EIF2B5 EVA1B"
877 "FIG4 KIAA0368 VAC14"
878 "ALDH1B1 ALDH2 DNAJC5 LGMN"
879 "ARMC8 GID8 MAEA MKLN1 RANBP10 RANBP9 RMND5A WDR26 YPEL5"
880 "CCDC28B HYKK OSGEP TMEM51 TP53RK"
881 "AMMECR1 LAGE3"
882 "KDM4B SAC3D1"
883 "MTRF1 NFYC"
884 "NFYA NFYB UHRF2"
885 "DHDDS FOXP4"
886 "TRAPPC1 TRAPPC11 TRAPPC12 TRAPPC2L TRAPPC3 TRAPPC4 TRAPPC5 TRAPPC6A TRAPPC6B TRAPPC8 USP24"
887 "PHKA2 PHKB PHKG2"
888 "LIPE MGEA5"
889 "NFYA UHRF2"
890 "CTNND1 DIAPH2 PHLDB1 RNASEH2C SMARCAL1 WNK2"
891 "DFFA DFFB"
892 "ACTG1 HSP90B1 P4HB TUBB2B VCP"
893 "ERICH3 TUBA3E UNC50"
894 "RC3H1 SEC23B"
895 "SEC23A SEC24A SEC24C SEC24D"
896 "HMGCS1 PAK2"
897 "DHX36 MAK16"
898 "KRR1 SRBD1"
899 "NOC4L NOP14"
900 "GPANK1 TTC19"
901 "ARL6 MMACHC TANGO2"
902 "C2orf76 GSTZ1 HYDIN PGM2L1 PTK2B RPIA"
903 "GNPDA2 HDHD3 TRNT1"
904 "ARID3B BCAT1"
905 "ARNT DCAF15 HIF1A TCEANC2"
906 "BTF3 BTF3L4 NACA NEMF TACO1"
907 "AARS GDI1"
908 "CHML RAB22A RAB31"
909 "GDI1 RAB10 RAB14 RAB1A RAB1B RAB2A RAB5B RAB5C RAB7A RAB8A"
910 "AAR2 EAPP ECD KLHL36 NCDN SLC7A6OS"
911 "ANP32E C20orf27 HDGF UBA2"
912 "PPP1R2 THYN1"
913 "ACTG1 CALR DNAJA2 HSP90AA1 HSP90AB1 HSPA4 HSPA5 HSPA6 HSPA8 PDIA3 PFN1 STIP1"
914 "NACA PCBP1"
915 "ASCC1 ASCC2 ASCC3 TRIP4"
916 "KCNJ10 RANBP17 RGS6 STK19 TMEM255A"
917 "PKP4 SEC24B SEC31A"
918 "SEC23A SEC23B SEC24A SEC24C"
919 "MYH6 TPM2 TPM3"
920 "MYH1 MYH3 MYL4"
921 "ACTN2 ATP6V1F"
922 "CAB39 CAB39L STRADA"
923 "CDNF LYRM4 NFS1"
924 "DHTKD1 MRPS36 PARS2 PGLYRP3"
925 "AP2A2 AP2B1"
926 "ACO1 GBE1 KIAA0368 PLAA"
927 "PPP6R3 ZNF281"
928 "ANKRD28 ANKRD44 NOTCH2 NOTCH3 PPP6C PPP6R1 PPP6R2"
929 "MAML1 NOTCH1"
930 "EPM2AIP1 PRIM1 PRIM2"
931 "KATNA1 KATNB1 KATNBL1"
932 "C5orf22 SURF2"
933 "KRT1 SHANK1"
934 "KIF23 RACGAP1 SHCBP1"
935 "ADA ADHFE1 ADSSL1 NPEPPS"
936 "AKR1C4 ASPDH"
937 "GRHPR RAC2"
938 "APRT HINT2 LYPLA1"
939 "LTA4H PGM1"
940 "ATP6V1B1 NCOA7"
941 "AIPL1 ATP6V1C2 ATP6V1E2 ATP6V1G2 MAGEA2 SYT5"
942 "KIF11 MTTP RWDD4"
943 "METTL14 METTL3 PAPOLA"
944 "CLUH FANCA LONP2 MSTO1 RPAP1 TRIM65"
945 "ARHGAP25 ELP2 IKBKAP KDM5C"
946 "CDC123 KDM3B PIK3C2A"
947 "HPS3 NPRL3 TANGO6"
948 "AP5B1 ARHGEF1 HPS6 JMJD4 LCMT2 TROAP"
949 "CDK7 MOCOS NXN WDR53"
950 "DONSON LSM5"
951 "PELI3 PNPLA1"
952 "KCMF1 UBR4"
953 "HECTD3 ZZEF1"
954 "DSN1 NDC80 NUF2 SPC24 SPC25 ZWINT"
955 "NDUFAF6 PMF1"
956 "NAF1 SHQ1"
957 "CSTB PAICS PSAT1"
958 "EXOC1 EXOC2 EXOC3 EXOC4 EXOC5 EXOC6 EXOC6B EXOC7 EXOC8"
959 "AP3B1 AP3M2 AP3S1"
960 "AP3B2 AP3S2 BCAS4 BIRC6 BLOC1S1 BLOC1S2 BLOC1S3 BLOC1S4 BLOC1S5 C9orf16 DISC1 DTNBP1 KXD1 NAV1 SNAPIN SYBU TRIM37 TXLNB"
961 "TSSC1 VPS51 VPS52 VPS53"
962 "BCL9L BLOC1S6"
963 "SNX4 SNX7"
964 "ICOS TNF"
965 "TNFRSF1A WDR24"
966 "GK2 RAB39B SLAMF1 TAMM41"
967 "ABCA7 ZNF286B"
968 "BCORL1 CIZ1 RNF169 RREB1 ZNF217 ZSCAN5A"
969 "GSE1 HMG20A HMG20B KDM1A PHF21A RCOR3"
970 "E2F7 ENKD1 LCORL NOL4L RCOR2 ZEB2"
971 "ECE2 RPS6KA2 ZMYM5"
972 "MRPL43 POU4F3 TMEM92"
973 "IER5 PPP2R2C"
974 "RALBP1 REPS1"
975 "PACS1 WDR37"
976 "DNAJC28 LRRC46 SIX4"
977 "TGFBRAP1 UBE2Z VPS11 VPS16 VPS18 VPS33A VPS41"
978 "DDX49 NOB1 PDCD2L"
979 "CDC37L1 PRMT3"
980 "AHNAK2 DVL2 HMCES"
981 "FTSJ1 WDR6"
982 "C17orf62 P2RX4 PIGH"
983 "ARMCX3 SLC9A1"
984 "ART3 PLCL1"
985 "SMS UBA6 UCHL3"
986 "NAPA NAPG"
987 "ASNA1 ATXN10 BAG6 GET4 UBL4A"
988 "HERC4 RABAC1"
989 "FUNDC1 FUNDC2"
990 "DNAH17 NABP1"
991 "C7orf26 INTS8"
992 "INTS2 MFN1 NF1"
993 "DUS2 HID1 PRMT7 RNASEH1 RXRB"
994 "CHTOP PDGFRA PRMT1 RSPO1 ZNF579"
995 "FOXD2 FOXD4L6"
996 "C22orf31 LACRT"
997 "APEH FAM133B NPEPPS"
998 "ITCH TSN"
999 "GRPEL2 NT5DC2"
1000 "LANCL1 OLA1"
1001 "FAM133B GOLGA3 TSN TSNAX"
1002 "CEP104 KIF24"
1003 "HSDL2 SCP2"
1004 "MACROD1 PMPCA PMPCB"
1005 "ALDH1B1 ALDH2 DNAJC5"
1006 "C12orf4 CRYZL1 PPP1R21 TBCK"
1007 "CLEC3B PIM2"
1008 "TIMM13 TIMM8A"
1009 "PDYN PENK TIMM8B"
1010 "ERCC1 ERCC4 SLX4 SLX4IP XPA"
1011 "NAA20 NHEJ1"
1012 "PAK4 PAK6"
1013 "BCOR KDM2B MORC4 PCGF1 RYBP"
1014 "AP3M1 AP3M2 CHKB PALD1 PIK3CB PLEKHF2"
1015 "CAMK1D CAMK1G"
1016 "AKAP8 DVL2 HNRNPAB WDR82"
1017 "FUBP1 PPIH PPIL3"
1018 "FAM98B SF1"
1019 "AKAP8L CCAR2 FUBP3 OGT SETD1A"
1020 "ATP5A1 ATP5B"
1021 "GPAT2 GYG2 POTED ZIM3"
1022 "FBXO34 FOXR1 MORF4L1 MRFAP1L1 PALB2 PLAC1 TRRAP"
1023 "FOXR2 SIM2"
1024 "KDM3B XPO5"
1025 "BAZ1B CHAF1A CHAF1B TOP2B"
1026 "CDKN2AIP FUBP1 PPIH WDR82"
1027 "HDHD2 LHPP"
1028 "ERCC1 ERCC4 XPA"
1029 "PRPF18 STIM2 TDRD7"
1030 "C11orf49 KIAA1841 LRRC49 NICN1 TBC1D19 TPGS1 TPGS2 TTLL1"
1031 "GOT1 NENF POFUT1 RAB9B"
1032 "GLRX IAH1 PTPN11 UBE2V2"
1033 "APC CDH10 TBPL2"
1034 "CTNNA1 CTNNB1"
1035 "CLEC18A SCRIB"
1036 "CSRP1 FAM114A1 HEBP1"
1037 "IMPDH1 NSRP1 OSBPL3 POLL PRRC2B RIOK3"
1038 "CCDC130 KDM8 RCCD1"
1039 "ANKRD9 IMPDH2"
1040 "NLRP1 NUDCD2"
1041 "AGFG1 MPP1"
1042 "SCD SSB XDH"
1043 "HSD17B10 TRMT10C"
1044 "C17orf75 WDR11"
1045 "AGO3 ANKMY2 ATXN3 NUDCD3"
1046 "ARHGEF12 TRMT61A"
1047 "DAZAP2 FNDC3B PLEKHB1 RBFOX2 RBM38 RBMS2 RBPMS"
1048 "MAP3K11 TDP2"
1049 "ARHGEF12 RBM38 RBMS2 TRMT61A"
1050 "EIF1B TRIM56 TRMT6"
1051 "PLEKHB1 RBFOX2"
1052 "PDYN PENK"
1053 "CTBP2 IRF2BP2 STIP1"
1054 "CALR DNAJA2 GAPDH HSP90AA1 HSP90AB1 HSPA1B HSPA4 HSPA5 HSPA6 HSPA8 HSPH1 PDIA3 PRDX2 VCP"
1055 "APEX1 DAAM2 HDGF"
1056 "ACBD3 SAE1 UBA2"
1057 "DENR MCTS1"
1058 "EDF1 LRPAP1"
1059 "LRWD1 ORC2 ORC3 ORC5 ORC6 VRK1"
1060 "CPOX DENR DHFR FKBP3 MCTS1 PDAP1 PTRHD1"
1061 "APEX1 EDF1 LRPAP1"
1062 "ALDOC MAPK1"
1063 "MMAA SMYD2"
1064 "ABI1 ABI2 BAIAP2 BRK1 NCKAP1 WASF1 WASF2"
1065 "CYFIP2 NCKAP1L WASF3"
1066 "ASAP1 CBL GIT2 MINK1 NCK2 WASL"
1067 "ARHGEF7 GIT1"
1068 "C15orf40 CCDC124 DNAJC2"
1069 "BTF3L4 NEMF"
1070 "KIF27 RGS19 TBC1D7 TSC1 TSC2"
1071 "SEC23B SEC24C"
1072 "SEC23A SEC24A SEC24D"
1073 "HK2 PLS1"
1074 "CDC42BPB TUBG1"
1075 "MTOR PLAA"
1076 "HGH1 MLST8"
1077 "IGF2BP2 MKRN2 RBMS1"
1078 "PRKRA PURA STAU1"
1079 "ASCC2 LARP4B"
1080 "BAZ1A CHRAC1 POLE3 SMARCA5"
1081 "CKMT1A GMPPA"
1082 "NAA20 NAA25 NHEJ1"
1083 "SAMD9 SHOC2"
1084 "EMC10 EMC4 EMC6 EMC8"
1085 "AGPS EMC1 EMC2 EMC3 EMC7"
1086 "CHAMP1 CHD2 ESF1 IWS1 PDS5B POGZ"
1087 "MAP4K4 PABPC1L UTP3"
1088 "IGF2BP2 PAIP1 RALYL"
1089 "SREK1 ZNF48"
1090 "RAB40A RAB40AL"
1091 "DCAF17 RAB40B"
1092 "FAM219A FBXO10 NBN SHPK"
1093 "NCOA1 RAB40C"
1094 "CELA2B CLP1 DIEXF LRCH4 MOB3A"
1095 "PCF11 RBM6"
1096 "CAPRIN1 ERCC3 MRE11 RBM33 SHROOM3"
1097 "NONO PTBP1 SFPQ"
1098 "CCNT1 WDR82"
1099 "DCAF7 RAE1"
1100 "DLGAP4 HERC4"
1101 "DR1 DRAP1"
1102 "ABCF3 AVL9"
1103 "BRCA1 CDK16 CDK17"
1104 "AMMECR1L DUSP16 DUSP7 DUSP9 HOXC9 MKNK2 RNF138"
1105 "CUL7 FBXW8 OBSL1"
1106 "GUK1 ZYG11A"
1107 "C2orf68 GNE PIR SMG6"
1108 "GPAA1 PIGK PIGS PIGT"
1109 "SLC1A5 SLC3A2 SLC7A5"
1110 "HBP1 PAPD7 RMND5A ZCCHC14 ZCCHC2"
1111 "AKAP1 AKAP7 PRKAR2B"
1112 "AKAP13 MTR"
1113 "CDK4 CDKN2B OGFRL1"
1114 "KIF1C MRPS17"
1115 "HMBOX1 MEMO1"
1116 "MYSM1 OSCP1 WDR54"
1117 "DNAAF2 UBE3D"
1118 "ESRP2 NUDT1"
1119 "MTTP UBE2D1 ZFYVE19"
1120 "HDAC6 UBE4B UBL7"
1121 "POTEE RCN2"
1122 "HMOX2 MARCH5 SEC63"
1123 "EPHX1 POR"
1124 "CD209 CLEC4M HTR1B"
1125 "CDS1 VSIG2"
1126 "DSN1 MIS12 NDC80 NSL1 NUF2 SP100 SPC24 SPC25 TYW3 ZWINT"
1127 "SDAD1 SPTY2D1"
1128 "DDX51 RRAS URB1"
1129 "FAM32A USB1"
1130 "CWF19L2 DHX35 GPATCH1"
1131 "ZHX1 ZHX2"
1132 "DTNB TCF4 TMEM30B"
1133 "BANP KAT2A SUPT20H SUPT3H SUPT7L TADA1 TADA2A TADA2B TADA3 TAF10 TAF5L TAF9B YEATS2 ZXDC ZZZ3"
1134 "ATXN7 ATXN7L1 ATXN7L2 ATXN7L3 DCAF5 EXO1 TAF9 USP22 USP27X"
1135 "FAM92A MBIP"
1136 "CDKN2AIPNL TAF12"
1137 "KAT2B LATS2"
1138 "RNMT SUPT20H"
1139 "CUL9 MDM4 TP53"
1140 "MAPK9 SMAD5 STK25 TAOK2 ZNF598"
1141 "FAM216A FOXJ2 MAGEA10 NCOA2 NRIP1 POU2F1"
1142 "CELSR3 MYC PPFIA4 TGDS"
1143 "KAT5 LRRC42"
1144 "CDPF1 TRAF3IP1 ZFYVE21 ZSCAN26"
1145 "DDX60L TDG"
1146 "LILRA3 LILRB1 LILRB2"
1147 "CNPY2 EXD2 MIEN1 PEX19"
1148 "COMTD1 COX15 EXOG GLCE GNPAT MARC2 MOSPD2 PDCD4 PEX3 PHKA1 PXMP2 QPCTL SCO1"
1149 "RAB26 USP28"
1150 "AUTS2 GPATCH2L HAGHL PCGF3 RNF111"
1151 "FBRSL1 TSPYL2"
1152 "CPT1B RNGTT TPX2 WDHD1"
1153 "BOD1L1 CXXC1 KDM6A KMT2D MEN1 OGT SETD1A WDR5"
1154 "PAXIP1 WDR70"
1155 "NOL11 WDR43 WDR75"
1156 "KDM6A KMT2D"
1157 "KANSL1 KANSL3 KAT8 MSL1 MSL3 R3HDM1"
1158 "MSL2 ZBTB38"
1159 "AKAP5 AKAP7 CEP170 CEP19 RUNX1"
1160 "AKAP9 CEP57L1 CRYBG3 PRKACB PRKAR2A PRKX"
1161 "AKAP1 AKAP13 PRKAR2B"
1162 "AES ANKRD26 BBS4 C2CD3 C5orf42 CCDC138 CCDC14 CCDC57 CCDC61 CCDC77 CCSER2 CDK5RAP2 CEP120 CEP128 CEP131 CEP135 CEP152 CEP290 CEP295 CEP350 CEP68 CEP72 CEP95 CSPP1 DEPDC7 DLG5 ESCO1 FGFR1OP FOPNL GAN HPS5 KIAA0753 KIAA1328 KIF7 KIFC3 LRRCC1 MIB1 N4BP3 OFD1 PCM1 PCNT PIBF1 PLEKHM2 PPP2R3C PTBP3 SCLT1 SH3PXD2A SPICE1 SSX2IP STOX2 TBC1D31 TTLL5 UPF3A WDR90 WRAP73 ZBED6"
1163 "HERC2 NEURL4"
1164 "CCDC18 FAM117B GLCCI1 NADK RBBP8 SECISBP2L SYNM TATDN3 TTC3 ZC2HC1A"
1165 "CEP164 KRT222"
1166 "MAPKBP1 ZBTB5"
1167 "LCK ZBED8"
1168 "ANK3 DOK4 PALM2"
1169 "DMXL2 ROGDI WDR7"
1170 "ATP2A1 GCNT2"
1171 "RMI1 RMI2 TOP3A"
1172 "DAPK2 ELOF1 EXO1 KIAA0556 KIF16B KLF4 LYST MAP3K1 PARD6A PTAR1 SIRT7 TAF9 ZMYM1 ZNF707"
1173 "KIF13A TMF1"
1174 "AP1G1 AP1M1 DPP3 EPN2"
1175 "AP2A2 AP2B1 STON2"
1176 "ABCG1 AFTPH AP1AR AP1B1 AP1G2 AP1M2 AP1S1 AP1S2 AP1S3 HEATR5B NUDT3"
1177 "AAGAB ZBTB8OS"
1178 "TLK1 UBE2Z"
1179 "HMMR SOGA1"
1180 "MARK2 NAP1L5"
1181 "CLASP2 MSI2"
1182 "DMXL1 DMXL2 ROGDI WDR7"
1183 "ISL2 LDB1 LHX4 LMO4 NUDT22 SSBP2 SSBP3 SSBP4"
1184 "CLEC18A ISL1 LHX1 LHX8 LMX1B PKNOX2"
1185 "MEIS1 MEIS2 MEIS3 PBX3 PBX4 PIGL"
1186 "CLEC18A IDI2 ISL1 LHX1 LHX8 LMX1B MAB21L1 PKNOX2"
1187 "DCK DGUOK"
1188 "ACBD7 UBE2C"
1189 "SPIN1 SPIN2B SPIN4"
1190 "ABAT NCDN"
1191 "CTH RFK"
1192 "CC2D2A CFAP221 MIER2 PCDHB4 ZNF644"
1193 "MSANTD2 PCGF6 YAF2"
1194 "E2F6 L3MBTL2 MGA TFDP1 ZNF280C"
1195 "MAX MXD1"
1196 "BCL6 GPATCH2 PCGF3"
1197 "BCOR BCORL1 BMI1 CBX2 CBX4 CBX7 CBX8 FBRS KDM2B MORC4 PCGF1 PHC1 PHC2 PHC3 RING1 RNF2 RYBP SCML2 USP20 YAF2 YY1"
1198 "AUTS2 GPATCH2L HAGHL PCGF5 RAD52 RNF111 TFDP2"
1199 "C16orf70 MASTL MED26 UBN1"
1200 "ASF1A C15orf41"
1201 "ASXL1 SH2D2A"
1202 "BAP1 KDM1B"
1203 "ASXL2 MBD5 MBD6"
1204 "FBXO42 FHL1 MAML1 NOTCH1 RBPJ"
1205 "ARRB1 FURIN NBEA"
1206 "FMR1 KBTBD2 KIF1C"
1207 "FCHO1 HIST1H2BN KAT7 RHPN1 VRK3 ZNF524"
1208 "AARSD1 GANC ING4 JADE2 MEAF6"
1209 "ADNP2 C18orf21 CCDC71L JADE1 KDM6B POP5 TFDP1 UPF3A"
1210 "BRD1 JADE3"
1211 "PPCDC THG1L"
1212 "INCENP PHF8"
1213 "CBX5 SUV39H1"
1214 "ATRX DAXX PHIP"
1215 "CENPC CENPH CENPI CENPK CENPL CENPM CENPN CENPO CENPP CENPQ CENPT CENPU CENPW FAM102B ITGB3BP MFHAS1 SGMS2 ZFX"
1216 "FBXL18 MAGEA1 MAGEB3 MAGEB4 SPAG1"
1217 "FAM9A NAP1L2 NAP1L3 ZNF93"
1218 "MTX2 PHKA2"
1219 "PHKB PHKG2"
1220 "IMMT PKP2 SAMM50"
1221 "COX19 NDUFC2"
1222 "CYP51A1 DHRS7 EPHX1 TEX264"
1223 "HMOX2 VKORC1L1"
1224 "EBP LCLAT1 THEM6"
1225 "POR TMED7"
1226 "BCS1L FAM136A RBM38"
1227 "C11orf57 CCDC59"
1228 "COPRS DAZAP2 FNDC3B PLEKHB1 RBFOX2 RBM38 RBMS2"
1229 "IARS2 WDR11"
1230 "C17orf75 FAM91A1"
1231 "ALOX15 BTNL8 ECEL1 GLRA2 GLRB HLA-DQB1 HLA-DRB1 HLA-DRB3 LEPR LRRC24 PSG3"
1232 "GAS6 RTBDN"
1233 "ACADL SYT2"
1234 "SCGB2A1 TSGA13"
1235 "C22orf31 CCDC148 KCNIP1 KCNIP2 KCNIP4 LACRT PRR4 SCGB1D1"
1236 "PNPLA3 THTPA WDR59 ZNF414"
1237 "MIOS SEH1L SESN2 SZT2 WDR24"
1238 "ABCC5 ANGEL1 DEPDC5 NFKBIL1 NHS NPRL2"
1239 "ATP5S LYST"
1240 "C21orf91 RGS19"
1241 "FBXO42 FHL1 MAML1 NOTCH1 RBPJ WDR70"
1242 "BOK ITPR2 TESPA1"
1243 "KLK10 OR6C70"
1244 "CD207 S100A7A SUSD3 UGT1A10 UGT1A7"
1245 "FAM57A HSD11B1 KLK2 NOMO3"
1246 "CCDC148 KCNIP1 KCNIP2 KCNIP4 PRR4 SCGB1D1"
1247 "C17orf105 S100A2"
1248 "CCDC186 COL9A2 FKBPL KIAA2026 PNKP"
1249 "APTX H2AFZ LIG4 POLB TDP1 UVRAG"
1250 "IFFO1 IFFO2 XRCC4"
1251 "HECW1 SMAD2 STXBP4 SUFU WWC2"
1252 "CALCOCO2 SMURF2 USP35"
1253 "MAGI1 MAGI3 RHBDL1 TCL1B"
1254 "FLCN LDLRAD4"
1255 "SMAD3 ZFYVE9"
1256 "GPALPP1 TRIM16 UPF2 UPF3B"
1257 "RBM8A RNF113A SDE2"
1258 "CLK1 CLK2 CLK3 MKRN1"
1259 "CASC3 JMJD6 LSM14B"
1260 "MBNL1 MBNL3"
1261 "KBTBD4 MPG STAP1"
1262 "KLK5 NAT2"
1263 "HINT2 SUCLA2 SUCLG1 SUCLG2"
1264 "ATPIF1 DHRS4 PCK2 TIMM8A"
1265 "ACOX1 MAST2"
1266 "ATXN3 AVL9 KIF16B NFKB2 PRKCQ"
1267 "ANKS1A DEF6"
1268 "GCLC GCLM PLAA"
1269 "CALR3 DUSP6 FAM217B NEU2"
1270 "ICK TIMM10B"
1271 "MT-CO3 MT-ND1"
1272 "CCDC85B VMAC"
1273 "DCAF13 GIGYF1 GPSM1 KCTD3 KIAA1671 NET1 PIKFYVE PRKAG2 RNF187 SHKBP1 WDR83 ZBTB49 ZNF140"
1274 "METTL3 RBM15B"
1275 "HECW1 RNF138 SMAD2 SUFU WWC2"
1276 "CALCOCO2 MAGI3 SMURF2 USP35"
1277 "FLCN LDLRAD4 SMURF1"
1278 "SPIN1 SPIN2B SPIN4 ZGPAT"
1279 "PDK1 PDK2"
1280 "AKT2 SZRD1 UBAC1"
1281 "PIK3CA PIK3CB PIK3R1 PIK3R2 WDR6"
1282 "AKT3 EIF4EBP1"
1283 "PGBD1 ZBED9 ZKSCAN3 ZKSCAN5 ZNF174 ZNF202 ZNF213 ZNF215 ZNF232 ZNF394 ZNF396 ZNF449 ZSCAN16 ZSCAN18 ZSCAN20 ZSCAN21 ZSCAN22 ZSCAN23 ZSCAN29 ZSCAN30 ZSCAN32"
1284 "SCAND1 ZKSCAN4 ZNF197 ZNF24 ZNF26 ZNF263 ZNF397 ZNF444 ZNF446 ZNF496 ZNF500"
1285 "AGBL5 FBXO9 GFOD1 GFOD2 RALGAPA1 RALGAPB"
1286 "BRAP RALGAPA2 SPRTN"
1287 "AATF DDX10 DNTTIP2 DUS3L LRRC41 UTP14A"
1288 "IMP3 MAK16"
1289 "HAUS1 HAUS2 HAUS3 HAUS4 HAUS5 HAUS6"
1290 "HAUS1 HAUS2 HAUS3 HAUS4 HAUS5 HAUS6 HAUS7 HAUS8"
1291 "DCP1A EDC3 PATL1"
1292 "DCP2 EDC4 PNRC1 PPP1R35 ZNF33A"
1293 "DCP1B OTUD5"
1294 "LLGL1 LLGL2 PARD3 PARD6A PARD6B PRKCI WWC1"
1295 "MAPK11 MAPKAPK3 SNX17"
1296 "MAPK14 MAPKAPK2 RPS6KA5"
1297 "MAP2K3 MAP2K6"
1298 "REG1A REG1B"
1299 "KIF26B STKLD1"
1300 "MRPS12 SAMD4B ZNF829"
1301 "CCDC154 GBP7"
1302 "FAM135A NCKAP1L RUFY2 UTP20"
1303 "VPS51 VPS52 VPS53"
1304 "ABI1 EXOC6B RAPGEF2 TSSC1 VPS51 VPS52 VPS53"
1305 "LIPE MGEA5 PXK"
1306 "CLEC11A MYCBP2"
1307 "APC CDH10"
1308 "AMER1 AXIN1 RMND5B"
1309 "DDX20 GEMIN4"
1310 "GEMIN5 GRHL1 KMT2C SLC25A31 SNRPG TUSC2 USP9Y XPOT"
1311 "CAP2 TIMM8B"
1312 "MYLK NCKIPSD PPP1R12B TJP2"
1313 "CCDC127 PLD1"
1314 "ABLIM2 MYH1 MYH3 MYL4"
1315 "ATG10 ATG12 PARP9 PTTG1 USP11"
1316 "ATG10 ATG12 C9orf40 EYA3 POGK SCNM1 TCEAL1 TDP2 USP11 ZUFSP"
1317 "NPRL2 ZNF414"
1318 "GPSM2 ZHX3"
1319 "CEP85 SOX5"
1320 "CLEC12A SOX13"
1321 "EEF1A2 HOMER1 HOMER2 NUDCD3 SPTBN4"
1322 "AGO3 ANKMY2 ATXN3"
1323 "LZTS1 TRAF5 TTLL4"
1324 "ASAP3 ASB6 CEP128 ERF HK2 NFKBIE SNUPN TRMT5"
1325 "BRPF1 MAP3K6 MIB2 NCOA3 SMYD5 XRCC5"
1326 "CDC37L1 FAM103A1"
1327 "ADAR CAAP1 PNISR ZFC3H1"
1328 "DDX52 PHF2 RBM5"
1329 "C6orf136 KIF21A"
1330 "FUCA2 GAA"
1331 "GUSB MEGF8 NAGLU PRCP SCPEP1 SIAE"
1332 "MAN2A1 MGAT5"
1333 "CTSA GLB1 MAN2B2"
1334 "ARSB GALNS MAN2B1"
1335 "ISOC2 PXDN"
1336 "HLA-A HLA-B HLA-C"
1337 "CCDC97 RNPC3 SNRNP35 SNRNP48 ZMAT5 ZRSR2"
1338 "TRPM3 WWC3"
1339 "E2F8 TTC33"
1340 "BHMT TMEM185A"
1341 "CHST1 ELK4 HOXB5 HOXC4 KCTD9 NUP35 S100A7 TRPV5 ULBP2"
1342 "CCNYL1 EFR3B ERICH5 PAG1 UBTD2"
1343 "CST6 ELMOD1 LRRC15"
1344 "DCAF17 RAB40B RAB40C"
1345 "CST6 SPINK5"
1346 "ELMOD1 LRRC15"
1347 "DSG4 PYHIN1 S100A3 SMAD9"
1348 "ATG9B CCDC153 DOLPP1 FAM26D HEPHL1 LACC1 LYG2 NEU2 OR51E2 PADI3 PKP1 TEX35"
1349 "DMKN RBM24 SERPINB13"
1350 "HIST1H2BJ TRMT10B"
1351 "MUM1L1 THSD7B"
1352 "PLCL2 PPP1R3D TANC2"
1353 "PPP1R11 ULK1 ZFYVE16"
1354 "CCDC85B PPP1R3B PPP1R3F PPP1R9A"
1355 "GYS2 PPP1R3C"
1356 "CSRNP2 HOMEZ"
1357 "ACAA2 EPB41 FAHD1 GLS IVD MCCC2 MUT"
1358 "GRPEL1 TIMM44"
1359 "CLPP CLPX PNPT1"
1360 "ATPIF1 DHRS4"
1361 "BCAT2 NADK2 TSFM"
1362 "HIBCH PTRHD1"
1363 "DLGAP4 PPA2"
1364 "ALDH6A1 CPT2"
1365 "KLHL21 RPUSD1 ZBTB44"
1366 "PSG1 PSG3 PSG5 PSG9 SECISBP2L"
1367 "CEP152 GLCCI1"
1368 "ACTN2 ATP6V1D ATP6V1F ATP6V1G1 TPM3"
1369 "FGD4 LIMCH1"
1370 "ATP6V1C2 ATP6V1G2"
1371 "ATRX CBX1 CBX3 CENPV CHAMP1 CHD1 DAXX ESF1 FAM208A IWS1 ORC1 PHIP POGZ RAI1 RPS19BP1 VRK3"
1372 "CASC3 JMJD6 LSM14B MKRN1"
1373 "CRABP2 GM2A ICAM1 PLBD1 POF1B S100A14 S100A16"
1374 "PDIA4 TUBB2B"
1375 "CALR PDIA3"
1376 "HSP90B1 VCP"
1377 "EFR3A FYN"
1378 "LYN RRAS2 YES1"
1379 "GLIPR2 HRAS"
1380 "AIDA TLDC1"
1381 "DNAJC2 FKBP5 HMGA1 PPIL4 TAB1"
1382 "BTF3L4 CCDC124"
1383 "CDNF LYRM2 OXSM SUOX"
1384 "LYRM4 NFS1"
1385 "DHTKD1 PARS2"
1386 "FAM83D OGT TRAK1 TRAK2"
1387 "AXIN1 GSK3A"
1388 "C14orf80 CEBPA"
1389 "FRAT2 NHSL2 SEMA6A WIPF3"
1390 "CEP170 HERC2 SYNE2"
1391 "DUT LDHC"
1392 "IGF2BP2 PRKRA PURA STAU1"
1393 "MKRN2 PABPC1L PAIP1 RALYL"
1394 "CYBA DNAJC19 FAS HACL1 HARS2 TFB2M TMEM201 TRMT11 YIPF6"
1395 "CCDC51 SCO1 UFSP2"
1396 "COMTD1 COX15 EXOG GLCE GNPAT HIGD2A LETMD1 MARC2 MOSPD2 MUL1 PDCD4 PEX19 PEX3 PHKA1 PXMP2 QPCTL"
1397 "ARHGEF37 BIN3 PICK1"
1398 "C6orf226 PEX7"
1399 "AMBRA1 ASB8 CAMKMT HPS1 STK32C"
1400 "BTN3A1 BTN3A2 PEX13"
1401 "ATP6V0D1 CNTN1 DCK DGUOK DNM1 EDIL3 MAP2 SEPT3 VAMP2"
1402 "EPB41L1 PPP3R1"
1403 "ANK2 CDH13 MAPRE3 MAPT NAPB TRIM3"
1404 "AMPH ATP4A CAMKV CLPB CRMP1 DPYSL3 GNAO1 GNG2 KIF5C LSAMP SCAMP5 SNAP25 SNAP91 STX1A STX1B SYN1"
1405 "NUFIP1 PDE2A TRIM2"
1406 "CADM2 CALB2 CAMK2A DCLK1 DCX DPP6 DPYSL4 ELAVL4 GNG3 GPM6A GPM6B GRIA2 HPCA HPCAL4 MAP1LC3B2 NDRG4 NTM PHYHIPL SLC12A5 SNCB SYP SYT1 VSNL1"
1407 "H2AFY NCALD RAB3A"
1408 "ALS2 DNAAF2"
1409 "COL5A1 FRS2 PTPN2"
1410 "BAZ2B BEGAIN OSMR TICRR TTC7A XPR1"
1411 "BPIFB1 TMEM237"
1412 "BMI1 CBX2 CBX4 CBX8 PHC1 PHC2 PHC3 SCML2"
1413 "CBX7 USP20"
1414 "CC2D2A CFAP221 PCDHB4"
1415 "L3MBTL2 MGA MSANTD2 PCGF6 TFDP1 YAF2 ZNF280C"
1416 "FMO1 IQUB RPA4 TULP1"
1417 "CDKN2AIPNL PSRC1"
1418 "CCDC88C NCKAP5L PTEN"
1419 "FAN1 PLEKHA8"
1420 "MAN2A1 MAN2B1"
1421 "ARSA ARSB CLN5 DNAJC3 EDEM3 ERLEC1 GALNS GRN KDELC1 MANBA MANF MGAT1 NHLRC3 OS9 PAM POGLUT1 SDF2 SEL1L SGSH SIAE SIL1 TXNDC16 UGGT2"
1422 "ENTPD6 MBTPS1 MEGF8 SIRPG"
1423 "GUSB NAGLU SCPEP1"
1424 "CEP120 TNIK TRAF3"
1425 "BLZF1 CCDC112 CEP95 IFT81 NBR1 SKI TCHP THAP3 ZMYM6 ZNF865"
1426 "DYRK1B FAM53C"
1427 "CCDC113 CCDC121 HDAC5 LTBR RBCK1 SPATS2 TRAF2"
1428 "HECTD2 RNF166 SHARPIN"
1429 "ARHGEF18 RNF114 RNF31"
1430 "EDA2R TRAF1"
1431 "ABL2 HIVEP2 PYGO2"
1432 "CLMN SSSCA1"
1433 "CHAC2 EFHD1 FSD1 UBE2T"
1434 "STK40 TRIB3"
1435 "DET1 ETV1 FOS"
1436 "FBXO25 UBE2E3"
1437 "HOXB6 HOXC9 MYLK3"
1438 "MAPK11 MAPKAPK3"
1439 "MAP2K3 MAPK14 MAPKAPK2 RPS6KA5"
1440 "CUL7 DUSP16 DUSP7 DUSP9 FBXW8 MKNK2 RNF138"
1441 "LZTR1 NUDT12 VWA8"
1442 "CEP152 CEP63 GLCCI1"
1443 "AMACR BICC1 BTBD7 CBLB CNTLN E2F2 RABGAP1L"
1444 "TMEM5 WAC"
1445 "ELK4 EMC6 MBP PTEN RAD51"
1446 "DOCK6 LRP8 PRKRIP1"
1447 "GPS2 NCOR2"
1448 "CYTH3 PPFIA3"
1449 "ATG4C MAN2C1 RAB3IL1 RAB3IP TMEM102 YDJC"
1450 "AFMID CEP83 GANC MCF2L"
1451 "CEP89 TCEA2"
1452 "JMY NARFL"
1453 "CHFR DTX3"
1454 "ACTG1 VCP"
1455 "CALM1 CAPZA1 CLTC EEF1D"
1456 "BOK ITPR3 TESPA1"
1457 "GLIPR2 GNA11 GNA13 GNAQ RP2"
1458 "KIF23 RACGAP1"
1459 "BST2 FDX1 MYPN NUMBL"
1460 "ARAP1 PHLDB2"
1461 "CCDC28B DR1 HYKK LAGE3 OSGEP TMEM51 TP53RK"
1462 "CCDC18 CEP152 FAM117B GLCCI1 NADK SECISBP2L"
1463 "NEK6 PIK3CD"
1464 "ARAF CCAR1 CDC37 CHUK IKBKB IKBKG"
1465 "FKBP1B NME2 TAGLN3"
1466 "CCDC61 SH3PXD2A"
1467 "PGK2 ZFAND5"
1468 "FAM208B MPHOSPH8 ZNF597"
1469 "INPP4A UBAP2L"
1470 "MAGOHB SARNP"
1471 "DLG3 NTPCR"
1472 "CDK11A SAP30BP"
1473 "SLC25A13 SLC25A18 SLC25A22"
1474 "ALDH3A2 CCDC51 CLPTM1L DPM1 NDUFA4"
1475 "FAF2 SSR1"
1476 "CCDC47 SEC61B"
1477 "CAAP1 PWWP2A"
1478 "BMP1 FARP1"
1479 "PLCD3 RALB RAP2C"
1480 "ITGB4 PDE12"
1481 "CPB2 LXN POU1F1"
1482 "AKAP8 AKAP8L CCAR2 FUBP3 OGT SETD1A WDR82"
1483 "CCDC50 SEC14L1 VANGL1"
1484 "PLD1 TES"
1485 "ARHGAP10 ARHGAP26 C2CD2"
1486 "FOCAD IFRD2 MICALL2"
1487 "IFIH1 TBC1D16 TTC7A"
1488 "KAT6B NHEJ1 TDG"
1489 "DHCR7 PTDSS1"
1490 "DEGS1 RAB9A"
1491 "CORO7 KIAA1958 PGS1"
1492 "CLINT1 CUX1"
1493 "ADD2 ANKRD29"
1494 "CENPA HJURP NOL8 RRP36"
1495 "COA4 DTNB IMPACT MRRF TAOK2"
1496 "SAMD9L USP35"
1497 "GCLC GCLM GSS PLAA"
1498 "LRRC40 PAK2 PDCD5 PPID"
1499 "AARS TBCB"
1500 "C21orf2 DBR1 EIF1AD MPLKIP TNFAIP8"
1501 "FRMD6 KCTD17 KCTD5 PCBP3 POLK PTPN4"
1502 "MTMR6 MTMR9"
1503 "CTC1 TEN1"
1504 "ACYP1 AKT1 ARFIP2 MAP2K4 MTMR2 PAAF1 PPP5C PSMD5 RPS6KA1 VPS39"
1505 "NTRK1 PPEF1 YJEFN3"
1506 "AGO2 PGPEP1"
1507 "DLL4 PACRG TNNT3"
1508 "CTH SPAG7 UAP1L1 ZFAND1"
1509 "HSF2 TTBK2 URM1"
1510 "GIPC2 SH3BP4"
1511 "ESD GPI"
1512 "ACAT2 HEBP2 OXSR1 UBE2D3"
1513 "ALDH9A1 SLC9A3R1"
1514 "SOX14 SOX2 SOX21"
1515 "PPT1 RBP1"
1516 "BACH1 BACH2 MAFF MAFG NFE2L1 NFE2L2 NFE2L3"
1517 "CRYGB CRYGC"
1518 "PVRIG SPCS3"
1519 "SPCS1 SPCS2"
1520 "ATP6V0D2 ATP6V1B1 NCOA7"
1521 "BAX BBC3"
1522 "BCL2 BCL2L1 BCL2L11 RHPN2"
1523 "BAK1 MCL1 STARD9"
1524 "CPTP SMAD5"
1525 "CCDC88C KATNA1 KATNB1 KATNBL1 LATS1"
1526 "APBA1 MPP2 PXDC1 RABGAP1"
1527 "ABLIM2 LIN7B LIN7C MPP6 MPP7"
1528 "CASK MPP5"
1529 "ACSF2 DHRS4L2 GFM1 PEX3"
1530 "ARHGEF26 SIRT3"
1531 "DNPEP PLCD1"
1532 "COL14A1 COL18A1 COL4A2 LDLR PLXNA1 PLXNB1"
1533 "NRP1 PLXNA3"
1534 "ACAD8 AGXT2 HACL1 IP6K3 PCCA SDHAF2 TTC39B VPS13A"
1535 "GPI GRHPR"
1536 "PGM1 PGM3"
1537 "ABHD11 SMAP2 UBE2F"
1538 "DLG4 LDHAL6A NELFCD PPIAL4D SYNPO2 TIA1 TMEM168"
1539 "UBE2D4 ZC3H6"
1540 "PHIP RLF SUV39H1"
1541 "AHDC1 ATRX CBX1 CBX3 CBX5 CENPV CHD1 DAXX IWS1 ORC1 RPS19BP1 RSF1"
1542 "HDGF PRKD1"
1543 "IMPA1 SAE1 SUMO3 UBA2"
1544 "IPMK UBE2I"
1545 "LCMT1 UAP1L1"
1546 "CTH SPAG7 SZRD1 UAP1L1 ZFAND1"
1547 "CSRP1 HEBP1 LASP1"
1548 "ACTN1 PDLIM1 PDLIM5"
1549 "ACTN3 ZNF706"
1550 "GFER NDUFAF6"
1551 "PBLD ZRANB1"
1552 "ITLN1 ITLN2"
1553 "CYP2C18 CYP2C9 MYLK2 TMEM260"
1554 "DOCK1 DOCK3 DOCK5 ELMO1"
1555 "FCN1 FCN2"
1556 "ABCA5 C14orf80 CCDC183 FOXP1 MEX3B TMF1 TNFAIP8L1 TRAK2"
1557 "CEBPA RUNDC1"
1558 "C21orf59 DHFR"
1559 "IREB2 KTI12 MTMR2"
1560 "DUSP12 KRIT1"
1561 "MAGEA4 MAGEB16 MDM1"
1562 "CCDC106 MAGEA9B"
1563 "DFFA TSPYL4"
1564 "SNAPC1 SNAPC2 SNAPC3 SNAPC4 SNAPC5"
1565 "KCTD13 PRPF39 TRNAU1AP"
1566 "KCTD13 PBX2 PBX4 PKNOX1"
1567 "KCTD10 ZFAND2B"
1568 "PRPF39 TRNAU1AP"
1569 "LDB1 LMX1B MAB21L1 MAB21L2 MEIS1 MEIS2 MEIS3 PBX1 PBX3 PIGL"
1570 "KATNA1 KATNB1 KATNBL1 LATS1"
1571 "NUFIP2 YTHDF3"
1572 "COQ3 COQ6 HAGH"
1573 "ALG11 C3orf33 EI24 MUL1 PEX16 TMEM143"
1574 "AGPAT3 COMTD1 COX15 EXOG GLCE HIGD2A MARC2 MOSPD2 NAT14 PDCD4 PEX19 PEX3 PXMP2 QPCTL SCO1"
1575 "ABCD1 GNPAT TRABD"
1576 "LETMD1 OMA1 TMEM120A TMEM126A"
1577 "ATP9A DPY19L3 GHITM RMND1"
1578 "DGAT1 FITM2"
1579 "HSPB11 RRM1 RRM2"
1580 "RRM2B TRIM5"
1581 "PAK1 PPAT"
1582 "COL14A1 COL18A1 COL4A2 NRP1 PLXNB1"
1583 "PLXNA1 PLXNA3"
1584 "ADAM15 ATF6 CHPF EXT2"
1585 "DNAH3 FXR1 KIF1C"
1586 "CPNE8 GLOD4 TPD52"
1587 "CRY2 PER3 STOX2"
1588 "SNX22 SNX24"
1589 "DZANK1 LPO TEKT4"
1590 "FAN1 MLH1 PMS1 PMS2"
1591 "BCAP31 ENDOD1 GNAI1 TMEM109"
1592 "CISD2 VAPB"
1593 "DYNLL1 UHRF1BP1L"
1594 "EEFSEC LARP4B MTPAP PNO1 TCF25"
1595 "NOB1 WDR6"
1596 "C12orf43 LSG1"
1597 "BCCIP DDX47 EIF1AX EMG1 GTPBP10 MPG MUS81 NPM3 ZNF622"
1598 "SPATA5 TRMT112"
1599 "AAMP AVEN NTHL1 ZC3H7A"
1600 "ATXN2 YTHDF1"
1601 "DNAJB11 SDF2L1"
1602 "PNMA6A WDFY2"
1603 "BRDT CROT KLHDC4 USP25"
1604 "MORC1 MORC2 PSTPIP1"
1605 "BCL10 DNMBP NBEA SH3D19"
1606 "CACYBP FBXL15 FBXO45 KPNA2 NEDD8 SKP1 TLN2"
1607 "BAX BBC3 BCL2L1 DCLRE1A SPRYD3"
1608 "BAK1 BCL2 BCL2L11 MCL1 RHPN2"
1609 "BTRC CDC25B FBXL15 FBXL8 FBXO9 FBXW11 FBXW2 SMARCAL1"
1610 "FBXL16 FBXO31 FBXW5 FBXW9"
1611 "FBXL18 MAGEB3"
1612 "FAHD2A FAHD2B"
1613 "STX8 VAMP4"
1614 "BNIP1 NBAS SCFD2 STX18 USE1"
1615 "BET1 GOSR1 GOSR2 STX16 STX6 VTI1A VTI1B"
1616 "STX12 STX7"
1617 "SNAP23 VAMP3 VAMP8"
1618 "STX4 VAMP7"
1619 "FOXP1 TMF1 TNFAIP8L1"
1620 "C14orf80 CCDC183 CEBPA RUNDC1"
1621 "DCUN1D1 HSPBP1 NMD3 PPP2R5D TTC27"
1622 "NEK7 NEK9"
1623 "BCL9L CASP6 CMTR2 DPYD"
1624 "ALKBH3 DPH5 RPS6KB1"
1625 "CBR1 CBR3"
1626 "BET1 STX6"
1627 "SNAP23 STX8 VAMP3 VAMP8"
1628 "NGDN NOL11 WDR43 WDR75"
1629 "CD200R1 TCP10 TCP10L2"
1630 "CLSTN2 MMP10 MMP3"
1631 "CALML5 SERPINB12"
1632 "SERPINB3 TGM3"
1633 "ACOX1 S100A7"
1634 "IL36G POF1B SERPINB3 SERPINB4 SULT2B1"
1635 "IVL KLK10"
1636 "ALOX12B ALOXE3 CAPNS2 CIDEA CPA4 DPPA4 GLIPR1 GSDMA HAL KLK7 NCCRP1 PKP1 PLCZ1 SDR9C7 SERPINA12 SERPINB13 TGM1 TGM3"
1637 "APOBEC3A B3GALNT1 CST2 FLG2 HLA-DQA2 IL36RN KIR3DS1 LOR PLK2 RNASE7 SERPINB7"
1638 "ASPRV1 ELMOD3 FLG GPR18 TGM5"
1639 "TREX2 ZNF215 ZSCAN23"
1640 "A2ML1 S100A2"
1641 "DMC1 GALNT18 HTRA3 TMEM25"
1642 "FUZ INTU RSG1"
1643 "B4GALNT4 GDF11"
1644 "C3orf52 LIPH"
1645 "DPM3 NRIP3"
1646 "C1orf198 DMTN TRAPPC10 TRAPPC9 UBR1"
1647 "BCL2L14 C7orf43"
1648 "CASP2 CNN2 UBR1 UBR2"
1649 "UBE2E2 USP8"
1650 "CALCOCO2 TANK"
1651 "PDXP YKT6"
1652 "DDAH1 S100A13"
1653 "CRK DOCK1"
1654 "C1orf123 CDV3"
1655 "AATF IMP3 ZBTB11"
1656 "CTCF DHX37 DHX57 KRI1"
1657 "DDX10 MAK16"
1658 "GALNT4 TGOLN2"
1659 "ABHD17A LMBRD2 TCTEX1D2 TM7SF2"
1660 "SMURF2 USP35 WWC2"
1661 "MAGI2 RHBDL1"
1662 "MAGI1 MAGI3 TCL1B"
1663 "GLRX2 TACO1"
1664 "ACAD10 AGPAT5 NDRG3"
1665 "HDHD3 TRNT1"
1666 "HACL1 ISCU NDUFAF7 NUDT19"
1667 "PEX1 PEX6"
1668 "COQ5 GPD1L THNSL1"
1669 "C17orf75 CHD1L NFXL1 OARD1"
1670 "NAA38 TRUB1 TXLNG"
1671 "C1QTNF9 C1QTNF9B"
1672 "C1QTNF3 PLOD2"
1673 "IL6ST OSM"
1674 "INSRR TRPM3 WWC3 ZMAT5"
1675 "RANBP17 TRIM35 ZNF121 ZNF624"
1676 "ZNF184 ZNF771"
1677 "KLHL41 TRIM10"
1678 "FAM193B TRIM44"
1679 "NT5DC1 PKLR"
1680 "PMM2 TPMT"
1681 "CASP7 GALE GALK2 TP53I3"
1682 "PHYKPL PMM1"
1683 "GALE GALK2 NT5DC1 TP53I3"
1684 "GGA2 MMP15"
1685 "CLEC16A HADH"
1686 "AASDHPPT HDDC3 HK2"
1687 "CTSD PPCS"
1688 "AFF1 AFF4 ASPM CABIN1 CCNT2 EAF1 EAF2 ELL ELL2 ELL3 ICE1 MLLT1 MLLT3 NFKBIL1 TAF13 TAF1A TAF1B TAF1C TAF1D USPL1"
1689 "BRAP KLHDC3"
1690 "AKAP14 ROPN1L SPA17"
1691 "MMP2 NME8 TTC29"
1692 "PSG1 PSG3 PSG5 PSG9"
1693 "CCDC90B MCUR1"
1694 "ART5 NELL2"
1695 "LTBP3 THBS1 THBS3"
1696 "C1QL4 CNTNAP3B LINGO1 NRSN2 NXPH4 SBK2 ST6GALNAC3 SULF2 ZPBP2"
1697 "COLEC11 COLGALT2 TMEM255A"
1698 "AMIGO1 B4GALNT1"
1699 "EMID1 KLHL25"
1700 "KCMF1 PELI3 UBR4 VMA21"
1701 "AP3B2 AP3M2"
1702 "BPIFA2 CRNN CST2 CST4 KIR2DS2 KIR3DL1 RCAN2 SPRR3 ZG16B"
1703 "CST1 SMR3B"
1704 "CAMK1G MUC7 UCP2"
1705 "CCDC146 GNB3 MAP1LC3C NAGS"
1706 "BIRC6 MICU2 TBC1D22A"
1707 "AGPAT5 DOCK6 HAX1 MT-ATP6 NUDT18 SEMA3B SLC33A1"
1708 "ALG2 LPGAT1"
1709 "CEPT1 CHCHD4"
1710 "GTPBP10 PCBP4 TFB1M"
1711 "CGGBP1 MRM1 WDR20"
1712 "ABCD3 ATP2A2 RPN2 SACM1L TMED10 TMEM43"
1713 "CHCHD3 PHB PHB2 STOML2 VDAC1 VDAC2 VDAC3"
1714 "TMED2 TMED3 TMED4 TMED9"
1715 "DDOST RPN1 STT3A STT3B"
1716 "CAV1 CKAP4 DHCR7 ERLIN1 ERLIN2 ERMP1 KTN1 MBOAT7 SOAT1 TAP1"
1717 "MST1R PIK3C2G SPRED2 UBE3B WIPF2"
1718 "ANKRD16 KIF21B OXNAD1"
1719 "R3HCC1 TRIM14"
1720 "ASRGL1 PDE8B"
1721 "IFI44L IFNA14 IFNA17 IFNA2 IFNA4 IFNA5 IFNA6"
1722 "IFNA13 IFNA8"
1723 "RBM18 UBR3"
1724 "IFI44L IFNA13 IFNA14 IFNA17 IFNA4 IFNA5 IFNA6"
1725 "CALML5 S100A7 SBSN SERPINB12"
1726 "KPRP NCCRP1"
1727 "ANKRD50 ARL13B DUS4L"
1728 "OAZ1 ODC1"
1729 "AZIN1 OAZ2"
1730 "CHTF8 IL36A UBA1"
1731 "ERLEC1 GALNT7 IMPAD1 MGAT1 OS9 PAM SEL1L"
1732 "ARSA ARSB GALNS GLB1 MAN2B1 NHLRC3"
1733 "GUSB MAN2A1 MANBA MEGF8 NAGLU SCPEP1 SIAE"
1734 "GRN SGSH"
1735 "CLN5 SIL1"
1736 "ALDH3B1 TIMM17A"
1737 "ATF6 PLEKHA3 TMEM131"
1738 "ABCB7 ABCC1 C1orf27 GGCX KCNK1 MARC1 SLC26A6"
1739 "CIPC CLOCK FNIP1"
1740 "MOAP1 PNMA1"
1741 "LSM10 LSM11"
1742 "AASDH GPSM2 SASS6 ZHX3"
1743 "CCDC97 RNPC3 SNRNP35 SNRNP48 TTC33 ZMAT5 ZRSR2"
1744 "AKIP1 CEP44 CNKSR3 POC1B"
1745 "DDX11 SMG9"
1746 "GALNT18 HTRA3 TMEM25"
1747 "MGAT4B PLAUR"
1748 "BMP7 BMP8B"
1749 "CHSY3 CMTM8 CNTNAP3B PLAT SBK2"
1750 "B4GALNT4 GDF11 LIPH"
1751 "ADAM11 ADAMTS2 HAPLN3 PCSK5 VWDE ZNF589"
1752 "HOXD13 KLK15"
1753 "DUT GSPT1 LDHC"
1754 "KIF18B NPAT"
1755 "C11orf58 SP100"
1756 "CPB2 LXN WDR82"
1757 "AKAP8 AKAP8L CCAR2 FUBP3 OGT SETD1A"
1758 "HIVEP3 TUB"
1759 "DOPEY1 PLCB2"
1760 "HIVEP2 ZDBF2"
1761 "SSX2 SSX3"
1762 "R3HDM2 STAT5A"
1763 "MAGEA4 MAGEB16 MDM1 TSPYL4"
1764 "VEGFA VEGFB"
1765 "KCNIP1 KCNIP2 KCNIP4"
1766 "HLA-DMB HLA-DRA HLA-DRB5 KLK4 LCN2 PHOSPHO1"
1767 "CCDC148 CD207 PRR4 S100A7A SCGB1D1 SUSD3"
1768 "CTPS2 TSPAN15"
1769 "AAGAB OSTM1"
1770 "NT5E SAR1B"
1771 "FAM177A1 FAM204A"
1772 "SNX5 SNX6 UBA6"
1773 "VPS29 VPS35"
1774 "SNX1 SNX2"
1775 "SNX27 VPS26B"
1776 "OSBP SNX3"
1777 "SMS UCHL3"
1778 "ATXN2 AVEN DHX29 EEFSEC FOCAD GTPBP1 SPATA5 YTHDF1 ZC3H7A"
1779 "EIF1AX EMG1 LARP4B NPM3 ZNF622"
1780 "SPATA5L1 TCF25"
1781 "TRMT112 YTHDF3"
1782 "FRMD6 RASSF8"
1783 "SUMO2 ZNF512B"
1784 "BCL9L BLOC1S6 PDZD4"
1785 "C11orf84 SPIN1 SPIN2B SPIN4 TOPORS"
1786 "DPP8 LONP2"
1787 "GSK3B L1CAM NBPF3 PPP3R1 RRNAD1"
1788 "GSK3A NFATC1 NFATC4 PPP3CC RCAN1 RCAN3 SMYD3 WDSUB1"
1789 "CCDC92 NFATC3 PPP3CB"
1790 "KIAA0930 KLHL11"
1791 "CC2D1B EXPH5 PAX3 PTOV1 SKAP1 SKAP2"
1792 "ADNP CHAMP1 POGZ"
1793 "FAM172A FGL1 GTF2H1 LCMT2 MMADHC PRR12"
1794 "BRAP HEATR3 MTMR1 NR3C1"
1795 "RAVER2 TLE1 TLE3 TRAF3IP2"
1796 "AMMECR1L C16orf59 KLF13 TUBD1 TUBE1"
1797 "DCAF16 NAA30 OGFOD1"
1798 "CHCHD1 HTRA2 MCAT NAP1L5"
1799 "TIMM17B WARS2"
1800 "ACRBP ATL2 EMC3 IDH2 LPCAT3 SYNGR3"
1801 "CT45A10 EMC1 EMC10 EMC4 EMC6 EMC7 EMC8 KCNK16 MMGT1"
1802 "COX7A2L UQCR10"
1803 "SLC8A2 SLC8A3"
1804 "CCDC124 GPRASP2 SPATA5 TCF25"
1805 "CMTR1 CWF19L1 TBC1D2B"
1806 "AAMP ACE2"
1807 "NTAN1 RIPK1"
1808 "ESYT2 SLC35E1 SLC35F6 SLC39A7 TMEM106B"
1809 "CD1B FCGRT"
1810 "IFIT3 ITFG1 ITGB5 TMEM30A"
1811 "HSPA13 TOR1B"
1812 "HLA-A HLA-C"
1813 "C12orf43 CHTF18 GTPBP10 HJURP IBTK LIG1 MPG NOL6 NOL7 NTHL1 PNO1 RFC1 TSR3 UHRF1 USP36 WDR74"
1814 "CHTF8 DSCC1 RFC2 RFC3 RFC4 RFC5"
1815 "ADARB1 ERCC3 GTF2H1 GTF2H3 GTF2H4 MNAT1 WDR55"
1816 "POP7 RPP25L"
1817 "EMG1 ZNF622"
1818 "DDX47 GNL3L"
1819 "DDX55 DHX33 NVL"
1820 "AAMP DNAJC21"
1821 "CGGBP1 MRM1"
1822 "IMP4 UTP23"
1823 "AVEN FOCAD IFRD2"
1824 "BRD1 JADE3 RNPC3 SIRT7"
1825 "ERCC6 FBXL6 MUS81"
1826 "MROH6 RET RYR2 SPTBN2"
1827 "KRT16 KRT17 KRT6C KRT79 KRT8"
1828 "KRT12 KRT72 KRT77 TCHH"
1829 "KRT73 TTLL7"
1830 "KRT10 KRT5 SALL4"
1831 "KRT4 KRT82"
1832 "ISOC1 ME1 SERPINB9"
1833 "UBE2K UBE2N UBE2V1"
1834 "ITPA TXNDC17"
1835 "GPD1L ITPA LTA4H NANS OXSR1 PEF1 PREP RNPEP TSTA3"
1836 "ME1 PLAA"
1837 "IRGQ PGP"
1838 "LSR OCLN"
1839 "B3GNT2 C1GALT1C1"
1840 "BLM DHX40 HIRIP3 TJP1 TRIP13 UBE2E2"
1841 "DPP3 IAH1 MAT2A MAT2B PDXK"
1842 "HBS1L PPM1A PPM1B"
1843 "EBP PTPN1 STIM1"
1844 "HMOX2 LCLAT1 MARCH5 POTEE"
1845 "CLPTM1 SEC63"
1846 "SEC62 TOMM40 TRABD"
1847 "FERMT2 MAPK3"
1848 "CYLD DHPS"
1849 "GLUD1 PDHB"
1850 "DBT DLAT DLD DLST OGDH PDHA1 PDHX"
1851 "CISD1 COX7A2 MGST3"
1852 "B4GALT5 CALCB GINM1 INHBA ITGB8 RCHY1 TPST1"
1853 "HM13 INHBA RBFOX3 SLC38A6"
1854 "FUT9 GLRB LINGO2 ZBTB7C"
1855 "BTNL8 LEPR"
1856 "ARHGEF38 LINGO3 NLRP5 TTLL9"
1857 "ALG10 APH1A ATP7B B3GALT6 CERS6 CHPF DGAT1 FAM69A KPNA5 PGAP1 POMGNT1 SEL1L3 SLC12A9 SLC19A2 SLC25A16 SLC5A3 SLC7A6 TMEM120B TMEM246 TMEM67 TTC13"
1858 "AGPAT1 ENTPD6"
1859 "LRIG1 PIGQ"
1860 "ATF6 TMEM131"
1861 "ALG8 C3orf33 CHPT1 FITM2 MFSD3 MRS2 NAT14 OMA1 RETSAT RMND1 SC5D SLC22A18 SLC30A5 SLC39A3 TMEM143 TMEM160 TMEM161B TMEM186 TMEM63B"
1862 "ADAM15 ASIC1 ATP13A2 B4GALT3 BTN2A1 CD1B CHRNA5 CLGN CLN3 CLSTN3 CYB5D2 DHRS13 DNAJB14 DPY19L4 EDEM1 EDEM2 EXT1 EXT2 FAM3A FCGRT FZD6 GALNT1 GALNT11 GALNT12 GPX8 HLA-DRA HLA-E HLA-F HLA-G ITGA7 MCOLN1 MFGE8 MGRN1 MR1 NR2F1 PIGX PON2 RFT1 SARAF SCARB1 SLC25A23 SLC25A29 SLC37A4 SLC41A3 SLC43A1 TMEM106B TTC17 TXNDC11 UGT8 XXYLT1"
1863 "B3GALNT2 CHPF2 KDELC1 LOXL2 NDST1 OS9 P3H3 SGSH TAZ TOR3A UGGT2"
1864 "ANKRD46 B4GALT4 CERCAM CLN5 FOXRED2 FRAS1 FUT11 IDS IL17RA LRP5 LRP6 MANEAL MICA NDST2 P3H4 PCSK6 PLAUR ST3GAL4 SUMF1 WNT5A ZRANB3"
1865 "PIGB POMK SLC35F2 TMBIM6 USP30"
1866 "ABCA2 ARSK CACNA2D2 CHID1 CHST10 COCH DYNC2LI1 FAM118A LMLN LRIG2 MBTPS1 PAM PDSS1 PLXNA3 SLIT2 TXNDC16"
1867 "ABHD3 ALG6 ATF6B B4GALT7 BMPR1A BTN2A2 C1orf112 C1orf43 C6orf120 CCPG1 CDC6 CELSR1 CHRNA9 CHST12 CHSY1 CNNM1 CNNM2 CNTNAP3 CSGALNACT2 CTDNEP1 DERL2 DNAJB9 DNAJC16 EIF2AK3 ENTPD4 EXTL3 FAM69B FUT8 FZD2 GALNT13 GCNT1 GINM1 GRAMD1A HMGCR HS6ST2 ITPRIP KIAA0922 LGR4 LRFN3 LRIG3 LRP11 MANEA METTL25 METTL9 MFAP3 NEK4 NETO2 NR2F2 NUS1 OSBP2 PDE3B PI4K2B PIGA PIGG PLEKHH3 POMGNT2 POMT1 POMT2 PSEN2 PTCH1 PXYLP1 RHBDD1 RHBDD3 RNF130 SCAP SEMA4C SERAC1 SGCB SLC25A33 SLC38A9 SPPL2B SREBF2 ST7 ST8SIA4 TCTN2 TCTN3 TM2D3 TMEM104 TMEM106C TMEM161A TMEM179B TMEM181 TMEM206 TMEM219 TMEM231 TMEM39B TMEM8A TMTC4 TYW1 UBXN8 ULBP3 VANGL2"
1868 "ABCA3 FKRP"
1869 "ATP8B2 ITPRIPL2 LRP10 SLC46A1"
1870 "ARL6IP6 ARV1 CERS5 LMBR1"
1871 "ELOVL4 SIDT2 TMEM68"
1872 "C4orf32 REEP6"
1873 "AGPAT4 SLC47A1 USP3 ZDHHC6"
1874 "ITGAV PLXNA1"
1875 "C1GALT1 CD27 CD70 SLC25A51"
1876 "DCBLD1 FGFRL1 FKTN FUT4 IL27RA SEC61A2 TNFSF9"
1877 "CXCR4 SGPP1"
1878 "PIGW SLC39A4"
1879 "FAM8A1 GJC1 MBTPS2 MFSD8 TMPPE TYRO3 ZDHHC18"
1880 "FAM120C GNL3L TARBP1 ZCCHC6"
1881 "ANKRD17 ATXN2 YTHDF1"
1882 "HELZ PUM1"
1883 "BCKDK GLUD1 L2HGDH METTL21C"
1884 "ACSL1 IDH3B IDH3G RDH13"
1885 "DBT PPM1K"
1886 "IFI35 NMI"
1887 "C8orf82 ZNF557"
1888 "ATG10 ATG12"
1889 "SNX22 SNX24 TBX20"
1890 "AMER1 C1orf226 CRY1 CRY2 FAM199X GULP1 KIAA0232 NAGPA PER1 REXO1 STOX2"
1891 "HIPK2 RAVER2 SATB1 TLE1 TLE4 TRAF3IP2"
1892 "CXorf58 HOXA1"
1893 "DNASE1L2 FAM212B"
1894 "MIDN ZNF19 ZNF561"
1895 "PRAME RNF187 TRIM41 ZNF562"
1896 "MDM2 TRIM39 ZNF419 ZNF621"
1897 "IGF2BP2 PRPSAP1 PURA"
1898 "PRPS1 PRPS2 PRPSAP2"
1899 "LIN28B THAP7"
1900 "APBA3 GK5 RFX1 RFX2 WDR73"
1901 "PSMG3 RNF181"
1902 "FKBP2 NENF POFUT1 RAB9B"
1903 "CCZ1 POGLUT1"
1904 "MANF PDIA5"
1905 "GSTK1 ZMPSTE24"
1906 "HSPA13 ITFG1 ITGB5 TOR1B"
1907 "LGALS7 LPCAT2 LRRC8A"
1908 "CNNM3 QSOX2"
1909 "AHNAK2 HMCES"
1910 "CNTROB NFIB RTN4IP1"
1911 "GALNS MAN2A1"
1912 "ARSA CLN5 DNAJC3 EDEM3 ERLEC1 GALNT7 GRN KDELC1 MAN2B1 MANBA MGAT1 NHLRC3 OS9 PAM POGLUT1 SDF2 SEL1L SGSH SIAE SIL1 UGGT2"
1913 "GUSB MEGF8 NAGLU SCPEP1"
1914 "LAMA3 MBTPS1 TAZ TXNDC16"
1915 "ARSB GLB1 MAN2B2"
1916 "FREM2 GALNT18"
1917 "ARSA ZBTB43"
1918 "CASC4 EFCAB14 GRAMD1B GRAMD3 MARCH5"
1919 "ACADSB GRPEL1 OAT TIMM44"
1920 "HDHD3 TACO1 TRNT1"
1921 "LIPA PCK2"
1922 "ARL6IP1 METTL7B"
1923 "AGPAT3 THNSL1"
1924 "FAM210B SH3PXD2A"
1925 "FAM120C HELZ PUM1"
1926 "LGALS7 PREB"
1927 "DPP9 PAFAH1B3 PDCL3 RABGGTA"
1928 "MGMT PFDN1 PFDN5 VBP1"
1929 "PAFAH1B1 PAFAH1B2"
1930 "GLRX3 PITHD1 SGTA"
1931 "LMBR1L SLC9C1"
1932 "KIAA1324L NACA2 NXF5 SMTNL1"
1933 "FAM184B OR8H3"
1934 "E2F1 E2F2 E2F3 E2F4 E2F5 TFDP2"
1935 "DNAJC12 SHROOM1 SLC7A6OS"
1936 "GK5 KLHDC2 PPM1E WDR73"
1937 "ANTXR1 SH2D4A"
1938 "AAR2 DVL3 EAPP ECD KLHL36 RGPD3 TSSC4 ZNHIT2"
1939 "ABHD17B ARIH2 CCDC127 CHCHD6 MTX2 MTX3"
1940 "FBXL20 RMDN2 TRMT2B"
1941 "EFCAB7 RFFL RNF34 SHC1"
1942 "IQCE TTC23L"
1943 "SDSL SULT1A1 SULT1A2"
1944 "C11orf68 EXO1 FGF10 HNRNPA1L2 MYEF2 PRPF40B SCML1"
1945 "CLASP2 MARK2"
1946 "CREB3 CREB3L2 PDGFC"
1947 "FGFR3 SNX11"
1948 "SFR1 ZNHIT2"
1949 "AAR2 DVL3 EAPP ECD KLHL36 SLC7A6OS TSSC4"
1950 "CAPS EML6"
1951 "COX20 EML1 PPM1E"
1952 "FAM111A IBTK"
1953 "WDR20 WDR48"
1954 "CYP27A1 UGT1A9"
1955 "ANKS1B NAE1 PFKFB4"
1956 "GNG7 OGDHL"
1957 "CCDC106 FAM216A FOXJ2 MAGEA10 MAGEB16 NCOA2 NRIP1 POU2F1"
1958 "MAGEA4 MDM1 TSPYL4"
1959 "HARS2 MICAL1 SARS2 WDR11"
1960 "FASTKD1 TRMT11"
1961 "AKTIP DYM FAM160A1 FAM160A2 HOOK3 TRIM32 TSC1"
1962 "ATF2 ATF7 FOS FOSL2 JUNB JUND"
1963 "ATF3 CREB5 JUN"
1964 "ATF1 CREB1"
1965 "GTF2IRD1 HEXA MSH5 PFKFB4 PLXNB1 PNPLA8 SGTB"
1966 "GTF2IRD2 GTF2IRD2B"
1967 "ARSB GALNS SGSH"
1968 "ARSA GRN GUSB KDELC1 MANBA MEGF8 NAGLU NHLRC3 OS9 PRCP SCPEP1 SIAE UGGT2"
1969 "POFUT1 POGLUT1"
1970 "EDEM3 POLDIP2"
1971 "CLN5 MAN2B1 SIL1"
1972 "ACOT13 ANKRD13A CGN NUDT8"
1973 "SBDS TXNDC12"
1974 "FYCO1 MLYCD"
1975 "AP2A2 AP2S1 MAGED1 MIS18BP1 REPS2"
1976 "CENPC DUSP11 FCF1 RPF1 SRFBP1 WDR76 ZNF277"
1977 "CENPA NOL8"
1978 "AGAP1 RASA2 SEMA6A WIPF3"
1979 "GCNT1 PTCH1 ST8SIA4"
1980 "FRAT2 NHSL2"
1981 "HMGN5 NAA11 NAA50 TTK"
1982 "KDELR2 KLK11 SLC16A13"
1983 "DOLK GALNT8"
1984 "STAT6 TSC22D1"
1985 "APIP NRBP1 TSC22D2 TSC22D4 TTL WNK2"
1986 "PRKD2 PRKD3"
1987 "ECT2 NUDT5 SIK2 ZNF746"
1988 "SKA1 SKA2 SKA3"
1989 "TEAD1 TEAD2 TEAD3 TEAD4 VGLL4 WWTR1"
1990 "ELOF1 POLH"
1991 "CCDC71L SIRT7"
1992 "ATP13A3 ITGA3 TMEM63A"
1993 "TALDO1 TKT"
1994 "DMTN TRAPPC10"
1995 "MIEN1 MTMR12 UBAC1 UBLCP1"
1996 "CAPN3 PCID2 WNT10A"
1997 "FAM216A FOXJ2 MAGEA10 MAGEA4 MAGEB16 NCOA2 NRIP1 POU2F1"
1998 "RAD51B RAD51D"
1999 "ZBTB10 ZNF331 ZNF7"
2000 "BPHL GPANK1 TTC19"
2001 "KIF3A KIF3B KIFAP3"
2002 "AKR1C2 AKR1D1"
2003 "ADSSL1 UFM1"
2004 "EIF4E3 THEMIS2"
2005 "ARSB GALNS"
2006 "MAN2B1 MANBA NAGLU PRCP"
2007 "AUNIP AURKA C2orf49 CEP192 ITPKC MTMR4 OSBPL6 TPX2"
2008 "C2orf49 C9orf40 CHEK1 EYA3 GPSM2 HOXB9 KDM3A POGK PTBP3 SASS6 SCNM1 TCEAL1 TDP2 TIPIN ZHX3 ZNF703 ZUFSP"
2009 "AK8 TTBK1"
2010 "ANKRD24 DSCAML1"
2011 "LIN37 LIN52 LIN54 MYBL1 MYBL2"
2012 "OPTN STX3 STXBP5 TBC1D17"
2013 "AIP RNPEP TSTA3"
2014 "ABCE1 GARS IDE"
2015 "CDRT15 CDRT15L2"
2016 "COX15 MTFP1 PXMP2 SLC25A46"
2017 "ICMT ROMO1 SFXN4 TIMMDC1 YME1L1"
2018 "COMTD1 EXOG GLCE HIGD2A MARC2 MOSPD2 MUL1 PDCD4 PEX19 PEX3 QPCTL SCO1"
2019 "PTDSS2 TMEM87A"
2020 "CD74 TM4SF20"
2021 "MB21D1 PWWP2B"
2022 "BRPF1 GATC TBC1D22B"
2023 "HEY1 HEY2"
2024 "CERS2 CTAG2 CXADR KDSR"
2025 "ABCB8 MT-ND1 MT-ND2"
2026 "DCAF4L2 PYGL"
2027 "CD96 FAT1 FBN2 FRAS1"
2028 "GGNBP2 ZFP41"
2029 "C18orf25 CTSK"
2030 "FKBP14 IDS"
2031 "SIAH1 SIAH2"
2032 "ARSA SUMF1 ZBTB43"
2033 "FBXO21 TCAIM"
2034 "CBWD5 DNLZ"
2035 "SERPINB11 STC2"
2036 "BRD4 UIMC1"
2037 "PAX9 SNX13"
2038 "CLP1 MOB3A TEX30 TSEN34 ZCCHC11"
2039 "AMMECR1 TSEN54 ZNRF1"
2040 "DOK2 TSEN2 TXNL4B"
2041 "EIF1AY JAKMIP1"
2042 "CADPS CLIP1"
2043 "MYOF PIEZO1"
2044 "TAP1 TAP2"
2045 "GOT1 PEBP1"
2046 "AKR1B1 GLO1"
2047 "NIT2 SORD"
2048 "MICALL2 RASIP1 SORBS3"
2049 "BCKDHA BCKDHB GCSH PDK2 PPM1K"
2050 "C6orf106 TRIM36"
2051 "ALDH3A1 C14orf159 PCBP4 PPIAL4D UPP1 VAV3"
2052 "AP4B1 RPS6KB2"
2053 "AP4E1 AP4M1 AP4S1 SUV39H2"
2054 "TRIM38 USP13 ZFPM1 ZFYVE26"
2055 "ALDH9A1 ESD EZR GPI PGK1 SLC9A3R1"
2056 "ANXA5 CNDP2"
2057 "ADH5 ASS1 IDH1"
2058 "C17orf75 FAM91A1 WDR11"
2059 "ALDH3A2 DPM1 NDUFA4"
2060 "BCCIP PAPD4"
2061 "PDS5A PDS5B SMC1B"
2062 "CDCA5 RAD21 STAG1 STAG2"
2063 "ADNP MBD2 SMC1A SMC3"
2064 "NSUN2 YTHDF2"
2065 "CLIC3 NKIRAS1"
2066 "DLGAP5 RGPD3"
2067 "AAR2 NCDN"
2068 "ATXN3 DVL3 EAPP ECD KLHL36 SLC7A6OS TSSC4"
2069 "ARAP1 PDPK1 PHLDB1 SIRT2 TMEM263 TRIM4 UPF2"
2070 "ARFGAP2 DCPS MAPK3 NUDCD3 PPAT PTER"
2071 "BRIP1 POMK SLC35F2"
2072 "ABHD16A AMIGO1 ATP1A4 DGCR2 EDA ENTPD7 FAM189B FGFR2 GABRB3 GABRE HTR3C ITPRIPL1 JAG2 KCNJ8 KCNQ5 MCOLN2 MCOLN3 NOMO3 NXPE3 PIGM PKDCC PTH1R S1PR2 SCARF2 SEMA4F SLC35F5 TMEFF1 TMEM59L UGT3A2 ZACN"
2073 "ATP5G1 TNFSF11"
2074 "CCDC71L DNAJC6 JADE1 KDM6B UPF3A"
2075 "RPGRIP1L WDSUB1"
2076 "PPCDC STK38L UBE2G1"
2077 "MMAA PHYKPL RBKS ZADH2"
2078 "ACOX3 IVNS1ABP PTP4A2 SIRT3 SPATA20"
2079 "BCKDHA BCKDHB GCSH PPM1K"
2080 "ARL5B SLC19A1"
2081 "EFCAB7 IQCE RFFL RNF34 SHC1"
2082 "ABHD17A LMBRD2 SLC18B1 SLC25A21 STK17B TCTEX1D2 TM7SF2 UBXN8"
2083 "GDPD1 SLC7A2"
2084 "IMMP1L KLHL2 SC5D TMEM248 TSPAN5 ZDHHC21 ZDHHC6"
2085 "ALG8 NAT8L PDZD4 SNX25 TVP23C WDR41"
2086 "ATP2B3 SEZ6L2"
2087 "CYP2S1 TMEM245"
2088 "TRAPPC3 USP24"
2089 "GALNT10 GDPD5 LYPD3 PHTF1 PHTF2 REEP1 SLC41A1"
2090 "B9D2 LAPTM4B"
2091 "RFX5 RFXAP"
2092 "RD3 RNF32"
2093 "RAB40A RAB40AL RAB40B"
2094 "AKTIP FAM160A1 FAM160A2 HOOK3"
2095 "DPH6 FLT1 KDM5D"
2096 "ANP32A GLDC"
2097 "C11orf74 FBXO44 IFT122 IFT140 IFT43 RFNG SPSB3 WDR19"
2098 "WNT4 WNT7B"
2099 "COQ5 FOXRED1 GPD1L GTPBP3"
2100 "AASS BCKDK GATB L2HGDH"
2101 "APOOL FAM210A"
2102 "COX11 NUBPL"
2103 "C19orf70 COQ7"
2104 "C5orf34 THBS1 THBS3"
2105 "FANCB FANCL"
2106 "PDE7A UBXN11"
2107 "COLEC11 NELL2"
2108 "BIRC5 CDCA8"
2109 "DUSP8 KCNAB3 MAPK8 MAPK9 WDR62"
2110 "ANKS1A DEF6 PRKCQ"
2111 "UCK1 UCK2 UPRT"
2112 "SYT10 SYT3 SYT6"
2113 "DNAAF3 MON1A SP6"
2114 "AKR1A1 ANXA5 CBR1 DSTN IDH1 TKT"
2115 "CNDP2 PGLS"
2116 "BLVRB DUSP3"
2117 "ADH5 ASS1"
2118 "CASZ1 SEMA4D SUMO4 TTC39C XYLB"
2119 "MRI1 RPE USP14"
2120 "ITPRIP MTHFR ORMDL2 RASSF1"
2121 "RASSF2 SAV1 STK3 STK4"
2122 "GPC4 GPX8"
2123 "FAM174A PEX16 PLD6"
2124 "CHST7 GLT8D2"
2125 "GINS1 GINS2"
2126 "CCDC84 TUT1 TXNL4B"
2127 "CCDC34 RABL2A"
2128 "KLK6 LRAT"
2129 "MORC1 NR1H3 TFDP3 TP73"
2130 "CST9 PCP2 TMEM38A"
2131 "BTG3 GPBP1L1 TOB1 TOB2"
2132 "AAMP ACE2 AEN DNAJC21 GRK6"
2133 "AAMP ACE2 AEN DNAJC21 GRK6 PRKD3"
2134 "SHC4 THEM4"
2135 "BOLA3 NUDT6"
2136 "COL8A2 P4HA2"
2137 "C1QTNF2 EGLN2"
2138 "CKMT2 COL2A1"
2139 "DAZAP2 FNDC3B PLEKHB1 RBFOX2 RBPMS"
2140 "EAF2 ELL3"
2141 "EFCAB7 IQCE RFFL RNF34"
2142 "CDK14 FGR"
2143 "ATG5 C16orf70 MASTL"
2144 "RAB11A RAB11FIP1"
2145 "C16orf91 COX20"
2146 "B9D1 DEPDC1B IFI30"
2147 "C11orf54 NHLRC2 SUOX"
2148 "PMVK STAMBP"
2149 "ARL3 MPI"
2150 "GABARAPL2 GLRX3 HPCAL1 PITHD1"
2151 "SNX1 SNX2 SNX5 SNX6 TSN VPS26A VPS26B VPS29 VPS35"
2152 "PRPSAP2 TARS"
2153 "CPOX ETF1 FKBP3 MCTS1 NMT1"
2154 "DDI2 EIF4A2"
2155 "DCAF8 DYRK1A FNTA FNTB GRIP1"
2156 "ABCA2 ARSK GXYLT1 PDSS1 PON2 PTP4A2 RNF167 RNF170 TDRKH"
2157 "PIGN TXNDC15"
2158 "FAM160B2 SMG8 SMG9"
2159 "ANGEL1 DEPDC5 NPRL2 ZNF414"
2160 "CSTA DSP OCRL"
2161 "ASAP1 ASAP2 CASKIN2 CBL GIT2 MINK1 NCK1 NCK2 WASL WIPF1"
2162 "ARHGEF6 ASAP1 CASKIN2 CBL GIT2 MINK1 NCK2 WASL"
2163 "PLA2G7 PTPRN"
2164 "GPD1L LTA4H OXSR1 PEF1 RNPEP"
2165 "NANS PREP"
2166 "IMMP1L KLHL2 RDH12 TMEM248 TSPAN5 ZDHHC21"
2167 "NAT8L PDZD4 SNX25 WDR41"
2168 "CYHR1 SETD7"
2169 "ATP13A1 CDK5RAP3"
2170 "CYP51A1 DHRS7 EPHX1 ERGIC1 PREB TEX264"
2171 "GPT2 MDP1 PTPN18"
2172 "EPHA6 GPHA2 PCSK5"
2173 "CAPN15 HERPUD1"
2174 "TMCO6 ZNF511"
2175 "CDYL2 MIER2 MIER3 REST USP45"
2176 "GPR183 NRXN3"
2177 "FGF2 TMEFF1"
2178 "ARSB GALNS HSPA13 TOR1B"
2179 "ARSA BCHE DNAJC3 EDEM3 ERLEC1 GRN KDELC1 MAN2B1 MANBA MGAT1 NHLRC3 OS9 PAM POGLUT1 SDF2 SEL1L SGSH SIAE TXNDC16 UGGT2"
2180 "GLB1 MAN2B2"
2181 "C12orf66 ITFG2 KPTN SZT2 TMCO4 USP12"
2182 "MEOX1 MEOX2"
2183 "IGSF9B OPCML RANBP3L RXFP2"
2184 "COL14A1 COL18A1 COL4A2"
2185 "ATP6V1D ATP6V1F ATP6V1G2"
2186 "CHID1 CYBA"
2187 "FAM13C PDZRN3 PPP1R36 TAF7L"
2188 "FAF1 NRBP1"
2189 "ATG7 DPP9"
2190 "BLVRB DUSP3 SCRN1 STAMBP"
2191 "BPNT1 NUDT5 SARS SIK2 SKA3"
2192 "SKA1 SKA2"
2193 "MROH1 SNX12"
2194 "PCIF1 TAX1BP3"
2195 "MLKL SRA1 TDRD7"
2196 "IL17A IL2"
2197 "CNTRL CRYM GOLGA1 PTGR2 TRIP10"
2198 "HEXA PNPLA8"
2199 "FAM160B2 KCNAB2 KIAA0100 RNF126"
2200 "OSBPL2 UHRF1BP1"
2201 "ARHGAP32 DNAJA4 SIRT5 UAP1"
2202 "PLXNB1 SGTB"
2203 "FNDC4 REEP3 TRIM14"
2204 "MTMR2 SBF2"
2205 "WNK1 WNK2"
2206 "APIP TSC22D2 TSC22D4 TTL"
2207 "PTMA SPATA5 TRMT112 YTHDF1"
2208 "LARP4 LARP4B"
2209 "TJP3 ZNF622"
2210 "ASXL1 CKAP2 SH2D2A"
2211 "C17orf49 HCFC1 PTBP2"
2212 "NFE2L1 NFE2L2"
2213 "CNPY3 LRPAP1 LRRC40"
2214 "AMOTL2 YAP1"
2215 "GIN1 GREB1L RIMS2"
2216 "CCDC40 SMOC2"
2217 "CDT1 GMNN"
2218 "FAM219B TRMU"
2219 "BCL9 FAM35A FNBP1L REV3L RNF135 STMN3 USP42"
2220 "ANKRD29 DHDDS FOXP4 TFCP2 UBP1 UHRF2"
2221 "GON4L MLXIP STK17B"
2222 "LEF1 PRMT6"
2223 "FAM98A HIST1H2BD IARS2 SAP18"
2224 "DBF4B PYROXD1"
2225 "ETNK1 PAPOLG"
2226 "BMPR1B EVA1C"
2227 "FAM206A PUS10"
2228 "RYR1 TLE1 ZFAND6"
2229 "DNASE1L2 TBX20"
2230 "MIEF1 RIC3 TAPT1"
2231 "CROT PNMA6A WDFY2"
2232 "GMCL1 SUCO"
2233 "PHLDA2 SNCG"
2234 "MZT1 MZT2A MZT2B NEDD1 NME7 TUBG1 TUBGCP2 TUBGCP3 TUBGCP4 TUBGCP5 TUBGCP6"
2235 "FGD6 NFIC"
2236 "DUSP28 PIFO"
2237 "ANKRD52 DCLRE1C TRIM26"
2238 "APOOL COX7A2 FAM210A"
2239 "APAF1 ENDOV"
2240 "LZTS1 LZTS2 SESTD1 TRAF5 TTLL4"
2241 "MECOM PRDM16 SPDEF"
2242 "C5orf30 GNAT2 KRT6B UNC119B"
2243 "UBXN11 UNC119"
2244 "HSPB8 SIPA1L2"
2245 "ARSB CTSA GLB1 MAN2B2"
2246 "HSDL1 PRAF2"
2247 "MTFR1L PPOX SLC25A20"
2248 "MMP2 TTC29"
2249 "TNKS TNKS2"
2250 "ABL2 PYGO2"
2251 "C16orf91 COX20 MSMO1 NT5DC3 UQCC1"
2252 "FAM89A FRMD6 KCTD17 KCTD5 POLK PTPN4 THAP9"
2253 "CTC1 LDLRAP1 TEN1"
2254 "LRRIQ3 R3HCC1L"
2255 "AZI2 CASP2 KCTD3 PJA2 SHKBP1"
2256 "DCAF4L2 LDLR PYGL"
2257 "DMTN TRAPPC10 TRAPPC9"
2258 "BCL2L14 C7orf43 CABS1"
2259 "IRF2BP1 VGLL4"
2260 "TEAD1 TEAD2 TEAD3 TEAD4 WWTR1"
2261 "IRF2BP2 IRF2BPL SPEG"
2262 "C8orf82 FNBP1 MECR MTRF1 ZNF557"
2263 "HEMK1 MTRF1L"
2264 "B4GALT4 MAN1B1 ST3GAL4"
2265 "LIG1 POLA1 POLE RFC1"
2266 "CHTF18 CHTF8 DSCC1 RFC2 RFC3 RFC4 RFC5"
2267 "ERCC6L ESPL1 POLD1 POLD2 POLD4 TTF2"
2268 "APEX2 PCNA POLD3 POLE3 POLE4 SLBP TOP2B"
2269 "DAPK1 GSPT1 HSCB METAP1D PAN2 RNF135 TTC31"
2270 "EIF2AK2 GABARAPL2 LSS OCIAD1 RDH14"
2271 "HPCAL1 LYPLA1"
2272 "IER2 ZBTB40"
2273 "GUF1 L2HGDH"
2274 "ERLEC1 GCDH"
2275 "GATB NUBPL"
2276 "ACADM ACTN2 MYH7B PKIG TPM3"
2277 "ATP6V1F ATP6V1G2"
2278 "MAP3K15 MAP3K5 TNFSF13B"
2279 "POC5 SFI1"
2280 "FZD3 KLC3 SYNE4"
2281 "PGLS PHPT1"
2282 "NUTF2 TMSB4X"
2283 "SSR4 TAP1"
2284 "CYP2C18 MYLK2 TMEM260"
2285 "ACVR2A ADIPOR1 FAM171A2 LRP10 NDFIP1 NDFIP2 OSMR TGFBR2"
2286 "DCTPP1 UGCG"
2287 "IFNGR1 RNF149 SLC20A1 TMEM59 TNFRSF10B"
2288 "ACVR1 ACVRL1"
2289 "B9D2 TMEM231"
2290 "CASC4 EFCAB14 GRAMD1B GRAMD1C GRAMD3 MARCH5"
2291 "ADAM17 PTK7 SCARB1"
2292 "NRP1 PLXNA1 PLXNA3"
2293 "CD96 FRAS1"
2294 "ADAM15 CHPF ITGAV PTPRU TGFB1"
2295 "MGRN1 PTPRK"
2296 "NOMO1 PVR"
2297 "ATP1B2 METTL7A TBL2 TMEM63A"
2298 "LCLAT1 PNPLA6"
2299 "NYNRIN TNFAIP8L2"
2300 "BAG4 MSRB2 MT2A PRELID1 TRIAP1"
2301 "C15orf57 EID3 UROC1"
2302 "TATDN1 TLK1 TLK2"
2303 "BBS5 TTC8"
2304 "BHMT2 CARM1 KIAA1191 MAGED1 POU2AF1"
2305 "ERI3 PDPK1"
2306 "SLC25A13 SLC25A22"
2307 "FLG2 KRT6A MOK"
2308 "B3GALNT1 LOR PLEKHD1"
2309 "GNRHR HRNR"
2310 "RHOBTB1 SLC28A3"
2311 "NECAP1 NUMBL"
2312 "AASDHPPT CARHSP1 NECAP2"
2313 "CCDC57 FAM221A"
2314 "KRT6A RHOBTB1 SLC28A3"
2315 "ACSL1 L2HGDH"
2316 "IDH3B IDH3G RDH13"
2317 "SEC62 SEC63"
2318 "ABCC1 FAM162A GHDC RER1 SLC25A46 TM9SF3"
2319 "VPS11 VPS39"
2320 "COPZ1 DNAJB4 NEO1 UBXN6"
2321 "SORBS1 STARD13"
2322 "GSTM2 GSTM4"
2323 "ARFGAP1 ARFGAP3"
2324 "C6orf203 HMGN3 LGMN NAA35 PPIP5K2 SSU72 TRIO"
2325 "USP20 WDR20"
2326 "PHLPP2 RAD51AP1 USP46 WDR48"
2327 "DAPK1 RNF135"
2328 "CBR4 WFS1"
2329 "KANK2 PTER"
2330 "ENTPD5 FBXO6"
2331 "ARHGEF37 BIN3"
2332 "UBE2Q1 UHRF1BP1"
2333 "CNTRL PCBD2 PTGR2 RABL6"
2334 "BST2 UAP1"
2335 "HEXA PFKFB4 PLXNB1 PNPLA8 SGTB"
2336 "ARHGAP32 DNAJA4 GOLGA3 OSBPL2 SIRT5"
2337 "DDX20 GEMIN7"
2338 "ANKRD50 DUS4L"
2339 "ASF1B KIAA1524 TELO2 TTI1"
2340 "KIAA0368 MTOR RICTOR"
2341 "SMS UCHL3 VPS29"
2342 "CC2D1A DIP2B HBS1L TTLL12 UBA5"
2343 "DDX10 DHX37 DNTTIP2 PDCD11 UTP14A"
2344 "FANCI HEATR1 INTS1 INTS3 LTN1 MDN1"
2345 "ATR KIN"
2346 "INTS4 INTS5 INTS6"
2347 "C1orf131 INTS10 INTS12 INTS9"
2348 "INTS1 INTS3"
2349 "FANCI HEATR1 LTN1"
2350 "CLDN10 EGFLAM FGF1"
2351 "CRYL1 TIMM10 TIMM9"
2352 "ATPIF1 DHRS4 TIMM8A"
2353 "C11orf54 MPI PCTP SUOX"
2354 "AACS C12orf57 C9orf64 LACTB2 NT5DC1 PDXP PMM2 POLL UBE2D3"
2355 "PGBD5 PTAR1 RABGGTB"
2356 "CHM CHML RAB9B RABGGTA"
2357 "RPS6KA4 WDR45B"
2358 "RAB22A RAB31"
2359 "METTL9 SNX11 SPN"
2360 "CCNDBP1 CERK TAF13 TBC1D22A"
2361 "ANKRD13C SLC19A2 TCAF2"
2362 "CABLES2 DNAH14 LAPTM4A ZNF627 ZNF696"
2363 "AATF DDX10 MPHOSPH10 NOL10 PDCD11 RPP40 UTP3 WDR43"
2364 "IMP3 IMP4 MAK16"
2365 "ARHGEF6 RAPH1"
2366 "SNX16 WDR60"
2367 "FOXRED2 SMPD1"
2368 "CRY2 DOT1L FEZ2 MLLT10 MLLT3 SCAI"
2369 "CYTH1 CYTH2 CYTIP UBA5"
2370 "CCDC115 RNF185 TMEM199"
2371 "GOLT1B NCKAP5L PTEN PTGES"
2372 "FRMD5 NBAS SCFD2 STX18 USE1"
2373 "BNIP1 ZW10"
2374 "GOSR2 STX17 STX5 VTI1B"
2375 "STX10 STX3 STXBP5 TBC1D17"
2376 "BET1 GOSR1 STX16 STX6 STX8 TMA7 VAMP4 VTI1A"
2377 "SNAP23 STX12 STX4 VAMP3 VAMP8"
2378 "SYNGR1 TMEM11"
2379 "EGR2 SNAI1"
2380 "CFLAR FCAR NDFIP2 PDXDC1 SUSD6"
2381 "CASP8 DDR1"
2382 "FLVCR1 NDFIP1 RNF149 TMEM59 TNFRSF10B"
2383 "GALNS MAN2B1"
2384 "GUSB MANBA NAGLU PRCP SCPEP1 SIAE"
2385 "GRN SGSH SIL1"
2386 "ACTR3B FBXO46 LRFN4 PTTG1 TDP1 USP20 WDR20"
2387 "TBC1D14 TFE3 TFEB"
2388 "BICD1 C15orf40 DCUN1D5 DUS1L ORC6"
2389 "HYI SCLY"
2390 "PPEF1 YJEFN3"
2391 "CLOCK PICK1 PPP1R13B"
2392 "CIPC FNIP1"
2393 "KCNK1 TRAPPC13"
2394 "CCDC85C SRGAP3"
2395 "BNC2 DCST2 KIF19"
2396 "GAL3ST1 PIGW PSG4"
2397 "CHCHD2 CHST8"
2398 "ACOT8 ARL1"
2399 "METTL16 PUS1"
2400 "GALNT7 RSPRY1 WDR43 WDR75"
2401 "BST2 SLC25A24 SLC25A4"
2402 "GALNS GPNMB"
2403 "NHLRC3 UBE2J1"
2404 "ARSB MAN2B1"
2405 "FNDC4 PALMD REEP3 TRADD"
2406 "DNAJA4 SIRT5"
2407 "SLC36A1 TRPM4"
2408 "SREK1IP1 TUB"
2409 "LRR1 ZBTB38"
2410 "EEF1A2 OSTM1 YIPF1"
2411 "CLCN7 GLB1 SLC35E1"
2412 "PLEKHA7 SHC4"
2413 "CBFA2T3 CORO7-PAM16 DNTT IRF2 PIAS2 TLE3"
2414 "ALDH1L2 COL11A2 CYP4X1 H1FOO IL12RB1 NXPH3 PRKG1 ST8SIA1 TEX15"
2415 "ASB1 CASQ2 TSNARE1"
2416 "FERMT2 MAPK3 PITHD1"
2417 "DENND6B OR5F1"
2418 "ARPIN HMGN5 MEF2D RANBP3 RWDD2B TAS2R41"
2419 "ATP6V0D2 C1orf21 TMEM185A TMEM185B"
2420 "ADAM17 QSOX2"
2421 "DSC2 LDLR"
2422 "HSPA13 ITFG1 TOR1B"
2423 "PTK7 PVR"
2424 "ATF6 DNAJC30 ERGIC2 FAM76B"
2425 "CELSR1 CELSR2"
2426 "RRAGA RRAGC RRAGD"
2427 "ARNT HIF1A TCEANC2"
2428 "EPN1 EPN2 EPN3 SMURF1"
2429 "MID2 SYT17"
2430 "EPN3 MID2 SMURF1 SYT17"
2431 "ARL17B C8orf74 FGFR2 MAP1LC3B2"
2432 "EFNB2 EPHA5 SDC3"
2433 "ALOX12B BOLL CDC20B CIDEA EHF GRIP1 GSG1 IL37"
2434 "SEMA3D ZFPM2"
2435 "BPIFA2 CRNN CST2 GNB3 KIR2DS2 KIR3DL1 MUC7 RCAN2 SPRR3 UCP2 ZG16B"
2436 "B3GALNT1 CST1 CST4"
2437 "ALOX12B CAPNS2 CIDEA CPA4 DPPA4 FLG2 GLIPR1 GSDMA HAL IL36G KIR3DS1 KLK7 LOR NCCRP1 PLCZ1 PLK2 RNASE7 SDR9C7 SERPINA12 SERPINB7 TGM1 TGM3"
2438 "ALOXE3 C20orf96 VEGFA VEGFB"
2439 "ASPRV1 ELMOD3 FLG KLK5 TGM5"
2440 "KRT23 SYNC"
2441 "CLK4 PACRGL TBX20"
2442 "HIPK2 RAVER2 RYR1 SATB1 TLE1 TLE4 TRAF3IP2 ZFAND6"
2443 "DNAJC28 KRT222 SLC19A2"
2444 "C1GALT1 CD27 CD70"
2445 "RBFA SLC25A51"
2446 "CTNND1 EPB41L3"
2447 "IL36G TREX2 ZBED9 ZNF215 ZNF396 ZSCAN20 ZSCAN23"
2448 "MZF1 ZSCAN1"
2449 "CCDC121 MAGEB18 PRDM16 PRMT8 SPDEF SUCNR1 TIGD7"
2450 "ARL6IP1 FGD5 METTL7B"
2451 "ALG9 C10orf35 LRRC8C SETD7 SLC41A3"
2452 "AMFR BRI3BP"
2453 "SELENBP1 SERINC1"
2454 "GM2A POF1B"
2455 "CRABP2 ICAM1 PLBD1 S100A14 S100A16"
2456 "PKP3 PPL SERPINB2 SERPINB5"
2457 "IDH1 SELENBP1 SERINC1"
2458 "AKR1A1 ANXA5 CNDP2 PGLS"
2459 "ADH5 ASS1 PEBP1"
2460 "CRYAB LGALS3"
2461 "ABCC8 ABCC9 CCDC175 FGF13"
2462 "FAM160B1 PNKD"
2463 "GEMIN2 GEMIN6 GEMIN8"
2464 "RFX1 RFX2"
2465 "C2orf76 EVI5L MAP4K4"
2466 "CSNK1G3 SRI"
2467 "CD244 MTG1 USP3"
2468 "CDC6 LMLN POMT2 SLC10A7 TMEM39B ZRANB3"
2469 "C1orf43 CHRNA9 DNAJC18 HS6ST1 PPP1R15B ZIC2"
2470 "DNAJC30 FAM76B"
2471 "SLC6A8 SLITRK5"
2472 "MTG1 SLC10A7 USP3 ZRANB3"
2473 "FAM184A FLAD1 PLEKHO2"
2474 "RAP1GAP TMEM222"
2475 "GPSM1 SAPCD2"
2476 "GNG10 GNG11 GNG4 RGS12 RGS14 RIC8A"
2477 "MT-ATP6 SERINC1"
2478 "C1orf21 TMEM185A TMEM185B"
2479 "CSNK1G1 EEPD1 IL2RG REEP6"
2480 "ALDH6A1 DHRS4 HIBCH"
2481 "ETV6 ZNF609"
2482 "KIF22 ZNF668"
2483 "KIF21B SMG6 TRMT13 USF1 USF2"
2484 "ADAMTS12 SNRK"
2485 "C1orf131 INTS10 INTS12 INTS4 INTS5 INTS6 INTS9"
2486 "ARL17B EFNB2 EPHA5 SDC3"
2487 "DUT LDHC RAC1"
2488 "CBWD5 FOXF2 ITGA7 NDST2 SERPINB11 STC2"
2489 "CSGALNACT1 CSGALNACT2"
2490 "GCNT1 PTCH1 SEMA6A ST8SIA4"
2491 "IDS MANEAL ST3GAL4 SUMF1"
2492 "CCNJL FOXF1"
2493 "GOT2 HIBADH PPIF"
2494 "RBM42 RSRC1 SCAF11 SNRNP27"
2495 "FAM98A HSD17B10 TRMT10C"
2496 "BPGM PITPNA"
2497 "DUS3L GGPS1 PM20D2 PUS7 RNGTT SMG9"
2498 "COQ7 SETD3"
2499 "DIAPH3 SLC25A44 SMCR8 ZWILCH"
2500 "DENND5A PPP1R14B"
2501 "IL16 MIS18BP1 NAF1 PHF1 SHQ1"
2502 "PPP1R11 PPP1R7 ULK1 ZFYVE16"
2503 "KCTD15 PYROXD2"
2504 "DNPEP KBTBD6 PLCD1 TNXB"
2505 "YY1AP1 ZNF524"
2506 "ADAM15 EXT2"
2507 "HECW1 SMAD2 STXBP4 WWC2"
2508 "SMURF2 USP35"
2509 "NFATC3 RNF138 SUFU"
2510 "MAGI3 RHBDL1 TCL1B"
2511 "NPL TRIM7"
2512 "LDOC1 PEG10"
2513 "AFMID TOMM40L"
2514 "ANKRD29 TFCP2 UBP1"
2515 "ACTG1 HSP90B1 P4HB PDIA4"
2516 "PGBD5 RABGGTB"
2517 "FBXL20 PIP5K1C PXN RMDN2 TRMT2B"
2518 "RAB40B RAB40C"
2519 "BBS5 TTC8 UROC1"
2520 "HVCN1 LZTFL1"
2521 "DCX RGL4"
2522 "CADM2 CALB2 CAMK2A DCLK1 DPP6 DPYSL4 DPYSL5 ELAVL4 GNG3 GPM6A GPM6B GRIA2 HPCA HPCAL4 MAP1LC3B2 NDRG4 NTM PHYHIPL SLC12A5 SNCA SNCB SYP SYT1 VSNL1"
2523 "ACMSD CDK20"
2524 "EPHB4 FAM213A FCGRT HLA-E MFGE8"
2525 "ABHD14A GPR50 HLA-G"
2526 "COASY RASAL1 TRIO"
2527 "BST2 FDX1"
2528 "MYPN NUMBL"
2529 "BRAT1 DYM"
2530 "ARL2BP DNASE2 MLXIP PNKD"
2531 "FAM160B1 GOLPH3L TSC2"
2532 "ARL14EP SETDB1"
2533 "IGF1R INSR ITGAV MAN2A2 PLTP TGFB1"
2534 "ITGA5 ITGB3"
2535 "ITGA2 ITGB1"
2536 "BRD1 PHIP RSF1 ZNF280C"
2537 "ATRX CBX1 CHD1 DAXX ORC1 RPS19BP1 TFDP1"
2538 "ING4 JADE1 JADE2 JADE3 KAT7"
2539 "CENPV CHAMP1 ESF1 IWS1 NIPBL POGZ"
2540 "BAZ1B KMT2A RAI1 SDC2 SMCHD1"
2541 "ADNP2 CBX2 INCENP LAS1L PHC2 RBBP5 SENP3 VRK3"
2542 "ADH1B ADH1C"
2543 "ARSG P3H3"
2544 "C7orf43 HIF1A KIRREL2 VHL ZNF518A"
2545 "APH1A SLC43A1"
2546 "NRG1 SLC25A21 SLC25A23 SLC25A25 SLC25A29 TMEM165 TMTC4"
2547 "C1orf43 CHRNA9 DNAJC18 DNAJC30 ZIC2"
2548 "HS6ST1 RHOBTB3 TMEM39B"
2549 "SCD5 SLC16A10"
2550 "MAB21L1 MEIS1 MEIS2 MEIS3 PBX1 PBX3 PBX4 PIGL"
2551 "PBX2 PKNOX1"
2552 "CCDC170 MAB21L2"
2553 "KIF21B PARN SMG6 TRMT13 USF1 USF2"
2554 "PARN SMG6 TRMT13 USF1 USF2"
2555 "AUNIP ITPKC"
2556 "AURKA C2orf49 CEP192 MTMR4 OSBPL6 TPX2"
2557 "AMER1 APC AXIN1 RMND5B"
2558 "ARL3 CAB39 CSTB PSAT1"
2559 "ACP1 DPP3"
2560 "CAB39L STRADA"
2561 "FAH MTPN UROD"
2562 "CACNG4 DPY19L3 GLT8D2"
2563 "ATP9A RMND1"
2564 "PLEKHA7 TSPAN33"
2565 "COX15 HIGD1A ICMT MTFP1 ROMO1 SFXN4"
2566 "ARRDC1 NXN PBK"
2567 "BCAS3 WDR53"
2568 "ARRDC1 NXN"
2569 "BCAR1 CASP7 SAMD9 SHOC2 UBE2A UBE2L3 VIPAS39"
2570 "PTPRF SEC62 SLC12A2 SYNJ2BP TM9SF3 TM9SF4 TMED7"
2571 "DAGLA GABRB3 KCNQ5 MCOLN2 MCOLN3"
2572 "CLEC4D KCNT1"
2573 "METTL15 PKMYT1"
2574 "CDK5RAP1 EXD2 GCDH KIAA0391 PARL PISD PTPMT1"
2575 "EGLN2 KIRREL2 VHL"
2576 "C7orf43 CABS1"
2577 "CPNE8 EDIL3 EFHD1 NEDD4L"
2578 "CSNK1G1 NCS1"
2579 "LACTB2 PGM2L1"
2580 "ADSSL1 UBA5 UFM1"
2581 "AKR1D1 PTPN9"
2582 "AKR1C1 AKR1C2 AKR1C3"
2583 "HYI PLEKHF2 SCLY"
2584 "EIF4E2 HDAC3 KIF11 NCOR1"
2585 "ADCY3 ADCY9 SLC12A4 SLC31A1"
2586 "DGAT1 FITM2 YIPF4"
2587 "OSTM1 RNF167"
2588 "SLC12A6 SLC38A9"
2589 "TMEM179B WFS1"
2590 "CXorf21 SLC15A4"
2591 "SLC17A5 SLC26A2"
2592 "KDELR3 SLC7A3"
2593 "LPAR6 MFSD5 TMEM164"
2594 "DOLK GALNT8 GPR50"
2595 "EGR1 MAGEB2"
2596 "RNF26 ZNF143"
2597 "GSTM5 PAK6"
2598 "BTBD10 KCTD20 KLHL18 KLHL24 KLHL42 KLHL8 YDJC"
2599 "ATP11A NPDC1"
2600 "OGFOD1 RWDD1"
2601 "PGGT1B ZPR1"
2602 "SLAIN2 TACC2 TACC3"
2603 "C9orf24 MBOAT1 NR3C1"
2604 "CREBZF MMADHC"
2605 "AMMECR1L C16orf59 TUBD1 TUBE1"
2606 "BBS5 LZTFL1"
2607 "HVCN1 MTG2 OXLD1"
2608 "ALAS1 DUSP19"
2609 "FAM120C HELZ MAP3K7 TAB2"
2610 "NOB1 PDCD2L"
2611 "ANKRD17 ATXN2 PUM1 YTHDF1"
2612 "TEP1 TIRAP"
2613 "INSRR TIAM2"
2614 "ADAT2 ASPSCR1 FAM104A UBXN2B"
2615 "AMOT AMOTL1"
2616 "GPS2 NCOR2 TBL1X"
2617 "KIF11 NCOR1"
2618 "ELOVL1 TIMM50"
2619 "SMUG1 USP25"
2620 "BRDT CROT KLHDC4"
2621 "ZNF19 ZNF316"
2622 "RBAK TOR2A USP34 ZNF689 ZNF707 ZNF92"
2623 "TRIM39 ZNF419 ZNF621"
2624 "FAM172A FBXO38 PCDH15"
2625 "CNNM3 DPY19L4 GPAA1 SCAP SNX14 TMEM259"
2626 "KIAA2013 LRRC1"
2627 "SLC35F6 TMEM106B"
2628 "GAS2 WRN XRCC5"
2629 "ASAP3 MIB2 NCOA3 SMYD5"
2630 "MAP3K6 PLEKHO2"
2631 "CDCA3 CTDSP1 CTDSP2 CTDSPL"
2632 "BCKDK METTL21C"
2633 "ATP4A HSD17B7"
2634 "SLAMF1 SLC1A1"
2635 "GK2 RAB39B TAMM41"
2636 "H2AFY HIST1H2BK"
2637 "ACY1 GSTP1 RAB8B TLN1 UGP2"
2638 "SAMD9L SPAG1 USP35"
2639 "CLEC4A GBP7 TEX11 TSSK2 UGT3A2"
2640 "ARHGAP8 HTR3C"
2641 "KCNH1 PDZRN4"
2642 "ANKRD17 FBXL18 MAGEA1 MAGEB3"
2643 "HOXB5 HOXC4"
2644 "FAM9A NAP1L3"
2645 "ANKHD1 SFRP4"
2646 "RNGTT WDHD1"
2647 "BOD1L1 OGT SETD1A WDR5"
2648 "FANCG KANSL1 KANSL3 KAT8 MSL1 MSL3 R3HDM1"
2649 "CXXC1 KIAA0355"
2650 "CASP8 DDR1 FLVCR1 NDFIP1 RNF149 TMEM59 TNFRSF10B"
2651 "ADCY3 CXorf21 SLC15A4"
2652 "DOCK1 DOCK3 DOCK5 ELMO1 ELMO2 USP4"
2653 "C20orf27 MID1 PPP1R3D"
2654 "PIK3AP1 SYNJ1"
2655 "FAM83A FAM83B FAM83H USO1 WIPF2"
2656 "CEP170B ORMDL1"
2657 "RAB18 SFXN1 UFL1"
2658 "FAM209A UBASH3B"
2659 "DOC2A KCTD21 TTC21B"
2660 "GMPR GMPR2"
2661 "ABHD11 SMAP2"
2662 "ASAP1 ENSA TBCC"
2663 "GINM1 HS6ST2 MBTPS1"
2664 "HECTD1 NAT1"
2665 "CHTF18 DSCC1 LIG1 NEDD4 PTPN14 RFC1 SLC35G2 UBA1"
2666 "CHTF8 ESPL1 RFC2 RFC3 RFC4 RFC5 TRIP13"
2667 "RFT1 TMTC3"
2668 "FAM189A2 KCNG1"
2669 "C8orf37 GLMP HEG1 KIAA1549 PIK3C2G SLC17A5 SLC22A23 SLC9A6"
2670 "CLCN3 LGALS8 SLC12A7"
2671 "LGALS9 LGALS9B PBK"
2672 "CLCN5 LGALS9C RRAGB SEZ6L2 SLC12A6"
2673 "AKR1B10 GGCX OSTC TOMM20"
2674 "AKR1C2 AKR1D1 SOD2 UFM1"
2675 "APBB2 ATP7A SYDE2 WDR41"
2676 "ASH1L ASH2L CHN1 KMT2B MEN1 NCOA6 PRICKLE2 UBN1 ZNF354B ZNF646"
2677 "MPPED2 NR2F6"
2678 "NXF1 UPF1"
2679 "FCRLA RCBTB2 ZNF558"
2680 "FLG2 KRT6A"
2681 "ALB PLK2"
2682 "GOLPH3 LAMB3 WDFY1"
2683 "C5orf30 MECOM PRDM16 SPDEF"
2684 "KRT6B LZTS1 SESTD1 UNC119B"
2685 "MAGEB18 PRMT8 TIGD7"
2686 "GAB2 GRAP2 IFNAR2"
2687 "DTNA SNAP29 SPZ1 TRIM9"
2688 "STX19 STXBP5L"
2689 "ANXA11 ANXA7 PYGB"
2690 "ANXA4 GALM GAMT"
2691 "FKBP1B FUT10 KCNH6"
2692 "CBFB GSTCD TAS2R41"
2693 "DDI1 NR2E3 NRIP3 RSC1A1 USP47"
2694 "ADD2 ANKRD29 HMGN1 POC5 PRMT6 SFI1 TFCP2 UBP1"
2695 "MCM3AP XPC"
2696 "CDON CEACAM21 GAL PCDHGA11 PCDHGC3 SDK2"
2697 "ARNT HIF1A TCEANC2 ZNF518A"
2698 "C7orf43 KIRREL2 VHL"
2699 "GPNMB KIAA0319L NPC1 SLC38A2 SPPL2A"
2700 "CD276 CD58"
2701 "DCBLD1 EFNB3 ERBB3 FGFRL1 FUT4 GAL HLA-DPA1 HS3ST3A1 KLRG2 NMU"
2702 "CCDC8 NXPH2 PCDH9 VSIG4"
2703 "HFE2 MALRD1"
2704 "EFNB3 ERBB3 GAL HLA-DPA1 HS3ST3A1"
2705 "IL20RB NMU"
2706 "KLRG2 TEX29"
2707 "GSTA5 NOD2"
2708 "CCDC148 CD207 KCNIP1 KCNIP2 KCNIP4 PRR4 S100A7A SCGB1D1 SUSD3"
2709 "ELOVL5 IRF2BP2 ZNF217"
2710 "CTBP2 STIP1"
2711 "ARID5B KIF22 TFAP4"
2712 "GFPT1 MT-ND1"
2713 "ANKRD13A ATP1A3 NLRX1 SLC1A4"
2714 "HMOX2 MARCH5"
2715 "CLPTM1 EPHX1 POR SEC63"
2716 "ASPH PGRMC2"
2717 "TM9SF2 TMED1 TMED10 TMED2 TMED3 TMED4 TMED9"
2718 "ALDH4A1 DNAJC5 ETHE1 FH LAP3 LYPLA1 NUDT9 UGP2"
2719 "PPP2R3A SFRP4 TMTC2"
2720 "DNASE2B LRP1B RSPO1"
2721 "LRP1B RSPO1 SFRP4"
2722 "CACNB3 CIAPIN1 NDOR1"
2723 "ANKRD16 KLHL7 NR2C2 SPRED2"
2724 "AS3MT FAM184A REV1"
2725 "CALCB GINM1 INHBA ITGB8 RCHY1 SMOC1 TPST1"
2726 "B4GALT3 C5orf15 NCR3LG1 ULBP3 XYLT2"
2727 "YY1AP1 ZNF430 ZNF524"
2728 "CLK2 PABPC4L RBM23"
2729 "FAM9A MAGEB6 NAP1L3"
2730 "DRG2 NT5C2 SBDS UBA6"
2731 "NARS TXNDC12"
2732 "NT5C2 UBA6"
2733 "DRG2 SBDS"
2734 "AARS TARS TBCB"
2735 "MAPK8IP3 MTMR6 MTMR9"
2736 "MBOAT1 NR3C1"
2737 "ATP5S EPB41L4B LYST"
2738 "BAX BBC3 BCL2L1 EDNRA"
2739 "BCL2 BCL2L11 RHPN2"
2740 "BTRC CDC25B SMARCAL1"
2741 "ANKRD29 BACH2 DHDDS FOXP4 TFCP2 UBP1 UHRF2"
2742 "ADSSL1 C12orf10 EIF2AK2"
2743 "ADA ADK NPEPPS"
2744 "GABARAPL2 RDH14"
2745 "UBA5 UFM1"
2746 "CHST4 DDX43 HES6 MYO7A WNT8A"
2747 "PLEKHG7 SH2D4B"
2748 "ACSBG2 LINGO4"
2749 "BCKDHB GCSH PPM1K"
2750 "GTF2E1 GTF2E2 SPOCK1"
2751 "NHSL1 SHB"
2752 "RNF220 ZC4H2"
2753 "CD58 CFLAR FAS RASD2 SLC4A7"
2754 "ARSB FUCA2 GALNS"
2755 "C1QL1 SLC41A3 ZACN"
2756 "APH1A HS6ST1 MFSD8 SLC43A1 SLC46A1 TMEM219"
2757 "COL2A1 COL8A2 P4HA2"
2758 "DIS3L2 FERMT1 MAD1L1 MAD2L1"
2759 "AMZ2 MAD2L1BP"
2760 "FRYL OARD1"
2761 "CLIC2 CLIC5"
2762 "C5orf30 SPDEF"
2763 "C1orf112 SLC38A7 TIMM17A UBIAD1"
2764 "MAGEB18 PRDM16 PRMT8 TIGD7"
2765 "HSD17B12 SLC25A3"
2766 "A4GALT ABHD14A BCL2L14"
2767 "A4GNT OTUD6A"
2768 "ASTL JMJD8 ST6GALNAC5"
2769 "TRUB1 ZCCHC11"
2770 "ARID3B BCAT1 FLYWCH2 RXRB TRIT1"
2771 "NAA38 TXLNG"
2772 "BCL2 BCL2L1 BCL2L11 BTRC RHPN2"
2773 "EDNRA GOLGA5 HS2ST1 SLC30A7"
2774 "CHRNA9 DNAJC18 HS6ST1 ZIC2"
2775 "FAM149B1 TBC1D32"
2776 "IFNAR2 SMR3A SNX18"
2777 "GAB2 GRAP2"
2778 "AUNIP TRIM68 VMAC"
2779 "RWDD2A YTHDF2"
2780 "GALNT1 PLXNB1"
2781 "DSCAM GABARAP"
2782 "SCARB1 SLC29A1 TMEM97"
2783 "KIAA2013 LRRC1 SLC7A1 ST3GAL6"
2784 "ILKAP LTN1"
2785 "UTP11 WEE1"
2786 "FOXM1 KIF18A"
2787 "BRPF3 FLYWCH1"
2788 "PTPN1 STIM1"
2789 "ALG5 NSDHL"
2790 "HIGD1A ICMT MTFP1 ROMO1 SFXN4 TIMMDC1 TMEM223 UQCC3 YME1L1"
2791 "COMTD1 EXOG GLCE HIGD2A LETMD1 MARC2 MOSPD2 MUL1 PDCD4 PEX19 PEX3 PXMP2 QPCTL SCO1"
2792 "AMACR SLC25A19 SPNS1"
2793 "IFT27 TBC1D13"
2794 "CASP8 DDR1 FAS"
2795 "FLVCR1 TNFRSF10B"
2796 "HBS1L MTERF2"
2797 "PPM1A PPM1B"
2798 "CXCR4 HIST1H2BN KCNK1 SLC39A7 VKORC1"
2799 "H2BFS H3F3C PNMA3"
2800 "C12orf66 TMCO4"
2801 "AURKC USP19"
2802 "IFNGR1 NDFIP1 NDFIP2 NEDD4 OSTC RNF149 SLC20A1 TGFBR2 TMEM59"
2803 "GLUL PRC1 TRAF3"
2804 "CCDC112 CCDC113 HDAC5 LTBR TCHP THAP3"
2805 "CCDC121 EDA2R TRAF1"
2806 "C9orf142 TERF2 TERF2IP"
2807 "DCLRE1B KANSL2 POT1"
2808 "ACD TERF1 TINF2"
2809 "HECTD2 RNF166 TNKS TNKS2"
2810 "APOBEC3D BRWD3 PIAS2 TET2"
2811 "DENND5A PPP1R14B SLC25A44"
2812 "DUS2 HID1 PRMT7 RNASEH1 RXRB ZWILCH"
2813 "DNAJB8 THAP2 TRIM71"
2814 "PARP16 VWA8"
2815 "LZTR1 NUDT12"
2816 "SPICE1 TRPC4AP"
2817 "HIVEP1 PUS7L TFAP4 ZMYM1"
2818 "ARNTL2 OLFM1 OLFM2 PCOLCE2"
2819 "BRIP1 CERS6 LRP5 LRP6 PIGB POMK TMBIM6 TMEM120B USP30 ZDHHC6"
2820 "ARV1 B4GALT5 C5orf15 CDON DCBLD1 DGAT1 DSC3 FGFRL1 FKRP FKTN FUT4 HLA-DPA1 IL27RA SEC61A2 SLC19A2 SLC47A1 TMEM39B TMEM59 TNFSF9 ULBP3"
2821 "CEACAM21 GAL PCDHGA11 PCDHGC3"
2822 "EVL MAP2K4"
2823 "CHMP7 GATB"
2824 "KLHL17 KLK8 MAK"
2825 "FGL1 PPP1R1A SPATS2L"
2826 "ASGR2 KLK2 PLAT"
2827 "SFXN3 SLC35E1"
2828 "HSPA14 NFAM1"
2829 "APOL2 ATP5E DERL2 GOLIM4 SLC35F6 SLC38A5 SLC39A7 TMEM63B VKORC1 YIPF4"
2830 "ALDH1B1 ALDH6A1 HSDL2 SCP2"
2831 "ALDH2 DNAJC5"
2832 "DHRS4 HIBCH PTRHD1"
2833 "CPT2 FAHD1 MUT"
2834 "PUS7L RAB11FIP5"
2835 "MICU1 MICU2"
2836 "DCP1A FBXO3 METTL13 ZYG11B"
2837 "BIRC6 TBC1D22A"
2838 "ABCC10 ERGIC2"
2839 "C1orf43 CHRNA9 DNAJC18 HS6ST1 ZIC2"
2840 "NRG1 RHOBTB3 TMEM39B"
2841 "COX15 ROMO1 SFXN4 SLC25A19 SPNS1 TIMMDC1 TMEM177 TMEM223 UQCC3 YME1L1"
2842 "EARS2 LARS2 METTL15 MTX3 RARS2 TBRG4 TFB2M"
2843 "AASS ACAD10 AGPAT5 C14orf2 C16orf58 DECR2 FOXRED1 GCAT LMBRD2 LPCAT4 LPGAT1 MT-CO1 NDUFA3 PARL PISD PPOX PTPMT1 SFXN2 SFXN5 SLC25A15 SLC25A40 SLC30A9 TMEM126B"
2844 "ABCB6 ABCB8 ACSL1 BCKDK BDH1 COQ5 FASTKD5 IDH3G L2HGDH MTX1 NUBPL PXMP2 RNF170 SLC25A46 SLC33A1 SPG7 TM7SF2"
2845 "AGPAT2 PTDSS2 TMEM87A"
2846 "APOOL FAM210A TMEM70"
2847 "ICMT MTFP1"
2848 "C19orf70 HIGD1A"
2849 "AMMECR1L CDK18 HOXB6 TTN"
2850 "MACF1 MAP1A"
2851 "DUSP16 DUSP7 DUSP9 HOXC9 MKNK2 RNF138"
2852 "ASPM CABIN1 EAF1 EAF2 ELL ELL3 ICE1 USPL1"
2853 "CCNT2 CDK9 HEXIM2"
2854 "AFF1 AFF4 ELL2 MLLT1 MLLT3 VEZF1"
2855 "CCNT1 HEXIM1 NSMAF"
2856 "CCDC82 TMEM168"
2857 "HELZ2 SLC38A7 XPO6"
2858 "C1GALT1 CD27 CD70 RBFA SLC25A51"
2859 "ALCAM PBK PIK3C2G"
2860 "LGALS9 LGALS9B LGALS9C"
2861 "AMMECR1 ARHGAP27"
2862 "CCDC28B HYKK OSGEP TMEM51"
2863 "LAGE3 TP53RK ZNF703"
2864 "TSEN54 ZNRF1"
2865 "MROH1 PATL1 QPRT"
2866 "DCP1A DCP1B DCP2 EDC3 EDC4 PNRC1 PPP1R35 ZNF33A"
2867 "ARFGAP2 CCDC134 HMGB3"
2868 "DOK1 LZTR1"
2869 "NUDT12 VWA8"
2870 "BTBD3 TNK1 TNK2"
2871 "FAM83B GAK USO1"
2872 "NCK1 WIPF1"
2873 "GCLC PPID"
2874 "GCLM PLAA"
2875 "GSS TXNDC17"
2876 "CSK STXBP1"
2877 "ACAD8 IARS2 LDHD"
2878 "FAM98A HSD17B10 TRMT10C WDR11"
2879 "ALDH6A1 EIF2AK2"
2880 "ALDH1B1 ALDH2"
2881 "ME3 P3H2 TTL ZNF521"
2882 "APIP TSC22D2 TSC22D4 WNK2"
2883 "MBOAT1 MICU2 NR3C1"
2884 "CCNDBP1 CERK RELT TAF13"
2885 "MSH5 PFKFB4 SGTB"
2886 "RAD54L TECPR2"
2887 "LIMK1 MIIP"
2888 "B4GALNT1 TMEM59L"
2889 "CCNJL FOXF2"
2890 "COLEC10 INHBE PTX3"
2891 "FOXF1 MGARP"
2892 "BPHL MRI1 MTERF1 PNPO"
2893 "ATOX1 LCMT1"
2894 "PPP1R3B PPP1R3F"
2895 "CSRNP2 HOMEZ PLCL2"
2896 "CLN5 DNAJC3 ERLEC1 GALNS GALNT7 HSPA13 IMPAD1 MANBA MGAT1 OS9 PAM POGLUT1 SDF2 SEL1L SGSH SIAE SIL1"
2897 "GUSB MAN2A1 MAN2B1 MEGF8 NAGLU SCPEP1"
2898 "B3GNT2 FAM3A"
2899 "FLVCR1 NDFIP1 NDFIP2 TNFRSF10B"
2900 "IFNGR1 OSTC RNF149 TMEM59"
2901 "AMIGO3 IGSF10"
2902 "ADAM11 ADAMTS2 BMP7 BMP8B CA11 ECT2L HAPLN3 PCOLCE2 SUSD4 VWDE ZNF589"
2903 "RAP2C SNAP23"
2904 "PLCD3 RALB"
2905 "INCENP KDM2A MSL1 PHF8 RPS19BP1"
2906 "RNF20 RNF40"
2907 "ARHGEF18 MAPK9 NARFL RNF114 RNF31"
2908 "SLCO4A1 ZCCHC14"
2909 "HBP1 PAPD7 RMND5A WARS2 ZCCHC2"
2910 "NCOA4 OSMR"
2911 "CEP57 USP43"
2912 "ADAM17 PTK7 PVR"
2913 "C15orf39 KRBA1 L3MBTL3 PRMT2 RIC8B SETD5 TRAPPC2 USP51"
2914 "MAGEB18 PRMT8 SUCNR1 TIGD7"
2915 "DMKN RBM24"
2916 "KDELR3 LPAR1 LPAR6 MFSD5 SLC7A3 TMEM164"
2917 "ATP5J2 P2RY12 TTC39A"
2918 "ARL10 CACNG4 HEY1 HEY2 HEYL NR2E1"
2919 "ADAL EIF4EBP2 GGA1 NDRG3 PPM1H PSTPIP1"
2920 "MAF1 TSR3"
2921 "BTBD11 DEAF1"
2922 "GOLT1B PTGES RNF185 TMEM199"
2923 "CXCR4 VKORC1"
2924 "CCDC115 NBEAL1 SARAF SPAST"
2925 "NCKAP5L PTEN"
2926 "EARS2 RAB33A TACO1 TRMT11"
2927 "C14orf2 SFXN2"
2928 "GNPDA1 GNPDA2"
2929 "CD3EAP IQGAP2 PDCD2 POLR1B POLR1D RRN3 TWISTNB"
2930 "CCSER2 ZNF616"
2931 "CDCA5 KIAA0586 TICAM1"
2932 "ESYT2 SLC43A3"
2933 "DGKH MTHFSD TRAF6"
2934 "EPX UBAC2"
2935 "GOLT1B PTGES"
2936 "CCDC88C KATNA1"
2937 "ABHD10 ACSS1 DLGAP4 PPA2"
2938 "ABCC2 SH3GL3"
2939 "SOS1 TRIM56 VAV2 ZC3H12A"
2940 "SH3GL1 SH3GL2"
2941 "ATN1 RERE"
2942 "GSTM1 NEGR1 RAC3 TIMM23"
2943 "SLC35F6 TOMM20"
2944 "SLC25A46 TMEM126A"
2945 "SZRD1 UBAC1"
2946 "ENAH NUDT8 RNF123"
2947 "DDX58 TRIM25 WARS"
2948 "PEX16 PLD6"
2949 "FAM174A MANEAL NPTX1"
2950 "CACNA2D3 GALNT16"
2951 "RUNX1 TRIM56"
2952 "CDA RILPL1"
2953 "LYPD6 S1PR5 TMEM245"
2954 "ARF1 GSTM5"
2955 "ARF5 RAB5B RHEB"
2956 "KCNH1 PDZRN4 TSSK2"
2957 "RAD51B RAD51D XRCC2"
2958 "MELK RAD51C SENP5"
2959 "CDC45 SLCO4A1 XRCC3"
2960 "CBLB ZBTB10 ZFP1 ZNF331 ZNF696 ZNF7 ZSCAN25"
2961 "NEK3 PTCD2"
2962 "C3orf38 C9orf72 TOR2A"
2963 "CTBP1 ZBTB18 ZEB1 ZNF516"
2964 "NOL4 NOL4L"
2965 "LCOR LCORL PLEKHA3 ZEB2"
2966 "E2F7 ENKD1 RCOR2"
2967 "ACTR3B ANKRD12 MAP3K2 MAP3K3"
2968 "PGAM2 PGAM4"
2969 "FBXL16 PPP2CB PPP2R5C PPP2R5E"
2970 "IGBP1 PPME1 PPP2CA PPP2R1B PPP2R5A PPP2R5D"
2971 "CTTNBP2NL FGFR1OP2 MOB4 SIKE1 SLMAP STK24 STRIP1 STRIP2 STRN STRN3 STRN4"
2972 "CASP8 PPFIA3"
2973 "FAM122A PPP2R2A PPP2R2D"
2974 "FAM13A FMNL3 FOXC2 PCGF2 PPP2R3A PPP2R3B PPP2R3C TBCCD1 ZGRF1"
2975 "CDCA4 NAB1 PRR14"
2976 "PPP2R2B ZNF746"
2977 "LYPD6 S1PR5"
2978 "ELOVL2 KDELR3 ORMDL2 PIGW SLC39A4"
2979 "EDA IL9R"
2980 "MFSD12 NRIP3"
2981 "ATAD3C PLAC1 RIC3"
2982 "PARD6B WWC1"
2983 "C1orf27 CD99L2 GGCX MARC1 OSTC RICTOR"
2984 "CERK FAM89A FRMD6 KCTD17 KCTD5 PTPN4 THAP9"
2985 "GORAB KCTD2 POLK"
2986 "FBXO31 ITPRIPL2 KIF26A MEF2A SNX29"
2987 "CDK17 FEM1A"
2988 "CCNG1 CPSF4L"
2989 "CD276 CD58 KIAA0319L RASD2 SLC38A2 SPPL2A"
2990 "EGFL8 SLC4A7"
2991 "AKR1B10 BCL10 PTPN9"
2992 "ACBD5 PCDH1"
2993 "AKR1C2 AKR1D1 UFM1"
2994 "B4GALT1 C3orf58 CCND2 GLCE OGFR RCHY1"
2995 "B4GALT1 ORMDL2"
2996 "ALG9 GPC4 GPX8"
2997 "C3orf58 UGT8"
2998 "B9D1 B9D2 TMEM231"
2999 "C20orf27 LRCH1"
3000 "NUDT4 OAS3 OSBPL1A PAPOLA"
3001 "IMPA1 ISOC1"
3002 "CSK LCP1 NARS"
3003 "PPID STXBP1"
3004 "ESRP2 MOB2 NUDT1 TTBK2 URM1"
3005 "DCBLD1 EFNB3 ERBB3 FGFRL1 FUT4 GAL HLA-DPA1 HS3ST3A1 IL27RA KLRG2 NMU"
3006 "FKTN RAB39B SEC61A2"
3007 "CRELD2 PALD1"
3008 "ACBD3 NT5C2"
3009 "SMS UBA6"
3010 "ALDH5A1 CKMT1A CKMT2 DLG2 DLG3 DLG4"
3011 "AKR1B15 SPP1"
3012 "MYO1F TIMP2"
3013 "ATP13A1 CLPTM1 TMEM38B TMX2"
3014 "CYP51A1 DHRS7 EPHX1 ERGIC1 RETSAT TEX264"
3015 "HMOX2 MARCH5 POTEE"
3016 "LCLAT1 THEM6"
3017 "POR SEC63"
3018 "C3orf52 GDF11 LIPH"
3019 "B4GALNT3 B4GALNT4 LRRTM4 PILRA"
3020 "PHF13 TBX20"
3021 "LRRC41 RIOK1 SIRT1"
3022 "EMC1 EMC10 EMC3 EMC4 EMC6 EMC7 EMC8 KCNK16 MMGT1"
3023 "ZNF268 ZNF589"
3024 "ARAP1 FCN3 PHLDB2 PLEKHO1 SHCBP1"
3025 "ALDH6A1 RFTN1"
3026 "EEF1A2 FNBP1 OSTM1 YIPF1"
3027 "CNN1 PYURF TPPP3"
3028 "C21orf59 IREB2"
3029 "KTI12 MTMR2"
3030 "QRICH1 TAB2"
3031 "CLEC4C ENPP2 PIF1 PIWIL1 TPPP2"
3032 "FKBP14 IDS PPT2 TYSND1"
3033 "PCSK6 SMPD1"
3034 "FAM169A THYN1"
3035 "CDKL5 FBXL17 KLHL20 NRGN"
3036 "AREL1 RHBDF2"
3037 "DOPEY1 HIVEP3 PLCB2"
3038 "NFATC3 SUFU"
3039 "COL7A1 NLRC5"
3040 "SPIRE1 ZBTB25"
3041 "CRIPT DNMT3A GPBP1"
3042 "ASF1A C15orf41 CABIN1 CDAN1 HIRA UBN2"
3043 "DALRD3 PHYKPL RBKS ZADH2"
3044 "CAP2 DCUN1D1 GMFB PSMD5"
3045 "CPA6 FBXO15"
3046 "FAM118A FAM160B1 PDSS1"
3047 "DUS4L KPNA5 LRIG2 PIGQ TCTN3"
3048 "CREB5 DENND3 TRIB1"
3049 "APBA3 PLEKHM2"
3050 "TMEM208 TMEM5 WAC"
3051 "DHX40 HELLS KIF2C"
3052 "LMTK2 PICK1 RAB37"
3053 "PPP1R14B SLC25A44"
3054 "DUS2 HID1 METTL5 PRMT7 RNASEH1 RXRB THUMPD3 ZWILCH"
3055 "PDZRN3 PPP1R36 TAF7L"
3056 "CTAG2 FAM13C NYX OLFM2 SIGLEC12 STPG2 TUBA3C"
3057 "DET1 ETV1"
3058 "KDM4C YTHDF2"
3059 "DSCAM GABARAP RWDD2A"
3060 "NAP1L5 SKIL TSPYL4"
3061 "CLPB KIAA1456"
3062 "CASZ1 MAPK12 TTC39C"
3063 "SUMO4 XYLB"
3064 "HOXB6 MYLK3"
3065 "ANKRD30A KY TAF2 TAF7 TMEM30B"
3066 "AFF3 ANKRD36B ATAD3C FAM58A SCAPER TAF1 TAF11 TAF3 TAF4B TAF6 TAF8 TAF9B"
3067 "DHX34 SFMBT1 TAF1L TAF4 TAF5"
3068 "CFAP58 EPB41L4B TAF10 UBAP1"
3069 "PLEKHA8 RUSC2"
3070 "MAGI2 NR4A2 RHBDL1"
3071 "HMGCS1 PAK2 TXLNA"
3072 "DPYD HPD"
3073 "CIC ZFAND6"
3074 "FANCG KIAA1143 KIF15"
3075 "TRUB1 TXLNG"
3076 "DAPK1 PHLPP2 RAD51AP1 USP46 WDR20 WDR48"
3077 "FAM189A2 KCNG1 RHBDF2"
3078 "GRAMD1C PHF20"
3079 "SCARA3 SDCCAG8"
3080 "CPD FAM3C PTGFRN"
3081 "GIGYF1 NET1 ZBTB49 ZNF140"
3082 "ACOT2 ARG2 CNTNAP1 DNLZ SEC22A"
3083 "NLRP8 PDIA2"
3084 "PCDH11X RASGRF1"
3085 "ARMC3 CCDC181"
3086 "CCDC154 TEX11"
3087 "CFAP53 DMRTA2"
3088 "CLEC4A GBP7"
3089 "C10orf67 SOX3"
3090 "LDLRAD4 NEDD4 PTGER3 RHBDF2"
3091 "ACVR2B FLT4 HEPACAM2 RELT"
3092 "IVNS1ABP LRCH1"
3093 "C1orf159 LRRC4B SDK1 SLC35A5 SLC36A1 TRPM4"
3094 "CHIC2 DHRS9"
3095 "SCNN1B TFEC"
3096 "ANKS1B TSHZ3"
3097 "ARHGAP25 FANCA KDM5C LONP2 MTMR8"
3098 "ELP2 ELP4"
3099 "HPS3 PNMA1 TANGO6"
3100 "AP5B1 ARHGEF1 HPS6 JMJD4 LCMT2 MSTO1 NPRL3 TROAP"
3101 "CDC123 TRIM65"
3102 "NARS2 XPNPEP3"
3103 "FEZ2 MLLT10 SCAI"
3104 "ACO1 GBE1 GCLC GCLM PLAA SGTA TBCB"
3105 "GSS PPID TXNDC17"
3106 "ART5 ZPBP2"
3107 "PIWIL2 TNN"
3108 "PPP1R1A SPEM1 ZPBP2"
3109 "LIPF LRSAM1 SLC3A1 TCN2 TRPC6"
3110 "FAXC ROS1"
3111 "NRXN2 UGT3A1"
3112 "AKIP1 CEP44 POC1B"
3113 "CA5B PNMA6A RPS4Y1 RPS4Y2"
3114 "RIC3 TAPT1"
3115 "MIEF1 WDFY2"
3116 "METTL18 NT5C3B PGM3 PGM5 TSTD1"
3117 "PAIP2 RIOK1"
3118 "GCC2 TTC4"
3119 "C6orf62 MTG1 OGFOD3"
3120 "HS2ST1 PIGU"
3121 "ANKRD30A TAF2 TMEM30B"
3122 "AFF3 ATAD3C TAF1 TAF11 TAF3 TAF4B TAF6 TAF9B"
3123 "DHX34 SFMBT1 TAF1L TAF4 TAF5 TAF7 TAF8"
3124 "CFAP58 TAF10 UBAP1"
3125 "CDKN2AIPNL PLEKHA8 RUSC2 TAF12"
3126 "CNTROB HMGXB4 SAMD4B"
3127 "BIN1 GPN2 INPPL1 POLR2M RPAP1 SERGEF SSNA1"
3128 "APAF1 CCDC91 MVK NUDT15"
3129 "MRI1 PNPO"
3130 "ADI1 RABIF UBE2R2"
3131 "RAPGEF1 SOS1"
3132 "TFDP3 ZNF630"
3133 "C2CD5 CABLES1 CABLES2 FIBP"
3134 "OASL PARP9 RIOK3"
3135 "C19orf33 COBLL1"
3136 "OSBPL3 SYNRG"
3137 "GSTA2 GSTA5"
3138 "MYO1F TIMP2 TMOD2"
3139 "FECH PPFIBP1"
3140 "NXT2 RANGRF"
3141 "FAM46A FNDC3B"
3142 "CHMP1B CHMP2A CHMP2B CHMP3 CHMP4B CHMP5"
3143 "CHMP1A IST1 MITD1 SPAST"
3144 "MYOF TAP1 TAP2"
3145 "SCFD1 VAMP4"
3146 "BNIP1 NBAS SCFD2 STX18 TBC1D17 USE1"
3147 "GOSR1 GOSR2 STX17 STX5 STXBP5 VTI1B"
3148 "BET1 STX16 STX6 STX8 VTI1A"
3149 "ENTPD5 FAM168A FBXO6 MAN2B2"
3150 "AKT2 AKT3 WBP2"
3151 "EIF4EBP1 SZRD1"
3152 "ARHGAP17 GORASP2 MRI1"
3153 "GSTCD IPPK MAST3 ULK1"
3154 "C3orf67 TMEM63C"
3155 "ERMARD NLRP4 PIWIL3"
3156 "NAALAD2 NAALADL2"
3157 "DGKQ INPP4A PDP2 TXN2"
3158 "CDK11A UBAP2L"
3159 "DTL HIVEP1 PUS7L RNASEH2B TFAP4"
3160 "CASP2 SHKBP1"
3161 "GLMP HEG1 TMEM63A"
3162 "CLCN3 CLCN5 LGALS8 SLC12A7"
3163 "ATP13A3 ITGA3"
3164 "IARS2 SHMT2"
3165 "ACAA2 ACAT1"
3166 "PIK3C2G RYR1"
3167 "ANKRD16 KIF21B TRIM14 TRMT13 UBE3B USF1 USF2"
3168 "CCNL2 GPBP1 MST1R OTUD6B OXNAD1 ZBTB43"
3169 "MAP7D3 QSOX1"
3170 "POM121 SPINT2"
3171 "SCARF2 SLC35F5"
3172 "HTRA1 MYADM"
3173 "AZI2 CALCOCO2 TANK"
3174 "PCDHGA12 ZNF621"
3175 "TRIM39 ZNF19 ZNF419 ZNF92"
3176 "BEND7 LRP4"
3177 "GPR183 NRXN3 TMEFF1"
3178 "CUTC PCBD1 TLR3"
3179 "SMDT1 TMED8"
3180 "CMYA5 FES OR5F1"
3181 "CUTC TLR3"
3182 "CCDC25 SLC25A32"
3183 "CRISPLD1 HM13 MUCL1 RNASE13 SLC38A6 SUSD1 TMEM89"
3184 "FOXS1 LACTB MIPEP NUDT8"
3185 "BIRC6 MICU2 NARS TBC1D22A"
3186 "BABAM1 FAM175B"
3187 "LRP8 NUP210L"
3188 "FAM32A PRKRIP1"
3189 "CEP112 DNAL4"
3190 "AKR1B10 DTNB TOMM20 YIF1A"
3191 "OSGIN1 RPS6KA6"
3192 "LGMN PAPSS1"
3193 "GCC1 OARD1"
3194 "SEMA4F TMEM59L"
3195 "ABHD16A ATP1A4 ENTPD7 FGFR2 GABRB3 GABRE JAG2 KCNJ8 KCNQ5 MCOLN2 MCOLN3 NXPE3 PIGM PTH1R ZACN"
3196 "DGCR2 EDA ELOVL2 FAM189B GPR52 IL20RB LRRC24 MFSD12 NMU S1PR5 SCARF2 SLC35F5 SLC39A4 TSPAN17 UGT3A2"
3197 "APMAP ILVBL"
3198 "PCIF1 PLK4 SYNPO2"
3199 "MLKL SRA1 TAX1BP3 TDRD7"
3200 "ARFGEF1 ARFGEF2 GBF1"
3201 "SLC25A44 SMCR8 ZWILCH"
3202 "GALT GNPNAT1 NUDT15"
3203 "CDCA5 PDS5B"
3204 "RAD21 SMC1B STAG1 STAG2"
3205 "ADNP MBD2 PDS5A SMC1A SMC3"
3206 "KIAA0586 TICAM1 ZNF616"
3207 "KLHL41 TRIM10 TRIM35 TRIM44"
3208 "DDX49 NSRP1 PDCD2L"
3209 "HMCES NOB1"
3210 "LARP6 RASSF1 TATDN3"
3211 "AES LCK ZBED8"
3212 "MAFK SYNM TTC3"
3213 "HPS5 PITPNM1"
3214 "C11orf54 CCDC58 NUDT9 PCYT2"
3215 "CSDE1 DROSHA"
3216 "DDX3Y EIF5A2 PPP1R16A ZFP36L2"
3217 "DTD2 LRRC8B"
3218 "CEP104 DEPDC1 KIF24"
3219 "DTL HIVEP1 PUS7L TFAP4"
3220 "CEP85L FANCM"
3221 "LRRC39 NINL"
3222 "ATG4B HEATR6 MIF4GD MTG1"
3223 "GSTCD IPPK"
3224 "AMD1 RLIM"
3225 "ALKBH3 INPPL1"
3226 "AURKC C12orf66 USP19"
3227 "CLSTN2 MMP10"
3228 "A4GALT ADORA3 CYB5D2 FNDC4"
3229 "ENTPD4 HINFP"
3230 "ALDH3A1 C14orf159 LDHAL6A UPP1 VAV3"
3231 "IFRD2 LIFR MICALL2"
3232 "HIST1H2BN KAT6B KCNK1 SLC39A7 TBC1D16 VKORC1"
3233 "IFIH1 TTC7A"
3234 "TDG ZNF518A"
3235 "OPTN TBC1D17"
3236 "MFSD5 TMEM164"
3237 "CSRP2 PDZD11 WBP2"
3238 "SARS TAX1BP3 TBCA"
3239 "OSTF1 RP2"
3240 "KCNK16 PTCRA TREML2"
3241 "LRRTM2 SLC27A3"
3242 "ERLEC1 GALNT7 IMPAD1 MANBA MGAT1 OS9 PAM SEL1L"
3243 "ARSA GALNS GUSB MAN2B1 MEGF8 NAGLU SCPEP1 SGSH SIAE"
3244 "KCNAB2 SFI1"
3245 "GDF15 SPAG1"
3246 "DVL3 RNF5 TIMM50"
3247 "CROCC MYO1F VPS29"
3248 "SLC30A4 SMPDL3B UBTD2 ULBP2"
3249 "ATP6V0D2 C1orf21 TMEM185A"
3250 "CCNYL1 EFR3B ERICH5 PAG1"
3251 "TSEN15 TSEN34"
3252 "AMMECR1 CLP1 TSEN2 TSEN54"
3253 "FAM117B GLCCI1 TRAF4"
3254 "DOK2 FBXW5 ZNRF1"
3255 "CDR2 CDR2L"
3256 "ZNF335 ZNF777"
3257 "MITF TBC1D14"
3258 "TFE3 TFEB"
3259 "ANKRD12 MAP3K2"
3260 "DIS3L2 NUDCD1 RNF214"
3261 "TRAPPC10 UBR1"
3262 "PCED1B S100PBP"
3263 "SOS2 TRPT1 ZNF330"
3264 "HERC1 RPAIN UBR7"
3265 "CAMK1 CAMK1D CAMK1G"
3266 "DSC1 SLC4A1AP"
3267 "ANKRD28 ARHGEF2"
3268 "PGGT1B TBC1D23"
3269 "AKTIP FAM160A1 FAM160A2 HOOK3 TRIM32 TSC1"
3270 "HOOK2 INPP5K"
3271 "KNSTRN SPAG5"
3272 "APLP1 APP ARSG B3GALT2 FMN2 MAN2A2"
3273 "ADCYAP1 PCSK1N"
3274 "HFE2 MALRD1 NOD2"
3275 "LGALS9B NXPH2 PCDH9 SPACA1"
3276 "ARL17B C8orf74 FGFR2"
3277 "DAGLA MCOLN3"
3278 "ABHD16A ATP1A4 GABRB3 GABRE JAG2 KCNJ8 KCNQ5 MCOLN2 NXPE3 PIGM PKDCC PTH1R S1PR2 TMEM59L"
3279 "CGRRF1 PLEKHB2"
3280 "ADAMTS20 DNASE2B"
3281 "PCBP3 PDCD2L PTPN18"
3282 "ADAT2 HECA SMUG1"
3283 "TRMT13 UBE2E1"
3284 "CHD1L NFXL1 OARD1"
3285 "CTNND2 FMNL2"
3286 "BSG NCSTN"
3287 "SPIN1 SPIN2B SPIN4 TOPORS YRDC ZGPAT"
3288 "ZCCHC7 ZNHIT6"
3289 "CKAP5 TACC1"
3290 "ACADS ALDH4A1 HMGCL"
3291 "HLA-DQB2 PRL"
3292 "DOC2A KCTD21"
3293 "CDKL5 FBXL17 KLHL20 NRGN USP27X"
3294 "ICA1 MTTP"
3295 "CTNNAL1 RANBP6 RWDD4"
3296 "JRKL TIGD2"
3297 "FOCAD IFRD2"
3298 "ABCG1 KAT6B NHEJ1"
3299 "GNPDA2 GSTT2B"
3300 "NPL USP9X"
3301 "PIP5K1C PTAR1"
3302 "PGBD5 PTP4A2 RAB31 RABGGTB"
3303 "APOBEC3C PIP5K1A"
3304 "MTCL1 PLEKHO1 PTRH1"
3305 "CLEC16A EVI5 RNF41"
3306 "PARD6G RHOJ"
3307 "ACTR3B ANKRD12"
3308 "MAP3K2 MAP3K3"
3309 "SH3RF1 TSEN2 TXNL4B"
3310 "MBOAT1 TMCO1 YIPF5"
3311 "CDKAL1 ICAM2 YIF1B"
3312 "SLC27A4 TOMM70"
3313 "ATP2A3 DAAM1"
3314 "DHX34 ZNF3"
3315 "KIF27 TBC1D7 TSC1 TSC2"
3316 "RAB43 TDP1 ZBED6"
3317 "CEP250 RUFY2"
3318 "CEP170 HERC2 NEURL4 SYNE2"
3319 "ASB7 BEGAIN SNAPIN"
3320 "GRK5 PRIMPOL UBN1"
3321 "ALOX15B NALCN SLC2A9"
3322 "COLGALT2 TMEM255A"
3323 "KCNMA1 PRTG TTLL11 UNC80"
3324 "CNTNAP4 EFHB LCTL MAATS1"
3325 "ATRNL1 CNTNAP5 CYP2C8 LCTL NPHS1"
3326 "ADRA2C WNT2B"
3327 "CAMSAP2 MARK1 PSAP UBE2B"
3328 "HABP4 MAP4K3 TMA7"
3329 "MLH1 PMS1 PMS2"
3330 "ABCA2 RNASEH2B"
3331 "CA11 GDF11"
3332 "FARS2 ZNF70"
3333 "BTBD7 CBLB"
3334 "SESN3 ZFP1 ZNF331"
3335 "ZBTB10 ZNF7"
3336 "CAPNS2 CAST LIX1L"
3337 "BCL11A PHF20L1"
3338 "CREB5 FOS TRIB1"
3339 "ATF2 ATF7 FOSL2 JUN"
3340 "ETS2 RFWD2 TRIB3"
3341 "ETV5 STK40"
3342 "ANKS6 RWDD3"
3343 "CREB5 FOS"
3344 "ATF2 ATF7 FOSL2 JUNB JUND"
3345 "ATF3 JUN"
3346 "ETV5 STK40 TRIB1 TRIB3"
3347 "FCRL4 MUC15"
3348 "EID2B MAGEE1"
3349 "CENPJ EDRF1 FNBP1L PUS7L"
3350 "CDC42BPA LURAP1L"
3351 "RAB11B SNTA1"
3352 "GALE GALK2 TP53I3"
3353 "LRRC41 POLD4 QKI RIOK1"
3354 "GAR1 KIF16B PRMT1"
3355 "CLNS1A COPRS PRMT5 WDR77"
3356 "ADAP1 HIST2H2AB HLTF MAP7D1"
3357 "API5 EIF4B"
3358 "ANLN API5 EIF4B"
3359 "PAN2 TICRR"
3360 "CCNJL FOXF2 IL12RB1"
3361 "COLEC10 INHBE"
3362 "CD274 NCKAP1L UTP20 VPS53"
3363 "RPTOR VPS51 VPS52"
3364 "ARHGAP25 MTMR8"
3365 "DNASE2 H6PD"
3366 "PPCDC THG1L ZNF524"
3367 "EPX OSMR"
3368 "ALB BPIFA1 MUC5AC"
3369 "DDX20 GEMIN4 PCDHB15"
3370 "AMFR DERL1 TRAM1 WDR41"
3371 "PLAU PPP4R4 SERPINE2"
3372 "AFTPH FAM83G"
3373 "FRYL HDAC7 OARD1"
3374 "DPY19L3 GCNT2"
3375 "GHITM MTX1"
3376 "ATP2A1 ROGDI"
3377 "PACS2 TK2"
3378 "ARHGAP5 CLUH KIF15"
3379 "AASDH GPSM2 ZHX3"
3380 "ANKRD36 CEP63 IFFO1 MTFR2 STXBP6 ZNF101 ZNF791"
3381 "FAM89A FRMD6 KCTD17 KCTD2 KCTD5 POLK PTPN4 THAP9"
3382 "GORAB RAPGEF1 SOS1"
3383 "AKAP10 C1orf198 DMTN TRAPPC10 UBR1"
3384 "ALDH8A1 COX17 CRYL1 MSRA MSRB2"
3385 "ENGASE LIN7B"
3386 "GSTA1 GSTA4"
3387 "GEM KNDC1"
3388 "CCSER2 ESYT2 SLC35F6 SLC39A7 SLC43A3 ZNF616"
3389 "C1GALT1 KRT222"
3390 "CD27 CD70"
3391 "BIRC2 TRAF2"
3392 "ANKRD16 SPRED2"
3393 "MYH9 MYL6"
3394 "DDIT4 DTWD1 KIAA1586 SPACA1"
3395 "CASP1 GAB1 GTF2H2C TET2"
3396 "CCNH CDK7 ERCC2 ERCC5 GTF2H5 MPLKIP PTS"
3397 "GTF2H1 GTF2H2 HMGN3 MNAT1"
3398 "ADARB1 ERCC3 GTF2H3 GTF2H4 PXK WDR55"
3399 "MCPH1 PARD3B"
3400 "PARVG POLK"
3401 "GCLC GCLM MTOR PLAA"
3402 "ACACB FUNDC1 MYL4 POFUT2"
3403 "BPGM KLF16"
3404 "CRABP2 METTL18 MTRR SACS TRIM29"
3405 "DCBLD2 RCN3 SEMA3C"
3406 "AURKB DDX47 ESF1 GFPT2"
3407 "SCARB1 TMEM97"
3408 "ITGA6 M6PR"
3409 "STK39 WNK1"
3410 "DENND4A METTL6 PANK3"
3411 "C11orf54 ITPA NT5DC1 PCTP PDXP PEF1"
3412 "AACS C12orf57 C9orf64 LACTB2 POLL UBE2D3"
3413 "CLEC11A RASSF2 STK3 STK4"
3414 "PCBP2 SAV1"
3415 "GFAP MRS2"
3416 "DMRT2 MYO3A"
3417 "ELK4 EMC6 MBP RAD51"
3418 "INPP4A PDP2 PELI1"
3419 "ACADM NCEH1"
3420 "CS ETFA IDH3A SUCLG2"
3421 "AK2 CPT1A LETM1"
3422 "BANP VMAC"
3423 "EPS15L1 USP47"
3424 "ARHGEF38 LINGO3 NLRP5 PIWIL4 TTLL9 ZBTB7C"
3425 "KNDC1 SHROOM4"
3426 "CCDC65 CELF4 GABRB2 H1FOO IDI2 NLRP2"
3427 "ACTN3 ALPI GABPA SIK2 SRGAP1 ZNF706"
3428 "ABCC1 ATP13A3 LNPEP RHEB TMEM30A"
3429 "APOBEC3D TAF1L"
3430 "CHST1 NAV3"
3431 "GDA HNMT"
3432 "SENP8 WDYHV1"
3433 "ATG16L2 FAIM"
3434 "ECE1 LDLR PNMA2"
3435 "NRP1 PLXNB1"
3436 "KRT6B UNC119B"
3437 "MAGEB18 PRDM16 PRMT8 SUCNR1 TIGD7"
3438 "NOVA1 PCLO RADIL"
3439 "AMER1 C1orf226 CRY1 CRY2 FAM199X GULP1 KIAA0232 NAGPA PER1 REXO1 SNX24 STOX2"
3440 "HIPK2 RAVER2 SATB1 TBX20 TLE1 TLE4 TRAF3IP2"
3441 "NAT8L PJA1"
3442 "IL2RG REEP6"
3443 "CCNYL1 CSNK1G1 CSNK1G2 EEPD1 EFR3B ERICH5 NCS1 PAG1 UBTD2"
3444 "NEURL1B SPDEF"
3445 "C5orf30 UBXN11 UNC119"
3446 "MAGEB18 PRDM16 PRMT8 SUCNR1 TIGD7 ZSCAN1"
3447 "DPPA4 SDR9C7"
3448 "IGSF9 PDE1C PSAPL1"
3449 "CUL9 MDM4 PPARD TP53"
3450 "CHIC2 DHRS9 GLMP"
3451 "COA1 LRRC8C"
3452 "KLK8 SLC2A8"
3453 "CLYBL MFSD10 MYH2 SPARC SSBP1"
3454 "BAK1 BBC3 MCL1 STARD9"
3455 "FZD3 KLC2 KLC3 SYNE4"
3456 "FKRP SLC6A15"
3457 "DAD1 ERGIC1"
3458 "CHCHD4 CLCN2 FOXN3 PEX10 ZCCHC10"
3459 "DAPK2 DESI1 GPAM KAT6B PHLPP1 R3HCC1 TNRC18 TRAK1 TRERF1"
3460 "CPA4 DNAJB5 RNF115 TMEM62"
3461 "SLC25A36 TCP11L2"
3462 "CNNM4 MGAT4B"
3463 "MAN1B1 ST3GAL4"
3464 "ARID3B SNX33 TAF13 VANGL1"
3465 "COPRS OTUD4"
3466 "KRT10 KRT16 KRT17 KRT5 KRT6C KRT75 KRT79 KRT8"
3467 "GLRX2 ISCU"
3468 "TACO1 TRNT1"
3469 "CMC2 NUDT19"
3470 "COA6 NT5C3A"
3471 "ACOT2 ARG2 DNLZ"
3472 "SPINK5 VSX1 WBP2"
3473 "CHMP4A DGCR8 MTUS2 SEC14L2 TFG"
3474 "ABHD17B DAGLB"
3475 "PTPRF PTPRS"
3476 "ETV5 LZIC MOB1B SLC25A35"
3477 "ARL2BP EFHD1 FSD1"
3478 "DET1 ETV1 STK40"
3479 "EEF1A2 SAR1A"
3480 "CLPB HAX1 KIAA1456"
3481 "ADARB2 TRAPPC6A"
3482 "ANKRD29 TFCP2"
3483 "FAM122B NAV1"
3484 "SLC39A10 SLC39A6"
3485 "NYX STPG2"
3486 "ACKR3 GJB2"
3487 "RC3H1 SPRY2"
3488 "ASPHD2 ELF2 LRP12 TPCN1 VANGL2"
3489 "CHEK2 METTL2A"
3490 "C2CD5 CABLES2 FIBP"
3491 "BSG NCSTN PSEN1"
3492 "DNAH14 DNAJC14"
3493 "ANKRD13C LAPTM4A SLC19A2 TCAF2 ZNF627"
3494 "CAMKK1 PHGDH"
3495 "CSNK1A1 CSNK1E GAPVD1"
3496 "FAM213B NUCB1"
3497 "ACVR2A BMPR1A MELK NCOA4 OSMR PLCB1 TGFBR2"
3498 "DHX29 EEFSEC GTPBP1"
3499 "MTX2 MTX3"
3500 "MT-CO1 WFS1"
3501 "ABHD17A TCTEX1D2"
3502 "LMBRD2 TM7SF2"
3503 "C9orf24 TMPRSS3"
3504 "KIAA0556 MAP3K1"
3505 "MDH1B MROH2B PSD"
3506 "CCDC89 CFAP57 FAM13C NAALADL1 PRSS12"
3507 "CFAP52 KLHL10"
3508 "PRSS12 SFT2D1 SULT1C3"
3509 "ADGB ARMC3 CCDC181"
3510 "OSTM1 YIPF1"
3511 "ADCY3 RNF167"
3512 "AAGAB FAM177A1 FAM204A"
3513 "ADCY9 CXorf21 SLC15A4"
3514 "SLC12A4 SLC17A5 SLC26A2 TMEM179B"
3515 "BATF3 CREB5 TRIB1"
3516 "ALDH3B2 SLC18A1"
3517 "AGO3 LONRF3"
3518 "KRBA1 SIMC1 ZNF195 ZNF302 ZNF784"
3519 "HPS1 ZBTB10"
3520 "CKAP2 SPATS2"
3521 "CCDC57 DISC1 FAM221A ODF2L TRIM37"
3522 "CCDC113 NIN"
3523 "B4GALNT1 ENTPD7 HLA-DRB3 JAG2 NXPE3 SEMA4F SEMA6A TMEM59L"
3524 "ATP1A4 P2RY8"
3525 "ATXN3 KIF16B NFKB2 PRKCQ"
3526 "FBP1 FBP2"
3527 "IL1RN SEC22C"
3528 "APOOL F12"
3529 "CDK17 TDRD7 THAP9"
3530 "FEM1A KIF26A TGS1"
3531 "ALDH3B1 APBA3 GK5 WDR73"
3532 "CPT1C OR2W3"
3533 "ADGB DCLK3"
3534 "FAM20B SUN1"
3535 "NOMO1 TMEM87B"
3536 "ADAM17 PTK7 PVR SCARB1"
3537 "GSG1 IL37"
3538 "RASSF1 RASSF2 SAV1 STK3 STK4"
3539 "FBXO45 HDAC4 IRS2"
3540 "DNMT3B NAA20 NHEJ1"
3541 "KATNA1 KATNB1 KATNBL1 LATS1 SMAD5"
3542 "ABCG1 CCDC88C KAT6B NCKAP5L PTEN"
3543 "BLK SLC30A4"
3544 "SLC30A4 UBTD2"
3545 "C2orf69 CMTR2 DHRS2 METTL14 PRMT9 RNF135 SLBP UBAP1"
3546 "ARMC5 DEPDC7"
3547 "ANKMY1 NLRP11"
3548 "CAPN9 SETD4"
3549 "CACNA2D4 TLR10"
3550 "CNGB1 MARCO MEFV PCED1A"
3551 "CLHC1 CSMD3 NLRP9 OXCT2 PLEKHH1"
3552 "PNCK PTX4"
3553 "RHBDL1 TCL1B"
3554 "DSCAML1 MAGI2"
3555 "MAGI1 MAGI3"
3556 "HPS5 PITPNM1 ZFP36L2"
3557 "ANKS6 ETS2 RWDD3"
3558 "MAP7D3 QSOX1 SPINT2 TXNRD1"
3559 "FAM193B TRIM35 TRIM44 ZNF624"
3560 "CLEC5A KLC3 SFI1 SGCA"
3561 "FZD3 SYNE4"
3562 "KDELR3 LPAR6 TMEM184B"
3563 "ARL10 LPAR1 MFSD5 P2RY12 SLC7A3 TMEM164"
3564 "EREG SLC37A4"
3565 "DOLK GALNT8 GPR50 KDELR2 SLC16A13"
3566 "SRBD1 THAP11 ZMYM1"
3567 "HOXB6 HOXC9 MKNK2 MYLK3"
3568 "MAPK14 MAPKAPK2"
3569 "AMMECR1L DUSP16 DUSP7 DUSP9 RNF138"
3570 "CCDC117 OBSL1"
3571 "CUL7 FBXW8 TSNARE1"
3572 "ACP5 SLAMF1 SLC1A1"
3573 "FAM20B GOLIM4 KIAA1468 MGAT2"
3574 "B3GAT3 NLGN2"
3575 "C11orf54 PCTP SUOX"
3576 "MAP10 MARCKSL1"
3577 "DNAH3 RPL10L"
3578 "CCNT1 HEXIM1 HEXIM2"
3579 "DENND2D FBXL19"
3580 "FDPS GART PFAS"
3581 "BCAN VCAN"
3582 "DNAH3 L1TD1 SOS1"
3583 "CPNE8 GLOD4 SNCA TPD52"
3584 "HENMT1 RCCD1"
3585 "CCDC130 KDM8"
3586 "EGLN1 MAPK7 RABEPK"
3587 "GRN ZC3HC1"
3588 "CDK17 PCIF1 TDRD7"
3589 "MLKL SRA1 TAX1BP3"
3590 "GGPS1 TUSC1"
3591 "BIRC8 CASP9"
3592 "CAMKMT FEM1B"
3593 "TTC7B YOD1"
3594 "EDIL3 MAP2"
3595 "ARHGAP44 ARMC7 KATNAL1"
3596 "CPNE8 EFHD1 NEDD4L"
3597 "SRR UQCC3"
3598 "PCSK5 ZNF268 ZNF589"
3599 "EPHA6 GPHA2"
3600 "FAT3 NXPH2"
3601 "CASZ1 TTC39C"
3602 "CDKL2 PPP1R42 REG3G"
3603 "CDR2L ZNF335 ZNF777"
3604 "DCUN1D4 FOXO1"
3605 "GDAP1L1 SHANK2"
3606 "B9D2 EVA1B LAPTM4B PTRH2"
3607 "CA14 SLC38A7"
3608 "CSPG5 DLK1 LAPTM4A TCAF2"
3609 "FAM219A PTAR1"
3610 "PGBD5 PTP4A2 RABGGTB"
3611 "FBXL20 PIP5K1C PXN TRMT2B"
3612 "C20orf24 RC3H2"
3613 "CLEC4A GBP7 TEX11 TMEM232"
3614 "CLEC4C ENPP2 PIF1 TPPP2"
3615 "C19orf54 DVL3"
3616 "PHYKPL RBKS STARD7 ZADH2"
3617 "COA4 COX19 FAM136A MID1IP1 NUDT16"
3618 "BCS1L RBM38"
3619 "ABRACL SH3BGRL"
3620 "FMNL2 SQLE TMEM159"
3621 "LGALS9C SCAMP1 SLC26A6"
3622 "ELAC2 GTF2H2C"
3623 "DNAJB6 GTF2H4"
3624 "ACBD3 DRG2 NT5C2 SBDS"
3625 "CALD1 TOM1"
3626 "AGAP1 MUM1 RASA2"
3627 "HEG1 KIAA1549 LGALS8 SLC12A6 SLC22A23 SLC9A6"
3628 "LGALS9 LGALS9B"
3629 "AGA OSTM1 SLC12A4 SLC31A1 SLC38A9"
3630 "CLCN5 LGALS9C RRAGB SEZ6L2"
3631 "CC2D2A CFAP221 ME3"
3632 "AEBP2 CCDC71 SAP30L ZNF521"
3633 "DAPK1 DMWD PHLPP2 RAD51AP1 USP46 WDR48"
3634 "NAA30 NAA35 PPARD"
3635 "ACOT11 TEKT2"
3636 "DRD1 MMEL1"
3637 "DYSF KIF1B XRN1"
3638 "HSD17B7 PTPRS"
3639 "ALB BPIFB1 FCRLA RCBTB2 ZNF558"
3640 "BPIFA1 MUC5AC"
3641 "EBP HMOX2 LCLAT1"
3642 "PTPN1 SEC62 TOMM22 TOMM40 TRABD VDAC3"
3643 "SCYL1 TDRD9"
3644 "AUNIP AURKA C2orf49 ITPKC MTMR4 OSBPL6 TPX2"
3645 "CEP192 RAPGEF6 SYNRG"
3646 "BOLL CDC20B"
3647 "CHST4 DDX43 HES6 WNT8A"
3648 "EVC2 NLRP3 RSPH4A TDRD6"
3649 "LCMT1 TBCE UAP1L1"
3650 "ANXA11 ATOX1"
3651 "AKR1A1 CNDP2 PGLS PHPT1"
3652 "FSCN1 TXNDC17"
3653 "DOK2 FBXW5 USP12 ZNRF1"
3654 "BCR CNTN1 MTMR1 TRMT1"
3655 "CD47 ITGA2"
3656 "CECR2 SMARCA1 UNC45B"
3657 "CACNG4 DPY19L3"
3658 "CLYBL FAHD1 MCEE NUDT9 TRMT5"
3659 "CCDC58 PCYT2"
3660 "CPD PTGFRN"
3661 "KIAA1671 MAGEB1"
3662 "SH3BP1 SLC35D1"
3663 "MTCL1 PLEKHO1"
3664 "LMTK2 PICK1 RAB37 TMEM199"
3665 "DGKQ INPP4A TXN2"
3666 "BRSK2 UBAP2L"
3667 "CDCA5 KIAA0586 TICAM1 ZNF616"
3668 "RAB11FIP2 SH3BP5 SH3BP5L"
3669 "HOXC9 MAPK14 MKNK2"
3670 "ALG3 KLHL14 TSGA10IP"
3671 "RASAL1 SH3BP5 SH3BP5L SMAP2"
3672 "DNAJA3 YTHDF2"
3673 "ACOT8 ARL1 DNAJC5 OAT"
3674 "ALDH1B1 ALDH2 ALDH6A1 LGMN"
3675 "GPT2 MDP1 PCSK5 PTPN18 ZNF268 ZNF589"
3676 "CD58 RASD2 SLC39A14"
3677 "CD276 SLC38A2 SPPL2A"
3678 "FBXO3 NUDT15"
3679 "DDHD2 SPAG9"
3680 "ASAP2 WIPF1"
3681 "SESN3 ZBTB10 ZFP1 ZNF331 ZNF7"
3682 "MDN1 NF1"
3683 "CENPF NOL9"
3684 "BEND7 ZNF296 ZNF423"
3685 "LRP4 ZNF621"
3686 "CNTN1 DCK DGUOK DNM1 EDIL3 MAP2 PPP3R1 SEPT3 VAMP2"
3687 "ANK2 CDH13 EPB41L1 GNAO1 MAPRE3 MAPT NAPB TRIM3"
3688 "HPCAL4 SLC12A5 SNAP25 SYN1 SYT1"
3689 "AMPH ATP4A CAMKV CRMP1 DPYSL3 GNG2 KIF5C LSAMP SCAMP5 SNCB STX1A STX1B"
3690 "PAPLN SNAP91"
3691 "CTSA GLB1"
3692 "ENTPD5 FAM168A FBXO6 PPT2"
3693 "TUBA8 ZNF317"
3694 "EFHD2 GOLGA3"
3695 "CLASP1 MAP1A MARK2"
3696 "NAP1L5 TSPYL4"
3697 "ADO SMDT1 TMED8"
3698 "ACBD7 ADPRHL2 POMP UBE2C YRDC"
3699 "ENOPH1 NUDT2"
3700 "FAM206A POLQ PUS10"
3701 "ARMC4 LRRCC1"
3702 "KLHL9 RBM11"
3703 "NENF POFUT1"
3704 "ARHGAP27 CCNDBP1 SEC14L1"
3705 "DPCD INO80E KLF5"
3706 "KPRP SBSN ZNF559-ZNF177"
3707 "GPHN TSSK1B"
3708 "RGCC TLN2"
3709 "MTHFR RASSF2"
3710 "RASSF1 SAV1 STK3 STK4"
3711 "BCL2L12 PPP1R9A"
3712 "CFAP70 PFKFB1"
3713 "CNTN4 HDGFL1"
3714 "MAOA PLCB3"
3715 "BTBD16 DNAI1 NLRP8"
3716 "GRK4 RBM12 SBNO1 UNK"
3717 "MADD MDM2 PPARD RIC8B"
3718 "ATP6V1E2 POTEF SMPD1"
3719 "NAA30 OGFOD1"
3720 "AURKB FIGNL1 GATB GFPT2 PPT2 RPP30"
3721 "BCL6B SULT4A1"
3722 "LIFR OSMR"
3723 "CCDC102B GLIS3"
3724 "C1orf226 CRY2 FAM199X GULP1 KIAA0232 NAGPA REXO1 STOX2 TEKT4"
3725 "APC SCRIB"
3726 "SYNGR2 ZDHHC13"
3727 "ADCY6 FLT4 HSD17B6 SLC6A6"
3728 "ATP2B4 RAP2A"
3729 "BSCL2 IL20RB"
3730 "TCAF2 VSIG4"
3731 "CAD METTL7A TCF12"
3732 "ID1 TCF3"
3733 "MXD4 ZCCHC14"
3734 "HBP1 PAPD7 RMND5A ZCCHC2"
3735 "NUDT18 SEMA3B SLCO4A1"
3736 "CA2 CSTB PSAT1"
3737 "DNAJC7 HSPA2 LRRC28 RSAD2"
3738 "ETV6 HSPA1L PCBP4"
3739 "CRLF3 ENPP6 MEX3B"
3740 "RNF19B YY1AP1"
3741 "CLK2 LARP1B LSM14B MKRN1 PABPC4L RBM23"
3742 "THG1L ZNF524"
3743 "ARAP2 ARHGEF11"
3744 "PGK2 ZFAND5 ZFAND6"
3745 "PTGES2 SHISA2 UGT2B10"
3746 "ADO GPR183 SMDT1 TMED8"
3747 "KRT6B PCDHB15 TOMM22"
3748 "CDKL5 RABL6"
3749 "BCL9L CMTR2"
3750 "ACAP2 MTMR12"
3751 "BTBD19 NAALADL1 SLC35B4"
3752 "CHMP7 DDX59 VASP"
3753 "IP6K1 UBXN4"
3754 "AKT3 EIF4EBP1 SZRD1"
3755 "CHEK2 RC3H1 TNRC6C"
3756 "ACOT13 DRG2 NARS NT5C2 SBDS TBCB TXNDC12 UBA6"
3757 "IGSF3 PLD2 TGFBR2"
3758 "ACVR2A BMPR1A NCOA4 OSMR"
3759 "ERBB2 RDH10"
3760 "ACOT7 DHRS4 DHRS4L2 HIBCH"
3761 "RASGRF2 STYK1"
3762 "ANKRD65 CACNG8 NLRP13 VSIG1"
3763 "NLRP14 SLC2A7"
3764 "AK3 C11orf54 SUOX VWA5A"
3765 "CCDC58 NUDT9 PCYT2"
3766 "DUSP11 RBM45"
3767 "GSPT1 HSCB METAP1D"
3768 "ARAP1 FCN3"
3769 "ATG7 DPP9 DSC3 HS2ST1 RAB9B RABGGTA RWDD2A"
3770 "CFAP45 HGF NLRP10"
3771 "ADAP2 UGT1A4"
3772 "PLIN4 TNR"
3773 "MBL2 TTC38"
3774 "LAMB4 PLIN4"
3775 "CNTN5 LDHAL6B LIPM"
3776 "FAM114A2 PLEKHB2"
3777 "DENND4A METTL6"
3778 "ASAP3 HECW2 NEDD4L WWP1 WWP2"
3779 "GSTO2 NOS1 TLL2"
3780 "GAPDHS INSL3 KLRF1 MEIOB SLC45A2 SPZ1"
3781 "CBWD5 RIMKLA SERPINB11"
3782 "DNAJC10 DNM1L ELMO3 ZNF541"
3783 "LSM12 PAPLN SNAP91"
3784 "CTAGE5 MTMR14"
3785 "MIA3 SIGLEC12"
3786 "MARC1 SEC63"
3787 "C1orf27 UFSP2"
3788 "SEC62 TOMM40"
3789 "ALG5 EBP LCLAT1 LEMD2 PTPN1 TMX4 VKORC1L1"
3790 "HMOX2 POR"
3791 "THEM6 TMX2"
3792 "DNAJC10 EGFL7 EGFL8"
3793 "IMPA1 ISOC1 PLEKHF2"
3794 "GPR50 HLA-G"
3795 "JMJD8 ST6GALNAC5"
3796 "DGAT1 MFSD3"
3797 "ADAP1 EIF4B LDHD MAP7D1"
3798 "ANLN API5"
3799 "ATP12A NOP9 NPC2"
3800 "NOL9 NOM1"
3801 "SYK YTHDF2"
3802 "ALAS2 CNBP DGKG NFASC PRUNE2 RNF133 SFTPA2 TNNI1"
3803 "CRNN MUC7"
3804 "B3GALNT1 CST1 CST2 CST4"
3805 "ALOX12B ALOXE3 CAPNS2 CIDEA CPA4 DPPA4 FLG2 GLIPR1 GSDMA HAL IL36G KIR3DS1 KLK7 LOR NCCRP1 PLCZ1 RNASE7 SDR9C7 SERPINA12 SERPINB7 TGM1 TGM3 VEGFA VEGFB"
3806 "ASPRV1 ELMOD3 FLG KLK5 SERPINB4 TGM5 UCP2"
3807 "ARL6IP1 FGD5 GNAO1 TMEM222"
3808 "GNG11 RGS12 RGS14 RIC8A"
3809 "GNG10 GNG4"
3810 "CCDC183 FOXP1 MEX3B TMF1 TNFAIP8L1"
3811 "GLIPR1L2 TDGF1 ZMYND19"
3812 "C14orf80 CEBPA RUNDC1"
3813 "DZIP1 GAS8"
3814 "BTBD16 DNAI1 OTUD6A"
3815 "IQCH WDR78"
3816 "IGLON5 PRSS48"
3817 "DHRSX ZBED1"
3818 "ACVR2B HEPACAM2"
3819 "COA6 NT5C3A PTK2B TSTD2"
3820 "CHAD CNPY4"
3821 "CCPG1 MBTPS2 UBB"
3822 "ENTPD5 FAM168A FBXO6"
3823 "DNAJC28 SLC19A2"
3824 "CLEC5A TMBIM6"
3825 "PDE4DIP PXN"
3826 "ACOX3 KIAA1217 PLEKHA5 VASP"
3827 "ABHD12B OGFOD1 RWDD1"
3828 "MADD PPARD RIC8B TSC22D3"
3829 "MDM2 PHOSPHO1"
3830 "NAA30 NAA35"
3831 "FAM9A MAGEB6 NAP1L3 ZNF93"
3832 "CCDC170 CNGA2 SCNN1B TFEC"
3833 "SIVA1 UTY"
3834 "PNRC1 ZNF33A"
3835 "C5orf30 FIGNL1 UBXN11 UNC119 ZBTB9"
3836 "LRRC39 MIPOL1 NINL"
3837 "SH3GL1 SH3GL2 SH3GL3"
3838 "ATP13A5 CLCN4 TMEM132B"
3839 "BEST3 ITGB1BP2 PXDNL"
3840 "APEH HSPA4L NPEPPS"
3841 "LNX2 TTC7B YOD1"
3842 "CPVL CTSO OTUD5"
3843 "ABCC9 CCDC175 EN2 TFPI2"
3844 "FGFR3 LSM12"
3845 "COL9A1 PPP1R12C"
3846 "DNAJC10 SLC25A13 SLC25A18 SLC25A22"
3847 "BBX DNAJB6 PHAX"
3848 "IGF1R INSR SGCA"
3849 "EML1 PPM1E"
3850 "ELOVL1 PON2 TIMM50"
3851 "ATAD3A AUP1 FADS2"
3852 "ALDH3A2 ATAD3A GLOD5"
3853 "DPM1 NDUFA4"
3854 "ALDH1L2 C1QTNF9 C1QTNF9B COLGALT2"
3855 "BMP7 BMP8B PCSK5"
3856 "AMIGO1 AMIGO3 ART5 C1QL4 CHSY3 CMTM8 CNTNAP3B FUZ LINGO1 NRSN2 NXPH4 PLAT SBK2 SEMA4F ST6GALNAC3 SULF2 TCTN1"
3857 "ADAM11 ADAMTS2 HAPLN3 VWDE ZNF589"
3858 "KRT73 TICAM2 TTLL7"
3859 "KDR METRNL RIMS1"
3860 "FAM118A GTF2E2 PDSS1 SPOCK1"
3861 "CUEDC2 GTF2A1 GTF2A2 GTF2E1 SUPT4H1"
3862 "ATF6B DOK2"
3863 "CBFA2T2 PRDM6"
3864 "C8orf74 FGFR2"
3865 "B4GALNT1 JAG2 NXPE3 TMEM59L"
3866 "ARL17B EPHA5 MAP1LC3B2"
3867 "CYP2R1 DNAJC27 KCNK15 TTLL2"
3868 "EVPL SACS SERPINB2 TRIM29 ZBTB41"
3869 "CRABP2 GM2A ICAM1 POF1B S100A14 S100A16"
3870 "ALDH1B1 HSDL2 SCP2"
3871 "ALDH2 DNAJC5 LGMN"
3872 "ADCY4 LHX6 ZNF75A"
3873 "HM13 MUCL1 SLC38A6 TMEM89"
3874 "CRISPLD1 RNASE13 SUSD1"
3875 "CACNG4 PTPRU"
3876 "CARD9 CEP135 CEP290"
3877 "ENO3 PGK2"
3878 "GLRB LINGO2 ZBTB7C"
3879 "ECEL1 HLA-DQB1 LRRC24"
3880 "BOLA3 NUDT6 SHC4 THEM4"
3881 "ENDOG PM20D2"
3882 "KCNA3 UBAC2"
3883 "HERC3 RCBTB1 TMEM62"
3884 "DOK2 USP30"
3885 "BCDIN3D PCDH15"
3886 "ENGASE GSTA3"
3887 "APBA1 LIN7C"
3888 "ABLIM2 LIN7B"
3889 "B3GNTL1 TTC5"
3890 "AK2 ARF4 CLEC3B TAGLN2"
3891 "LZIC MTRF1 SLC25A35"
3892 "NFYB NFYC"
3893 "EEPD1 MOB1B"
3894 "DYNC2H1 S100A6 S100P"
3895 "PLCB3 S100A4"
3896 "KRTAP13-2 PITRM1"
3897 "RUFY1 RUFY2"
3898 "B9D1 TCTN1 TMEM231"
3899 "ADD2 HMGN1 TRPV5"
3900 "QSOX1 TRPM1 TXNRD1"
3901 "C6orf163 C9orf135 LRRC3B TEKT3"
3902 "ADAMTS15 FBXW12 SEMA3E"
3903 "FBXL7 LONRF2"
3904 "ADAM8 DDX53 DYNLRB2 LCA5L NAA11 SFTPD STARD8"
3905 "EBF4 ENPP7"
3906 "CAD EIF4ENIF1 TCF12"
3907 "AKR1A1 IDH1"
3908 "IKBIP TOX3"
3909 "HDAC6 UBL7"
3910 "RYR2 UBQLN4 ZFAND1"
3911 "ATP7A BSG NCSTN"
3912 "F5 MMRN1"
3913 "CTSH CTSL"
3914 "CEP152 FAM117B GLCCI1 MARK4 PHF19"
3915 "KLHL21 ZBTB44"
3916 "CGRRF1 PLEKHB2 TMEM201"
3917 "LRP1B RSPO1"
3918 "CTSV EVPL PPL SERPINB2 ZBTB41"
3919 "CTF1 LGR5 RASSF6"
3920 "ANKRD26 WAS"
3921 "CCSER2 SLC43A3"
3922 "GNMT PAH UPB1"
3923 "POLG2 RLF SUV39H2"
3924 "AP4E1 AP4M1 AP4S1"
3925 "EHMT2 REEP4 ZNF644"
3926 "DENND4B PRICKLE3 TBC1D9"
3927 "ATP1A4 JAG2 NXPE3 P2RY8"
3928 "GPALPP1 LRRC41 RIOK1 TBX3"
3929 "CACNA2D4 NSUN7 PTPN6"
3930 "DMRTA1 TLR10"
3931 "MYO7A TRPA1"
3932 "NR5A2 RLBP1"
3933 "C12orf57 DNPEP PLCD1 PRPH TNXB ZFYVE16"
3934 "LGALS12 VPS13C"
3935 "ERGIC2 ERGIC3"
3936 "DOLK KDELR2 KLK11 SLC16A13"
3937 "ACAD8 LDHD"
3938 "KANSL1L TMEM208"
3939 "ATP5E EPM2AIP1"
3940 "MCC RASAL2"
3941 "ARHGDIG SAG"
3942 "CCNJL FOXF2 PAX3"
3943 "MAP7D2 ZCCHC12"
3944 "GIPC3 MYEOV PRTFDC1"
3945 "APOBEC3D BRWD1 SHC4"
3946 "ASB8 RIPK3 RUFY3"
3947 "CACNA1G TMEM33"
3948 "B3GNT3 CD19"
3949 "MICU2 TDRKH ZFYVE19"
3950 "ISLR OAF"
3951 "SGPL1 TUSC5"
3952 "ADAMTS14 RYR1"
3953 "IRF2 NUDT14 XPNPEP1"
3954 "AADAT TNFAIP3"
3955 "PTK7 SCARB1"
3956 "VMP1 WRB"
3957 "MUM1 NSMCE2"
3958 "NELFB NELFCD"
3959 "CCDC174 CHKA GPN3 TTC19 ZFP36L2"
3960 "ELP3 HPS5"
3961 "ADCY2 LRRC3B LRRC6 RIIAD1"
3962 "ENPP3 MDH1B MROH2B"
3963 "AGBL3 DBX2"
3964 "POSTN ROBO2 TMCC2 TMEM92"
3965 "KIF2A TMPRSS3"
3966 "RNF39 SLITRK3"
3967 "C4BPB EMILIN3 ZNF655"
3968 "TRIM35 TRIM44 ZNF624"
3969 "FAM207A PTER SKAP2"
3970 "ADPGK H2AFZ"
3971 "BRD2 PWWP2B"
3972 "NLRP1 NUDCD2 RCBTB1"
3973 "DOPEY1 HIVEP3"
3974 "ADAMTS9 CAGE1 TNNI3 ZNF415"
3975 "H2BFS H3F3C"
3976 "ACTRT1 PNMA3 TTLL6"
3977 "DONSON LSM5 RNF213 SCN2B"
3978 "OPA1 PTPRD"
3979 "CLSTN1 CMTM4 NEK10 SH3GLB1 XPO7"
3980 "SEMA6A WIPF3"
3981 "LRRC20 SZRD1 UBAC1"
3982 "FSD1 MTMR12 UBLCP1"
3983 "GGA1 UBFD1"
3984 "KDELR3 TMEM184B"
3985 "LPAR6 SLC7A3"
3986 "B3GALT2 CLN3"
3987 "ASB9 CKM"
3988 "CLIC3 NKIRAS1 SMC1B"
3989 "RASAL2 TMEM208"
3990 "DIS3L2 FERMT1"
3991 "CHCHD4 MREG"
3992 "CRLF3 ENPP6 MEX3B RIPK4"
3993 "ANKRD30B CCDC178 PIP5K1B"
3994 "HDDC2 TRPM1"
3995 "A2ML1 C17orf105 S100A2"
3996 "CNNM4 GRIP1 PTP4A1"
3997 "DCAF8 DYRK1A FNTA FNTB"
3998 "KMT2B NCOA6"
3999 "COX6B2 PAK3"
4000 "ADCK5 MCF2L RMDN1"
4001 "FNDC3B PLEKHB1 RBFOX2 RBPMS"
4002 "CDNF NFS1"
4003 "ARIH2 HOGA1 LYRM2 LYRM4 LYRM7 MTERF4 OXSM ZFAT"
4004 "ISCA1 MCFD2 PARS2"
4005 "ABI1 ABI2 BAIAP2 CYFIP2 NCKAP1 WASF1 WASF2 WASF3"
4006 "ASAP1 ASAP2 CBL GIT2 NCK1 NCK2 WASL WIPF1"
4007 "ARHGAP35 SYNE1"
4008 "FADD RAB28"
4009 "GALT UBTD2 USP47"
4010 "SLC30A4 SMPDL3B"
4011 "ELP4 MTMR8"
4012 "ARHGAP25 ELP2 KDM5C"
4013 "ELP5 ELP6"
4014 "CD58 CD63 RASD2"
4015 "KCNH7 SPO11"
4016 "DLC1 TCP11"
4017 "MTX2 PHKA2 SAMM50"
4018 "IMMT PKP2"
4019 "AMDHD1 KLHL23"
4020 "PPRC1 PYROXD2"
4021 "KAT6A KLF13"
4022 "PDGFRA TFRC"
4023 "SPAG1 TIMM50"
4024 "DVL3 RAB43 RNF5 SGSM3"
4025 "ACRBP ATL2"
4026 "APOA4 CP FGA SERPINA3"
4027 "A1BG FGA FGB MVP ORM2 SERPINB1"
4028 "APOA1 HP HPX ORM1 SERPINA3"
4029 "CUX1 FBXO38 INA PRRC2C"
4030 "GRM2 PSD2"
4031 "HLA-A HSPA13 ITFG1 TOR1B"
4032 "CLGN FAM213A"
4033 "DNAJC3 ERLEC1 GALNT7 GUSB MGAT1 NAGLU OS9 PAM SEL1L SIAE"
4034 "HLA-B HLA-C"
4035 "TMEM30A TMX4"
4036 "HIST1H1A TUBA8 YBX2 ZNF317"
4037 "CECR2 SMARCA1"
4038 "ATP9A CERS2 CTAG2 KDSR"
4039 "PARP2 RNF146"
4040 "ANKHD1 DCAF8 SFRP4"
4041 "ANGPT4 CAPN11 SCP2D1"
4042 "ALCAM MFGE8 PTPRK QSOX1"
4043 "AKAP10 SDHAF2 UBE2E2 UROC1 USP8"
4044 "INPP1 TATDN1"
4045 "DCAF6 DDX59 MAGEB6 POU2F1"
4046 "FBXL18 MAGEA1 MAGEB3 MAGEB4 PBX3"
4047 "HSPBAP1 MAGEA9B"
4048 "CALR3 CCDC8"
4049 "NEU2 TGM5"
4050 "DUSP6 FAM217B"
4051 "ANKRD40 SUMF2"
4052 "COLEC11 EMILIN3 NELL2"
4053 "GBP4 GSTA3"
4054 "FDFT1 NOVA1 PPARGC1B RADIL"
4055 "CCDC150 NRXN2 SLC3A1 UGT3A1"
4056 "GANC KLHDC10"
4057 "TRIM38 ZFPM1 ZFYVE26"
4058 "RPGRIP1 TRIM15 TRIM31 WDR63"
4059 "PAH PRRC1"
4060 "KRT6B PCDHB15 RCN3 TOMM22"
4061 "CD63 OTUB1"
4062 "CYB5A PTPRG"
4063 "PANK2 RAB28 RPP21"
4064 "GLIPR2 HRAS TLDC1"
4065 "COPZ1 EFR3A"
4066 "FRMD4A RIMS4"
4067 "MAP3K9 UBE2D4 ZC3H6"
4068 "ACBD3 AGTPBP1 DRG2 NT5C2"
4069 "PITPNM1 PPP4R2"
4070 "IGBP1 PPP4C PPP4R1"
4071 "EDRF1 FAM111A PUS7L ZFX"
4072 "ANO3 RGMA"
4073 "C5orf42 NEURL4 RAB43 TDP1 ZBED6"
4074 "EFR3A RAB34"
4075 "CA8 CCDC88A DIAPH1 NRGN PLXNB1"
4076 "FAM118A PDSS1"
4077 "FAM160B1 MAP3K15 MAP3K5 TNFSF13B"
4078 "FCGR3A FCGR3B"
4079 "ARL2 CHP1 FAS MYO1D"
4080 "CD58 SLC4A7"
4081 "GSPT2 SNRPN"
4082 "ATP2A2 CDKAL1"
4083 "ABCD3 PHB PHB2 STOML2 VDAC1 VDAC2 VDAC3"
4084 "RPN2 SACM1L"
4085 "DNAJC10 ELMO3 PARP9 TCIRG1"
4086 "ATP6V1G1 CHMP4B GPRC5A IST1"
4087 "MVB12A TSG101 VPS28 VPS37A VPS37B VPS37C"
4088 "CAPN7 VPS4B"
4089 "ATP6V0A1 ATP6V0D1 ATP6V1A ATP6V1B2 FLOT1 FLOT2 MPZL3 RHOB VPS9D1"
4090 "CHMP1A MITD1 SPAST"
4091 "APAF1 ATR BTAF1 FAM118B ITPK1 NUP37 RABGEF1"
4092 "CHCHD2 CHST8 GAL3ST1 PIGW PSG4"
4093 "ITPRIPL1 TLCD2"
4094 "CCDC57 DISC1 FAM221A NIN ODF2L TRIM37"
4095 "FBXL17 KCTD21"
4096 "DOC2A UBASH3B"
4097 "C19orf60 IPP"
4098 "CHRNB3 TYRO3"
4099 "FLVCR2 NPC2 SBK1"
4100 "MSH5 RAD54L TECPR2"
4101 "DENND4B FIGN PRICKLE3 TBC1D9"
4102 "BST2 FDX1 GPD1L RASAL1"
4103 "SLC25A24 SLC25A4"
4104 "CTPS1 NID2 PFKL SLC1A4"
4105 "AGTR1 CYP2S1 SLC6A8"
4106 "DOCK2 PDZD2 ZBTB47"
4107 "CARS GIMAP4"
4108 "EFR3A MICAL1"
4109 "AIDA DAAM1 TLDC1"
4110 "EPHA3 RNF213"
4111 "HOXB6 HOXB9 HOXC9 MYLK3"
4112 "MAP2K3 MAPK14 MAPKAPK2 MAPKAPK3"
4113 "AMMECR1L CUL7 DUSP16 DUSP7 DUSP9 FBXW8 MKNK2 RNF138"
4114 "RPGRIP1 TRIM15"
4115 "MORN1 ZBBX"
4116 "SHC2 ZFR2"
4117 "CPEB3 GBA2 MKNK1 MYH13 MYLK3"
4118 "ANXA13 APBB1IP TIMM10B"
4119 "FASTK RUSC1"
4120 "CPEB3 SCMH1 TULP3"
4121 "VWDE ZNF589"
4122 "MAP7 PLEKHA5"
4123 "ARNT HIF1A"
4124 "EPN3 MID2 SMURF1 SYT17 UBXN1"
4125 "DNMT3A GPBP1 N6AMT1 ZBTB48"
4126 "MTTP RWDD4"
4127 "B9D2 LAPTM4B SHISA2"
4128 "CSPG5 DLK1 EVA1B PTGES2"
4129 "PTRH2 SLC16A2 TEX29"
4130 "ASB6 EME1 HK2 KRT2 NFKBIE SNUPN TRMT5"
4131 "GRM1 RPH3A"
4132 "GBP3 STMN3"
4133 "CASP14 CD2AP JUP"
4134 "ACTA1 PFKM"
4135 "ADAM10 ITGA6 M6PR"
4136 "CRIPT SPIRE1 TERF2 TERF2IP"
4137 "ACD DCLRE1B FAM102B FAM103A1 KANSL2 POT1 TBC1D8 TERF1 TINF2"
4138 "ITIH6 SH3GLB1"
4139 "NPC2 SBK1 ZFAND2B"
4140 "DNAH7 KCNAB1"
4141 "GBA RNASET2"
4142 "ALDH5A1 CKMT2 DLG2 DLG3 DLG4 SCRN2"
4143 "CCDC42 GPR88"
4144 "RYR1 TBX20 TLE1 ZFAND6 ZNF503"
4145 "CNGA3 KHDRBS2 LIPJ"
4146 "CYB5R3 GNAZ SVIP"
4147 "NCAM1 RAB6B"
4148 "ERP29 NGLY1"
4149 "AGO1 ARFGAP2"
4150 "COL14A1 COL18A1 COL4A2 LAMB1 TGFB1"
4151 "CFAP61 DCAF4L1"
4152 "ECEL1 PCYOX1L"
4153 "B4GALNT2 CCDC153"
4154 "NEUROD1 TCF4"
4155 "ANKRD13A NUDT8"
4156 "OTOA TMC3"
4157 "CCDC154 TEX11 TMEM232"
4158 "NUSAP1 SLC35A1 SUMO2"
4159 "ERC1 PHACTR4 RAB9B RALGAPB"
4160 "PPIP5K1 TMTC2"
4161 "COL5A1 PRSS23 PTPN2"
4162 "C1QB GK TMEM11"
4163 "SLC25A1 TMEM30A"
4164 "ANKRD36 PER3"
4165 "CRY2 SCAI STOX2"
4166 "FKBP1A SOD1"
4167 "ENO2 FABP5 GLRX HINT1 IMPA1 TALDO1 UCHL3"
4168 "MTPN UROD"
4169 "CFAP44 GRIA4 PRICKLE1"
4170 "DZIP1 IQCH WDR78"
4171 "ARRDC1 NEDD4 SLC35G2"
4172 "UBE4A UBXN4"
4173 "CFAP36 IP6K1"
4174 "MNT PREX1"
4175 "B9D2 EVA1B LAPTM4B"
4176 "CSPG5 DLK1 PTGES2"
4177 "GPC4 OXA1L SLC25A13 SLC25A18 SLC25A22"
4178 "ALDH3A2 ILVBL"
4179 "ADAMTS3 SEC31B"
4180 "CCDC39 LRRTM3 TRPM6 USHBP1"
4181 "ATP13A4 CNGA1"
4182 "DNAH3 RPS6KA4"
4183 "DNAJC10 ELMO3"
4184 "ESYT1 RDH11"
4185 "PIP4K2A PIP4K2C"
4186 "LAMB4 PLIN4 TNR"
4187 "COA4 MID1IP1 NUDT16"
4188 "HSD17B14 KLHL17 PIPOX"
4189 "CCDC89 GCK"
4190 "ACTR3B ANKRD12 LRFN4"
4191 "FGD4 NCKIPSD"
4192 "DAPK2 ELOF1 EXO1 KIAA0556 KIF16B MAP3K1 PTAR1 TAF9 ZNF707"
4193 "ATF2 ATP5S LYST"
4194 "PARD6A PARD6B"
4195 "ARID3C FMO6P PRDM9 ZNF804A"
4196 "FRMPD4 KALRN NAV2 RBMS3 SPAG17"
4197 "COL9A2 KIAA2026"
4198 "APTX H2AFZ LIG4 POLB UVRAG"
4199 "CCDC43 PNKP SCML1 TDP1"
4200 "ATP1A2 ATP2B1 LETM1 SLC16A1"
4201 "LARP6 NEIL3"
4202 "SYNM TATDN3"
4203 "MYCBPAP NEK10"
4204 "CORO7-PAM16 DCAF17 FKBP10 MTHFD2 SUPV3L1 ZMAT3"
4205 "RAB40AL RAB40B RAB40C"
4206 "MYD88 SPOP"
4207 "DYNLL2 HIST1H2BK HLTF THAP10"
4208 "PTK2B STEAP3"
4209 "AKR7A2 CNTN5 GPT PCMT1"
4210 "CTSV RNASET2"
4211 "FBXO2 SMPD1"
4212 "ARG2 RBM23 ZNF146"
4213 "ACOT2 DNLZ"
4214 "NR2C2 PATZ1"
4215 "ATP6AP2 EPB41L5 RAP1B"
4216 "ARMCX5 DNAJC12 SHROOM1"
4217 "DPP8 WDR4 WDR46"
4218 "DNAJC17 SOS2"
4219 "HSPA12A HSPA12B"
4220 "EFCAB5 KRT3"
4221 "DRG2 EIF1AX JAKMIP3 NMT1 NT5C2 SBDS TBCB"
4222 "ACBD3 TIPRL"
4223 "ECHDC3 HAAO"
4224 "C11orf68 FRY"
4225 "COPZ1 DNAJB4 NDRG1 NEO1 VPS39"
4226 "FOXC1 FOXC2"
4227 "CFB IGLL5"
4228 "ALPI SIK2 SRGAP1"
4229 "BTBD9 KLHL24"
4230 "CACNA2D4 NLRP11"
4231 "NLRC3 PAX9 SNX13"
4232 "IDI1 NUDCD2 STMN1"
4233 "ARHGAP5 CCDC43"
4234 "AMPD2 BICD2"
4235 "FAM161B KCTD6"
4236 "FUCA2 GAA GGH HEXB SCPEP1"
4237 "GUSB NAGLU PRCP SIAE"
4238 "C6orf118 CCDC154 DRC1 TEX11"
4239 "CA10 PHYHIP"
4240 "GNAT3 GNB4 PBX4"
4241 "MEIS1 MEIS2 MEIS3 PBX1 PBX3 PIGL"
4242 "LMX1B MAB21L1 PKNOX2"
4243 "ADM HLA-DPB1 NMNAT3 PLTP SPACA4 VSTM2A"
4244 "NDRG3 NTMT1"
4245 "ACBD3 DRG2"
4246 "CTRC FREM2 GALNT18"
4247 "CBWD5 IDS SUMF1"
4248 "FBXO21 SIAH1 TCAIM"
4249 "ACAD11 OGT TRAK1 TRAK2"
4250 "ADM HLA-DPB1 HLA-DRB5 NMNAT3 SPACA4 VSTM2A"
4251 "PFKFB4 RNMT"
4252 "LRTM2 ZNF559-ZNF177"
4253 "FMO4 SLC4A3"
4254 "ADAM8 DDX53 DYNLRB2 EBF4 LCA5L SFTPD STARD8"
4255 "WRNIP1 WWOX"
4256 "STAM UBE2S"
4257 "HGS STAM2"
4258 "NSF TPT1"
4259 "ACSL5 GRWD1"
4260 "BARHL1 PTPN5"
4261 "CDC14B KRT28"
4262 "MOB1B WDR44"
4263 "TMEM156 TTLL11 UNC80"
4264 "GUF1 IBA57 LIN7A"
4265 "COQ3 COQ6"
4266 "BPIFA1 BPIFB1 EPX FRS2 OSMR TMEM237"
4267 "CD58 RASD2"
4268 "CD276 KIAA0319L"
4269 "LPIN3 TSPO ZSCAN21"
4270 "DEPDC1 GCH1 IFT88"
4271 "METAP1D TTC31"
4272 "GAB2 GRAP2 TRIM68"
4273 "BAIAP2 KIAA1522"
4274 "FKBP1B FUT10 IPPK"
4275 "CELSR2 PCDH7"
4276 "ATP1A2 CRIP2 S100A10 TIMM13 TIMM8A"
4277 "GPR19 MNS1"
4278 "ARRDC1 MOCOS NXN PBK WDR53"
4279 "GOLGA7B SUN2"
4280 "FH PRDX5"
4281 "AMIGO2 WDPCP"
4282 "ANGPT2 SPOCK3"
4283 "CHRNA2 GRIK5"
4284 "KCNC4 RGS10"
4285 "CYP3A7 NUDT13"
4286 "ALCAM PTPRK RASD2"
4287 "CD58 EGFL8 SLC4A7"
4288 "CDKN2B GUCY2C LRRIQ1 MAZ RBMXL2"
4289 "SUGCT TRIM40"
4290 "EHD4 NAGK S100A8 S100A9"
4291 "ARF6 EHD1"
4292 "CDC25A PRODH"
4293 "ELOVL2 KDELR3"
4294 "ENTPD7 LPAR1"
4295 "ATP5J2 LPAR6 MFSD5 P2RY12 SLC7A3 TMEM164 TTC39A"
4296 "ARL10 HEYL"
4297 "AGTR1 FZD3 GPR52 SIGMAR1 SYNE4 TMEM56"
4298 "ARHGAP40 OVCH1"
4299 "CCDC152 KIF4B"
4300 "BET1 STX17 STX6"
4301 "SCAMP1 STX12 STX7"
4302 "CDO1 GLTP"
4303 "COPE GBA2 GRHL1"
4304 "MKNK1 MYH13"
4305 "CACNA1A CDK14 PRMT6 TFCP2 UBP1"
4306 "ADD3 CALD1"
4307 "TSHZ1 ZNF766"
4308 "AIFM3 GRIN2C PRSS27"
4309 "DNAL1 HIRIP3"
4310 "AUTS2 FBRS GPATCH2L HAGHL MORC4 PCGF3 PCGF5 RAD52 RNF111 RYBP"
4311 "ARMC1 WNT10B"
4312 "CDC42EP1 ISCA2"
4313 "ANKRD9 IMPDH2 JAK1"
4314 "FAM206A PUS10 TIAM1"
4315 "ANP32A CHD6 DPH6 FLT1 KDM5D"
4316 "HCN2 NDUFA1 NDUFB7 NDUFC2"
4317 "CLPTM1 EMC2 SEC63"
4318 "NDST1 NPTX1 SMYD5 WRN XRCC5"
4319 "BRPF1 GATC"
4320 "ASAP3 MAP3K6 MIB2 NCOA3"
4321 "ABHD10 KCMF1"
4322 "ATPIF1 TECR"
4323 "MTDH RPL13"
4324 "EEF1G VARS"
4325 "COX4I1 COX5A CYC1"
4326 "UQCRB UQCRH"
4327 "ATP5D ATP5F1 ATP5I ATP5J ATP5L MT-ATP8"
4328 "ATP5H ATP5O UQCRC2"
4329 "ATP5A1 ATP5B ATP5C1 SLC25A3"
4330 "COX5B COX6B1 COX6C UQCRC1 UQCRFS1"
4331 "FRMD4B NOVA1 PCLO RADIL"
4332 "AJUBA TRIP6"
4333 "COPS8 NUCKS1 STUB1"
4334 "ACBD3 DRG2 NT5C2"
4335 "DACH2 SCNN1A"
4336 "GRIPAP1 RABEP1"
4337 "ABHD12B GNAT2 PDE4A TMEM222"
4338 "TRPT1 ZNF330"
4339 "DND1 PAIP2B"
4340 "GJA1 SURF4"
4341 "CHST4 DDX43 HES6"
4342 "CNGB1 EVC2 NLRP3 RSPH4A TDRD6"
4343 "ACOX3 KIAA1217 VASP"
4344 "ARHGEF18 CDKL5 FBXO22"
4345 "ADAM19 CPA2"
4346 "GGCT LGALS1 LPP"
4347 "SERPINB9 SUCLG1"
4348 "NTHL1 POLRMT"
4349 "ALG1 GLT8D1 NAAA PIGN"
4350 "CEPT1 CHCHD4 NARF"
4351 "ADM CLPSL1 HLA-DPB1 NMNAT3 SPACA4 VSTM2A"
4352 "BEND7 PCDHGA12 RFPL4A SALL1"
4353 "ZNF296 ZNF423"
4354 "FAM9A MAGEB6 NAP1L2 NAP1L3 ZNF93"
4355 "ABCD2 GLB1L MPV17L2 OSBPL10"
4356 "COIL DDX20 GEMIN2 GEMIN4 GEMIN6 GEMIN7 GEMIN8 KLHL8 LSM10 LSM11 SLC7A6OS SNRPB"
4357 "TNFRSF9 TNFSF9"
4358 "A4GNT JMJD8"
4359 "KIF26B RAD9B"
4360 "C1orf186 WDR47"
4361 "CCDC172 KRT76"
4362 "RAPGEF4 SYK VMP1 YTHDF2"
4363 "MRPL20 PCDHB10 POU4F3 TMEM92 ZNF747 ZNF783"
4364 "EFNB3 HLA-DPA1 HOXD13 HS3ST3A1 KLRG2 NMU"
4365 "CEACAM21 GAL PCDH9 VSIG4"
4366 "CASQ2 CCDC8"
4367 "GNA12 GNAL"
4368 "ERMP1 REEP5"
4369 "APAF1 ATR BTAF1 DIAPH3 DYM LYRM4 NUP37 RABGEF1 TPK1"
4370 "DNAJB7 SLC26A9"
4371 "AK8 ARHGAP6 TTBK1"
4372 "IQSEC3 SPTBN5"
4373 "MTHFR PCBP2 PDZD2 SAV1"
4374 "RASSF1 RASSF2 STK3 STK4"
4375 "APC2 FAM135A FAM135B PTPRZ1 SLC1A3"
4376 "AP3B1 AP3B2 AP3D1 AP3M2 AP3S1 AP3S2 PTPRA"
4377 "BCAS4 BIRC6 BLOC1S1 BLOC1S2 BLOC1S3 BLOC1S4 BLOC1S5 BLOC1S6 C9orf16 DISC1 DTNBP1 KXD1 NAV1 SNAPIN SYBU TRIM37 TXLNB"
4378 "AGO3 ANKMY2"
4379 "CNTN3 SLC9A2"
4380 "KCNC4 NUDT13"
4381 "FAM20B GP1BB NOMO1 PVR SUN1"
4382 "ADAM17 PTK7"
4383 "CPEB3 KIF17 MIEF1 SCMH1 TULP3"
4384 "DPH3 HOXD3"
4385 "C12orf75 CCR1"
4386 "GNB5 RGS7"
4387 "ATP8B4 EXD3"
4388 "CASP1 CDK7 GAB1"
4389 "RABL2B RASEF"
4390 "CPD NNT SEC22B TMX1"
4391 "HBD LMAN1"
4392 "BANF1 DPY30 KHDRBS3 RALBP1 REPS2"
4393 "BRCA1 HDAC1 KIF4A SHCBP1"
4394 "NCAPD2 NCAPD3 NCAPG NCAPG2 NCAPH NCAPH2 SMC2 SMC4"
4395 "ANKDD1B UTF1"
4396 "CCDC170 MAB21L2 SULT1E1 TDRD1"
4397 "CNGA2 SCNN1B TFEC"
4398 "EFHC2 SLC25A27"
4399 "HMOX1 MAN1A2"
4400 "CISD3 GLRX5 NLN"
4401 "ADO IRAK4 SDC4"
4402 "IVL KLK10 SULT2B1"
4403 "ALOX12B ASPRV1 B3GALNT1 CAPNS2 CIDEA CPA4 CST1 CST2 DPPA4 FLG2 GLIPR1 GSDMA HAL IL36G KIR3DS1 KLK7 LOR NCCRP1 PKP1 PLCZ1 PLK2 RNASE7 SDR9C7 SERPINA12 SERPINB13 SERPINB4 SERPINB7 TGM1 TGM3"
4404 "ELMOD3 FLG KLK5 TGM5"
4405 "ASH1L ASH2L CHN1 MEN1 NCOA6 PRICKLE2 ZNF354B ZNF646"
4406 "CAND1 CUL4A CUL5 MAPK15 NUCKS1 RBX1 STUB1 TNFRSF6B TRIM49 UROS WISP2"
4407 "COPS2 COPS3 COPS4 COPS5 COPS6 COPS7A COPS7B COPS8 CUL2 CUL3 DCAF11 DDB1 ERCC8 GPS1"
4408 "CPEB3 CUL1 FBXO17 NEDD8"
4409 "CCS CUL4B DDB2"
4410 "RAB3GAP1 SARS SIRT2"
4411 "BOLA1 RAB17"
4412 "CNRIP1 NRCAM"
4413 "GRTP1 OSTM1 R3HDM2 RNF13 STAT5A"
4414 "ENPP4 MCAM"
4415 "MAGI3 TCL1B"
4416 "FLCN LDLRAD4 SMURF1 SMURF2"
4417 "ACVR2B FLT4 HEPACAM2 PTGER3 RELT"
4418 "FKBP14 TYSND1"
4419 "ARHGEF6 CNTLN ODF2"
4420 "CCNY NWD2 RALA RAP1A STXBP3"
4421 "ATP2B1 RCN1 SLC16A1 VWA1"
4422 "CPPED1 DTYMK FKBP2"
4423 "MBD6 ZNF3"
4424 "ASXL2 BAP1 KDM1B MBD5"
4425 "CYR61 KIF26A SS18L2"
4426 "AKIRIN2 FNBP4"
4427 "CCDC151 CCDC166 CFAP70 NEURL1"
4428 "ALAS2 CNBP DGKG NFASC PRUNE2 RNF133 SFTPA2"
4429 "CYCS HCCS"
4430 "GBP5 SMOX"
4431 "ADHFE1 DMGDH"
4432 "ADA ADSSL1 NPEPPS"
4433 "NOS3 POLR2G"
4434 "ADAM28 STAR"
4435 "FAM213A KCTD15"
4436 "GCAT MPC1"
4437 "NSUN4 TEFM TFB1M"
4438 "AGA CC2D2A"
4439 "GNAS PRKCA PYGB"
4440 "LRRN2 SOWAHD"
4441 "ABCA1 ARAP3 CNTN3"
4442 "MYH10 SLC25A41"
4443 "CCDC91 MVK"
4444 "CD274 UTP20"
4445 "GPR19 MNS1 WBP2"
4446 "AKT3 ARHGAP17 GORASP2 MRI1"
4447 "ACADM ACTN2 ATP6V1F"
4448 "GLRX2 ISCU TACO1"
4449 "BCL2L11 RHPN2"
4450 "BTN2A2 C1orf43 CHRNA9 DNAJC18 HS6ST1 TMEM39B ZIC2"
4451 "DOCK4 ZNF398"
4452 "FMO4 LRTM2 SLC4A3"
4453 "HTT KRBA1 RASD1"
4454 "L3MBTL3 PRMT2 SETD5 USP51"
4455 "HPS1 SALL2 ZBTB10"
4456 "LONRF3 SIMC1 ZNF195 ZNF302 ZNF784"
4457 "ACTN3 AP5Z1 GABPA TBCK"
4458 "C12orf4 CRYZL1 PPP1R21"
4459 "TPRKB ZFAND5"
4460 "SERF2 ZNF706"
4461 "C3orf38 TOR2A"
4462 "CTBP1 ZBTB18 ZNF516"
4463 "INPP5A PBDC1"
4464 "FKBP10 MINOS1 SUPV3L1"
4465 "MPC2 MRPS16"
4466 "C12orf57 DNPEP PIR PLCD1 RAB11FIP5 TNXB"
4467 "IL16 KIF16B"
4468 "NHP2 STAG3"
4469 "ARNTL ATP2A1 ZBTB16"
4470 "ATG9A CD276 CD58 KIAA0319L RASD2 SLC38A2 SLC4A7 SPPL2A"
4471 "DNALI1 KY TRIM55"
4472 "MYO1H VNN2"
4473 "DNAH9 ZNF99"
4474 "MARK1 PSAP SPARC UBE2B"
4475 "CASP14 CSTA DSP JUP"
4476 "CBWD1 IRAK1"
4477 "PNMA6A UTP6 WDFY2"
4478 "BCL2L2 FUOM OTOF"
4479 "KIF5A OTUB2"
4480 "KIF5C SPTBN4"
4481 "CLSPN GINS3 TIMELESS TIPIN"
4482 "GINS1 GINS2 GINS4"
4483 "NOV RELA"
4484 "NEUROG2 RBM46"
4485 "CNTNAP5 NPHS1"
4486 "POLI TULP4"
4487 "CDH22 LCT"
4488 "BOD1L2 NYNRIN"
4489 "BAG4 BOD1"
4490 "MSRB2 MT2A PRELID1 TRIAP1"
4491 "MYH14 MYL9 TMOD2"
4492 "MYH14 MYL9 PLEC TMOD2"
4493 "ACBD3 DAAM2 DRG2 EDF1 NT5C2 SBDS TOM1"
4494 "CCDC121 LTBR SPATS2L"
4495 "MAGEB18 PRDM16 PRMT8 SPDEF SUCNR1 TIGD7"
4496 "C1orf43 PPP1R15B"
4497 "GGCT KIF13B LGALS1 LPP PPM1F RAB4A SERPINB9"
4498 "GOT2 HIBADH"
4499 "REG3A THNSL2"
4500 "GRIN3A LUZP2"
4501 "CCDC60 KIF18B KRT6B MECP2 NEIL3 SEC14L5 SMARCA2 SMARCA4 TBL1XR1 U2AF1L4 WDR88"
4502 "ARID1A ARID1B ARID2 BCL7A BCL7B BCL7C BRD7 DPF1 DPF3 PBRM1 SMARCD1 SMARCD2 SMARCE1 SS18L1"
4503 "CACNA1A CLNS1A SCD SNRPD3"
4504 "DPF2 GATAD2B SMARCB1 SMARCC1 SMARCC2 SMARCD3 TOP2B"
4505 "PRMT5 WDR77"
4506 "MLF2 NPC2"
4507 "SEMG1 SEMG2"
4508 "GOT2 HIBADH PPIF SERPINB9"
4509 "AMBRA1 DNAJB12 ETV3 KRBA1 MARCH7 POLR2J"
4510 "BBS1 BBS2 C21orf2 CXorf57 EXPH5 IFT172 JMJD4 KLHDC3 KSR1 LONRF3 MCM8 MYO9A NEK1 NPHP4 PER1 POLR2L SENP5 SETD5 SIMC1 SKAP1 STK32C TIGD5 TMEM160 TRMT44 UNC119 ZMYM6 ZNF195 ZNF302 ZNF324 ZNF784"
4511 "C15orf39 L3MBTL3 PRMT2 RIC8B TRAPPC2 USP51"
4512 "CHN2 DENND5B"
4513 "CEP44 IFT80 POC1B TET3"
4514 "ACO2 ECH1 ETFB HSD17B4 HSPE1 PPIF SUCLG1"
4515 "ECHS1 ETFA GOT2 MDH2 OXCT1 SUCLG2"
4516 "RANBP17 TBC1D10C TBC1D2 TRIM35"
4517 "ASB8 FAM193B TRIM11"
4518 "TRIM44 ZNF624"
4519 "CEP19 CEP41 FGFR1OP MSL3 NEIL3"
4520 "FANCG KANSL1 KANSL3 KAT8 MSL1 R3HDM1"
4521 "CTSV EVPL PRKCB SERPINB2 ZBTB41"
4522 "REL SCYL1 ZSCAN31"
4523 "ETNK2 KCNH2"
4524 "FYN GDE1"
4525 "PALM RAP2A"
4526 "GLIPR2 GNA11 HRAS TLDC1"
4527 "TRPM6 USHBP1"
4528 "CLEC4A GBP7 SLC15A2 TEX11 TMEM232"
4529 "ENPP2 TPPP2"
4530 "PCSK1N SRGN"
4531 "RPS6KL1 RYR3"
4532 "LIPF LRSAM1 ROS1 SLC3A1 TCN2 TRPC6"
4533 "MARCKSL1 RPL39 TPD52L2"
4534 "PURB SGSM1"
4535 "ARHGAP27 SEC14L1"
4536 "DOPEY2 TDRD5 UGT2B10"
4537 "CUX2 FRRS1"
4538 "LRBA RIC3 TAPT1"
4539 "TRIP11 VWA5A"
4540 "ANKS1B ARID1A BOD1L1"
4541 "IER2 MDM2 PBX1 PITX2 ZBTB40"
4542 "KIRREL MAP7D3 QSOX1 SPINT2"
4543 "CCPG1 FADS1 MBTPS2 UBB"
4544 "FAM168A FBXO6"
4545 "FSCB GJB3"
4546 "BCOR BMI1 CBX2 CBX4 CBX7 CBX8 FBRS KDM2B MORC4 PCGF1 PHC1 PHC2 PHC3 RING1 RYBP SCML2"
4547 "ALK BOC"
4548 "GPR84 LAPTM4B PEX11B TMEM68"
4549 "ASPHD2 ELOVL4 GALNT10 GDPD5 LMBR1 LYPD3 PHTF1 PHTF2 REEP1 SLC41A1"
4550 "BTN3A1 BTN3A2 TMEM245"
4551 "CSNK1D DDX49 PDCD2L"
4552 "GPAT2 ZNF684"
4553 "ACTL6B FBXO34 FOXR1 FOXR2 MORF4L1 MRFAP1L1 PLAC1 SIM2 TRRAP"
4554 "FOXP4 MEF2C MTRF1 NFYA NFYB NFYC UHRF2"
4555 "NDRG2 PSAP SPARC UBE2B"
4556 "EIF5A HYOU1 STAT1 TUBB1 TUBB3"
4557 "CCT2 CCT3 CCT4 CCT5 CCT6A CCT6B CCT7 CCT8 ESYT1 TCP1 TXNDC9 VCP"
4558 "TUBB4A TUBB6"
4559 "EIF4A1 PPME1 PPP2CA PPP2R1A PPP2R1B"
4560 "TUBA1A TUBA4A TUBB TUBB4B"
4561 "TUBA3E TUBB2B"
4562 "CHST15 PLEKHG1"
4563 "COX16 CTU2 FADD FBXL12"
4564 "CYP2C19 FBXO17 SIAH1 SLC10A3"
4565 "CACYBP FBXL15 FBXL16 FBXL18 FBXL8 FBXO31 FBXO45 FBXO9 FBXW5 FBXW9 KDM2B KPNA2 SKP1 SPRYD3 TLN2"
4566 "BTRC CDC25B FBXO21 FBXW11 RHPN2 TCAIM"
4567 "FBXW2 PANX1"
4568 "C11orf68 EXO1 FGF10 MYEF2 PRPF40B"
4569 "CLVS2 LIPN"
4570 "CCDC25 HMGN5 NISCH"
4571 "DHPS FTO PDE6D PLS1 SPAG7 ZPR1"
4572 "ARPIN MEF2D OR5F1 RANBP3 RWDD2B TAS2R41"
4573 "CCDC102A TTC21A"
4574 "AK8 ARHGAP6 PRSS16 TTBK1"
4575 "CSPG4 FBLN1 LRP1"
4576 "BBS2 SBNO2 TSC22D3"
4577 "DDR2 SFT2D2"
4578 "C11orf65 DLL4"
4579 "PACRG TNNT3"
4580 "EIF5AL1 LRRN2"
4581 "GTF2H2C PHKA2"
4582 "MAPKAPK3 TRIP10"
4583 "COQ7 HARS2 MRPL54"
4584 "TGFBRAP1 VPS11 VPS16 VPS18 VPS33A VPS39"
4585 "UBE2Z VPS41 VPS8"
4586 "CALCOCO1 CDC42EP1 ISCA2 SETD7 THNSL1"
4587 "FGL2 SPATA2 ZNF282"
4588 "DCTD PGM1 RAC2"
4589 "ESD GRHPR"
4590 "CANX TMX1"
4591 "GRK5 TMEM132C"
4592 "BCL9 FAM35A FNBP1L REV3L STMN3 USP42"
4593 "CNP RAB8A"
4594 "RAB10 RAB14 RAB1A RAB1B RAB2A RAB5B RAB5C RAB7A"
4595 "RAB13 RAB35"
4596 "HELQ HSF1 HSF2 LMLN"
4597 "PLBD2 TC2N"
4598 "CLYBL MFSD10 SPARC SSBP1 WDFY1"
4599 "GRK4 UNC13A"
4600 "ACBD3 AGTPBP1 DRG2 NT5C2 PHACTR2 PPP4R2"
4601 "IGBP1 PPP4C"
4602 "ADAM11 ADAMTS2 BMP7 BMP8B CA11 CHSY3 ECT2L HAPLN3 PCSK5 SUSD4 VWDE ZNF589"
4603 "BTD CD109 ECE1 FSTL1"
4604 "BIN2 MTHFR"
4605 "ABL1 DENND1B"
4606 "CYP4V2 HS3ST4"
4607 "GTF2H1 PRR12 SOX15"
4608 "MMADHC TLE1 TRAF3IP2"
4609 "FAM172A FGL1"
4610 "KLF13 LCMT2 NAA30"
4611 "ACO2 ECH1 ETFB HSPE1 ME2 TST"
4612 "ECHS1 ETFA GOT2 MDH2 OXCT1"
4613 "HGFAC MON2"
4614 "DAZAP2 FNDC3B MAGED1 PLEKHB1 RBFOX2 RBPMS"
4615 "MGP PELI3"
4616 "BRD1 HIST2H2BF PHIP ZNF280C ZNF782"
4617 "DCAF13 DDX27"
4618 "ATRX CBX1 CHD1 DAXX IWS1 NIPBL ORC1 PHC2 RPS19BP1 RSF1 TFDP1 UBQLN4 VRK3"
4619 "BAZ1B CENPV KMT2A RAI1 SDC2 SMCHD1 ZMYM2"
4620 "DPH6 FLT1"
4621 "C19orf54 ETNPPL"
4622 "MOB2 NUDT1 PTK2"
4623 "ESRP2 URM1"
4624 "REXO2 TAX1BP3"
4625 "ACAP3 MTMR10"
4626 "ADD2 HMGN1 NME6 TRPV5"
4627 "SPIRE1 USP6NL"
4628 "COLEC12 CTSB"
4629 "AURKB FIGNL1 GATB PPT2 RPP30"
4630 "RACGAP1 SHCBP1"
4631 "COL5A2 TGM2"
4632 "FUCA2 GAA HEXB IGFBP2 SCPEP1"
4633 "IP6K1 UBXN4 ZMIZ1"
4634 "SIRT3 TNRC6C"
4635 "DNAH3 HK3"
4636 "GRIN1 LMBR1L"
4637 "CANT1 COX16 FAM210A SFXN2 SLC25A15"
4638 "COX15 ICMT MTFP1 NDUFA3 ROMO1 SCO1 SFXN4 SLC25A19 SLC25A46 TIMMDC1 TMEM223 YME1L1"
4639 "DNAJC19 EARS2 FAS FASTKD1 GCAT METTL15 MT-CO1 MTX3 PARL PISD RARS2 SFXN5 SLC27A2 SLC33A1 SPG7 TFB2M TMEM126B TMEM177 TRMT11 UQCC3"
4640 "ACAD10 AGPAT5 LPCAT4 LPGAT1 SLC25A40"
4641 "AASS ABCB6 ABCB8 AGPAT2 AGPAT3 APOOL BCKDK BDH1 C14orf2 C16orf58 C19orf70 COQ5 ECHDC1 IDH3G L2HGDH MTPAP NUBPL PTDSS2 PXMP2 RNF170 SLC30A9 TM7SF2 TMEM70"
4642 "FDXR FOXRED1 PPOX PTPMT1"
4643 "CTRC FREM2 GALNT18 SUMF1"
4644 "FKBP14 IDS ST3GAL4"
4645 "OR5F1 RGPD2"
4646 "MMP3 SIGLEC9"
4647 "A4GALT ADORA3 CYB5D2"
4648 "MYH7B PKIG"
4649 "BUB1 BUB1B BUB3 CDC20"
4650 "ANKRD9 IMPDH2 XDH"
4651 "CRY2 SLC6A9"
4652 "STOX2 WDR90"
4653 "CCDC66 HSPBP1 NT5C2 PFDN5"
4654 "ABCA1 ARAP3 EFHC1 MYH10 SLC25A41"
4655 "EGLN2 GKAP1 KIRREL2 VHL ZNF518A"
4656 "LYSMD2 TCEANC2"
4657 "APOF HAO1 TUBB2A"
4658 "HBE1 TMEM30B"
4659 "CFAP58 EPB41L4B TAF10"
4660 "HSPA8 KIF14 POTEE RCN2 TUBB1 TUBB4B"
4661 "ACLY CCT2 CCT3 CCT4 CCT5 CCT6A CCT6B CCT7 CCT8 ESYT1 TCP1 TXNDC9"
4662 "EIF4A1 PPP2CA PPP2R1A"
4663 "TUBA1C TUBA4A TUBB6"
4664 "TUBA1A TUBB TUBB4A"
4665 "CALR TUBB2B VCP"
4666 "ACAA2 AKR7A3 AKR7L ANGPTL2 EIF2A MDH2"
4667 "SUCLG1 SUCLG2"
4668 "SUCLA2 UBXN6"
4669 "ATPIF1 COX6B1 DHRS4 UQCRFS1"
4670 "ACADSB PC PTDSS1 SLC25A22"
4671 "GDI2 RAB1B RAB2A"
4672 "RAB1A RAB5B RAB5C RAB8A"
4673 "RAB10 RAB14 RAB7A"
4674 "DNAJC10 ELMO3 TCIRG1 TEC"
4675 "ADAL EIF4EBP2 GGA1 NDRG3 PIK3CD PPM1H PSTPIP1"
4676 "GRK5 OPHN1"
4677 "HSF1 QRSL1"
4678 "HSF2 TTBK2"
4679 "DUS3L PUS7 RNGTT SMG9"
4680 "EHD2 NAA16"
4681 "HSPB1 PLXDC2 TYMP"
4682 "APOPT1 OBSCN PCDHA6"
4683 "BBS7 BBS9 DSCC1 TIAM1"
4684 "ABAT DNM3 NCDN"
4685 "ACBD7 CTH RFK"
4686 "RFX4 SCN2A"
4687 "BCAR1 SAMD9 SHOC2 UBE2A UBE2L3 VIPAS39"
4688 "LANCL2 LIN7A"
4689 "ANO6 ASB4 C4orf48 C8orf58 CDC7 EPHB2 FAM43A FRMD8 HSPA8 LFNG NME3 PLA1A POTEE RBPMS2 TUBB1 TUBB4B TUBB6 TUBB8"
4690 "ACLY CCT2 CCT3 CCT4 CCT5 CCT6A CCT6B CCT7 CCT8 TCP1 TXNDC9"
4691 "TUBA4A TUBB2A TUBB3 TUBB4A"
4692 "EIF4A1 PPP2CA PPP2R1A PPP2R1B"
4693 "TUBA1A TUBB"
4694 "JOSD1 SLC25A36 SLC5A6 SLC7A6"
4695 "SLC7A2 TMPRSS11F"
4696 "IMMP1L KLHL2 RDH12 SC5D TMEM248 TSPAN5 ZDHHC21 ZDHHC6"
4697 "AGPAT4 ALG8 CCDC126 DAGLA FAM210B"
4698 "NAT8L PDZD4 SNX25 TVP23C WDR41"
4699 "ADD3 ANKRD29 DHDDS FOLH1 FOXP4 PPFIA2 TFCP2 UBP1 UHRF2"
4700 "ACTBL2 CDKL4 POTEI"
4701 "C9orf16 IFFO1 TERF2 TERF2IP THAP8"
4702 "WRN XRCC6"
4703 "ACD DCLRE1B KANSL2 POT1 TERF1 TINF2"
4704 "IFFO2 LIG4 PNKP XRCC4"
4705 "DDT DPYSL2 FAM49B"
4706 "LAMTOR1 LAMTOR3"
4707 "BTD CD109 ECE1 FAT4"
4708 "CHST4 DDX43 EVC2 NLRP3 RSPH4A TDRD6"
4709 "BICD1 DCUN1D5 DUS1L ORC6"
4710 "AAGAB FAM177A1 FAM204A OSTM1 ZBTB8OS"
4711 "DLL4 SNTG1"
4712 "A1CF ASXL1 CKAP2 SH2D2A ZNF200"
4713 "AGAP3 HMBOX1 MEMO1"
4714 "CDC37L1 FAM118B"
4715 "CADM4 EXD2 RHOT1"
4716 "ABHD12 COMTD1 COX15 EXOG GLCE GNPAT HIGD2A MARC2 MOSPD2 MUL1 NAT14 PDCD4 PEX19 PEX3 PHKA1 PXMP2 QPCTL SCO1"
4717 "ATP8A2 DNAH6"
4718 "ASF1B IFIH1 MICALL2 NFATC2IP NFYC"
4719 "BRPF1 C1orf131 GATC TBC1D22B"
4720 "NCLN OSBPL8"
4721 "HMOX2 POR SEC63"
4722 "CLPTM1 EMC2"
4723 "OR5F1 SPAG16"
4724 "ANKRD39 GAK USO1 WNK1"
4725 "EPN1 REPS1"
4726 "BTBD3 CRTC2 CRTC3 DNMBP FCHO2 GTSE1 HIP1 PUS7L STAMBPL1 TNK1 TNK2 TROAP"
4727 "DENND1A NECAP1 OCRL SCYL2"
4728 "FAM83B FAM83H PKP3 WIPF2"
4729 "ABCA5 POU1F1"
4730 "C14orf80 OGT TRAK1 TRAK2"
4731 "ALDH1A2 ERP29 MGP SQSTM1 UBQLN1"
4732 "RAD23B UBQLN2"
4733 "CPNE5 LAMB3"
4734 "GMPPB GSTT2B"
4735 "CNNM3 GOLM1 ITIH3 QSOX2"
4736 "KDELC1 SCARF2 SPINT2"
4737 "ACTN3 ALPI GABPA SRGAP1 ZNF337"
4738 "CDK8 MTBP"
4739 "SSR3 SSR4"
4740 "CCDC81 LRRC7"
4741 "C6orf203 LGMN NAA35 PPIP5K2 SSU72 TRIO"
4742 "CEP44 POC1B"
4743 "AKIP1 POC1A"
4744 "DUOX2 OR6F1"
4745 "HDAC9 VEPH1"
4746 "DLL4 OR1L1"
4747 "LRP1 RNH1"
4748 "NEIL2 NRDE2"
4749 "IP6K3 PRSS3"
4750 "BAG6 CD99L2 TCOF1 UBL4A"
4751 "ASNA1 ATXN10 GET4"
4752 "C4A CSPG4 ENPP4 MCAM"
4753 "ITGA5 ITGB1"
4754 "CRHBP ERP29 MGP SQSTM1 UBQLN1"
4755 "AKR1E2 SFTPA1"
4756 "GANAB PRKCSH"
4757 "ATE1 DUS1L PUS3"
4758 "ACTR3B ANKRD12 LRFN4 TBPL1"
4759 "MAP3K2 MAP3K3 TRAF7"
4760 "EIF5A HYOU1 POTEE RCN2 STAT1 TUBB1 TUBB3 TUBB4A TUBB6"
4761 "CCT2 CCT3 CCT4 CCT5 CCT6A CCT6B CCT7 CCT8 ESYT1 PDCL PPP2R1A TCP1 TXNDC9 VCP"
4762 "CFLAR PDXDC1 PLEKHB2"
4763 "ARHGDIA F2"
4764 "ASB7 C8orf34 PTPDC1"
4765 "FAM89A SLC16A6"
4766 "CEP78 DBR1 MPLKIP TNFAIP8"
4767 "C21orf2 CTC1 FRMD6 KCTD17 KCTD5 PCBP3 POLK PTPN4"
4768 "IL36A TEX33"
4769 "AKR1C4 BHMT2 CARM1 KIAA1191 POU2AF1"
4770 "FN1 TF"
4771 "NEK10 NWD2 TDO2"
4772 "APEX2 FAM13A RBBP5 SIVA1 TRPC4AP UTY"
4773 "ALS2 ANKRD49"
4774 "AP2A2 AP2S1 MIS18BP1 REPS2"
4775 "ANKRD12 DIS3L2 NUDCD1 RNF214"
4776 "CMYA5 FBXL14 FES"
4777 "CUTC PCBD1"
4778 "ABI1 ASAP1 ASAP2 GIT2 NCK1 NCK2 TNK2 WASF3 WASL WIPF1"
4779 "CD96 IL17RA MICA TSHR"
4780 "FAT1 FBN2 FRAS1"
4781 "GGNBP2 NT5DC2 ZFP41"
4782 "C2orf74 CSRNP1"
4783 "DNASE1L1 SLC25A1 SPCS3 TMEM30A"
4784 "SEC11A SLC12A2 SPCS1 SPCS2 TMX4"
4785 "ELK1 TERF2"
4786 "PARP1 RAD50 SF3B3"
4787 "LIG4 PRKDC TERF2IP TP53BP1 WRN XRCC4 XRCC5 XRCC6"
4788 "ACD BRWD3 DCLRE1B KANSL2 POT1 TERF1 TINF2"
4789 "CACNA1H WDR88"
4790 "CDC6 FBXW7"
4791 "ARHGAP35 BEST1 CACNA1B CACNA1E CST7 DMD EHBP1 LDB3 SLC9A3R2 SMG1 SYNE1 TENM4 TROVE2"
4792 "ABI1 ASAP1 ASAP2 GIT2 NCK1 NCK2 WASF3 WASL WIPF1"
4793 "GNAI3 GNB1 GNB2"
4794 "CEBPG PXK"
4795 "RAPGEF2 TSSC1 VPS54"
4796 "BMPR1A FLCN NDFIP1 PTPRJ"
4797 "ADIPOR1 CDC6 LRP10 TGFBR2"
4798 "ACVR2A FGFR1 KIAA1549 MFAP3 SLC15A4"
4799 "IFNGR1 NDFIP2 RNF149 SLC20A1 SNX11 TMEM59 TNFRSF10B"
4800 "LDLRAD4 NEDD4 SMURF2"
4801 "CCDC157 DRC7"
4802 "COA4 COX19 LCN1 MTX1 RBM38"
4803 "ACOT13 BCS1L FAM136A"
4804 "DZIP1L GAB3"
4805 "ABCA1 ARAP3 MYH10 SLC25A41 TTYH2"
4806 "ABCG4 CPZ"
4807 "FEZ2 HEATR5A SNX16 ZNF559-ZNF177"
4808 "MLLT10 SCAI"
4809 "CBWD1 CD48 IRAK1"
4810 "BRDT CROT KLHDC4 USP25 WDFY2"
4811 "ACTBL2 CDKL4 SRD5A1"
4812 "FLT1 KDM5D UBE2H"
4813 "ACTBL2 CDKL4 HTR1E"
4814 "ALDOA GRB2 PGAM1"
4815 "ALDOC ATP6V1E1 MAPK1"
4816 "ACTBL2 CDKL4 VASH1"
4817 "ALDH8A1 CHDH MSRA"
4818 "AKR1C2 COX17"
4819 "GOLM1 ITIH3 PIP4K2B QSOX2"
4820 "ERP29 GOLGA6B MGP SQSTM1 UBQLN1"
4821 "IL36A RSPH9"
4822 "AVEN C12orf43 CHTF18 ERCC3 IBTK LIG1 PNO1 RFC1 TSPYL1"
4823 "DDX24 DDX55 FAM111A NOL6 TSR3 USP36 WDR55 ZC3H7A"
4824 "CHTF8 DSCC1 ESPL1 RFC2 RFC3 RFC4 RFC5"
4825 "POP7 RPP25L RPP38 WDR74"
4826 "C18orf21 POP5 RPP14 RPP25 RPP40"
4827 "DDX47 GNL3L IGHMBP2"
4828 "ATAD5 DHX33 IMP4 NTHL1 NVL"
4829 "BRD1 UTP23"
4830 "SGCD SLC12A2"
4831 "TICAM2 TMED1 TMED2 TMED3 TMED5 TMED7"
4832 "ASPH TM9SF2 TMED10 TMED4 TMED9"
4833 "GALNT2 GOLM1 ITIH3 QSOX2"
4834 "ARHGAP20 PSTK"
4835 "CC2D2A CFAP221 FMO1 PCDHB4"
4836 "CCDC92 KCNA3 UCHL5 WNT3A"
4837 "ALDOA PDLIM7 PGAM1"
4838 "CORO2A FARP1 SDHAF2 THAP4 UBE2E2"
4839 "GABBR1 SAV1"
4840 "AMOT CHMP2B DLGAP5 NUP98 PIM2"
4841 "CALR3 DUSP6 FAM217B"
4842 "ICK TIMM10B YARS2"
4843 "ARNTL CHCHD10"
4844 "CFTR IL36A"
4845 "CASP3 MFSD10 SPARC"
4846 "MYH7 SSBP1"
4847 "MAP2K2 NNT SEC22B"
4848 "LMCD1 RAB11B SNTA1"
4849 "ACTBL2 C11orf70 CDKL4"
4850 "CPB2 LXN"
4851 "ARHGEF40 IKBIP TOX3"
4852 "CYLD SLC6A4"
4853 "ANKS1B NAE1 PFKFB4 UBA3"
4854 "ACTBL2 CDKL4 EXD1"
4855 "MAGI2 RHBDL1 TTBK1"
4856 "BCHE LAMB1 SCARB2"
4857 "COL14A1 COL18A1"
4858 "ACTBL2 CDKL4 MYL10"
4859 "FARP2 FUT8 SMPD2"
4860 "FAM117B TROAP"
4861 "DCUN1D2 NPC2 SBK1"
4862 "ABHD14B ARSB ATRN CPNE1 ERAP1 GALNS PROS1 SORL1 TMEM132A TPP1"
4863 "ARSA CLN5 EDEM3 GRN KDELC1 MAN2B1 MANBA OS9 PAM POGLUT1 SDF2 SGSH SIAE SIL1 TXNDC16 UGGT2"
4864 "DNAJC3 PDIA5"
4865 "NHLRC3 NPC1 UBE2J1"
4866 "CTNND1 DFFB DIAPH2 PHLDB1 RNASEH2C WNK2"
4867 "DYSF KIF1B RASIP1 TLR2"
4868 "HNRNPAB HNRNPD"
4869 "C15orf40 LIPE METTL1"
4870 "COL9A2 DNAH10"
4871 "BACH1 BACH2 MAFF MAFG NFE2L1 NFE2L2 NFE2L3 TAF4B"
4872 "C4A CSPG4 ITGA1 MCAM"
4873 "PABPC5 RFX3"
4874 "ACTBL2 CDKL4 DPY19L2"
4875 "CLPTM1 HMOX2 POR SEC63 THEM6 TMED7 TMX2"
4876 "EMC2 EMC3"
4877 "EMC1 EMC10 EMC4 EMC6 EMC7 EMC8 MMGT1"
4878 "STT3A TMED10 TMED2 TMED3 TMED4 TMED5 TMED9"
4879 "ALG5 EBP LCLAT1 LEMD2 LEMD3 PTPN1 SLC27A2 TMED1 TMEM43 UFSP2 VKORC1L1"
4880 "GTPBP1 HMGCS2"
4881 "EIF2S1 EIF2S3 RPL11"
4882 "EIF2S2 EIF5"
4883 "FARSB LRRC47 PRPS1"
4884 "ANXA3 C5"
4885 "ACTBL2 CDKL4 FAM26E"
4886 "ABCC9 CCDC175 EN2 SERPINI2"
4887 "ANKRD18B AP1G2 HOXB8 HTR2B KIF13A PAPOLB ZNF106"
4888 "AP1B1 AP1M1 EPN2"
4889 "AP1G1 DPP3"
4890 "AP2A1 ITSN1"
4891 "AAGAB ABCG1 AFTPH AP1AR AP1M2 AP1S1 AP1S2 AP1S3 HEATR5B NUDT3"
4892 "FBXO34 FOXR1 FOXR2 MORF4L1 MRFAP1L1 PLAC1 SIM2 TRRAP"
4893 "N4BP2 PHACTR4 PPP1R11 PPP1R37 PPP1R3D RASSF7 TANC2"
4894 "EIF2AK4 PDRG1 PIH1D1 RPAP3 URI1 UXT WDR92"
4895 "CCDC85B CSRNP2 GYS2 PLCL2 PPP1R3B PPP1R3F PPP1R9A ZFYVE9"
4896 "CCDC85C PPP1R13B"
4897 "DNAJB2 IL36A"
4898 "AK1 ALDOA PGAM1"
4899 "ACOT13 PYGM"
4900 "GSS NSFL1C PAFAH1B2 PLAA PSMD9 RAB23 SGTA"
4901 "LRRC40 PAK2 PDCD5 PPID TBCB"
4902 "CNDP1 KCNQ5"
4903 "DAGLA GABRB3 MCOLN2 MCOLN3"
4904 "GABRE PIGM"
4905 "BTD CD109 ECE1 LAMP2"
4906 "CYP1A1 DAAM2 EDF1 OSBPL9"
4907 "APEX1 BAG3 LRPAP1"
4908 "SCGN SLC38A5"
4909 "ASTE1 GOLT1B PTGES TMEM237"
4910 "CXCR4 SGPP1 VKORC1"
4911 "CCDC115 SARAF SPAST"
4912 "RNF185 TMEM199"
4913 "TMCO1 YIPF5"
4914 "DLL4 SLC15A1"
4915 "EIF5AL1 SERPINB10"
4916 "CCDC50 MUC13 SEC14L1"
4917 "CELF5 GLRB LINGO2 ZBTB7C"
4918 "BTNL8 LEPR OSBP2"
4919 "LINGO3 NLRP5 TTLL9"
4920 "C3 C4A CSPG4 MCAM"
4921 "CSK IMPA1 LCP1 NARS STXBP1"
4922 "SPINT1 ZNF250"
4923 "FAR1 KLC3 SFI1 SGCA"
4924 "DAD1 TUSC3"
4925 "ANKRD13B CXXC5 TTLL7"
4926 "KRT73 TICAM2"
4927 "LAMB4 METRNL RIMS1"
4928 "DYSF GNG8 KIF1B RASIP1"
4929 "ANKEF1 TERF2 TERF2IP USP37"
4930 "CCAR2 PARP1 RAD50 SF3B3"
4931 "PRKDC TP53BP1 WRN XRCC5 XRCC6"
4932 "TRMT10A ZNF836"
4933 "ABCC4 C4A CSPG4 MCAM"
4934 "ECH1 ETFB HSPE1 PLIN3 PPIF"
4935 "BTD CD109 ECE1 SPRYD7"
4936 "DNAJC10 ELMO3 NRAS ZNF541"
4937 "RAB32 RAB38"
4938 "COL14A1 COL18A1 COL4A2 FAP"
4939 "ATP6V1F CHID1 CYBA"
4940 "CPSF6 KCNT2 MYH4 PIAS2 VAX1"
4941 "DIEXF PCF11 RBM6"
4942 "CAPRIN1 CLP1 CPSF7 ERCC3 MRE11 RBM33 SHROOM3"
4943 "COCH PDIA6"
4944 "DNAJA3 MAP3K15 MAP3K5 TNFSF13B"
4945 "DYM FAM118A FAM160B1"
4946 "ACTBL2 CACNG3 CDKL4"
4947 "ALKBH1 FEZ2 HEATR5A SNX16"
4948 "DOT1L MLLT10 SCAI"
4949 "A1BG EPHA2 FGA GSN ORM2 PAWR ROBO1 SERPINA3 SERPINB1"
4950 "HPX ORM1"
4951 "APOA1 HP"
4952 "RAD17 TNRC18"
4953 "C6orf226 PDZD8 PEX13 PEX7"
4954 "BTN3A1 BTN3A2"
4955 "BTN3A3 CTDNEP1"
4956 "ALDOA ISYNA1 PGAM1"
4957 "FKBP2 SERPINA6"
4958 "CNPY3 DNAJC3 PDIA5 SDF2 SDF2L1"
4959 "CCZ1 KDELC2 POGLUT1"
4960 "GSTK1 MANF"
4961 "GBP2 TTBK2 URM1"
4962 "ADAM17 MGRN1 PTK7 SCARB1 TBC1D10B"
4963 "CACNA2D2 MFGE8 PTPRK"
4964 "ADAM15 CHPF ITGAV PTPRU"
4965 "DCBLD2 HIST3H3 SEMA3C"
4966 "RXRA TP53INP2"
4967 "CACNB4 TENM1"
4968 "FUCA1 GGCT LGALS1 LPP SPTA1"
4969 "HIBADH SERPINB9"
4970 "CHAF1A GRHL1 LIG1 PARG POLA2 RFC1"
4971 "APEX2 CHAF1B MSH6 PCNA POLA1 POLD1 POLD2 POLD3 POLE POLE3 POLE4 RFC2 SLBP TOP2B"
4972 "FAM13A SIVA1 UTY"
4973 "BNC2 DCST2 TMEM14C"
4974 "ACTBL2 CDKL4 PIH1D2"
4975 "KCNJ16 TG"
4976 "CYLD RNF4"
4977 "ATXN2 ITGA4 MAP3K7 MTPAP NOB1 SPATA5L1 TAB2 TRMT112 YTHDF1"
4978 "DDX47 EIF1AX EMG1 GTPBP10 MPG NPM3 PIP5K1A ZNF622"
4979 "ACACA RIPK1 TBC1D2B"
4980 "SPATA5 TCF25"
4981 "AAMP AVEN PNO1 ZC3H7A"
4982 "FBF1 PHKA1"
4983 "PHKA2 TRIP10"
4984 "EIF5B ESF1 YTHDC2"
4985 "CENPV CHD2 IWS1 NIPBL PDS5B POGZ"
4986 "ADNP CHAMP1"
4987 "HSPB8 LZTS1 LZTS2 SESTD1 SIPA1L2 TRAF5 TTLL4 ZMYM6"
4988 "MECOM PRDM16 PRMT8 SPDEF"
4989 "BTD CD109 ECE1 MINPP1"
4990 "ARR3 NFU1"
4991 "HIF1A KIRREL2 VHL ZNF518A"
4992 "LRRC28 RSAD2 USP18"
4993 "ETV6 HSPA1L HSPA2 PCBP4"
4994 "DYRK2 SAV1"
4995 "AMOT AMOTL1 DLGAP5 MPDZ NUP98 PIM2 RNF166"
4996 "DYSF KIF1B RASIP1 TMPRSS13"
4997 "APOE CMPK1 SERPINC1"
4998 "C21orf59 DUSP12"
4999 "CHAC2 NANP"
5000 "ADI1 NUDT15 UBE2R2"
5001 "A4GALT A4GNT ABHD14A BCL2L14"
5002 "MAPK3 PITHD1 WDR45"
5003 "FERMT2 ILK"
5004 "DDI2 EIF4A2 PDE6D"
5005 "SMCO3 SPINK5 WBP2"
5006 "CHMP4A MTUS2 SEC14L2 TFG"
5007 "KIAA1324L LMBR1L NACA2 NXF5"
5008 "DNAH8 DYSF KIF1B RASIP1"
5009 "DPY30 MDC1 QPRT REPS2"
5010 "EMD LMNB1 SMARCB1 TBL1XR1 TRIM28"
